# Supplementary material for: Identification of Novel Genes and Proteoforms in Angiostrongylus costaricensis through a Proteogenomic Approach
Source: MDPI journal article supplement (doi:10.3390/pathogens11111273), 2022-10-31
Supplement: s1 [file s1]

## **Supplementary Information**

### ***Identification of novel genes and proteoforms in Angiostrongylus costaricensis through a proteogenomic approach***

**Esdras Matheus Gomes da Silva**, Karina Mastropasqua Rebello, Young-Jun Choi,  
Vitor Gregorio, Alexandre Rossi Paschoal, Makedonka Mitreva, James H. McKerrow,  
**Ana Gisele da Costa Neves-Ferreira, Fabio Passetti**

This file contains the description of:

- **Supplementary Figures S1-6**
- **Supplementary Tables S1-2**
- **Supplementary Data S1-13**

## Supplementary Figures

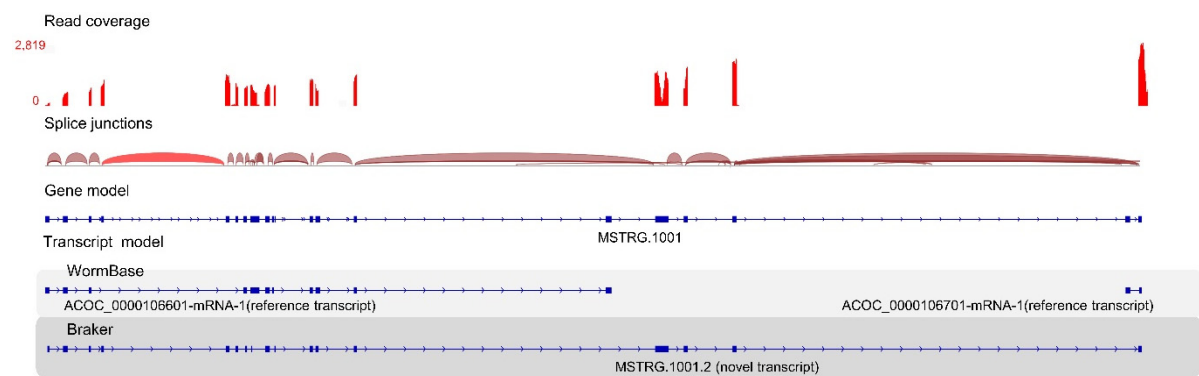

**Supplementary Figure S1.** Example of a WormBase split gene merged by BRAKER annotation.

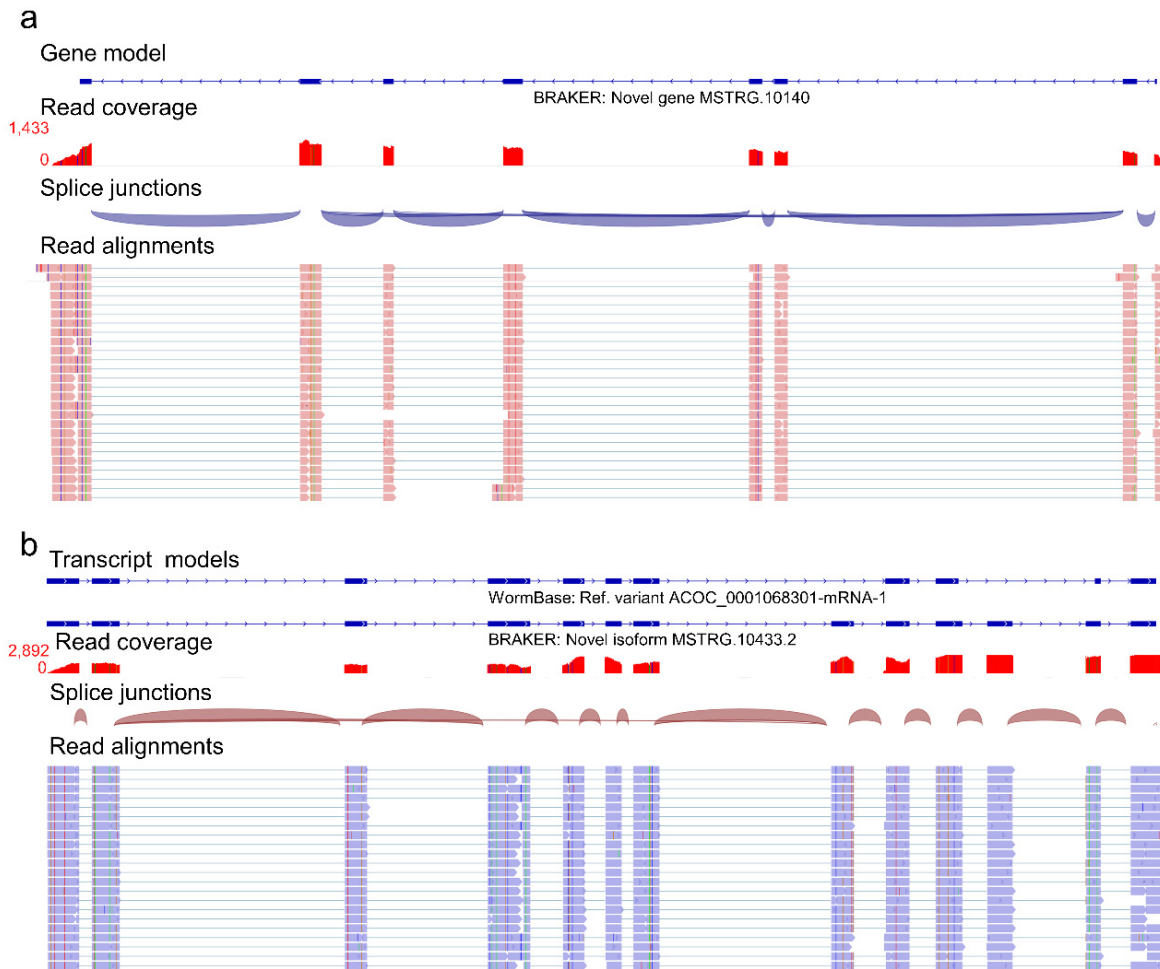

**Supplementary Figure S2.** Visual representation of gene/transcript models and RNA-Seq alignments. **a)** Novel gene predicted by BRAKER with the support of RNA-Seq reads. **b)** Novel transcript variant predicted by BRAKER with the support of RNA-Seq reads.

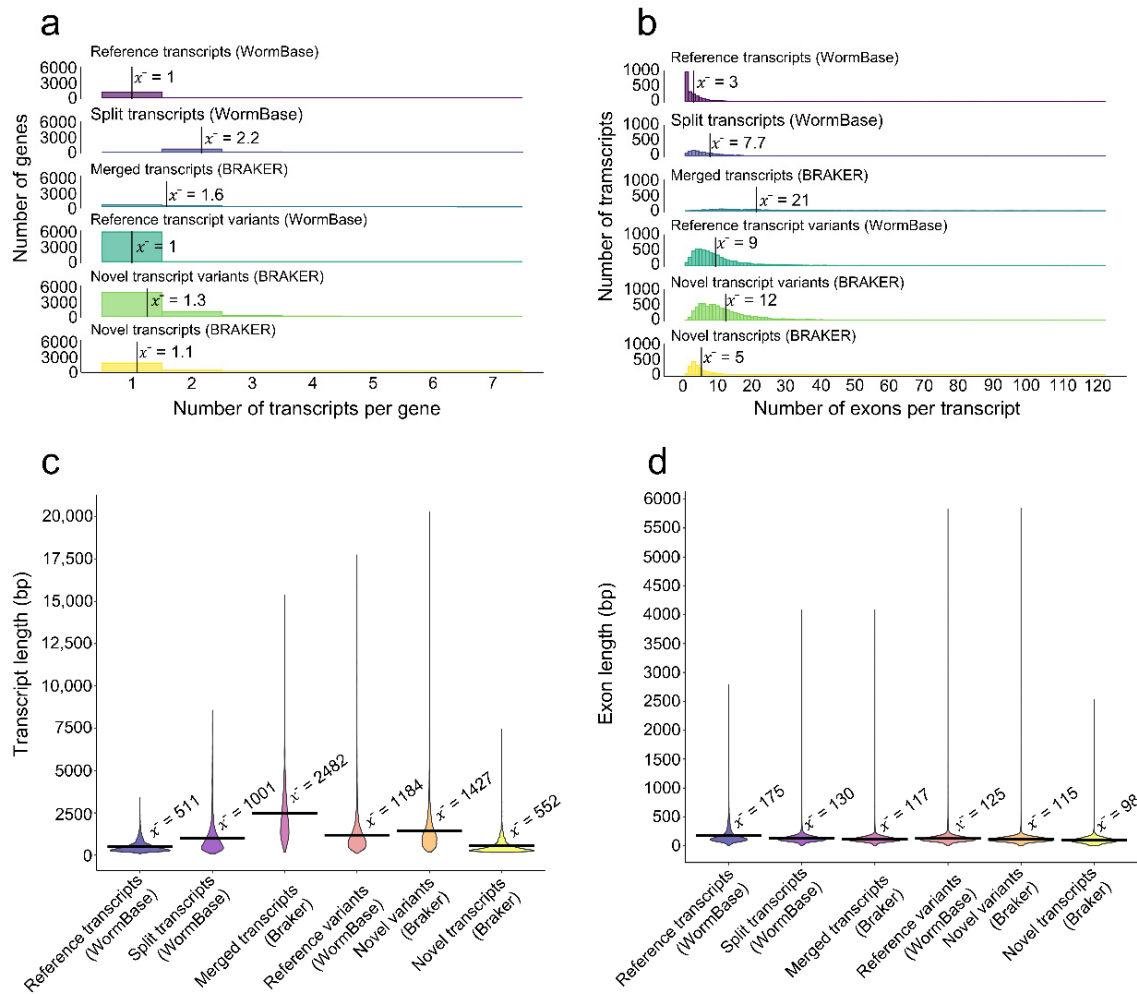

**Supplementary Figure S3.** Distribution of the different features of the supplemented genome annotation. **a)** The histogram represents the distribution of the number of transcripts per gene. **b)** The histogram represents the distribution of the number of exons per transcript. **c)** The violin plot represents the transcript length distribution measured in base pairs (bp). **d)** The violin plot represents the exon length measured in base pairs (bp). Categories: Reference transcripts (WormBase), transcripts exclusive to the WormBase prediction; Transcripts from split genes (WormBase), WormBase transcripts that overlap BRAKER transcripts; Merged transcripts (BRAKER), BRAKER transcripts that overlap WormBase transcripts; Reference transcript variants (WormBase), transcript variants exclusive to the WormBase annotation; Novel transcript variants (BRAKER), transcript variants exclusive to the

BRAKER annotation; Novel transcripts (BRAKER), transcripts exclusive to the BRAKER annotation.

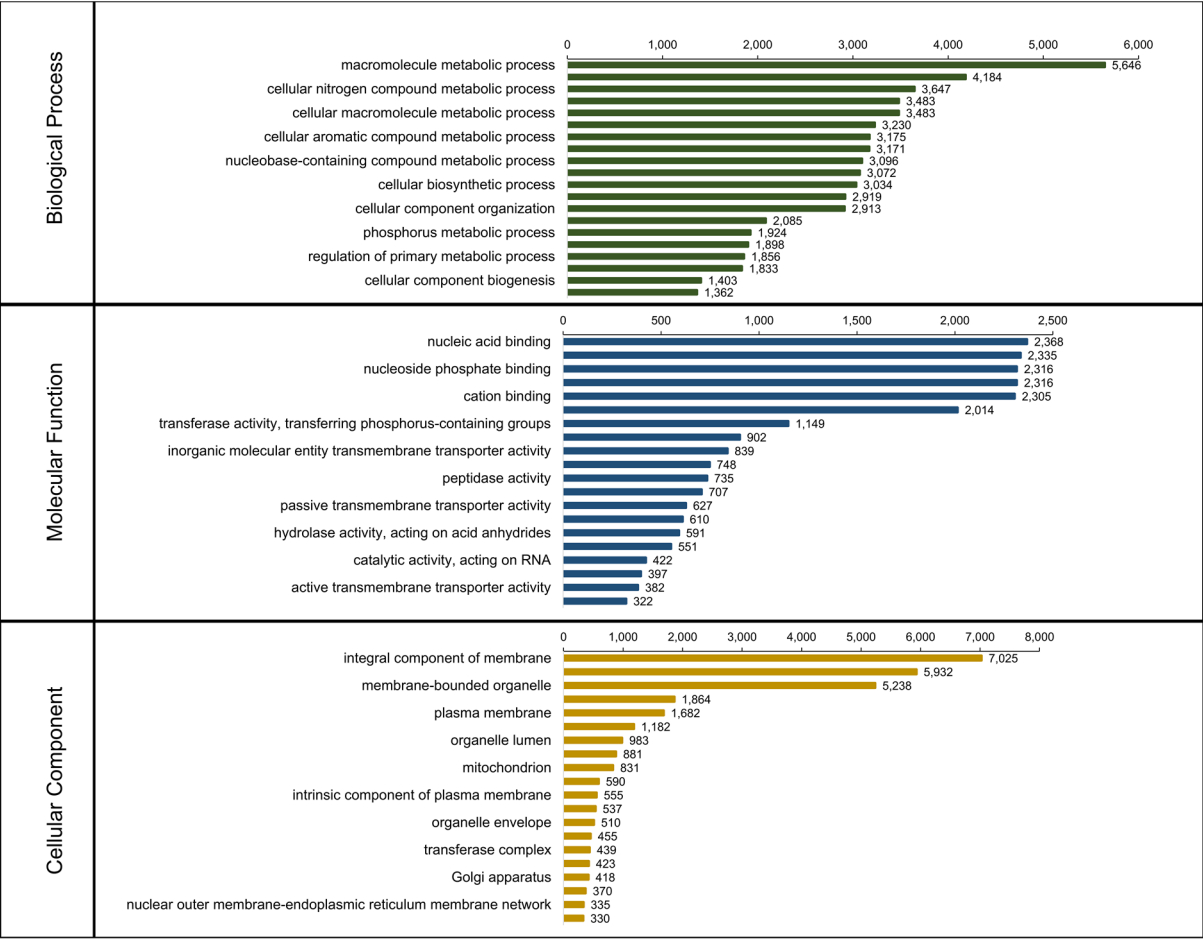

**Supplementary Figure S4.** Distribution of top 10 Gene Ontology (GO) terms. The 4<sup>th</sup> level of GO terms is presented as Biological Process, Molecular Function, and Cellular Component.

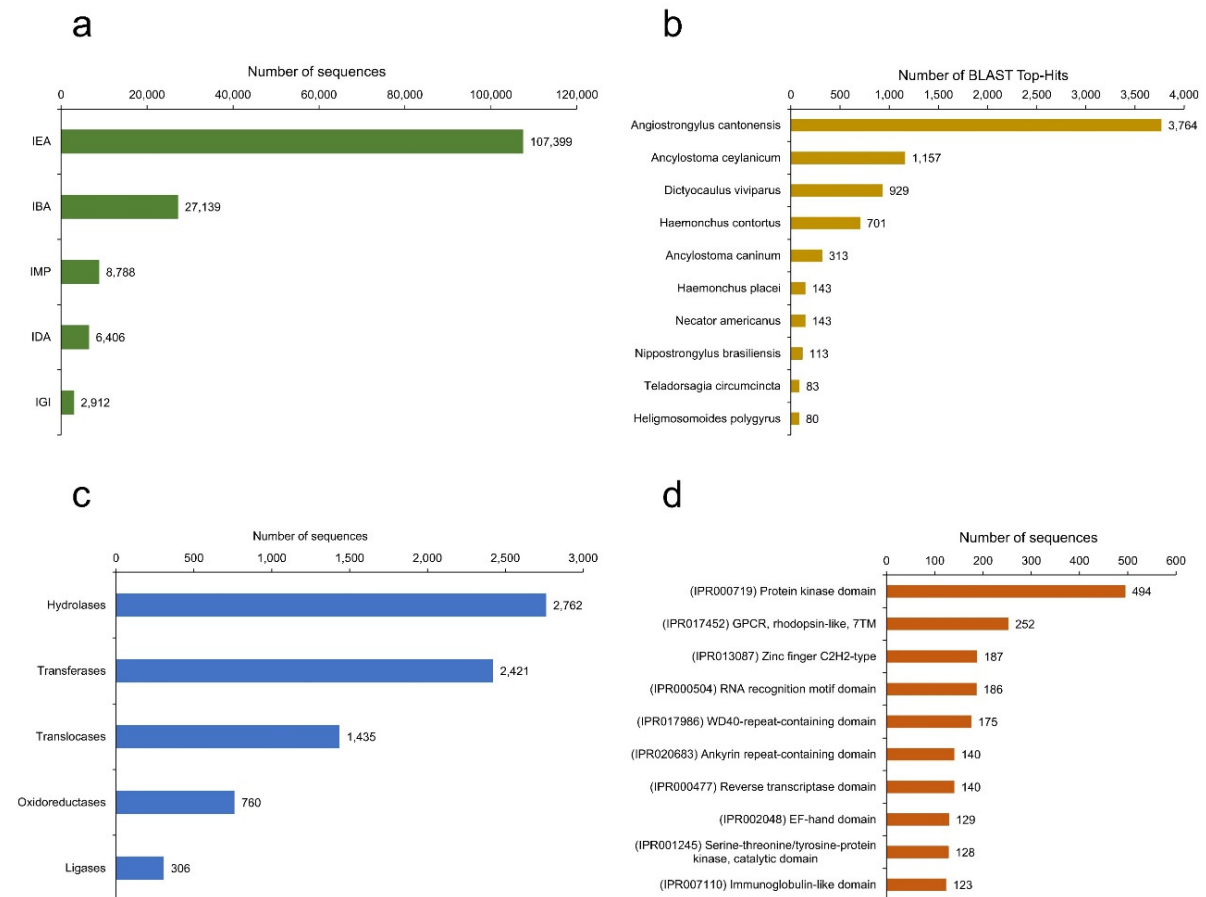

**Supplementary Figure S5. Blast2GO annotation. a)** Top 10 number of protein sequences by annotation evidence code: Inferred from Electronic Annotation (IEA), Inferred from Biological aspect of Ancestor (IBA), Inferred from Mutant Phenotype (IMP), Inferred from Direct Assay (IDA), Inferred from Genetic Interaction (IGI). **b)** Top 10 number of BLAST top-hits by species. **c)** Top 5 number of protein sequences by enzyme annotation. **d)** Top 5 number of protein sequences by InterProt domain annotation.

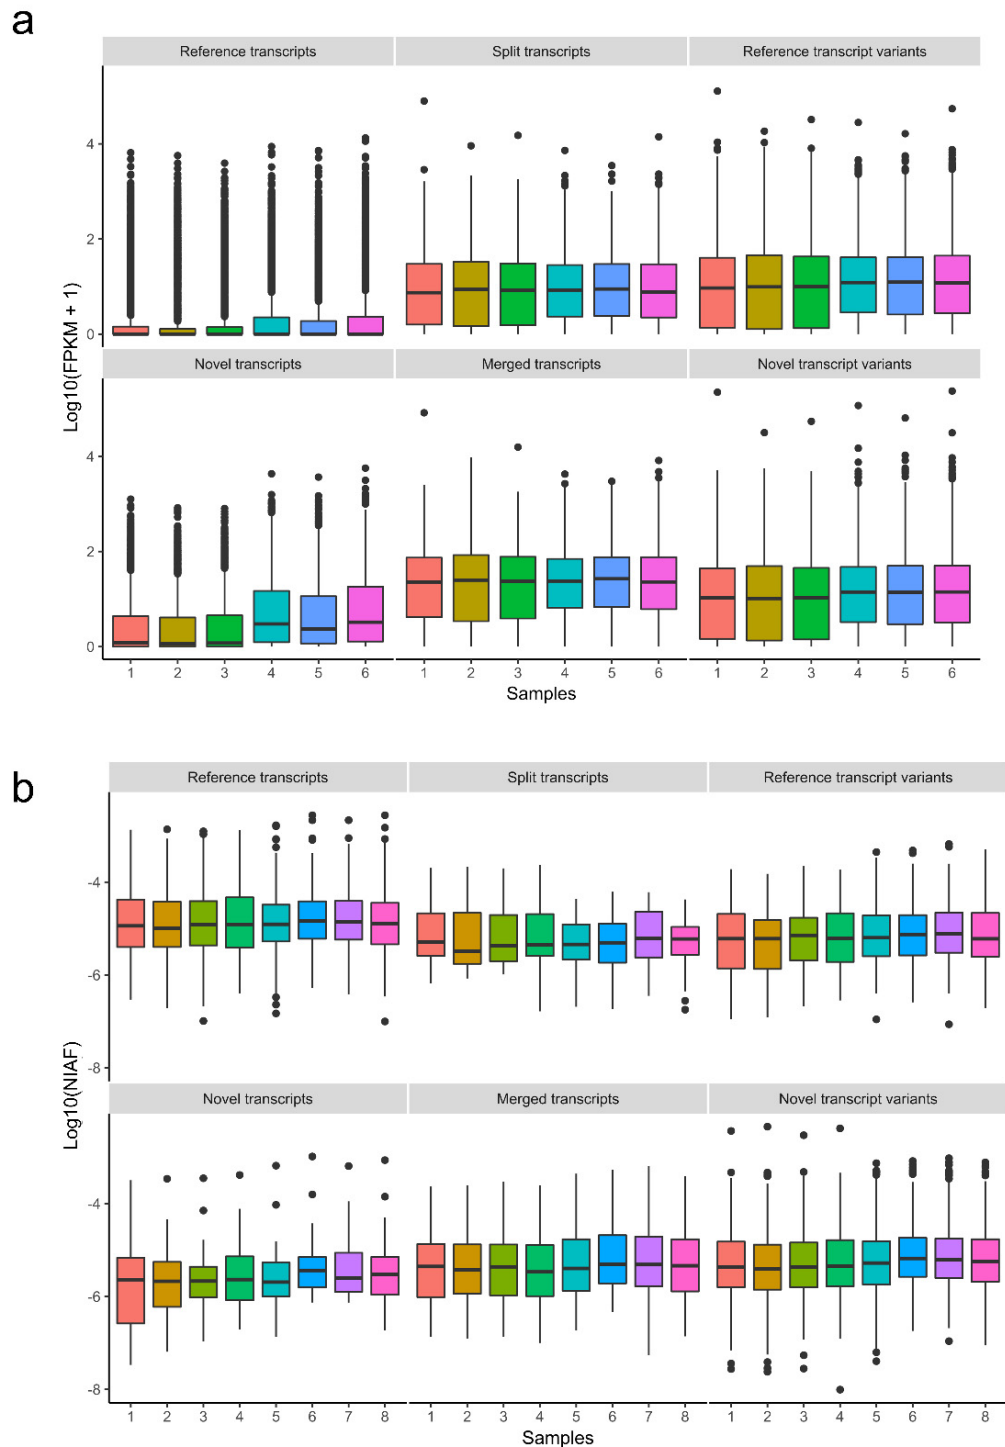

**Supplementary Figure S6.** mRNA and protein abundance levels following *A. costaricensis* transcriptomic and proteomic analyses. **a)** Box plot of mRNA normalized abundance level (FPKM) of each biological replicate. **b)** Box plot of protein normalized abundance level (NIAF) of each biological replicate. mRNA and proteins were categorized as follows: Reference transcripts (WormBase), transcripts exclusive to

WormBase prediction; Transcripts from split genes (WormBase), WormBase transcripts that overlap BRAKER transcript; Merged transcripts (BRAKER), BRAKER transcript that overlaps WormBase transcripts; Reference transcript variants (WormBase), transcript variants exclusive to WormBase annotation; Novel transcript variants (BRAKER), transcript variants exclusive to BRAKER annotation; Novel transcripts (BRAKER), transcripts exclusive to BRAKER annotation.



## Supplementary Tables

**Supplementary Table S1.** Distribution of RNA-Seq reads mapping onto *A. costaricensis* WormBase reference genome sequence and assigned to a gene.

| Samples | Trimmed reads | Uniquely mapped reads | Reads assigned to a gene |
|---------|---------------|-----------------------|--------------------------|
|         |               | Count (rate)          | Count (rate)             |
| 1       | 41,913,390    | 31,619,730 (75%)      | 22,393,341 (53%)         |
| 2       | 35,201,977    | 29,245,656 (83%)      | 13,312,178 (38%)         |
| 3       | 44,645,242    | 32,317,621 (72%)      | 25,845,175 (58%)         |
| 4       | 39,211,262    | 24,708,796 (63%)      | 20,774,227 (53%)         |
| 5       | 48,852,398    | 34,514,824 (71%)      | 29,800,454 (61%)         |
| 6       | 42,949,668    | 25,839,339 (60%)      | 21,609,207 (50%)         |

**Supplementary Table S2.** Comparison of the number of ncRNA genes from *A. costaricensis*, *C. elegans* and *H. contortus*. *A. costaricensis* [FPKM] represent ncRNA genes with evidence of expression.

| ncRNAs            | <i>A. costaricensis</i> | <i>A. costaricensis</i><br>[FPKM] | <i>C. elegans</i><br>(Ensembl) | <i>H. contortus</i><br>(WormBase) |
|-------------------|-------------------------|-----------------------------------|--------------------------------|-----------------------------------|
| antisense_<br>RNA | 0                       | 0                                 | 104                            | 0                                 |
| Cis-reg           | 4                       | 2                                 | 0                              | 0                                 |
| lincRNA           | 0                       | 0                                 | 184                            | 0                                 |
| miRNA             | 8                       | 2                                 | 718                            | 0                                 |
| ncRNA             | 5                       | 5                                 | 7779                           | 0                                 |
| piRNA             | 3                       | 3                                 | 15363                          | 0                                 |
| rRNA              | 19                      | 14                                | 22                             | 2                                 |
| snoRNA            | 1                       | 1                                 | 346                            | 0                                 |
| snRNA             | 8                       | 0                                 | 129                            | 0                                 |
| sRNA              | 1                       | 0                                 | 0                              | 0                                 |
| tRNA              | 377                     | 7                                 | 634                            | 22                                |

## **Supplementary Data**

**Supplementary Data S1.** WormBase

**Supplementary Data S2.** Split genes merged by BRAKER

**Supplementary Data S3.** Shared genes

**Supplementary Data S4.** BRAKER

**Supplementary Data S5.** Transcript lengths and their transcript categories

**Supplementary Data S6.** Protein identifications using the Wormbase database

**Supplementary Data S7.** Top 10 Gene Ontology (GO) terms by the 4th level

**Supplementary Data S8.** Blast2GO functional annotation

**Supplementary Data S9.** Nucleotide and hypothetical amino acid substitutions per transcript

**Supplementary Data S10.** Nucleotide and amino acid substitutions per transcript and their identified peptides

**Supplementary Data S11.** Normalized transcript levels (FPKM) of each quantified transcript

**Supplementary Data S12.** Normalized protein levels (NIAF) of each quantified protein

**Supplementary Data S13.** Mean FPKM and NIAF of each cluster
