# Supplementary material for: Identification of Novel Genes and Proteoforms in Angiostrongylus costaricensis through a Proteogenomic Approach
Source: Pathogens. 2022 Oct 31;11(11):1273. doi: 10.3390/pathogens11111273 (PMC9694666; doi:10.3390/pathogens11111273)
Supplement: Supplementary file 1 [file pathogens-11-01273-s001.zip]

Archive with 14 entries (14 files):
- Supplemental_Data_S1.xlsx
- Supplemental_Data_S10.xlsx
- Supplemental_Data_S11.xlsx
- Supplemental_Data_S12.xlsx
- Supplemental_Data_S13.xlsx
- Supplemental_Data_S2.xlsx
- Supplemental_Data_S3.xlsx
- Supplemental_Data_S4.xlsx
- Supplemental_Data_S5.xlsx
- Supplemental_Data_S6.xlsx
- Supplemental_Data_S7.xlsx
- Supplemental_Data_S8.xlsx
- Supplemental_Data_S9.xlsx
- Supplementary.pdf
