# Supplementary material for: Identification of Novel Genes and Proteoforms in Angiostrongylus costaricensis through a Proteogenomic Approach
Source: Pathogens. 2022 Oct 31;11(11):1273. doi: 10.3390/pathogens11111273 (PMC9694666; doi:10.3390/pathogens11111273)
Supplement: Supplementary file 1 [file pathogens-11-01273-s001.zip › Supplemental_Data_S1.xlsx]

## Sheet: Transcript lengths
Supplemental Data S1. Transcript lengths and their transcript categories
Gene ID	Transcript ID	Transcript length (bp)	Transcript category
MSTRG.1	ACOC_0000000001-mRNA-1	468	Reference transcript variant
MSTRG.2	ACOC_0000000101-mRNA-1	555	Split transcript
MSTRG.2	MSTRG.2.1	5853	Merged transcript
MSTRG.3	ACOC_0000000201-mRNA-1	264	Reference transcript
MSTRG.2	ACOC_0000000301-mRNA-1	5589	Split transcript
MSTRG.4	ACOC_0000000401-mRNA-1	459	Split transcript
MSTRG.4	MSTRG.4.1	1086	Merged transcript
MSTRG.5	ACOC_0000000601-mRNA-1	1083	Reference transcript
MSTRG.6	MSTRG.6.1	534	Novel transcript variant
MSTRG.6	ACOC_0000000701-mRNA-1	483	Reference transcript variant
MSTRG.7	MSTRG.7.1	201	Novel transcript
MSTRG.8	MSTRG.8.1	1128	Novel transcript variant
MSTRG.8	MSTRG.8.2	1083	Novel transcript variant
MSTRG.9	MSTRG.9.1	225	Novel transcript
MSTRG.8	MSTRG.8.3	1143	Novel transcript variant
MSTRG.8	ACOC_0000000901-mRNA-1	1113	Reference transcript variant
MSTRG.11	MSTRG.11.1	849	Novel transcript variant
MSTRG.11	ACOC_0000001101-mRNA-1	837	Reference transcript variant
MSTRG.12	ACOC_0000001201-mRNA-1	792	Reference transcript
MSTRG.13	MSTRG.13.1	1494	Novel transcript variant
MSTRG.13	MSTRG.13.2	1677	Novel transcript variant
MSTRG.13	ACOC_0000001301-mRNA-1	1257	Reference transcript variant
MSTRG.14	MSTRG.14.1	1488	Novel transcript variant
MSTRG.14	ACOC_0000001401-mRNA-1	1500	Reference transcript variant
MSTRG.15	ACOC_0000001501-mRNA-1	570	Reference transcript
MSTRG.16	MSTRG.16.1	5019	Novel transcript variant
MSTRG.16	ACOC_0000001601-mRNA-1	3192	Reference transcript variant
MSTRG.17	ACOC_0000001701-mRNA-1	759	Reference transcript variant
MSTRG.17	MSTRG.17.1	699	Novel transcript variant
MSTRG.18	MSTRG.18.1	1335	Novel transcript variant
MSTRG.18	MSTRG.18.2	1329	Novel transcript variant
MSTRG.18	ACOC_0000001801-mRNA-1	1287	Reference transcript variant
MSTRG.19	MSTRG.19.1	567	Novel transcript variant
MSTRG.19	ACOC_0000001901-mRNA-1	459	Reference transcript variant
MSTRG.20	MSTRG.20.1	810	Novel transcript variant
MSTRG.20	MSTRG.20.2	984	Novel transcript variant
MSTRG.20	MSTRG.20.3	948	Novel transcript variant
MSTRG.20	ACOC_0000002001-mRNA-1	837	Reference transcript variant
MSTRG.21	MSTRG.21.1	351	Novel transcript
ACOC_0000002101	ACOC_0000002101-mRNA-1	246	Reference transcript
MSTRG.22	MSTRG.22.1	5166	Novel transcript variant
MSTRG.22	MSTRG.22.2	5169	Novel transcript variant
MSTRG.23	MSTRG.23.1	2370	Merged transcript
MSTRG.23	ACOC_0000002401-mRNA-1	1905	Split transcript
MSTRG.24	ACOC_0000002501-mRNA-1	1674	Split transcript
MSTRG.24	MSTRG.24.1	2484	Merged transcript
MSTRG.25	MSTRG.25.1	990	Novel transcript
MSTRG.26	ACOC_0000002701-mRNA-1	210	Reference transcript
MSTRG.27	MSTRG.27.1	954	Novel transcript variant
MSTRG.27	ACOC_0000002801-mRNA-1	1293	Reference transcript variant
MSTRG.28	ACOC_0000003001-mRNA-1	1266	Reference transcript variant
ACOC_0000003101	ACOC_0000003101-mRNA-1	252	Reference transcript
MSTRG.29	MSTRG.29.1	204	Novel transcript
MSTRG.30	ACOC_0000003201-mRNA-1	1206	Reference transcript variant
MSTRG.30	MSTRG.30.1	1482	Novel transcript variant
MSTRG.31	MSTRG.31.1	972	Novel transcript variant
MSTRG.31	ACOC_0000003301-mRNA-1	1032	Reference transcript variant
MSTRG.32	MSTRG.32.1	3915	Merged transcript
MSTRG.32	ACOC_0000003601-mRNA-1	1311	Split transcript
MSTRG.33	ACOC_0000003801-mRNA-1	1035	Split transcript
MSTRG.34	MSTRG.34.1	1545	Novel transcript variant
MSTRG.35	MSTRG.35.1	1350	Novel transcript variant
MSTRG.36	ACOC_0000004101-mRNA-1	639	Reference transcript
MSTRG.37	ACOC_0000004201-mRNA-1	1461	Reference transcript variant
MSTRG.37	MSTRG.37.1	1563	Novel transcript variant
MSTRG.38	MSTRG.38.1	1128	Novel transcript variant
MSTRG.39	MSTRG.39.1	2097	Novel transcript variant
MSTRG.39	MSTRG.39.2	3882	Novel transcript variant
MSTRG.40	MSTRG.40.1	9129	Merged transcript
MSTRG.40	MSTRG.40.2	10194	Merged transcript
MSTRG.40	ACOC_0000004601-mRNA-1	396	Split transcript
MSTRG.41	ACOC_0000004701-mRNA-1	213	Reference transcript
MSTRG.40	ACOC_0000004801-mRNA-1	8559	Split transcript
MSTRG.42	ACOC_0000004901-mRNA-1	762	Reference transcript
ACOC_0000005001	ACOC_0000005001-mRNA-1	477	Reference transcript
MSTRG.43	MSTRG.43.1	546	Novel transcript variant
MSTRG.44	MSTRG.44.1	441	Novel transcript
MSTRG.45	MSTRG.45.1	282	Novel transcript
MSTRG.45	MSTRG.45.2	288	Novel transcript
ACOC_0000005201	ACOC_0000005201-mRNA-1	225	Reference transcript
ACOC_0000005301	ACOC_0000005301-mRNA-1	903	Reference transcript
MSTRG.46	MSTRG.46.2	2055	Novel transcript variant
MSTRG.46	ACOC_0000005401-mRNA-1	1704	Reference transcript variant
MSTRG.47	MSTRG.47.1	510	Novel transcript variant
MSTRG.48	ACOC_0000005501-mRNA-1	354	Reference transcript
MSTRG.47	ACOC_0000005601-mRNA-1	357	Reference transcript variant
MSTRG.49	ACOC_0000005701-mRNA-1	702	Split transcript
MSTRG.49	MSTRG.49.1	4599	Merged transcript
MSTRG.49	MSTRG.49.2	4632	Merged transcript
MSTRG.49	ACOC_0000005901-mRNA-1	2481	Split transcript
MSTRG.49	ACOC_0000006001-mRNA-1	1032	Split transcript
MSTRG.50	MSTRG.50.1	1950	Novel transcript variant
MSTRG.51	MSTRG.51.1	1050	Novel transcript
MSTRG.52	MSTRG.52.1	813	Novel transcript variant
MSTRG.53	MSTRG.53.1	1215	Novel transcript variant
MSTRG.53	ACOC_0000006301-mRNA-1	993	Reference transcript variant
MSTRG.54	MSTRG.54.1	2694	Novel transcript variant
MSTRG.54	ACOC_0000006401-mRNA-1	2334	Reference transcript variant
MSTRG.55	ACOC_0000006501-mRNA-1	333	Reference transcript
ACOC_0000006601	ACOC_0000006601-mRNA-1	372	Reference transcript
MSTRG.56	MSTRG.56.1	1140	Novel transcript variant
MSTRG.56	ACOC_0000006701-mRNA-1	1134	Reference transcript variant
MSTRG.57	MSTRG.57.1	5235	Novel transcript variant
ACOC_0000006901	ACOC_0000006901-mRNA-1	348	Reference transcript
MSTRG.58	ACOC_0000007001-mRNA-1	540	Reference transcript
MSTRG.59	MSTRG.59.1	315	Novel transcript
MSTRG.60	MSTRG.60.1	2562	Novel transcript variant
MSTRG.60	MSTRG.60.2	2736	Novel transcript variant
MSTRG.60	ACOC_0000007101-mRNA-1	2610	Reference transcript variant
MSTRG.61	MSTRG.61.1	1200	Novel transcript variant
MSTRG.62	MSTRG.62.1	990	Novel transcript
MSTRG.63	ACOC_0000007301-mRNA-1	594	Reference transcript
MSTRG.64	MSTRG.64.1	381	Novel transcript variant
MSTRG.64	ACOC_0000007401-mRNA-1	354	Reference transcript variant
MSTRG.65	MSTRG.65.1	945	Novel transcript variant
MSTRG.65	ACOC_0000007501-mRNA-1	759	Reference transcript variant
MSTRG.66	MSTRG.66.1	762	Novel transcript variant
MSTRG.66	ACOC_0000007601-mRNA-1	1167	Reference transcript variant
MSTRG.66	MSTRG.66.3	873	Novel transcript variant
MSTRG.67	ACOC_0000007701-mRNA-1	249	Reference transcript
MSTRG.68	ACOC_0000007801-mRNA-1	252	Split transcript
MSTRG.68	MSTRG.68.1	1284	Merged transcript
MSTRG.68	MSTRG.68.3	1212	Merged transcript
MSTRG.68	ACOC_0000007901-mRNA-1	483	Split transcript
MSTRG.69	MSTRG.69.1	363	Novel transcript variant
MSTRG.69	MSTRG.69.3	264	Novel transcript variant
MSTRG.70	MSTRG.70.1	1281	Novel transcript variant
MSTRG.70	ACOC_0000008201-mRNA-1	1932	Reference transcript variant
MSTRG.70	MSTRG.70.3	5040	Novel transcript variant
MSTRG.71	MSTRG.71.1	624	Novel transcript variant
MSTRG.71	ACOC_0000008301-mRNA-1	552	Reference transcript variant
MSTRG.72	MSTRG.72.2	585	Novel transcript variant
MSTRG.73	ACOC_0000008501-mRNA-1	180	Reference transcript variant
MSTRG.73	MSTRG.73.1	207	Novel transcript variant
MSTRG.74	MSTRG.74.1	1968	Novel transcript variant
MSTRG.74	MSTRG.74.2	1959	Novel transcript variant
MSTRG.75	MSTRG.75.1	1107	Novel transcript variant
MSTRG.75	MSTRG.75.2	1329	Novel transcript variant
MSTRG.75	ACOC_0000008701-mRNA-1	1281	Reference transcript variant
MSTRG.76	ACOC_0000008801-mRNA-1	618	Reference transcript
MSTRG.77	ACOC_0000008901-mRNA-1	708	Reference transcript variant
MSTRG.77	MSTRG.77.1	957	Novel transcript variant
MSTRG.78	ACOC_0000009001-mRNA-1	3756	Reference transcript variant
MSTRG.78	MSTRG.78.2	6483	Novel transcript variant
MSTRG.79	MSTRG.79.1	1086	Novel transcript variant
MSTRG.80	MSTRG.80.1	1209	Novel transcript variant
MSTRG.80	ACOC_0000009201-mRNA-1	894	Reference transcript variant
MSTRG.81	MSTRG.81.1	549	Novel transcript
ACOC_0000009301	ACOC_0000009301-mRNA-1	321	Reference transcript
MSTRG.82	MSTRG.82.1	1701	Novel transcript variant
MSTRG.82	ACOC_0000009401-mRNA-1	1503	Reference transcript variant
MSTRG.83	MSTRG.83.1	804	Novel transcript variant
MSTRG.84	ACOC_0000009601-mRNA-1	1917	Reference transcript variant
MSTRG.84	MSTRG.84.1	2091	Novel transcript variant
MSTRG.85	MSTRG.85.1	942	Novel transcript variant
MSTRG.85	ACOC_0000009701-mRNA-1	903	Reference transcript variant
MSTRG.86	MSTRG.86.1	1563	Novel transcript variant
MSTRG.86	ACOC_0000009801-mRNA-1	1413	Reference transcript variant
MSTRG.87	ACOC_0000009901-mRNA-1	2130	Reference transcript variant
MSTRG.87	MSTRG.87.3	1758	Novel transcript variant
ACOC_0000010001	ACOC_0000010001-mRNA-1	414	Reference transcript
ACOC_0000010101	ACOC_0000010101-mRNA-1	234	Reference transcript
MSTRG.88	ACOC_0000010201-mRNA-1	249	Reference transcript
MSTRG.89	MSTRG.89.2	399	Merged transcript
MSTRG.89	MSTRG.89.3	510	Merged transcript
MSTRG.89	MSTRG.89.4	1245	Merged transcript
MSTRG.90	MSTRG.90.1	807	Novel transcript variant
MSTRG.90	ACOC_0000010501-mRNA-1	858	Reference transcript variant
MSTRG.91	MSTRG.91.1	438	Merged transcript
MSTRG.91	ACOC_0000010701-mRNA-1	474	Split transcript
MSTRG.92	MSTRG.92.1	2115	Novel transcript variant
MSTRG.92	ACOC_0000010801-mRNA-1	1629	Reference transcript variant
MSTRG.93	ACOC_0000010901-mRNA-1	1770	Reference transcript
MSTRG.94	MSTRG.94.1	738	Novel transcript variant
MSTRG.94	ACOC_0000011001-mRNA-1	972	Reference transcript variant
MSTRG.95	MSTRG.95.1	1677	Novel transcript variant
MSTRG.95	ACOC_0000011101-mRNA-1	1431	Reference transcript variant
MSTRG.96	ACOC_0000011201-mRNA-1	318	Split transcript
MSTRG.96	MSTRG.96.1	2181	Merged transcript
MSTRG.96	MSTRG.96.2	2190	Merged transcript
MSTRG.96	MSTRG.96.3	2148	Merged transcript
MSTRG.96	ACOC_0000011301-mRNA-1	948	Split transcript
MSTRG.97	ACOC_0000011401-mRNA-1	834	Reference transcript variant
MSTRG.97	MSTRG.97.1	1050	Novel transcript variant
ACOC_0000011501	ACOC_0000011501-mRNA-1	360	Reference transcript
MSTRG.98	MSTRG.98.1	2805	Novel transcript variant
MSTRG.99	MSTRG.99.1	1503	Novel transcript variant
MSTRG.99	ACOC_0000011701-mRNA-1	1317	Reference transcript variant
ACOC_0000011801	ACOC_0000011801-mRNA-1	348	Reference transcript
MSTRG.100	MSTRG.100.1	3660	Novel transcript variant
ACOC_0000012001	ACOC_0000012001-mRNA-1	501	Reference transcript
MSTRG.101	ACOC_0000012101-mRNA-1	2727	Reference transcript variant
MSTRG.101	MSTRG.101.2	2358	Novel transcript variant
MSTRG.102	MSTRG.102.1	963	Novel transcript variant
MSTRG.102	ACOC_0000012201-mRNA-1	984	Reference transcript variant
MSTRG.103	ACOC_0000012301-mRNA-1	1296	Reference transcript
MSTRG.104	MSTRG.104.1	2409	Novel transcript variant
MSTRG.105	MSTRG.105.1	288	Novel transcript
MSTRG.106	ACOC_0000012501-mRNA-1	948	Split transcript
MSTRG.106	MSTRG.106.1	2370	Merged transcript
MSTRG.106	MSTRG.106.2	2382	Merged transcript
MSTRG.107	ACOC_0000012601-mRNA-1	306	Reference transcript
MSTRG.106	ACOC_0000012701-mRNA-1	729	Split transcript
MSTRG.108	MSTRG.108.1	210	Novel transcript
MSTRG.109	MSTRG.109.1	1326	Novel transcript variant
MSTRG.110	MSTRG.110.1	1290	Novel transcript variant
MSTRG.111	MSTRG.111.1	1065	Novel transcript variant
MSTRG.111	ACOC_0000013001-mRNA-1	1008	Reference transcript variant
MSTRG.112	MSTRG.112.1	834	Novel transcript variant
MSTRG.112	ACOC_0000013101-mRNA-1	495	Reference transcript variant
MSTRG.113	ACOC_0000013201-mRNA-1	975	Reference transcript variant
MSTRG.113	MSTRG.113.1	1047	Novel transcript variant
MSTRG.114	MSTRG.114.1	630	Novel transcript variant
MSTRG.115	MSTRG.115.1	909	Novel transcript
MSTRG.116	MSTRG.116.1	1335	Novel transcript variant
MSTRG.116	MSTRG.116.2	1356	Novel transcript variant
MSTRG.116	ACOC_0000013401-mRNA-1	1323	Reference transcript variant
MSTRG.117	MSTRG.117.1	2238	Novel transcript variant
MSTRG.118	MSTRG.118.1	318	Novel transcript
MSTRG.119	ACOC_0000013601-mRNA-1	2013	Reference transcript variant
MSTRG.119	MSTRG.119.1	2391	Novel transcript variant
MSTRG.119	MSTRG.119.2	2400	Novel transcript variant
MSTRG.119	MSTRG.119.3	2439	Novel transcript variant
MSTRG.120	MSTRG.120.1	3744	Novel transcript variant
MSTRG.120	ACOC_0000013701-mRNA-1	3654	Reference transcript variant
MSTRG.121	MSTRG.121.1	1227	Merged transcript
MSTRG.121	MSTRG.121.2	1251	Merged transcript
MSTRG.121	ACOC_0000013801-mRNA-1	519	Split transcript
MSTRG.121	ACOC_0000013901-mRNA-1	150	Split transcript
MSTRG.122	MSTRG.122.1	1854	Novel transcript variant
MSTRG.123	MSTRG.123.1	618	Novel transcript variant
MSTRG.123	ACOC_0000014101-mRNA-1	447	Reference transcript variant
MSTRG.124	MSTRG.124.1	354	Novel transcript variant
MSTRG.125	MSTRG.125.1	201	Novel transcript variant
MSTRG.125	ACOC_0000014301-mRNA-1	153	Reference transcript variant
MSTRG.126	MSTRG.126.1	1236	Novel transcript variant
MSTRG.126	ACOC_0000014401-mRNA-1	1089	Reference transcript variant
MSTRG.127	MSTRG.127.1	876	Novel transcript variant
MSTRG.128	ACOC_0000014601-mRNA-1	879	Reference transcript variant
MSTRG.128	MSTRG.128.1	912	Novel transcript variant
MSTRG.129	ACOC_0000014701-mRNA-1	621	Reference transcript
ACOC_0000014801	ACOC_0000014801-mRNA-1	222	Reference transcript
MSTRG.130	MSTRG.130.1	1101	Novel transcript variant
MSTRG.131	ACOC_0000014901-mRNA-1	339	Reference transcript
MSTRG.132	MSTRG.132.1	696	Novel transcript variant
MSTRG.132	ACOC_0000015101-mRNA-1	726	Reference transcript variant
MSTRG.133	MSTRG.133.1	1365	Novel transcript variant
MSTRG.133	ACOC_0000015201-mRNA-1	1134	Reference transcript variant
MSTRG.134	MSTRG.134.1	1032	Novel transcript variant
MSTRG.134	ACOC_0000015301-mRNA-1	1062	Reference transcript variant
MSTRG.135	MSTRG.135.1	1407	Novel transcript variant
MSTRG.135	ACOC_0000015401-mRNA-1	1017	Reference transcript variant
MSTRG.136	ACOC_0000015501-mRNA-1	387	Reference transcript
MSTRG.137	MSTRG.137.1	1161	Novel transcript variant
MSTRG.137	ACOC_0000015601-mRNA-1	1251	Reference transcript variant
MSTRG.138	MSTRG.138.1	1146	Novel transcript variant
MSTRG.138	ACOC_0000015701-mRNA-1	495	Reference transcript variant
MSTRG.140	MSTRG.140.1	693	Novel transcript variant
MSTRG.140	ACOC_0000015801-mRNA-1	276	Reference transcript variant
MSTRG.141	MSTRG.141.1	4947	Merged transcript
MSTRG.141	MSTRG.141.2	4974	Merged transcript
MSTRG.141	MSTRG.141.3	4980	Merged transcript
MSTRG.142	MSTRG.142.1	1098	Novel transcript variant
MSTRG.142	ACOC_0000016101-mRNA-1	1122	Reference transcript variant
MSTRG.143	ACOC_0000016201-mRNA-1	693	Reference transcript variant
MSTRG.143	MSTRG.143.1	768	Novel transcript variant
MSTRG.143	MSTRG.143.2	867	Novel transcript variant
ACOC_0000016301	ACOC_0000016301-mRNA-1	645	Reference transcript
MSTRG.144	ACOC_0000016401-mRNA-1	879	Reference transcript variant
MSTRG.144	MSTRG.144.1	1137	Novel transcript variant
MSTRG.145	MSTRG.145.1	1455	Merged transcript
MSTRG.145	ACOC_0000016501-mRNA-1	1113	Split transcript
MSTRG.146	ACOC_0000016601-mRNA-1	1320	Reference transcript
MSTRG.145	ACOC_0000016701-mRNA-1	375	Split transcript
MSTRG.147	ACOC_0000016801-mRNA-1	2412	Reference transcript variant
MSTRG.148	MSTRG.148.1	357	Novel transcript
MSTRG.149	ACOC_0000016901-mRNA-1	2607	Reference transcript variant
MSTRG.150	MSTRG.150.1	315	Novel transcript
MSTRG.151	MSTRG.151.1	2919	Novel transcript variant
MSTRG.152	MSTRG.152.1	441	Novel transcript
MSTRG.152	MSTRG.152.2	501	Novel transcript
MSTRG.153	MSTRG.153.1	237	Novel transcript
MSTRG.154	MSTRG.154.1	633	Novel transcript variant
MSTRG.155	MSTRG.155.1	504	Novel transcript
MSTRG.156	MSTRG.156.2	1596	Novel transcript variant
MSTRG.157	MSTRG.157.1	1230	Merged transcript
MSTRG.157	ACOC_0000017401-mRNA-1	354	Split transcript
MSTRG.158	MSTRG.158.1	2787	Merged transcript
MSTRG.158	ACOC_0000017601-mRNA-1	2445	Split transcript
MSTRG.159	MSTRG.159.1	1041	Novel transcript variant
MSTRG.159	ACOC_0000017701-mRNA-1	912	Reference transcript variant
MSTRG.161	ACOC_0000017801-mRNA-1	363	Reference transcript variant
MSTRG.160	ACOC_0000017901-mRNA-1	711	Reference transcript variant
MSTRG.162	MSTRG.162.1	3012	Merged transcript
MSTRG.162	MSTRG.162.2	3024	Merged transcript
MSTRG.162	ACOC_0000018101-mRNA-1	546	Split transcript
MSTRG.163	MSTRG.163.1	1554	Novel transcript variant
MSTRG.163	ACOC_0000018201-mRNA-1	543	Reference transcript variant
MSTRG.164	MSTRG.164.1	2268	Novel transcript variant
MSTRG.164	ACOC_0000018301-mRNA-1	2226	Reference transcript variant
MSTRG.165	MSTRG.165.1	2022	Merged transcript
MSTRG.165	ACOC_0000018501-mRNA-1	258	Split transcript
MSTRG.166	MSTRG.166.1	819	Novel transcript
MSTRG.167	MSTRG.167.1	1131	Novel transcript variant
MSTRG.169	MSTRG.169.1	687	Novel transcript variant
MSTRG.169	ACOC_0000018801-mRNA-1	408	Reference transcript variant
MSTRG.170	ACOC_0000018901-mRNA-1	1071	Reference transcript variant
MSTRG.170	MSTRG.170.2	978	Novel transcript variant
MSTRG.171	MSTRG.171.1	1821	Novel transcript variant
MSTRG.171	MSTRG.171.2	2178	Novel transcript variant
MSTRG.171	ACOC_0000019001-mRNA-1	2208	Reference transcript variant
MSTRG.171	MSTRG.171.4	489	Novel transcript variant
MSTRG.172	MSTRG.172.1	246	Novel transcript
ACOC_0000019101	ACOC_0000019101-mRNA-1	282	Reference transcript
MSTRG.173	MSTRG.173.1	4833	Merged transcript
MSTRG.173	MSTRG.173.2	6315	Merged transcript
MSTRG.173	ACOC_0000019201-mRNA-1	5397	Split transcript
MSTRG.173	MSTRG.173.4	4314	Merged transcript
MSTRG.174	ACOC_0000019401-mRNA-1	267	Reference transcript
MSTRG.175	MSTRG.175.1	306	Novel transcript variant
MSTRG.175	ACOC_0000019501-mRNA-1	423	Reference transcript variant
MSTRG.176	ACOC_0000019601-mRNA-1	768	Reference transcript variant
MSTRG.176	MSTRG.176.2	669	Novel transcript variant
MSTRG.177	MSTRG.177.1	1152	Novel transcript variant
MSTRG.177	MSTRG.177.2	1224	Novel transcript variant
ACOC_0000019801	ACOC_0000019801-mRNA-1	519	Reference transcript
MSTRG.178	MSTRG.178.1	19995	Novel transcript variant
MSTRG.178	MSTRG.178.2	20274	Novel transcript variant
MSTRG.179	MSTRG.179.1	927	Novel transcript variant
MSTRG.179	ACOC_0000020001-mRNA-1	939	Reference transcript variant
MSTRG.181	MSTRG.181.1	1665	Novel transcript variant
MSTRG.181	ACOC_0000020201-mRNA-1	828	Reference transcript variant
MSTRG.182	ACOC_0000020301-mRNA-1	1185	Reference transcript variant
MSTRG.182	MSTRG.182.1	1338	Novel transcript variant
MSTRG.183	MSTRG.183.1	1866	Novel transcript variant
MSTRG.183	ACOC_0000020401-mRNA-1	1494	Reference transcript variant
MSTRG.184	MSTRG.184.1	1770	Merged transcript
MSTRG.184	ACOC_0000020501-mRNA-1	1224	Split transcript
MSTRG.184	ACOC_0000020601-mRNA-1	387	Split transcript
MSTRG.186	ACOC_0000020801-mRNA-1	2091	Reference transcript variant
MSTRG.187	MSTRG.187.1	2301	Novel transcript variant
MSTRG.188	MSTRG.188.1	3174	Merged transcript
MSTRG.188	ACOC_0000021101-mRNA-1	1800	Split transcript
MSTRG.189	ACOC_0000021201-mRNA-1	2439	Reference transcript variant
MSTRG.189	MSTRG.189.1	3177	Novel transcript variant
MSTRG.190	ACOC_0000021301-mRNA-1	2337	Split transcript
MSTRG.190	MSTRG.190.1	2703	Merged transcript
MSTRG.190	MSTRG.190.3	1650	Merged transcript
MSTRG.190	ACOC_0000021401-mRNA-1	696	Split transcript
MSTRG.191	MSTRG.191.1	555	Novel transcript variant
MSTRG.192	MSTRG.192.1	402	Novel transcript
MSTRG.193	MSTRG.193.1	1368	Novel transcript variant
MSTRG.193	MSTRG.193.2	1455	Novel transcript variant
MSTRG.194	MSTRG.194.1	306	Novel transcript
MSTRG.195	ACOC_0000021701-mRNA-1	471	Reference transcript variant
MSTRG.195	MSTRG.195.1	315	Novel transcript variant
MSTRG.196	MSTRG.196.1	591	Novel transcript variant
MSTRG.196	ACOC_0000021801-mRNA-1	615	Reference transcript variant
MSTRG.197	MSTRG.197.1	228	Novel transcript
MSTRG.198	MSTRG.198.1	1329	Novel transcript variant
MSTRG.199	ACOC_0000022101-mRNA-1	330	Reference transcript
MSTRG.200	ACOC_0000022201-mRNA-1	852	Reference transcript variant
MSTRG.200	MSTRG.200.1	1338	Novel transcript variant
MSTRG.201	MSTRG.201.1	1032	Novel transcript variant
MSTRG.201	ACOC_0000022301-mRNA-1	1110	Reference transcript variant
MSTRG.202	MSTRG.202.1	1026	Novel transcript variant
MSTRG.202	ACOC_0000022401-mRNA-1	2211	Reference transcript variant
MSTRG.202	MSTRG.202.3	954	Novel transcript variant
MSTRG.203	ACOC_0000022501-mRNA-1	1038	Reference transcript variant
MSTRG.203	MSTRG.203.1	1194	Novel transcript variant
MSTRG.204	ACOC_0000022601-mRNA-1	558	Reference transcript
MSTRG.205	MSTRG.205.1	717	Novel transcript variant
MSTRG.205	ACOC_0000022701-mRNA-1	705	Reference transcript variant
MSTRG.206	MSTRG.206.1	249	Novel transcript
MSTRG.207	MSTRG.207.1	1218	Novel transcript variant
MSTRG.207	ACOC_0000022801-mRNA-1	1230	Reference transcript variant
MSTRG.208	MSTRG.208.1	3423	Merged transcript
MSTRG.208	ACOC_0000022901-mRNA-1	1527	Split transcript
MSTRG.208	ACOC_0000023001-mRNA-1	1125	Split transcript
MSTRG.208	MSTRG.208.4	666	Merged transcript
MSTRG.209	MSTRG.209.1	1668	Novel transcript variant
MSTRG.210	MSTRG.210.1	2589	Novel transcript
MSTRG.211	ACOC_0000023201-mRNA-1	783	Reference transcript
MSTRG.212	MSTRG.212.1	2328	Novel transcript variant
MSTRG.213	MSTRG.213.1	273	Novel transcript
MSTRG.214	ACOC_0000023401-mRNA-1	1014	Reference transcript variant
MSTRG.214	MSTRG.214.1	1326	Novel transcript variant
MSTRG.215	ACOC_0000023501-mRNA-1	600	Reference transcript
MSTRG.216	MSTRG.216.1	891	Novel transcript variant
MSTRG.217	MSTRG.217.1	1506	Novel transcript variant
MSTRG.219	MSTRG.219.1	2103	Merged transcript
MSTRG.219	MSTRG.219.2	2124	Merged transcript
MSTRG.219	ACOC_0000023801-mRNA-1	933	Split transcript
MSTRG.219	ACOC_0000023901-mRNA-1	1116	Split transcript
MSTRG.220	MSTRG.220.1	243	Novel transcript
MSTRG.221	ACOC_0000024001-mRNA-1	3162	Reference transcript variant
MSTRG.221	MSTRG.221.1	3738	Novel transcript variant
ACOC_0000024101	ACOC_0000024101-mRNA-1	486	Reference transcript
MSTRG.222	MSTRG.222.1	492	Novel transcript variant
MSTRG.222	ACOC_0000024201-mRNA-1	468	Reference transcript variant
MSTRG.223	MSTRG.223.2	2871	Novel transcript variant
MSTRG.223	MSTRG.223.1	3915	Novel transcript variant
MSTRG.223	ACOC_0000024301-mRNA-1	798	Reference transcript variant
MSTRG.224	MSTRG.224.1	228	Novel transcript
MSTRG.225	MSTRG.225.1	1857	Novel transcript variant
MSTRG.226	MSTRG.226.1	2730	Novel transcript variant
MSTRG.227	MSTRG.227.1	1320	Novel transcript variant
MSTRG.227	ACOC_0000024601-mRNA-1	1551	Reference transcript variant
MSTRG.228	ACOC_0000024701-mRNA-1	1131	Reference transcript variant
MSTRG.229	MSTRG.229.1	2085	Novel transcript variant
MSTRG.229	ACOC_0000024801-mRNA-1	2514	Reference transcript variant
MSTRG.229	MSTRG.229.3	1323	Novel transcript variant
MSTRG.230	ACOC_0000024901-mRNA-1	432	Reference transcript
MSTRG.231	ACOC_0000025001-mRNA-1	1074	Reference transcript variant
MSTRG.232	MSTRG.232.1	8355	Novel transcript variant
MSTRG.233	MSTRG.233.1	1521	Novel transcript variant
MSTRG.234	MSTRG.234.1	1200	Merged transcript
MSTRG.234	ACOC_0000025401-mRNA-1	456	Split transcript
MSTRG.235	MSTRG.235.1	1188	Novel transcript variant
MSTRG.236	MSTRG.236.1	3075	Merged transcript
MSTRG.236	MSTRG.236.2	3117	Merged transcript
MSTRG.236	ACOC_0000025601-mRNA-1	1425	Split transcript
MSTRG.237	ACOC_0000025801-mRNA-1	1146	Split transcript
MSTRG.237	ACOC_0000025901-mRNA-1	549	Split transcript
MSTRG.238	MSTRG.238.1	3828	Novel transcript variant
MSTRG.238	ACOC_0000026001-mRNA-1	2163	Reference transcript variant
MSTRG.239	MSTRG.239.1	429	Novel transcript variant
MSTRG.240	MSTRG.240.1	3450	Novel transcript variant
MSTRG.240	MSTRG.240.2	3486	Novel transcript variant
MSTRG.241	MSTRG.241.1	591	Novel transcript variant
MSTRG.241	MSTRG.241.3	5574	Novel transcript variant
MSTRG.241	MSTRG.241.4	5613	Novel transcript variant
ACOC_0000026401	ACOC_0000026401-mRNA-1	210	Reference transcript
MSTRG.242	ACOC_0000026501-mRNA-1	483	Reference transcript
MSTRG.243	ACOC_0000026601-mRNA-1	315	Reference transcript
MSTRG.244	MSTRG.244.1	228	Novel transcript
MSTRG.245	MSTRG.245.1	2427	Novel transcript variant
MSTRG.245	ACOC_0000026701-mRNA-1	2439	Reference transcript variant
MSTRG.246	ACOC_0000026801-mRNA-1	972	Reference transcript
MSTRG.248	MSTRG.248.1	2214	Novel transcript variant
MSTRG.248	MSTRG.248.2	2280	Novel transcript variant
MSTRG.249	MSTRG.249.1	366	Novel transcript
MSTRG.250	MSTRG.250.1	1014	Novel transcript variant
MSTRG.250	MSTRG.250.2	1131	Novel transcript variant
MSTRG.250	ACOC_0000027001-mRNA-1	918	Reference transcript variant
MSTRG.251	ACOC_0000027101-mRNA-1	216	Reference transcript
MSTRG.252	MSTRG.252.1	879	Novel transcript variant
MSTRG.252	ACOC_0000027201-mRNA-1	819	Reference transcript variant
ACOC_0000027301	ACOC_0000027301-mRNA-1	225	Reference transcript
MSTRG.253	ACOC_0000027401-mRNA-1	723	Reference transcript variant
MSTRG.253	MSTRG.253.1	936	Novel transcript variant
MSTRG.254	MSTRG.254.1	1083	Novel transcript variant
MSTRG.254	ACOC_0000027501-mRNA-1	1170	Reference transcript variant
MSTRG.255	ACOC_0000027601-mRNA-1	546	Split transcript
MSTRG.255	MSTRG.255.1	894	Merged transcript
MSTRG.255	ACOC_0000027701-mRNA-1	339	Split transcript
MSTRG.256	ACOC_0000027801-mRNA-1	468	Reference transcript
MSTRG.257	ACOC_0000027901-mRNA-1	3312	Reference transcript variant
MSTRG.257	MSTRG.257.3	705	Novel transcript variant
MSTRG.258	MSTRG.258.1	3693	Merged transcript
MSTRG.259	ACOC_0000028101-mRNA-1	2022	Reference transcript variant
MSTRG.259	MSTRG.259.2	387	Novel transcript variant
MSTRG.258	ACOC_0000028201-mRNA-1	753	Split transcript
MSTRG.260	MSTRG.260.1	2922	Merged transcript
MSTRG.260	MSTRG.260.2	3066	Merged transcript
MSTRG.260	ACOC_0000028301-mRNA-1	864	Split transcript
MSTRG.260	ACOC_0000028401-mRNA-1	2658	Split transcript
MSTRG.260	MSTRG.260.5	990	Merged transcript
MSTRG.261	MSTRG.261.1	2367	Novel transcript variant
MSTRG.261	MSTRG.261.2	2472	Novel transcript variant
MSTRG.261	ACOC_0000028501-mRNA-1	1935	Reference transcript variant
MSTRG.262	MSTRG.262.1	780	Novel transcript variant
MSTRG.262	ACOC_0000028601-mRNA-1	2169	Reference transcript variant
MSTRG.262	MSTRG.262.3	1827	Novel transcript variant
MSTRG.263	MSTRG.263.1	648	Novel transcript variant
MSTRG.264	MSTRG.264.1	1476	Novel transcript variant
MSTRG.264	ACOC_0000028801-mRNA-1	1440	Reference transcript variant
MSTRG.265	MSTRG.265.1	534	Novel transcript
MSTRG.266	MSTRG.266.1	477	Novel transcript variant
MSTRG.266	MSTRG.266.2	534	Novel transcript variant
MSTRG.267	ACOC_0000029001-mRNA-1	411	Reference transcript
MSTRG.268	ACOC_0000029101-mRNA-1	984	Reference transcript
MSTRG.269	MSTRG.269.1	654	Novel transcript
MSTRG.270	MSTRG.270.1	591	Novel transcript
MSTRG.271	MSTRG.271.1	996	Novel transcript variant
MSTRG.271	ACOC_0000029201-mRNA-1	471	Reference transcript variant
MSTRG.272	MSTRG.272.1	1989	Novel transcript variant
MSTRG.273	MSTRG.273.1	456	Novel transcript
MSTRG.274	MSTRG.274.1	213	Novel transcript
MSTRG.275	MSTRG.275.1	1692	Novel transcript variant
ACOC_0000029501	ACOC_0000029501-mRNA-1	201	Reference transcript
MSTRG.276	MSTRG.276.1	372	Novel transcript
MSTRG.277	MSTRG.277.1	1050	Merged transcript
MSTRG.277	ACOC_0000029701-mRNA-1	582	Split transcript
MSTRG.278	MSTRG.278.1	966	Novel transcript variant
MSTRG.278	ACOC_0000029801-mRNA-1	894	Reference transcript variant
MSTRG.279	MSTRG.279.1	1137	Novel transcript variant
MSTRG.279	MSTRG.279.2	1140	Novel transcript variant
MSTRG.279	MSTRG.279.3	1293	Novel transcript variant
MSTRG.280	ACOC_0000030001-mRNA-1	1140	Split transcript
MSTRG.280	MSTRG.280.2	2970	Merged transcript
MSTRG.281	MSTRG.281.1	1167	Novel transcript variant
MSTRG.281	MSTRG.281.2	1197	Novel transcript variant
MSTRG.281	ACOC_0000030201-mRNA-1	999	Reference transcript variant
MSTRG.282	ACOC_0000030301-mRNA-1	2757	Reference transcript variant
MSTRG.282	MSTRG.282.2	2127	Novel transcript variant
MSTRG.283	MSTRG.283.1	2646	Novel transcript variant
MSTRG.283	ACOC_0000030401-mRNA-1	2283	Reference transcript variant
MSTRG.284	ACOC_0000030501-mRNA-1	1575	Reference transcript variant
MSTRG.284	MSTRG.284.1	1683	Novel transcript variant
MSTRG.285	MSTRG.285.1	1977	Novel transcript variant
MSTRG.285	ACOC_0000030601-mRNA-1	2028	Reference transcript variant
MSTRG.286	ACOC_0000030701-mRNA-1	888	Reference transcript
MSTRG.287	ACOC_0000030801-mRNA-1	255	Reference transcript
MSTRG.288	MSTRG.288.2	1134	Novel transcript variant
MSTRG.289	MSTRG.289.1	351	Novel transcript
MSTRG.290	ACOC_0000031001-mRNA-1	1878	Reference transcript variant
MSTRG.290	MSTRG.290.3	1065	Novel transcript variant
MSTRG.291	MSTRG.291.1	240	Novel transcript
MSTRG.292	MSTRG.292.1	1281	Novel transcript variant
MSTRG.292	ACOC_0000031101-mRNA-1	1263	Reference transcript variant
MSTRG.293	MSTRG.293.1	1194	Merged transcript
MSTRG.293	MSTRG.293.2	1290	Merged transcript
MSTRG.293	ACOC_0000031301-mRNA-1	729	Split transcript
MSTRG.294	MSTRG.294.1	1383	Novel transcript variant
MSTRG.294	ACOC_0000031401-mRNA-1	1137	Reference transcript variant
MSTRG.295	MSTRG.295.1	6297	Merged transcript
MSTRG.295	MSTRG.295.2	6306	Merged transcript
MSTRG.295	ACOC_0000031501-mRNA-1	294	Split transcript
MSTRG.295	ACOC_0000031601-mRNA-1	3054	Split transcript
MSTRG.296	MSTRG.296.2	486	Novel transcript variant
MSTRG.297	MSTRG.297.1	4818	Novel transcript variant
MSTRG.297	MSTRG.297.2	4824	Novel transcript variant
MSTRG.297	ACOC_0000031801-mRNA-1	4797	Reference transcript variant
MSTRG.298	MSTRG.298.1	3099	Merged transcript
MSTRG.298	MSTRG.298.2	3195	Merged transcript
MSTRG.298	ACOC_0000032001-mRNA-1	390	Split transcript
MSTRG.299	MSTRG.299.1	447	Novel transcript
MSTRG.300	ACOC_0000032101-mRNA-1	711	Reference transcript variant
MSTRG.300	MSTRG.300.1	717	Novel transcript variant
MSTRG.301	MSTRG.301.1	7233	Novel transcript variant
MSTRG.302	MSTRG.302.1	609	Novel transcript
MSTRG.303	MSTRG.303.1	270	Novel transcript
MSTRG.304	ACOC_0000032301-mRNA-1	426	Reference transcript
MSTRG.305	ACOC_0000032401-mRNA-1	1257	Split transcript
MSTRG.305	MSTRG.305.2	3360	Merged transcript
MSTRG.306	ACOC_0000032601-mRNA-1	246	Reference transcript
MSTRG.305	MSTRG.305.5	201	Merged transcript
MSTRG.307	MSTRG.307.1	2190	Novel transcript variant
MSTRG.307	ACOC_0000032801-mRNA-1	1938	Reference transcript variant
MSTRG.308	MSTRG.308.1	450	Novel transcript variant
MSTRG.308	ACOC_0000032901-mRNA-1	417	Reference transcript variant
MSTRG.309	ACOC_0000033001-mRNA-1	357	Reference transcript
MSTRG.310	MSTRG.310.1	1047	Novel transcript variant
MSTRG.310	MSTRG.310.2	696	Novel transcript variant
MSTRG.310	MSTRG.310.3	702	Novel transcript variant
MSTRG.310	ACOC_0000033101-mRNA-1	243	Reference transcript variant
MSTRG.311	MSTRG.311.1	1242	Novel transcript variant
MSTRG.312	MSTRG.312.1	1014	Merged transcript
MSTRG.313	MSTRG.313.1	1248	Novel transcript variant
MSTRG.314	MSTRG.314.1	591	Novel transcript variant
MSTRG.315	ACOC_0000033601-mRNA-1	375	Reference transcript
MSTRG.314	MSTRG.314.2	471	Novel transcript variant
MSTRG.314	ACOC_0000033701-mRNA-1	447	Reference transcript variant
MSTRG.316	ACOC_0000033901-mRNA-1	1230	Split transcript
MSTRG.316	MSTRG.316.4	294	Merged transcript
MSTRG.317	MSTRG.317.1	864	Novel transcript variant
MSTRG.318	MSTRG.318.1	1077	Novel transcript variant
MSTRG.318	MSTRG.318.2	1104	Novel transcript variant
MSTRG.319	MSTRG.319.1	252	Novel transcript
MSTRG.321	MSTRG.321.1	852	Novel transcript variant
MSTRG.322	MSTRG.322.1	1182	Novel transcript variant
MSTRG.322	MSTRG.322.2	2142	Novel transcript variant
MSTRG.322	ACOC_0000034401-mRNA-1	1521	Reference transcript variant
MSTRG.322	MSTRG.322.4	1020	Novel transcript variant
MSTRG.323	MSTRG.323.1	273	Novel transcript
MSTRG.324	ACOC_0000034501-mRNA-1	1782	Reference transcript variant
MSTRG.324	MSTRG.324.1	2241	Novel transcript variant
MSTRG.325	ACOC_0000034601-mRNA-1	414	Reference transcript
MSTRG.326	MSTRG.326.1	411	Novel transcript
MSTRG.327	MSTRG.327.1	1452	Novel transcript variant
MSTRG.329	MSTRG.329.1	591	Novel transcript variant
MSTRG.330	MSTRG.330.1	1242	Novel transcript variant
MSTRG.330	MSTRG.330.3	885	Novel transcript variant
MSTRG.331	ACOC_0000035201-mRNA-1	360	Reference transcript variant
MSTRG.332	MSTRG.332.1	432	Novel transcript
MSTRG.333	MSTRG.333.1	603	Novel transcript
MSTRG.334	MSTRG.334.1	324	Novel transcript
MSTRG.335	MSTRG.335.1	2019	Novel transcript variant
MSTRG.335	MSTRG.335.2	1530	Novel transcript variant
MSTRG.336	MSTRG.336.1	1137	Novel transcript variant
MSTRG.337	ACOC_0000035501-mRNA-1	2247	Reference transcript variant
MSTRG.337	MSTRG.337.2	2922	Novel transcript variant
MSTRG.338	ACOC_0000035601-mRNA-1	828	Reference transcript variant
MSTRG.338	MSTRG.338.2	795	Novel transcript variant
MSTRG.339	ACOC_0000035701-mRNA-1	648	Reference transcript
MSTRG.340	MSTRG.340.1	231	Novel transcript
MSTRG.341	ACOC_0000035801-mRNA-1	1440	Reference transcript
MSTRG.342	MSTRG.342.1	1266	Novel transcript variant
MSTRG.342	ACOC_0000035901-mRNA-1	1173	Reference transcript variant
MSTRG.343	MSTRG.343.2	1503	Merged transcript
MSTRG.343	ACOC_0000036101-mRNA-1	507	Split transcript
MSTRG.344	ACOC_0000036201-mRNA-1	477	Reference transcript
MSTRG.345	ACOC_0000036301-mRNA-1	630	Reference transcript variant
MSTRG.345	MSTRG.345.1	690	Novel transcript variant
MSTRG.346	ACOC_0000036501-mRNA-1	2955	Split transcript
MSTRG.346	MSTRG.346.4	3768	Merged transcript
MSTRG.348	MSTRG.348.1	1335	Novel transcript variant
MSTRG.348	ACOC_0000036701-mRNA-1	813	Reference transcript variant
MSTRG.349	MSTRG.349.1	891	Novel transcript variant
MSTRG.349	ACOC_0000036801-mRNA-1	834	Reference transcript variant
MSTRG.350	MSTRG.350.1	969	Novel transcript
ACOC_0000036901	ACOC_0000036901-mRNA-1	261	Reference transcript
MSTRG.351	MSTRG.351.1	357	Novel transcript
MSTRG.352	MSTRG.352.1	2799	Novel transcript variant
MSTRG.352	ACOC_0000037001-mRNA-1	2457	Reference transcript variant
MSTRG.353	ACOC_0000037101-mRNA-1	714	Reference transcript variant
MSTRG.354	ACOC_0000037201-mRNA-1	1125	Reference transcript variant
MSTRG.354	MSTRG.354.1	1479	Novel transcript variant
MSTRG.355	ACOC_0000037301-mRNA-1	1254	Reference transcript variant
MSTRG.355	MSTRG.355.1	1785	Novel transcript variant
MSTRG.356	MSTRG.356.1	1197	Novel transcript
MSTRG.357	MSTRG.357.1	4395	Novel transcript variant
MSTRG.357	ACOC_0000037401-mRNA-1	4191	Reference transcript variant
MSTRG.358	MSTRG.358.1	324	Novel transcript variant
MSTRG.358	ACOC_0000037501-mRNA-1	522	Reference transcript variant
MSTRG.359	MSTRG.359.1	1026	Novel transcript variant
MSTRG.360	MSTRG.360.1	207	Novel transcript
MSTRG.361	ACOC_0000037701-mRNA-1	858	Reference transcript
MSTRG.362	MSTRG.362.1	1689	Novel transcript variant
MSTRG.362	ACOC_0000037801-mRNA-1	1410	Reference transcript variant
MSTRG.364	MSTRG.364.1	2568	Novel transcript variant
MSTRG.364	MSTRG.364.2	2667	Novel transcript variant
MSTRG.365	MSTRG.365.1	720	Novel transcript variant
MSTRG.365	MSTRG.365.2	537	Novel transcript variant
MSTRG.367	MSTRG.367.1	399	Novel transcript variant
MSTRG.367	ACOC_0000038401-mRNA-1	345	Reference transcript variant
MSTRG.368	MSTRG.368.1	309	Novel transcript
MSTRG.369	MSTRG.369.1	972	Novel transcript variant
MSTRG.369	ACOC_0000038501-mRNA-1	762	Reference transcript variant
MSTRG.370	MSTRG.370.1	1137	Novel transcript variant
MSTRG.371	MSTRG.371.1	516	Novel transcript variant
MSTRG.372	ACOC_0000038801-mRNA-1	1932	Reference transcript variant
MSTRG.372	MSTRG.372.2	2541	Novel transcript variant
MSTRG.372	MSTRG.372.3	2610	Novel transcript variant
MSTRG.373	MSTRG.373.1	798	Novel transcript variant
MSTRG.373	ACOC_0000038901-mRNA-1	519	Reference transcript variant
MSTRG.374	ACOC_0000039001-mRNA-1	642	Reference transcript
MSTRG.375	ACOC_0000039101-mRNA-1	486	Reference transcript variant
MSTRG.375	MSTRG.375.1	528	Novel transcript variant
ACOC_0000039201	ACOC_0000039201-mRNA-1	423	Reference transcript
ACOC_0000039301	ACOC_0000039301-mRNA-1	729	Reference transcript
MSTRG.376	ACOC_0000039401-mRNA-1	546	Reference transcript
MSTRG.377	MSTRG.377.1	1254	Novel transcript variant
MSTRG.377	MSTRG.377.2	1278	Novel transcript variant
MSTRG.377	ACOC_0000039501-mRNA-1	1194	Reference transcript variant
ACOC_0000039601	ACOC_0000039601-mRNA-1	378	Reference transcript
MSTRG.378	ACOC_0000039701-mRNA-1	405	Reference transcript
MSTRG.379	MSTRG.379.1	249	Novel transcript
MSTRG.380	MSTRG.380.1	768	Novel transcript variant
MSTRG.381	MSTRG.381.1	285	Novel transcript
MSTRG.382	ACOC_0000039901-mRNA-1	2319	Split transcript
MSTRG.382	MSTRG.382.2	4161	Merged transcript
MSTRG.382	ACOC_0000040001-mRNA-1	1494	Split transcript
MSTRG.383	ACOC_0000040101-mRNA-1	390	Reference transcript
ACOC_0000040201	ACOC_0000040201-mRNA-1	495	Reference transcript
MSTRG.384	MSTRG.384.1	858	Novel transcript variant
MSTRG.384	MSTRG.384.2	834	Novel transcript variant
ACOC_0000040401	ACOC_0000040401-mRNA-1	474	Reference transcript
ACOC_0000040501	ACOC_0000040501-mRNA-1	624	Reference transcript
MSTRG.385	MSTRG.385.1	474	Novel transcript variant
MSTRG.386	MSTRG.386.1	1020	Novel transcript variant
MSTRG.388	ACOC_0000040901-mRNA-1	669	Reference transcript variant
MSTRG.388	MSTRG.388.1	732	Novel transcript variant
MSTRG.389	MSTRG.389.1	1662	Novel transcript variant
MSTRG.390	MSTRG.390.1	3078	Novel transcript variant
MSTRG.390	MSTRG.390.2	3090	Novel transcript variant
MSTRG.390	ACOC_0000041101-mRNA-1	1746	Reference transcript variant
MSTRG.391	MSTRG.391.3	2454	Novel transcript variant
MSTRG.392	MSTRG.392.1	996	Novel transcript variant
MSTRG.393	MSTRG.393.1	861	Novel transcript variant
MSTRG.393	ACOC_0000041501-mRNA-1	813	Reference transcript variant
MSTRG.394	ACOC_0000041601-mRNA-1	624	Split transcript
MSTRG.394	MSTRG.394.1	1287	Merged transcript
MSTRG.395	ACOC_0000041801-mRNA-1	540	Split transcript
MSTRG.395	MSTRG.395.2	1377	Merged transcript
MSTRG.395	MSTRG.395.3	657	Merged transcript
MSTRG.396	MSTRG.396.1	1236	Novel transcript variant
MSTRG.396	ACOC_0000042001-mRNA-1	855	Reference transcript variant
MSTRG.397	ACOC_0000042101-mRNA-1	1119	Split transcript
MSTRG.397	MSTRG.397.2	2190	Merged transcript
MSTRG.397	MSTRG.397.3	2184	Merged transcript
ACOC_0000042301	ACOC_0000042301-mRNA-1	381	Reference transcript
MSTRG.398	MSTRG.398.3	2031	Merged transcript
MSTRG.399	MSTRG.399.1	1302	Novel transcript variant
MSTRG.399	ACOC_0000042601-mRNA-1	1191	Reference transcript variant
ACOC_0000042701	ACOC_0000042701-mRNA-1	372	Reference transcript
MSTRG.400	MSTRG.400.1	1299	Novel transcript variant
MSTRG.400	ACOC_0000042801-mRNA-1	1362	Reference transcript variant
ACOC_0000042901	ACOC_0000042901-mRNA-1	630	Reference transcript
ACOC_0000043001	ACOC_0000043001-mRNA-1	249	Reference transcript
MSTRG.401	ACOC_0000043101-mRNA-1	426	Reference transcript variant
MSTRG.401	MSTRG.401.2	225	Novel transcript variant
MSTRG.402	ACOC_0000043201-mRNA-1	591	Reference transcript variant
MSTRG.402	MSTRG.402.1	753	Novel transcript variant
MSTRG.402	MSTRG.402.2	786	Novel transcript variant
MSTRG.403	MSTRG.403.1	1272	Novel transcript variant
MSTRG.404	ACOC_0000043401-mRNA-1	1050	Reference transcript variant
MSTRG.404	MSTRG.404.1	1326	Novel transcript variant
MSTRG.405	MSTRG.405.1	1086	Novel transcript variant
MSTRG.406	MSTRG.406.1	237	Novel transcript
MSTRG.406	MSTRG.406.2	246	Novel transcript
MSTRG.407	ACOC_0000043601-mRNA-1	1233	Reference transcript
MSTRG.408	ACOC_0000043701-mRNA-1	1194	Reference transcript variant
MSTRG.408	MSTRG.408.1	1134	Novel transcript variant
MSTRG.409	MSTRG.409.1	228	Novel transcript
MSTRG.410	ACOC_0000043801-mRNA-1	942	Reference transcript variant
MSTRG.411	ACOC_0000043901-mRNA-1	999	Reference transcript
MSTRG.412	ACOC_0000044001-mRNA-1	1233	Reference transcript variant
MSTRG.412	MSTRG.412.1	1578	Novel transcript variant
MSTRG.413	MSTRG.413.1	534	Novel transcript variant
MSTRG.413	ACOC_0000044101-mRNA-1	447	Reference transcript variant
MSTRG.414	MSTRG.414.1	450	Novel transcript
MSTRG.415	ACOC_0000044201-mRNA-1	471	Reference transcript
MSTRG.416	ACOC_0000044301-mRNA-1	1458	Reference transcript variant
MSTRG.416	MSTRG.416.1	1623	Novel transcript variant
MSTRG.417	MSTRG.417.3	243	Novel transcript variant
MSTRG.419	ACOC_0000044501-mRNA-1	417	Reference transcript
MSTRG.420	ACOC_0000044601-mRNA-1	516	Split transcript
MSTRG.420	MSTRG.420.1	1203	Merged transcript
MSTRG.420	MSTRG.420.3	402	Merged transcript
MSTRG.420	ACOC_0000044701-mRNA-1	315	Split transcript
ACOC_0000044801	ACOC_0000044801-mRNA-1	285	Reference transcript
MSTRG.421	MSTRG.421.1	780	Merged transcript
MSTRG.421	ACOC_0000045001-mRNA-1	387	Split transcript
MSTRG.422	MSTRG.422.1	1011	Novel transcript variant
MSTRG.422	ACOC_0000045101-mRNA-1	960	Reference transcript variant
MSTRG.423	MSTRG.423.1	915	Novel transcript variant
MSTRG.423	MSTRG.423.2	927	Novel transcript variant
MSTRG.423	MSTRG.423.3	1068	Novel transcript variant
MSTRG.423	ACOC_0000045201-mRNA-1	648	Reference transcript variant
MSTRG.424	MSTRG.424.1	531	Novel transcript
MSTRG.426	MSTRG.426.1	2967	Novel transcript variant
MSTRG.427	ACOC_0000045301-mRNA-1	105	Reference transcript
MSTRG.428	ACOC_0000045501-mRNA-1	918	Reference transcript variant
MSTRG.428	MSTRG.428.1	1023	Novel transcript variant
ACOC_0000045601	ACOC_0000045601-mRNA-1	234	Reference transcript
MSTRG.429	MSTRG.429.1	4344	Merged transcript
MSTRG.430	ACOC_0000045901-mRNA-1	651	Reference transcript
MSTRG.431	ACOC_0000046001-mRNA-1	1182	Split transcript
MSTRG.431	MSTRG.431.1	2382	Merged transcript
MSTRG.431	ACOC_0000046101-mRNA-1	762	Split transcript
MSTRG.431	ACOC_0000046201-mRNA-1	336	Split transcript
MSTRG.432	MSTRG.432.1	1410	Novel transcript variant
MSTRG.433	MSTRG.433.1	1419	Novel transcript variant
MSTRG.434	MSTRG.434.1	2295	Novel transcript variant
MSTRG.436	MSTRG.436.1	504	Novel transcript variant
MSTRG.436	ACOC_0000046701-mRNA-1	543	Reference transcript variant
MSTRG.437	ACOC_0000046801-mRNA-1	2190	Reference transcript
MSTRG.438	MSTRG.438.1	1248	Novel transcript variant
ACOC_0000047001	ACOC_0000047001-mRNA-1	204	Reference transcript
MSTRG.439	MSTRG.439.1	261	Novel transcript variant
MSTRG.440	MSTRG.440.1	5823	Novel transcript variant
MSTRG.440	ACOC_0000047201-mRNA-1	5862	Reference transcript variant
MSTRG.441	MSTRG.441.1	336	Novel transcript variant
MSTRG.441	MSTRG.441.2	1941	Novel transcript variant
MSTRG.441	MSTRG.441.4	1662	Novel transcript variant
MSTRG.442	ACOC_0000047401-mRNA-1	1854	Reference transcript
MSTRG.443	ACOC_0000047501-mRNA-1	1305	Reference transcript variant
MSTRG.443	MSTRG.443.2	945	Novel transcript variant
MSTRG.444	ACOC_0000047601-mRNA-1	510	Split transcript
MSTRG.444	MSTRG.444.1	1299	Merged transcript
MSTRG.445	MSTRG.445.2	3216	Novel transcript variant
MSTRG.445	MSTRG.445.3	3264	Novel transcript variant
MSTRG.445	MSTRG.445.1	4260	Novel transcript variant
MSTRG.445	ACOC_0000047801-mRNA-1	1161	Reference transcript variant
MSTRG.446	MSTRG.446.1	1233	Novel transcript
MSTRG.447	ACOC_0000047901-mRNA-1	1107	Reference transcript
MSTRG.448	MSTRG.448.1	819	Novel transcript variant
MSTRG.449	MSTRG.449.1	246	Novel transcript variant
MSTRG.450	MSTRG.450.1	2187	Novel transcript variant
MSTRG.450	MSTRG.450.2	2235	Novel transcript variant
MSTRG.451	ACOC_0000048401-mRNA-1	1323	Reference transcript variant
MSTRG.451	MSTRG.451.1	1341	Novel transcript variant
MSTRG.452	ACOC_0000048501-mRNA-1	3714	Reference transcript variant
ACOC_0000048601	ACOC_0000048601-mRNA-1	699	Reference transcript
MSTRG.453	MSTRG.453.1	1308	Novel transcript variant
MSTRG.453	ACOC_0000048701-mRNA-1	1329	Reference transcript variant
MSTRG.454	ACOC_0000048801-mRNA-1	804	Reference transcript variant
MSTRG.454	MSTRG.454.1	1032	Novel transcript variant
MSTRG.455	MSTRG.455.1	1380	Novel transcript variant
MSTRG.455	ACOC_0000048901-mRNA-1	1401	Reference transcript variant
MSTRG.456	MSTRG.456.1	279	Novel transcript variant
MSTRG.456	ACOC_0000049001-mRNA-1	315	Reference transcript variant
ACOC_0000049101	ACOC_0000049101-mRNA-1	297	Reference transcript
MSTRG.457	MSTRG.457.1	3192	Novel transcript variant
MSTRG.458	ACOC_0000049301-mRNA-1	1647	Reference transcript variant
MSTRG.458	MSTRG.458.1	1803	Novel transcript variant
MSTRG.459	MSTRG.459.1	255	Novel transcript
MSTRG.460	MSTRG.460.1	1137	Novel transcript variant
MSTRG.460	ACOC_0000049401-mRNA-1	900	Reference transcript variant
MSTRG.461	ACOC_0000049501-mRNA-1	1296	Reference transcript
MSTRG.462	ACOC_0000049601-mRNA-1	1380	Reference transcript variant
MSTRG.462	MSTRG.462.2	1125	Novel transcript variant
MSTRG.463	MSTRG.463.1	621	Merged transcript
MSTRG.463	ACOC_0000049801-mRNA-1	330	Split transcript
ACOC_0000049901	ACOC_0000049901-mRNA-1	210	Reference transcript
MSTRG.464	MSTRG.464.1	1200	Novel transcript variant
MSTRG.464	MSTRG.464.2	1320	Novel transcript variant
MSTRG.464	ACOC_0000050001-mRNA-1	1188	Reference transcript variant
MSTRG.465	MSTRG.465.1	936	Novel transcript
MSTRG.466	ACOC_0000050101-mRNA-1	2562	Reference transcript variant
MSTRG.466	MSTRG.466.1	2553	Novel transcript variant
MSTRG.466	MSTRG.466.2	2547	Novel transcript variant
MSTRG.467	MSTRG.467.1	1797	Novel transcript variant
MSTRG.468	ACOC_0000050301-mRNA-1	960	Reference transcript variant
MSTRG.468	MSTRG.468.1	1032	Novel transcript variant
MSTRG.469	MSTRG.469.1	1470	Novel transcript variant
MSTRG.469	ACOC_0000050401-mRNA-1	1260	Reference transcript variant
MSTRG.470	MSTRG.470.1	1695	Novel transcript variant
MSTRG.470	MSTRG.470.2	1704	Novel transcript variant
MSTRG.471	MSTRG.471.1	477	Novel transcript
MSTRG.472	ACOC_0000050601-mRNA-1	1218	Reference transcript variant
MSTRG.473	ACOC_0000050701-mRNA-1	465	Reference transcript
MSTRG.474	MSTRG.474.1	231	Novel transcript
MSTRG.472	MSTRG.472.3	1431	Novel transcript variant
MSTRG.475	MSTRG.475.1	609	Novel transcript
MSTRG.475	MSTRG.475.2	534	Novel transcript
MSTRG.476	MSTRG.476.1	1905	Novel transcript variant
MSTRG.477	MSTRG.477.1	1389	Novel transcript variant
MSTRG.477	ACOC_0000050901-mRNA-1	1188	Reference transcript variant
MSTRG.478	MSTRG.478.1	1380	Novel transcript variant
MSTRG.478	MSTRG.478.2	1500	Novel transcript variant
MSTRG.478	ACOC_0000051001-mRNA-1	783	Reference transcript variant
MSTRG.479	MSTRG.479.1	2235	Novel transcript variant
MSTRG.479	ACOC_0000051101-mRNA-1	1788	Reference transcript variant
MSTRG.480	ACOC_0000051201-mRNA-1	2838	Reference transcript variant
MSTRG.480	MSTRG.480.2	2985	Novel transcript variant
MSTRG.481	ACOC_0000051301-mRNA-1	3111	Reference transcript variant
MSTRG.481	MSTRG.481.1	3327	Novel transcript variant
MSTRG.482	MSTRG.482.1	5757	Novel transcript variant
MSTRG.484	MSTRG.484.1	1017	Novel transcript
MSTRG.485	MSTRG.485.1	1386	Novel transcript variant
MSTRG.485	ACOC_0000051501-mRNA-1	1383	Reference transcript variant
MSTRG.486	ACOC_0000051601-mRNA-1	432	Reference transcript
MSTRG.487	MSTRG.487.1	1026	Novel transcript variant
MSTRG.487	MSTRG.487.2	999	Novel transcript variant
MSTRG.487	ACOC_0000051701-mRNA-1	603	Reference transcript variant
MSTRG.488	MSTRG.488.1	5907	Merged transcript
MSTRG.488	ACOC_0000051801-mRNA-1	2634	Split transcript
MSTRG.489	ACOC_0000051901-mRNA-1	1074	Reference transcript
MSTRG.491	MSTRG.491.1	1158	Novel transcript variant
MSTRG.492	MSTRG.492.1	243	Novel transcript
MSTRG.493	ACOC_0000052301-mRNA-1	2307	Reference transcript variant
MSTRG.494	ACOC_0000052401-mRNA-1	237	Reference transcript variant
MSTRG.494	MSTRG.494.1	207	Novel transcript variant
MSTRG.495	MSTRG.495.1	1638	Novel transcript variant
MSTRG.496	ACOC_0000052601-mRNA-1	1458	Reference transcript
MSTRG.497	MSTRG.497.1	4626	Novel transcript variant
MSTRG.497	ACOC_0000052701-mRNA-1	4071	Reference transcript variant
MSTRG.498	MSTRG.498.1	2793	Novel transcript variant
MSTRG.499	MSTRG.499.1	1479	Novel transcript variant
MSTRG.499	ACOC_0000052901-mRNA-1	1281	Reference transcript variant
MSTRG.500	MSTRG.500.1	426	Novel transcript variant
MSTRG.500	ACOC_0000053001-mRNA-1	219	Reference transcript variant
MSTRG.501	MSTRG.501.1	744	Novel transcript variant
MSTRG.501	ACOC_0000053101-mRNA-1	633	Reference transcript variant
ACOC_0000053201	ACOC_0000053201-mRNA-1	387	Reference transcript
MSTRG.502	MSTRG.502.1	384	Novel transcript variant
MSTRG.502	ACOC_0000053301-mRNA-1	507	Reference transcript variant
MSTRG.503	ACOC_0000053401-mRNA-1	1869	Reference transcript variant
MSTRG.503	MSTRG.503.1	1833	Novel transcript variant
MSTRG.503	MSTRG.503.2	1893	Novel transcript variant
MSTRG.504	ACOC_0000053501-mRNA-1	1569	Reference transcript
MSTRG.505	MSTRG.505.1	1029	Novel transcript variant
MSTRG.506	ACOC_0000053601-mRNA-1	264	Reference transcript
MSTRG.505	ACOC_0000053701-mRNA-1	876	Reference transcript variant
MSTRG.507	ACOC_0000053801-mRNA-1	339	Reference transcript variant
MSTRG.507	MSTRG.507.1	264	Novel transcript variant
MSTRG.508	MSTRG.508.1	576	Novel transcript
MSTRG.509	ACOC_0000053901-mRNA-1	1113	Reference transcript variant
MSTRG.509	MSTRG.509.1	1179	Novel transcript variant
MSTRG.510	MSTRG.510.1	1680	Novel transcript variant
MSTRG.510	ACOC_0000054001-mRNA-1	1599	Reference transcript variant
MSTRG.511	MSTRG.511.1	966	Novel transcript variant
MSTRG.511	ACOC_0000054101-mRNA-1	993	Reference transcript variant
MSTRG.512	MSTRG.512.1	825	Novel transcript variant
MSTRG.512	ACOC_0000054201-mRNA-1	672	Reference transcript variant
MSTRG.513	MSTRG.513.1	693	Novel transcript variant
MSTRG.513	MSTRG.513.2	765	Novel transcript variant
MSTRG.513	ACOC_0000054301-mRNA-1	624	Reference transcript variant
MSTRG.513	MSTRG.513.4	252	Novel transcript variant
MSTRG.514	MSTRG.514.1	708	Novel transcript variant
MSTRG.514	ACOC_0000054401-mRNA-1	465	Reference transcript variant
MSTRG.515	MSTRG.515.1	1239	Novel transcript
MSTRG.516	MSTRG.516.1	3111	Novel transcript variant
MSTRG.516	ACOC_0000054501-mRNA-1	2574	Reference transcript variant
MSTRG.517	MSTRG.517.1	216	Novel transcript
MSTRG.518	MSTRG.518.1	867	Novel transcript variant
MSTRG.518	ACOC_0000054601-mRNA-1	726	Reference transcript variant
MSTRG.520	ACOC_0000054801-mRNA-1	825	Reference transcript variant
MSTRG.520	MSTRG.520.2	213	Novel transcript variant
ACOC_0000055001	ACOC_0000055001-mRNA-1	258	Reference transcript
ACOC_0000055101	ACOC_0000055101-mRNA-1	267	Reference transcript
MSTRG.521	MSTRG.521.1	1422	Novel transcript variant
MSTRG.521	ACOC_0000055201-mRNA-1	1623	Reference transcript variant
MSTRG.523	MSTRG.523.1	2403	Novel transcript variant
MSTRG.523	ACOC_0000055401-mRNA-1	2913	Reference transcript variant
MSTRG.524	ACOC_0000055501-mRNA-1	966	Reference transcript variant
MSTRG.524	MSTRG.524.1	714	Novel transcript variant
MSTRG.525	MSTRG.525.1	831	Novel transcript variant
MSTRG.525	ACOC_0000055601-mRNA-1	960	Reference transcript variant
MSTRG.526	MSTRG.526.1	1767	Novel transcript variant
MSTRG.526	MSTRG.526.2	1854	Novel transcript variant
MSTRG.526	ACOC_0000055701-mRNA-1	1350	Reference transcript variant
MSTRG.527	MSTRG.527.1	501	Novel transcript variant
MSTRG.527	ACOC_0000055801-mRNA-1	438	Reference transcript variant
MSTRG.528	MSTRG.528.1	1020	Novel transcript variant
MSTRG.528	ACOC_0000055901-mRNA-1	1176	Reference transcript variant
MSTRG.529	MSTRG.529.1	300	Novel transcript
MSTRG.530	MSTRG.530.1	4053	Merged transcript
MSTRG.530	ACOC_0000056001-mRNA-1	954	Split transcript
MSTRG.531	MSTRG.531.1	1632	Novel transcript variant
MSTRG.532	ACOC_0000056301-mRNA-1	546	Reference transcript
MSTRG.533	MSTRG.533.1	525	Novel transcript variant
MSTRG.533	ACOC_0000056401-mRNA-1	1674	Reference transcript variant
MSTRG.533	MSTRG.533.3	1458	Novel transcript variant
MSTRG.534	MSTRG.534.1	885	Novel transcript variant
MSTRG.534	ACOC_0000056501-mRNA-1	870	Reference transcript variant
MSTRG.535	ACOC_0000056601-mRNA-1	438	Reference transcript variant
MSTRG.535	MSTRG.535.1	603	Novel transcript variant
MSTRG.535	MSTRG.535.2	660	Novel transcript variant
MSTRG.536	ACOC_0000056701-mRNA-1	1506	Reference transcript variant
MSTRG.536	MSTRG.536.1	1380	Novel transcript variant
ACOC_0000056801	ACOC_0000056801-mRNA-1	474	Reference transcript
MSTRG.537	MSTRG.537.2	930	Merged transcript
MSTRG.537	MSTRG.537.1	4197	Merged transcript
MSTRG.537	ACOC_0000056901-mRNA-1	831	Split transcript
MSTRG.537	MSTRG.537.4	3228	Merged transcript
MSTRG.537	MSTRG.537.5	3213	Merged transcript
MSTRG.537	MSTRG.537.6	3303	Merged transcript
MSTRG.537	ACOC_0000057101-mRNA-1	609	Split transcript
MSTRG.538	MSTRG.538.1	1998	Novel transcript variant
MSTRG.538	ACOC_0000057201-mRNA-1	1731	Reference transcript variant
MSTRG.539	ACOC_0000057301-mRNA-1	132	Reference transcript
MSTRG.540	ACOC_0000057401-mRNA-1	12987	Reference transcript variant
MSTRG.540	MSTRG.540.7	11682	Novel transcript variant
MSTRG.541	MSTRG.541.1	708	Novel transcript variant
MSTRG.542	ACOC_0000057601-mRNA-1	954	Reference transcript variant
MSTRG.542	MSTRG.542.2	984	Novel transcript variant
MSTRG.543	MSTRG.543.1	1644	Novel transcript variant
MSTRG.543	ACOC_0000057701-mRNA-1	1086	Reference transcript variant
MSTRG.544	ACOC_0000057801-mRNA-1	744	Reference transcript
MSTRG.545	MSTRG.545.1	3405	Novel transcript variant
MSTRG.545	MSTRG.545.2	3537	Novel transcript variant
MSTRG.546	MSTRG.546.1	798	Novel transcript variant
MSTRG.546	ACOC_0000058001-mRNA-1	1371	Reference transcript variant
MSTRG.546	MSTRG.546.3	984	Novel transcript variant
MSTRG.547	MSTRG.547.1	1965	Novel transcript variant
MSTRG.547	ACOC_0000058101-mRNA-1	1770	Reference transcript variant
MSTRG.548	MSTRG.548.1	450	Novel transcript
MSTRG.549	ACOC_0000058201-mRNA-1	699	Reference transcript
ACOC_0000058301	ACOC_0000058301-mRNA-1	411	Reference transcript
MSTRG.550	MSTRG.550.1	1959	Novel transcript variant
MSTRG.550	ACOC_0000058401-mRNA-1	1662	Reference transcript variant
MSTRG.552	ACOC_0000058601-mRNA-1	657	Reference transcript variant
MSTRG.552	MSTRG.552.1	699	Novel transcript variant
MSTRG.552	MSTRG.552.2	654	Novel transcript variant
MSTRG.553	MSTRG.553.1	894	Merged transcript
MSTRG.554	ACOC_0000058701-mRNA-1	693	Reference transcript
MSTRG.553	ACOC_0000058801-mRNA-1	648	Split transcript
MSTRG.555	MSTRG.555.1	1326	Novel transcript variant
MSTRG.555	ACOC_0000059001-mRNA-1	1017	Reference transcript variant
MSTRG.556	ACOC_0000059101-mRNA-1	1521	Reference transcript variant
MSTRG.556	MSTRG.556.1	1653	Novel transcript variant
MSTRG.558	ACOC_0000059301-mRNA-1	489	Reference transcript variant
MSTRG.558	MSTRG.558.1	717	Novel transcript variant
MSTRG.559	ACOC_0000059401-mRNA-1	1710	Reference transcript variant
MSTRG.559	MSTRG.559.2	2004	Novel transcript variant
MSTRG.560	MSTRG.560.1	7299	Novel transcript variant
MSTRG.561	ACOC_0000059601-mRNA-1	279	Reference transcript
MSTRG.562	MSTRG.562.1	564	Novel transcript variant
MSTRG.563	MSTRG.563.1	939	Novel transcript variant
MSTRG.563	ACOC_0000059801-mRNA-1	891	Reference transcript variant
MSTRG.564	MSTRG.564.1	936	Novel transcript variant
MSTRG.565	ACOC_0000060001-mRNA-1	3171	Reference transcript variant
MSTRG.565	MSTRG.565.1	3543	Novel transcript variant
MSTRG.566	MSTRG.566.1	1314	Novel transcript variant
MSTRG.566	ACOC_0000060101-mRNA-1	1323	Reference transcript variant
MSTRG.567	MSTRG.567.1	537	Novel transcript
MSTRG.568	ACOC_0000060201-mRNA-1	429	Reference transcript
MSTRG.569	MSTRG.569.1	624	Novel transcript variant
MSTRG.569	ACOC_0000060301-mRNA-1	3735	Reference transcript variant
MSTRG.569	MSTRG.569.3	3462	Novel transcript variant
MSTRG.570	MSTRG.570.1	231	Novel transcript
MSTRG.571	MSTRG.571.1	549	Novel transcript variant
MSTRG.572	ACOC_0000060501-mRNA-1	255	Reference transcript
MSTRG.573	MSTRG.573.1	1785	Novel transcript variant
MSTRG.573	MSTRG.573.2	1824	Novel transcript variant
MSTRG.573	ACOC_0000060601-mRNA-1	1476	Reference transcript variant
MSTRG.574	MSTRG.574.1	3123	Novel transcript variant
MSTRG.574	ACOC_0000060701-mRNA-1	3501	Reference transcript variant
MSTRG.575	ACOC_0000060801-mRNA-1	810	Reference transcript
MSTRG.576	MSTRG.576.1	4335	Novel transcript variant
MSTRG.576	MSTRG.576.2	4350	Novel transcript variant
ACOC_0000061001	ACOC_0000061001-mRNA-1	252	Reference transcript
MSTRG.577	MSTRG.577.1	2187	Novel transcript variant
MSTRG.577	ACOC_0000061101-mRNA-1	3117	Reference transcript variant
MSTRG.577	MSTRG.577.2	3483	Novel transcript variant
MSTRG.577	MSTRG.577.3	3579	Novel transcript variant
MSTRG.578	MSTRG.578.1	3072	Novel transcript variant
MSTRG.578	ACOC_0000061201-mRNA-1	2202	Reference transcript variant
MSTRG.579	MSTRG.579.1	2220	Novel transcript variant
MSTRG.579	MSTRG.579.2	2211	Novel transcript variant
MSTRG.579	ACOC_0000061301-mRNA-1	2070	Reference transcript variant
MSTRG.580	MSTRG.580.1	582	Novel transcript variant
MSTRG.580	ACOC_0000061401-mRNA-1	630	Reference transcript variant
MSTRG.581	MSTRG.581.1	1176	Novel transcript variant
MSTRG.581	ACOC_0000061501-mRNA-1	552	Reference transcript variant
MSTRG.582	MSTRG.582.1	4608	Merged transcript
MSTRG.582	MSTRG.582.2	4566	Merged transcript
MSTRG.582	ACOC_0000061601-mRNA-1	1725	Split transcript
MSTRG.582	ACOC_0000061701-mRNA-1	1620	Split transcript
MSTRG.583	MSTRG.583.2	1608	Novel transcript variant
MSTRG.584	MSTRG.584.1	1473	Merged transcript
MSTRG.584	MSTRG.584.2	1482	Merged transcript
MSTRG.584	ACOC_0000062001-mRNA-1	264	Split transcript
MSTRG.585	MSTRG.585.1	396	Novel transcript
MSTRG.586	MSTRG.586.1	831	Novel transcript
MSTRG.587	MSTRG.587.1	2274	Novel transcript variant
MSTRG.588	MSTRG.588.1	936	Novel transcript variant
MSTRG.588	ACOC_0000062201-mRNA-1	864	Reference transcript variant
MSTRG.589	MSTRG.589.1	1113	Novel transcript variant
MSTRG.589	ACOC_0000062301-mRNA-1	921	Reference transcript variant
MSTRG.590	MSTRG.590.1	282	Novel transcript
MSTRG.591	ACOC_0000062401-mRNA-1	627	Split transcript
MSTRG.591	MSTRG.591.1	1089	Merged transcript
MSTRG.592	MSTRG.592.1	1527	Novel transcript variant
MSTRG.592	ACOC_0000062601-mRNA-1	1638	Reference transcript variant
MSTRG.593	MSTRG.593.1	255	Novel transcript
MSTRG.594	MSTRG.594.2	3186	Novel transcript variant
MSTRG.594	ACOC_0000062701-mRNA-1	3198	Reference transcript variant
MSTRG.594	MSTRG.594.1	3588	Novel transcript variant
MSTRG.594	MSTRG.594.4	573	Novel transcript variant
MSTRG.595	MSTRG.595.1	681	Novel transcript variant
MSTRG.596	MSTRG.596.1	1470	Novel transcript variant
MSTRG.596	MSTRG.596.2	1539	Novel transcript variant
MSTRG.596	ACOC_0000062901-mRNA-1	1263	Reference transcript variant
MSTRG.598	ACOC_0000063101-mRNA-1	300	Reference transcript
MSTRG.599	ACOC_0000063201-mRNA-1	582	Reference transcript
MSTRG.600	MSTRG.600.1	1104	Novel transcript variant
MSTRG.600	ACOC_0000063301-mRNA-1	651	Reference transcript variant
MSTRG.601	MSTRG.601.1	864	Novel transcript
MSTRG.602	MSTRG.602.1	306	Novel transcript variant
MSTRG.602	MSTRG.602.3	969	Novel transcript variant
ACOC_0000063501	ACOC_0000063501-mRNA-1	432	Reference transcript
MSTRG.603	MSTRG.603.1	1122	Novel transcript variant
MSTRG.603	ACOC_0000063601-mRNA-1	1149	Reference transcript variant
MSTRG.604	MSTRG.604.1	1338	Novel transcript
MSTRG.605	MSTRG.605.1	1638	Novel transcript variant
MSTRG.606	MSTRG.606.1	1290	Novel transcript variant
MSTRG.606	ACOC_0000063801-mRNA-1	621	Reference transcript variant
MSTRG.607	MSTRG.607.1	426	Novel transcript
MSTRG.608	ACOC_0000063901-mRNA-1	903	Reference transcript variant
MSTRG.608	MSTRG.608.1	966	Novel transcript variant
MSTRG.609	MSTRG.609.1	273	Novel transcript
ACOC_0000064101	ACOC_0000064101-mRNA-1	222	Reference transcript
MSTRG.610	MSTRG.610.3	2055	Novel transcript variant
MSTRG.610	ACOC_0000064201-mRNA-1	1260	Reference transcript variant
MSTRG.611	MSTRG.611.1	507	Novel transcript variant
MSTRG.611	MSTRG.611.2	483	Novel transcript variant
MSTRG.612	MSTRG.612.1	4794	Novel transcript variant
MSTRG.612	ACOC_0000064401-mRNA-1	4158	Reference transcript variant
MSTRG.613	ACOC_0000064501-mRNA-1	1338	Reference transcript
MSTRG.614	MSTRG.614.1	1380	Novel transcript variant
MSTRG.614	MSTRG.614.2	1395	Novel transcript variant
MSTRG.614	ACOC_0000064601-mRNA-1	1314	Reference transcript variant
MSTRG.615	MSTRG.615.1	2142	Novel transcript variant
MSTRG.617	MSTRG.617.1	315	Novel transcript
MSTRG.618	MSTRG.618.1	1788	Novel transcript variant
MSTRG.619	MSTRG.619.1	1152	Novel transcript variant
ACOC_0000065001	ACOC_0000065001-mRNA-1	543	Reference transcript
MSTRG.620	MSTRG.620.1	1422	Novel transcript variant
MSTRG.621	MSTRG.621.1	2061	Novel transcript variant
MSTRG.621	MSTRG.621.2	2157	Novel transcript variant
MSTRG.623	MSTRG.623.1	438	Novel transcript
MSTRG.622	MSTRG.622.3	543	Novel transcript variant
ACOC_0000065401	ACOC_0000065401-mRNA-1	606	Reference transcript
MSTRG.624	ACOC_0000065501-mRNA-1	798	Reference transcript
MSTRG.625	MSTRG.625.1	570	Novel transcript
ACOC_0000065601	ACOC_0000065601-mRNA-1	1005	Reference transcript
ACOC_0000065701	ACOC_0000065701-mRNA-1	993	Reference transcript
MSTRG.626	MSTRG.626.1	1140	Novel transcript variant
MSTRG.626	ACOC_0000065801-mRNA-1	933	Reference transcript variant
MSTRG.626	MSTRG.626.3	267	Novel transcript variant
MSTRG.627	ACOC_0000065901-mRNA-1	1521	Reference transcript variant
MSTRG.627	MSTRG.627.2	1641	Novel transcript variant
MSTRG.629	MSTRG.629.1	1566	Novel transcript variant
MSTRG.629	ACOC_0000066001-mRNA-1	1554	Reference transcript variant
MSTRG.630	ACOC_0000066101-mRNA-1	297	Reference transcript
MSTRG.632	ACOC_0000066301-mRNA-1	333	Reference transcript variant
MSTRG.632	MSTRG.632.1	378	Novel transcript variant
MSTRG.633	MSTRG.633.1	5865	Merged transcript
MSTRG.633	MSTRG.633.2	6183	Merged transcript
MSTRG.633	MSTRG.633.3	6195	Merged transcript
MSTRG.633	MSTRG.633.4	6228	Merged transcript
MSTRG.633	MSTRG.633.6	3999	Merged transcript
MSTRG.633	ACOC_0000066501-mRNA-1	3546	Split transcript
MSTRG.634	ACOC_0000066601-mRNA-1	687	Reference transcript
MSTRG.635	MSTRG.635.1	960	Novel transcript variant
MSTRG.635	ACOC_0000066701-mRNA-1	789	Reference transcript variant
MSTRG.636	MSTRG.636.1	1227	Novel transcript variant
MSTRG.636	MSTRG.636.2	1458	Novel transcript variant
MSTRG.636	MSTRG.636.3	1689	Novel transcript variant
MSTRG.636	ACOC_0000066801-mRNA-1	1455	Reference transcript variant
MSTRG.637	MSTRG.637.1	279	Novel transcript
MSTRG.638	ACOC_0000066901-mRNA-1	330	Reference transcript
MSTRG.639	MSTRG.639.1	3369	Novel transcript variant
MSTRG.640	MSTRG.640.1	1311	Novel transcript variant
MSTRG.640	ACOC_0000067101-mRNA-1	855	Reference transcript variant
MSTRG.641	MSTRG.641.1	1977	Novel transcript variant
MSTRG.641	ACOC_0000067201-mRNA-1	741	Reference transcript variant
MSTRG.642	MSTRG.642.1	1485	Novel transcript variant
MSTRG.642	MSTRG.642.2	1635	Novel transcript variant
MSTRG.642	MSTRG.642.4	1317	Novel transcript variant
MSTRG.644	MSTRG.644.2	1203	Novel transcript variant
MSTRG.645	ACOC_0000067601-mRNA-1	1932	Reference transcript variant
MSTRG.645	MSTRG.645.1	1875	Novel transcript variant
MSTRG.646	MSTRG.646.1	411	Novel transcript variant
MSTRG.646	ACOC_0000067701-mRNA-1	429	Reference transcript variant
MSTRG.647	ACOC_0000067801-mRNA-1	1653	Reference transcript variant
MSTRG.647	MSTRG.647.1	1848	Novel transcript variant
MSTRG.648	MSTRG.648.1	726	Novel transcript variant
MSTRG.648	ACOC_0000067901-mRNA-1	657	Reference transcript variant
MSTRG.649	MSTRG.649.1	915	Novel transcript variant
MSTRG.649	ACOC_0000068001-mRNA-1	936	Reference transcript variant
MSTRG.650	MSTRG.650.1	552	Novel transcript variant
MSTRG.650	ACOC_0000068101-mRNA-1	525	Reference transcript variant
MSTRG.652	MSTRG.652.1	966	Novel transcript variant
MSTRG.652	ACOC_0000068301-mRNA-1	825	Reference transcript variant
MSTRG.653	MSTRG.653.1	2310	Novel transcript
MSTRG.653	MSTRG.653.2	2592	Novel transcript
MSTRG.654	ACOC_0000068401-mRNA-1	810	Reference transcript variant
MSTRG.654	MSTRG.654.1	1362	Novel transcript variant
MSTRG.655	MSTRG.655.1	309	Novel transcript variant
MSTRG.655	ACOC_0000068501-mRNA-1	351	Reference transcript variant
MSTRG.656	MSTRG.656.1	1491	Novel transcript variant
MSTRG.656	ACOC_0000068601-mRNA-1	594	Reference transcript variant
MSTRG.657	ACOC_0000068701-mRNA-1	1308	Reference transcript variant
MSTRG.657	MSTRG.657.1	1308	Novel transcript variant
MSTRG.658	MSTRG.658.1	483	Novel transcript variant
MSTRG.658	ACOC_0000068801-mRNA-1	444	Reference transcript variant
MSTRG.659	MSTRG.659.1	231	Novel transcript
MSTRG.660	MSTRG.660.1	1365	Novel transcript variant
MSTRG.661	MSTRG.661.1	2487	Novel transcript variant
MSTRG.662	MSTRG.662.1	6336	Novel transcript variant
MSTRG.663	MSTRG.663.1	240	Novel transcript
ACOC_0000069201	ACOC_0000069201-mRNA-1	369	Reference transcript
MSTRG.664	MSTRG.664.1	798	Novel transcript variant
MSTRG.664	ACOC_0000069301-mRNA-1	375	Reference transcript variant
MSTRG.665	MSTRG.665.1	837	Novel transcript variant
MSTRG.665	MSTRG.665.3	489	Novel transcript variant
MSTRG.666	ACOC_0000069501-mRNA-1	1446	Reference transcript variant
MSTRG.666	MSTRG.666.1	1821	Novel transcript variant
MSTRG.667	ACOC_0000069601-mRNA-1	3486	Reference transcript variant
MSTRG.667	MSTRG.667.1	5229	Novel transcript variant
MSTRG.667	MSTRG.667.2	5274	Novel transcript variant
MSTRG.668	ACOC_0000069701-mRNA-1	912	Split transcript
MSTRG.668	MSTRG.668.1	1512	Merged transcript
MSTRG.668	ACOC_0000069801-mRNA-1	534	Split transcript
MSTRG.669	MSTRG.669.1	258	Novel transcript
MSTRG.670	MSTRG.670.1	783	Novel transcript variant
MSTRG.670	ACOC_0000069901-mRNA-1	693	Reference transcript variant
ACOC_0000070101	ACOC_0000070101-mRNA-1	627	Reference transcript
MSTRG.672	ACOC_0000070201-mRNA-1	1056	Reference transcript
MSTRG.673	MSTRG.673.1	345	Novel transcript variant
MSTRG.673	MSTRG.673.2	351	Novel transcript variant
MSTRG.674	MSTRG.674.2	1944	Merged transcript
MSTRG.674	ACOC_0000070501-mRNA-1	1107	Split transcript
MSTRG.675	MSTRG.675.1	1356	Novel transcript variant
MSTRG.675	ACOC_0000070601-mRNA-1	990	Reference transcript variant
MSTRG.676	MSTRG.676.1	1335	Novel transcript variant
MSTRG.676	MSTRG.676.2	1341	Novel transcript variant
MSTRG.676	MSTRG.676.3	1341	Novel transcript variant
MSTRG.676	ACOC_0000070701-mRNA-1	468	Reference transcript variant
MSTRG.677	MSTRG.677.1	537	Novel transcript variant
MSTRG.678	MSTRG.678.1	2580	Novel transcript variant
MSTRG.679	MSTRG.679.1	1311	Novel transcript variant
MSTRG.680	ACOC_0000071101-mRNA-1	609	Reference transcript
MSTRG.681	MSTRG.681.1	651	Novel transcript variant
MSTRG.682	MSTRG.682.1	3021	Merged transcript
MSTRG.682	ACOC_0000071301-mRNA-1	1992	Split transcript
MSTRG.684	ACOC_0000071501-mRNA-1	1563	Reference transcript variant
MSTRG.685	MSTRG.685.1	1920	Novel transcript variant
MSTRG.686	MSTRG.686.3	3555	Novel transcript variant
MSTRG.687	MSTRG.687.1	474	Novel transcript variant
MSTRG.687	MSTRG.687.2	333	Novel transcript variant
MSTRG.688	MSTRG.688.1	507	Novel transcript variant
MSTRG.688	ACOC_0000071901-mRNA-1	408	Reference transcript variant
MSTRG.689	MSTRG.689.1	534	Novel transcript
ACOC_0000072001	ACOC_0000072001-mRNA-1	669	Reference transcript
ACOC_0000072101	ACOC_0000072101-mRNA-1	873	Reference transcript
MSTRG.690	MSTRG.690.1	876	Merged transcript
MSTRG.691	MSTRG.691.1	909	Novel transcript variant
MSTRG.692	ACOC_0000072501-mRNA-1	957	Reference transcript variant
MSTRG.692	MSTRG.692.1	729	Novel transcript variant
MSTRG.693	ACOC_0000072601-mRNA-1	1302	Reference transcript variant
MSTRG.693	MSTRG.693.2	1221	Novel transcript variant
MSTRG.694	ACOC_0000072701-mRNA-1	246	Reference transcript variant
MSTRG.694	MSTRG.694.2	297	Novel transcript variant
MSTRG.695	MSTRG.695.1	1281	Novel transcript variant
MSTRG.695	ACOC_0000072801-mRNA-1	921	Reference transcript variant
MSTRG.696	ACOC_0000072901-mRNA-1	1350	Reference transcript variant
MSTRG.697	MSTRG.697.1	1440	Novel transcript variant
MSTRG.697	ACOC_0000073001-mRNA-1	951	Reference transcript variant
MSTRG.698	ACOC_0000073101-mRNA-1	537	Reference transcript variant
MSTRG.698	MSTRG.698.1	582	Novel transcript variant
MSTRG.699	MSTRG.699.1	1284	Novel transcript variant
MSTRG.700	MSTRG.700.1	288	Novel transcript
MSTRG.701	ACOC_0000073301-mRNA-1	1449	Reference transcript variant
MSTRG.701	MSTRG.701.3	1338	Novel transcript variant
ACOC_0000073401	ACOC_0000073401-mRNA-1	420	Reference transcript
MSTRG.702	ACOC_0000073501-mRNA-1	606	Reference transcript variant
MSTRG.704	MSTRG.704.1	3882	Novel transcript variant
MSTRG.704	ACOC_0000073701-mRNA-1	3753	Reference transcript variant
MSTRG.705	MSTRG.705.1	429	Novel transcript variant
MSTRG.705	MSTRG.705.2	321	Novel transcript variant
MSTRG.705	ACOC_0000073801-mRNA-1	438	Reference transcript variant
MSTRG.706	MSTRG.706.1	690	Novel transcript variant
MSTRG.706	ACOC_0000073901-mRNA-1	618	Reference transcript variant
MSTRG.707	ACOC_0000074001-mRNA-1	234	Reference transcript
MSTRG.708	MSTRG.708.1	1842	Novel transcript variant
MSTRG.708	ACOC_0000074101-mRNA-1	1485	Reference transcript variant
MSTRG.709	MSTRG.709.1	1899	Novel transcript variant
ACOC_0000074301	ACOC_0000074301-mRNA-1	279	Reference transcript
MSTRG.710	MSTRG.710.1	4053	Merged transcript
MSTRG.710	ACOC_0000074401-mRNA-1	2772	Split transcript
MSTRG.711	MSTRG.711.1	294	Novel transcript
MSTRG.712	ACOC_0000074601-mRNA-1	264	Reference transcript
MSTRG.713	MSTRG.713.1	912	Novel transcript variant
MSTRG.714	MSTRG.714.1	798	Novel transcript variant
MSTRG.714	ACOC_0000074801-mRNA-1	921	Reference transcript variant
MSTRG.715	ACOC_0000074901-mRNA-1	894	Reference transcript variant
MSTRG.715	MSTRG.715.1	1068	Novel transcript variant
MSTRG.716	ACOC_0000075001-mRNA-1	360	Reference transcript
ACOC_0000075101	ACOC_0000075101-mRNA-1	327	Reference transcript
MSTRG.717	MSTRG.717.1	372	Novel transcript variant
MSTRG.717	MSTRG.717.2	2610	Novel transcript variant
MSTRG.717	MSTRG.717.3	2733	Novel transcript variant
MSTRG.718	MSTRG.718.1	1164	Novel transcript variant
MSTRG.719	ACOC_0000075501-mRNA-1	663	Reference transcript variant
MSTRG.719	MSTRG.719.2	867	Novel transcript variant
MSTRG.720	MSTRG.720.1	564	Novel transcript
MSTRG.721	MSTRG.721.1	2274	Novel transcript variant
MSTRG.721	ACOC_0000075601-mRNA-1	2025	Reference transcript variant
MSTRG.722	MSTRG.722.1	753	Novel transcript variant
MSTRG.722	ACOC_0000075701-mRNA-1	651	Reference transcript variant
MSTRG.723	ACOC_0000075801-mRNA-1	684	Reference transcript variant
MSTRG.724	MSTRG.724.2	2814	Novel transcript variant
MSTRG.725	MSTRG.725.1	1341	Novel transcript variant
MSTRG.726	MSTRG.726.1	1125	Novel transcript variant
MSTRG.726	MSTRG.726.2	1155	Novel transcript variant
MSTRG.726	MSTRG.726.3	1215	Novel transcript variant
MSTRG.726	ACOC_0000076101-mRNA-1	813	Reference transcript variant
MSTRG.727	ACOC_0000076201-mRNA-1	288	Reference transcript
ACOC_0000076401	ACOC_0000076401-mRNA-1	333	Reference transcript
MSTRG.728	MSTRG.728.1	1095	Novel transcript variant
MSTRG.728	ACOC_0000076501-mRNA-1	1059	Reference transcript variant
MSTRG.729	MSTRG.729.1	720	Novel transcript
MSTRG.730	MSTRG.730.1	621	Merged transcript
MSTRG.730	ACOC_0000076601-mRNA-1	234	Split transcript
MSTRG.731	ACOC_0000076701-mRNA-1	327	Reference transcript
MSTRG.730	ACOC_0000076801-mRNA-1	591	Split transcript
MSTRG.732	MSTRG.732.1	1080	Novel transcript variant
MSTRG.732	MSTRG.732.2	1161	Novel transcript variant
MSTRG.733	MSTRG.733.1	855	Novel transcript variant
MSTRG.733	ACOC_0000077001-mRNA-1	834	Reference transcript variant
MSTRG.734	MSTRG.734.1	756	Novel transcript variant
MSTRG.734	ACOC_0000077101-mRNA-1	720	Reference transcript variant
MSTRG.735	MSTRG.735.1	939	Novel transcript variant
MSTRG.736	ACOC_0000077301-mRNA-1	318	Split transcript
MSTRG.736	MSTRG.736.1	588	Merged transcript
MSTRG.736	MSTRG.736.4	798	Merged transcript
MSTRG.738	MSTRG.738.1	1473	Novel transcript
ACOC_0000077601	ACOC_0000077601-mRNA-1	1635	Reference transcript
MSTRG.739	MSTRG.739.1	1164	Novel transcript variant
MSTRG.739	ACOC_0000077701-mRNA-1	1014	Reference transcript variant
MSTRG.740	MSTRG.740.1	846	Novel transcript variant
MSTRG.740	ACOC_0000077801-mRNA-1	774	Reference transcript variant
MSTRG.741	ACOC_0000077901-mRNA-1	942	Reference transcript variant
MSTRG.741	MSTRG.741.1	774	Novel transcript variant
ACOC_0000078001	ACOC_0000078001-mRNA-1	360	Reference transcript
MSTRG.742	MSTRG.742.1	936	Novel transcript
MSTRG.743	MSTRG.743.1	1425	Novel transcript variant
MSTRG.744	MSTRG.744.1	954	Novel transcript variant
MSTRG.744	ACOC_0000078201-mRNA-1	1236	Reference transcript variant
MSTRG.745	ACOC_0000078301-mRNA-1	216	Reference transcript variant
MSTRG.745	MSTRG.745.1	303	Novel transcript variant
MSTRG.746	MSTRG.746.2	933	Novel transcript variant
MSTRG.747	MSTRG.747.1	993	Merged transcript
MSTRG.747	ACOC_0000078601-mRNA-1	279	Split transcript
MSTRG.748	ACOC_0000078701-mRNA-1	573	Reference transcript
MSTRG.749	MSTRG.749.1	537	Novel transcript variant
MSTRG.749	ACOC_0000078801-mRNA-1	555	Reference transcript variant
MSTRG.750	MSTRG.750.1	2046	Merged transcript
MSTRG.750	ACOC_0000079001-mRNA-1	852	Split transcript
MSTRG.751	ACOC_0000079101-mRNA-1	2838	Reference transcript variant
MSTRG.751	MSTRG.751.1	2799	Novel transcript variant
MSTRG.752	MSTRG.752.1	897	Novel transcript variant
MSTRG.753	MSTRG.753.1	1161	Novel transcript variant
MSTRG.754	ACOC_0000079401-mRNA-1	330	Reference transcript
MSTRG.755	ACOC_0000079501-mRNA-1	234	Reference transcript
MSTRG.756	MSTRG.756.1	1875	Novel transcript variant
MSTRG.756	ACOC_0000079601-mRNA-1	1884	Reference transcript variant
MSTRG.757	MSTRG.757.1	2151	Novel transcript variant
MSTRG.757	MSTRG.757.2	2157	Novel transcript variant
MSTRG.758	MSTRG.758.1	1506	Novel transcript variant
MSTRG.758	ACOC_0000079801-mRNA-1	930	Reference transcript variant
MSTRG.759	ACOC_0000079901-mRNA-1	1044	Reference transcript variant
MSTRG.759	MSTRG.759.1	1671	Novel transcript variant
MSTRG.760	MSTRG.760.3	849	Novel transcript variant
MSTRG.761	MSTRG.761.1	1698	Novel transcript variant
MSTRG.762	ACOC_0000080201-mRNA-1	1140	Reference transcript
ACOC_0000080301	ACOC_0000080301-mRNA-1	390	Reference transcript
MSTRG.763	MSTRG.763.1	1173	Novel transcript variant
MSTRG.763	ACOC_0000080401-mRNA-1	951	Reference transcript variant
MSTRG.764	ACOC_0000080501-mRNA-1	519	Reference transcript variant
MSTRG.764	MSTRG.764.1	534	Novel transcript variant
MSTRG.765	ACOC_0000080601-mRNA-1	651	Reference transcript variant
MSTRG.765	MSTRG.765.1	1113	Novel transcript variant
MSTRG.766	ACOC_0000080701-mRNA-1	1152	Split transcript
MSTRG.766	MSTRG.766.1	4608	Merged transcript
MSTRG.766	ACOC_0000080801-mRNA-1	1242	Split transcript
MSTRG.767	MSTRG.767.1	1674	Novel transcript variant
MSTRG.767	ACOC_0000081001-mRNA-1	1236	Reference transcript variant
MSTRG.769	ACOC_0000081301-mRNA-1	5364	Split transcript
MSTRG.769	MSTRG.769.1	7599	Merged transcript
MSTRG.769	MSTRG.769.2	7623	Merged transcript
MSTRG.769	MSTRG.769.4	2955	Merged transcript
MSTRG.770	MSTRG.770.2	762	Novel transcript variant
MSTRG.770	ACOC_0000081501-mRNA-1	513	Reference transcript variant
MSTRG.770	MSTRG.770.1	705	Novel transcript variant
MSTRG.771	ACOC_0000081601-mRNA-1	795	Reference transcript variant
MSTRG.772	ACOC_0000081701-mRNA-1	1803	Reference transcript variant
MSTRG.772	MSTRG.772.1	2181	Novel transcript variant
MSTRG.773	MSTRG.773.1	984	Novel transcript variant
MSTRG.773	MSTRG.773.2	843	Novel transcript variant
MSTRG.773	ACOC_0000081801-mRNA-1	675	Reference transcript variant
MSTRG.774	ACOC_0000081901-mRNA-1	261	Reference transcript
MSTRG.775	ACOC_0000082001-mRNA-1	684	Split transcript
MSTRG.775	MSTRG.775.1	2544	Merged transcript
MSTRG.775	ACOC_0000082101-mRNA-1	1437	Split transcript
MSTRG.775	ACOC_0000082201-mRNA-1	726	Split transcript
MSTRG.776	ACOC_0000082301-mRNA-1	2013	Reference transcript
MSTRG.777	ACOC_0000082401-mRNA-1	867	Reference transcript variant
MSTRG.777	MSTRG.777.1	852	Novel transcript variant
MSTRG.779	ACOC_0000082601-mRNA-1	702	Reference transcript
MSTRG.778	ACOC_0000082701-mRNA-1	1692	Split transcript
MSTRG.780	ACOC_0000082901-mRNA-1	393	Reference transcript
MSTRG.778	MSTRG.778.5	4236	Merged transcript
MSTRG.778	ACOC_0000083101-mRNA-1	174	Split transcript
MSTRG.778	ACOC_0000083201-mRNA-1	2178	Split transcript
MSTRG.781	MSTRG.781.1	1239	Novel transcript
ACOC_0000083301	ACOC_0000083301-mRNA-1	336	Reference transcript
MSTRG.782	MSTRG.782.1	2526	Novel transcript variant
MSTRG.783	MSTRG.783.1	792	Novel transcript variant
MSTRG.784	ACOC_0000083601-mRNA-1	2367	Split transcript
MSTRG.784	MSTRG.784.1	2862	Merged transcript
MSTRG.785	MSTRG.785.1	1212	Novel transcript variant
MSTRG.784	ACOC_0000083801-mRNA-1	288	Split transcript
MSTRG.784	MSTRG.784.3	465	Merged transcript
MSTRG.784	ACOC_0000083901-mRNA-1	195	Split transcript
MSTRG.786	MSTRG.786.1	723	Novel transcript variant
MSTRG.786	ACOC_0000084001-mRNA-1	342	Reference transcript variant
MSTRG.787	ACOC_0000084101-mRNA-1	1215	Reference transcript
MSTRG.788	MSTRG.788.1	858	Novel transcript variant
MSTRG.789	MSTRG.789.1	1833	Novel transcript variant
MSTRG.790	ACOC_0000084401-mRNA-1	1107	Reference transcript variant
MSTRG.790	MSTRG.790.1	1533	Novel transcript variant
MSTRG.791	ACOC_0000084501-mRNA-1	945	Reference transcript variant
MSTRG.791	MSTRG.791.2	2007	Novel transcript variant
ACOC_0000084601	ACOC_0000084601-mRNA-1	465	Reference transcript
MSTRG.792	MSTRG.792.1	282	Novel transcript
MSTRG.793	MSTRG.793.1	1344	Novel transcript variant
MSTRG.793	ACOC_0000084701-mRNA-1	1110	Reference transcript variant
MSTRG.794	MSTRG.794.1	450	Novel transcript variant
MSTRG.795	MSTRG.795.1	630	Merged transcript
MSTRG.795	MSTRG.795.2	816	Merged transcript
MSTRG.795	ACOC_0000084901-mRNA-1	330	Split transcript
MSTRG.795	MSTRG.795.4	786	Merged transcript
MSTRG.796	ACOC_0000085101-mRNA-1	2391	Reference transcript variant
MSTRG.797	MSTRG.797.1	2007	Novel transcript variant
MSTRG.797	ACOC_0000085201-mRNA-1	1113	Reference transcript variant
MSTRG.798	MSTRG.798.1	1140	Novel transcript
MSTRG.799	MSTRG.799.1	1050	Novel transcript variant
MSTRG.799	ACOC_0000085301-mRNA-1	771	Reference transcript variant
MSTRG.800	ACOC_0000085401-mRNA-1	1005	Reference transcript variant
MSTRG.800	MSTRG.800.2	612	Novel transcript variant
MSTRG.801	MSTRG.801.1	714	Novel transcript
MSTRG.802	MSTRG.802.1	1005	Novel transcript variant
MSTRG.803	ACOC_0000085601-mRNA-1	1233	Reference transcript
MSTRG.804	MSTRG.804.1	2388	Novel transcript variant
MSTRG.804	MSTRG.804.2	2325	Novel transcript variant
MSTRG.805	MSTRG.805.1	1458	Novel transcript variant
MSTRG.806	ACOC_0000085901-mRNA-1	1302	Reference transcript
MSTRG.808	MSTRG.808.1	312	Novel transcript
MSTRG.811	MSTRG.811.1	432	Novel transcript variant
MSTRG.811	MSTRG.811.2	525	Novel transcript variant
MSTRG.812	MSTRG.812.1	591	Novel transcript variant
MSTRG.812	MSTRG.812.2	594	Novel transcript variant
MSTRG.812	ACOC_0000086401-mRNA-1	405	Reference transcript variant
ACOC_0000086501	ACOC_0000086501-mRNA-1	252	Reference transcript
MSTRG.814	MSTRG.814.1	4167	Novel transcript variant
MSTRG.814	MSTRG.814.2	4239	Novel transcript variant
MSTRG.814	ACOC_0000086701-mRNA-1	4113	Reference transcript variant
ACOC_0000086801	ACOC_0000086801-mRNA-1	363	Reference transcript
MSTRG.815	MSTRG.815.1	2484	Novel transcript variant
MSTRG.815	ACOC_0000086901-mRNA-1	1815	Reference transcript variant
MSTRG.816	MSTRG.816.1	5166	Novel transcript variant
MSTRG.816	ACOC_0000087001-mRNA-1	5205	Reference transcript variant
MSTRG.817	ACOC_0000087101-mRNA-1	423	Split transcript
MSTRG.817	MSTRG.817.2	3405	Merged transcript
MSTRG.817	ACOC_0000087201-mRNA-1	3048	Split transcript
MSTRG.818	MSTRG.818.1	936	Novel transcript variant
MSTRG.819	ACOC_0000087401-mRNA-1	5046	Reference transcript variant
MSTRG.819	MSTRG.819.1	5043	Novel transcript variant
ACOC_0000087501	ACOC_0000087501-mRNA-1	390	Reference transcript
MSTRG.820	MSTRG.820.1	2961	Novel transcript variant
MSTRG.820	MSTRG.820.2	2970	Novel transcript variant
MSTRG.820	ACOC_0000087601-mRNA-1	1677	Reference transcript variant
MSTRG.822	MSTRG.822.1	924	Novel transcript
MSTRG.823	MSTRG.823.1	1062	Novel transcript variant
MSTRG.823	ACOC_0000087801-mRNA-1	1131	Reference transcript variant
MSTRG.824	MSTRG.824.1	1185	Novel transcript
MSTRG.824	MSTRG.824.2	1248	Novel transcript
MSTRG.825	MSTRG.825.1	324	Novel transcript variant
MSTRG.825	ACOC_0000087901-mRNA-1	264	Reference transcript variant
MSTRG.826	ACOC_0000088001-mRNA-1	294	Reference transcript
MSTRG.827	MSTRG.827.1	348	Novel transcript variant
MSTRG.827	ACOC_0000088101-mRNA-1	309	Reference transcript variant
ACOC_0000088201	ACOC_0000088201-mRNA-1	378	Reference transcript
MSTRG.828	ACOC_0000088301-mRNA-1	978	Reference transcript variant
MSTRG.829	MSTRG.829.1	705	Novel transcript
MSTRG.830	MSTRG.830.1	381	Novel transcript
MSTRG.831	ACOC_0000088401-mRNA-1	513	Reference transcript variant
MSTRG.831	MSTRG.831.2	468	Novel transcript variant
MSTRG.832	MSTRG.832.1	1701	Novel transcript variant
MSTRG.832	ACOC_0000088501-mRNA-1	1692	Reference transcript variant
MSTRG.833	ACOC_0000088601-mRNA-1	1335	Reference transcript
MSTRG.835	MSTRG.835.1	1230	Novel transcript variant
MSTRG.835	ACOC_0000088701-mRNA-1	1158	Reference transcript variant
MSTRG.837	MSTRG.837.1	606	Novel transcript variant
MSTRG.838	MSTRG.838.1	1539	Novel transcript variant
MSTRG.839	ACOC_0000089001-mRNA-1	474	Reference transcript variant
MSTRG.839	MSTRG.839.1	465	Novel transcript variant
MSTRG.840	MSTRG.840.1	4758	Merged transcript
MSTRG.840	MSTRG.840.3	3189	Merged transcript
MSTRG.841	ACOC_0000089301-mRNA-1	1122	Reference transcript variant
MSTRG.841	MSTRG.841.2	948	Novel transcript variant
MSTRG.842	MSTRG.842.1	330	Novel transcript variant
MSTRG.842	ACOC_0000089401-mRNA-1	348	Reference transcript variant
MSTRG.843	MSTRG.843.1	984	Novel transcript variant
MSTRG.843	ACOC_0000089501-mRNA-1	1038	Reference transcript variant
MSTRG.844	MSTRG.844.1	1557	Novel transcript variant
MSTRG.844	ACOC_0000089601-mRNA-1	1416	Reference transcript variant
MSTRG.845	MSTRG.845.1	402	Novel transcript
MSTRG.846	MSTRG.846.1	1083	Novel transcript
MSTRG.846	MSTRG.846.2	1113	Novel transcript
MSTRG.847	MSTRG.847.1	2919	Novel transcript variant
MSTRG.847	ACOC_0000089701-mRNA-1	2586	Reference transcript variant
ACOC_0000089801	ACOC_0000089801-mRNA-1	228	Reference transcript
MSTRG.848	MSTRG.848.1	327	Novel transcript
MSTRG.848	MSTRG.848.2	414	Novel transcript
MSTRG.850	MSTRG.850.1	1080	Novel transcript variant
MSTRG.850	ACOC_0000090001-mRNA-1	396	Reference transcript variant
MSTRG.851	ACOC_0000090101-mRNA-1	567	Reference transcript
MSTRG.852	ACOC_0000090201-mRNA-1	1587	Reference transcript
MSTRG.853	MSTRG.853.1	1047	Novel transcript variant
MSTRG.853	ACOC_0000090301-mRNA-1	1176	Reference transcript variant
MSTRG.854	MSTRG.854.1	903	Novel transcript variant
MSTRG.854	ACOC_0000090401-mRNA-1	792	Reference transcript variant
MSTRG.855	MSTRG.855.1	1257	Novel transcript variant
MSTRG.856	MSTRG.856.1	486	Novel transcript variant
MSTRG.856	ACOC_0000090601-mRNA-1	462	Reference transcript variant
MSTRG.857	MSTRG.857.1	453	Novel transcript variant
MSTRG.857	ACOC_0000090701-mRNA-1	285	Reference transcript variant
MSTRG.858	ACOC_0000090801-mRNA-1	1113	Reference transcript variant
MSTRG.858	MSTRG.858.1	1122	Novel transcript variant
MSTRG.859	MSTRG.859.1	318	Novel transcript
MSTRG.860	MSTRG.860.1	678	Novel transcript variant
MSTRG.860	ACOC_0000090901-mRNA-1	402	Reference transcript variant
MSTRG.862	ACOC_0000091101-mRNA-1	1056	Reference transcript variant
MSTRG.863	MSTRG.863.1	468	Novel transcript variant
MSTRG.863	ACOC_0000091201-mRNA-1	456	Reference transcript variant
MSTRG.864	MSTRG.864.1	1890	Novel transcript variant
MSTRG.864	ACOC_0000091301-mRNA-1	1419	Reference transcript variant
MSTRG.865	MSTRG.865.1	675	Novel transcript variant
MSTRG.866	MSTRG.866.1	1017	Novel transcript variant
MSTRG.866	ACOC_0000091501-mRNA-1	795	Reference transcript variant
MSTRG.867	MSTRG.867.1	2124	Novel transcript
MSTRG.868	MSTRG.868.1	1635	Novel transcript variant
MSTRG.868	MSTRG.868.2	1629	Novel transcript variant
MSTRG.868	ACOC_0000091601-mRNA-1	1392	Reference transcript variant
MSTRG.868	MSTRG.868.4	1101	Novel transcript variant
MSTRG.869	ACOC_0000091701-mRNA-1	408	Reference transcript
ACOC_0000091801	ACOC_0000091801-mRNA-1	240	Reference transcript
MSTRG.870	MSTRG.870.3	1881	Merged transcript
MSTRG.870	ACOC_0000092001-mRNA-1	279	Split transcript
MSTRG.871	ACOC_0000092101-mRNA-1	1929	Reference transcript variant
MSTRG.871	MSTRG.871.1	2640	Novel transcript variant
MSTRG.872	MSTRG.872.1	1413	Novel transcript variant
MSTRG.872	ACOC_0000092201-mRNA-1	747	Reference transcript variant
MSTRG.873	ACOC_0000092301-mRNA-1	804	Reference transcript variant
MSTRG.873	MSTRG.873.1	1098	Novel transcript variant
MSTRG.874	MSTRG.874.1	1332	Novel transcript variant
MSTRG.874	MSTRG.874.3	1002	Novel transcript variant
ACOC_0000092501	ACOC_0000092501-mRNA-1	300	Reference transcript
MSTRG.875	ACOC_0000092601-mRNA-1	210	Reference transcript variant
MSTRG.876	ACOC_0000092701-mRNA-1	1383	Reference transcript variant
MSTRG.876	MSTRG.876.1	1353	Novel transcript variant
MSTRG.877	ACOC_0000092801-mRNA-1	459	Reference transcript
ACOC_0000092901	ACOC_0000092901-mRNA-1	321	Reference transcript
MSTRG.878	MSTRG.878.1	1845	Novel transcript variant
MSTRG.878	ACOC_0000093001-mRNA-1	1413	Reference transcript variant
MSTRG.879	MSTRG.879.1	2067	Novel transcript variant
MSTRG.880	MSTRG.880.1	726	Novel transcript variant
MSTRG.880	ACOC_0000093201-mRNA-1	681	Reference transcript variant
MSTRG.881	ACOC_0000093301-mRNA-1	594	Reference transcript
MSTRG.882	MSTRG.882.1	1512	Novel transcript variant
MSTRG.883	MSTRG.883.1	483	Novel transcript variant
MSTRG.884	MSTRG.884.1	2262	Novel transcript variant
MSTRG.885	ACOC_0000093701-mRNA-1	876	Reference transcript
MSTRG.886	MSTRG.886.1	2475	Novel transcript variant
MSTRG.886	MSTRG.886.3	615	Novel transcript variant
MSTRG.887	MSTRG.887.1	327	Novel transcript variant
MSTRG.887	ACOC_0000093901-mRNA-1	435	Reference transcript variant
ACOC_0000094001	ACOC_0000094001-mRNA-1	330	Reference transcript
MSTRG.888	ACOC_0000094101-mRNA-1	1539	Reference transcript variant
MSTRG.889	MSTRG.889.1	804	Novel transcript variant
MSTRG.888	MSTRG.888.2	888	Novel transcript variant
MSTRG.890	ACOC_0000094301-mRNA-1	393	Reference transcript
MSTRG.891	ACOC_0000094401-mRNA-1	405	Reference transcript variant
MSTRG.891	MSTRG.891.2	1020	Novel transcript variant
MSTRG.892	ACOC_0000094501-mRNA-1	549	Reference transcript
MSTRG.893	MSTRG.893.1	1329	Novel transcript variant
MSTRG.893	ACOC_0000094601-mRNA-1	1206	Reference transcript variant
MSTRG.894	MSTRG.894.1	276	Novel transcript
MSTRG.895	MSTRG.895.1	204	Novel transcript
MSTRG.896	ACOC_0000094701-mRNA-1	600	Reference transcript variant
MSTRG.896	MSTRG.896.1	1059	Novel transcript variant
MSTRG.897	ACOC_0000094801-mRNA-1	1221	Reference transcript variant
MSTRG.897	MSTRG.897.2	1119	Novel transcript variant
MSTRG.898	MSTRG.898.1	1611	Merged transcript
MSTRG.898	ACOC_0000095001-mRNA-1	657	Split transcript
MSTRG.899	MSTRG.899.1	2619	Novel transcript variant
MSTRG.900	MSTRG.900.1	597	Novel transcript variant
MSTRG.900	ACOC_0000095201-mRNA-1	609	Reference transcript variant
MSTRG.901	ACOC_0000095301-mRNA-1	1098	Reference transcript variant
MSTRG.901	MSTRG.901.2	285	Novel transcript variant
ACOC_0000095401	ACOC_0000095401-mRNA-1	372	Reference transcript
MSTRG.902	MSTRG.902.1	2472	Novel transcript variant
MSTRG.902	MSTRG.902.2	2493	Novel transcript variant
MSTRG.902	ACOC_0000095501-mRNA-1	2274	Reference transcript variant
MSTRG.904	ACOC_0000095801-mRNA-1	1095	Reference transcript
MSTRG.905	MSTRG.905.1	1131	Novel transcript variant
MSTRG.905	MSTRG.905.2	1368	Novel transcript variant
MSTRG.906	MSTRG.906.1	1437	Novel transcript variant
MSTRG.906	MSTRG.906.2	1428	Novel transcript variant
MSTRG.907	ACOC_0000096101-mRNA-1	903	Reference transcript variant
MSTRG.907	MSTRG.907.2	1005	Novel transcript variant
MSTRG.908	MSTRG.908.1	1533	Novel transcript variant
MSTRG.909	MSTRG.909.1	2364	Novel transcript variant
MSTRG.909	ACOC_0000096301-mRNA-1	1638	Reference transcript variant
MSTRG.910	ACOC_0000096401-mRNA-1	1008	Reference transcript variant
MSTRG.910	MSTRG.910.1	984	Novel transcript variant
MSTRG.911	MSTRG.911.1	1467	Novel transcript variant
MSTRG.911	MSTRG.911.2	1470	Novel transcript variant
MSTRG.911	ACOC_0000096501-mRNA-1	1065	Reference transcript variant
MSTRG.912	ACOC_0000096601-mRNA-1	927	Split transcript
MSTRG.912	MSTRG.912.1	3480	Merged transcript
MSTRG.912	MSTRG.912.2	3549	Merged transcript
ACOC_0000096801	ACOC_0000096801-mRNA-1	300	Reference transcript
MSTRG.913	MSTRG.913.1	513	Novel transcript variant
MSTRG.913	ACOC_0000096901-mRNA-1	423	Reference transcript variant
MSTRG.914	MSTRG.914.1	273	Novel transcript
MSTRG.915	MSTRG.915.1	564	Novel transcript variant
MSTRG.915	ACOC_0000097001-mRNA-1	777	Reference transcript variant
MSTRG.915	MSTRG.915.3	525	Novel transcript variant
MSTRG.916	ACOC_0000097101-mRNA-1	1305	Reference transcript variant
MSTRG.917	MSTRG.917.1	2577	Novel transcript variant
MSTRG.917	ACOC_0000097201-mRNA-1	1815	Reference transcript variant
MSTRG.918	MSTRG.918.1	426	Novel transcript
MSTRG.919	ACOC_0000097301-mRNA-1	969	Reference transcript variant
MSTRG.919	MSTRG.919.1	1158	Novel transcript variant
MSTRG.920	MSTRG.920.1	438	Novel transcript variant
MSTRG.922	MSTRG.922.1	2301	Novel transcript variant
MSTRG.922	MSTRG.922.2	1971	Novel transcript variant
MSTRG.922	ACOC_0000097601-mRNA-1	1695	Reference transcript variant
MSTRG.923	ACOC_0000097701-mRNA-1	348	Split transcript
MSTRG.923	MSTRG.923.1	654	Merged transcript
MSTRG.923	MSTRG.923.2	765	Merged transcript
MSTRG.923	MSTRG.923.3	810	Merged transcript
MSTRG.923	ACOC_0000097801-mRNA-1	597	Split transcript
MSTRG.924	MSTRG.924.1	1590	Novel transcript variant
MSTRG.925	MSTRG.925.1	6021	Novel transcript variant
MSTRG.925	MSTRG.925.2	6033	Novel transcript variant
MSTRG.925	ACOC_0000098001-mRNA-1	4551	Reference transcript variant
MSTRG.926	ACOC_0000098101-mRNA-1	546	Reference transcript
MSTRG.929	MSTRG.929.1	522	Novel transcript variant
MSTRG.930	MSTRG.930.1	1722	Novel transcript variant
MSTRG.930	MSTRG.930.2	1746	Novel transcript variant
MSTRG.931	MSTRG.931.1	2160	Merged transcript
MSTRG.931	MSTRG.931.2	2136	Merged transcript
MSTRG.931	ACOC_0000098601-mRNA-1	708	Split transcript
MSTRG.932	MSTRG.932.1	4269	Novel transcript variant
MSTRG.933	MSTRG.933.1	1275	Novel transcript variant
MSTRG.933	ACOC_0000098901-mRNA-1	675	Reference transcript variant
MSTRG.934	MSTRG.934.1	279	Novel transcript
MSTRG.935	MSTRG.935.1	1122	Novel transcript variant
MSTRG.935	MSTRG.935.2	1116	Novel transcript variant
MSTRG.935	ACOC_0000099001-mRNA-1	816	Reference transcript variant
MSTRG.936	MSTRG.936.1	780	Novel transcript variant
MSTRG.937	ACOC_0000099201-mRNA-1	972	Reference transcript
MSTRG.938	MSTRG.938.1	990	Novel transcript variant
MSTRG.939	MSTRG.939.2	1809	Novel transcript variant
MSTRG.940	ACOC_0000099501-mRNA-1	1098	Reference transcript variant
MSTRG.940	MSTRG.940.3	402	Novel transcript variant
MSTRG.941	MSTRG.941.1	1788	Novel transcript variant
MSTRG.941	ACOC_0000099601-mRNA-1	1800	Reference transcript variant
MSTRG.943	MSTRG.943.1	675	Novel transcript
MSTRG.944	ACOC_0000099801-mRNA-1	228	Reference transcript
MSTRG.945	ACOC_0000099901-mRNA-1	528	Reference transcript
MSTRG.946	ACOC_0000100001-mRNA-1	2670	Reference transcript variant
MSTRG.946	MSTRG.946.1	2745	Novel transcript variant
MSTRG.947	ACOC_0000100101-mRNA-1	1572	Reference transcript variant
MSTRG.947	MSTRG.947.1	1785	Novel transcript variant
MSTRG.947	MSTRG.947.2	1839	Novel transcript variant
MSTRG.948	ACOC_0000100301-mRNA-1	1611	Split transcript
MSTRG.948	MSTRG.948.1	2094	Merged transcript
MSTRG.948	ACOC_0000100401-mRNA-1	375	Split transcript
MSTRG.949	ACOC_0000100501-mRNA-1	822	Reference transcript variant
MSTRG.950	MSTRG.950.1	726	Novel transcript variant
MSTRG.950	ACOC_0000100601-mRNA-1	480	Reference transcript variant
MSTRG.951	ACOC_0000100701-mRNA-1	3333	Reference transcript variant
MSTRG.951	MSTRG.951.2	417	Novel transcript variant
MSTRG.951	MSTRG.951.3	2430	Novel transcript variant
MSTRG.952	ACOC_0000100801-mRNA-1	816	Reference transcript variant
ACOC_0000100901	ACOC_0000100901-mRNA-1	273	Reference transcript
MSTRG.953	ACOC_0000101001-mRNA-1	2499	Reference transcript variant
MSTRG.953	MSTRG.953.2	2298	Novel transcript variant
MSTRG.953	MSTRG.953.3	456	Novel transcript variant
MSTRG.954	MSTRG.954.1	405	Novel transcript variant
MSTRG.954	ACOC_0000101101-mRNA-1	141	Reference transcript variant
MSTRG.955	MSTRG.955.1	1083	Novel transcript variant
MSTRG.955	ACOC_0000101201-mRNA-1	969	Reference transcript variant
MSTRG.956	MSTRG.956.1	1251	Novel transcript variant
MSTRG.957	ACOC_0000101401-mRNA-1	1152	Reference transcript
MSTRG.958	MSTRG.958.1	300	Novel transcript variant
MSTRG.958	ACOC_0000101501-mRNA-1	759	Reference transcript variant
MSTRG.958	MSTRG.958.3	1674	Novel transcript variant
MSTRG.959	MSTRG.959.1	5610	Merged transcript
MSTRG.960	ACOC_0000101601-mRNA-1	243	Reference transcript
MSTRG.959	ACOC_0000101801-mRNA-1	888	Split transcript
MSTRG.961	MSTRG.961.1	1158	Novel transcript variant
MSTRG.961	ACOC_0000101901-mRNA-1	822	Reference transcript variant
MSTRG.962	ACOC_0000102001-mRNA-1	3156	Reference transcript variant
MSTRG.962	MSTRG.962.2	3942	Novel transcript variant
MSTRG.963	ACOC_0000102101-mRNA-1	288	Reference transcript variant
MSTRG.963	MSTRG.963.2	252	Novel transcript variant
MSTRG.964	MSTRG.964.1	1392	Novel transcript variant
MSTRG.965	ACOC_0000102301-mRNA-1	1167	Split transcript
MSTRG.965	MSTRG.965.2	4701	Merged transcript
MSTRG.966	MSTRG.966.1	342	Novel transcript variant
MSTRG.966	ACOC_0000102501-mRNA-1	375	Reference transcript variant
MSTRG.967	MSTRG.967.1	1821	Novel transcript variant
MSTRG.967	ACOC_0000102601-mRNA-1	1731	Reference transcript variant
MSTRG.967	MSTRG.967.3	561	Novel transcript variant
MSTRG.968	MSTRG.968.1	657	Novel transcript variant
MSTRG.968	ACOC_0000102701-mRNA-1	738	Reference transcript variant
MSTRG.969	MSTRG.969.2	1488	Novel transcript variant
MSTRG.970	MSTRG.970.1	2376	Merged transcript
ACOC_0000103101	ACOC_0000103101-mRNA-1	471	Reference transcript
MSTRG.971	ACOC_0000103201-mRNA-1	627	Reference transcript variant
MSTRG.971	MSTRG.971.1	534	Novel transcript variant
MSTRG.972	ACOC_0000103301-mRNA-1	1278	Reference transcript
MSTRG.973	ACOC_0000103401-mRNA-1	429	Reference transcript
MSTRG.974	ACOC_0000103501-mRNA-1	2088	Reference transcript variant
MSTRG.974	MSTRG.974.1	2232	Novel transcript variant
MSTRG.974	MSTRG.974.2	2409	Novel transcript variant
MSTRG.974	MSTRG.974.3	2286	Novel transcript variant
MSTRG.975	MSTRG.975.1	312	Novel transcript
MSTRG.976	MSTRG.976.1	789	Novel transcript variant
MSTRG.977	ACOC_0000103701-mRNA-1	444	Reference transcript variant
MSTRG.977	MSTRG.977.1	462	Novel transcript variant
MSTRG.978	MSTRG.978.1	465	Novel transcript variant
MSTRG.978	ACOC_0000103801-mRNA-1	330	Reference transcript variant
MSTRG.979	MSTRG.979.1	885	Novel transcript variant
MSTRG.979	MSTRG.979.2	807	Novel transcript variant
MSTRG.980	MSTRG.980.1	717	Novel transcript variant
MSTRG.980	ACOC_0000104001-mRNA-1	756	Reference transcript variant
MSTRG.981	ACOC_0000104101-mRNA-1	4092	Reference transcript variant
MSTRG.981	MSTRG.981.1	3648	Novel transcript variant
MSTRG.982	MSTRG.982.1	1230	Novel transcript variant
MSTRG.982	ACOC_0000104201-mRNA-1	660	Reference transcript variant
MSTRG.983	ACOC_0000104301-mRNA-1	843	Reference transcript
MSTRG.984	ACOC_0000104401-mRNA-1	750	Reference transcript variant
MSTRG.984	MSTRG.984.1	4191	Novel transcript variant
MSTRG.985	MSTRG.985.1	1119	Novel transcript
MSTRG.986	MSTRG.986.1	627	Novel transcript variant
MSTRG.986	ACOC_0000104501-mRNA-1	564	Reference transcript variant
MSTRG.987	MSTRG.987.1	1299	Novel transcript variant
MSTRG.988	ACOC_0000104701-mRNA-1	318	Split transcript
MSTRG.988	MSTRG.988.2	1182	Merged transcript
MSTRG.990	MSTRG.990.1	684	Novel transcript variant
MSTRG.991	MSTRG.991.1	1704	Novel transcript variant
MSTRG.991	MSTRG.991.2	1641	Novel transcript variant
MSTRG.991	ACOC_0000105101-mRNA-1	1512	Reference transcript variant
MSTRG.992	ACOC_0000105201-mRNA-1	1845	Reference transcript variant
MSTRG.992	MSTRG.992.1	1848	Novel transcript variant
MSTRG.993	MSTRG.993.1	1515	Novel transcript variant
MSTRG.993	ACOC_0000105301-mRNA-1	1458	Reference transcript variant
MSTRG.994	ACOC_0000105401-mRNA-1	648	Split transcript
MSTRG.994	MSTRG.994.1	609	Merged transcript
MSTRG.995	ACOC_0000105601-mRNA-1	426	Split transcript
MSTRG.995	ACOC_0000105701-mRNA-1	348	Split transcript
MSTRG.996	MSTRG.996.1	957	Novel transcript variant
MSTRG.996	ACOC_0000105801-mRNA-1	789	Reference transcript variant
MSTRG.997	MSTRG.997.1	681	Merged transcript
MSTRG.997	MSTRG.997.2	2370	Merged transcript
MSTRG.997	MSTRG.997.4	1776	Merged transcript
MSTRG.998	MSTRG.998.1	2025	Novel transcript variant
MSTRG.998	ACOC_0000106101-mRNA-1	1545	Reference transcript variant
ACOC_0000106201	ACOC_0000106201-mRNA-1	537	Reference transcript
MSTRG.999	MSTRG.999.1	531	Merged transcript
MSTRG.999	MSTRG.999.2	1248	Merged transcript
MSTRG.1000	ACOC_0000106401-mRNA-1	213	Reference transcript
MSTRG.999	ACOC_0000106501-mRNA-1	876	Split transcript
MSTRG.1001	ACOC_0000106601-mRNA-1	1635	Split transcript
MSTRG.1001	MSTRG.1001.2	2172	Merged transcript
MSTRG.1001	ACOC_0000106701-mRNA-1	249	Split transcript
MSTRG.1002	MSTRG.1002.1	969	Novel transcript variant
MSTRG.1002	ACOC_0000106801-mRNA-1	1029	Reference transcript variant
MSTRG.1003	MSTRG.1003.1	3453	Novel transcript variant
MSTRG.1004	MSTRG.1004.2	1566	Novel transcript variant
MSTRG.1005	MSTRG.1005.1	1335	Novel transcript variant
MSTRG.1005	ACOC_0000107101-mRNA-1	1338	Reference transcript variant
MSTRG.1006	ACOC_0000107201-mRNA-1	4233	Split transcript
MSTRG.1006	MSTRG.1006.1	5229	Merged transcript
MSTRG.1007	MSTRG.1007.1	513	Novel transcript variant
MSTRG.1007	ACOC_0000107401-mRNA-1	501	Reference transcript variant
MSTRG.1009	ACOC_0000107601-mRNA-1	789	Split transcript
MSTRG.1009	MSTRG.1009.1	930	Merged transcript
MSTRG.1009	ACOC_0000107701-mRNA-1	201	Split transcript
MSTRG.1010	ACOC_0000107801-mRNA-1	2256	Reference transcript variant
MSTRG.1011	ACOC_0000107901-mRNA-1	405	Reference transcript
MSTRG.1012	MSTRG.1012.1	2643	Novel transcript variant
MSTRG.1012	ACOC_0000108001-mRNA-1	2187	Reference transcript variant
MSTRG.1013	ACOC_0000108101-mRNA-1	531	Reference transcript variant
MSTRG.1013	MSTRG.1013.1	579	Novel transcript variant
MSTRG.1014	MSTRG.1014.1	1383	Novel transcript variant
ACOC_0000108301	ACOC_0000108301-mRNA-1	336	Reference transcript
ACOC_0000108401	ACOC_0000108401-mRNA-1	300	Reference transcript
MSTRG.1015	MSTRG.1015.1	891	Novel transcript variant
MSTRG.1015	ACOC_0000108501-mRNA-1	909	Reference transcript variant
MSTRG.1016	MSTRG.1016.1	2025	Novel transcript variant
MSTRG.1016	ACOC_0000108601-mRNA-1	2046	Reference transcript variant
MSTRG.1017	MSTRG.1017.1	1089	Novel transcript variant
MSTRG.1017	ACOC_0000108701-mRNA-1	942	Reference transcript variant
ACOC_0000108801	ACOC_0000108801-mRNA-1	312	Reference transcript
MSTRG.1018	MSTRG.1018.1	783	Novel transcript
MSTRG.1019	MSTRG.1019.1	2196	Novel transcript variant
MSTRG.1019	ACOC_0000108901-mRNA-1	2259	Reference transcript variant
MSTRG.1020	MSTRG.1020.1	486	Novel transcript
MSTRG.1021	MSTRG.1021.1	1125	Novel transcript
MSTRG.1022	MSTRG.1022.2	2205	Merged transcript
MSTRG.1022	ACOC_0000109101-mRNA-1	486	Split transcript
MSTRG.1023	ACOC_0000109201-mRNA-1	453	Reference transcript
MSTRG.1024	ACOC_0000109301-mRNA-1	1404	Reference transcript variant
MSTRG.1024	MSTRG.1024.2	1038	Novel transcript variant
MSTRG.1025	MSTRG.1025.1	381	Novel transcript
MSTRG.1026	MSTRG.1026.1	1206	Novel transcript variant
MSTRG.1026	ACOC_0000109401-mRNA-1	1155	Reference transcript variant
MSTRG.1027	MSTRG.1027.1	3714	Novel transcript variant
MSTRG.1027	ACOC_0000109501-mRNA-1	3855	Reference transcript variant
MSTRG.1028	ACOC_0000109601-mRNA-1	1020	Split transcript
MSTRG.1028	MSTRG.1028.1	1332	Merged transcript
MSTRG.1028	ACOC_0000109701-mRNA-1	495	Split transcript
MSTRG.1029	MSTRG.1029.1	399	Novel transcript variant
MSTRG.1029	ACOC_0000109801-mRNA-1	390	Reference transcript variant
MSTRG.1030	ACOC_0000109901-mRNA-1	837	Reference transcript variant
MSTRG.1030	MSTRG.1030.2	1053	Novel transcript variant
MSTRG.1031	MSTRG.1031.1	723	Novel transcript
MSTRG.1031	MSTRG.1031.2	1005	Novel transcript
MSTRG.1032	ACOC_0000110001-mRNA-1	696	Split transcript
MSTRG.1032	MSTRG.1032.1	2040	Merged transcript
MSTRG.1032	ACOC_0000110101-mRNA-1	1374	Split transcript
MSTRG.1032	MSTRG.1032.4	720	Merged transcript
MSTRG.1033	ACOC_0000110201-mRNA-1	486	Reference transcript
MSTRG.1034	MSTRG.1034.1	1341	Novel transcript variant
MSTRG.1034	MSTRG.1034.2	1248	Novel transcript variant
MSTRG.1035	ACOC_0000110301-mRNA-1	723	Reference transcript
MSTRG.1036	MSTRG.1036.1	804	Novel transcript variant
MSTRG.1037	MSTRG.1037.1	1113	Novel transcript variant
MSTRG.1038	MSTRG.1038.1	1050	Novel transcript variant
MSTRG.1038	ACOC_0000110701-mRNA-1	1101	Reference transcript variant
MSTRG.1039	ACOC_0000110801-mRNA-1	435	Reference transcript
MSTRG.1040	ACOC_0000110901-mRNA-1	2175	Split transcript
MSTRG.1040	MSTRG.1040.1	7782	Merged transcript
MSTRG.1041	MSTRG.1041.1	1329	Novel transcript variant
MSTRG.1041	ACOC_0000111101-mRNA-1	1083	Reference transcript variant
MSTRG.1042	MSTRG.1042.1	1464	Novel transcript variant
MSTRG.1043	ACOC_0000111301-mRNA-1	1113	Reference transcript variant
MSTRG.1043	MSTRG.1043.2	873	Novel transcript variant
MSTRG.1044	MSTRG.1044.1	558	Novel transcript
MSTRG.1045	MSTRG.1045.1	1110	Novel transcript
MSTRG.1046	MSTRG.1046.1	774	Novel transcript
MSTRG.1046	MSTRG.1046.2	777	Novel transcript
ACOC_0000111401	ACOC_0000111401-mRNA-1	216	Reference transcript
MSTRG.1047	MSTRG.1047.1	1725	Novel transcript variant
MSTRG.1047	ACOC_0000111501-mRNA-1	1647	Reference transcript variant
MSTRG.1048	ACOC_0000111601-mRNA-1	564	Split transcript
MSTRG.1049	MSTRG.1049.1	225	Novel transcript
MSTRG.1048	MSTRG.1048.2	4176	Merged transcript
MSTRG.1048	ACOC_0000111701-mRNA-1	3609	Split transcript
MSTRG.1050	MSTRG.1050.1	348	Novel transcript variant
MSTRG.1050	ACOC_0000111801-mRNA-1	231	Reference transcript variant
MSTRG.1052	ACOC_0000112001-mRNA-1	321	Reference transcript variant
MSTRG.1052	MSTRG.1052.2	1257	Novel transcript variant
MSTRG.1053	MSTRG.1053.1	2193	Merged transcript
MSTRG.1053	ACOC_0000112201-mRNA-1	396	Split transcript
MSTRG.1054	MSTRG.1054.1	873	Novel transcript variant
MSTRG.1054	ACOC_0000112301-mRNA-1	936	Reference transcript variant
MSTRG.1055	ACOC_0000112401-mRNA-1	798	Reference transcript
MSTRG.1056	MSTRG.1056.1	267	Novel transcript
MSTRG.1057	MSTRG.1057.2	933	Novel transcript variant
ACOC_0000112601	ACOC_0000112601-mRNA-1	252	Reference transcript
MSTRG.1058	MSTRG.1058.1	234	Novel transcript
MSTRG.1059	ACOC_0000112701-mRNA-1	717	Reference transcript variant
MSTRG.1059	MSTRG.1059.1	978	Novel transcript variant
MSTRG.1060	ACOC_0000112801-mRNA-1	693	Reference transcript variant
MSTRG.1060	MSTRG.1060.1	2013	Novel transcript variant
MSTRG.1060	MSTRG.1060.2	2013	Novel transcript variant
MSTRG.1061	MSTRG.1061.1	1053	Novel transcript variant
MSTRG.1061	ACOC_0000112901-mRNA-1	495	Reference transcript variant
MSTRG.1063	ACOC_0000113001-mRNA-1	1533	Reference transcript
ACOC_0000113101	ACOC_0000113101-mRNA-1	243	Reference transcript
MSTRG.1064	MSTRG.1064.1	2907	Novel transcript variant
MSTRG.1064	ACOC_0000113201-mRNA-1	1389	Reference transcript variant
MSTRG.1065	MSTRG.1065.1	2448	Novel transcript variant
MSTRG.1065	ACOC_0000113301-mRNA-1	2208	Reference transcript variant
MSTRG.1066	MSTRG.1066.1	480	Novel transcript variant
MSTRG.1066	ACOC_0000113401-mRNA-1	342	Reference transcript variant
MSTRG.1067	MSTRG.1067.1	264	Novel transcript
MSTRG.1068	ACOC_0000113501-mRNA-1	1266	Reference transcript variant
MSTRG.1069	ACOC_0000113601-mRNA-1	552	Reference transcript variant
MSTRG.1070	MSTRG.1070.1	3921	Novel transcript variant
MSTRG.1070	MSTRG.1070.2	4212	Novel transcript variant
MSTRG.1070	MSTRG.1070.3	4281	Novel transcript variant
MSTRG.1070	ACOC_0000113701-mRNA-1	3882	Reference transcript variant
MSTRG.1071	MSTRG.1071.1	324	Novel transcript variant
MSTRG.1071	ACOC_0000113801-mRNA-1	207	Reference transcript variant
MSTRG.1072	MSTRG.1072.2	708	Novel transcript variant
MSTRG.1073	MSTRG.1073.1	4929	Novel transcript variant
MSTRG.1073	ACOC_0000114001-mRNA-1	4404	Reference transcript variant
MSTRG.1074	MSTRG.1074.1	450	Novel transcript variant
MSTRG.1074	MSTRG.1074.2	453	Novel transcript variant
MSTRG.1074	ACOC_0000114101-mRNA-1	327	Reference transcript variant
MSTRG.1075	MSTRG.1075.1	2106	Novel transcript variant
MSTRG.1075	MSTRG.1075.2	2109	Novel transcript variant
MSTRG.1076	ACOC_0000114301-mRNA-1	1452	Split transcript
MSTRG.1076	MSTRG.1076.2	3819	Merged transcript
MSTRG.1076	MSTRG.1076.1	3813	Merged transcript
MSTRG.1076	ACOC_0000114401-mRNA-1	2001	Split transcript
ACOC_0000114501	ACOC_0000114501-mRNA-1	348	Reference transcript
MSTRG.1077	MSTRG.1077.1	753	Novel transcript variant
MSTRG.1077	ACOC_0000114601-mRNA-1	375	Reference transcript variant
MSTRG.1078	ACOC_0000114701-mRNA-1	519	Split transcript
MSTRG.1078	MSTRG.1078.1	1998	Merged transcript
MSTRG.1078	ACOC_0000114801-mRNA-1	1302	Split transcript
MSTRG.1079	ACOC_0000114901-mRNA-1	1650	Reference transcript variant
MSTRG.1079	MSTRG.1079.1	1200	Novel transcript variant
MSTRG.1079	MSTRG.1079.2	1497	Novel transcript variant
MSTRG.1080	ACOC_0000115001-mRNA-1	909	Reference transcript variant
MSTRG.1080	MSTRG.1080.1	1278	Novel transcript variant
MSTRG.1081	MSTRG.1081.1	951	Novel transcript variant
MSTRG.1082	MSTRG.1082.1	2154	Novel transcript variant
MSTRG.1082	MSTRG.1082.2	2169	Novel transcript variant
ACOC_0000115401	ACOC_0000115401-mRNA-1	213	Reference transcript
MSTRG.1083	MSTRG.1083.1	321	Novel transcript
MSTRG.1084	MSTRG.1084.1	627	Novel transcript variant
MSTRG.1084	ACOC_0000115501-mRNA-1	384	Reference transcript variant
MSTRG.1085	MSTRG.1085.1	579	Novel transcript
MSTRG.1085	MSTRG.1085.2	363	Novel transcript
MSTRG.1086	MSTRG.1086.1	372	Novel transcript
MSTRG.1087	MSTRG.1087.1	7038	Novel transcript variant
MSTRG.1088	MSTRG.1088.1	2010	Novel transcript variant
MSTRG.1088	ACOC_0000115701-mRNA-1	714	Reference transcript variant
MSTRG.1089	MSTRG.1089.1	1380	Novel transcript
MSTRG.1090	ACOC_0000115801-mRNA-1	447	Reference transcript
MSTRG.1091	MSTRG.1091.1	1974	Novel transcript variant
MSTRG.1091	ACOC_0000115901-mRNA-1	1491	Reference transcript variant
MSTRG.1092	MSTRG.1092.1	1476	Novel transcript variant
MSTRG.1094	ACOC_0000116201-mRNA-1	384	Reference transcript variant
MSTRG.1094	MSTRG.1094.1	408	Novel transcript variant
MSTRG.1095	MSTRG.1095.1	231	Novel transcript
MSTRG.1096	ACOC_0000116301-mRNA-1	378	Split transcript
MSTRG.1096	MSTRG.1096.2	1002	Merged transcript
MSTRG.1096	ACOC_0000116401-mRNA-1	681	Split transcript
MSTRG.1097	MSTRG.1097.1	1098	Novel transcript variant
MSTRG.1097	ACOC_0000116501-mRNA-1	591	Reference transcript variant
MSTRG.1098	ACOC_0000116601-mRNA-1	813	Reference transcript
MSTRG.1099	ACOC_0000116701-mRNA-1	897	Reference transcript variant
MSTRG.1099	MSTRG.1099.2	660	Novel transcript variant
ACOC_0000116801	ACOC_0000116801-mRNA-1	639	Reference transcript
ACOC_0000116901	ACOC_0000116901-mRNA-1	336	Reference transcript
MSTRG.1100	MSTRG.1100.1	960	Novel transcript variant
MSTRG.1100	ACOC_0000117001-mRNA-1	1005	Reference transcript variant
MSTRG.1101	MSTRG.1101.1	1080	Novel transcript variant
MSTRG.1101	ACOC_0000117101-mRNA-1	972	Reference transcript variant
MSTRG.1102	MSTRG.1102.1	1029	Novel transcript variant
MSTRG.1102	ACOC_0000117201-mRNA-1	843	Reference transcript variant
MSTRG.1103	MSTRG.1103.1	846	Novel transcript variant
MSTRG.1103	ACOC_0000117301-mRNA-1	951	Reference transcript variant
MSTRG.1104	MSTRG.1104.1	2820	Novel transcript variant
MSTRG.1104	ACOC_0000117401-mRNA-1	1737	Reference transcript variant
MSTRG.1104	MSTRG.1104.3	825	Novel transcript variant
MSTRG.1105	ACOC_0000117501-mRNA-1	747	Reference transcript
MSTRG.1106	MSTRG.1106.1	729	Novel transcript variant
MSTRG.1106	ACOC_0000117601-mRNA-1	414	Reference transcript variant
MSTRG.1107	MSTRG.1107.1	1080	Novel transcript variant
MSTRG.1107	ACOC_0000117701-mRNA-1	588	Reference transcript variant
MSTRG.1108	MSTRG.1108.1	381	Novel transcript variant
MSTRG.1108	ACOC_0000117801-mRNA-1	477	Reference transcript variant
MSTRG.1109	MSTRG.1109.1	5409	Novel transcript variant
MSTRG.1109	MSTRG.1109.2	5400	Novel transcript variant
MSTRG.1109	MSTRG.1109.3	5415	Novel transcript variant
MSTRG.1109	MSTRG.1109.4	5412	Novel transcript variant
MSTRG.1110	MSTRG.1110.1	792	Novel transcript
MSTRG.1110	MSTRG.1110.2	711	Novel transcript
MSTRG.1111	MSTRG.1111.1	1620	Novel transcript variant
MSTRG.1111	ACOC_0000118001-mRNA-1	1974	Reference transcript variant
MSTRG.1111	MSTRG.1111.3	273	Novel transcript variant
MSTRG.1112	ACOC_0000118101-mRNA-1	720	Reference transcript
MSTRG.1113	MSTRG.1113.1	12120	Novel transcript variant
MSTRG.1113	ACOC_0000118201-mRNA-1	11454	Reference transcript variant
MSTRG.1114	ACOC_0000118401-mRNA-1	1245	Split transcript
MSTRG.1115	MSTRG.1115.1	1131	Novel transcript variant
MSTRG.1116	MSTRG.1116.1	4740	Novel transcript variant
MSTRG.1117	MSTRG.1117.1	1617	Novel transcript variant
MSTRG.1117	ACOC_0000118701-mRNA-1	1683	Reference transcript variant
MSTRG.1118	MSTRG.1118.1	1479	Novel transcript variant
MSTRG.1118	ACOC_0000118801-mRNA-1	798	Reference transcript variant
MSTRG.1119	ACOC_0000118901-mRNA-1	684	Reference transcript variant
MSTRG.1119	MSTRG.1119.1	1212	Novel transcript variant
MSTRG.1120	MSTRG.1120.1	1692	Novel transcript variant
MSTRG.1120	ACOC_0000119001-mRNA-1	1764	Reference transcript variant
MSTRG.1121	MSTRG.1121.1	576	Novel transcript variant
MSTRG.1122	ACOC_0000119201-mRNA-1	831	Reference transcript variant
MSTRG.1122	MSTRG.1122.1	1176	Novel transcript variant
MSTRG.1123	ACOC_0000119301-mRNA-1	672	Split transcript
MSTRG.1123	MSTRG.1123.1	1953	Merged transcript
MSTRG.1123	ACOC_0000119401-mRNA-1	1218	Split transcript
MSTRG.1124	MSTRG.1124.1	375	Novel transcript variant
MSTRG.1124	MSTRG.1124.2	333	Novel transcript variant
MSTRG.1124	ACOC_0000119501-mRNA-1	378	Reference transcript variant
MSTRG.1125	MSTRG.1125.1	2124	Merged transcript
MSTRG.1125	ACOC_0000119601-mRNA-1	270	Split transcript
MSTRG.1126	ACOC_0000119701-mRNA-1	342	Reference transcript
MSTRG.1125	ACOC_0000119801-mRNA-1	1323	Split transcript
MSTRG.1128	MSTRG.1128.1	207	Novel transcript
MSTRG.1127	MSTRG.1127.2	345	Novel transcript variant
MSTRG.1129	MSTRG.1129.1	1785	Novel transcript variant
MSTRG.1129	MSTRG.1129.2	1842	Novel transcript variant
MSTRG.1129	ACOC_0000120001-mRNA-1	1641	Reference transcript variant
MSTRG.1129	MSTRG.1129.4	972	Novel transcript variant
MSTRG.1130	ACOC_0000120101-mRNA-1	612	Reference transcript variant
MSTRG.1131	MSTRG.1131.1	237	Novel transcript
MSTRG.1132	MSTRG.1132.1	978	Novel transcript variant
MSTRG.1133	MSTRG.1133.1	3387	Merged transcript
MSTRG.1134	ACOC_0000120501-mRNA-1	399	Reference transcript variant
MSTRG.1134	MSTRG.1134.1	321	Novel transcript variant
MSTRG.1136	MSTRG.1136.1	1479	Novel transcript variant
MSTRG.1136	ACOC_0000120601-mRNA-1	1383	Reference transcript variant
MSTRG.1137	MSTRG.1137.1	1686	Novel transcript variant
MSTRG.1138	MSTRG.1138.1	279	Novel transcript
MSTRG.1139	MSTRG.1139.1	3069	Novel transcript variant
MSTRG.1140	MSTRG.1140.1	2700	Novel transcript variant
MSTRG.1140	MSTRG.1140.2	3030	Novel transcript variant
MSTRG.1140	ACOC_0000120901-mRNA-1	1518	Reference transcript variant
MSTRG.1141	MSTRG.1141.1	1587	Merged transcript
MSTRG.1142	MSTRG.1142.1	1296	Novel transcript variant
MSTRG.1142	ACOC_0000121201-mRNA-1	912	Reference transcript variant
MSTRG.1143	ACOC_0000121301-mRNA-1	294	Reference transcript
ACOC_0000121401	ACOC_0000121401-mRNA-1	261	Reference transcript
MSTRG.1144	MSTRG.1144.1	1584	Novel transcript variant
MSTRG.1145	MSTRG.1145.1	1422	Novel transcript variant
MSTRG.1145	ACOC_0000121601-mRNA-1	963	Reference transcript variant
MSTRG.1146	MSTRG.1146.1	1284	Novel transcript variant
[truncated: 19,586 more rows]
