# Supplementary material for: Identification of Novel Genes and Proteoforms in Angiostrongylus costaricensis through a Proteogenomic Approach
Source: Pathogens. 2022 Oct 31;11(11):1273. doi: 10.3390/pathogens11111273 (PMC9694666; doi:10.3390/pathogens11111273)
Supplement: Supplementary file 1 [file pathogens-11-01273-s001.zip › Supplemental_Data_S2.xlsx]

## Sheet: WormBase
Supplemental Data S2. Wormbase
Gene ID	Transcript ID
ACOC_0000106401	ACOC_0000106401-mRNA-1
ACOC_0001023501	ACOC_0001023501-mRNA-1
ACOC_0001023701	ACOC_0001023701-mRNA-1
ACOC_0001023901	ACOC_0001023901-mRNA-1
ACOC_0001024101	ACOC_0001024101-mRNA-1
ACOC_0001024201	ACOC_0001024201-mRNA-1
ACOC_0001025501	ACOC_0001025501-mRNA-1
ACOC_0001028201	ACOC_0001028201-mRNA-1
ACOC_0001029001	ACOC_0001029001-mRNA-1
ACOC_0001029101	ACOC_0001029101-mRNA-1
ACOC_0001029401	ACOC_0001029401-mRNA-1
ACOC_0001029501	ACOC_0001029501-mRNA-1
ACOC_0001029801	ACOC_0001029801-mRNA-1
ACOC_0001030201	ACOC_0001030201-mRNA-1
ACOC_0001030801	ACOC_0001030801-mRNA-1
ACOC_0001032201	ACOC_0001032201-mRNA-1
ACOC_0001032701	ACOC_0001032701-mRNA-1
ACOC_0001033401	ACOC_0001033401-mRNA-1
ACOC_0001034701	ACOC_0001034701-mRNA-1
ACOC_0001035101	ACOC_0001035101-mRNA-1
ACOC_0000107901	ACOC_0000107901-mRNA-1
ACOC_0001036701	ACOC_0001036701-mRNA-1
ACOC_0001037401	ACOC_0001037401-mRNA-1
ACOC_0001039201	ACOC_0001039201-mRNA-1
ACOC_0001039701	ACOC_0001039701-mRNA-1
ACOC_0001040301	ACOC_0001040301-mRNA-1
ACOC_0001043701	ACOC_0001043701-mRNA-1
ACOC_0001044701	ACOC_0001044701-mRNA-1
ACOC_0001045401	ACOC_0001045401-mRNA-1
ACOC_0001045901	ACOC_0001045901-mRNA-1
ACOC_0001046101	ACOC_0001046101-mRNA-1
ACOC_0001046201	ACOC_0001046201-mRNA-1
ACOC_0000109201	ACOC_0000109201-mRNA-1
ACOC_0001046701	ACOC_0001046701-mRNA-1
ACOC_0001047101	ACOC_0001047101-mRNA-1
ACOC_0001047801	ACOC_0001047801-mRNA-1
ACOC_0001047901	ACOC_0001047901-mRNA-1
ACOC_0001048001	ACOC_0001048001-mRNA-1
ACOC_0001048301	ACOC_0001048301-mRNA-1
ACOC_0001048601	ACOC_0001048601-mRNA-1
ACOC_0001048801	ACOC_0001048801-mRNA-1
ACOC_0001048901	ACOC_0001048901-mRNA-1
ACOC_0001049001	ACOC_0001049001-mRNA-1
ACOC_0001049201	ACOC_0001049201-mRNA-1
ACOC_0001050301	ACOC_0001050301-mRNA-1
ACOC_0001050801	ACOC_0001050801-mRNA-1
ACOC_0001051501	ACOC_0001051501-mRNA-1
ACOC_0001052401	ACOC_0001052401-mRNA-1
ACOC_0000012301	ACOC_0000012301-mRNA-1
ACOC_0001053401	ACOC_0001053401-mRNA-1
ACOC_0001054501	ACOC_0001054501-mRNA-1
ACOC_0001055201	ACOC_0001055201-mRNA-1
ACOC_0001055801	ACOC_0001055801-mRNA-1
ACOC_0000110201	ACOC_0000110201-mRNA-1
ACOC_0001056901	ACOC_0001056901-mRNA-1
ACOC_0001057701	ACOC_0001057701-mRNA-1
ACOC_0001058001	ACOC_0001058001-mRNA-1
ACOC_0001058401	ACOC_0001058401-mRNA-1
ACOC_0000110301	ACOC_0000110301-mRNA-1
ACOC_0001059401	ACOC_0001059401-mRNA-1
ACOC_0001062301	ACOC_0001062301-mRNA-1
ACOC_0001062501	ACOC_0001062501-mRNA-1
ACOC_0001063401	ACOC_0001063401-mRNA-1
ACOC_0000110801	ACOC_0000110801-mRNA-1
ACOC_0001064001	ACOC_0001064001-mRNA-1
ACOC_0001064301	ACOC_0001064301-mRNA-1
ACOC_0001065701	ACOC_0001065701-mRNA-1
ACOC_0001067301	ACOC_0001067301-mRNA-1
ACOC_0001067901	ACOC_0001067901-mRNA-1
ACOC_0001068201	ACOC_0001068201-mRNA-1
ACOC_0001070601	ACOC_0001070601-mRNA-1
ACOC_0001071201	ACOC_0001071201-mRNA-1
ACOC_0001071301	ACOC_0001071301-mRNA-1
ACOC_0001074601	ACOC_0001074601-mRNA-1
ACOC_0001075101	ACOC_0001075101-mRNA-1
ACOC_0001075201	ACOC_0001075201-mRNA-1
ACOC_0001077501	ACOC_0001077501-mRNA-1
ACOC_0001077801	ACOC_0001077801-mRNA-1
ACOC_0001079001	ACOC_0001079001-mRNA-1
ACOC_0001079601	ACOC_0001079601-mRNA-1
ACOC_0001079701	ACOC_0001079701-mRNA-1
ACOC_0001080201	ACOC_0001080201-mRNA-1
ACOC_0001080401	ACOC_0001080401-mRNA-1
ACOC_0000112401	ACOC_0000112401-mRNA-1
ACOC_0001083401	ACOC_0001083401-mRNA-1
ACOC_0001083501	ACOC_0001083501-mRNA-1
ACOC_0001085001	ACOC_0001085001-mRNA-1
ACOC_0001085501	ACOC_0001085501-mRNA-1
ACOC_0001086001	ACOC_0001086001-mRNA-1
ACOC_0001086601	ACOC_0001086601-mRNA-1
ACOC_0001087801	ACOC_0001087801-mRNA-1
ACOC_0001088401	ACOC_0001088401-mRNA-1
ACOC_0001088701	ACOC_0001088701-mRNA-1
ACOC_0001088801	ACOC_0001088801-mRNA-1
ACOC_0000113001	ACOC_0000113001-mRNA-1
ACOC_0001089701	ACOC_0001089701-mRNA-1
ACOC_0001091401	ACOC_0001091401-mRNA-1
ACOC_0001092101	ACOC_0001092101-mRNA-1
ACOC_0001093801	ACOC_0001093801-mRNA-1
ACOC_0001096201	ACOC_0001096201-mRNA-1
ACOC_0000012601	ACOC_0000012601-mRNA-1
ACOC_0001096401	ACOC_0001096401-mRNA-1
ACOC_0001097201	ACOC_0001097201-mRNA-1
ACOC_0001097301	ACOC_0001097301-mRNA-1
ACOC_0001099601	ACOC_0001099601-mRNA-1
ACOC_0001100001	ACOC_0001100001-mRNA-1
ACOC_0001101101	ACOC_0001101101-mRNA-1
ACOC_0001102101	ACOC_0001102101-mRNA-1
ACOC_0001103401	ACOC_0001103401-mRNA-1
ACOC_0001103701	ACOC_0001103701-mRNA-1
ACOC_0001104701	ACOC_0001104701-mRNA-1
ACOC_0001105501	ACOC_0001105501-mRNA-1
ACOC_0001107101	ACOC_0001107101-mRNA-1
ACOC_0001107901	ACOC_0001107901-mRNA-1
ACOC_0001109901	ACOC_0001109901-mRNA-1
ACOC_0001110301	ACOC_0001110301-mRNA-1
ACOC_0001113201	ACOC_0001113201-mRNA-1
ACOC_0001113901	ACOC_0001113901-mRNA-1
ACOC_0001114101	ACOC_0001114101-mRNA-1
ACOC_0001115301	ACOC_0001115301-mRNA-1
ACOC_0001116101	ACOC_0001116101-mRNA-1
ACOC_0001116401	ACOC_0001116401-mRNA-1
ACOC_0001116701	ACOC_0001116701-mRNA-1
ACOC_0000115801	ACOC_0000115801-mRNA-1
ACOC_0001117601	ACOC_0001117601-mRNA-1
ACOC_0001118101	ACOC_0001118101-mRNA-1
ACOC_0001120901	ACOC_0001120901-mRNA-1
ACOC_0001121801	ACOC_0001121801-mRNA-1
ACOC_0001122101	ACOC_0001122101-mRNA-1
ACOC_0001122201	ACOC_0001122201-mRNA-1
ACOC_0001122501	ACOC_0001122501-mRNA-1
ACOC_0001122601	ACOC_0001122601-mRNA-1
ACOC_0001123501	ACOC_0001123501-mRNA-1
ACOC_0001124001	ACOC_0001124001-mRNA-1
ACOC_0001124201	ACOC_0001124201-mRNA-1
ACOC_0001124301	ACOC_0001124301-mRNA-1
ACOC_0001124501	ACOC_0001124501-mRNA-1
ACOC_0000116601	ACOC_0000116601-mRNA-1
ACOC_0001125801	ACOC_0001125801-mRNA-1
ACOC_0001126101	ACOC_0001126101-mRNA-1
ACOC_0001126301	ACOC_0001126301-mRNA-1
ACOC_0001127201	ACOC_0001127201-mRNA-1
ACOC_0001127901	ACOC_0001127901-mRNA-1
ACOC_0001129301	ACOC_0001129301-mRNA-1
ACOC_0000117501	ACOC_0000117501-mRNA-1
ACOC_0001133701	ACOC_0001133701-mRNA-1
ACOC_0001133801	ACOC_0001133801-mRNA-1
ACOC_0001135101	ACOC_0001135101-mRNA-1
ACOC_0001135601	ACOC_0001135601-mRNA-1
ACOC_0001136101	ACOC_0001136101-mRNA-1
ACOC_0001136701	ACOC_0001136701-mRNA-1
ACOC_0001136801	ACOC_0001136801-mRNA-1
ACOC_0001137201	ACOC_0001137201-mRNA-1
ACOC_0001138401	ACOC_0001138401-mRNA-1
ACOC_0000118101	ACOC_0000118101-mRNA-1
ACOC_0001140001	ACOC_0001140001-mRNA-1
ACOC_0001141801	ACOC_0001141801-mRNA-1
ACOC_0001142401	ACOC_0001142401-mRNA-1
ACOC_0001142801	ACOC_0001142801-mRNA-1
ACOC_0001143601	ACOC_0001143601-mRNA-1
ACOC_0001145301	ACOC_0001145301-mRNA-1
ACOC_0001146201	ACOC_0001146201-mRNA-1
ACOC_0001146901	ACOC_0001146901-mRNA-1
ACOC_0001147101	ACOC_0001147101-mRNA-1
ACOC_0001148101	ACOC_0001148101-mRNA-1
ACOC_0001149101	ACOC_0001149101-mRNA-1
ACOC_0001150501	ACOC_0001150501-mRNA-1
ACOC_0001151501	ACOC_0001151501-mRNA-1
ACOC_0001151701	ACOC_0001151701-mRNA-1
ACOC_0001151901	ACOC_0001151901-mRNA-1
ACOC_0001153701	ACOC_0001153701-mRNA-1
ACOC_0000119701	ACOC_0000119701-mRNA-1
ACOC_0001155301	ACOC_0001155301-mRNA-1
ACOC_0001156101	ACOC_0001156101-mRNA-1
ACOC_0001157501	ACOC_0001157501-mRNA-1
ACOC_0001157901	ACOC_0001157901-mRNA-1
ACOC_0001159001	ACOC_0001159001-mRNA-1
ACOC_0001159701	ACOC_0001159701-mRNA-1
ACOC_0001159801	ACOC_0001159801-mRNA-1
ACOC_0001160901	ACOC_0001160901-mRNA-1
ACOC_0001162101	ACOC_0001162101-mRNA-1
ACOC_0001163001	ACOC_0001163001-mRNA-1
ACOC_0001163601	ACOC_0001163601-mRNA-1
ACOC_0001164401	ACOC_0001164401-mRNA-1
ACOC_0001165601	ACOC_0001165601-mRNA-1
ACOC_0001166901	ACOC_0001166901-mRNA-1
ACOC_0001167701	ACOC_0001167701-mRNA-1
ACOC_0001168101	ACOC_0001168101-mRNA-1
ACOC_0001168801	ACOC_0001168801-mRNA-1
ACOC_0001169001	ACOC_0001169001-mRNA-1
ACOC_0000121301	ACOC_0000121301-mRNA-1
ACOC_0001170601	ACOC_0001170601-mRNA-1
ACOC_0001171101	ACOC_0001171101-mRNA-1
ACOC_0001171401	ACOC_0001171401-mRNA-1
ACOC_0001171601	ACOC_0001171601-mRNA-1
ACOC_0001172901	ACOC_0001172901-mRNA-1
ACOC_0001174201	ACOC_0001174201-mRNA-1
ACOC_0001176001	ACOC_0001176001-mRNA-1
ACOC_0001176801	ACOC_0001176801-mRNA-1
ACOC_0001176901	ACOC_0001176901-mRNA-1
ACOC_0001177001	ACOC_0001177001-mRNA-1
ACOC_0001178501	ACOC_0001178501-mRNA-1
ACOC_0001179101	ACOC_0001179101-mRNA-1
ACOC_0001181001	ACOC_0001181001-mRNA-1
ACOC_0001182101	ACOC_0001182101-mRNA-1
ACOC_0001183401	ACOC_0001183401-mRNA-1
ACOC_0001184101	ACOC_0001184101-mRNA-1
ACOC_0001184201	ACOC_0001184201-mRNA-1
ACOC_0001184301	ACOC_0001184301-mRNA-1
ACOC_0001184601	ACOC_0001184601-mRNA-1
ACOC_0001185101	ACOC_0001185101-mRNA-1
ACOC_0001185301	ACOC_0001185301-mRNA-1
ACOC_0000122901	ACOC_0000122901-mRNA-1
ACOC_0001185901	ACOC_0001185901-mRNA-1
ACOC_0001186401	ACOC_0001186401-mRNA-1
ACOC_0001186801	ACOC_0001186801-mRNA-1
ACOC_0001187801	ACOC_0001187801-mRNA-1
ACOC_0001188101	ACOC_0001188101-mRNA-1
ACOC_0000123501	ACOC_0000123501-mRNA-1
ACOC_0001191201	ACOC_0001191201-mRNA-1
ACOC_0001193901	ACOC_0001193901-mRNA-1
ACOC_0001194301	ACOC_0001194301-mRNA-1
ACOC_0001195001	ACOC_0001195001-mRNA-1
ACOC_0001195401	ACOC_0001195401-mRNA-1
ACOC_0001197001	ACOC_0001197001-mRNA-1
ACOC_0001198101	ACOC_0001198101-mRNA-1
ACOC_0001198201	ACOC_0001198201-mRNA-1
ACOC_0001198801	ACOC_0001198801-mRNA-1
ACOC_0001199201	ACOC_0001199201-mRNA-1
ACOC_0001200001	ACOC_0001200001-mRNA-1
ACOC_0001200301	ACOC_0001200301-mRNA-1
ACOC_0000124601	ACOC_0000124601-mRNA-1
ACOC_0001200601	ACOC_0001200601-mRNA-1
ACOC_0001201201	ACOC_0001201201-mRNA-1
ACOC_0001201501	ACOC_0001201501-mRNA-1
ACOC_0001202101	ACOC_0001202101-mRNA-1
ACOC_0001202501	ACOC_0001202501-mRNA-1
ACOC_0001202901	ACOC_0001202901-mRNA-1
ACOC_0001203001	ACOC_0001203001-mRNA-1
ACOC_0001203201	ACOC_0001203201-mRNA-1
ACOC_0001203701	ACOC_0001203701-mRNA-1
ACOC_0001204901	ACOC_0001204901-mRNA-1
ACOC_0001205201	ACOC_0001205201-mRNA-1
ACOC_0001206501	ACOC_0001206501-mRNA-1
ACOC_0001209001	ACOC_0001209001-mRNA-1
ACOC_0001209901	ACOC_0001209901-mRNA-1
ACOC_0001211401	ACOC_0001211401-mRNA-1
ACOC_0000125601	ACOC_0000125601-mRNA-1
ACOC_0001211901	ACOC_0001211901-mRNA-1
ACOC_0001213901	ACOC_0001213901-mRNA-1
ACOC_0001214401	ACOC_0001214401-mRNA-1
ACOC_0001215101	ACOC_0001215101-mRNA-1
ACOC_0001215301	ACOC_0001215301-mRNA-1
ACOC_0001215701	ACOC_0001215701-mRNA-1
ACOC_0001216701	ACOC_0001216701-mRNA-1
ACOC_0001217801	ACOC_0001217801-mRNA-1
ACOC_0001218101	ACOC_0001218101-mRNA-1
ACOC_0001218601	ACOC_0001218601-mRNA-1
ACOC_0001219301	ACOC_0001219301-mRNA-1
ACOC_0001219601	ACOC_0001219601-mRNA-1
ACOC_0001221501	ACOC_0001221501-mRNA-1
ACOC_0001222501	ACOC_0001222501-mRNA-1
ACOC_0000126901	ACOC_0000126901-mRNA-1
ACOC_0001223701	ACOC_0001223701-mRNA-1
ACOC_0001223801	ACOC_0001223801-mRNA-1
ACOC_0001225301	ACOC_0001225301-mRNA-1
ACOC_0001226101	ACOC_0001226101-mRNA-1
ACOC_0001227801	ACOC_0001227801-mRNA-1
ACOC_0001227901	ACOC_0001227901-mRNA-1
ACOC_0000127201	ACOC_0000127201-mRNA-1
ACOC_0001229001	ACOC_0001229001-mRNA-1
ACOC_0001229401	ACOC_0001229401-mRNA-1
ACOC_0000001201	ACOC_0000001201-mRNA-1
ACOC_0001229701	ACOC_0001229701-mRNA-1
ACOC_0001231801	ACOC_0001231801-mRNA-1
ACOC_0001231901	ACOC_0001231901-mRNA-1
ACOC_0001232501	ACOC_0001232501-mRNA-1
ACOC_0000127601	ACOC_0000127601-mRNA-1
ACOC_0001232801	ACOC_0001232801-mRNA-1
ACOC_0001233001	ACOC_0001233001-mRNA-1
ACOC_0000127901	ACOC_0000127901-mRNA-1
ACOC_0001233901	ACOC_0001233901-mRNA-1
ACOC_0001234401	ACOC_0001234401-mRNA-1
ACOC_0000128101	ACOC_0000128101-mRNA-1
ACOC_0001237101	ACOC_0001237101-mRNA-1
ACOC_0000128301	ACOC_0000128301-mRNA-1
ACOC_0001237901	ACOC_0001237901-mRNA-1
ACOC_0001238501	ACOC_0001238501-mRNA-1
ACOC_0000128401	ACOC_0000128401-mRNA-1
ACOC_0001239301	ACOC_0001239301-mRNA-1
ACOC_0001241501	ACOC_0001241501-mRNA-1
ACOC_0001241801	ACOC_0001241801-mRNA-1
ACOC_0000128801	ACOC_0000128801-mRNA-1
ACOC_0001248301	ACOC_0001248301-mRNA-1
ACOC_0001250101	ACOC_0001250101-mRNA-1
ACOC_0001250601	ACOC_0001250601-mRNA-1
ACOC_0001250901	ACOC_0001250901-mRNA-1
ACOC_0001251601	ACOC_0001251601-mRNA-1
ACOC_0001253201	ACOC_0001253201-mRNA-1
ACOC_0001253401	ACOC_0001253401-mRNA-1
ACOC_0001253801	ACOC_0001253801-mRNA-1
ACOC_0001254101	ACOC_0001254101-mRNA-1
ACOC_0001254901	ACOC_0001254901-mRNA-1
ACOC_0001255701	ACOC_0001255701-mRNA-1
ACOC_0001255901	ACOC_0001255901-mRNA-1
ACOC_0001256001	ACOC_0001256001-mRNA-1
ACOC_0001256101	ACOC_0001256101-mRNA-1
ACOC_0001257701	ACOC_0001257701-mRNA-1
ACOC_0001258201	ACOC_0001258201-mRNA-1
ACOC_0001258501	ACOC_0001258501-mRNA-1
ACOC_0001260001	ACOC_0001260001-mRNA-1
ACOC_0001261201	ACOC_0001261201-mRNA-1
ACOC_0001261901	ACOC_0001261901-mRNA-1
ACOC_0001263301	ACOC_0001263301-mRNA-1
ACOC_0001264701	ACOC_0001264701-mRNA-1
ACOC_0001266201	ACOC_0001266201-mRNA-1
ACOC_0001267301	ACOC_0001267301-mRNA-1
ACOC_0001267401	ACOC_0001267401-mRNA-1
ACOC_0001268901	ACOC_0001268901-mRNA-1
ACOC_0001270101	ACOC_0001270101-mRNA-1
ACOC_0001270301	ACOC_0001270301-mRNA-1
ACOC_0001270701	ACOC_0001270701-mRNA-1
ACOC_0001272001	ACOC_0001272001-mRNA-1
ACOC_0001272101	ACOC_0001272101-mRNA-1
ACOC_0001273201	ACOC_0001273201-mRNA-1
ACOC_0001273501	ACOC_0001273501-mRNA-1
ACOC_0001273601	ACOC_0001273601-mRNA-1
ACOC_0001273701	ACOC_0001273701-mRNA-1
ACOC_0001273801	ACOC_0001273801-mRNA-1
ACOC_0001274101	ACOC_0001274101-mRNA-1
ACOC_0001274401	ACOC_0001274401-mRNA-1
ACOC_0001276701	ACOC_0001276701-mRNA-1
ACOC_0001276801	ACOC_0001276801-mRNA-1
ACOC_0001277001	ACOC_0001277001-mRNA-1
ACOC_0001277101	ACOC_0001277101-mRNA-1
ACOC_0001277801	ACOC_0001277801-mRNA-1
ACOC_0001278101	ACOC_0001278101-mRNA-1
ACOC_0001279101	ACOC_0001279101-mRNA-1
ACOC_0001279601	ACOC_0001279601-mRNA-1
ACOC_0001279701	ACOC_0001279701-mRNA-1
ACOC_0001280701	ACOC_0001280701-mRNA-1
ACOC_0001281501	ACOC_0001281501-mRNA-1
ACOC_0001281901	ACOC_0001281901-mRNA-1
ACOC_0001282101	ACOC_0001282101-mRNA-1
ACOC_0001282201	ACOC_0001282201-mRNA-1
ACOC_0001282301	ACOC_0001282301-mRNA-1
ACOC_0001282701	ACOC_0001282701-mRNA-1
ACOC_0001283801	ACOC_0001283801-mRNA-1
ACOC_0001284401	ACOC_0001284401-mRNA-1
ACOC_0001284901	ACOC_0001284901-mRNA-1
ACOC_0001287201	ACOC_0001287201-mRNA-1
ACOC_0001288301	ACOC_0001288301-mRNA-1
ACOC_0001288501	ACOC_0001288501-mRNA-1
ACOC_0001289901	ACOC_0001289901-mRNA-1
ACOC_0001290201	ACOC_0001290201-mRNA-1
ACOC_0001291001	ACOC_0001291001-mRNA-1
ACOC_0001291101	ACOC_0001291101-mRNA-1
ACOC_0001291701	ACOC_0001291701-mRNA-1
ACOC_0001292101	ACOC_0001292101-mRNA-1
ACOC_0001292501	ACOC_0001292501-mRNA-1
ACOC_0001294401	ACOC_0001294401-mRNA-1
ACOC_0001295201	ACOC_0001295201-mRNA-1
ACOC_0001295601	ACOC_0001295601-mRNA-1
ACOC_0001296601	ACOC_0001296601-mRNA-1
ACOC_0001298101	ACOC_0001298101-mRNA-1
ACOC_0001298801	ACOC_0001298801-mRNA-1
ACOC_0001298901	ACOC_0001298901-mRNA-1
ACOC_0001300301	ACOC_0001300301-mRNA-1
ACOC_0001300801	ACOC_0001300801-mRNA-1
ACOC_0001301401	ACOC_0001301401-mRNA-1
ACOC_0001302301	ACOC_0001302301-mRNA-1
ACOC_0001303701	ACOC_0001303701-mRNA-1
ACOC_0001304001	ACOC_0001304001-mRNA-1
ACOC_0001304401	ACOC_0001304401-mRNA-1
ACOC_0001306001	ACOC_0001306001-mRNA-1
ACOC_0001306101	ACOC_0001306101-mRNA-1
ACOC_0001307101	ACOC_0001307101-mRNA-1
ACOC_0001308001	ACOC_0001308001-mRNA-1
ACOC_0001308301	ACOC_0001308301-mRNA-1
ACOC_0001309601	ACOC_0001309601-mRNA-1
ACOC_0001310501	ACOC_0001310501-mRNA-1
ACOC_0001311801	ACOC_0001311801-mRNA-1
ACOC_0001312401	ACOC_0001312401-mRNA-1
ACOC_0001313301	ACOC_0001313301-mRNA-1
ACOC_0001314101	ACOC_0001314101-mRNA-1
ACOC_0001314301	ACOC_0001314301-mRNA-1
ACOC_0001315501	ACOC_0001315501-mRNA-1
ACOC_0000136901	ACOC_0000136901-mRNA-1
ACOC_0001316101	ACOC_0001316101-mRNA-1
ACOC_0001318301	ACOC_0001318301-mRNA-1
ACOC_0001318501	ACOC_0001318501-mRNA-1
ACOC_0001318701	ACOC_0001318701-mRNA-1
ACOC_0000014701	ACOC_0000014701-mRNA-1
ACOC_0001319101	ACOC_0001319101-mRNA-1
ACOC_0001320901	ACOC_0001320901-mRNA-1
ACOC_0001321401	ACOC_0001321401-mRNA-1
ACOC_0001321801	ACOC_0001321801-mRNA-1
ACOC_0001323001	ACOC_0001323001-mRNA-1
ACOC_0001323101	ACOC_0001323101-mRNA-1
ACOC_0001323201	ACOC_0001323201-mRNA-1
ACOC_0001324601	ACOC_0001324601-mRNA-1
ACOC_0001324801	ACOC_0001324801-mRNA-1
ACOC_0001324901	ACOC_0001324901-mRNA-1
ACOC_0001325601	ACOC_0001325601-mRNA-1
ACOC_0001327301	ACOC_0001327301-mRNA-1
ACOC_0001327601	ACOC_0001327601-mRNA-1
ACOC_0001328101	ACOC_0001328101-mRNA-1
ACOC_0000138501	ACOC_0000138501-mRNA-1
ACOC_0001329501	ACOC_0001329501-mRNA-1
ACOC_0001329601	ACOC_0001329601-mRNA-1
ACOC_0001330001	ACOC_0001330001-mRNA-1
ACOC_0001330401	ACOC_0001330401-mRNA-1
ACOC_0001330601	ACOC_0001330601-mRNA-1
ACOC_0001331201	ACOC_0001331201-mRNA-1
ACOC_0001331401	ACOC_0001331401-mRNA-1
ACOC_0001331801	ACOC_0001331801-mRNA-1
ACOC_0001332201	ACOC_0001332201-mRNA-1
ACOC_0001333501	ACOC_0001333501-mRNA-1
ACOC_0001333601	ACOC_0001333601-mRNA-1
ACOC_0001333801	ACOC_0001333801-mRNA-1
ACOC_0001334201	ACOC_0001334201-mRNA-1
ACOC_0001334401	ACOC_0001334401-mRNA-1
ACOC_0001334601	ACOC_0001334601-mRNA-1
ACOC_0000139001	ACOC_0000139001-mRNA-1
ACOC_0001336101	ACOC_0001336101-mRNA-1
ACOC_0001336301	ACOC_0001336301-mRNA-1
ACOC_0001337101	ACOC_0001337101-mRNA-1
ACOC_0001337201	ACOC_0001337201-mRNA-1
ACOC_0001337801	ACOC_0001337801-mRNA-1
ACOC_0001338001	ACOC_0001338001-mRNA-1
ACOC_0001338501	ACOC_0001338501-mRNA-1
ACOC_0001338601	ACOC_0001338601-mRNA-1
ACOC_0000139201	ACOC_0000139201-mRNA-1
ACOC_0001338901	ACOC_0001338901-mRNA-1
ACOC_0001340201	ACOC_0001340201-mRNA-1
ACOC_0001340401	ACOC_0001340401-mRNA-1
ACOC_0000014901	ACOC_0000014901-mRNA-1
ACOC_0000140801	ACOC_0000140801-mRNA-1
ACOC_0000141001	ACOC_0000141001-mRNA-1
ACOC_0000141601	ACOC_0000141601-mRNA-1
ACOC_0000142201	ACOC_0000142201-mRNA-1
ACOC_0000143601	ACOC_0000143601-mRNA-1
ACOC_0000143801	ACOC_0000143801-mRNA-1
ACOC_0000015501	ACOC_0000015501-mRNA-1
ACOC_0000144301	ACOC_0000144301-mRNA-1
ACOC_0000146301	ACOC_0000146301-mRNA-1
ACOC_0000146701	ACOC_0000146701-mRNA-1
ACOC_0000146801	ACOC_0000146801-mRNA-1
ACOC_0000147301	ACOC_0000147301-mRNA-1
ACOC_0000148201	ACOC_0000148201-mRNA-1
ACOC_0000148601	ACOC_0000148601-mRNA-1
ACOC_0000149901	ACOC_0000149901-mRNA-1
ACOC_0000150101	ACOC_0000150101-mRNA-1
ACOC_0000150701	ACOC_0000150701-mRNA-1
ACOC_0000151101	ACOC_0000151101-mRNA-1
ACOC_0000152101	ACOC_0000152101-mRNA-1
ACOC_0000153601	ACOC_0000153601-mRNA-1
ACOC_0000153901	ACOC_0000153901-mRNA-1
ACOC_0000154001	ACOC_0000154001-mRNA-1
ACOC_0000016601	ACOC_0000016601-mRNA-1
ACOC_0000154601	ACOC_0000154601-mRNA-1
ACOC_0000154701	ACOC_0000154701-mRNA-1
ACOC_0000158301	ACOC_0000158301-mRNA-1
ACOC_0000001501	ACOC_0000001501-mRNA-1
ACOC_0000159801	ACOC_0000159801-mRNA-1
ACOC_0000163901	ACOC_0000163901-mRNA-1
ACOC_0000164701	ACOC_0000164701-mRNA-1
ACOC_0000165001	ACOC_0000165001-mRNA-1
ACOC_0000167901	ACOC_0000167901-mRNA-1
ACOC_0000169101	ACOC_0000169101-mRNA-1
ACOC_0000169701	ACOC_0000169701-mRNA-1
ACOC_0000171401	ACOC_0000171401-mRNA-1
ACOC_0000172801	ACOC_0000172801-mRNA-1
ACOC_0000173601	ACOC_0000173601-mRNA-1
ACOC_0000175801	ACOC_0000175801-mRNA-1
ACOC_0000176001	ACOC_0000176001-mRNA-1
ACOC_0000176401	ACOC_0000176401-mRNA-1
ACOC_0000176501	ACOC_0000176501-mRNA-1
ACOC_0000177501	ACOC_0000177501-mRNA-1
ACOC_0000178801	ACOC_0000178801-mRNA-1
ACOC_0000179501	ACOC_0000179501-mRNA-1
ACOC_0000179801	ACOC_0000179801-mRNA-1
ACOC_0000181501	ACOC_0000181501-mRNA-1
ACOC_0000019401	ACOC_0000019401-mRNA-1
ACOC_0000182801	ACOC_0000182801-mRNA-1
ACOC_0000183201	ACOC_0000183201-mRNA-1
ACOC_0000183301	ACOC_0000183301-mRNA-1
ACOC_0000183401	ACOC_0000183401-mRNA-1
ACOC_0000184101	ACOC_0000184101-mRNA-1
ACOC_0000184501	ACOC_0000184501-mRNA-1
ACOC_0000184701	ACOC_0000184701-mRNA-1
ACOC_0000185201	ACOC_0000185201-mRNA-1
ACOC_0000185301	ACOC_0000185301-mRNA-1
ACOC_0000185401	ACOC_0000185401-mRNA-1
ACOC_0000185501	ACOC_0000185501-mRNA-1
ACOC_0000186001	ACOC_0000186001-mRNA-1
ACOC_0000186201	ACOC_0000186201-mRNA-1
ACOC_0000186401	ACOC_0000186401-mRNA-1
ACOC_0000186801	ACOC_0000186801-mRNA-1
ACOC_0000187501	ACOC_0000187501-mRNA-1
ACOC_0000188201	ACOC_0000188201-mRNA-1
ACOC_0000188501	ACOC_0000188501-mRNA-1
ACOC_0000020101	ACOC_0000020101-mRNA-1
ACOC_0000189301	ACOC_0000189301-mRNA-1
ACOC_0000189701	ACOC_0000189701-mRNA-1
ACOC_0000189901	ACOC_0000189901-mRNA-1
ACOC_0000192601	ACOC_0000192601-mRNA-1
ACOC_0000194401	ACOC_0000194401-mRNA-1
ACOC_0000194601	ACOC_0000194601-mRNA-1
ACOC_0000195501	ACOC_0000195501-mRNA-1
ACOC_0000195801	ACOC_0000195801-mRNA-1
ACOC_0000198801	ACOC_0000198801-mRNA-1
ACOC_0000199001	ACOC_0000199001-mRNA-1
ACOC_0000200201	ACOC_0000200201-mRNA-1
ACOC_0000201101	ACOC_0000201101-mRNA-1
ACOC_0000201801	ACOC_0000201801-mRNA-1
ACOC_0000202001	ACOC_0000202001-mRNA-1
ACOC_0000203401	ACOC_0000203401-mRNA-1
ACOC_0000204201	ACOC_0000204201-mRNA-1
ACOC_0000206501	ACOC_0000206501-mRNA-1
ACOC_0000207401	ACOC_0000207401-mRNA-1
ACOC_0000208001	ACOC_0000208001-mRNA-1
ACOC_0000208301	ACOC_0000208301-mRNA-1
ACOC_0000208601	ACOC_0000208601-mRNA-1
ACOC_0000208801	ACOC_0000208801-mRNA-1
ACOC_0000022101	ACOC_0000022101-mRNA-1
ACOC_0000209901	ACOC_0000209901-mRNA-1
ACOC_0000210001	ACOC_0000210001-mRNA-1
ACOC_0000210401	ACOC_0000210401-mRNA-1
ACOC_0000210801	ACOC_0000210801-mRNA-1
ACOC_0000211201	ACOC_0000211201-mRNA-1
ACOC_0000212201	ACOC_0000212201-mRNA-1
ACOC_0000212401	ACOC_0000212401-mRNA-1
ACOC_0000213401	ACOC_0000213401-mRNA-1
ACOC_0000213501	ACOC_0000213501-mRNA-1
ACOC_0000022601	ACOC_0000022601-mRNA-1
ACOC_0000214801	ACOC_0000214801-mRNA-1
ACOC_0000215701	ACOC_0000215701-mRNA-1
ACOC_0000216201	ACOC_0000216201-mRNA-1
ACOC_0000217801	ACOC_0000217801-mRNA-1
ACOC_0000218301	ACOC_0000218301-mRNA-1
ACOC_0000219101	ACOC_0000219101-mRNA-1
ACOC_0000220601	ACOC_0000220601-mRNA-1
ACOC_0000221801	ACOC_0000221801-mRNA-1
ACOC_0000023201	ACOC_0000023201-mRNA-1
ACOC_0000222801	ACOC_0000222801-mRNA-1
ACOC_0000223701	ACOC_0000223701-mRNA-1
ACOC_0000224001	ACOC_0000224001-mRNA-1
ACOC_0000224201	ACOC_0000224201-mRNA-1
ACOC_0000225301	ACOC_0000225301-mRNA-1
ACOC_0000225401	ACOC_0000225401-mRNA-1
ACOC_0000023501	ACOC_0000023501-mRNA-1
ACOC_0000226301	ACOC_0000226301-mRNA-1
ACOC_0000226601	ACOC_0000226601-mRNA-1
ACOC_0000226901	ACOC_0000226901-mRNA-1
ACOC_0000228201	ACOC_0000228201-mRNA-1
ACOC_0000228601	ACOC_0000228601-mRNA-1
ACOC_0000229301	ACOC_0000229301-mRNA-1
ACOC_0000229401	ACOC_0000229401-mRNA-1
ACOC_0000231401	ACOC_0000231401-mRNA-1
ACOC_0000231601	ACOC_0000231601-mRNA-1
ACOC_0000232301	ACOC_0000232301-mRNA-1
ACOC_0000234501	ACOC_0000234501-mRNA-1
ACOC_0000235301	ACOC_0000235301-mRNA-1
ACOC_0000235701	ACOC_0000235701-mRNA-1
ACOC_0000236001	ACOC_0000236001-mRNA-1
ACOC_0000236301	ACOC_0000236301-mRNA-1
ACOC_0000236601	ACOC_0000236601-mRNA-1
ACOC_0000238601	ACOC_0000238601-mRNA-1
ACOC_0000238701	ACOC_0000238701-mRNA-1
ACOC_0000239301	ACOC_0000239301-mRNA-1
ACOC_0000241001	ACOC_0000241001-mRNA-1
ACOC_0000024901	ACOC_0000024901-mRNA-1
ACOC_0000241201	ACOC_0000241201-mRNA-1
ACOC_0000241501	ACOC_0000241501-mRNA-1
ACOC_0000243001	ACOC_0000243001-mRNA-1
ACOC_0000243901	ACOC_0000243901-mRNA-1
ACOC_0000244201	ACOC_0000244201-mRNA-1
ACOC_0000244301	ACOC_0000244301-mRNA-1
ACOC_0000246301	ACOC_0000246301-mRNA-1
ACOC_0000248701	ACOC_0000248701-mRNA-1
ACOC_0000250001	ACOC_0000250001-mRNA-1
ACOC_0000026501	ACOC_0000026501-mRNA-1
ACOC_0000253701	ACOC_0000253701-mRNA-1
ACOC_0000254201	ACOC_0000254201-mRNA-1
ACOC_0000026601	ACOC_0000026601-mRNA-1
ACOC_0000254801	ACOC_0000254801-mRNA-1
ACOC_0000256301	ACOC_0000256301-mRNA-1
ACOC_0000256501	ACOC_0000256501-mRNA-1
ACOC_0000256801	ACOC_0000256801-mRNA-1
ACOC_0000026801	ACOC_0000026801-mRNA-1
ACOC_0000258101	ACOC_0000258101-mRNA-1
ACOC_0000260801	ACOC_0000260801-mRNA-1
ACOC_0000261601	ACOC_0000261601-mRNA-1
ACOC_0000261801	ACOC_0000261801-mRNA-1
ACOC_0000027101	ACOC_0000027101-mRNA-1
ACOC_0000263201	ACOC_0000263201-mRNA-1
ACOC_0000266301	ACOC_0000266301-mRNA-1
ACOC_0000027801	ACOC_0000027801-mRNA-1
ACOC_0000267901	ACOC_0000267901-mRNA-1
ACOC_0000268701	ACOC_0000268701-mRNA-1
ACOC_0000269001	ACOC_0000269001-mRNA-1
ACOC_0000269601	ACOC_0000269601-mRNA-1
ACOC_0000269901	ACOC_0000269901-mRNA-1
ACOC_0000270101	ACOC_0000270101-mRNA-1
ACOC_0000002701	ACOC_0000002701-mRNA-1
ACOC_0000272301	ACOC_0000272301-mRNA-1
ACOC_0000272701	ACOC_0000272701-mRNA-1
ACOC_0000272801	ACOC_0000272801-mRNA-1
ACOC_0000273801	ACOC_0000273801-mRNA-1
ACOC_0000275201	ACOC_0000275201-mRNA-1
ACOC_0000275801	ACOC_0000275801-mRNA-1
ACOC_0000276501	ACOC_0000276501-mRNA-1
ACOC_0000276601	ACOC_0000276601-mRNA-1
ACOC_0000276801	ACOC_0000276801-mRNA-1
ACOC_0000029001	ACOC_0000029001-mRNA-1
ACOC_0000029101	ACOC_0000029101-mRNA-1
ACOC_0000278201	ACOC_0000278201-mRNA-1
ACOC_0000280701	ACOC_0000280701-mRNA-1
ACOC_0000280801	ACOC_0000280801-mRNA-1
ACOC_0000282801	ACOC_0000282801-mRNA-1
ACOC_0000283801	ACOC_0000283801-mRNA-1
ACOC_0000284201	ACOC_0000284201-mRNA-1
ACOC_0000286101	ACOC_0000286101-mRNA-1
ACOC_0000286301	ACOC_0000286301-mRNA-1
ACOC_0000286501	ACOC_0000286501-mRNA-1
ACOC_0000287401	ACOC_0000287401-mRNA-1
ACOC_0000288001	ACOC_0000288001-mRNA-1
ACOC_0000288501	ACOC_0000288501-mRNA-1
ACOC_0000289501	ACOC_0000289501-mRNA-1
ACOC_0000290001	ACOC_0000290001-mRNA-1
ACOC_0000290601	ACOC_0000290601-mRNA-1
ACOC_0000291301	ACOC_0000291301-mRNA-1
ACOC_0000291701	ACOC_0000291701-mRNA-1
ACOC_0000291801	ACOC_0000291801-mRNA-1
ACOC_0000030701	ACOC_0000030701-mRNA-1
ACOC_0000030801	ACOC_0000030801-mRNA-1
ACOC_0000298301	ACOC_0000298301-mRNA-1
ACOC_0000299401	ACOC_0000299401-mRNA-1
ACOC_0000299501	ACOC_0000299501-mRNA-1
ACOC_0000300201	ACOC_0000300201-mRNA-1
ACOC_0000300301	ACOC_0000300301-mRNA-1
ACOC_0000300701	ACOC_0000300701-mRNA-1
ACOC_0000301601	ACOC_0000301601-mRNA-1
ACOC_0000301701	ACOC_0000301701-mRNA-1
ACOC_0000301901	ACOC_0000301901-mRNA-1
ACOC_0000302401	ACOC_0000302401-mRNA-1
ACOC_0000304601	ACOC_0000304601-mRNA-1
ACOC_0000304801	ACOC_0000304801-mRNA-1
ACOC_0000306101	ACOC_0000306101-mRNA-1
ACOC_0000306201	ACOC_0000306201-mRNA-1
ACOC_0000307101	ACOC_0000307101-mRNA-1
ACOC_0000307201	ACOC_0000307201-mRNA-1
ACOC_0000000201	ACOC_0000000201-mRNA-1
ACOC_0000309101	ACOC_0000309101-mRNA-1
ACOC_0000310901	ACOC_0000310901-mRNA-1
ACOC_0000032301	ACOC_0000032301-mRNA-1
ACOC_0000032601	ACOC_0000032601-mRNA-1
ACOC_0000315301	ACOC_0000315301-mRNA-1
ACOC_0000033001	ACOC_0000033001-mRNA-1
ACOC_0000315901	ACOC_0000315901-mRNA-1
ACOC_0000316401	ACOC_0000316401-mRNA-1
ACOC_0000316701	ACOC_0000316701-mRNA-1
ACOC_0000317401	ACOC_0000317401-mRNA-1
ACOC_0000318301	ACOC_0000318301-mRNA-1
ACOC_0000319001	ACOC_0000319001-mRNA-1
ACOC_0000319501	ACOC_0000319501-mRNA-1
ACOC_0000033601	ACOC_0000033601-mRNA-1
ACOC_0000321901	ACOC_0000321901-mRNA-1
ACOC_0000323701	ACOC_0000323701-mRNA-1
ACOC_0000325001	ACOC_0000325001-mRNA-1
ACOC_0000326701	ACOC_0000326701-mRNA-1
ACOC_0000326801	ACOC_0000326801-mRNA-1
ACOC_0000327201	ACOC_0000327201-mRNA-1
ACOC_0000327401	ACOC_0000327401-mRNA-1
ACOC_0000328101	ACOC_0000328101-mRNA-1
ACOC_0000328501	ACOC_0000328501-mRNA-1
ACOC_0000329901	ACOC_0000329901-mRNA-1
ACOC_0000034601	ACOC_0000034601-mRNA-1
ACOC_0000330001	ACOC_0000330001-mRNA-1
ACOC_0000334301	ACOC_0000334301-mRNA-1
ACOC_0000334601	ACOC_0000334601-mRNA-1
ACOC_0000335001	ACOC_0000335001-mRNA-1
ACOC_0000335901	ACOC_0000335901-mRNA-1
ACOC_0000337101	ACOC_0000337101-mRNA-1
ACOC_0000340201	ACOC_0000340201-mRNA-1
ACOC_0000340301	ACOC_0000340301-mRNA-1
ACOC_0000341301	ACOC_0000341301-mRNA-1
ACOC_0000341401	ACOC_0000341401-mRNA-1
ACOC_0000342101	ACOC_0000342101-mRNA-1
ACOC_0000342801	ACOC_0000342801-mRNA-1
ACOC_0000342901	ACOC_0000342901-mRNA-1
ACOC_0000343301	ACOC_0000343301-mRNA-1
ACOC_0000035701	ACOC_0000035701-mRNA-1
ACOC_0000344801	ACOC_0000344801-mRNA-1
ACOC_0000345101	ACOC_0000345101-mRNA-1
ACOC_0000035801	ACOC_0000035801-mRNA-1
ACOC_0000345601	ACOC_0000345601-mRNA-1
ACOC_0000346201	ACOC_0000346201-mRNA-1
ACOC_0000347901	ACOC_0000347901-mRNA-1
ACOC_0000036201	ACOC_0000036201-mRNA-1
ACOC_0000348901	ACOC_0000348901-mRNA-1
ACOC_0000349301	ACOC_0000349301-mRNA-1
ACOC_0000349401	ACOC_0000349401-mRNA-1
ACOC_0000349901	ACOC_0000349901-mRNA-1
ACOC_0000350101	ACOC_0000350101-mRNA-1
ACOC_0000351001	ACOC_0000351001-mRNA-1
ACOC_0000351401	ACOC_0000351401-mRNA-1
ACOC_0000352101	ACOC_0000352101-mRNA-1
ACOC_0000353101	ACOC_0000353101-mRNA-1
ACOC_0000354201	ACOC_0000354201-mRNA-1
ACOC_0000355201	ACOC_0000355201-mRNA-1
ACOC_0000358501	ACOC_0000358501-mRNA-1
ACOC_0000359801	ACOC_0000359801-mRNA-1
ACOC_0000360601	ACOC_0000360601-mRNA-1
ACOC_0000361401	ACOC_0000361401-mRNA-1
ACOC_0000362901	ACOC_0000362901-mRNA-1
ACOC_0000363401	ACOC_0000363401-mRNA-1
ACOC_0000004101	ACOC_0000004101-mRNA-1
ACOC_0000364801	ACOC_0000364801-mRNA-1
ACOC_0000037701	ACOC_0000037701-mRNA-1
ACOC_0000365901	ACOC_0000365901-mRNA-1
ACOC_0000366401	ACOC_0000366401-mRNA-1
ACOC_0000368401	ACOC_0000368401-mRNA-1
ACOC_0000368801	ACOC_0000368801-mRNA-1
ACOC_0000370201	ACOC_0000370201-mRNA-1
ACOC_0000373001	ACOC_0000373001-mRNA-1
ACOC_0000374401	ACOC_0000374401-mRNA-1
ACOC_0000376201	ACOC_0000376201-mRNA-1
ACOC_0000039001	ACOC_0000039001-mRNA-1
ACOC_0000376601	ACOC_0000376601-mRNA-1
ACOC_0000376901	ACOC_0000376901-mRNA-1
ACOC_0000039401	ACOC_0000039401-mRNA-1
ACOC_0000378101	ACOC_0000378101-mRNA-1
ACOC_0000378301	ACOC_0000378301-mRNA-1
ACOC_0000379201	ACOC_0000379201-mRNA-1
ACOC_0000379301	ACOC_0000379301-mRNA-1
ACOC_0000039701	ACOC_0000039701-mRNA-1
ACOC_0000379601	ACOC_0000379601-mRNA-1
ACOC_0000379701	ACOC_0000379701-mRNA-1
ACOC_0000380601	ACOC_0000380601-mRNA-1
ACOC_0000380701	ACOC_0000380701-mRNA-1
ACOC_0000381001	ACOC_0000381001-mRNA-1
ACOC_0000381601	ACOC_0000381601-mRNA-1
ACOC_0000381801	ACOC_0000381801-mRNA-1
ACOC_0000383201	ACOC_0000383201-mRNA-1
ACOC_0000383601	ACOC_0000383601-mRNA-1
ACOC_0000383801	ACOC_0000383801-mRNA-1
ACOC_0000383901	ACOC_0000383901-mRNA-1
ACOC_0000040101	ACOC_0000040101-mRNA-1
ACOC_0000386401	ACOC_0000386401-mRNA-1
ACOC_0000386901	ACOC_0000386901-mRNA-1
ACOC_0000387401	ACOC_0000387401-mRNA-1
ACOC_0000388201	ACOC_0000388201-mRNA-1
ACOC_0000388601	ACOC_0000388601-mRNA-1
ACOC_0000389501	ACOC_0000389501-mRNA-1
ACOC_0000390001	ACOC_0000390001-mRNA-1
ACOC_0000390301	ACOC_0000390301-mRNA-1
ACOC_0000390901	ACOC_0000390901-mRNA-1
ACOC_0000391101	ACOC_0000391101-mRNA-1
ACOC_0000391701	ACOC_0000391701-mRNA-1
ACOC_0000392001	ACOC_0000392001-mRNA-1
ACOC_0000393201	ACOC_0000393201-mRNA-1
ACOC_0000393301	ACOC_0000393301-mRNA-1
ACOC_0000393501	ACOC_0000393501-mRNA-1
ACOC_0000394101	ACOC_0000394101-mRNA-1
ACOC_0000396701	ACOC_0000396701-mRNA-1
ACOC_0000397001	ACOC_0000397001-mRNA-1
ACOC_0000397201	ACOC_0000397201-mRNA-1
ACOC_0000397301	ACOC_0000397301-mRNA-1
ACOC_0000398301	ACOC_0000398301-mRNA-1
ACOC_0000398701	ACOC_0000398701-mRNA-1
ACOC_0000399701	ACOC_0000399701-mRNA-1
ACOC_0000401401	ACOC_0000401401-mRNA-1
ACOC_0000401601	ACOC_0000401601-mRNA-1
ACOC_0000402201	ACOC_0000402201-mRNA-1
ACOC_0000403001	ACOC_0000403001-mRNA-1
ACOC_0000403101	ACOC_0000403101-mRNA-1
ACOC_0000403701	ACOC_0000403701-mRNA-1
ACOC_0000403901	ACOC_0000403901-mRNA-1
ACOC_0000404301	ACOC_0000404301-mRNA-1
ACOC_0000404701	ACOC_0000404701-mRNA-1
ACOC_0000405101	ACOC_0000405101-mRNA-1
ACOC_0000043601	ACOC_0000043601-mRNA-1
ACOC_0000405701	ACOC_0000405701-mRNA-1
ACOC_0000405901	ACOC_0000405901-mRNA-1
ACOC_0000406201	ACOC_0000406201-mRNA-1
ACOC_0000406801	ACOC_0000406801-mRNA-1
ACOC_0000407101	ACOC_0000407101-mRNA-1
ACOC_0000407501	ACOC_0000407501-mRNA-1
ACOC_0000407901	ACOC_0000407901-mRNA-1
ACOC_0000004701	ACOC_0000004701-mRNA-1
ACOC_0000408401	ACOC_0000408401-mRNA-1
ACOC_0000043901	ACOC_0000043901-mRNA-1
ACOC_0000409001	ACOC_0000409001-mRNA-1
ACOC_0000410401	ACOC_0000410401-mRNA-1
ACOC_0000410601	ACOC_0000410601-mRNA-1
ACOC_0000411001	ACOC_0000411001-mRNA-1
ACOC_0000411101	ACOC_0000411101-mRNA-1
ACOC_0000411401	ACOC_0000411401-mRNA-1
ACOC_0000411501	ACOC_0000411501-mRNA-1
ACOC_0000044201	ACOC_0000044201-mRNA-1
ACOC_0000411901	ACOC_0000411901-mRNA-1
ACOC_0000412401	ACOC_0000412401-mRNA-1
ACOC_0000412801	ACOC_0000412801-mRNA-1
ACOC_0000412901	ACOC_0000412901-mRNA-1
ACOC_0000413301	ACOC_0000413301-mRNA-1
ACOC_0000413901	ACOC_0000413901-mRNA-1
ACOC_0000414001	ACOC_0000414001-mRNA-1
ACOC_0000414201	ACOC_0000414201-mRNA-1
ACOC_0000414401	ACOC_0000414401-mRNA-1
ACOC_0000414601	ACOC_0000414601-mRNA-1
ACOC_0000414701	ACOC_0000414701-mRNA-1
ACOC_0000414801	ACOC_0000414801-mRNA-1
ACOC_0000414901	ACOC_0000414901-mRNA-1
ACOC_0000415001	ACOC_0000415001-mRNA-1
ACOC_0000415501	ACOC_0000415501-mRNA-1
ACOC_0000415901	ACOC_0000415901-mRNA-1
ACOC_0000044501	ACOC_0000044501-mRNA-1
ACOC_0000416301	ACOC_0000416301-mRNA-1
ACOC_0000004901	ACOC_0000004901-mRNA-1
ACOC_0000417001	ACOC_0000417001-mRNA-1
ACOC_0000417101	ACOC_0000417101-mRNA-1
ACOC_0000417401	ACOC_0000417401-mRNA-1
ACOC_0000418301	ACOC_0000418301-mRNA-1
ACOC_0000418401	ACOC_0000418401-mRNA-1
ACOC_0000418501	ACOC_0000418501-mRNA-1
ACOC_0000419101	ACOC_0000419101-mRNA-1
ACOC_0000419601	ACOC_0000419601-mRNA-1
ACOC_0000420301	ACOC_0000420301-mRNA-1
ACOC_0000420601	ACOC_0000420601-mRNA-1
ACOC_0000421401	ACOC_0000421401-mRNA-1
ACOC_0000422501	ACOC_0000422501-mRNA-1
ACOC_0000045301	ACOC_0000045301-mRNA-1
ACOC_0000423801	ACOC_0000423801-mRNA-1
ACOC_0000424901	ACOC_0000424901-mRNA-1
ACOC_0000425501	ACOC_0000425501-mRNA-1
ACOC_0000426301	ACOC_0000426301-mRNA-1
ACOC_0000045901	ACOC_0000045901-mRNA-1
ACOC_0000427601	ACOC_0000427601-mRNA-1
ACOC_0000427801	ACOC_0000427801-mRNA-1
ACOC_0000428201	ACOC_0000428201-mRNA-1
ACOC_0000428501	ACOC_0000428501-mRNA-1
ACOC_0000428601	ACOC_0000428601-mRNA-1
ACOC_0000429201	ACOC_0000429201-mRNA-1
ACOC_0000432201	ACOC_0000432201-mRNA-1
ACOC_0000432701	ACOC_0000432701-mRNA-1
ACOC_0000433101	ACOC_0000433101-mRNA-1
ACOC_0000433301	ACOC_0000433301-mRNA-1
ACOC_0000434101	ACOC_0000434101-mRNA-1
ACOC_0000434501	ACOC_0000434501-mRNA-1
ACOC_0000046801	ACOC_0000046801-mRNA-1
ACOC_0000438101	ACOC_0000438101-mRNA-1
ACOC_0000438501	ACOC_0000438501-mRNA-1
ACOC_0000438601	ACOC_0000438601-mRNA-1
ACOC_0000439001	ACOC_0000439001-mRNA-1
ACOC_0000440001	ACOC_0000440001-mRNA-1
ACOC_0000047401	ACOC_0000047401-mRNA-1
ACOC_0000441801	ACOC_0000441801-mRNA-1
ACOC_0000442201	ACOC_0000442201-mRNA-1
ACOC_0000442401	ACOC_0000442401-mRNA-1
ACOC_0000443301	ACOC_0000443301-mRNA-1
ACOC_0000443601	ACOC_0000443601-mRNA-1
ACOC_0000444101	ACOC_0000444101-mRNA-1
ACOC_0000444701	ACOC_0000444701-mRNA-1
ACOC_0000444801	ACOC_0000444801-mRNA-1
ACOC_0000444901	ACOC_0000444901-mRNA-1
ACOC_0000445301	ACOC_0000445301-mRNA-1
ACOC_0000047901	ACOC_0000047901-mRNA-1
ACOC_0000446901	ACOC_0000446901-mRNA-1
ACOC_0000447001	ACOC_0000447001-mRNA-1
ACOC_0000449101	ACOC_0000449101-mRNA-1
ACOC_0000449401	ACOC_0000449401-mRNA-1
ACOC_0000450201	ACOC_0000450201-mRNA-1
ACOC_0000452001	ACOC_0000452001-mRNA-1
ACOC_0000452301	ACOC_0000452301-mRNA-1
ACOC_0000452901	ACOC_0000452901-mRNA-1
ACOC_0000453001	ACOC_0000453001-mRNA-1
ACOC_0000453801	ACOC_0000453801-mRNA-1
ACOC_0000454001	ACOC_0000454001-mRNA-1
ACOC_0000454701	ACOC_0000454701-mRNA-1
ACOC_0000455001	ACOC_0000455001-mRNA-1
ACOC_0000455701	ACOC_0000455701-mRNA-1
ACOC_0000456101	ACOC_0000456101-mRNA-1
ACOC_0000456901	ACOC_0000456901-mRNA-1
ACOC_0000457001	ACOC_0000457001-mRNA-1
ACOC_0000457101	ACOC_0000457101-mRNA-1
ACOC_0000458001	ACOC_0000458001-mRNA-1
ACOC_0000458101	ACOC_0000458101-mRNA-1
ACOC_0000458301	ACOC_0000458301-mRNA-1
ACOC_0000458901	ACOC_0000458901-mRNA-1
ACOC_0000459001	ACOC_0000459001-mRNA-1
ACOC_0000459701	ACOC_0000459701-mRNA-1
ACOC_0000049501	ACOC_0000049501-mRNA-1
ACOC_0000460501	ACOC_0000460501-mRNA-1
ACOC_0000463201	ACOC_0000463201-mRNA-1
ACOC_0000464101	ACOC_0000464101-mRNA-1
ACOC_0000464301	ACOC_0000464301-mRNA-1
ACOC_0000464401	ACOC_0000464401-mRNA-1
ACOC_0000464601	ACOC_0000464601-mRNA-1
ACOC_0000464801	ACOC_0000464801-mRNA-1
ACOC_0000466601	ACOC_0000466601-mRNA-1
ACOC_0000468201	ACOC_0000468201-mRNA-1
ACOC_0000050701	ACOC_0000050701-mRNA-1
ACOC_0000473701	ACOC_0000473701-mRNA-1
ACOC_0000474401	ACOC_0000474401-mRNA-1
ACOC_0000475101	ACOC_0000475101-mRNA-1
ACOC_0000477101	ACOC_0000477101-mRNA-1
ACOC_0000477201	ACOC_0000477201-mRNA-1
ACOC_0000479101	ACOC_0000479101-mRNA-1
ACOC_0000479801	ACOC_0000479801-mRNA-1
ACOC_0000005501	ACOC_0000005501-mRNA-1
ACOC_0000481601	ACOC_0000481601-mRNA-1
ACOC_0000481901	ACOC_0000481901-mRNA-1
ACOC_0000482401	ACOC_0000482401-mRNA-1
ACOC_0000482701	ACOC_0000482701-mRNA-1
ACOC_0000484201	ACOC_0000484201-mRNA-1
ACOC_0000484801	ACOC_0000484801-mRNA-1
ACOC_0000484901	ACOC_0000484901-mRNA-1
ACOC_0000485101	ACOC_0000485101-mRNA-1
ACOC_0000485301	ACOC_0000485301-mRNA-1
ACOC_0000485501	ACOC_0000485501-mRNA-1
ACOC_0000485601	ACOC_0000485601-mRNA-1
ACOC_0000486001	ACOC_0000486001-mRNA-1
ACOC_0000486701	ACOC_0000486701-mRNA-1
ACOC_0000487401	ACOC_0000487401-mRNA-1
ACOC_0000051601	ACOC_0000051601-mRNA-1
ACOC_0000488201	ACOC_0000488201-mRNA-1
ACOC_0000488301	ACOC_0000488301-mRNA-1
ACOC_0000488401	ACOC_0000488401-mRNA-1
ACOC_0000489901	ACOC_0000489901-mRNA-1
ACOC_0000490301	ACOC_0000490301-mRNA-1
ACOC_0000051901	ACOC_0000051901-mRNA-1
ACOC_0000491001	ACOC_0000491001-mRNA-1
ACOC_0000491501	ACOC_0000491501-mRNA-1
ACOC_0000491801	ACOC_0000491801-mRNA-1
ACOC_0000492101	ACOC_0000492101-mRNA-1
ACOC_0000492501	ACOC_0000492501-mRNA-1
ACOC_0000492901	ACOC_0000492901-mRNA-1
ACOC_0000493101	ACOC_0000493101-mRNA-1
ACOC_0000494901	ACOC_0000494901-mRNA-1
ACOC_0000496101	ACOC_0000496101-mRNA-1
ACOC_0000496201	ACOC_0000496201-mRNA-1
ACOC_0000496801	ACOC_0000496801-mRNA-1
ACOC_0000497201	ACOC_0000497201-mRNA-1
ACOC_0000052601	ACOC_0000052601-mRNA-1
ACOC_0000498401	ACOC_0000498401-mRNA-1
ACOC_0000499101	ACOC_0000499101-mRNA-1
ACOC_0000499201	ACOC_0000499201-mRNA-1
ACOC_0000500801	ACOC_0000500801-mRNA-1
ACOC_0000000601	ACOC_0000000601-mRNA-1
ACOC_0000502601	ACOC_0000502601-mRNA-1
ACOC_0000502701	ACOC_0000502701-mRNA-1
ACOC_0000503501	ACOC_0000503501-mRNA-1
ACOC_0000503801	ACOC_0000503801-mRNA-1
ACOC_0000504701	ACOC_0000504701-mRNA-1
ACOC_0000505301	ACOC_0000505301-mRNA-1
ACOC_0000053501	ACOC_0000053501-mRNA-1
ACOC_0000506101	ACOC_0000506101-mRNA-1
ACOC_0000506901	ACOC_0000506901-mRNA-1
ACOC_0000507101	ACOC_0000507101-mRNA-1
ACOC_0000053601	ACOC_0000053601-mRNA-1
ACOC_0000508601	ACOC_0000508601-mRNA-1
ACOC_0000510001	ACOC_0000510001-mRNA-1
ACOC_0000510501	ACOC_0000510501-mRNA-1
ACOC_0000510801	ACOC_0000510801-mRNA-1
ACOC_0000511201	ACOC_0000511201-mRNA-1
ACOC_0000514301	ACOC_0000514301-mRNA-1
ACOC_0000515101	ACOC_0000515101-mRNA-1
ACOC_0000515301	ACOC_0000515301-mRNA-1
ACOC_0000515601	ACOC_0000515601-mRNA-1
ACOC_0000515701	ACOC_0000515701-mRNA-1
ACOC_0000515801	ACOC_0000515801-mRNA-1
ACOC_0000517401	ACOC_0000517401-mRNA-1
ACOC_0000519301	ACOC_0000519301-mRNA-1
ACOC_0000521201	ACOC_0000521201-mRNA-1
ACOC_0000523201	ACOC_0000523201-mRNA-1
ACOC_0000525501	ACOC_0000525501-mRNA-1
ACOC_0000527601	ACOC_0000527601-mRNA-1
ACOC_0000530801	ACOC_0000530801-mRNA-1
ACOC_0000532401	ACOC_0000532401-mRNA-1
ACOC_0000532801	ACOC_0000532801-mRNA-1
ACOC_0000533901	ACOC_0000533901-mRNA-1
ACOC_0000534501	ACOC_0000534501-mRNA-1
ACOC_0000535001	ACOC_0000535001-mRNA-1
ACOC_0000056301	ACOC_0000056301-mRNA-1
ACOC_0000535201	ACOC_0000535201-mRNA-1
ACOC_0000535401	ACOC_0000535401-mRNA-1
ACOC_0000535801	ACOC_0000535801-mRNA-1
ACOC_0000537201	ACOC_0000537201-mRNA-1
ACOC_0000537501	ACOC_0000537501-mRNA-1
ACOC_0000537701	ACOC_0000537701-mRNA-1
ACOC_0000538401	ACOC_0000538401-mRNA-1
ACOC_0000538701	ACOC_0000538701-mRNA-1
ACOC_0000538801	ACOC_0000538801-mRNA-1
ACOC_0000539101	ACOC_0000539101-mRNA-1
ACOC_0000539401	ACOC_0000539401-mRNA-1
ACOC_0000539801	ACOC_0000539801-mRNA-1
ACOC_0000541201	ACOC_0000541201-mRNA-1
ACOC_0000541801	ACOC_0000541801-mRNA-1
ACOC_0000542001	ACOC_0000542001-mRNA-1
ACOC_0000542101	ACOC_0000542101-mRNA-1
ACOC_0000057301	ACOC_0000057301-mRNA-1
ACOC_0000542901	ACOC_0000542901-mRNA-1
ACOC_0000543101	ACOC_0000543101-mRNA-1
ACOC_0000545001	ACOC_0000545001-mRNA-1
ACOC_0000545701	ACOC_0000545701-mRNA-1
ACOC_0000546801	ACOC_0000546801-mRNA-1
ACOC_0000057801	ACOC_0000057801-mRNA-1
ACOC_0000547501	ACOC_0000547501-mRNA-1
ACOC_0000548401	ACOC_0000548401-mRNA-1
ACOC_0000549101	ACOC_0000549101-mRNA-1
ACOC_0000550401	ACOC_0000550401-mRNA-1
ACOC_0000058201	ACOC_0000058201-mRNA-1
ACOC_0000552501	ACOC_0000552501-mRNA-1
ACOC_0000552601	ACOC_0000552601-mRNA-1
ACOC_0000552801	ACOC_0000552801-mRNA-1
ACOC_0000006501	ACOC_0000006501-mRNA-1
ACOC_0000058501	ACOC_0000058501-mRNA-1
ACOC_0000555201	ACOC_0000555201-mRNA-1
ACOC_0000556301	ACOC_0000556301-mRNA-1
ACOC_0000557501	ACOC_0000557501-mRNA-1
ACOC_0000557601	ACOC_0000557601-mRNA-1
ACOC_0000058701	ACOC_0000058701-mRNA-1
ACOC_0000557701	ACOC_0000557701-mRNA-1
ACOC_0000558201	ACOC_0000558201-mRNA-1
ACOC_0000560801	ACOC_0000560801-mRNA-1
ACOC_0000561701	ACOC_0000561701-mRNA-1
ACOC_0000563901	ACOC_0000563901-mRNA-1
ACOC_0000564501	ACOC_0000564501-mRNA-1
ACOC_0000564901	ACOC_0000564901-mRNA-1
ACOC_0000059601	ACOC_0000059601-mRNA-1
ACOC_0000565701	ACOC_0000565701-mRNA-1
ACOC_0000567501	ACOC_0000567501-mRNA-1
ACOC_0000567801	ACOC_0000567801-mRNA-1
ACOC_0000568001	ACOC_0000568001-mRNA-1
ACOC_0000568101	ACOC_0000568101-mRNA-1
ACOC_0000569301	ACOC_0000569301-mRNA-1
ACOC_0000569801	ACOC_0000569801-mRNA-1
ACOC_0000570501	ACOC_0000570501-mRNA-1
ACOC_0000060201	ACOC_0000060201-mRNA-1
ACOC_0000574701	ACOC_0000574701-mRNA-1
ACOC_0000575301	ACOC_0000575301-mRNA-1
ACOC_0000576501	ACOC_0000576501-mRNA-1
ACOC_0000060501	ACOC_0000060501-mRNA-1
ACOC_0000578101	ACOC_0000578101-mRNA-1
ACOC_0000578301	ACOC_0000578301-mRNA-1
ACOC_0000060801	ACOC_0000060801-mRNA-1
ACOC_0000580301	ACOC_0000580301-mRNA-1
ACOC_0000580401	ACOC_0000580401-mRNA-1
ACOC_0000580501	ACOC_0000580501-mRNA-1
ACOC_0000582001	ACOC_0000582001-mRNA-1
ACOC_0000583701	ACOC_0000583701-mRNA-1
ACOC_0000584301	ACOC_0000584301-mRNA-1
ACOC_0000007001	ACOC_0000007001-mRNA-1
ACOC_0000585701	ACOC_0000585701-mRNA-1
ACOC_0000586301	ACOC_0000586301-mRNA-1
ACOC_0000586901	ACOC_0000586901-mRNA-1
ACOC_0000587301	ACOC_0000587301-mRNA-1
ACOC_0000589701	ACOC_0000589701-mRNA-1
ACOC_0000590701	ACOC_0000590701-mRNA-1
ACOC_0000591301	ACOC_0000591301-mRNA-1
ACOC_0000592301	ACOC_0000592301-mRNA-1
ACOC_0000593301	ACOC_0000593301-mRNA-1
ACOC_0000595201	ACOC_0000595201-mRNA-1
ACOC_0000596301	ACOC_0000596301-mRNA-1
ACOC_0000596401	ACOC_0000596401-mRNA-1
ACOC_0000596501	ACOC_0000596501-mRNA-1
ACOC_0000598601	ACOC_0000598601-mRNA-1
ACOC_0000599201	ACOC_0000599201-mRNA-1
ACOC_0000599301	ACOC_0000599301-mRNA-1
ACOC_0000599801	ACOC_0000599801-mRNA-1
ACOC_0000600001	ACOC_0000600001-mRNA-1
ACOC_0000601201	ACOC_0000601201-mRNA-1
ACOC_0000601401	ACOC_0000601401-mRNA-1
ACOC_0000601601	ACOC_0000601601-mRNA-1
ACOC_0000601801	ACOC_0000601801-mRNA-1
ACOC_0000602401	ACOC_0000602401-mRNA-1
ACOC_0000602901	ACOC_0000602901-mRNA-1
ACOC_0000603001	ACOC_0000603001-mRNA-1
ACOC_0000603601	ACOC_0000603601-mRNA-1
ACOC_0000604001	ACOC_0000604001-mRNA-1
ACOC_0000063101	ACOC_0000063101-mRNA-1
ACOC_0000604601	ACOC_0000604601-mRNA-1
ACOC_0000604701	ACOC_0000604701-mRNA-1
ACOC_0000063201	ACOC_0000063201-mRNA-1
ACOC_0000605501	ACOC_0000605501-mRNA-1
ACOC_0000606101	ACOC_0000606101-mRNA-1
ACOC_0000607701	ACOC_0000607701-mRNA-1
ACOC_0000608901	ACOC_0000608901-mRNA-1
ACOC_0000611701	ACOC_0000611701-mRNA-1
ACOC_0000612001	ACOC_0000612001-mRNA-1
ACOC_0000612201	ACOC_0000612201-mRNA-1
ACOC_0000612801	ACOC_0000612801-mRNA-1
ACOC_0000614001	ACOC_0000614001-mRNA-1
ACOC_0000614901	ACOC_0000614901-mRNA-1
ACOC_0000617201	ACOC_0000617201-mRNA-1
ACOC_0000619501	ACOC_0000619501-mRNA-1
ACOC_0000064501	ACOC_0000064501-mRNA-1
ACOC_0000620701	ACOC_0000620701-mRNA-1
ACOC_0000621001	ACOC_0000621001-mRNA-1
ACOC_0000622001	ACOC_0000622001-mRNA-1
ACOC_0000622401	ACOC_0000622401-mRNA-1
ACOC_0000623601	ACOC_0000623601-mRNA-1
ACOC_0000624201	ACOC_0000624201-mRNA-1
ACOC_0000624701	ACOC_0000624701-mRNA-1
ACOC_0000625401	ACOC_0000625401-mRNA-1
ACOC_0000625501	ACOC_0000625501-mRNA-1
ACOC_0000625601	ACOC_0000625601-mRNA-1
ACOC_0000626201	ACOC_0000626201-mRNA-1
ACOC_0000628401	ACOC_0000628401-mRNA-1
ACOC_0000630001	ACOC_0000630001-mRNA-1
ACOC_0000065501	ACOC_0000065501-mRNA-1
ACOC_0000631501	ACOC_0000631501-mRNA-1
ACOC_0000632001	ACOC_0000632001-mRNA-1
ACOC_0000632801	ACOC_0000632801-mRNA-1
ACOC_0000632901	ACOC_0000632901-mRNA-1
ACOC_0000634101	ACOC_0000634101-mRNA-1
ACOC_0000007301	ACOC_0000007301-mRNA-1
ACOC_0000066101	ACOC_0000066101-mRNA-1
ACOC_0000637401	ACOC_0000637401-mRNA-1
ACOC_0000637501	ACOC_0000637501-mRNA-1
ACOC_0000638301	ACOC_0000638301-mRNA-1
ACOC_0000640901	ACOC_0000640901-mRNA-1
ACOC_0000641401	ACOC_0000641401-mRNA-1
ACOC_0000066601	ACOC_0000066601-mRNA-1
ACOC_0000643801	ACOC_0000643801-mRNA-1
ACOC_0000645001	ACOC_0000645001-mRNA-1
ACOC_0000645201	ACOC_0000645201-mRNA-1
ACOC_0000066901	ACOC_0000066901-mRNA-1
ACOC_0000646301	ACOC_0000646301-mRNA-1
ACOC_0000648301	ACOC_0000648301-mRNA-1
ACOC_0000067401	ACOC_0000067401-mRNA-1
ACOC_0000652001	ACOC_0000652001-mRNA-1
ACOC_0000654001	ACOC_0000654001-mRNA-1
ACOC_0000655901	ACOC_0000655901-mRNA-1
ACOC_0000657101	ACOC_0000657101-mRNA-1
ACOC_0000657501	ACOC_0000657501-mRNA-1
ACOC_0000657901	ACOC_0000657901-mRNA-1
ACOC_0000659601	ACOC_0000659601-mRNA-1
ACOC_0000661601	ACOC_0000661601-mRNA-1
ACOC_0000661701	ACOC_0000661701-mRNA-1
ACOC_0000662701	ACOC_0000662701-mRNA-1
ACOC_0000664101	ACOC_0000664101-mRNA-1
ACOC_0000665701	ACOC_0000665701-mRNA-1
ACOC_0000667001	ACOC_0000667001-mRNA-1
ACOC_0000667101	ACOC_0000667101-mRNA-1
ACOC_0000668901	ACOC_0000668901-mRNA-1
ACOC_0000669701	ACOC_0000669701-mRNA-1
ACOC_0000669801	ACOC_0000669801-mRNA-1
ACOC_0000670001	ACOC_0000670001-mRNA-1
ACOC_0000670501	ACOC_0000670501-mRNA-1
ACOC_0000672001	ACOC_0000672001-mRNA-1
ACOC_0000672401	ACOC_0000672401-mRNA-1
ACOC_0000672701	ACOC_0000672701-mRNA-1
ACOC_0000673101	ACOC_0000673101-mRNA-1
ACOC_0000674801	ACOC_0000674801-mRNA-1
ACOC_0000675601	ACOC_0000675601-mRNA-1
ACOC_0000676601	ACOC_0000676601-mRNA-1
ACOC_0000676901	ACOC_0000676901-mRNA-1
ACOC_0000678101	ACOC_0000678101-mRNA-1
ACOC_0000007701	ACOC_0000007701-mRNA-1
ACOC_0000679901	ACOC_0000679901-mRNA-1
ACOC_0000070201	ACOC_0000070201-mRNA-1
ACOC_0000681401	ACOC_0000681401-mRNA-1
ACOC_0000681601	ACOC_0000681601-mRNA-1
ACOC_0000682901	ACOC_0000682901-mRNA-1
ACOC_0000683001	ACOC_0000683001-mRNA-1
ACOC_0000683101	ACOC_0000683101-mRNA-1
ACOC_0000683301	ACOC_0000683301-mRNA-1
ACOC_0000684501	ACOC_0000684501-mRNA-1
ACOC_0000684601	ACOC_0000684601-mRNA-1
ACOC_0000687201	ACOC_0000687201-mRNA-1
ACOC_0000071101	ACOC_0000071101-mRNA-1
ACOC_0000689001	ACOC_0000689001-mRNA-1
ACOC_0000690101	ACOC_0000690101-mRNA-1
ACOC_0000690401	ACOC_0000690401-mRNA-1
ACOC_0000690901	ACOC_0000690901-mRNA-1
ACOC_0000693101	ACOC_0000693101-mRNA-1
ACOC_0000694401	ACOC_0000694401-mRNA-1
ACOC_0000694801	ACOC_0000694801-mRNA-1
ACOC_0000695101	ACOC_0000695101-mRNA-1
ACOC_0000695301	ACOC_0000695301-mRNA-1
ACOC_0000695501	ACOC_0000695501-mRNA-1
ACOC_0000696401	ACOC_0000696401-mRNA-1
ACOC_0000696501	ACOC_0000696501-mRNA-1
ACOC_0000697201	ACOC_0000697201-mRNA-1
ACOC_0000698301	ACOC_0000698301-mRNA-1
ACOC_0000698501	ACOC_0000698501-mRNA-1
ACOC_0000699601	ACOC_0000699601-mRNA-1
ACOC_0000699701	ACOC_0000699701-mRNA-1
ACOC_0000699801	ACOC_0000699801-mRNA-1
ACOC_0000701001	ACOC_0000701001-mRNA-1
ACOC_0000701401	ACOC_0000701401-mRNA-1
ACOC_0000702501	ACOC_0000702501-mRNA-1
ACOC_0000702801	ACOC_0000702801-mRNA-1
ACOC_0000703101	ACOC_0000703101-mRNA-1
ACOC_0000703601	ACOC_0000703601-mRNA-1
ACOC_0000704101	ACOC_0000704101-mRNA-1
ACOC_0000704401	ACOC_0000704401-mRNA-1
ACOC_0000704601	ACOC_0000704601-mRNA-1
ACOC_0000704701	ACOC_0000704701-mRNA-1
ACOC_0000706901	ACOC_0000706901-mRNA-1
ACOC_0000707501	ACOC_0000707501-mRNA-1
ACOC_0000708601	ACOC_0000708601-mRNA-1
ACOC_0000709201	ACOC_0000709201-mRNA-1
ACOC_0000709801	ACOC_0000709801-mRNA-1
ACOC_0000710401	ACOC_0000710401-mRNA-1
ACOC_0000710601	ACOC_0000710601-mRNA-1
ACOC_0000711201	ACOC_0000711201-mRNA-1
ACOC_0000712301	ACOC_0000712301-mRNA-1
ACOC_0000714101	ACOC_0000714101-mRNA-1
ACOC_0000715401	ACOC_0000715401-mRNA-1
ACOC_0000715601	ACOC_0000715601-mRNA-1
ACOC_0000715801	ACOC_0000715801-mRNA-1
ACOC_0000715901	ACOC_0000715901-mRNA-1
ACOC_0000716801	ACOC_0000716801-mRNA-1
ACOC_0000717401	ACOC_0000717401-mRNA-1
ACOC_0000717501	ACOC_0000717501-mRNA-1
ACOC_0000074001	ACOC_0000074001-mRNA-1
ACOC_0000718201	ACOC_0000718201-mRNA-1
ACOC_0000719001	ACOC_0000719001-mRNA-1
ACOC_0000721601	ACOC_0000721601-mRNA-1
ACOC_0000074601	ACOC_0000074601-mRNA-1
ACOC_0000725301	ACOC_0000725301-mRNA-1
ACOC_0000726501	ACOC_0000726501-mRNA-1
ACOC_0000075001	ACOC_0000075001-mRNA-1
ACOC_0000728101	ACOC_0000728101-mRNA-1
ACOC_0000728701	ACOC_0000728701-mRNA-1
ACOC_0000731501	ACOC_0000731501-mRNA-1
ACOC_0000732201	ACOC_0000732201-mRNA-1
ACOC_0000733401	ACOC_0000733401-mRNA-1
ACOC_0000733801	ACOC_0000733801-mRNA-1
ACOC_0000734201	ACOC_0000734201-mRNA-1
ACOC_0000734701	ACOC_0000734701-mRNA-1
ACOC_0000735401	ACOC_0000735401-mRNA-1
ACOC_0000735901	ACOC_0000735901-mRNA-1
ACOC_0000736501	ACOC_0000736501-mRNA-1
ACOC_0000076201	ACOC_0000076201-mRNA-1
ACOC_0000738601	ACOC_0000738601-mRNA-1
ACOC_0000076701	ACOC_0000076701-mRNA-1
ACOC_0000742601	ACOC_0000742601-mRNA-1
ACOC_0000744101	ACOC_0000744101-mRNA-1
ACOC_0000746601	ACOC_0000746601-mRNA-1
ACOC_0000077501	ACOC_0000077501-mRNA-1
ACOC_0000747401	ACOC_0000747401-mRNA-1
ACOC_0000751401	ACOC_0000751401-mRNA-1
ACOC_0000752201	ACOC_0000752201-mRNA-1
ACOC_0000752401	ACOC_0000752401-mRNA-1
ACOC_0000753901	ACOC_0000753901-mRNA-1
ACOC_0000754001	ACOC_0000754001-mRNA-1
ACOC_0000755001	ACOC_0000755001-mRNA-1
ACOC_0000078701	ACOC_0000078701-mRNA-1
ACOC_0000758001	ACOC_0000758001-mRNA-1
ACOC_0000759501	ACOC_0000759501-mRNA-1
ACOC_0000759601	ACOC_0000759601-mRNA-1
ACOC_0000760601	ACOC_0000760601-mRNA-1
ACOC_0000760701	ACOC_0000760701-mRNA-1
ACOC_0000760901	ACOC_0000760901-mRNA-1
ACOC_0000761001	ACOC_0000761001-mRNA-1
ACOC_0000761101	ACOC_0000761101-mRNA-1
ACOC_0000761301	ACOC_0000761301-mRNA-1
ACOC_0000079401	ACOC_0000079401-mRNA-1
ACOC_0000764101	ACOC_0000764101-mRNA-1
ACOC_0000079501	ACOC_0000079501-mRNA-1
ACOC_0000765301	ACOC_0000765301-mRNA-1
ACOC_0000766001	ACOC_0000766001-mRNA-1
ACOC_0000766801	ACOC_0000766801-mRNA-1
ACOC_0000768401	ACOC_0000768401-mRNA-1
ACOC_0000768901	ACOC_0000768901-mRNA-1
ACOC_0000770301	ACOC_0000770301-mRNA-1
ACOC_0000008801	ACOC_0000008801-mRNA-1
ACOC_0000771101	ACOC_0000771101-mRNA-1
ACOC_0000772101	ACOC_0000772101-mRNA-1
ACOC_0000773001	ACOC_0000773001-mRNA-1
ACOC_0000080201	ACOC_0000080201-mRNA-1
ACOC_0000773301	ACOC_0000773301-mRNA-1
ACOC_0000776201	ACOC_0000776201-mRNA-1
ACOC_0000777401	ACOC_0000777401-mRNA-1
ACOC_0000778001	ACOC_0000778001-mRNA-1
ACOC_0000781501	ACOC_0000781501-mRNA-1
ACOC_0000781601	ACOC_0000781601-mRNA-1
ACOC_0000783001	ACOC_0000783001-mRNA-1
ACOC_0000784001	ACOC_0000784001-mRNA-1
ACOC_0000081901	ACOC_0000081901-mRNA-1
ACOC_0000785501	ACOC_0000785501-mRNA-1
ACOC_0000785601	ACOC_0000785601-mRNA-1
ACOC_0000785701	ACOC_0000785701-mRNA-1
ACOC_0000787601	ACOC_0000787601-mRNA-1
ACOC_0000082301	ACOC_0000082301-mRNA-1
ACOC_0000788701	ACOC_0000788701-mRNA-1
ACOC_0000790301	ACOC_0000790301-mRNA-1
ACOC_0000082601	ACOC_0000082601-mRNA-1
ACOC_0000791501	ACOC_0000791501-mRNA-1
ACOC_0000791601	ACOC_0000791601-mRNA-1
ACOC_0000082901	ACOC_0000082901-mRNA-1
ACOC_0000792701	ACOC_0000792701-mRNA-1
ACOC_0000792901	ACOC_0000792901-mRNA-1
ACOC_0000793601	ACOC_0000793601-mRNA-1
ACOC_0000794101	ACOC_0000794101-mRNA-1
ACOC_0000794201	ACOC_0000794201-mRNA-1
ACOC_0000796001	ACOC_0000796001-mRNA-1
ACOC_0000796501	ACOC_0000796501-mRNA-1
ACOC_0000796701	ACOC_0000796701-mRNA-1
ACOC_0000084101	ACOC_0000084101-mRNA-1
ACOC_0000799801	ACOC_0000799801-mRNA-1
ACOC_0000799901	ACOC_0000799901-mRNA-1
ACOC_0000800301	ACOC_0000800301-mRNA-1
ACOC_0000802801	ACOC_0000802801-mRNA-1
ACOC_0000809501	ACOC_0000809501-mRNA-1
ACOC_0000810301	ACOC_0000810301-mRNA-1
ACOC_0000811201	ACOC_0000811201-mRNA-1
ACOC_0000814701	ACOC_0000814701-mRNA-1
ACOC_0000815001	ACOC_0000815001-mRNA-1
ACOC_0000815301	ACOC_0000815301-mRNA-1
ACOC_0000085601	ACOC_0000085601-mRNA-1
ACOC_0000816001	ACOC_0000816001-mRNA-1
ACOC_0000817601	ACOC_0000817601-mRNA-1
ACOC_0000818601	ACOC_0000818601-mRNA-1
ACOC_0000819101	ACOC_0000819101-mRNA-1
ACOC_0000819501	ACOC_0000819501-mRNA-1
ACOC_0000085901	ACOC_0000085901-mRNA-1
ACOC_0000819701	ACOC_0000819701-mRNA-1
ACOC_0000820301	ACOC_0000820301-mRNA-1
ACOC_0000822001	ACOC_0000822001-mRNA-1
ACOC_0000822401	ACOC_0000822401-mRNA-1
ACOC_0000823001	ACOC_0000823001-mRNA-1
ACOC_0000825401	ACOC_0000825401-mRNA-1
ACOC_0000825701	ACOC_0000825701-mRNA-1
ACOC_0000830601	ACOC_0000830601-mRNA-1
ACOC_0000830901	ACOC_0000830901-mRNA-1
ACOC_0000831401	ACOC_0000831401-mRNA-1
ACOC_0000831801	ACOC_0000831801-mRNA-1
ACOC_0000832501	ACOC_0000832501-mRNA-1
ACOC_0000833201	ACOC_0000833201-mRNA-1
ACOC_0000834501	ACOC_0000834501-mRNA-1
ACOC_0000835201	ACOC_0000835201-mRNA-1
ACOC_0000836401	ACOC_0000836401-mRNA-1
ACOC_0000837401	ACOC_0000837401-mRNA-1
ACOC_0000837601	ACOC_0000837601-mRNA-1
ACOC_0000838901	ACOC_0000838901-mRNA-1
ACOC_0000839401	ACOC_0000839401-mRNA-1
ACOC_0000839601	ACOC_0000839601-mRNA-1
ACOC_0000839701	ACOC_0000839701-mRNA-1
ACOC_0000840401	ACOC_0000840401-mRNA-1
ACOC_0000088001	ACOC_0000088001-mRNA-1
ACOC_0000841601	ACOC_0000841601-mRNA-1
ACOC_0000842901	ACOC_0000842901-mRNA-1
ACOC_0000843001	ACOC_0000843001-mRNA-1
ACOC_0000845101	ACOC_0000845101-mRNA-1
ACOC_0000846001	ACOC_0000846001-mRNA-1
ACOC_0000088601	ACOC_0000088601-mRNA-1
ACOC_0000848801	ACOC_0000848801-mRNA-1
ACOC_0000851101	ACOC_0000851101-mRNA-1
ACOC_0000851201	ACOC_0000851201-mRNA-1
ACOC_0000852301	ACOC_0000852301-mRNA-1
ACOC_0000853501	ACOC_0000853501-mRNA-1
ACOC_0000854001	ACOC_0000854001-mRNA-1
ACOC_0000855701	ACOC_0000855701-mRNA-1
ACOC_0000855901	ACOC_0000855901-mRNA-1
ACOC_0000856901	ACOC_0000856901-mRNA-1
ACOC_0000857201	ACOC_0000857201-mRNA-1
ACOC_0000858101	ACOC_0000858101-mRNA-1
ACOC_0000858501	ACOC_0000858501-mRNA-1
ACOC_0000859701	ACOC_0000859701-mRNA-1
ACOC_0000861201	ACOC_0000861201-mRNA-1
ACOC_0000861701	ACOC_0000861701-mRNA-1
ACOC_0000862301	ACOC_0000862301-mRNA-1
ACOC_0000862601	ACOC_0000862601-mRNA-1
ACOC_0000865901	ACOC_0000865901-mRNA-1
ACOC_0000866501	ACOC_0000866501-mRNA-1
ACOC_0000090101	ACOC_0000090101-mRNA-1
ACOC_0000868001	ACOC_0000868001-mRNA-1
ACOC_0000090201	ACOC_0000090201-mRNA-1
ACOC_0000868701	ACOC_0000868701-mRNA-1
ACOC_0000868801	ACOC_0000868801-mRNA-1
ACOC_0000870101	ACOC_0000870101-mRNA-1
ACOC_0000870301	ACOC_0000870301-mRNA-1
ACOC_0000870601	ACOC_0000870601-mRNA-1
ACOC_0000871201	ACOC_0000871201-mRNA-1
ACOC_0000871301	ACOC_0000871301-mRNA-1
ACOC_0000871401	ACOC_0000871401-mRNA-1
ACOC_0000871801	ACOC_0000871801-mRNA-1
ACOC_0000872701	ACOC_0000872701-mRNA-1
ACOC_0000873801	ACOC_0000873801-mRNA-1
ACOC_0000875201	ACOC_0000875201-mRNA-1
ACOC_0000876001	ACOC_0000876001-mRNA-1
ACOC_0000877201	ACOC_0000877201-mRNA-1
ACOC_0000877401	ACOC_0000877401-mRNA-1
ACOC_0000877601	ACOC_0000877601-mRNA-1
ACOC_0000878801	ACOC_0000878801-mRNA-1
ACOC_0000879901	ACOC_0000879901-mRNA-1
ACOC_0000880001	ACOC_0000880001-mRNA-1
ACOC_0000880201	ACOC_0000880201-mRNA-1
ACOC_0000880301	ACOC_0000880301-mRNA-1
ACOC_0000880701	ACOC_0000880701-mRNA-1
ACOC_0000882801	ACOC_0000882801-mRNA-1
ACOC_0000883201	ACOC_0000883201-mRNA-1
ACOC_0000883901	ACOC_0000883901-mRNA-1
ACOC_0000884001	ACOC_0000884001-mRNA-1
ACOC_0000884601	ACOC_0000884601-mRNA-1
ACOC_0000091701	ACOC_0000091701-mRNA-1
ACOC_0000886001	ACOC_0000886001-mRNA-1
ACOC_0000886201	ACOC_0000886201-mRNA-1
ACOC_0000886401	ACOC_0000886401-mRNA-1
ACOC_0000888701	ACOC_0000888701-mRNA-1
ACOC_0000888801	ACOC_0000888801-mRNA-1
ACOC_0000888901	ACOC_0000888901-mRNA-1
ACOC_0000889001	ACOC_0000889001-mRNA-1
ACOC_0000889101	ACOC_0000889101-mRNA-1
ACOC_0000890001	ACOC_0000890001-mRNA-1
ACOC_0000890701	ACOC_0000890701-mRNA-1
ACOC_0000092801	ACOC_0000092801-mRNA-1
ACOC_0000895401	ACOC_0000895401-mRNA-1
ACOC_0000896301	ACOC_0000896301-mRNA-1
ACOC_0000896801	ACOC_0000896801-mRNA-1
ACOC_0000010201	ACOC_0000010201-mRNA-1
ACOC_0000898101	ACOC_0000898101-mRNA-1
ACOC_0000898401	ACOC_0000898401-mRNA-1
ACOC_0000093301	ACOC_0000093301-mRNA-1
ACOC_0000902301	ACOC_0000902301-mRNA-1
ACOC_0000902801	ACOC_0000902801-mRNA-1
ACOC_0000093701	ACOC_0000093701-mRNA-1
ACOC_0000904201	ACOC_0000904201-mRNA-1
ACOC_0000904401	ACOC_0000904401-mRNA-1
ACOC_0000904601	ACOC_0000904601-mRNA-1
ACOC_0000905001	ACOC_0000905001-mRNA-1
ACOC_0000905801	ACOC_0000905801-mRNA-1
ACOC_0000907201	ACOC_0000907201-mRNA-1
ACOC_0000907601	ACOC_0000907601-mRNA-1
ACOC_0000907801	ACOC_0000907801-mRNA-1
ACOC_0000094301	ACOC_0000094301-mRNA-1
ACOC_0000909701	ACOC_0000909701-mRNA-1
ACOC_0000094501	ACOC_0000094501-mRNA-1
ACOC_0000911901	ACOC_0000911901-mRNA-1
ACOC_0000912601	ACOC_0000912601-mRNA-1
ACOC_0000912701	ACOC_0000912701-mRNA-1
ACOC_0000913301	ACOC_0000913301-mRNA-1
ACOC_0000914101	ACOC_0000914101-mRNA-1
ACOC_0000914401	ACOC_0000914401-mRNA-1
ACOC_0000914701	ACOC_0000914701-mRNA-1
ACOC_0000918001	ACOC_0000918001-mRNA-1
ACOC_0000919201	ACOC_0000919201-mRNA-1
ACOC_0000919901	ACOC_0000919901-mRNA-1
ACOC_0000920701	ACOC_0000920701-mRNA-1
ACOC_0000921401	ACOC_0000921401-mRNA-1
ACOC_0000922601	ACOC_0000922601-mRNA-1
ACOC_0000922801	ACOC_0000922801-mRNA-1
ACOC_0000923301	ACOC_0000923301-mRNA-1
ACOC_0000923801	ACOC_0000923801-mRNA-1
ACOC_0000923901	ACOC_0000923901-mRNA-1
ACOC_0000925001	ACOC_0000925001-mRNA-1
ACOC_0000095801	ACOC_0000095801-mRNA-1
ACOC_0000926901	ACOC_0000926901-mRNA-1
ACOC_0000927201	ACOC_0000927201-mRNA-1
ACOC_0000927501	ACOC_0000927501-mRNA-1
ACOC_0000927701	ACOC_0000927701-mRNA-1
ACOC_0000927901	ACOC_0000927901-mRNA-1
ACOC_0000930101	ACOC_0000930101-mRNA-1
ACOC_0000930601	ACOC_0000930601-mRNA-1
ACOC_0000930901	ACOC_0000930901-mRNA-1
ACOC_0000931101	ACOC_0000931101-mRNA-1
ACOC_0000932201	ACOC_0000932201-mRNA-1
ACOC_0000933201	ACOC_0000933201-mRNA-1
ACOC_0000933301	ACOC_0000933301-mRNA-1
ACOC_0000935001	ACOC_0000935001-mRNA-1
ACOC_0000938501	ACOC_0000938501-mRNA-1
ACOC_0000943701	ACOC_0000943701-mRNA-1
ACOC_0000944601	ACOC_0000944601-mRNA-1
ACOC_0000945201	ACOC_0000945201-mRNA-1
ACOC_0000946201	ACOC_0000946201-mRNA-1
ACOC_0000098101	ACOC_0000098101-mRNA-1
ACOC_0000949401	ACOC_0000949401-mRNA-1
ACOC_0000950401	ACOC_0000950401-mRNA-1
ACOC_0000010901	ACOC_0000010901-mRNA-1
ACOC_0000951301	ACOC_0000951301-mRNA-1
ACOC_0000951401	ACOC_0000951401-mRNA-1
ACOC_0000951701	ACOC_0000951701-mRNA-1
ACOC_0000953301	ACOC_0000953301-mRNA-1
ACOC_0000099201	ACOC_0000099201-mRNA-1
ACOC_0000958601	ACOC_0000958601-mRNA-1
ACOC_0000959301	ACOC_0000959301-mRNA-1
ACOC_0000959501	ACOC_0000959501-mRNA-1
ACOC_0000961201	ACOC_0000961201-mRNA-1
ACOC_0000961301	ACOC_0000961301-mRNA-1
ACOC_0000962301	ACOC_0000962301-mRNA-1
ACOC_0000963001	ACOC_0000963001-mRNA-1
ACOC_0000964601	ACOC_0000964601-mRNA-1
ACOC_0000964701	ACOC_0000964701-mRNA-1
ACOC_0000964901	ACOC_0000964901-mRNA-1
ACOC_0000099801	ACOC_0000099801-mRNA-1
ACOC_0000965501	ACOC_0000965501-mRNA-1
ACOC_0000965801	ACOC_0000965801-mRNA-1
ACOC_0000099901	ACOC_0000099901-mRNA-1
ACOC_0000967401	ACOC_0000967401-mRNA-1
ACOC_0000967601	ACOC_0000967601-mRNA-1
ACOC_0000968201	ACOC_0000968201-mRNA-1
ACOC_0000969101	ACOC_0000969101-mRNA-1
ACOC_0000970001	ACOC_0000970001-mRNA-1
ACOC_0000970301	ACOC_0000970301-mRNA-1
ACOC_0000970801	ACOC_0000970801-mRNA-1
ACOC_0000971001	ACOC_0000971001-mRNA-1
ACOC_0000972001	ACOC_0000972001-mRNA-1
ACOC_0000975501	ACOC_0000975501-mRNA-1
ACOC_0000976901	ACOC_0000976901-mRNA-1
ACOC_0000978901	ACOC_0000978901-mRNA-1
ACOC_0000101401	ACOC_0000101401-mRNA-1
ACOC_0000979701	ACOC_0000979701-mRNA-1
ACOC_0000980101	ACOC_0000980101-mRNA-1
ACOC_0000981501	ACOC_0000981501-mRNA-1
ACOC_0000101601	ACOC_0000101601-mRNA-1
ACOC_0000983501	ACOC_0000983501-mRNA-1
ACOC_0000983901	ACOC_0000983901-mRNA-1
ACOC_0000984101	ACOC_0000984101-mRNA-1
ACOC_0000985501	ACOC_0000985501-mRNA-1
ACOC_0000985701	ACOC_0000985701-mRNA-1
ACOC_0000986101	ACOC_0000986101-mRNA-1
ACOC_0000986301	ACOC_0000986301-mRNA-1
ACOC_0000986401	ACOC_0000986401-mRNA-1
ACOC_0000988301	ACOC_0000988301-mRNA-1
ACOC_0000989101	ACOC_0000989101-mRNA-1
ACOC_0000989501	ACOC_0000989501-mRNA-1
ACOC_0000989701	ACOC_0000989701-mRNA-1
ACOC_0000990201	ACOC_0000990201-mRNA-1
ACOC_0000991801	ACOC_0000991801-mRNA-1
ACOC_0000992501	ACOC_0000992501-mRNA-1
ACOC_0000103301	ACOC_0000103301-mRNA-1
ACOC_0000996301	ACOC_0000996301-mRNA-1
ACOC_0000103401	ACOC_0000103401-mRNA-1
ACOC_0000997101	ACOC_0000997101-mRNA-1
ACOC_0000998001	ACOC_0000998001-mRNA-1
ACOC_0000998301	ACOC_0000998301-mRNA-1
ACOC_0001001201	ACOC_0001001201-mRNA-1
ACOC_0001001801	ACOC_0001001801-mRNA-1
ACOC_0001004401	ACOC_0001004401-mRNA-1
ACOC_0000104301	ACOC_0000104301-mRNA-1
ACOC_0001006001	ACOC_0001006001-mRNA-1
ACOC_0001006101	ACOC_0001006101-mRNA-1
ACOC_0001006801	ACOC_0001006801-mRNA-1
ACOC_0001007401	ACOC_0001007401-mRNA-1
ACOC_0001007801	ACOC_0001007801-mRNA-1
ACOC_0001008101	ACOC_0001008101-mRNA-1
ACOC_0001009701	ACOC_0001009701-mRNA-1
ACOC_0001011201	ACOC_0001011201-mRNA-1
ACOC_0001012901	ACOC_0001012901-mRNA-1
ACOC_0001014201	ACOC_0001014201-mRNA-1
ACOC_0001014401	ACOC_0001014401-mRNA-1
ACOC_0001014601	ACOC_0001014601-mRNA-1
ACOC_0001015801	ACOC_0001015801-mRNA-1
ACOC_0001018101	ACOC_0001018101-mRNA-1
ACOC_0001018901	ACOC_0001018901-mRNA-1
ACOC_0001019701	ACOC_0001019701-mRNA-1
ACOC_0001020301	ACOC_0001020301-mRNA-1
ACOC_0001020801	ACOC_0001020801-mRNA-1
ACOC_0001022201	ACOC_0001022201-mRNA-1
ACOC_0000000801	ACOC_0000000801-mRNA-1
ACOC_0000002101	ACOC_0000002101-mRNA-1
ACOC_0000002901	ACOC_0000002901-mRNA-1
ACOC_0000003101	ACOC_0000003101-mRNA-1
ACOC_0000003401	ACOC_0000003401-mRNA-1
ACOC_0000005001	ACOC_0000005001-mRNA-1
ACOC_0000005201	ACOC_0000005201-mRNA-1
ACOC_0000005301	ACOC_0000005301-mRNA-1
ACOC_0000006601	ACOC_0000006601-mRNA-1
ACOC_0000006901	ACOC_0000006901-mRNA-1
ACOC_0000009301	ACOC_0000009301-mRNA-1
ACOC_0000010001	ACOC_0000010001-mRNA-1
ACOC_0000010101	ACOC_0000010101-mRNA-1
ACOC_0000011501	ACOC_0000011501-mRNA-1
ACOC_0000011801	ACOC_0000011801-mRNA-1
ACOC_0000012001	ACOC_0000012001-mRNA-1
ACOC_0000014801	ACOC_0000014801-mRNA-1
ACOC_0000016301	ACOC_0000016301-mRNA-1
ACOC_0000019101	ACOC_0000019101-mRNA-1
ACOC_0000019801	ACOC_0000019801-mRNA-1
ACOC_0000021901	ACOC_0000021901-mRNA-1
ACOC_0000024101	ACOC_0000024101-mRNA-1
ACOC_0000026401	ACOC_0000026401-mRNA-1
ACOC_0000027301	ACOC_0000027301-mRNA-1
ACOC_0000029501	ACOC_0000029501-mRNA-1
ACOC_0000034001	ACOC_0000034001-mRNA-1
ACOC_0000036901	ACOC_0000036901-mRNA-1
ACOC_0000039201	ACOC_0000039201-mRNA-1
ACOC_0000039301	ACOC_0000039301-mRNA-1
ACOC_0000039601	ACOC_0000039601-mRNA-1
ACOC_0000040201	ACOC_0000040201-mRNA-1
ACOC_0000040401	ACOC_0000040401-mRNA-1
ACOC_0000040501	ACOC_0000040501-mRNA-1
ACOC_0000041201	ACOC_0000041201-mRNA-1
ACOC_0000042301	ACOC_0000042301-mRNA-1
ACOC_0000042701	ACOC_0000042701-mRNA-1
ACOC_0000042901	ACOC_0000042901-mRNA-1
ACOC_0000043001	ACOC_0000043001-mRNA-1
ACOC_0000044801	ACOC_0000044801-mRNA-1
ACOC_0000045601	ACOC_0000045601-mRNA-1
ACOC_0000047001	ACOC_0000047001-mRNA-1
ACOC_0000048301	ACOC_0000048301-mRNA-1
ACOC_0000048601	ACOC_0000048601-mRNA-1
ACOC_0000049101	ACOC_0000049101-mRNA-1
ACOC_0000049901	ACOC_0000049901-mRNA-1
ACOC_0000053201	ACOC_0000053201-mRNA-1
ACOC_0000055001	ACOC_0000055001-mRNA-1
ACOC_0000055101	ACOC_0000055101-mRNA-1
ACOC_0000056801	ACOC_0000056801-mRNA-1
ACOC_0000058301	ACOC_0000058301-mRNA-1
ACOC_0000061001	ACOC_0000061001-mRNA-1
ACOC_0000063501	ACOC_0000063501-mRNA-1
ACOC_0000064001	ACOC_0000064001-mRNA-1
ACOC_0000064101	ACOC_0000064101-mRNA-1
ACOC_0000065001	ACOC_0000065001-mRNA-1
ACOC_0000065401	ACOC_0000065401-mRNA-1
ACOC_0000065601	ACOC_0000065601-mRNA-1
ACOC_0000065701	ACOC_0000065701-mRNA-1
ACOC_0000069201	ACOC_0000069201-mRNA-1
ACOC_0000070101	ACOC_0000070101-mRNA-1
ACOC_0000072001	ACOC_0000072001-mRNA-1
ACOC_0000072101	ACOC_0000072101-mRNA-1
ACOC_0000073401	ACOC_0000073401-mRNA-1
ACOC_0000074301	ACOC_0000074301-mRNA-1
ACOC_0000075101	ACOC_0000075101-mRNA-1
ACOC_0000075201	ACOC_0000075201-mRNA-1
ACOC_0000076301	ACOC_0000076301-mRNA-1
ACOC_0000076401	ACOC_0000076401-mRNA-1
ACOC_0000077601	ACOC_0000077601-mRNA-1
ACOC_0000078001	ACOC_0000078001-mRNA-1
ACOC_0000080301	ACOC_0000080301-mRNA-1
ACOC_0000083301	ACOC_0000083301-mRNA-1
ACOC_0000084601	ACOC_0000084601-mRNA-1
ACOC_0000086501	ACOC_0000086501-mRNA-1
ACOC_0000086801	ACOC_0000086801-mRNA-1
ACOC_0000087501	ACOC_0000087501-mRNA-1
ACOC_0000088201	ACOC_0000088201-mRNA-1
ACOC_0000089801	ACOC_0000089801-mRNA-1
ACOC_0000091801	ACOC_0000091801-mRNA-1
ACOC_0000092501	ACOC_0000092501-mRNA-1
ACOC_0000092901	ACOC_0000092901-mRNA-1
ACOC_0000094001	ACOC_0000094001-mRNA-1
ACOC_0000095401	ACOC_0000095401-mRNA-1
ACOC_0000096801	ACOC_0000096801-mRNA-1
ACOC_0000100201	ACOC_0000100201-mRNA-1
ACOC_0000100901	ACOC_0000100901-mRNA-1
ACOC_0000103101	ACOC_0000103101-mRNA-1
ACOC_0000106201	ACOC_0000106201-mRNA-1
ACOC_0000108301	ACOC_0000108301-mRNA-1
ACOC_0000108401	ACOC_0000108401-mRNA-1
ACOC_0000108801	ACOC_0000108801-mRNA-1
ACOC_0000111401	ACOC_0000111401-mRNA-1
ACOC_0000112601	ACOC_0000112601-mRNA-1
ACOC_0000113101	ACOC_0000113101-mRNA-1
ACOC_0000114501	ACOC_0000114501-mRNA-1
ACOC_0000115201	ACOC_0000115201-mRNA-1
ACOC_0000115401	ACOC_0000115401-mRNA-1
ACOC_0000116801	ACOC_0000116801-mRNA-1
ACOC_0000116901	ACOC_0000116901-mRNA-1
ACOC_0000121401	ACOC_0000121401-mRNA-1
ACOC_0000122101	ACOC_0000122101-mRNA-1
ACOC_0000126401	ACOC_0000126401-mRNA-1
ACOC_0000129701	ACOC_0000129701-mRNA-1
ACOC_0000130501	ACOC_0000130501-mRNA-1
ACOC_0000131301	ACOC_0000131301-mRNA-1
ACOC_0000134001	ACOC_0000134001-mRNA-1
ACOC_0000134301	ACOC_0000134301-mRNA-1
ACOC_0000134501	ACOC_0000134501-mRNA-1
ACOC_0000137101	ACOC_0000137101-mRNA-1
ACOC_0000137701	ACOC_0000137701-mRNA-1
ACOC_0000138101	ACOC_0000138101-mRNA-1
ACOC_0000138201	ACOC_0000138201-mRNA-1
ACOC_0000138301	ACOC_0000138301-mRNA-1
ACOC_0000138401	ACOC_0000138401-mRNA-1
ACOC_0000144801	ACOC_0000144801-mRNA-1
ACOC_0000148001	ACOC_0000148001-mRNA-1
ACOC_0000149101	ACOC_0000149101-mRNA-1
ACOC_0000149201	ACOC_0000149201-mRNA-1
ACOC_0000149301	ACOC_0000149301-mRNA-1
ACOC_0000149401	ACOC_0000149401-mRNA-1
ACOC_0000150201	ACOC_0000150201-mRNA-1
ACOC_0000150501	ACOC_0000150501-mRNA-1
ACOC_0000150801	ACOC_0000150801-mRNA-1
ACOC_0000151201	ACOC_0000151201-mRNA-1
ACOC_0000151801	ACOC_0000151801-mRNA-1
ACOC_0000154101	ACOC_0000154101-mRNA-1
ACOC_0000155201	ACOC_0000155201-mRNA-1
ACOC_0000155701	ACOC_0000155701-mRNA-1
ACOC_0000156001	ACOC_0000156001-mRNA-1
ACOC_0000156801	ACOC_0000156801-mRNA-1
ACOC_0000157401	ACOC_0000157401-mRNA-1
ACOC_0000157501	ACOC_0000157501-mRNA-1
ACOC_0000158901	ACOC_0000158901-mRNA-1
ACOC_0000161301	ACOC_0000161301-mRNA-1
ACOC_0000161901	ACOC_0000161901-mRNA-1
ACOC_0000162401	ACOC_0000162401-mRNA-1
ACOC_0000162901	ACOC_0000162901-mRNA-1
ACOC_0000163801	ACOC_0000163801-mRNA-1
ACOC_0000164101	ACOC_0000164101-mRNA-1
ACOC_0000164501	ACOC_0000164501-mRNA-1
ACOC_0000165701	ACOC_0000165701-mRNA-1
ACOC_0000168901	ACOC_0000168901-mRNA-1
ACOC_0000170101	ACOC_0000170101-mRNA-1
ACOC_0000170201	ACOC_0000170201-mRNA-1
ACOC_0000170301	ACOC_0000170301-mRNA-1
ACOC_0000172001	ACOC_0000172001-mRNA-1
ACOC_0000174801	ACOC_0000174801-mRNA-1
ACOC_0000175201	ACOC_0000175201-mRNA-1
ACOC_0000175701	ACOC_0000175701-mRNA-1
ACOC_0000175901	ACOC_0000175901-mRNA-1
ACOC_0000177701	ACOC_0000177701-mRNA-1
ACOC_0000178101	ACOC_0000178101-mRNA-1
ACOC_0000179101	ACOC_0000179101-mRNA-1
ACOC_0000179401	ACOC_0000179401-mRNA-1
ACOC_0000180301	ACOC_0000180301-mRNA-1
ACOC_0000180501	ACOC_0000180501-mRNA-1
ACOC_0000180901	ACOC_0000180901-mRNA-1
ACOC_0000183801	ACOC_0000183801-mRNA-1
ACOC_0000184001	ACOC_0000184001-mRNA-1
ACOC_0000184201	ACOC_0000184201-mRNA-1
ACOC_0000187101	ACOC_0000187101-mRNA-1
ACOC_0000188301	ACOC_0000188301-mRNA-1
ACOC_0000189401	ACOC_0000189401-mRNA-1
ACOC_0000189501	ACOC_0000189501-mRNA-1
ACOC_0000192301	ACOC_0000192301-mRNA-1
ACOC_0000192701	ACOC_0000192701-mRNA-1
ACOC_0000195001	ACOC_0000195001-mRNA-1
ACOC_0000195401	ACOC_0000195401-mRNA-1
ACOC_0000197301	ACOC_0000197301-mRNA-1
ACOC_0000197701	ACOC_0000197701-mRNA-1
ACOC_0000198201	ACOC_0000198201-mRNA-1
ACOC_0000199501	ACOC_0000199501-mRNA-1
ACOC_0000199601	ACOC_0000199601-mRNA-1
ACOC_0000200601	ACOC_0000200601-mRNA-1
ACOC_0000200801	ACOC_0000200801-mRNA-1
ACOC_0000204501	ACOC_0000204501-mRNA-1
ACOC_0000205901	ACOC_0000205901-mRNA-1
ACOC_0000206001	ACOC_0000206001-mRNA-1
ACOC_0000206101	ACOC_0000206101-mRNA-1
ACOC_0000209001	ACOC_0000209001-mRNA-1
ACOC_0000209101	ACOC_0000209101-mRNA-1
ACOC_0000211301	ACOC_0000211301-mRNA-1
ACOC_0000211401	ACOC_0000211401-mRNA-1
ACOC_0000214701	ACOC_0000214701-mRNA-1
ACOC_0000214901	ACOC_0000214901-mRNA-1
ACOC_0000215001	ACOC_0000215001-mRNA-1
ACOC_0000216301	ACOC_0000216301-mRNA-1
ACOC_0000218801	ACOC_0000218801-mRNA-1
ACOC_0000219201	ACOC_0000219201-mRNA-1
ACOC_0000219801	ACOC_0000219801-mRNA-1
ACOC_0000220401	ACOC_0000220401-mRNA-1
ACOC_0000221101	ACOC_0000221101-mRNA-1
ACOC_0000221201	ACOC_0000221201-mRNA-1
ACOC_0000221301	ACOC_0000221301-mRNA-1
ACOC_0000223301	ACOC_0000223301-mRNA-1
ACOC_0000223401	ACOC_0000223401-mRNA-1
ACOC_0000225801	ACOC_0000225801-mRNA-1
ACOC_0000227101	ACOC_0000227101-mRNA-1
ACOC_0000228701	ACOC_0000228701-mRNA-1
ACOC_0000228801	ACOC_0000228801-mRNA-1
ACOC_0000230201	ACOC_0000230201-mRNA-1
ACOC_0000230601	ACOC_0000230601-mRNA-1
ACOC_0000231101	ACOC_0000231101-mRNA-1
ACOC_0000231901	ACOC_0000231901-mRNA-1
ACOC_0000232101	ACOC_0000232101-mRNA-1
ACOC_0000232501	ACOC_0000232501-mRNA-1
ACOC_0000232801	ACOC_0000232801-mRNA-1
ACOC_0000232901	ACOC_0000232901-mRNA-1
ACOC_0000233601	ACOC_0000233601-mRNA-1
ACOC_0000234301	ACOC_0000234301-mRNA-1
ACOC_0000235501	ACOC_0000235501-mRNA-1
ACOC_0000235601	ACOC_0000235601-mRNA-1
ACOC_0000237301	ACOC_0000237301-mRNA-1
ACOC_0000238401	ACOC_0000238401-mRNA-1
ACOC_0000239901	ACOC_0000239901-mRNA-1
ACOC_0000240001	ACOC_0000240001-mRNA-1
ACOC_0000240601	ACOC_0000240601-mRNA-1
ACOC_0000241101	ACOC_0000241101-mRNA-1
ACOC_0000241601	ACOC_0000241601-mRNA-1
ACOC_0000242201	ACOC_0000242201-mRNA-1
ACOC_0000242501	ACOC_0000242501-mRNA-1
ACOC_0000242701	ACOC_0000242701-mRNA-1
ACOC_0000244401	ACOC_0000244401-mRNA-1
ACOC_0000244501	ACOC_0000244501-mRNA-1
ACOC_0000245801	ACOC_0000245801-mRNA-1
ACOC_0000246501	ACOC_0000246501-mRNA-1
ACOC_0000246601	ACOC_0000246601-mRNA-1
ACOC_0000246801	ACOC_0000246801-mRNA-1
ACOC_0000247001	ACOC_0000247001-mRNA-1
ACOC_0000247101	ACOC_0000247101-mRNA-1
ACOC_0000247301	ACOC_0000247301-mRNA-1
ACOC_0000248101	ACOC_0000248101-mRNA-1
ACOC_0000248601	ACOC_0000248601-mRNA-1
ACOC_0000248801	ACOC_0000248801-mRNA-1
ACOC_0000248901	ACOC_0000248901-mRNA-1
ACOC_0000249601	ACOC_0000249601-mRNA-1
ACOC_0000251501	ACOC_0000251501-mRNA-1
ACOC_0000252301	ACOC_0000252301-mRNA-1
ACOC_0000255801	ACOC_0000255801-mRNA-1
ACOC_0000259101	ACOC_0000259101-mRNA-1
ACOC_0000260601	ACOC_0000260601-mRNA-1
ACOC_0000263301	ACOC_0000263301-mRNA-1
ACOC_0000263601	ACOC_0000263601-mRNA-1
ACOC_0000265801	ACOC_0000265801-mRNA-1
ACOC_0000269201	ACOC_0000269201-mRNA-1
ACOC_0000269401	ACOC_0000269401-mRNA-1
ACOC_0000270601	ACOC_0000270601-mRNA-1
ACOC_0000271901	ACOC_0000271901-mRNA-1
ACOC_0000272901	ACOC_0000272901-mRNA-1
ACOC_0000274401	ACOC_0000274401-mRNA-1
ACOC_0000276401	ACOC_0000276401-mRNA-1
ACOC_0000276901	ACOC_0000276901-mRNA-1
ACOC_0000277801	ACOC_0000277801-mRNA-1
ACOC_0000279601	ACOC_0000279601-mRNA-1
ACOC_0000281401	ACOC_0000281401-mRNA-1
ACOC_0000282401	ACOC_0000282401-mRNA-1
ACOC_0000282901	ACOC_0000282901-mRNA-1
ACOC_0000283201	ACOC_0000283201-mRNA-1
ACOC_0000284801	ACOC_0000284801-mRNA-1
ACOC_0000285101	ACOC_0000285101-mRNA-1
ACOC_0000285201	ACOC_0000285201-mRNA-1
ACOC_0000285301	ACOC_0000285301-mRNA-1
ACOC_0000286201	ACOC_0000286201-mRNA-1
ACOC_0000287101	ACOC_0000287101-mRNA-1
ACOC_0000287201	ACOC_0000287201-mRNA-1
ACOC_0000289201	ACOC_0000289201-mRNA-1
ACOC_0000289601	ACOC_0000289601-mRNA-1
ACOC_0000291901	ACOC_0000291901-mRNA-1
ACOC_0000293701	ACOC_0000293701-mRNA-1
ACOC_0000293901	ACOC_0000293901-mRNA-1
ACOC_0000294901	ACOC_0000294901-mRNA-1
ACOC_0000295601	ACOC_0000295601-mRNA-1
ACOC_0000296501	ACOC_0000296501-mRNA-1
ACOC_0000303101	ACOC_0000303101-mRNA-1
ACOC_0000303201	ACOC_0000303201-mRNA-1
ACOC_0000303601	ACOC_0000303601-mRNA-1
ACOC_0000304401	ACOC_0000304401-mRNA-1
ACOC_0000305501	ACOC_0000305501-mRNA-1
ACOC_0000305701	ACOC_0000305701-mRNA-1
ACOC_0000305901	ACOC_0000305901-mRNA-1
ACOC_0000306001	ACOC_0000306001-mRNA-1
ACOC_0000307401	ACOC_0000307401-mRNA-1
ACOC_0000307601	ACOC_0000307601-mRNA-1
ACOC_0000308601	ACOC_0000308601-mRNA-1
ACOC_0000309801	ACOC_0000309801-mRNA-1
ACOC_0000309901	ACOC_0000309901-mRNA-1
ACOC_0000310301	ACOC_0000310301-mRNA-1
ACOC_0000314201	ACOC_0000314201-mRNA-1
ACOC_0000315001	ACOC_0000315001-mRNA-1
ACOC_0000317001	ACOC_0000317001-mRNA-1
ACOC_0000318601	ACOC_0000318601-mRNA-1
ACOC_0000319201	ACOC_0000319201-mRNA-1
ACOC_0000322601	ACOC_0000322601-mRNA-1
ACOC_0000322801	ACOC_0000322801-mRNA-1
ACOC_0000323801	ACOC_0000323801-mRNA-1
ACOC_0000328401	ACOC_0000328401-mRNA-1
ACOC_0000329401	ACOC_0000329401-mRNA-1
ACOC_0000330601	ACOC_0000330601-mRNA-1
ACOC_0000330701	ACOC_0000330701-mRNA-1
ACOC_0000333101	ACOC_0000333101-mRNA-1
ACOC_0000333301	ACOC_0000333301-mRNA-1
ACOC_0000335401	ACOC_0000335401-mRNA-1
ACOC_0000335501	ACOC_0000335501-mRNA-1
ACOC_0000336101	ACOC_0000336101-mRNA-1
ACOC_0000336301	ACOC_0000336301-mRNA-1
ACOC_0000336501	ACOC_0000336501-mRNA-1
ACOC_0000338001	ACOC_0000338001-mRNA-1
ACOC_0000339301	ACOC_0000339301-mRNA-1
ACOC_0000340701	ACOC_0000340701-mRNA-1
ACOC_0000341101	ACOC_0000341101-mRNA-1
ACOC_0000341201	ACOC_0000341201-mRNA-1
ACOC_0000342001	ACOC_0000342001-mRNA-1
ACOC_0000343901	ACOC_0000343901-mRNA-1
ACOC_0000344501	ACOC_0000344501-mRNA-1
ACOC_0000345401	ACOC_0000345401-mRNA-1
ACOC_0000345901	ACOC_0000345901-mRNA-1
ACOC_0000346401	ACOC_0000346401-mRNA-1
ACOC_0000346501	ACOC_0000346501-mRNA-1
ACOC_0000347001	ACOC_0000347001-mRNA-1
ACOC_0000347101	ACOC_0000347101-mRNA-1
ACOC_0000348101	ACOC_0000348101-mRNA-1
ACOC_0000349601	ACOC_0000349601-mRNA-1
ACOC_0000350501	ACOC_0000350501-mRNA-1
ACOC_0000350701	ACOC_0000350701-mRNA-1
ACOC_0000352501	ACOC_0000352501-mRNA-1
ACOC_0000352701	ACOC_0000352701-mRNA-1
ACOC_0000353301	ACOC_0000353301-mRNA-1
ACOC_0000354301	ACOC_0000354301-mRNA-1
ACOC_0000354801	ACOC_0000354801-mRNA-1
ACOC_0000354901	ACOC_0000354901-mRNA-1
ACOC_0000355001	ACOC_0000355001-mRNA-1
ACOC_0000355501	ACOC_0000355501-mRNA-1
ACOC_0000355801	ACOC_0000355801-mRNA-1
ACOC_0000355901	ACOC_0000355901-mRNA-1
ACOC_0000356501	ACOC_0000356501-mRNA-1
ACOC_0000357001	ACOC_0000357001-mRNA-1
ACOC_0000357101	ACOC_0000357101-mRNA-1
ACOC_0000359401	ACOC_0000359401-mRNA-1
ACOC_0000359601	ACOC_0000359601-mRNA-1
ACOC_0000359701	ACOC_0000359701-mRNA-1
ACOC_0000361601	ACOC_0000361601-mRNA-1
ACOC_0000362601	ACOC_0000362601-mRNA-1
ACOC_0000363701	ACOC_0000363701-mRNA-1
ACOC_0000364301	ACOC_0000364301-mRNA-1
ACOC_0000365201	ACOC_0000365201-mRNA-1
ACOC_0000365501	ACOC_0000365501-mRNA-1
ACOC_0000366101	ACOC_0000366101-mRNA-1
ACOC_0000366301	ACOC_0000366301-mRNA-1
ACOC_0000366601	ACOC_0000366601-mRNA-1
ACOC_0000368601	ACOC_0000368601-mRNA-1
ACOC_0000368701	ACOC_0000368701-mRNA-1
ACOC_0000369601	ACOC_0000369601-mRNA-1
ACOC_0000371501	ACOC_0000371501-mRNA-1
ACOC_0000371801	ACOC_0000371801-mRNA-1
ACOC_0000372201	ACOC_0000372201-mRNA-1
ACOC_0000372901	ACOC_0000372901-mRNA-1
ACOC_0000373201	ACOC_0000373201-mRNA-1
ACOC_0000373301	ACOC_0000373301-mRNA-1
ACOC_0000373601	ACOC_0000373601-mRNA-1
ACOC_0000374501	ACOC_0000374501-mRNA-1
ACOC_0000374701	ACOC_0000374701-mRNA-1
ACOC_0000375301	ACOC_0000375301-mRNA-1
ACOC_0000375601	ACOC_0000375601-mRNA-1
ACOC_0000376101	ACOC_0000376101-mRNA-1
ACOC_0000377001	ACOC_0000377001-mRNA-1
ACOC_0000378001	ACOC_0000378001-mRNA-1
ACOC_0000378901	ACOC_0000378901-mRNA-1
ACOC_0000379401	ACOC_0000379401-mRNA-1
ACOC_0000380001	ACOC_0000380001-mRNA-1
ACOC_0000380201	ACOC_0000380201-mRNA-1
ACOC_0000381501	ACOC_0000381501-mRNA-1
ACOC_0000381701	ACOC_0000381701-mRNA-1
ACOC_0000382201	ACOC_0000382201-mRNA-1
ACOC_0000382401	ACOC_0000382401-mRNA-1
ACOC_0000382601	ACOC_0000382601-mRNA-1
ACOC_0000382801	ACOC_0000382801-mRNA-1
ACOC_0000382901	ACOC_0000382901-mRNA-1
ACOC_0000383001	ACOC_0000383001-mRNA-1
ACOC_0000383101	ACOC_0000383101-mRNA-1
ACOC_0000383701	ACOC_0000383701-mRNA-1
ACOC_0000384101	ACOC_0000384101-mRNA-1
ACOC_0000384401	ACOC_0000384401-mRNA-1
ACOC_0000384501	ACOC_0000384501-mRNA-1
ACOC_0000385001	ACOC_0000385001-mRNA-1
ACOC_0000385501	ACOC_0000385501-mRNA-1
ACOC_0000385601	ACOC_0000385601-mRNA-1
ACOC_0000386001	ACOC_0000386001-mRNA-1
ACOC_0000386201	ACOC_0000386201-mRNA-1
ACOC_0000386701	ACOC_0000386701-mRNA-1
ACOC_0000388501	ACOC_0000388501-mRNA-1
ACOC_0000389001	ACOC_0000389001-mRNA-1
ACOC_0000389301	ACOC_0000389301-mRNA-1
ACOC_0000390501	ACOC_0000390501-mRNA-1
ACOC_0000390801	ACOC_0000390801-mRNA-1
ACOC_0000391401	ACOC_0000391401-mRNA-1
ACOC_0000392101	ACOC_0000392101-mRNA-1
ACOC_0000392201	ACOC_0000392201-mRNA-1
ACOC_0000392301	ACOC_0000392301-mRNA-1
ACOC_0000392401	ACOC_0000392401-mRNA-1
ACOC_0000392601	ACOC_0000392601-mRNA-1
ACOC_0000393401	ACOC_0000393401-mRNA-1
ACOC_0000393901	ACOC_0000393901-mRNA-1
ACOC_0000395001	ACOC_0000395001-mRNA-1
ACOC_0000395201	ACOC_0000395201-mRNA-1
ACOC_0000396001	ACOC_0000396001-mRNA-1
ACOC_0000396201	ACOC_0000396201-mRNA-1
ACOC_0000396601	ACOC_0000396601-mRNA-1
ACOC_0000396901	ACOC_0000396901-mRNA-1
ACOC_0000397101	ACOC_0000397101-mRNA-1
ACOC_0000397401	ACOC_0000397401-mRNA-1
ACOC_0000397501	ACOC_0000397501-mRNA-1
ACOC_0000398201	ACOC_0000398201-mRNA-1
ACOC_0000399901	ACOC_0000399901-mRNA-1
ACOC_0000400101	ACOC_0000400101-mRNA-1
ACOC_0000400201	ACOC_0000400201-mRNA-1
ACOC_0000400601	ACOC_0000400601-mRNA-1
ACOC_0000400801	ACOC_0000400801-mRNA-1
ACOC_0000401201	ACOC_0000401201-mRNA-1
ACOC_0000402901	ACOC_0000402901-mRNA-1
ACOC_0000403301	ACOC_0000403301-mRNA-1
ACOC_0000403401	ACOC_0000403401-mRNA-1
ACOC_0000404001	ACOC_0000404001-mRNA-1
ACOC_0000404401	ACOC_0000404401-mRNA-1
ACOC_0000404801	ACOC_0000404801-mRNA-1
ACOC_0000405501	ACOC_0000405501-mRNA-1
ACOC_0000405801	ACOC_0000405801-mRNA-1
ACOC_0000406101	ACOC_0000406101-mRNA-1
ACOC_0000406301	ACOC_0000406301-mRNA-1
ACOC_0000406501	ACOC_0000406501-mRNA-1
ACOC_0000406701	ACOC_0000406701-mRNA-1
ACOC_0000407001	ACOC_0000407001-mRNA-1
ACOC_0000407201	ACOC_0000407201-mRNA-1
ACOC_0000407301	ACOC_0000407301-mRNA-1
ACOC_0000407401	ACOC_0000407401-mRNA-1
ACOC_0000407801	ACOC_0000407801-mRNA-1
ACOC_0000408901	ACOC_0000408901-mRNA-1
ACOC_0000409101	ACOC_0000409101-mRNA-1
ACOC_0000410301	ACOC_0000410301-mRNA-1
ACOC_0000410701	ACOC_0000410701-mRNA-1
ACOC_0000410801	ACOC_0000410801-mRNA-1
ACOC_0000411201	ACOC_0000411201-mRNA-1
ACOC_0000411701	ACOC_0000411701-mRNA-1
ACOC_0000412101	ACOC_0000412101-mRNA-1
[truncated: 1,059 more rows]
