# Supplementary material for: Identification of Novel Genes and Proteoforms in Angiostrongylus costaricensis through a Proteogenomic Approach
Source: Pathogens. 2022 Oct 31;11(11):1273. doi: 10.3390/pathogens11111273 (PMC9694666; doi:10.3390/pathogens11111273)
Supplement: Supplementary file 1 [file pathogens-11-01273-s001.zip › Supplemental_Data_S3.xlsx]

## Sheet: Split genes merged by BRAKER
Supplemental Data S3. Split genes merged by BRAKER
Novel gene IDs	Old gene IDs	IDs of transcripts overlapping the same locus
MSTRG.1001	ACOC_0000106601;ACOC_0000106701	ACOC_0000106601-mRNA-1;ACOC_0000106701-mRNA-1;MSTRG.1001.2
MSTRG.10015	ACOC_0001025101;ACOC_0001025201	ACOC_0001025101-mRNA-1;ACOC_0001025201-mRNA-1;MSTRG.10015.1;MSTRG.10015.2;MSTRG.10015.3
MSTRG.10020	ACOC_0001025701;ACOC_0001025801	ACOC_0001025701-mRNA-1;ACOC_0001025801-mRNA-1;MSTRG.10020.1
MSTRG.10028	ACOC_0001026601;ACOC_0001026701	ACOC_0001026601-mRNA-1;ACOC_0001026701-mRNA-1;MSTRG.10028.1
MSTRG.10037	ACOC_0001027601;ACOC_0001027701	ACOC_0001027601-mRNA-1;ACOC_0001027701-mRNA-1;MSTRG.10037.1
MSTRG.1006	ACOC_0000107201;ACOC_0000107301	ACOC_0000107201-mRNA-1;ACOC_0000107301-mRNA-1;MSTRG.1006.1
MSTRG.10072	ACOC_0001031101;ACOC_0001031201	ACOC_0001031101-mRNA-1;ACOC_0001031201-mRNA-1;MSTRG.10072.1;MSTRG.10072.2
MSTRG.10077	ACOC_0001031801;ACOC_0001031901	ACOC_0001031801-mRNA-1;ACOC_0001031901-mRNA-1;MSTRG.10077.1
MSTRG.10083	ACOC_0001032601;ACOC_0001032801	ACOC_0001032601-mRNA-1;ACOC_0001032801-mRNA-1;MSTRG.10083.1;MSTRG.10083.4
MSTRG.1009	ACOC_0000107601;ACOC_0000107701	ACOC_0000107601-mRNA-1;ACOC_0000107701-mRNA-1;MSTRG.1009.1
MSTRG.10094	ACOC_0001033701;ACOC_0001033801	ACOC_0001033701-mRNA-1;ACOC_0001033801-mRNA-1;MSTRG.10094.1
MSTRG.10096	ACOC_0001034001;ACOC_0001034101	ACOC_0001034001-mRNA-1;ACOC_0001034101-mRNA-1;MSTRG.10096.1
MSTRG.10109	ACOC_0001035401;ACOC_0001035501	ACOC_0001035401-mRNA-1;ACOC_0001035501-mRNA-1;MSTRG.10109.2
MSTRG.10173	ACOC_0001041101;ACOC_0001041201	ACOC_0001041101-mRNA-1;ACOC_0001041201-mRNA-1;MSTRG.10173.1
MSTRG.10174	ACOC_0001041301;ACOC_0001041401;ACOC_0001041501;ACOC_0001041601	ACOC_0001041301-mRNA-1;ACOC_0001041401-mRNA-1;ACOC_0001041501-mRNA-1;ACOC_0001041601-mRNA-1;MSTRG.10174.1
MSTRG.10182	ACOC_0001042501;ACOC_0001042601	ACOC_0001042501-mRNA-1;ACOC_0001042601-mRNA-1;MSTRG.10182.1
MSTRG.1022	ACOC_0000109001;ACOC_0000109101	ACOC_0000109001-mRNA-1;ACOC_0000109101-mRNA-1;MSTRG.1022.2
MSTRG.10228	ACOC_0001046501;ACOC_0001046601	ACOC_0001046501-mRNA-1;ACOC_0001046601-mRNA-1;MSTRG.10228.1;MSTRG.10228.3
MSTRG.10231	ACOC_0001046801;ACOC_0001046901	ACOC_0001046801-mRNA-1;ACOC_0001046901-mRNA-1;MSTRG.10231.1
MSTRG.10245	ACOC_0001048501;ACOC_0001048701	ACOC_0001048501-mRNA-1;ACOC_0001048701-mRNA-1;MSTRG.10245.1;MSTRG.10245.2
MSTRG.10260	ACOC_0001049801;ACOC_0001049901;ACOC_0001050001	ACOC_0001049801-mRNA-1;ACOC_0001049901-mRNA-1;ACOC_0001050001-mRNA-1;MSTRG.10260.1
MSTRG.1028	ACOC_0000109601;ACOC_0000109701	ACOC_0000109601-mRNA-1;ACOC_0000109701-mRNA-1;MSTRG.1028.1
MSTRG.10306	ACOC_0001054001;ACOC_0001054101	ACOC_0001054001-mRNA-1;ACOC_0001054101-mRNA-1;MSTRG.10306.1
MSTRG.10317	ACOC_0001055101;ACOC_0001055301	ACOC_0001055101-mRNA-1;ACOC_0001055301-mRNA-1;MSTRG.10317.1;MSTRG.10317.2;MSTRG.10317.3;MSTRG.10317.4
MSTRG.10319	ACOC_0001055501;ACOC_0001055601	ACOC_0001055501-mRNA-1;ACOC_0001055601-mRNA-1;MSTRG.10319.1;MSTRG.10319.2;MSTRG.10319.3
MSTRG.1032	ACOC_0000110001;ACOC_0000110101	ACOC_0000110001-mRNA-1;ACOC_0000110101-mRNA-1;MSTRG.1032.1;MSTRG.1032.4
MSTRG.10334	ACOC_0001057101;ACOC_0001057201;ACOC_0001057301	ACOC_0001057101-mRNA-1;ACOC_0001057201-mRNA-1;ACOC_0001057301-mRNA-1;MSTRG.10334.2
MSTRG.10356	ACOC_0001059101;ACOC_0001059201	ACOC_0001059101-mRNA-1;ACOC_0001059201-mRNA-1;MSTRG.10356.1
MSTRG.10366	ACOC_0001060701;ACOC_0001060801	ACOC_0001060701-mRNA-1;ACOC_0001060801-mRNA-1;MSTRG.10366.1;MSTRG.10366.2;MSTRG.10366.4
MSTRG.10373	ACOC_0001061501;ACOC_0001061601;ACOC_0001061701;ACOC_0001061801	ACOC_0001061501-mRNA-1;ACOC_0001061601-mRNA-1;ACOC_0001061701-mRNA-1;ACOC_0001061801-mRNA-1;MSTRG.10373.1;MSTRG.10373.2
MSTRG.10378	ACOC_0001062401;ACOC_0001062601	ACOC_0001062401-mRNA-1;ACOC_0001062601-mRNA-1;MSTRG.10378.1;MSTRG.10378.4
MSTRG.10384	ACOC_0001063101;ACOC_0001063201	ACOC_0001063101-mRNA-1;ACOC_0001063201-mRNA-1;MSTRG.10384.1;MSTRG.10384.2
MSTRG.10385	ACOC_0001063301;ACOC_0001063501	ACOC_0001063301-mRNA-1;ACOC_0001063501-mRNA-1;MSTRG.10385.1;MSTRG.10385.2
MSTRG.10395	ACOC_0001064401;ACOC_0001064501	ACOC_0001064401-mRNA-1;ACOC_0001064501-mRNA-1;MSTRG.10395.2;MSTRG.10395.3;MSTRG.10395.4
MSTRG.1040	ACOC_0000110901;ACOC_0000111001	ACOC_0000110901-mRNA-1;ACOC_0000111001-mRNA-1;MSTRG.1040.1
MSTRG.10425	ACOC_0001067701;ACOC_0001067801	ACOC_0001067701-mRNA-1;ACOC_0001067801-mRNA-1;MSTRG.10425.1
MSTRG.10447	ACOC_0001069601;ACOC_0001069701;ACOC_0001069801	ACOC_0001069601-mRNA-1;ACOC_0001069701-mRNA-1;ACOC_0001069801-mRNA-1;MSTRG.10447.1
MSTRG.10449	ACOC_0001070001;ACOC_0001070101	ACOC_0001070001-mRNA-1;ACOC_0001070101-mRNA-1;MSTRG.10449.1;MSTRG.10449.2
MSTRG.10456	ACOC_0001070801;ACOC_0001070901	ACOC_0001070801-mRNA-1;ACOC_0001070901-mRNA-1;MSTRG.10456.1;MSTRG.10456.2
MSTRG.10467	ACOC_0001071701;ACOC_0001071801	ACOC_0001071701-mRNA-1;ACOC_0001071801-mRNA-1;MSTRG.10467.1
MSTRG.10477	ACOC_0001072601;ACOC_0001072701	ACOC_0001072601-mRNA-1;ACOC_0001072701-mRNA-1;MSTRG.10477.1
MSTRG.1048	ACOC_0000111601;ACOC_0000111701	ACOC_0000111601-mRNA-1;ACOC_0000111701-mRNA-1;MSTRG.1048.2
MSTRG.10489	ACOC_0001073801;ACOC_0001073901	ACOC_0001073801-mRNA-1;ACOC_0001073901-mRNA-1;MSTRG.10489.1
MSTRG.10490	ACOC_0001074001;ACOC_0001074101	ACOC_0001074001-mRNA-1;ACOC_0001074101-mRNA-1;MSTRG.10490.1;MSTRG.10490.4
MSTRG.10492	ACOC_0001074201;ACOC_0001074301	ACOC_0001074201-mRNA-1;ACOC_0001074301-mRNA-1;MSTRG.10492.1
MSTRG.10498	ACOC_0001074801;ACOC_0001074901	ACOC_0001074801-mRNA-1;ACOC_0001074901-mRNA-1;MSTRG.10498.2
MSTRG.10505	ACOC_0001075701;ACOC_0001075801	ACOC_0001075701-mRNA-1;ACOC_0001075801-mRNA-1;MSTRG.10505.2;MSTRG.10505.3
MSTRG.10512	ACOC_0001076501;ACOC_0001076601	ACOC_0001076501-mRNA-1;ACOC_0001076601-mRNA-1;MSTRG.10512.1;MSTRG.10512.2
MSTRG.10516	ACOC_0001077001;ACOC_0001077101	ACOC_0001077001-mRNA-1;ACOC_0001077101-mRNA-1;MSTRG.10516.1
MSTRG.1053	ACOC_0000112101;ACOC_0000112201	ACOC_0000112101-mRNA-1;ACOC_0000112201-mRNA-1;MSTRG.1053.1
MSTRG.10537	ACOC_0001079301;ACOC_0001079401	ACOC_0001079301-mRNA-1;ACOC_0001079401-mRNA-1;MSTRG.10537.1
MSTRG.10544	ACOC_0001080101;ACOC_0001080301;ACOC_0001080501	ACOC_0001080101-mRNA-1;ACOC_0001080301-mRNA-1;ACOC_0001080501-mRNA-1;MSTRG.10544.1
MSTRG.10551	ACOC_0001081001;ACOC_0001081101	ACOC_0001081001-mRNA-1;ACOC_0001081101-mRNA-1;MSTRG.10551.1
MSTRG.10552	ACOC_0001081201;ACOC_0001081301	ACOC_0001081201-mRNA-1;ACOC_0001081301-mRNA-1;MSTRG.10552.1
MSTRG.10554	ACOC_0001081501;ACOC_0001081601	ACOC_0001081501-mRNA-1;ACOC_0001081601-mRNA-1;MSTRG.10554.1;MSTRG.10554.2
MSTRG.10569	ACOC_0001082901;ACOC_0001083001	ACOC_0001082901-mRNA-1;ACOC_0001083001-mRNA-1;MSTRG.10569.1
MSTRG.10579	ACOC_0001084101;ACOC_0001084201	ACOC_0001084101-mRNA-1;ACOC_0001084201-mRNA-1;MSTRG.10579.1
MSTRG.10597	ACOC_0001085801;ACOC_0001085901	ACOC_0001085801-mRNA-1;ACOC_0001085901-mRNA-1;MSTRG.10597.1;MSTRG.10597.3
MSTRG.106	ACOC_0000012501;ACOC_0000012701	ACOC_0000012501-mRNA-1;ACOC_0000012701-mRNA-1;MSTRG.106.1;MSTRG.106.2
MSTRG.10605	ACOC_0001087001;ACOC_0001087101	ACOC_0001087001-mRNA-1;ACOC_0001087101-mRNA-1;MSTRG.10605.1;MSTRG.10605.2;MSTRG.10605.3;MSTRG.10605.4
MSTRG.10615	ACOC_0001088001;ACOC_0001088101	ACOC_0001088001-mRNA-1;ACOC_0001088101-mRNA-1;MSTRG.10615.1;MSTRG.10615.2;MSTRG.10615.5
MSTRG.10627	ACOC_0001089001;ACOC_0001089101	ACOC_0001089001-mRNA-1;ACOC_0001089101-mRNA-1;MSTRG.10627.1
MSTRG.10641	ACOC_0001090501;ACOC_0001090601	ACOC_0001090501-mRNA-1;ACOC_0001090601-mRNA-1;MSTRG.10641.1
MSTRG.10649	ACOC_0001091101;ACOC_0001091201	ACOC_0001091101-mRNA-1;ACOC_0001091201-mRNA-1;MSTRG.10649.1
MSTRG.10663	ACOC_0001092201;ACOC_0001092301	ACOC_0001092201-mRNA-1;ACOC_0001092301-mRNA-1;MSTRG.10663.1;MSTRG.10663.2;MSTRG.10663.3
MSTRG.10664	ACOC_0001092401;ACOC_0001092501;ACOC_0001092601;ACOC_0001092801	ACOC_0001092401-mRNA-1;ACOC_0001092501-mRNA-1;ACOC_0001092601-mRNA-1;ACOC_0001092801-mRNA-1;MSTRG.10664.2;MSTRG.10664.3
MSTRG.10672	ACOC_0001093601;ACOC_0001093701	ACOC_0001093601-mRNA-1;ACOC_0001093701-mRNA-1;MSTRG.10672.1
MSTRG.10688	ACOC_0001095001;ACOC_0001095101;ACOC_0001095201	ACOC_0001095001-mRNA-1;ACOC_0001095101-mRNA-1;ACOC_0001095201-mRNA-1;MSTRG.10688.1
MSTRG.10691	ACOC_0001095501;ACOC_0001095601	ACOC_0001095501-mRNA-1;ACOC_0001095601-mRNA-1;MSTRG.10691.1;MSTRG.10691.2;MSTRG.10691.4
MSTRG.10695	ACOC_0001096001;ACOC_0001096101	ACOC_0001096001-mRNA-1;ACOC_0001096101-mRNA-1;MSTRG.10695.2;MSTRG.10695.4;MSTRG.10695.5
MSTRG.10705	ACOC_0001096801;ACOC_0001096901	ACOC_0001096801-mRNA-1;ACOC_0001096901-mRNA-1;MSTRG.10705.1
MSTRG.10726	ACOC_0001099001;ACOC_0001099101	ACOC_0001099001-mRNA-1;ACOC_0001099101-mRNA-1;MSTRG.10726.1
MSTRG.10728	ACOC_0001099301;ACOC_0001099401	ACOC_0001099301-mRNA-1;ACOC_0001099401-mRNA-1;MSTRG.10728.1;MSTRG.10728.2
MSTRG.10734	ACOC_0001099901;ACOC_0001100101;ACOC_0001100201	ACOC_0001099901-mRNA-1;ACOC_0001100101-mRNA-1;ACOC_0001100201-mRNA-1;MSTRG.10734.1;MSTRG.10734.2;MSTRG.10734.3;MSTRG.10734.4
MSTRG.10738	ACOC_0001100401;ACOC_0001100501	ACOC_0001100401-mRNA-1;ACOC_0001100501-mRNA-1;MSTRG.10738.1
MSTRG.10742	ACOC_0001100901;ACOC_0001101001	ACOC_0001100901-mRNA-1;ACOC_0001101001-mRNA-1;MSTRG.10742.1
MSTRG.10749	ACOC_0001101701;ACOC_0001101801	ACOC_0001101701-mRNA-1;ACOC_0001101801-mRNA-1;MSTRG.10749.1
MSTRG.10751	ACOC_0001102001;ACOC_0001102201	ACOC_0001102001-mRNA-1;ACOC_0001102201-mRNA-1;MSTRG.10751.1
MSTRG.10754	ACOC_0001102401;ACOC_0001102501;ACOC_0001102601	ACOC_0001102401-mRNA-1;ACOC_0001102501-mRNA-1;ACOC_0001102601-mRNA-1;MSTRG.10754.1;MSTRG.10754.2
MSTRG.10756	ACOC_0001102801;ACOC_0001102901	ACOC_0001102801-mRNA-1;ACOC_0001102901-mRNA-1;MSTRG.10756.1
MSTRG.1076	ACOC_0000114301;ACOC_0000114401	ACOC_0000114301-mRNA-1;ACOC_0000114401-mRNA-1;MSTRG.1076.1;MSTRG.1076.2
MSTRG.10764	ACOC_0001103501;ACOC_0001103601	ACOC_0001103501-mRNA-1;ACOC_0001103601-mRNA-1;MSTRG.10764.2
MSTRG.1078	ACOC_0000114701;ACOC_0000114801	ACOC_0000114701-mRNA-1;ACOC_0000114801-mRNA-1;MSTRG.1078.1;MSTRG.1078.2
MSTRG.10781	ACOC_0001105701;ACOC_0001105801	ACOC_0001105701-mRNA-1;ACOC_0001105801-mRNA-1;MSTRG.10781.1
MSTRG.10805	ACOC_0001108201;ACOC_0001108301	ACOC_0001108201-mRNA-1;ACOC_0001108301-mRNA-1;MSTRG.10805.1;MSTRG.10805.2
MSTRG.10812	ACOC_0001108901;ACOC_0001109001	ACOC_0001108901-mRNA-1;ACOC_0001109001-mRNA-1;MSTRG.10812.1
MSTRG.10814	ACOC_0001109201;ACOC_0001109301	ACOC_0001109201-mRNA-1;ACOC_0001109301-mRNA-1;MSTRG.10814.1
MSTRG.10839	ACOC_0001110901;ACOC_0001111001;ACOC_0001111101	ACOC_0001110901-mRNA-1;ACOC_0001111001-mRNA-1;ACOC_0001111101-mRNA-1;MSTRG.10839.2
MSTRG.10846	ACOC_0001111801;ACOC_0001111901	ACOC_0001111801-mRNA-1;ACOC_0001111901-mRNA-1;MSTRG.10846.1
MSTRG.10847	ACOC_0001112001;ACOC_0001112101	ACOC_0001112001-mRNA-1;ACOC_0001112101-mRNA-1;MSTRG.10847.1;MSTRG.10847.2;MSTRG.10847.5
MSTRG.10885	ACOC_0001115701;ACOC_0001115801;ACOC_0001115901	ACOC_0001115701-mRNA-1;ACOC_0001115801-mRNA-1;ACOC_0001115901-mRNA-1;MSTRG.10885.1
MSTRG.10904	ACOC_0001117401;ACOC_0001117501	ACOC_0001117401-mRNA-1;ACOC_0001117501-mRNA-1;MSTRG.10904.1;MSTRG.10904.2
MSTRG.10913	ACOC_0001118401;ACOC_0001118501	ACOC_0001118401-mRNA-1;ACOC_0001118501-mRNA-1;MSTRG.10913.1
MSTRG.10944	ACOC_0001121301;ACOC_0001121401	ACOC_0001121301-mRNA-1;ACOC_0001121401-mRNA-1;MSTRG.10944.1;MSTRG.10944.3
MSTRG.1096	ACOC_0000116301;ACOC_0000116401	ACOC_0000116301-mRNA-1;ACOC_0000116401-mRNA-1;MSTRG.1096.2
MSTRG.10973	ACOC_0001123801;ACOC_0001123901	ACOC_0001123801-mRNA-1;ACOC_0001123901-mRNA-1;MSTRG.10973.1;MSTRG.10973.4
MSTRG.10975	ACOC_0001124101;ACOC_0001124401	ACOC_0001124101-mRNA-1;ACOC_0001124401-mRNA-1;MSTRG.10975.1;MSTRG.10975.2
MSTRG.10988	ACOC_0001125401;ACOC_0001125501	ACOC_0001125401-mRNA-1;ACOC_0001125501-mRNA-1;MSTRG.10988.1
MSTRG.11000	ACOC_0001127001;ACOC_0001127101	ACOC_0001127001-mRNA-1;ACOC_0001127101-mRNA-1;MSTRG.11000.1
MSTRG.11008	ACOC_0001127701;ACOC_0001127801	ACOC_0001127701-mRNA-1;ACOC_0001127801-mRNA-1;MSTRG.11008.1;MSTRG.11008.2
MSTRG.11019	ACOC_0001128901;ACOC_0001129001	ACOC_0001128901-mRNA-1;ACOC_0001129001-mRNA-1;MSTRG.11019.1
MSTRG.11027	ACOC_0001129701;ACOC_0001129801	ACOC_0001129701-mRNA-1;ACOC_0001129801-mRNA-1;MSTRG.11027.1;MSTRG.11027.2
MSTRG.11033	ACOC_0001130201;ACOC_0001130301	ACOC_0001130201-mRNA-1;ACOC_0001130301-mRNA-1;MSTRG.11033.1
MSTRG.11078	ACOC_0001134401;ACOC_0001134501	ACOC_0001134401-mRNA-1;ACOC_0001134501-mRNA-1;MSTRG.11078.1
MSTRG.11085	ACOC_0001135201;ACOC_0001135301	ACOC_0001135201-mRNA-1;ACOC_0001135301-mRNA-1;MSTRG.11085.1;MSTRG.11085.2;MSTRG.11085.3;MSTRG.11085.4
MSTRG.11091	ACOC_0001136001;ACOC_0001136201	ACOC_0001136001-mRNA-1;ACOC_0001136201-mRNA-1;MSTRG.11091.1
MSTRG.11117	ACOC_0001138501;ACOC_0001138601	ACOC_0001138501-mRNA-1;ACOC_0001138601-mRNA-1;MSTRG.11117.1
MSTRG.11127	ACOC_0001139601;ACOC_0001139701	ACOC_0001139601-mRNA-1;ACOC_0001139701-mRNA-1;MSTRG.11127.1
MSTRG.11135	ACOC_0001140501;ACOC_0001140601	ACOC_0001140501-mRNA-1;ACOC_0001140601-mRNA-1;MSTRG.11135.1
MSTRG.1114	ACOC_0000118301;ACOC_0000118401	ACOC_0000118301-mRNA-1;ACOC_0000118401-mRNA-1;MSTRG.1114.1
MSTRG.11147	ACOC_0001142101;ACOC_0001142201	ACOC_0001142101-mRNA-1;ACOC_0001142201-mRNA-1;MSTRG.11147.1
MSTRG.11163	ACOC_0001143801;ACOC_0001143901	ACOC_0001143801-mRNA-1;ACOC_0001143901-mRNA-1;MSTRG.11163.1
MSTRG.11175	ACOC_0001145101;ACOC_0001145201	ACOC_0001145101-mRNA-1;ACOC_0001145201-mRNA-1;MSTRG.11175.1;MSTRG.11175.2
MSTRG.11191	ACOC_0001146601;ACOC_0001146701	ACOC_0001146601-mRNA-1;ACOC_0001146701-mRNA-1;MSTRG.11191.1
MSTRG.11197	ACOC_0001147301;ACOC_0001147401	ACOC_0001147301-mRNA-1;ACOC_0001147401-mRNA-1;MSTRG.11197.1
MSTRG.1123	ACOC_0000119301;ACOC_0000119401	ACOC_0000119301-mRNA-1;ACOC_0000119401-mRNA-1;MSTRG.1123.1
MSTRG.11235	ACOC_0001151401;ACOC_0001151601	ACOC_0001151401-mRNA-1;ACOC_0001151601-mRNA-1;MSTRG.11235.2
MSTRG.11238	ACOC_0001151801;ACOC_0001152001	ACOC_0001151801-mRNA-1;ACOC_0001152001-mRNA-1;MSTRG.11238.1;MSTRG.11238.3
MSTRG.1125	ACOC_0000119601;ACOC_0000119801	ACOC_0000119601-mRNA-1;ACOC_0000119801-mRNA-1;MSTRG.1125.1
MSTRG.11251	ACOC_0001153001;ACOC_0001153101;ACOC_0001153201	ACOC_0001153001-mRNA-1;ACOC_0001153101-mRNA-1;ACOC_0001153201-mRNA-1;MSTRG.11251.1;MSTRG.11251.2;MSTRG.11251.3;MSTRG.11251.7
MSTRG.11252	ACOC_0001153401;ACOC_0001153501	ACOC_0001153401-mRNA-1;ACOC_0001153501-mRNA-1;MSTRG.11252.1
MSTRG.11258	ACOC_0001154001;ACOC_0001154101	ACOC_0001154001-mRNA-1;ACOC_0001154101-mRNA-1;MSTRG.11258.2
MSTRG.11259	ACOC_0001154201;ACOC_0001154301	ACOC_0001154201-mRNA-1;ACOC_0001154301-mRNA-1;MSTRG.11259.2
MSTRG.11261	ACOC_0001154601;ACOC_0001154701	ACOC_0001154601-mRNA-1;ACOC_0001154701-mRNA-1;MSTRG.11261.1
MSTRG.11265	ACOC_0001155001;ACOC_0001155101	ACOC_0001155001-mRNA-1;ACOC_0001155101-mRNA-1;MSTRG.11265.1
MSTRG.11275	ACOC_0001156001;ACOC_0001156201	ACOC_0001156001-mRNA-1;ACOC_0001156201-mRNA-1;MSTRG.11275.1;MSTRG.11275.2;MSTRG.11275.3
MSTRG.11278	ACOC_0001156401;ACOC_0001156501	ACOC_0001156401-mRNA-1;ACOC_0001156501-mRNA-1;MSTRG.11278.1
MSTRG.11281	ACOC_0001156801;ACOC_0001156901	ACOC_0001156801-mRNA-1;ACOC_0001156901-mRNA-1;MSTRG.11281.1;MSTRG.11281.2
MSTRG.11299	ACOC_0001158601;ACOC_0001158701	ACOC_0001158601-mRNA-1;ACOC_0001158701-mRNA-1;MSTRG.11299.1
MSTRG.11318	ACOC_0001160501;ACOC_0001160601	ACOC_0001160501-mRNA-1;ACOC_0001160601-mRNA-1;MSTRG.11318.1;MSTRG.11318.2
MSTRG.1133	ACOC_0000120301;ACOC_0000120401	ACOC_0000120301-mRNA-1;ACOC_0000120401-mRNA-1;MSTRG.1133.1
MSTRG.11330	ACOC_0001161501;ACOC_0001161601;ACOC_0001161701;ACOC_0001161801;ACOC_0001161901	ACOC_0001161501-mRNA-1;ACOC_0001161601-mRNA-1;ACOC_0001161701-mRNA-1;ACOC_0001161801-mRNA-1;ACOC_0001161901-mRNA-1;MSTRG.11330.1;MSTRG.11330.2
MSTRG.11335	ACOC_0001162201;ACOC_0001162301	ACOC_0001162201-mRNA-1;ACOC_0001162301-mRNA-1;MSTRG.11335.1
MSTRG.11336	ACOC_0001162401;ACOC_0001162501	ACOC_0001162401-mRNA-1;ACOC_0001162501-mRNA-1;MSTRG.11336.1;MSTRG.11336.3
MSTRG.11361	ACOC_0001164701;ACOC_0001164801	ACOC_0001164701-mRNA-1;ACOC_0001164801-mRNA-1;MSTRG.11361.1;MSTRG.11361.2
MSTRG.11369	ACOC_0001165401;ACOC_0001165501	ACOC_0001165401-mRNA-1;ACOC_0001165501-mRNA-1;MSTRG.11369.1;MSTRG.11369.2;MSTRG.11369.3
MSTRG.1141	ACOC_0000121001;ACOC_0000121101	ACOC_0000121001-mRNA-1;ACOC_0000121101-mRNA-1;MSTRG.1141.1
MSTRG.11434	ACOC_0001170901;ACOC_0001171001	ACOC_0001170901-mRNA-1;ACOC_0001171001-mRNA-1;MSTRG.11434.1
MSTRG.11453	ACOC_0001172601;ACOC_0001172701	ACOC_0001172601-mRNA-1;ACOC_0001172701-mRNA-1;MSTRG.11453.1
MSTRG.11462	ACOC_0001173401;ACOC_0001173501	ACOC_0001173401-mRNA-1;ACOC_0001173501-mRNA-1;MSTRG.11462.1
MSTRG.11468	ACOC_0001174301;ACOC_0001174401	ACOC_0001174301-mRNA-1;ACOC_0001174401-mRNA-1;MSTRG.11468.2
MSTRG.1147	ACOC_0000121801;ACOC_0000121901	ACOC_0000121801-mRNA-1;ACOC_0000121901-mRNA-1;MSTRG.1147.1;MSTRG.1147.4
MSTRG.11485	ACOC_0001175801;ACOC_0001175901	ACOC_0001175801-mRNA-1;ACOC_0001175901-mRNA-1;MSTRG.11485.2
MSTRG.11488	ACOC_0001176201;ACOC_0001176301;ACOC_0001176401	ACOC_0001176201-mRNA-1;ACOC_0001176301-mRNA-1;ACOC_0001176401-mRNA-1;MSTRG.11488.1
MSTRG.11509	ACOC_0001178201;ACOC_0001178301	ACOC_0001178201-mRNA-1;ACOC_0001178301-mRNA-1;MSTRG.11509.1
MSTRG.11514	ACOC_0001178901;ACOC_0001179001	ACOC_0001178901-mRNA-1;ACOC_0001179001-mRNA-1;MSTRG.11514.2
MSTRG.11520	ACOC_0001179801;ACOC_0001179901	ACOC_0001179801-mRNA-1;ACOC_0001179901-mRNA-1;MSTRG.11520.1
MSTRG.11526	ACOC_0001180501;ACOC_0001180601	ACOC_0001180501-mRNA-1;ACOC_0001180601-mRNA-1;MSTRG.11526.1;MSTRG.11526.3
MSTRG.11535	ACOC_0001181401;ACOC_0001181501	ACOC_0001181401-mRNA-1;ACOC_0001181501-mRNA-1;MSTRG.11535.1
MSTRG.11536	ACOC_0001181601;ACOC_0001181701	ACOC_0001181601-mRNA-1;ACOC_0001181701-mRNA-1;MSTRG.11536.1;MSTRG.11536.4
MSTRG.11537	ACOC_0001181801;ACOC_0001181901	ACOC_0001181801-mRNA-1;ACOC_0001181901-mRNA-1;MSTRG.11537.1;MSTRG.11537.2;MSTRG.11537.3
MSTRG.1154	ACOC_0000122401;ACOC_0000122501;ACOC_0000122601	ACOC_0000122401-mRNA-1;ACOC_0000122501-mRNA-1;ACOC_0000122601-mRNA-1;MSTRG.1154.2;MSTRG.1154.3;MSTRG.1154.4
MSTRG.11554	ACOC_0001183801;ACOC_0001183901	ACOC_0001183801-mRNA-1;ACOC_0001183901-mRNA-1;MSTRG.11554.1
MSTRG.11558	ACOC_0001184401;ACOC_0001184501	ACOC_0001184401-mRNA-1;ACOC_0001184501-mRNA-1;MSTRG.11558.1
MSTRG.1156	ACOC_0000122701;ACOC_0000122801;ACOC_0000123001;ACOC_0000123101	ACOC_0000122701-mRNA-1;ACOC_0000122801-mRNA-1;ACOC_0000123001-mRNA-1;ACOC_0000123101-mRNA-1;MSTRG.1156.1;MSTRG.1156.2
MSTRG.11575	ACOC_0001186101;ACOC_0001186201	ACOC_0001186101-mRNA-1;ACOC_0001186201-mRNA-1;MSTRG.11575.1
MSTRG.11582	ACOC_0001186901;ACOC_0001187001	ACOC_0001186901-mRNA-1;ACOC_0001187001-mRNA-1;MSTRG.11582.1;MSTRG.11582.2
MSTRG.11587	ACOC_0001187301;ACOC_0001187401	ACOC_0001187301-mRNA-1;ACOC_0001187401-mRNA-1;MSTRG.11587.1
MSTRG.11589	ACOC_0001187601;ACOC_0001187701	ACOC_0001187601-mRNA-1;ACOC_0001187701-mRNA-1;MSTRG.11589.1;MSTRG.11589.2
MSTRG.1159	ACOC_0000123301;ACOC_0000123401	ACOC_0000123301-mRNA-1;ACOC_0000123401-mRNA-1;MSTRG.1159.1
MSTRG.11594	ACOC_0001188301;ACOC_0001188401	ACOC_0001188301-mRNA-1;ACOC_0001188401-mRNA-1;MSTRG.11594.2;MSTRG.11594.3
MSTRG.11611	ACOC_0001190201;ACOC_0001190301	ACOC_0001190201-mRNA-1;ACOC_0001190301-mRNA-1;MSTRG.11611.1
MSTRG.11623	ACOC_0001191601;ACOC_0001191701	ACOC_0001191601-mRNA-1;ACOC_0001191701-mRNA-1;MSTRG.11623.1;MSTRG.11623.2
MSTRG.11625	ACOC_0001191901;ACOC_0001192001	ACOC_0001191901-mRNA-1;ACOC_0001192001-mRNA-1;MSTRG.11625.1
MSTRG.11626	ACOC_0001192201;ACOC_0001192301	ACOC_0001192201-mRNA-1;ACOC_0001192301-mRNA-1;MSTRG.11626.1
MSTRG.11651	ACOC_0001194701;ACOC_0001194801	ACOC_0001194701-mRNA-1;ACOC_0001194801-mRNA-1;MSTRG.11651.1
MSTRG.11679	ACOC_0001197101;ACOC_0001197201	ACOC_0001197101-mRNA-1;ACOC_0001197201-mRNA-1;MSTRG.11679.1
MSTRG.1168	ACOC_0000124201;ACOC_0000124301	ACOC_0000124201-mRNA-1;ACOC_0000124301-mRNA-1;MSTRG.1168.1
MSTRG.11688	ACOC_0001198001;ACOC_0001198301	ACOC_0001198001-mRNA-1;ACOC_0001198301-mRNA-1;MSTRG.11688.2;MSTRG.11688.3
MSTRG.11692	ACOC_0001198601;ACOC_0001198701	ACOC_0001198601-mRNA-1;ACOC_0001198701-mRNA-1;MSTRG.11692.1;MSTRG.11692.2
MSTRG.11723	ACOC_0001201701;ACOC_0001201801	ACOC_0001201701-mRNA-1;ACOC_0001201801-mRNA-1;MSTRG.11723.1;MSTRG.11723.2
MSTRG.11736	ACOC_0001203101;ACOC_0001203301	ACOC_0001203101-mRNA-1;ACOC_0001203301-mRNA-1;MSTRG.11736.1
MSTRG.11773	ACOC_0001206201;ACOC_0001206301	ACOC_0001206201-mRNA-1;ACOC_0001206301-mRNA-1;MSTRG.11773.1
MSTRG.11778	ACOC_0001206901;ACOC_0001207001	ACOC_0001206901-mRNA-1;ACOC_0001207001-mRNA-1;MSTRG.11778.1
MSTRG.11798	ACOC_0001209401;ACOC_0001209501	ACOC_0001209401-mRNA-1;ACOC_0001209501-mRNA-1;MSTRG.11798.1
MSTRG.11814	ACOC_0001211101;ACOC_0001211201	ACOC_0001211101-mRNA-1;ACOC_0001211201-mRNA-1;MSTRG.11814.1;MSTRG.11814.2
MSTRG.11818	ACOC_0001211601;ACOC_0001211701	ACOC_0001211601-mRNA-1;ACOC_0001211701-mRNA-1;MSTRG.11818.1
MSTRG.11827	ACOC_0001212801;ACOC_0001212901	ACOC_0001212801-mRNA-1;ACOC_0001212901-mRNA-1;MSTRG.11827.1
MSTRG.11857	ACOC_0001215401;ACOC_0001215501	ACOC_0001215401-mRNA-1;ACOC_0001215501-mRNA-1;MSTRG.11857.1
MSTRG.11866	ACOC_0001216401;ACOC_0001216501	ACOC_0001216401-mRNA-1;ACOC_0001216501-mRNA-1;MSTRG.11866.1
MSTRG.11867	ACOC_0001216601;ACOC_0001216801	ACOC_0001216601-mRNA-1;ACOC_0001216801-mRNA-1;MSTRG.11867.1
MSTRG.11876	ACOC_0001217701;ACOC_0001217901	ACOC_0001217701-mRNA-1;ACOC_0001217901-mRNA-1;MSTRG.11876.2
MSTRG.11881	ACOC_0001218301;ACOC_0001218401;ACOC_0001218501	ACOC_0001218301-mRNA-1;ACOC_0001218401-mRNA-1;ACOC_0001218501-mRNA-1;MSTRG.11881.1;MSTRG.11881.3
MSTRG.11885	ACOC_0001218801;ACOC_0001218901;ACOC_0001219001	ACOC_0001218801-mRNA-1;ACOC_0001218901-mRNA-1;ACOC_0001219001-mRNA-1;MSTRG.11885.1
MSTRG.11898	ACOC_0001220301;ACOC_0001220401	ACOC_0001220301-mRNA-1;ACOC_0001220401-mRNA-1;MSTRG.11898.1
MSTRG.1192	ACOC_0000126601;ACOC_0000126701;ACOC_0000126801	ACOC_0000126601-mRNA-1;ACOC_0000126701-mRNA-1;ACOC_0000126801-mRNA-1;MSTRG.1192.2
MSTRG.11924	ACOC_0001222201;ACOC_0001222301	ACOC_0001222201-mRNA-1;ACOC_0001222301-mRNA-1;MSTRG.11924.1
MSTRG.11929	ACOC_0001222701;ACOC_0001222801	ACOC_0001222701-mRNA-1;ACOC_0001222801-mRNA-1;MSTRG.11929.1
MSTRG.11936	ACOC_0001223301;ACOC_0001223401	ACOC_0001223301-mRNA-1;ACOC_0001223401-mRNA-1;MSTRG.11936.1
MSTRG.11951	ACOC_0001225101;ACOC_0001225201	ACOC_0001225101-mRNA-1;ACOC_0001225201-mRNA-1;MSTRG.11951.2
MSTRG.11963	ACOC_0001226501;ACOC_0001226601	ACOC_0001226501-mRNA-1;ACOC_0001226601-mRNA-1;MSTRG.11963.1;MSTRG.11963.2
MSTRG.11969	ACOC_0001227001;ACOC_0001227101	ACOC_0001227001-mRNA-1;ACOC_0001227101-mRNA-1;MSTRG.11969.1
MSTRG.12013	ACOC_0001231201;ACOC_0001231301	ACOC_0001231201-mRNA-1;ACOC_0001231301-mRNA-1;MSTRG.12013.1;MSTRG.12013.3
MSTRG.1202	ACOC_0000127501;ACOC_0000127701;ACOC_0000127801	ACOC_0000127501-mRNA-1;ACOC_0000127701-mRNA-1;ACOC_0000127801-mRNA-1;MSTRG.1202.1;MSTRG.1202.3;MSTRG.1202.4
MSTRG.12037	ACOC_0001233301;ACOC_0001233401	ACOC_0001233301-mRNA-1;ACOC_0001233401-mRNA-1;MSTRG.12037.1;MSTRG.12037.2;MSTRG.12037.3
MSTRG.12041	ACOC_0001233701;ACOC_0001233801	ACOC_0001233701-mRNA-1;ACOC_0001233801-mRNA-1;MSTRG.12041.2
MSTRG.12084	ACOC_0001238001;ACOC_0001238101	ACOC_0001238001-mRNA-1;ACOC_0001238101-mRNA-1;MSTRG.12084.1
MSTRG.121	ACOC_0000013801;ACOC_0000013901	ACOC_0000013801-mRNA-1;ACOC_0000013901-mRNA-1;MSTRG.121.1;MSTRG.121.2
MSTRG.1210	ACOC_0000128501;ACOC_0000128601	ACOC_0000128501-mRNA-1;ACOC_0000128601-mRNA-1;MSTRG.1210.1;MSTRG.1210.2;MSTRG.1210.3;MSTRG.1210.5;MSTRG.1210.6
MSTRG.12103	ACOC_0001239801;ACOC_0001239901	ACOC_0001239801-mRNA-1;ACOC_0001239901-mRNA-1;MSTRG.12103.2
MSTRG.12109	ACOC_0001240301;ACOC_0001240401	ACOC_0001240301-mRNA-1;ACOC_0001240401-mRNA-1;MSTRG.12109.1;MSTRG.12109.2
MSTRG.12122	ACOC_0001241601;ACOC_0001241701;ACOC_0001241901	ACOC_0001241601-mRNA-1;ACOC_0001241701-mRNA-1;ACOC_0001241901-mRNA-1;MSTRG.12122.1
MSTRG.12124	ACOC_0001242001;ACOC_0001242101	ACOC_0001242001-mRNA-1;ACOC_0001242101-mRNA-1;MSTRG.12124.1
MSTRG.1215	ACOC_0000129001;ACOC_0000129101	ACOC_0000129001-mRNA-1;ACOC_0000129101-mRNA-1;MSTRG.1215.1
MSTRG.12179	ACOC_0001247301;ACOC_0001247401	ACOC_0001247301-mRNA-1;ACOC_0001247401-mRNA-1;MSTRG.12179.1
MSTRG.12219	ACOC_0001251001;ACOC_0001251101	ACOC_0001251001-mRNA-1;ACOC_0001251101-mRNA-1;MSTRG.12219.1
MSTRG.12263	ACOC_0001255501;ACOC_0001255601	ACOC_0001255501-mRNA-1;ACOC_0001255601-mRNA-1;MSTRG.12263.1
MSTRG.1229	ACOC_0000130201;ACOC_0000130301	ACOC_0000130201-mRNA-1;ACOC_0000130301-mRNA-1;MSTRG.1229.1;MSTRG.1229.2
MSTRG.12315	ACOC_0001260601;ACOC_0001260701	ACOC_0001260601-mRNA-1;ACOC_0001260701-mRNA-1;MSTRG.12315.1;MSTRG.12315.4
MSTRG.12316	ACOC_0001260801;ACOC_0001260901	ACOC_0001260801-mRNA-1;ACOC_0001260901-mRNA-1;MSTRG.12316.2
MSTRG.12338	ACOC_0001262701;ACOC_0001262801	ACOC_0001262701-mRNA-1;ACOC_0001262801-mRNA-1;MSTRG.12338.1;MSTRG.12338.4
MSTRG.12355	ACOC_0001263901;ACOC_0001264001	ACOC_0001263901-mRNA-1;ACOC_0001264001-mRNA-1;MSTRG.12355.1
MSTRG.1237	ACOC_0000131101;ACOC_0000131201	ACOC_0000131101-mRNA-1;ACOC_0000131201-mRNA-1;MSTRG.1237.2
MSTRG.12375	ACOC_0001266401;ACOC_0001266501	ACOC_0001266401-mRNA-1;ACOC_0001266501-mRNA-1;MSTRG.12375.1;MSTRG.12375.2
MSTRG.12378	ACOC_0001266901;ACOC_0001267001	ACOC_0001266901-mRNA-1;ACOC_0001267001-mRNA-1;MSTRG.12378.1
MSTRG.12394	ACOC_0001268501;ACOC_0001268601	ACOC_0001268501-mRNA-1;ACOC_0001268601-mRNA-1;MSTRG.12394.1;MSTRG.12394.2
MSTRG.12406	ACOC_0001269501;ACOC_0001269601	ACOC_0001269501-mRNA-1;ACOC_0001269601-mRNA-1;MSTRG.12406.1
MSTRG.12423	ACOC_0001271501;ACOC_0001271601	ACOC_0001271501-mRNA-1;ACOC_0001271601-mRNA-1;MSTRG.12423.1
MSTRG.12438	ACOC_0001273001;ACOC_0001273101	ACOC_0001273001-mRNA-1;ACOC_0001273101-mRNA-1;MSTRG.12438.1
MSTRG.12447	ACOC_0001274001;ACOC_0001274201	ACOC_0001274001-mRNA-1;ACOC_0001274201-mRNA-1;MSTRG.12447.1;MSTRG.12447.2
MSTRG.12469	ACOC_0001276101;ACOC_0001276201	ACOC_0001276101-mRNA-1;ACOC_0001276201-mRNA-1;MSTRG.12469.1;MSTRG.12469.4
MSTRG.1247	ACOC_0000132001;ACOC_0000132101;ACOC_0000132201;ACOC_0000132301	ACOC_0000132001-mRNA-1;ACOC_0000132101-mRNA-1;ACOC_0000132201-mRNA-1;ACOC_0000132301-mRNA-1;MSTRG.1247.1;MSTRG.1247.2
MSTRG.1249	ACOC_0000132401;ACOC_0000132501	ACOC_0000132401-mRNA-1;ACOC_0000132501-mRNA-1;MSTRG.1249.1
MSTRG.12511	ACOC_0001279801;ACOC_0001279901	ACOC_0001279801-mRNA-1;ACOC_0001279901-mRNA-1;MSTRG.12511.1
MSTRG.12515	ACOC_0001280301;ACOC_0001280401	ACOC_0001280301-mRNA-1;ACOC_0001280401-mRNA-1;MSTRG.12515.1
MSTRG.1256	ACOC_0000133201;ACOC_0000133301	ACOC_0000133201-mRNA-1;ACOC_0000133301-mRNA-1;MSTRG.1256.1
MSTRG.12577	ACOC_0001286301;ACOC_0001286501	ACOC_0001286301-mRNA-1;ACOC_0001286501-mRNA-1;MSTRG.12577.1;MSTRG.12577.2;MSTRG.12577.4
MSTRG.12589	ACOC_0001287601;ACOC_0001287701	ACOC_0001287601-mRNA-1;ACOC_0001287701-mRNA-1;MSTRG.12589.1
MSTRG.1259	ACOC_0000133501;ACOC_0000133601	ACOC_0000133501-mRNA-1;ACOC_0000133601-mRNA-1;MSTRG.1259.1;MSTRG.1259.3
MSTRG.1261	ACOC_0000133801;ACOC_0000133901	ACOC_0000133801-mRNA-1;ACOC_0000133901-mRNA-1;MSTRG.1261.1;MSTRG.1261.2
MSTRG.12640	ACOC_0001291901;ACOC_0001292001	ACOC_0001291901-mRNA-1;ACOC_0001292001-mRNA-1;MSTRG.12640.1
MSTRG.12645	ACOC_0001292301;ACOC_0001292401	ACOC_0001292301-mRNA-1;ACOC_0001292401-mRNA-1;MSTRG.12645.1;MSTRG.12645.2
MSTRG.12656	ACOC_0001293701;ACOC_0001293801	ACOC_0001293701-mRNA-1;ACOC_0001293801-mRNA-1;MSTRG.12656.1;MSTRG.12656.2
MSTRG.12658	ACOC_0001294001;ACOC_0001294101;ACOC_0001294201	ACOC_0001294001-mRNA-1;ACOC_0001294101-mRNA-1;ACOC_0001294201-mRNA-1;MSTRG.12658.1
MSTRG.12676	ACOC_0001295901;ACOC_0001296001	ACOC_0001295901-mRNA-1;ACOC_0001296001-mRNA-1;MSTRG.12676.1;MSTRG.12676.2
MSTRG.12693	ACOC_0001297701;ACOC_0001297801	ACOC_0001297701-mRNA-1;ACOC_0001297801-mRNA-1;MSTRG.12693.2
MSTRG.12702	ACOC_0001298601;ACOC_0001298701	ACOC_0001298601-mRNA-1;ACOC_0001298701-mRNA-1;MSTRG.12702.1
MSTRG.1277	ACOC_0000135701;ACOC_0000135801	ACOC_0000135701-mRNA-1;ACOC_0000135801-mRNA-1;MSTRG.1277.1
MSTRG.12786	ACOC_0001306601;ACOC_0001306701	ACOC_0001306601-mRNA-1;ACOC_0001306701-mRNA-1;MSTRG.12786.1;MSTRG.12786.2
MSTRG.1279	ACOC_0000135901;ACOC_0000136001;ACOC_0000136101	ACOC_0000135901-mRNA-1;ACOC_0000136001-mRNA-1;ACOC_0000136101-mRNA-1;MSTRG.1279.1;MSTRG.1279.4
MSTRG.12822	ACOC_0001310901;ACOC_0001311101	ACOC_0001310901-mRNA-1;ACOC_0001311101-mRNA-1;MSTRG.12822.2
MSTRG.1283	ACOC_0000136401;ACOC_0000136501	ACOC_0000136401-mRNA-1;ACOC_0000136501-mRNA-1;MSTRG.1283.1;MSTRG.1283.2
MSTRG.12859	ACOC_0001314601;ACOC_0001314701	ACOC_0001314601-mRNA-1;ACOC_0001314701-mRNA-1;MSTRG.12859.1
MSTRG.1307	ACOC_0000139101;ACOC_0000139301	ACOC_0000139101-mRNA-1;ACOC_0000139301-mRNA-1;MSTRG.1307.2
MSTRG.1339	ACOC_0000142101;ACOC_0000142301	ACOC_0000142101-mRNA-1;ACOC_0000142301-mRNA-1;MSTRG.1339.1;MSTRG.1339.2
MSTRG.1352	ACOC_0000143301;ACOC_0000143401	ACOC_0000143301-mRNA-1;ACOC_0000143401-mRNA-1;MSTRG.1352.2
MSTRG.1367	ACOC_0000144901;ACOC_0000145001	ACOC_0000144901-mRNA-1;ACOC_0000145001-mRNA-1;MSTRG.1367.2
MSTRG.1371	ACOC_0000145401;ACOC_0000145501	ACOC_0000145401-mRNA-1;ACOC_0000145501-mRNA-1;MSTRG.1371.1
MSTRG.1378	ACOC_0000146101;ACOC_0000146201	ACOC_0000146101-mRNA-1;ACOC_0000146201-mRNA-1;MSTRG.1378.1
MSTRG.141	ACOC_0000015901;ACOC_0000016001	ACOC_0000015901-mRNA-1;ACOC_0000016001-mRNA-1;MSTRG.141.1;MSTRG.141.2;MSTRG.141.3
MSTRG.1411	ACOC_0000149501;ACOC_0000149601	ACOC_0000149501-mRNA-1;ACOC_0000149601-mRNA-1;MSTRG.1411.1
MSTRG.145	ACOC_0000016501;ACOC_0000016701	ACOC_0000016501-mRNA-1;ACOC_0000016701-mRNA-1;MSTRG.145.1
MSTRG.1472	ACOC_0000155401;ACOC_0000155501	ACOC_0000155401-mRNA-1;ACOC_0000155501-mRNA-1;MSTRG.1472.2
MSTRG.1478	ACOC_0000156301;ACOC_0000156401	ACOC_0000156301-mRNA-1;ACOC_0000156401-mRNA-1;MSTRG.1478.1
MSTRG.1484	ACOC_0000156901;ACOC_0000157001;ACOC_0000157101	ACOC_0000156901-mRNA-1;ACOC_0000157001-mRNA-1;ACOC_0000157101-mRNA-1;MSTRG.1484.1;MSTRG.1484.2;MSTRG.1484.3
MSTRG.1491	ACOC_0000157901;ACOC_0000158001	ACOC_0000157901-mRNA-1;ACOC_0000158001-mRNA-1;MSTRG.1491.1
MSTRG.1492	ACOC_0000158101;ACOC_0000158201	ACOC_0000158101-mRNA-1;ACOC_0000158201-mRNA-1;MSTRG.1492.1;MSTRG.1492.2
MSTRG.1500	ACOC_0000159001;ACOC_0000159101	ACOC_0000159001-mRNA-1;ACOC_0000159101-mRNA-1;MSTRG.1500.1
MSTRG.1534	ACOC_0000162101;ACOC_0000162201	ACOC_0000162101-mRNA-1;ACOC_0000162201-mRNA-1;MSTRG.1534.1;MSTRG.1534.4;MSTRG.1534.5;MSTRG.1534.6;MSTRG.1534.7;MSTRG.1534.8
MSTRG.1539	ACOC_0000162601;ACOC_0000162701	ACOC_0000162601-mRNA-1;ACOC_0000162701-mRNA-1;MSTRG.1539.1
MSTRG.1541	ACOC_0000163001;ACOC_0000163101	ACOC_0000163001-mRNA-1;ACOC_0000163101-mRNA-1;MSTRG.1541.1
MSTRG.1543	ACOC_0000163301;ACOC_0000163401	ACOC_0000163301-mRNA-1;ACOC_0000163401-mRNA-1;MSTRG.1543.1;MSTRG.1543.2;MSTRG.1543.3
MSTRG.157	ACOC_0000017301;ACOC_0000017401	ACOC_0000017301-mRNA-1;ACOC_0000017401-mRNA-1;MSTRG.157.1
MSTRG.158	ACOC_0000017501;ACOC_0000017601	ACOC_0000017501-mRNA-1;ACOC_0000017601-mRNA-1;MSTRG.158.1
MSTRG.1581	ACOC_0000167301;ACOC_0000167401	ACOC_0000167301-mRNA-1;ACOC_0000167401-mRNA-1;MSTRG.1581.2
MSTRG.1584	ACOC_0000167601;ACOC_0000167701	ACOC_0000167601-mRNA-1;ACOC_0000167701-mRNA-1;MSTRG.1584.1
MSTRG.1589	ACOC_0000168201;ACOC_0000168301	ACOC_0000168201-mRNA-1;ACOC_0000168301-mRNA-1;MSTRG.1589.1
MSTRG.162	ACOC_0000018001;ACOC_0000018101	ACOC_0000018001-mRNA-1;ACOC_0000018101-mRNA-1;MSTRG.162.1;MSTRG.162.2
MSTRG.1634	ACOC_0000172901;ACOC_0000173001	ACOC_0000172901-mRNA-1;ACOC_0000173001-mRNA-1;MSTRG.1634.1;MSTRG.1634.2
MSTRG.1640	ACOC_0000173301;ACOC_0000173401;ACOC_0000173501	ACOC_0000173301-mRNA-1;ACOC_0000173401-mRNA-1;ACOC_0000173501-mRNA-1;MSTRG.1640.1
MSTRG.165	ACOC_0000018401;ACOC_0000018501	ACOC_0000018401-mRNA-1;ACOC_0000018501-mRNA-1;MSTRG.165.1
MSTRG.1650	ACOC_0000174301;ACOC_0000174401	ACOC_0000174301-mRNA-1;ACOC_0000174401-mRNA-1;MSTRG.1650.2
MSTRG.1652	ACOC_0000174601;ACOC_0000174701	ACOC_0000174601-mRNA-1;ACOC_0000174701-mRNA-1;MSTRG.1652.1;MSTRG.1652.2;MSTRG.1652.4;MSTRG.1652.5
MSTRG.1694	ACOC_0000178201;ACOC_0000178301;ACOC_0000178401	ACOC_0000178201-mRNA-1;ACOC_0000178301-mRNA-1;ACOC_0000178401-mRNA-1;MSTRG.1694.1
MSTRG.1710	ACOC_0000180001;ACOC_0000180101	ACOC_0000180001-mRNA-1;ACOC_0000180101-mRNA-1;MSTRG.1710.1
MSTRG.173	ACOC_0000019201;ACOC_0000019301	ACOC_0000019201-mRNA-1;ACOC_0000019301-mRNA-1;MSTRG.173.1;MSTRG.173.2;MSTRG.173.4
MSTRG.1734	ACOC_0000182101;ACOC_0000182301	ACOC_0000182101-mRNA-1;ACOC_0000182301-mRNA-1;MSTRG.1734.1;MSTRG.1734.2
MSTRG.1770	ACOC_0000185601;ACOC_0000185701	ACOC_0000185601-mRNA-1;ACOC_0000185701-mRNA-1;MSTRG.1770.1;MSTRG.1770.2
MSTRG.1777	ACOC_0000186301;ACOC_0000186501;ACOC_0000186601;ACOC_0000186701	ACOC_0000186301-mRNA-1;ACOC_0000186501-mRNA-1;ACOC_0000186601-mRNA-1;ACOC_0000186701-mRNA-1;MSTRG.1777.1
MSTRG.1780	ACOC_0000186901;ACOC_0000187001	ACOC_0000186901-mRNA-1;ACOC_0000187001-mRNA-1;MSTRG.1780.1;MSTRG.1780.3;MSTRG.1780.4;MSTRG.1780.6
MSTRG.1788	ACOC_0000187801;ACOC_0000187901	ACOC_0000187801-mRNA-1;ACOC_0000187901-mRNA-1;MSTRG.1788.2
MSTRG.1794	ACOC_0000188601;ACOC_0000188701;ACOC_0000188801	ACOC_0000188601-mRNA-1;ACOC_0000188701-mRNA-1;ACOC_0000188801-mRNA-1;MSTRG.1794.1
MSTRG.1811	ACOC_0000190601;ACOC_0000190701	ACOC_0000190601-mRNA-1;ACOC_0000190701-mRNA-1;MSTRG.1811.1;MSTRG.1811.2
MSTRG.1835	ACOC_0000192901;ACOC_0000193001	ACOC_0000192901-mRNA-1;ACOC_0000193001-mRNA-1;MSTRG.1835.1;MSTRG.1835.3
MSTRG.184	ACOC_0000020501;ACOC_0000020601	ACOC_0000020501-mRNA-1;ACOC_0000020601-mRNA-1;MSTRG.184.1
MSTRG.1840	ACOC_0000193401;ACOC_0000193501;ACOC_0000193601	ACOC_0000193401-mRNA-1;ACOC_0000193501-mRNA-1;ACOC_0000193601-mRNA-1;MSTRG.1840.1
MSTRG.1845	ACOC_0000194101;ACOC_0000194201	ACOC_0000194101-mRNA-1;ACOC_0000194201-mRNA-1;MSTRG.1845.1
MSTRG.1865	ACOC_0000196201;ACOC_0000196301	ACOC_0000196201-mRNA-1;ACOC_0000196301-mRNA-1;MSTRG.1865.1
MSTRG.1879	ACOC_0000197801;ACOC_0000197901	ACOC_0000197801-mRNA-1;ACOC_0000197901-mRNA-1;MSTRG.1879.1;MSTRG.1879.2
MSTRG.188	ACOC_0000021001;ACOC_0000021101	ACOC_0000021001-mRNA-1;ACOC_0000021101-mRNA-1;MSTRG.188.1
MSTRG.190	ACOC_0000021301;ACOC_0000021401	ACOC_0000021301-mRNA-1;ACOC_0000021401-mRNA-1;MSTRG.190.1;MSTRG.190.3
MSTRG.1909	ACOC_0000200401;ACOC_0000200501	ACOC_0000200401-mRNA-1;ACOC_0000200501-mRNA-1;MSTRG.1909.1
MSTRG.1911	ACOC_0000200901;ACOC_0000201001	ACOC_0000200901-mRNA-1;ACOC_0000201001-mRNA-1;MSTRG.1911.1
MSTRG.1914	ACOC_0000201201;ACOC_0000201301	ACOC_0000201201-mRNA-1;ACOC_0000201301-mRNA-1;MSTRG.1914.1
MSTRG.1926	ACOC_0000202401;ACOC_0000202501	ACOC_0000202401-mRNA-1;ACOC_0000202501-mRNA-1;MSTRG.1926.1
MSTRG.1941	ACOC_0000203901;ACOC_0000204001;ACOC_0000204101	ACOC_0000203901-mRNA-1;ACOC_0000204001-mRNA-1;ACOC_0000204101-mRNA-1;MSTRG.1941.1
MSTRG.1967	ACOC_0000206901;ACOC_0000207101	ACOC_0000206901-mRNA-1;ACOC_0000207101-mRNA-1;MSTRG.1967.1;MSTRG.1967.3
MSTRG.2	ACOC_0000000101;ACOC_0000000301	ACOC_0000000101-mRNA-1;ACOC_0000000301-mRNA-1;MSTRG.2.1
MSTRG.2019	ACOC_0000212001;ACOC_0000212101	ACOC_0000212001-mRNA-1;ACOC_0000212101-mRNA-1;MSTRG.2019.1;MSTRG.2019.2
MSTRG.2033	ACOC_0000213101;ACOC_0000213201	ACOC_0000213101-mRNA-1;ACOC_0000213201-mRNA-1;MSTRG.2033.1;MSTRG.2033.3
MSTRG.2040	ACOC_0000213701;ACOC_0000213801	ACOC_0000213701-mRNA-1;ACOC_0000213801-mRNA-1;MSTRG.2040.1;MSTRG.2040.3
MSTRG.2046	ACOC_0000214301;ACOC_0000214401	ACOC_0000214301-mRNA-1;ACOC_0000214401-mRNA-1;MSTRG.2046.1
MSTRG.2054	ACOC_0000215501;ACOC_0000215601	ACOC_0000215501-mRNA-1;ACOC_0000215601-mRNA-1;MSTRG.2054.1;MSTRG.2054.2;MSTRG.2054.5;MSTRG.2054.6
MSTRG.2057	ACOC_0000215801;ACOC_0000215901;ACOC_0000216001	ACOC_0000215801-mRNA-1;ACOC_0000215901-mRNA-1;ACOC_0000216001-mRNA-1;MSTRG.2057.1;MSTRG.2057.2
MSTRG.2065	ACOC_0000216801;ACOC_0000216901;ACOC_0000217001	ACOC_0000216801-mRNA-1;ACOC_0000216901-mRNA-1;ACOC_0000217001-mRNA-1;MSTRG.2065.2
MSTRG.2076	ACOC_0000218001;ACOC_0000218101	ACOC_0000218001-mRNA-1;ACOC_0000218101-mRNA-1;MSTRG.2076.1;MSTRG.2076.2
MSTRG.208	ACOC_0000022901;ACOC_0000023001	ACOC_0000022901-mRNA-1;ACOC_0000023001-mRNA-1;MSTRG.208.1;MSTRG.208.4
MSTRG.2093	ACOC_0000220101;ACOC_0000220201;ACOC_0000220301	ACOC_0000220101-mRNA-1;ACOC_0000220201-mRNA-1;ACOC_0000220301-mRNA-1;MSTRG.2093.2;MSTRG.2093.4;MSTRG.2093.6
MSTRG.2103	ACOC_0000221401;ACOC_0000221501	ACOC_0000221401-mRNA-1;ACOC_0000221501-mRNA-1;MSTRG.2103.1;MSTRG.2103.3
MSTRG.2112	ACOC_0000222301;ACOC_0000222401	ACOC_0000222301-mRNA-1;ACOC_0000222401-mRNA-1;MSTRG.2112.1
MSTRG.2121	ACOC_0000223101;ACOC_0000223201	ACOC_0000223101-mRNA-1;ACOC_0000223201-mRNA-1;MSTRG.2121.1
MSTRG.2157	ACOC_0000226701;ACOC_0000226801	ACOC_0000226701-mRNA-1;ACOC_0000226801-mRNA-1;MSTRG.2157.1
MSTRG.2186	ACOC_0000229601;ACOC_0000229701	ACOC_0000229601-mRNA-1;ACOC_0000229701-mRNA-1;MSTRG.2186.2;MSTRG.2186.3
MSTRG.219	ACOC_0000023801;ACOC_0000023901	ACOC_0000023801-mRNA-1;ACOC_0000023901-mRNA-1;MSTRG.219.1;MSTRG.219.2
MSTRG.2194	ACOC_0000230401;ACOC_0000230501	ACOC_0000230401-mRNA-1;ACOC_0000230501-mRNA-1;MSTRG.2194.1
MSTRG.2207	ACOC_0000231301;ACOC_0000231501	ACOC_0000231301-mRNA-1;ACOC_0000231501-mRNA-1;MSTRG.2207.2;MSTRG.2207.3
MSTRG.2242	ACOC_0000234601;ACOC_0000234701;ACOC_0000234801	ACOC_0000234601-mRNA-1;ACOC_0000234701-mRNA-1;ACOC_0000234801-mRNA-1;MSTRG.2242.1;MSTRG.2242.2;MSTRG.2242.6
MSTRG.2251	ACOC_0000235801;ACOC_0000235901	ACOC_0000235801-mRNA-1;ACOC_0000235901-mRNA-1;MSTRG.2251.1;MSTRG.2251.3
MSTRG.2261	ACOC_0000236801;ACOC_0000236901	ACOC_0000236801-mRNA-1;ACOC_0000236901-mRNA-1;MSTRG.2261.1
MSTRG.2267	ACOC_0000237401;ACOC_0000237501	ACOC_0000237401-mRNA-1;ACOC_0000237501-mRNA-1;MSTRG.2267.1;MSTRG.2267.2;MSTRG.2267.4
MSTRG.2294	ACOC_0000240301;ACOC_0000240401	ACOC_0000240301-mRNA-1;ACOC_0000240401-mRNA-1;MSTRG.2294.1;MSTRG.2294.2
MSTRG.2297	ACOC_0000240701;ACOC_0000240801	ACOC_0000240701-mRNA-1;ACOC_0000240801-mRNA-1;MSTRG.2297.1
MSTRG.23	ACOC_0000002301;ACOC_0000002401	ACOC_0000002301-mRNA-1;ACOC_0000002401-mRNA-1;MSTRG.23.1
MSTRG.234	ACOC_0000025301;ACOC_0000025401	ACOC_0000025301-mRNA-1;ACOC_0000025401-mRNA-1;MSTRG.234.1
MSTRG.2344	ACOC_0000245101;ACOC_0000245201	ACOC_0000245101-mRNA-1;ACOC_0000245201-mRNA-1;MSTRG.2344.1;MSTRG.2344.2
MSTRG.236	ACOC_0000025601;ACOC_0000025701	ACOC_0000025601-mRNA-1;ACOC_0000025701-mRNA-1;MSTRG.236.1;MSTRG.236.2
MSTRG.2368	ACOC_0000247801;ACOC_0000247901	ACOC_0000247801-mRNA-1;ACOC_0000247901-mRNA-1;MSTRG.2368.1
MSTRG.237	ACOC_0000025801;ACOC_0000025901	ACOC_0000025801-mRNA-1;ACOC_0000025901-mRNA-1;MSTRG.237.1
MSTRG.24	ACOC_0000002501;ACOC_0000002601	ACOC_0000002501-mRNA-1;ACOC_0000002601-mRNA-1;MSTRG.24.1
MSTRG.2403	ACOC_0000251201;ACOC_0000251301	ACOC_0000251201-mRNA-1;ACOC_0000251301-mRNA-1;MSTRG.2403.1;MSTRG.2403.2
MSTRG.2406	ACOC_0000251701;ACOC_0000251801;ACOC_0000251901	ACOC_0000251701-mRNA-1;ACOC_0000251801-mRNA-1;ACOC_0000251901-mRNA-1;MSTRG.2406.1;MSTRG.2406.2
MSTRG.2414	ACOC_0000252601;ACOC_0000252701	ACOC_0000252601-mRNA-1;ACOC_0000252701-mRNA-1;MSTRG.2414.1;MSTRG.2414.2
MSTRG.2417	ACOC_0000253001;ACOC_0000253101	ACOC_0000253001-mRNA-1;ACOC_0000253101-mRNA-1;MSTRG.2417.2
MSTRG.2425	ACOC_0000253801;ACOC_0000253901;ACOC_0000254001	ACOC_0000253801-mRNA-1;ACOC_0000253901-mRNA-1;ACOC_0000254001-mRNA-1;MSTRG.2425.1;MSTRG.2425.5
MSTRG.2428	ACOC_0000254301;ACOC_0000254401	ACOC_0000254301-mRNA-1;ACOC_0000254401-mRNA-1;MSTRG.2428.1;MSTRG.2428.3
MSTRG.2438	ACOC_0000255001;ACOC_0000255101;ACOC_0000255201	ACOC_0000255001-mRNA-1;ACOC_0000255101-mRNA-1;ACOC_0000255201-mRNA-1;MSTRG.2438.1
MSTRG.2447	ACOC_0000256101;ACOC_0000256201	ACOC_0000256101-mRNA-1;ACOC_0000256201-mRNA-1;MSTRG.2447.1
MSTRG.2466	ACOC_0000257901;ACOC_0000258001	ACOC_0000257901-mRNA-1;ACOC_0000258001-mRNA-1;MSTRG.2466.1;MSTRG.2466.2
MSTRG.2483	ACOC_0000259201;ACOC_0000259301	ACOC_0000259201-mRNA-1;ACOC_0000259301-mRNA-1;MSTRG.2483.1;MSTRG.2483.3;MSTRG.2483.5
MSTRG.2493	ACOC_0000260101;ACOC_0000260201	ACOC_0000260101-mRNA-1;ACOC_0000260201-mRNA-1;MSTRG.2493.1;MSTRG.2493.2
MSTRG.2500	ACOC_0000260901;ACOC_0000261001	ACOC_0000260901-mRNA-1;ACOC_0000261001-mRNA-1;MSTRG.2500.1
MSTRG.2501	ACOC_0000261101;ACOC_0000261201	ACOC_0000261101-mRNA-1;ACOC_0000261201-mRNA-1;MSTRG.2501.1
MSTRG.2503	ACOC_0000261401;ACOC_0000261501	ACOC_0000261401-mRNA-1;ACOC_0000261501-mRNA-1;MSTRG.2503.2
MSTRG.2507	ACOC_0000261901;ACOC_0000262001	ACOC_0000261901-mRNA-1;ACOC_0000262001-mRNA-1;MSTRG.2507.1
MSTRG.2511	ACOC_0000262401;ACOC_0000262501	ACOC_0000262401-mRNA-1;ACOC_0000262501-mRNA-1;MSTRG.2511.1
MSTRG.2535	ACOC_0000264601;ACOC_0000264701	ACOC_0000264601-mRNA-1;ACOC_0000264701-mRNA-1;MSTRG.2535.1
MSTRG.2538	ACOC_0000265001;ACOC_0000265101	ACOC_0000265001-mRNA-1;ACOC_0000265101-mRNA-1;MSTRG.2538.1
MSTRG.255	ACOC_0000027601;ACOC_0000027701	ACOC_0000027601-mRNA-1;ACOC_0000027701-mRNA-1;MSTRG.255.1
MSTRG.2550	ACOC_0000266001;ACOC_0000266101;ACOC_0000266201	ACOC_0000266001-mRNA-1;ACOC_0000266101-mRNA-1;ACOC_0000266201-mRNA-1;MSTRG.2550.2
MSTRG.2552	ACOC_0000266401;ACOC_0000266501	ACOC_0000266401-mRNA-1;ACOC_0000266501-mRNA-1;MSTRG.2552.1;MSTRG.2552.2
MSTRG.2558	ACOC_0000266801;ACOC_0000266901	ACOC_0000266801-mRNA-1;ACOC_0000266901-mRNA-1;MSTRG.2558.1;MSTRG.2558.2;MSTRG.2558.3
MSTRG.2563	ACOC_0000267301;ACOC_0000267401	ACOC_0000267301-mRNA-1;ACOC_0000267401-mRNA-1;MSTRG.2563.1
MSTRG.258	ACOC_0000028001;ACOC_0000028201	ACOC_0000028001-mRNA-1;ACOC_0000028201-mRNA-1;MSTRG.258.1
MSTRG.2597	ACOC_0000270401;ACOC_0000270501	ACOC_0000270401-mRNA-1;ACOC_0000270501-mRNA-1;MSTRG.2597.2
MSTRG.260	ACOC_0000028301;ACOC_0000028401	ACOC_0000028301-mRNA-1;ACOC_0000028401-mRNA-1;MSTRG.260.1;MSTRG.260.2;MSTRG.260.5
MSTRG.2611	ACOC_0000271701;ACOC_0000271801	ACOC_0000271701-mRNA-1;ACOC_0000271801-mRNA-1;MSTRG.2611.1
MSTRG.2619	ACOC_0000272501;ACOC_0000272601	ACOC_0000272501-mRNA-1;ACOC_0000272601-mRNA-1;MSTRG.2619.1
MSTRG.2623	ACOC_0000273001;ACOC_0000273101;ACOC_0000273201	ACOC_0000273001-mRNA-1;ACOC_0000273101-mRNA-1;ACOC_0000273201-mRNA-1;MSTRG.2623.1
MSTRG.2633	ACOC_0000274001;ACOC_0000274101	ACOC_0000274001-mRNA-1;ACOC_0000274101-mRNA-1;MSTRG.2633.1;MSTRG.2633.4
MSTRG.2671	ACOC_0000277201;ACOC_0000277301	ACOC_0000277201-mRNA-1;ACOC_0000277301-mRNA-1;MSTRG.2671.1
MSTRG.2687	ACOC_0000278501;ACOC_0000278601	ACOC_0000278501-mRNA-1;ACOC_0000278601-mRNA-1;MSTRG.2687.1
MSTRG.2688	ACOC_0000278701;ACOC_0000278801	ACOC_0000278701-mRNA-1;ACOC_0000278801-mRNA-1;MSTRG.2688.1
MSTRG.2692	ACOC_0000279201;ACOC_0000279301	ACOC_0000279201-mRNA-1;ACOC_0000279301-mRNA-1;MSTRG.2692.1;MSTRG.2692.2
MSTRG.2720	ACOC_0000281701;ACOC_0000281801	ACOC_0000281701-mRNA-1;ACOC_0000281801-mRNA-1;MSTRG.2720.1
MSTRG.2727	ACOC_0000282201;ACOC_0000282301	ACOC_0000282201-mRNA-1;ACOC_0000282301-mRNA-1;MSTRG.2727.1
MSTRG.2752	ACOC_0000284601;ACOC_0000284701	ACOC_0000284601-mRNA-1;ACOC_0000284701-mRNA-1;MSTRG.2752.1
MSTRG.2763	ACOC_0000285901;ACOC_0000286001	ACOC_0000285901-mRNA-1;ACOC_0000286001-mRNA-1;MSTRG.2763.1
MSTRG.277	ACOC_0000029601;ACOC_0000029701	ACOC_0000029601-mRNA-1;ACOC_0000029701-mRNA-1;MSTRG.277.1
MSTRG.2772	ACOC_0000286801;ACOC_0000286901	ACOC_0000286801-mRNA-1;ACOC_0000286901-mRNA-1;MSTRG.2772.1
MSTRG.2786	ACOC_0000288201;ACOC_0000288301	ACOC_0000288201-mRNA-1;ACOC_0000288301-mRNA-1;MSTRG.2786.1
MSTRG.280	ACOC_0000030001;ACOC_0000030101	ACOC_0000030001-mRNA-1;ACOC_0000030101-mRNA-1;MSTRG.280.2
MSTRG.2809	ACOC_0000290201;ACOC_0000290301	ACOC_0000290201-mRNA-1;ACOC_0000290301-mRNA-1;MSTRG.2809.1
MSTRG.2810	ACOC_0000290401;ACOC_0000290501	ACOC_0000290401-mRNA-1;ACOC_0000290501-mRNA-1;MSTRG.2810.1
MSTRG.2819	ACOC_0000291201;ACOC_0000291401	ACOC_0000291201-mRNA-1;ACOC_0000291401-mRNA-1;MSTRG.2819.1;MSTRG.2819.2
MSTRG.2835	ACOC_0000292401;ACOC_0000292501	ACOC_0000292401-mRNA-1;ACOC_0000292501-mRNA-1;MSTRG.2835.1
MSTRG.2863	ACOC_0000294701;ACOC_0000294801	ACOC_0000294701-mRNA-1;ACOC_0000294801-mRNA-1;MSTRG.2863.1;MSTRG.2863.2
MSTRG.2875	ACOC_0000295901;ACOC_0000296001;ACOC_0000296101	ACOC_0000295901-mRNA-1;ACOC_0000296001-mRNA-1;ACOC_0000296101-mRNA-1;MSTRG.2875.1
MSTRG.2881	ACOC_0000296701;ACOC_0000296801	ACOC_0000296701-mRNA-1;ACOC_0000296801-mRNA-1;MSTRG.2881.1
MSTRG.2900	ACOC_0000298601;ACOC_0000298701	ACOC_0000298601-mRNA-1;ACOC_0000298701-mRNA-1;MSTRG.2900.1
MSTRG.2904	ACOC_0000299101;ACOC_0000299201	ACOC_0000299101-mRNA-1;ACOC_0000299201-mRNA-1;MSTRG.2904.1;MSTRG.2904.2
MSTRG.2921	ACOC_0000300401;ACOC_0000300501	ACOC_0000300401-mRNA-1;ACOC_0000300501-mRNA-1;MSTRG.2921.1;MSTRG.2921.3
MSTRG.2926	ACOC_0000300801;ACOC_0000300901	ACOC_0000300801-mRNA-1;ACOC_0000300901-mRNA-1;MSTRG.2926.1
MSTRG.2928	ACOC_0000301001;ACOC_0000301101;ACOC_0000301201	ACOC_0000301001-mRNA-1;ACOC_0000301101-mRNA-1;ACOC_0000301201-mRNA-1;MSTRG.2928.1;MSTRG.2928.5
MSTRG.293	ACOC_0000031201;ACOC_0000031301	ACOC_0000031201-mRNA-1;ACOC_0000031301-mRNA-1;MSTRG.293.1;MSTRG.293.2
MSTRG.295	ACOC_0000031501;ACOC_0000031601	ACOC_0000031501-mRNA-1;ACOC_0000031601-mRNA-1;MSTRG.295.1;MSTRG.295.2
MSTRG.2977	ACOC_0000305301;ACOC_0000305401	ACOC_0000305301-mRNA-1;ACOC_0000305401-mRNA-1;MSTRG.2977.1
MSTRG.298	ACOC_0000031901;ACOC_0000032001	ACOC_0000031901-mRNA-1;ACOC_0000032001-mRNA-1;MSTRG.298.1;MSTRG.298.2
MSTRG.3003	ACOC_0000308201;ACOC_0000308301	ACOC_0000308201-mRNA-1;ACOC_0000308301-mRNA-1;MSTRG.3003.1
MSTRG.3027	ACOC_0000310401;ACOC_0000310501	ACOC_0000310401-mRNA-1;ACOC_0000310501-mRNA-1;MSTRG.3027.1;MSTRG.3027.3
MSTRG.3046	ACOC_0000312001;ACOC_0000312201	ACOC_0000312001-mRNA-1;ACOC_0000312201-mRNA-1;MSTRG.3046.2
MSTRG.305	ACOC_0000032401;ACOC_0000032501;ACOC_0000032701	ACOC_0000032401-mRNA-1;ACOC_0000032501-mRNA-1;ACOC_0000032701-mRNA-1;MSTRG.305.2;MSTRG.305.5
MSTRG.3097	ACOC_0000316201;ACOC_0000316301	ACOC_0000316201-mRNA-1;ACOC_0000316301-mRNA-1;MSTRG.3097.1;MSTRG.3097.3
MSTRG.312	ACOC_0000033301;ACOC_0000033401	ACOC_0000033301-mRNA-1;ACOC_0000033401-mRNA-1;MSTRG.312.1
MSTRG.3126	ACOC_0000318701;ACOC_0000318801	ACOC_0000318701-mRNA-1;ACOC_0000318801-mRNA-1;MSTRG.3126.1
MSTRG.3150	ACOC_0000320901;ACOC_0000321001	ACOC_0000320901-mRNA-1;ACOC_0000321001-mRNA-1;MSTRG.3150.1
MSTRG.3155	ACOC_0000321501;ACOC_0000321601	ACOC_0000321501-mRNA-1;ACOC_0000321601-mRNA-1;MSTRG.3155.2
MSTRG.316	ACOC_0000033801;ACOC_0000033901	ACOC_0000033801-mRNA-1;ACOC_0000033901-mRNA-1;MSTRG.316.1;MSTRG.316.4
MSTRG.3173	ACOC_0000322901;ACOC_0000323001	ACOC_0000322901-mRNA-1;ACOC_0000323001-mRNA-1;MSTRG.3173.2
MSTRG.3176	ACOC_0000323301;ACOC_0000323401	ACOC_0000323301-mRNA-1;ACOC_0000323401-mRNA-1;MSTRG.3176.2;MSTRG.3176.3
MSTRG.32	ACOC_0000003501;ACOC_0000003601	ACOC_0000003501-mRNA-1;ACOC_0000003601-mRNA-1;MSTRG.32.1
MSTRG.3207	ACOC_0000326001;ACOC_0000326101	ACOC_0000326001-mRNA-1;ACOC_0000326101-mRNA-1;MSTRG.3207.1
MSTRG.3233	ACOC_0000328001;ACOC_0000328201	ACOC_0000328001-mRNA-1;ACOC_0000328201-mRNA-1;MSTRG.3233.2
MSTRG.3237	ACOC_0000328601;ACOC_0000328701	ACOC_0000328601-mRNA-1;ACOC_0000328701-mRNA-1;MSTRG.3237.1
MSTRG.3243	ACOC_0000329101;ACOC_0000329201	ACOC_0000329101-mRNA-1;ACOC_0000329201-mRNA-1;MSTRG.3243.1;MSTRG.3243.2
MSTRG.3247	ACOC_0000329601;ACOC_0000329701	ACOC_0000329601-mRNA-1;ACOC_0000329701-mRNA-1;MSTRG.3247.1;MSTRG.3247.2
MSTRG.3255	ACOC_0000330401;ACOC_0000330501	ACOC_0000330401-mRNA-1;ACOC_0000330501-mRNA-1;MSTRG.3255.1;MSTRG.3255.2
MSTRG.3272	ACOC_0000332201;ACOC_0000332301	ACOC_0000332201-mRNA-1;ACOC_0000332301-mRNA-1;MSTRG.3272.1
MSTRG.3275	ACOC_0000332601;ACOC_0000332701	ACOC_0000332601-mRNA-1;ACOC_0000332701-mRNA-1;MSTRG.3275.1
MSTRG.3277	ACOC_0000332801;ACOC_0000332901	ACOC_0000332801-mRNA-1;ACOC_0000332901-mRNA-1;MSTRG.3277.1;MSTRG.3277.2
MSTRG.328	ACOC_0000034801;ACOC_0000034901	ACOC_0000034801-mRNA-1;ACOC_0000034901-mRNA-1;MSTRG.328.1;MSTRG.328.3
MSTRG.3295	ACOC_0000334701;ACOC_0000334801	ACOC_0000334701-mRNA-1;ACOC_0000334801-mRNA-1;MSTRG.3295.1
MSTRG.3296	ACOC_0000334901;ACOC_0000335101	ACOC_0000334901-mRNA-1;ACOC_0000335101-mRNA-1;MSTRG.3296.1;MSTRG.3296.2
MSTRG.33	ACOC_0000003701;ACOC_0000003801	ACOC_0000003701-mRNA-1;ACOC_0000003801-mRNA-1;MSTRG.33.1
MSTRG.3321	ACOC_0000337301;ACOC_0000337401	ACOC_0000337301-mRNA-1;ACOC_0000337401-mRNA-1;MSTRG.3321.1
MSTRG.3336	ACOC_0000338701;ACOC_0000338801	ACOC_0000338701-mRNA-1;ACOC_0000338801-mRNA-1;MSTRG.3336.1;MSTRG.3336.2
MSTRG.3428	ACOC_0000347501;ACOC_0000347601;ACOC_0000347701	ACOC_0000347501-mRNA-1;ACOC_0000347601-mRNA-1;ACOC_0000347701-mRNA-1;MSTRG.3428.1
MSTRG.343	ACOC_0000036001;ACOC_0000036101	ACOC_0000036001-mRNA-1;ACOC_0000036101-mRNA-1;MSTRG.343.2
MSTRG.346	ACOC_0000036401;ACOC_0000036501	ACOC_0000036401-mRNA-1;ACOC_0000036501-mRNA-1;MSTRG.346.1;MSTRG.346.4
MSTRG.3473	ACOC_0000351901;ACOC_0000352001	ACOC_0000351901-mRNA-1;ACOC_0000352001-mRNA-1;MSTRG.3473.2
MSTRG.3475	ACOC_0000352201;ACOC_0000352301	ACOC_0000352201-mRNA-1;ACOC_0000352301-mRNA-1;MSTRG.3475.1
MSTRG.3508	ACOC_0000356101;ACOC_0000356201	ACOC_0000356101-mRNA-1;ACOC_0000356201-mRNA-1;MSTRG.3508.1
MSTRG.3519	ACOC_0000357201;ACOC_0000357301	ACOC_0000357201-mRNA-1;ACOC_0000357301-mRNA-1;MSTRG.3519.1
MSTRG.3553	ACOC_0000360201;ACOC_0000360301	ACOC_0000360201-mRNA-1;ACOC_0000360301-mRNA-1;MSTRG.3553.1
MSTRG.3639	ACOC_0000367001;ACOC_0000367101	ACOC_0000367001-mRNA-1;ACOC_0000367101-mRNA-1;MSTRG.3639.1
MSTRG.366	ACOC_0000038201;ACOC_0000038301	ACOC_0000038201-mRNA-1;ACOC_0000038301-mRNA-1;MSTRG.366.1
MSTRG.3727	ACOC_0000374901;ACOC_0000375001	ACOC_0000374901-mRNA-1;ACOC_0000375001-mRNA-1;MSTRG.3727.1
MSTRG.382	ACOC_0000039901;ACOC_0000040001	ACOC_0000039901-mRNA-1;ACOC_0000040001-mRNA-1;MSTRG.382.2
MSTRG.3848	ACOC_0000385801;ACOC_0000385901	ACOC_0000385801-mRNA-1;ACOC_0000385901-mRNA-1;MSTRG.3848.1
MSTRG.394	ACOC_0000041601;ACOC_0000041701	ACOC_0000041601-mRNA-1;ACOC_0000041701-mRNA-1;MSTRG.394.1
MSTRG.395	ACOC_0000041801;ACOC_0000041901	ACOC_0000041801-mRNA-1;ACOC_0000041901-mRNA-1;MSTRG.395.2;MSTRG.395.3
MSTRG.3966	ACOC_0000395801;ACOC_0000395901	ACOC_0000395801-mRNA-1;ACOC_0000395901-mRNA-1;MSTRG.3966.1;MSTRG.3966.2
MSTRG.397	ACOC_0000042101;ACOC_0000042201	ACOC_0000042101-mRNA-1;ACOC_0000042201-mRNA-1;MSTRG.397.2;MSTRG.397.3
MSTRG.398	ACOC_0000042401;ACOC_0000042501	ACOC_0000042401-mRNA-1;ACOC_0000042501-mRNA-1;MSTRG.398.2;MSTRG.398.3
MSTRG.4	ACOC_0000000401;ACOC_0000000501	ACOC_0000000401-mRNA-1;ACOC_0000000501-mRNA-1;MSTRG.4.1
MSTRG.40	ACOC_0000004501;ACOC_0000004601;ACOC_0000004801	ACOC_0000004501-mRNA-1;ACOC_0000004601-mRNA-1;ACOC_0000004801-mRNA-1;MSTRG.40.1;MSTRG.40.2
MSTRG.420	ACOC_0000044601;ACOC_0000044701	ACOC_0000044601-mRNA-1;ACOC_0000044701-mRNA-1;MSTRG.420.1;MSTRG.420.3
MSTRG.421	ACOC_0000044901;ACOC_0000045001	ACOC_0000044901-mRNA-1;ACOC_0000045001-mRNA-1;MSTRG.421.1
MSTRG.4265	ACOC_0000422401;ACOC_0000422601	ACOC_0000422401-mRNA-1;ACOC_0000422601-mRNA-1;MSTRG.4265.1
MSTRG.4267	ACOC_0000422701;ACOC_0000422801;ACOC_0000422901;ACOC_0000423001;ACOC_0000423101;ACOC_0000423201;ACOC_0000423301	ACOC_0000422701-mRNA-1;ACOC_0000422801-mRNA-1;ACOC_0000422901-mRNA-1;ACOC_0000423001-mRNA-1;ACOC_0000423101-mRNA-1;ACOC_0000423201-mRNA-1;ACOC_0000423301-mRNA-1;MSTRG.4267.1;MSTRG.4267.2
MSTRG.4277	ACOC_0000424401;ACOC_0000424501	ACOC_0000424401-mRNA-1;ACOC_0000424501-mRNA-1;MSTRG.4277.1
MSTRG.429	ACOC_0000045701;ACOC_0000045801	ACOC_0000045701-mRNA-1;ACOC_0000045801-mRNA-1;MSTRG.429.1;MSTRG.429.2
MSTRG.431	ACOC_0000046001;ACOC_0000046101;ACOC_0000046201	ACOC_0000046001-mRNA-1;ACOC_0000046101-mRNA-1;ACOC_0000046201-mRNA-1;MSTRG.431.1
MSTRG.4317	ACOC_0000428301;ACOC_0000428401	ACOC_0000428301-mRNA-1;ACOC_0000428401-mRNA-1;MSTRG.4317.1;MSTRG.4317.4;MSTRG.4317.5
MSTRG.4320	ACOC_0000428701;ACOC_0000428801	ACOC_0000428701-mRNA-1;ACOC_0000428801-mRNA-1;MSTRG.4320.1
MSTRG.4331	ACOC_0000429901;ACOC_0000430001;ACOC_0000430101;ACOC_0000430201	ACOC_0000429901-mRNA-1;ACOC_0000430001-mRNA-1;ACOC_0000430101-mRNA-1;ACOC_0000430201-mRNA-1;MSTRG.4331.1;MSTRG.4331.2;MSTRG.4331.3
MSTRG.4347	ACOC_0000431901;ACOC_0000432001	ACOC_0000431901-mRNA-1;ACOC_0000432001-mRNA-1;MSTRG.4347.2
MSTRG.4350	ACOC_0000432301;ACOC_0000432401	ACOC_0000432301-mRNA-1;ACOC_0000432401-mRNA-1;MSTRG.4350.1
MSTRG.4372	ACOC_0000434901;ACOC_0000435001	ACOC_0000434901-mRNA-1;ACOC_0000435001-mRNA-1;MSTRG.4372.1;MSTRG.4372.2
MSTRG.4384	ACOC_0000436301;ACOC_0000436401;ACOC_0000436501	ACOC_0000436301-mRNA-1;ACOC_0000436401-mRNA-1;ACOC_0000436501-mRNA-1;MSTRG.4384.1;MSTRG.4384.2;MSTRG.4384.4
MSTRG.4388	ACOC_0000436901;ACOC_0000437001	ACOC_0000436901-mRNA-1;ACOC_0000437001-mRNA-1;MSTRG.4388.1;MSTRG.4388.2
MSTRG.4434	ACOC_0000441601;ACOC_0000441701	ACOC_0000441601-mRNA-1;ACOC_0000441701-mRNA-1;MSTRG.4434.1
MSTRG.444	ACOC_0000047601;ACOC_0000047701	ACOC_0000047601-mRNA-1;ACOC_0000047701-mRNA-1;MSTRG.444.1
MSTRG.4443	ACOC_0000442601;ACOC_0000442701	ACOC_0000442601-mRNA-1;ACOC_0000442701-mRNA-1;MSTRG.4443.1
MSTRG.4447	ACOC_0000443101;ACOC_0000443201	ACOC_0000443101-mRNA-1;ACOC_0000443201-mRNA-1;MSTRG.4447.1
MSTRG.4458	ACOC_0000444201;ACOC_0000444301;ACOC_0000444401	ACOC_0000444201-mRNA-1;ACOC_0000444301-mRNA-1;ACOC_0000444401-mRNA-1;MSTRG.4458.1;MSTRG.4458.3
MSTRG.4474	ACOC_0000446001;ACOC_0000446101	ACOC_0000446001-mRNA-1;ACOC_0000446101-mRNA-1;MSTRG.4474.1;MSTRG.4474.2
MSTRG.4486	ACOC_0000447201;ACOC_0000447301	ACOC_0000447201-mRNA-1;ACOC_0000447301-mRNA-1;MSTRG.4486.1
MSTRG.4514	ACOC_0000450101;ACOC_0000450301	ACOC_0000450101-mRNA-1;ACOC_0000450301-mRNA-1;MSTRG.4514.1;MSTRG.4514.2;MSTRG.4514.3
MSTRG.4532	ACOC_0000451801;ACOC_0000451901	ACOC_0000451801-mRNA-1;ACOC_0000451901-mRNA-1;MSTRG.4532.1
MSTRG.4538	ACOC_0000452601;ACOC_0000452701	ACOC_0000452601-mRNA-1;ACOC_0000452701-mRNA-1;MSTRG.4538.1;MSTRG.4538.2
MSTRG.4543	ACOC_0000453201;ACOC_0000453301;ACOC_0000453401	ACOC_0000453201-mRNA-1;ACOC_0000453301-mRNA-1;ACOC_0000453401-mRNA-1;MSTRG.4543.1;MSTRG.4543.2;MSTRG.4543.3
MSTRG.4560	ACOC_0000455301;ACOC_0000455401	ACOC_0000455301-mRNA-1;ACOC_0000455401-mRNA-1;MSTRG.4560.1
MSTRG.4566	ACOC_0000455901;ACOC_0000456001	ACOC_0000455901-mRNA-1;ACOC_0000456001-mRNA-1;MSTRG.4566.1
MSTRG.4589	ACOC_0000458201;ACOC_0000458401	ACOC_0000458201-mRNA-1;ACOC_0000458401-mRNA-1;MSTRG.4589.1
MSTRG.4609	ACOC_0000459901;ACOC_0000460001	ACOC_0000459901-mRNA-1;ACOC_0000460001-mRNA-1;MSTRG.4609.1;MSTRG.4609.2
MSTRG.4610	ACOC_0000460101;ACOC_0000460201	ACOC_0000460101-mRNA-1;ACOC_0000460201-mRNA-1;MSTRG.4610.1;MSTRG.4610.2
MSTRG.4621	ACOC_0000461101;ACOC_0000461201	ACOC_0000461101-mRNA-1;ACOC_0000461201-mRNA-1;MSTRG.4621.1
MSTRG.4622	ACOC_0000461301;ACOC_0000461401	ACOC_0000461301-mRNA-1;ACOC_0000461401-mRNA-1;MSTRG.4622.1;MSTRG.4622.4
MSTRG.463	ACOC_0000049701;ACOC_0000049801	ACOC_0000049701-mRNA-1;ACOC_0000049801-mRNA-1;MSTRG.463.1
MSTRG.4632	ACOC_0000462401;ACOC_0000462501;ACOC_0000462601	ACOC_0000462401-mRNA-1;ACOC_0000462501-mRNA-1;ACOC_0000462601-mRNA-1;MSTRG.4632.1
MSTRG.4645	ACOC_0000463801;ACOC_0000463901	ACOC_0000463801-mRNA-1;ACOC_0000463901-mRNA-1;MSTRG.4645.1
MSTRG.4653	ACOC_0000464701;ACOC_0000464901	ACOC_0000464701-mRNA-1;ACOC_0000464901-mRNA-1;MSTRG.4653.1;MSTRG.4653.2;MSTRG.4653.3
MSTRG.4673	ACOC_0000467101;ACOC_0000467201	ACOC_0000467101-mRNA-1;ACOC_0000467201-mRNA-1;MSTRG.4673.1
MSTRG.4685	ACOC_0000468301;ACOC_0000468401	ACOC_0000468301-mRNA-1;ACOC_0000468401-mRNA-1;MSTRG.4685.1
MSTRG.4698	ACOC_0000469501;ACOC_0000469601;ACOC_0000469701	ACOC_0000469501-mRNA-1;ACOC_0000469601-mRNA-1;ACOC_0000469701-mRNA-1;MSTRG.4698.1;MSTRG.4698.3;MSTRG.4698.4;MSTRG.4698.5
MSTRG.4699	ACOC_0000469801;ACOC_0000469901;ACOC_0000470101	ACOC_0000469801-mRNA-1;ACOC_0000469901-mRNA-1;ACOC_0000470101-mRNA-1;MSTRG.4699.1;MSTRG.4699.2
MSTRG.4718	ACOC_0000471701;ACOC_0000471801	ACOC_0000471701-mRNA-1;ACOC_0000471801-mRNA-1;MSTRG.4718.1
MSTRG.4725	ACOC_0000472501;ACOC_0000472601	ACOC_0000472501-mRNA-1;ACOC_0000472601-mRNA-1;MSTRG.4725.1;MSTRG.4725.2
MSTRG.4727	ACOC_0000472801;ACOC_0000472901	ACOC_0000472801-mRNA-1;ACOC_0000472901-mRNA-1;MSTRG.4727.1;MSTRG.4727.3;MSTRG.4727.4;MSTRG.4727.5
MSTRG.4728	ACOC_0000473001;ACOC_0000473101	ACOC_0000473001-mRNA-1;ACOC_0000473101-mRNA-1;MSTRG.4728.1;MSTRG.4728.2
MSTRG.4733	ACOC_0000473501;ACOC_0000473601	ACOC_0000473501-mRNA-1;ACOC_0000473601-mRNA-1;MSTRG.4733.1;MSTRG.4733.3;MSTRG.4733.4
MSTRG.4736	ACOC_0000473901;ACOC_0000474001	ACOC_0000473901-mRNA-1;ACOC_0000474001-mRNA-1;MSTRG.4736.1;MSTRG.4736.3
MSTRG.4739	ACOC_0000474501;ACOC_0000474601;ACOC_0000474701	ACOC_0000474501-mRNA-1;ACOC_0000474601-mRNA-1;ACOC_0000474701-mRNA-1;MSTRG.4739.1;MSTRG.4739.2;MSTRG.4739.4;MSTRG.4739.5;MSTRG.4739.6
MSTRG.4746	ACOC_0000475401;ACOC_0000475501	ACOC_0000475401-mRNA-1;ACOC_0000475501-mRNA-1;MSTRG.4746.1
MSTRG.4749	ACOC_0000475901;ACOC_0000476001	ACOC_0000475901-mRNA-1;ACOC_0000476001-mRNA-1;MSTRG.4749.2;MSTRG.4749.3;MSTRG.4749.4
MSTRG.4750	ACOC_0000476101;ACOC_0000476201	ACOC_0000476101-mRNA-1;ACOC_0000476201-mRNA-1;MSTRG.4750.1;MSTRG.4750.2
MSTRG.4751	ACOC_0000476301;ACOC_0000476401	ACOC_0000476301-mRNA-1;ACOC_0000476401-mRNA-1;MSTRG.4751.1;MSTRG.4751.2
MSTRG.4755	ACOC_0000476801;ACOC_0000476901	ACOC_0000476801-mRNA-1;ACOC_0000476901-mRNA-1;MSTRG.4755.1
MSTRG.4773	ACOC_0000478501;ACOC_0000478601	ACOC_0000478501-mRNA-1;ACOC_0000478601-mRNA-1;MSTRG.4773.1;MSTRG.4773.2;MSTRG.4773.5
MSTRG.4783	ACOC_0000479601;ACOC_0000479701	ACOC_0000479601-mRNA-1;ACOC_0000479701-mRNA-1;MSTRG.4783.1
MSTRG.4789	ACOC_0000480301;ACOC_0000480401	ACOC_0000480301-mRNA-1;ACOC_0000480401-mRNA-1;MSTRG.4789.1
MSTRG.4792	ACOC_0000480701;ACOC_0000480801	ACOC_0000480701-mRNA-1;ACOC_0000480801-mRNA-1;MSTRG.4792.1
MSTRG.4800	ACOC_0000481701;ACOC_0000481801	ACOC_0000481701-mRNA-1;ACOC_0000481801-mRNA-1;MSTRG.4800.1;MSTRG.4800.2
MSTRG.4815	ACOC_0000483101;ACOC_0000483201	ACOC_0000483101-mRNA-1;ACOC_0000483201-mRNA-1;MSTRG.4815.1
MSTRG.4823	ACOC_0000483901;ACOC_0000484001	ACOC_0000483901-mRNA-1;ACOC_0000484001-mRNA-1;MSTRG.4823.1
MSTRG.4872	ACOC_0000488601;ACOC_0000488701	ACOC_0000488601-mRNA-1;ACOC_0000488701-mRNA-1;MSTRG.4872.1
MSTRG.488	ACOC_0000051801;ACOC_0000052001	ACOC_0000051801-mRNA-1;ACOC_0000052001-mRNA-1;MSTRG.488.1
MSTRG.4891	ACOC_0000490901;ACOC_0000491101;ACOC_0000491201;ACOC_0000491301	ACOC_0000490901-mRNA-1;ACOC_0000491101-mRNA-1;ACOC_0000491201-mRNA-1;ACOC_0000491301-mRNA-1;MSTRG.4891.1;MSTRG.4891.3;MSTRG.4891.5
MSTRG.4895	ACOC_0000491601;ACOC_0000491701	ACOC_0000491601-mRNA-1;ACOC_0000491701-mRNA-1;MSTRG.4895.1
MSTRG.49	ACOC_0000005701;ACOC_0000005801;ACOC_0000005901;ACOC_0000006001	ACOC_0000005701-mRNA-1;ACOC_0000005801-mRNA-1;ACOC_0000005901-mRNA-1;ACOC_0000006001-mRNA-1;MSTRG.49.1;MSTRG.49.2
MSTRG.4904	ACOC_0000492401;ACOC_0000492601	ACOC_0000492401-mRNA-1;ACOC_0000492601-mRNA-1;MSTRG.4904.1;MSTRG.4904.2
MSTRG.4921	ACOC_0000494001;ACOC_0000494101	ACOC_0000494001-mRNA-1;ACOC_0000494101-mRNA-1;MSTRG.4921.1;MSTRG.4921.4;MSTRG.4921.5
MSTRG.4930	ACOC_0000495001;ACOC_0000495101	ACOC_0000495001-mRNA-1;ACOC_0000495101-mRNA-1;MSTRG.4930.1
MSTRG.4931	ACOC_0000495301;ACOC_0000495401	ACOC_0000495301-mRNA-1;ACOC_0000495401-mRNA-1;MSTRG.4931.1
MSTRG.4936	ACOC_0000495701;ACOC_0000495801;ACOC_0000495901	ACOC_0000495701-mRNA-1;ACOC_0000495801-mRNA-1;ACOC_0000495901-mRNA-1;MSTRG.4936.1;MSTRG.4936.4
MSTRG.4992	ACOC_0000500501;ACOC_0000500601	ACOC_0000500501-mRNA-1;ACOC_0000500601-mRNA-1;MSTRG.4992.1
MSTRG.4995	ACOC_0000500901;ACOC_0000501001	ACOC_0000500901-mRNA-1;ACOC_0000501001-mRNA-1;MSTRG.4995.1;MSTRG.4995.4
MSTRG.4998	ACOC_0000501301;ACOC_0000501401	ACOC_0000501301-mRNA-1;ACOC_0000501401-mRNA-1;MSTRG.4998.1
MSTRG.5003	ACOC_0000501801;ACOC_0000501901	ACOC_0000501801-mRNA-1;ACOC_0000501901-mRNA-1;MSTRG.5003.1
MSTRG.5007	ACOC_0000502301;ACOC_0000502401	ACOC_0000502301-mRNA-1;ACOC_0000502401-mRNA-1;MSTRG.5007.1
MSTRG.5011	ACOC_0000502801;ACOC_0000502901	ACOC_0000502801-mRNA-1;ACOC_0000502901-mRNA-1;MSTRG.5011.1
MSTRG.5019	ACOC_0000503601;ACOC_0000503701	ACOC_0000503601-mRNA-1;ACOC_0000503701-mRNA-1;MSTRG.5019.2
MSTRG.5022	ACOC_0000504001;ACOC_0000504101	ACOC_0000504001-mRNA-1;ACOC_0000504101-mRNA-1;MSTRG.5022.1
MSTRG.5046	ACOC_0000506401;ACOC_0000506501	ACOC_0000506401-mRNA-1;ACOC_0000506501-mRNA-1;MSTRG.5046.1
MSTRG.5053	ACOC_0000507301;ACOC_0000507401	ACOC_0000507301-mRNA-1;ACOC_0000507401-mRNA-1;MSTRG.5053.1
MSTRG.5060	ACOC_0000507901;ACOC_0000508001;ACOC_0000508101	ACOC_0000507901-mRNA-1;ACOC_0000508001-mRNA-1;ACOC_0000508101-mRNA-1;MSTRG.5060.1;MSTRG.5060.2;MSTRG.5060.3;MSTRG.5060.4;MSTRG.5060.5;MSTRG.5060.6
MSTRG.5063	ACOC_0000508301;ACOC_0000508401	ACOC_0000508301-mRNA-1;ACOC_0000508401-mRNA-1;MSTRG.5063.1;MSTRG.5063.3
MSTRG.5077	ACOC_0000509701;ACOC_0000509801	ACOC_0000509701-mRNA-1;ACOC_0000509801-mRNA-1;MSTRG.5077.1;MSTRG.5077.2
MSTRG.5099	ACOC_0000511701;ACOC_0000511801	ACOC_0000511701-mRNA-1;ACOC_0000511801-mRNA-1;MSTRG.5099.2
MSTRG.5133	ACOC_0000514801;ACOC_0000514901	ACOC_0000514801-mRNA-1;ACOC_0000514901-mRNA-1;MSTRG.5133.1
MSTRG.5173	ACOC_0000518801;ACOC_0000518901	ACOC_0000518801-mRNA-1;ACOC_0000518901-mRNA-1;MSTRG.5173.1
MSTRG.5184	ACOC_0000519901;ACOC_0000520001	ACOC_0000519901-mRNA-1;ACOC_0000520001-mRNA-1;MSTRG.5184.1
MSTRG.5185	ACOC_0000520101;ACOC_0000520201	ACOC_0000520101-mRNA-1;ACOC_0000520201-mRNA-1;MSTRG.5185.1
MSTRG.5187	ACOC_0000520401;ACOC_0000520501	ACOC_0000520401-mRNA-1;ACOC_0000520501-mRNA-1;MSTRG.5187.1;MSTRG.5187.2
MSTRG.519	ACOC_0000054701;ACOC_0000054901	ACOC_0000054701-mRNA-1;ACOC_0000054901-mRNA-1;MSTRG.519.1
MSTRG.5190	ACOC_0000520801;ACOC_0000520901	ACOC_0000520801-mRNA-1;ACOC_0000520901-mRNA-1;MSTRG.5190.1
MSTRG.5192	ACOC_0000521101;ACOC_0000521301	ACOC_0000521101-mRNA-1;ACOC_0000521301-mRNA-1;MSTRG.5192.1
MSTRG.5205	ACOC_0000522601;ACOC_0000522701	ACOC_0000522601-mRNA-1;ACOC_0000522701-mRNA-1;MSTRG.5205.1
MSTRG.5230	ACOC_0000525301;ACOC_0000525401	ACOC_0000525301-mRNA-1;ACOC_0000525401-mRNA-1;MSTRG.5230.1;MSTRG.5230.2;MSTRG.5230.4;MSTRG.5230.5;MSTRG.5230.7
MSTRG.5244	ACOC_0000526801;ACOC_0000526901	ACOC_0000526801-mRNA-1;ACOC_0000526901-mRNA-1;MSTRG.5244.1
MSTRG.5245	ACOC_0000527001;ACOC_0000527101	ACOC_0000527001-mRNA-1;ACOC_0000527101-mRNA-1;MSTRG.5245.1;MSTRG.5245.2
MSTRG.5257	ACOC_0000528301;ACOC_0000528401	ACOC_0000528301-mRNA-1;ACOC_0000528401-mRNA-1;MSTRG.5257.1;MSTRG.5257.2;MSTRG.5257.3;MSTRG.5257.6
MSTRG.5267	ACOC_0000529501;ACOC_0000529601;ACOC_0000529701;ACOC_0000529801	ACOC_0000529501-mRNA-1;ACOC_0000529601-mRNA-1;ACOC_0000529701-mRNA-1;ACOC_0000529801-mRNA-1;MSTRG.5267.1
MSTRG.5282	ACOC_0000531201;ACOC_0000531301	ACOC_0000531201-mRNA-1;ACOC_0000531301-mRNA-1;MSTRG.5282.1
MSTRG.5293	ACOC_0000532201;ACOC_0000532301	ACOC_0000532201-mRNA-1;ACOC_0000532301-mRNA-1;MSTRG.5293.1
MSTRG.530	ACOC_0000056001;ACOC_0000056101	ACOC_0000056001-mRNA-1;ACOC_0000056101-mRNA-1;MSTRG.530.1
MSTRG.5305	ACOC_0000533201;ACOC_0000533301	ACOC_0000533201-mRNA-1;ACOC_0000533301-mRNA-1;MSTRG.5305.1;MSTRG.5305.2
MSTRG.5316	ACOC_0000534401;ACOC_0000534601;ACOC_0000534701	ACOC_0000534401-mRNA-1;ACOC_0000534601-mRNA-1;ACOC_0000534701-mRNA-1;MSTRG.5316.1;MSTRG.5316.2;MSTRG.5316.5
MSTRG.5318	ACOC_0000534801;ACOC_0000534901;ACOC_0000535101	ACOC_0000534801-mRNA-1;ACOC_0000534901-mRNA-1;ACOC_0000535101-mRNA-1;MSTRG.5318.1;MSTRG.5318.4
MSTRG.5337	ACOC_0000536901;ACOC_0000537001	ACOC_0000536901-mRNA-1;ACOC_0000537001-mRNA-1;MSTRG.5337.1;MSTRG.5337.3
MSTRG.5346	ACOC_0000537901;ACOC_0000538001	ACOC_0000537901-mRNA-1;ACOC_0000538001-mRNA-1;MSTRG.5346.1
MSTRG.5348	ACOC_0000538201;ACOC_0000538301	ACOC_0000538201-mRNA-1;ACOC_0000538301-mRNA-1;MSTRG.5348.1
MSTRG.5355	ACOC_0000539001;ACOC_0000539201	ACOC_0000539001-mRNA-1;ACOC_0000539201-mRNA-1;MSTRG.5355.1
MSTRG.537	ACOC_0000056901;ACOC_0000057001;ACOC_0000057101	ACOC_0000056901-mRNA-1;ACOC_0000057001-mRNA-1;ACOC_0000057101-mRNA-1;MSTRG.537.1;MSTRG.537.2;MSTRG.537.4;MSTRG.537.5;MSTRG.537.6
MSTRG.5377	ACOC_0000541001;ACOC_0000541101	ACOC_0000541001-mRNA-1;ACOC_0000541101-mRNA-1;MSTRG.5377.1;MSTRG.5377.2
MSTRG.5380	ACOC_0000541401;ACOC_0000541501	ACOC_0000541401-mRNA-1;ACOC_0000541501-mRNA-1;MSTRG.5380.1
MSTRG.5410	ACOC_0000543901;ACOC_0000544001	ACOC_0000543901-mRNA-1;ACOC_0000544001-mRNA-1;MSTRG.5410.2;MSTRG.5410.3
MSTRG.5418	ACOC_0000544701;ACOC_0000544801;ACOC_0000544901	ACOC_0000544701-mRNA-1;ACOC_0000544801-mRNA-1;ACOC_0000544901-mRNA-1;MSTRG.5418.1;MSTRG.5418.2
MSTRG.5423	ACOC_0000545301;ACOC_0000545401	ACOC_0000545301-mRNA-1;ACOC_0000545401-mRNA-1;MSTRG.5423.1
MSTRG.5447	ACOC_0000547601;ACOC_0000547701	ACOC_0000547601-mRNA-1;ACOC_0000547701-mRNA-1;MSTRG.5447.1
MSTRG.5454	ACOC_0000548101;ACOC_0000548201;ACOC_0000548301	ACOC_0000548101-mRNA-1;ACOC_0000548201-mRNA-1;ACOC_0000548301-mRNA-1;MSTRG.5454.1;MSTRG.5454.2
MSTRG.5461	ACOC_0000549001;ACOC_0000549201	ACOC_0000549001-mRNA-1;ACOC_0000549201-mRNA-1;MSTRG.5461.2
MSTRG.5465	ACOC_0000549901;ACOC_0000550001	ACOC_0000549901-mRNA-1;ACOC_0000550001-mRNA-1;MSTRG.5465.1
MSTRG.5474	ACOC_0000550801;ACOC_0000550901	ACOC_0000550801-mRNA-1;ACOC_0000550901-mRNA-1;MSTRG.5474.1
MSTRG.5496	ACOC_0000552701;ACOC_0000552901	ACOC_0000552701-mRNA-1;ACOC_0000552901-mRNA-1;MSTRG.5496.2;MSTRG.5496.3
MSTRG.5499	ACOC_0000553101;ACOC_0000553201	ACOC_0000553101-mRNA-1;ACOC_0000553201-mRNA-1;MSTRG.5499.1
MSTRG.5512	ACOC_0000554501;ACOC_0000554601;ACOC_0000554701	ACOC_0000554501-mRNA-1;ACOC_0000554601-mRNA-1;ACOC_0000554701-mRNA-1;MSTRG.5512.1
MSTRG.5514	ACOC_0000554901;ACOC_0000555001	ACOC_0000554901-mRNA-1;ACOC_0000555001-mRNA-1;MSTRG.5514.1
MSTRG.5515	ACOC_0000555101;ACOC_0000555301	ACOC_0000555101-mRNA-1;ACOC_0000555301-mRNA-1;MSTRG.5515.1
MSTRG.5520	ACOC_0000555701;ACOC_0000555801	ACOC_0000555701-mRNA-1;ACOC_0000555801-mRNA-1;MSTRG.5520.2;MSTRG.5520.3;MSTRG.5520.5
MSTRG.553	ACOC_0000058801;ACOC_0000058901	ACOC_0000058801-mRNA-1;ACOC_0000058901-mRNA-1;MSTRG.553.1
MSTRG.5533	ACOC_0000556801;ACOC_0000556901	ACOC_0000556801-mRNA-1;ACOC_0000556901-mRNA-1;MSTRG.5533.1
MSTRG.5536	ACOC_0000557201;ACOC_0000557301	ACOC_0000557201-mRNA-1;ACOC_0000557301-mRNA-1;MSTRG.5536.1;MSTRG.5536.2
MSTRG.5537	ACOC_0000557401;ACOC_0000557801	ACOC_0000557401-mRNA-1;ACOC_0000557801-mRNA-1;MSTRG.5537.1;MSTRG.5537.3
MSTRG.5546	ACOC_0000558301;ACOC_0000558401	ACOC_0000558301-mRNA-1;ACOC_0000558401-mRNA-1;MSTRG.5546.1
MSTRG.5550	ACOC_0000558801;ACOC_0000559001	ACOC_0000558801-mRNA-1;ACOC_0000559001-mRNA-1;MSTRG.5550.1;MSTRG.5550.2
MSTRG.5565	ACOC_0000560501;ACOC_0000560601	ACOC_0000560501-mRNA-1;ACOC_0000560601-mRNA-1;MSTRG.5565.1;MSTRG.5565.2
MSTRG.5571	ACOC_0000561201;ACOC_0000561301	ACOC_0000561201-mRNA-1;ACOC_0000561301-mRNA-1;MSTRG.5571.1;MSTRG.5571.2;MSTRG.5571.3
MSTRG.5579	ACOC_0000562201;ACOC_0000562301	ACOC_0000562201-mRNA-1;ACOC_0000562301-mRNA-1;MSTRG.5579.1
MSTRG.5622	ACOC_0000566201;ACOC_0000566301	ACOC_0000566201-mRNA-1;ACOC_0000566301-mRNA-1;MSTRG.5622.1
MSTRG.5625	ACOC_0000566601;ACOC_0000566701	ACOC_0000566601-mRNA-1;ACOC_0000566701-mRNA-1;MSTRG.5625.1;MSTRG.5625.2;MSTRG.5625.4
MSTRG.5631	ACOC_0000567301;ACOC_0000567401	ACOC_0000567301-mRNA-1;ACOC_0000567401-mRNA-1;MSTRG.5631.1;MSTRG.5631.2
MSTRG.5633	ACOC_0000567601;ACOC_0000567701	ACOC_0000567601-mRNA-1;ACOC_0000567701-mRNA-1;MSTRG.5633.1
MSTRG.5642	ACOC_0000568401;ACOC_0000568501;ACOC_0000568601	ACOC_0000568401-mRNA-1;ACOC_0000568501-mRNA-1;ACOC_0000568601-mRNA-1;MSTRG.5642.1
MSTRG.5643	ACOC_0000568701;ACOC_0000568801	ACOC_0000568701-mRNA-1;ACOC_0000568801-mRNA-1;MSTRG.5643.1
MSTRG.5644	ACOC_0000568901;ACOC_0000569001	ACOC_0000568901-mRNA-1;ACOC_0000569001-mRNA-1;MSTRG.5644.1
MSTRG.5663	ACOC_0000571001;ACOC_0000571101	ACOC_0000571001-mRNA-1;ACOC_0000571101-mRNA-1;MSTRG.5663.1
MSTRG.5689	ACOC_0000573701;ACOC_0000573801	ACOC_0000573701-mRNA-1;ACOC_0000573801-mRNA-1;MSTRG.5689.1
MSTRG.5693	ACOC_0000574201;ACOC_0000574301	ACOC_0000574201-mRNA-1;ACOC_0000574301-mRNA-1;MSTRG.5693.1;MSTRG.5693.4
MSTRG.5708	ACOC_0000575701;ACOC_0000575801	ACOC_0000575701-mRNA-1;ACOC_0000575801-mRNA-1;MSTRG.5708.1;MSTRG.5708.2
MSTRG.5725	ACOC_0000577401;ACOC_0000577501	ACOC_0000577401-mRNA-1;ACOC_0000577501-mRNA-1;MSTRG.5725.2
MSTRG.5763	ACOC_0000581401;ACOC_0000581501	ACOC_0000581401-mRNA-1;ACOC_0000581501-mRNA-1;MSTRG.5763.2
MSTRG.5794	ACOC_0000584201;ACOC_0000584401	ACOC_0000584201-mRNA-1;ACOC_0000584401-mRNA-1;MSTRG.5794.1
MSTRG.5801	ACOC_0000584901;ACOC_0000585001	ACOC_0000584901-mRNA-1;ACOC_0000585001-mRNA-1;MSTRG.5801.1
MSTRG.5804	ACOC_0000585301;ACOC_0000585401	ACOC_0000585301-mRNA-1;ACOC_0000585401-mRNA-1;MSTRG.5804.1;MSTRG.5804.2
MSTRG.5805	ACOC_0000585501;ACOC_0000585601;ACOC_0000585801	ACOC_0000585501-mRNA-1;ACOC_0000585601-mRNA-1;ACOC_0000585801-mRNA-1;MSTRG.5805.1;MSTRG.5805.3
MSTRG.582	ACOC_0000061601;ACOC_0000061701	ACOC_0000061601-mRNA-1;ACOC_0000061701-mRNA-1;MSTRG.582.1;MSTRG.582.2
MSTRG.5826	ACOC_0000587901;ACOC_0000588001	ACOC_0000587901-mRNA-1;ACOC_0000588001-mRNA-1;MSTRG.5826.1;MSTRG.5826.3;MSTRG.5826.4
MSTRG.584	ACOC_0000061901;ACOC_0000062001	ACOC_0000061901-mRNA-1;ACOC_0000062001-mRNA-1;MSTRG.584.1;MSTRG.584.2
MSTRG.5840	ACOC_0000589901;ACOC_0000590001	ACOC_0000589901-mRNA-1;ACOC_0000590001-mRNA-1;MSTRG.5840.1
MSTRG.5857	ACOC_0000591501;ACOC_0000591601	ACOC_0000591501-mRNA-1;ACOC_0000591601-mRNA-1;MSTRG.5857.1;MSTRG.5857.2;MSTRG.5857.3
MSTRG.5861	ACOC_0000591901;ACOC_0000592001;ACOC_0000592101	ACOC_0000591901-mRNA-1;ACOC_0000592001-mRNA-1;ACOC_0000592101-mRNA-1;MSTRG.5861.1;MSTRG.5861.4
MSTRG.5873	ACOC_0000593201;ACOC_0000593401	ACOC_0000593201-mRNA-1;ACOC_0000593401-mRNA-1;MSTRG.5873.1
MSTRG.5887	ACOC_0000594401;ACOC_0000594501	ACOC_0000594401-mRNA-1;ACOC_0000594501-mRNA-1;MSTRG.5887.1;MSTRG.5887.2
MSTRG.5893	ACOC_0000595101;ACOC_0000595301	ACOC_0000595101-mRNA-1;ACOC_0000595301-mRNA-1;MSTRG.5893.2
MSTRG.5895	ACOC_0000595401;ACOC_0000595501	ACOC_0000595401-mRNA-1;ACOC_0000595501-mRNA-1;MSTRG.5895.1;MSTRG.5895.2
MSTRG.5896	ACOC_0000595601;ACOC_0000595701	ACOC_0000595601-mRNA-1;ACOC_0000595701-mRNA-1;MSTRG.5896.1
MSTRG.591	ACOC_0000062401;ACOC_0000062501	ACOC_0000062401-mRNA-1;ACOC_0000062501-mRNA-1;MSTRG.591.1
MSTRG.5910	ACOC_0000597201;ACOC_0000597301	ACOC_0000597201-mRNA-1;ACOC_0000597301-mRNA-1;MSTRG.5910.1;MSTRG.5910.2
MSTRG.5911	ACOC_0000597401;ACOC_0000597501;ACOC_0000597601	ACOC_0000597401-mRNA-1;ACOC_0000597501-mRNA-1;ACOC_0000597601-mRNA-1;MSTRG.5911.1
MSTRG.5964	ACOC_0000602701;ACOC_0000602801	ACOC_0000602701-mRNA-1;ACOC_0000602801-mRNA-1;MSTRG.5964.1;MSTRG.5964.2;MSTRG.5964.3
MSTRG.5972	ACOC_0000603401;ACOC_0000603501	ACOC_0000603401-mRNA-1;ACOC_0000603501-mRNA-1;MSTRG.5972.1
MSTRG.5976	ACOC_0000603901;ACOC_0000604101;ACOC_0000604201	ACOC_0000603901-mRNA-1;ACOC_0000604101-mRNA-1;ACOC_0000604201-mRNA-1;MSTRG.5976.1
MSTRG.5998	ACOC_0000606001;ACOC_0000606201	ACOC_0000606001-mRNA-1;ACOC_0000606201-mRNA-1;MSTRG.5998.1
MSTRG.6007	ACOC_0000607001;ACOC_0000607101	ACOC_0000607001-mRNA-1;ACOC_0000607101-mRNA-1;MSTRG.6007.1
MSTRG.6008	ACOC_0000607201;ACOC_0000607301;ACOC_0000607401	ACOC_0000607201-mRNA-1;ACOC_0000607301-mRNA-1;ACOC_0000607401-mRNA-1;MSTRG.6008.1;MSTRG.6008.2
MSTRG.6017	ACOC_0000608201;ACOC_0000608301	ACOC_0000608201-mRNA-1;ACOC_0000608301-mRNA-1;MSTRG.6017.1
MSTRG.6031	ACOC_0000609901;ACOC_0000610001;ACOC_0000610101	ACOC_0000609901-mRNA-1;ACOC_0000610001-mRNA-1;ACOC_0000610101-mRNA-1;MSTRG.6031.1;MSTRG.6031.4
MSTRG.6042	ACOC_0000611001;ACOC_0000611101	ACOC_0000611001-mRNA-1;ACOC_0000611101-mRNA-1;MSTRG.6042.2;MSTRG.6042.3
MSTRG.6045	ACOC_0000611401;ACOC_0000611501	ACOC_0000611401-mRNA-1;ACOC_0000611501-mRNA-1;MSTRG.6045.1;MSTRG.6045.2;MSTRG.6045.3
MSTRG.6056	ACOC_0000612601;ACOC_0000612701	ACOC_0000612601-mRNA-1;ACOC_0000612701-mRNA-1;MSTRG.6056.1
MSTRG.6074	ACOC_0000614501;ACOC_0000614601	ACOC_0000614501-mRNA-1;ACOC_0000614601-mRNA-1;MSTRG.6074.1
MSTRG.6094	ACOC_0000616201;ACOC_0000616301	ACOC_0000616201-mRNA-1;ACOC_0000616301-mRNA-1;MSTRG.6094.1
MSTRG.6096	ACOC_0000616501;ACOC_0000616601	ACOC_0000616501-mRNA-1;ACOC_0000616601-mRNA-1;MSTRG.6096.1
MSTRG.6097	ACOC_0000616701;ACOC_0000616801	ACOC_0000616701-mRNA-1;ACOC_0000616801-mRNA-1;MSTRG.6097.1;MSTRG.6097.2
MSTRG.6110	ACOC_0000617801;ACOC_0000617901	ACOC_0000617801-mRNA-1;ACOC_0000617901-mRNA-1;MSTRG.6110.1;MSTRG.6110.2
MSTRG.6115	ACOC_0000618301;ACOC_0000618401	ACOC_0000618301-mRNA-1;ACOC_0000618401-mRNA-1;MSTRG.6115.1
MSTRG.6118	ACOC_0000618701;ACOC_0000618801	ACOC_0000618701-mRNA-1;ACOC_0000618801-mRNA-1;MSTRG.6118.1;MSTRG.6118.3
MSTRG.6133	ACOC_0000620401;ACOC_0000620501	ACOC_0000620401-mRNA-1;ACOC_0000620501-mRNA-1;MSTRG.6133.1
MSTRG.6141	ACOC_0000621301;ACOC_0000621401	ACOC_0000621301-mRNA-1;ACOC_0000621401-mRNA-1;MSTRG.6141.1;MSTRG.6141.3
MSTRG.6166	ACOC_0000623501;ACOC_0000623701	ACOC_0000623501-mRNA-1;ACOC_0000623701-mRNA-1;MSTRG.6166.1
MSTRG.6181	ACOC_0000624401;ACOC_0000624501	ACOC_0000624401-mRNA-1;ACOC_0000624501-mRNA-1;MSTRG.6181.1
MSTRG.6194	ACOC_0000625701;ACOC_0000625801	ACOC_0000625701-mRNA-1;ACOC_0000625801-mRNA-1;MSTRG.6194.1
MSTRG.6198	ACOC_0000626101;ACOC_0000626301;ACOC_0000626401	ACOC_0000626101-mRNA-1;ACOC_0000626301-mRNA-1;ACOC_0000626401-mRNA-1;MSTRG.6198.1
MSTRG.6213	ACOC_0000627701;ACOC_0000627801;ACOC_0000627901	ACOC_0000627701-mRNA-1;ACOC_0000627801-mRNA-1;ACOC_0000627901-mRNA-1;MSTRG.6213.2
MSTRG.6214	ACOC_0000628001;ACOC_0000628101;ACOC_0000628201	ACOC_0000628001-mRNA-1;ACOC_0000628101-mRNA-1;ACOC_0000628201-mRNA-1;MSTRG.6214.1
MSTRG.6216	ACOC_0000628501;ACOC_0000628601	ACOC_0000628501-mRNA-1;ACOC_0000628601-mRNA-1;MSTRG.6216.1;MSTRG.6216.2;MSTRG.6216.5;MSTRG.6216.6
MSTRG.6217	ACOC_0000628701;ACOC_0000628801	ACOC_0000628701-mRNA-1;ACOC_0000628801-mRNA-1;MSTRG.6217.1;MSTRG.6217.2
MSTRG.6223	ACOC_0000629101;ACOC_0000629201	ACOC_0000629101-mRNA-1;ACOC_0000629201-mRNA-1;MSTRG.6223.2;MSTRG.6223.4
MSTRG.6234	ACOC_0000630401;ACOC_0000630501	ACOC_0000630401-mRNA-1;ACOC_0000630501-mRNA-1;MSTRG.6234.1;MSTRG.6234.2
MSTRG.6255	ACOC_0000632601;ACOC_0000632701	ACOC_0000632601-mRNA-1;ACOC_0000632701-mRNA-1;MSTRG.6255.1;MSTRG.6255.2
MSTRG.6268	ACOC_0000633801;ACOC_0000633901;ACOC_0000634001	ACOC_0000633801-mRNA-1;ACOC_0000633901-mRNA-1;ACOC_0000634001-mRNA-1;MSTRG.6268.1
MSTRG.6275	ACOC_0000634601;ACOC_0000634701	ACOC_0000634601-mRNA-1;ACOC_0000634701-mRNA-1;MSTRG.6275.1
MSTRG.6281	ACOC_0000635301;ACOC_0000635401	ACOC_0000635301-mRNA-1;ACOC_0000635401-mRNA-1;MSTRG.6281.1;MSTRG.6281.3
MSTRG.6295	ACOC_0000636701;ACOC_0000636801	ACOC_0000636701-mRNA-1;ACOC_0000636801-mRNA-1;MSTRG.6295.1
MSTRG.6310	ACOC_0000638201;ACOC_0000638401	ACOC_0000638201-mRNA-1;ACOC_0000638401-mRNA-1;MSTRG.6310.1
MSTRG.6316	ACOC_0000639001;ACOC_0000639101	ACOC_0000639001-mRNA-1;ACOC_0000639101-mRNA-1;MSTRG.6316.1
MSTRG.6318	ACOC_0000639301;ACOC_0000639401	ACOC_0000639301-mRNA-1;ACOC_0000639401-mRNA-1;MSTRG.6318.1
MSTRG.6326	ACOC_0000640201;ACOC_0000640301	ACOC_0000640201-mRNA-1;ACOC_0000640301-mRNA-1;MSTRG.6326.1
MSTRG.6327	ACOC_0000640401;ACOC_0000640501;ACOC_0000640601	ACOC_0000640401-mRNA-1;ACOC_0000640501-mRNA-1;ACOC_0000640601-mRNA-1;MSTRG.6327.1;MSTRG.6327.2
MSTRG.633	ACOC_0000066401;ACOC_0000066501	ACOC_0000066401-mRNA-1;ACOC_0000066501-mRNA-1;MSTRG.633.1;MSTRG.633.2;MSTRG.633.3;MSTRG.633.4;MSTRG.633.6
MSTRG.6336	ACOC_0000641301;ACOC_0000641501	ACOC_0000641301-mRNA-1;ACOC_0000641501-mRNA-1;MSTRG.6336.1
MSTRG.6347	ACOC_0000642201;ACOC_0000642301	ACOC_0000642201-mRNA-1;ACOC_0000642301-mRNA-1;MSTRG.6347.1
MSTRG.6362	ACOC_0000643501;ACOC_0000643601	ACOC_0000643501-mRNA-1;ACOC_0000643601-mRNA-1;MSTRG.6362.1;MSTRG.6362.3
MSTRG.6366	ACOC_0000644001;ACOC_0000644101	ACOC_0000644001-mRNA-1;ACOC_0000644101-mRNA-1;MSTRG.6366.1;MSTRG.6366.2
MSTRG.6370	ACOC_0000644501;ACOC_0000644601	ACOC_0000644501-mRNA-1;ACOC_0000644601-mRNA-1;MSTRG.6370.2
MSTRG.6393	ACOC_0000646701;ACOC_0000646801;ACOC_0000646901	ACOC_0000646701-mRNA-1;ACOC_0000646801-mRNA-1;ACOC_0000646901-mRNA-1;MSTRG.6393.1;MSTRG.6393.2
MSTRG.6403	ACOC_0000647601;ACOC_0000647701	ACOC_0000647601-mRNA-1;ACOC_0000647701-mRNA-1;MSTRG.6403.1;MSTRG.6403.4
MSTRG.6419	ACOC_0000649501;ACOC_0000649601	ACOC_0000649501-mRNA-1;ACOC_0000649601-mRNA-1;MSTRG.6419.1
MSTRG.6422	ACOC_0000649801;ACOC_0000649901	ACOC_0000649801-mRNA-1;ACOC_0000649901-mRNA-1;MSTRG.6422.1;MSTRG.6422.2
MSTRG.6426	ACOC_0000650301;ACOC_0000650401;ACOC_0000650501	ACOC_0000650301-mRNA-1;ACOC_0000650401-mRNA-1;ACOC_0000650501-mRNA-1;MSTRG.6426.1
MSTRG.6429	ACOC_0000650801;ACOC_0000650901	ACOC_0000650801-mRNA-1;ACOC_0000650901-mRNA-1;MSTRG.6429.1
MSTRG.6433	ACOC_0000651201;ACOC_0000651301	ACOC_0000651201-mRNA-1;ACOC_0000651301-mRNA-1;MSTRG.6433.1
MSTRG.6436	ACOC_0000651501;ACOC_0000651601	ACOC_0000651501-mRNA-1;ACOC_0000651601-mRNA-1;MSTRG.6436.1
MSTRG.6448	ACOC_0000653001;ACOC_0000653101	ACOC_0000653001-mRNA-1;ACOC_0000653101-mRNA-1;MSTRG.6448.1
MSTRG.6450	ACOC_0000653301;ACOC_0000653401	ACOC_0000653301-mRNA-1;ACOC_0000653401-mRNA-1;MSTRG.6450.1;MSTRG.6450.2
MSTRG.6460	ACOC_0000654101;ACOC_0000654201	ACOC_0000654101-mRNA-1;ACOC_0000654201-mRNA-1;MSTRG.6460.2
MSTRG.6465	ACOC_0000654701;ACOC_0000654801;ACOC_0000654901	ACOC_0000654701-mRNA-1;ACOC_0000654801-mRNA-1;ACOC_0000654901-mRNA-1;MSTRG.6465.1;MSTRG.6465.2
MSTRG.6466	ACOC_0000655001;ACOC_0000655101	ACOC_0000655001-mRNA-1;ACOC_0000655101-mRNA-1;MSTRG.6466.1;MSTRG.6466.3
MSTRG.6469	ACOC_0000655401;ACOC_0000655501	ACOC_0000655401-mRNA-1;ACOC_0000655501-mRNA-1;MSTRG.6469.2
MSTRG.6471	ACOC_0000655701;ACOC_0000655801	ACOC_0000655701-mRNA-1;ACOC_0000655801-mRNA-1;MSTRG.6471.1
MSTRG.6479	ACOC_0000656601;ACOC_0000656701	ACOC_0000656601-mRNA-1;ACOC_0000656701-mRNA-1;MSTRG.6479.1;MSTRG.6479.2
MSTRG.6521	ACOC_0000660401;ACOC_0000660501	ACOC_0000660401-mRNA-1;ACOC_0000660501-mRNA-1;MSTRG.6521.1;MSTRG.6521.2;MSTRG.6521.3
MSTRG.6524	ACOC_0000660801;ACOC_0000660901	ACOC_0000660801-mRNA-1;ACOC_0000660901-mRNA-1;MSTRG.6524.1;MSTRG.6524.2;MSTRG.6524.3
MSTRG.6527	ACOC_0000661101;ACOC_0000661201	ACOC_0000661101-mRNA-1;ACOC_0000661201-mRNA-1;MSTRG.6527.2;MSTRG.6527.3;MSTRG.6527.4
MSTRG.6528	ACOC_0000661301;ACOC_0000661401	ACOC_0000661301-mRNA-1;ACOC_0000661401-mRNA-1;MSTRG.6528.1;MSTRG.6528.2
MSTRG.6557	ACOC_0000663901;ACOC_0000664001	ACOC_0000663901-mRNA-1;ACOC_0000664001-mRNA-1;MSTRG.6557.1;MSTRG.6557.2
MSTRG.6585	ACOC_0000666601;ACOC_0000666701	ACOC_0000666601-mRNA-1;ACOC_0000666701-mRNA-1;MSTRG.6585.1
MSTRG.6592	ACOC_0000667401;ACOC_0000667501	ACOC_0000667401-mRNA-1;ACOC_0000667501-mRNA-1;MSTRG.6592.1
MSTRG.6594	ACOC_0000667701;ACOC_0000667801	ACOC_0000667701-mRNA-1;ACOC_0000667801-mRNA-1;MSTRG.6594.2;MSTRG.6594.4
MSTRG.6625	ACOC_0000670701;ACOC_0000670801	ACOC_0000670701-mRNA-1;ACOC_0000670801-mRNA-1;MSTRG.6625.1;MSTRG.6625.2
MSTRG.6631	ACOC_0000671301;ACOC_0000671401	ACOC_0000671301-mRNA-1;ACOC_0000671401-mRNA-1;MSTRG.6631.1
MSTRG.6632	ACOC_0000671501;ACOC_0000671601	ACOC_0000671501-mRNA-1;ACOC_0000671601-mRNA-1;MSTRG.6632.1;MSTRG.6632.2
MSTRG.6645	ACOC_0000672501;ACOC_0000672601	ACOC_0000672501-mRNA-1;ACOC_0000672601-mRNA-1;MSTRG.6645.1
MSTRG.6648	ACOC_0000672901;ACOC_0000673001;ACOC_0000673201	ACOC_0000672901-mRNA-1;ACOC_0000673001-mRNA-1;ACOC_0000673201-mRNA-1;MSTRG.6648.1;MSTRG.6648.2;MSTRG.6648.3
MSTRG.6654	ACOC_0000673601;ACOC_0000673701	ACOC_0000673601-mRNA-1;ACOC_0000673701-mRNA-1;MSTRG.6654.1
MSTRG.6664	ACOC_0000674701;ACOC_0000674901	ACOC_0000674701-mRNA-1;ACOC_0000674901-mRNA-1;MSTRG.6664.2;MSTRG.6664.3
MSTRG.6666	ACOC_0000675001;ACOC_0000675101	ACOC_0000675001-mRNA-1;ACOC_0000675101-mRNA-1;MSTRG.6666.1
MSTRG.6668	ACOC_0000675301;ACOC_0000675401	ACOC_0000675301-mRNA-1;ACOC_0000675401-mRNA-1;MSTRG.6668.1
MSTRG.6676	ACOC_0000676201;ACOC_0000676301	ACOC_0000676201-mRNA-1;ACOC_0000676301-mRNA-1;MSTRG.6676.1
MSTRG.668	ACOC_0000069701;ACOC_0000069801	ACOC_0000069701-mRNA-1;ACOC_0000069801-mRNA-1;MSTRG.668.1
MSTRG.6700	ACOC_0000678901;ACOC_0000679001	ACOC_0000678901-mRNA-1;ACOC_0000679001-mRNA-1;MSTRG.6700.1
MSTRG.6710	ACOC_0000679801;ACOC_0000680001	ACOC_0000679801-mRNA-1;ACOC_0000680001-mRNA-1;MSTRG.6710.1;MSTRG.6710.2
MSTRG.6715	ACOC_0000680401;ACOC_0000680501	ACOC_0000680401-mRNA-1;ACOC_0000680501-mRNA-1;MSTRG.6715.1
MSTRG.674	ACOC_0000070401;ACOC_0000070501	ACOC_0000070401-mRNA-1;ACOC_0000070501-mRNA-1;MSTRG.674.2
MSTRG.6741	ACOC_0000682601;ACOC_0000682701	ACOC_0000682601-mRNA-1;ACOC_0000682701-mRNA-1;MSTRG.6741.1
MSTRG.6747	ACOC_0000683201;ACOC_0000683401	ACOC_0000683201-mRNA-1;ACOC_0000683401-mRNA-1;MSTRG.6747.1
MSTRG.6775	ACOC_0000686201;ACOC_0000686301	ACOC_0000686201-mRNA-1;ACOC_0000686301-mRNA-1;MSTRG.6775.1
MSTRG.6785	ACOC_0000687301;ACOC_0000687401;ACOC_0000687501	ACOC_0000687301-mRNA-1;ACOC_0000687401-mRNA-1;ACOC_0000687501-mRNA-1;MSTRG.6785.1;MSTRG.6785.2;MSTRG.6785.3;MSTRG.6785.4
MSTRG.6791	ACOC_0000688101;ACOC_0000688201	ACOC_0000688101-mRNA-1;ACOC_0000688201-mRNA-1;MSTRG.6791.1;MSTRG.6791.3
MSTRG.68	ACOC_0000007801;ACOC_0000007901;ACOC_0000008001	ACOC_0000007801-mRNA-1;ACOC_0000007901-mRNA-1;ACOC_0000008001-mRNA-1;MSTRG.68.1;MSTRG.68.3
MSTRG.6812	ACOC_0000690201;ACOC_0000690301	ACOC_0000690201-mRNA-1;ACOC_0000690301-mRNA-1;MSTRG.6812.1;MSTRG.6812.2
MSTRG.6814	ACOC_0000690501;ACOC_0000690601	ACOC_0000690501-mRNA-1;ACOC_0000690601-mRNA-1;MSTRG.6814.1;MSTRG.6814.2
MSTRG.6818	ACOC_0000691001;ACOC_0000691101;ACOC_0000691201	ACOC_0000691001-mRNA-1;ACOC_0000691101-mRNA-1;ACOC_0000691201-mRNA-1;MSTRG.6818.1
MSTRG.6819	ACOC_0000691301;ACOC_0000691401	ACOC_0000691301-mRNA-1;ACOC_0000691401-mRNA-1;MSTRG.6819.1
MSTRG.682	ACOC_0000071301;ACOC_0000071401	ACOC_0000071301-mRNA-1;ACOC_0000071401-mRNA-1;MSTRG.682.1
MSTRG.6820	ACOC_0000691501;ACOC_0000691601	ACOC_0000691501-mRNA-1;ACOC_0000691601-mRNA-1;MSTRG.6820.2;MSTRG.6820.3;MSTRG.6820.4;MSTRG.6820.6
MSTRG.6833	ACOC_0000692801;ACOC_0000692901	ACOC_0000692801-mRNA-1;ACOC_0000692901-mRNA-1;MSTRG.6833.1
MSTRG.6836	ACOC_0000693201;ACOC_0000693401	ACOC_0000693201-mRNA-1;ACOC_0000693401-mRNA-1;MSTRG.6836.1;MSTRG.6836.3;MSTRG.6836.4
MSTRG.6844	ACOC_0000694001;ACOC_0000694101;ACOC_0000694201	ACOC_0000694001-mRNA-1;ACOC_0000694101-mRNA-1;ACOC_0000694201-mRNA-1;MSTRG.6844.1
MSTRG.6870	ACOC_0000696801;ACOC_0000696901	ACOC_0000696801-mRNA-1;ACOC_0000696901-mRNA-1;MSTRG.6870.1
MSTRG.6883	ACOC_0000698201;ACOC_0000698401	ACOC_0000698201-mRNA-1;ACOC_0000698401-mRNA-1;MSTRG.6883.1;MSTRG.6883.2;MSTRG.6883.3
MSTRG.6893	ACOC_0000698901;ACOC_0000699001	ACOC_0000698901-mRNA-1;ACOC_0000699001-mRNA-1;MSTRG.6893.1;MSTRG.6893.2
MSTRG.690	ACOC_0000072201;ACOC_0000072301	ACOC_0000072201-mRNA-1;ACOC_0000072301-mRNA-1;MSTRG.690.1
MSTRG.6904	ACOC_0000699901;ACOC_0000700001	ACOC_0000699901-mRNA-1;ACOC_0000700001-mRNA-1;MSTRG.6904.1
MSTRG.6906	ACOC_0000700201;ACOC_0000700301	ACOC_0000700201-mRNA-1;ACOC_0000700301-mRNA-1;MSTRG.6906.1;MSTRG.6906.2
MSTRG.6918	ACOC_0000701501;ACOC_0000701601;ACOC_0000701701	ACOC_0000701501-mRNA-1;ACOC_0000701601-mRNA-1;ACOC_0000701701-mRNA-1;MSTRG.6918.1;MSTRG.6918.3;MSTRG.6918.4
MSTRG.6939	ACOC_0000703401;ACOC_0000703501	ACOC_0000703401-mRNA-1;ACOC_0000703501-mRNA-1;MSTRG.6939.1
MSTRG.6958	ACOC_0000705501;ACOC_0000705601;ACOC_0000705701;ACOC_0000705801	ACOC_0000705501-mRNA-1;ACOC_0000705601-mRNA-1;ACOC_0000705701-mRNA-1;ACOC_0000705801-mRNA-1;MSTRG.6958.1
MSTRG.6965	ACOC_0000706601;ACOC_0000706701	ACOC_0000706601-mRNA-1;ACOC_0000706701-mRNA-1;MSTRG.6965.1
MSTRG.6976	ACOC_0000708001;ACOC_0000708101	ACOC_0000708001-mRNA-1;ACOC_0000708101-mRNA-1;MSTRG.6976.1;MSTRG.6976.2
MSTRG.6983	ACOC_0000708701;ACOC_0000708801	ACOC_0000708701-mRNA-1;ACOC_0000708801-mRNA-1;MSTRG.6983.1;MSTRG.6983.2
MSTRG.6988	ACOC_0000709401;ACOC_0000709501	ACOC_0000709401-mRNA-1;ACOC_0000709501-mRNA-1;MSTRG.6988.1;MSTRG.6988.2
MSTRG.6999	ACOC_0000710201;ACOC_0000710301	ACOC_0000710201-mRNA-1;ACOC_0000710301-mRNA-1;MSTRG.6999.1
MSTRG.7006	ACOC_0000710901;ACOC_0000711001	ACOC_0000710901-mRNA-1;ACOC_0000711001-mRNA-1;MSTRG.7006.1
MSTRG.7020	ACOC_0000712201;ACOC_0000712401;ACOC_0000712501;ACOC_0000712601	ACOC_0000712201-mRNA-1;ACOC_0000712401-mRNA-1;ACOC_0000712501-mRNA-1;ACOC_0000712601-mRNA-1;MSTRG.7020.1;MSTRG.7020.2
MSTRG.7024	ACOC_0000712901;ACOC_0000713001	ACOC_0000712901-mRNA-1;ACOC_0000713001-mRNA-1;MSTRG.7024.1;MSTRG.7024.2;MSTRG.7024.3;MSTRG.7024.4;MSTRG.7024.5;MSTRG.7024.6
MSTRG.7032	ACOC_0000713701;ACOC_0000713801	ACOC_0000713701-mRNA-1;ACOC_0000713801-mRNA-1;MSTRG.7032.2
MSTRG.7043	ACOC_0000714901;ACOC_0000715001	ACOC_0000714901-mRNA-1;ACOC_0000715001-mRNA-1;MSTRG.7043.2
MSTRG.7083	ACOC_0000718601;ACOC_0000718701	ACOC_0000718601-mRNA-1;ACOC_0000718701-mRNA-1;MSTRG.7083.1;MSTRG.7083.2
MSTRG.7090	ACOC_0000719401;ACOC_0000719501	ACOC_0000719401-mRNA-1;ACOC_0000719501-mRNA-1;MSTRG.7090.1
MSTRG.710	ACOC_0000074401;ACOC_0000074501	ACOC_0000074401-mRNA-1;ACOC_0000074501-mRNA-1;MSTRG.710.1
MSTRG.7102	ACOC_0000720501;ACOC_0000720601	ACOC_0000720501-mRNA-1;ACOC_0000720601-mRNA-1;MSTRG.7102.1;MSTRG.7102.2
MSTRG.7126	ACOC_0000723201;ACOC_0000723301	ACOC_0000723201-mRNA-1;ACOC_0000723301-mRNA-1;MSTRG.7126.1;MSTRG.7126.4
MSTRG.7143	ACOC_0000725001;ACOC_0000725101	ACOC_0000725001-mRNA-1;ACOC_0000725101-mRNA-1;MSTRG.7143.1;MSTRG.7143.4
MSTRG.7151	ACOC_0000725901;ACOC_0000726001	ACOC_0000725901-mRNA-1;ACOC_0000726001-mRNA-1;MSTRG.7151.1
MSTRG.7152	ACOC_0000726101;ACOC_0000726201	ACOC_0000726101-mRNA-1;ACOC_0000726201-mRNA-1;MSTRG.7152.1
MSTRG.7177	ACOC_0000728801;ACOC_0000728901	ACOC_0000728801-mRNA-1;ACOC_0000728901-mRNA-1;MSTRG.7177.1;MSTRG.7177.2;MSTRG.7177.3
MSTRG.7180	ACOC_0000729201;ACOC_0000729301	ACOC_0000729201-mRNA-1;ACOC_0000729301-mRNA-1;MSTRG.7180.1
MSTRG.7187	ACOC_0000730101;ACOC_0000730201	ACOC_0000730101-mRNA-1;ACOC_0000730201-mRNA-1;MSTRG.7187.1
MSTRG.7190	ACOC_0000730601;ACOC_0000730701	ACOC_0000730601-mRNA-1;ACOC_0000730701-mRNA-1;MSTRG.7190.1;MSTRG.7190.2;MSTRG.7190.5
MSTRG.7198	ACOC_0000731601;ACOC_0000731701	ACOC_0000731601-mRNA-1;ACOC_0000731701-mRNA-1;MSTRG.7198.1
MSTRG.7202	ACOC_0000731901;ACOC_0000732001	ACOC_0000731901-mRNA-1;ACOC_0000732001-mRNA-1;MSTRG.7202.1;MSTRG.7202.2
MSTRG.7223	ACOC_0000734101;ACOC_0000734301	ACOC_0000734101-mRNA-1;ACOC_0000734301-mRNA-1;MSTRG.7223.2
MSTRG.7244	ACOC_0000736001;ACOC_0000736101	ACOC_0000736001-mRNA-1;ACOC_0000736101-mRNA-1;MSTRG.7244.1;MSTRG.7244.3;MSTRG.7244.4
MSTRG.7262	ACOC_0000737801;ACOC_0000737901	ACOC_0000737801-mRNA-1;ACOC_0000737901-mRNA-1;MSTRG.7262.1;MSTRG.7262.3
MSTRG.7274	ACOC_0000738901;ACOC_0000739001	ACOC_0000738901-mRNA-1;ACOC_0000739001-mRNA-1;MSTRG.7274.1
MSTRG.7288	ACOC_0000740201;ACOC_0000740301	ACOC_0000740201-mRNA-1;ACOC_0000740301-mRNA-1;MSTRG.7288.1
MSTRG.7294	ACOC_0000740701;ACOC_0000740801	ACOC_0000740701-mRNA-1;ACOC_0000740801-mRNA-1;MSTRG.7294.1
MSTRG.730	ACOC_0000076601;ACOC_0000076801	ACOC_0000076601-mRNA-1;ACOC_0000076801-mRNA-1;MSTRG.730.1
MSTRG.7333	ACOC_0000743801;ACOC_0000743901	ACOC_0000743801-mRNA-1;ACOC_0000743901-mRNA-1;MSTRG.7333.1
MSTRG.7345	ACOC_0000744901;ACOC_0000745001	ACOC_0000744901-mRNA-1;ACOC_0000745001-mRNA-1;MSTRG.7345.1
MSTRG.7349	ACOC_0000745401;ACOC_0000745501	ACOC_0000745401-mRNA-1;ACOC_0000745501-mRNA-1;MSTRG.7349.2
MSTRG.736	ACOC_0000077301;ACOC_0000077401	ACOC_0000077301-mRNA-1;ACOC_0000077401-mRNA-1;MSTRG.736.1;MSTRG.736.4
MSTRG.7377	ACOC_0000747901;ACOC_0000748001;ACOC_0000748101	ACOC_0000747901-mRNA-1;ACOC_0000748001-mRNA-1;ACOC_0000748101-mRNA-1;MSTRG.7377.2;MSTRG.7377.3;MSTRG.7377.6
MSTRG.7380	ACOC_0000748301;ACOC_0000748401	ACOC_0000748301-mRNA-1;ACOC_0000748401-mRNA-1;MSTRG.7380.1;MSTRG.7380.2
MSTRG.7385	ACOC_0000748901;ACOC_0000749001	ACOC_0000748901-mRNA-1;ACOC_0000749001-mRNA-1;MSTRG.7385.1
MSTRG.7396	ACOC_0000749901;ACOC_0000750001;ACOC_0000750101	ACOC_0000749901-mRNA-1;ACOC_0000750001-mRNA-1;ACOC_0000750101-mRNA-1;MSTRG.7396.1
MSTRG.7411	ACOC_0000751501;ACOC_0000751601	ACOC_0000751501-mRNA-1;ACOC_0000751601-mRNA-1;MSTRG.7411.1;MSTRG.7411.2
MSTRG.7442	ACOC_0000754201;ACOC_0000754301	ACOC_0000754201-mRNA-1;ACOC_0000754301-mRNA-1;MSTRG.7442.1
MSTRG.7457	ACOC_0000755701;ACOC_0000755801	ACOC_0000755701-mRNA-1;ACOC_0000755801-mRNA-1;MSTRG.7457.2;MSTRG.7457.3;MSTRG.7457.4
MSTRG.747	ACOC_0000078501;ACOC_0000078601	ACOC_0000078501-mRNA-1;ACOC_0000078601-mRNA-1;MSTRG.747.1
MSTRG.7479	ACOC_0000757901;ACOC_0000758101	ACOC_0000757901-mRNA-1;ACOC_0000758101-mRNA-1;MSTRG.7479.1;MSTRG.7479.3;MSTRG.7479.5
MSTRG.7484	ACOC_0000758201;ACOC_0000758301	ACOC_0000758201-mRNA-1;ACOC_0000758301-mRNA-1;MSTRG.7484.1
MSTRG.7486	ACOC_0000758501;ACOC_0000758601	ACOC_0000758501-mRNA-1;ACOC_0000758601-mRNA-1;MSTRG.7486.1
MSTRG.7490	ACOC_0000759101;ACOC_0000759201	ACOC_0000759101-mRNA-1;ACOC_0000759201-mRNA-1;MSTRG.7490.1;MSTRG.7490.2
MSTRG.750	ACOC_0000078901;ACOC_0000079001	ACOC_0000078901-mRNA-1;ACOC_0000079001-mRNA-1;MSTRG.750.1
MSTRG.7524	ACOC_0000762501;ACOC_0000762601	ACOC_0000762501-mRNA-1;ACOC_0000762601-mRNA-1;MSTRG.7524.1;MSTRG.7524.2
MSTRG.7532	ACOC_0000763201;ACOC_0000763301	ACOC_0000763201-mRNA-1;ACOC_0000763301-mRNA-1;MSTRG.7532.1
MSTRG.7549	ACOC_0000764901;ACOC_0000765001	ACOC_0000764901-mRNA-1;ACOC_0000765001-mRNA-1;MSTRG.7549.1
MSTRG.7550	ACOC_0000765101;ACOC_0000765201	ACOC_0000765101-mRNA-1;ACOC_0000765201-mRNA-1;MSTRG.7550.1
MSTRG.7552	ACOC_0000765501;ACOC_0000765601;ACOC_0000765701	ACOC_0000765501-mRNA-1;ACOC_0000765601-mRNA-1;ACOC_0000765701-mRNA-1;MSTRG.7552.1
MSTRG.7560	ACOC_0000766301;ACOC_0000766401	ACOC_0000766301-mRNA-1;ACOC_0000766401-mRNA-1;MSTRG.7560.1;MSTRG.7560.2
MSTRG.7561	ACOC_0000766501;ACOC_0000766601	ACOC_0000766501-mRNA-1;ACOC_0000766601-mRNA-1;MSTRG.7561.1
MSTRG.7586	ACOC_0000769001;ACOC_0000769101;ACOC_0000769201	ACOC_0000769001-mRNA-1;ACOC_0000769101-mRNA-1;ACOC_0000769201-mRNA-1;MSTRG.7586.1;MSTRG.7586.2
MSTRG.7598	ACOC_0000770401;ACOC_0000770501	ACOC_0000770401-mRNA-1;ACOC_0000770501-mRNA-1;MSTRG.7598.2
MSTRG.7606	ACOC_0000771601;ACOC_0000771701	ACOC_0000771601-mRNA-1;ACOC_0000771701-mRNA-1;MSTRG.7606.1
MSTRG.7616	ACOC_0000772601;ACOC_0000772701	ACOC_0000772601-mRNA-1;ACOC_0000772701-mRNA-1;MSTRG.7616.1
MSTRG.7630	ACOC_0000774101;ACOC_0000774201	ACOC_0000774101-mRNA-1;ACOC_0000774201-mRNA-1;MSTRG.7630.1
MSTRG.7633	ACOC_0000774501;ACOC_0000774601	ACOC_0000774501-mRNA-1;ACOC_0000774601-mRNA-1;MSTRG.7633.1
MSTRG.7634	ACOC_0000774701;ACOC_0000774801;ACOC_0000774901;ACOC_0000775001	ACOC_0000774701-mRNA-1;ACOC_0000774801-mRNA-1;ACOC_0000774901-mRNA-1;ACOC_0000775001-mRNA-1;MSTRG.7634.1
MSTRG.766	ACOC_0000080701;ACOC_0000080801;ACOC_0000080901	ACOC_0000080701-mRNA-1;ACOC_0000080801-mRNA-1;ACOC_0000080901-mRNA-1;MSTRG.766.1
MSTRG.7663	ACOC_0000777501;ACOC_0000777601	ACOC_0000777501-mRNA-1;ACOC_0000777601-mRNA-1;MSTRG.7663.1;MSTRG.7663.2
MSTRG.7679	ACOC_0000779001;ACOC_0000779101;ACOC_0000779201	ACOC_0000779001-mRNA-1;ACOC_0000779101-mRNA-1;ACOC_0000779201-mRNA-1;MSTRG.7679.1
MSTRG.768	ACOC_0000081101;ACOC_0000081201	ACOC_0000081101-mRNA-1;ACOC_0000081201-mRNA-1;MSTRG.768.1;MSTRG.768.2
MSTRG.7689	ACOC_0000780101;ACOC_0000780201	ACOC_0000780101-mRNA-1;ACOC_0000780201-mRNA-1;MSTRG.7689.1;MSTRG.7689.2
MSTRG.769	ACOC_0000081301;ACOC_0000081401	ACOC_0000081301-mRNA-1;ACOC_0000081401-mRNA-1;MSTRG.769.1;MSTRG.769.2;MSTRG.769.4
MSTRG.7708	ACOC_0000781701;ACOC_0000781801;ACOC_0000781901	ACOC_0000781701-mRNA-1;ACOC_0000781801-mRNA-1;ACOC_0000781901-mRNA-1;MSTRG.7708.1
MSTRG.7716	ACOC_0000782801;ACOC_0000782901;ACOC_0000783101;ACOC_0000783201	ACOC_0000782801-mRNA-1;ACOC_0000782901-mRNA-1;ACOC_0000783101-mRNA-1;ACOC_0000783201-mRNA-1;MSTRG.7716.1;MSTRG.7716.2
MSTRG.7722	ACOC_0000783701;ACOC_0000783801	ACOC_0000783701-mRNA-1;ACOC_0000783801-mRNA-1;MSTRG.7722.1
MSTRG.7738	ACOC_0000785201;ACOC_0000785301	ACOC_0000785201-mRNA-1;ACOC_0000785301-mRNA-1;MSTRG.7738.1
MSTRG.7744	ACOC_0000785801;ACOC_0000785901	ACOC_0000785801-mRNA-1;ACOC_0000785901-mRNA-1;MSTRG.7744.1;MSTRG.7744.2;MSTRG.7744.3
MSTRG.775	ACOC_0000082001;ACOC_0000082101;ACOC_0000082201	ACOC_0000082001-mRNA-1;ACOC_0000082101-mRNA-1;ACOC_0000082201-mRNA-1;MSTRG.775.1
MSTRG.7750	ACOC_0000786501;ACOC_0000786601	ACOC_0000786501-mRNA-1;ACOC_0000786601-mRNA-1;MSTRG.7750.1
MSTRG.7755	ACOC_0000787101;ACOC_0000787201	ACOC_0000787101-mRNA-1;ACOC_0000787201-mRNA-1;MSTRG.7755.1
MSTRG.7762	ACOC_0000787901;ACOC_0000788001	ACOC_0000787901-mRNA-1;ACOC_0000788001-mRNA-1;MSTRG.7762.1
MSTRG.7767	ACOC_0000788401;ACOC_0000788501;ACOC_0000788601	ACOC_0000788401-mRNA-1;ACOC_0000788501-mRNA-1;ACOC_0000788601-mRNA-1;MSTRG.7767.1;MSTRG.7767.2;MSTRG.7767.3;MSTRG.7767.5
MSTRG.778	ACOC_0000082501;ACOC_0000082701;ACOC_0000082801;ACOC_0000083001;ACOC_0000083101;ACOC_0000083201	ACOC_0000082501-mRNA-1;ACOC_0000082701-mRNA-1;ACOC_0000082801-mRNA-1;ACOC_0000083001-mRNA-1;ACOC_0000083101-mRNA-1;ACOC_0000083201-mRNA-1;MSTRG.778.1;MSTRG.778.5
MSTRG.7788	ACOC_0000790501;ACOC_0000790601;ACOC_0000790701	ACOC_0000790501-mRNA-1;ACOC_0000790601-mRNA-1;ACOC_0000790701-mRNA-1;MSTRG.7788.1
MSTRG.7819	ACOC_0000793901;ACOC_0000794001	ACOC_0000793901-mRNA-1;ACOC_0000794001-mRNA-1;MSTRG.7819.1;MSTRG.7819.2
MSTRG.7836	ACOC_0000795601;ACOC_0000795701	ACOC_0000795601-mRNA-1;ACOC_0000795701-mRNA-1;MSTRG.7836.1;MSTRG.7836.2;MSTRG.7836.5
MSTRG.784	ACOC_0000083601;ACOC_0000083801;ACOC_0000083901	ACOC_0000083601-mRNA-1;ACOC_0000083801-mRNA-1;ACOC_0000083901-mRNA-1;MSTRG.784.1;MSTRG.784.3
MSTRG.7840	ACOC_0000796101;ACOC_0000796201	ACOC_0000796101-mRNA-1;ACOC_0000796201-mRNA-1;MSTRG.7840.1;MSTRG.7840.2;MSTRG.7840.4;MSTRG.7840.5;MSTRG.7840.6;MSTRG.7840.7
MSTRG.7845	ACOC_0000796801;ACOC_0000796901	ACOC_0000796801-mRNA-1;ACOC_0000796901-mRNA-1;MSTRG.7845.1;MSTRG.7845.2
MSTRG.7858	ACOC_0000798201;ACOC_0000798301	ACOC_0000798201-mRNA-1;ACOC_0000798301-mRNA-1;MSTRG.7858.1
MSTRG.7862	ACOC_0000798701;ACOC_0000798801	ACOC_0000798701-mRNA-1;ACOC_0000798801-mRNA-1;MSTRG.7862.1;MSTRG.7862.3
MSTRG.7863	ACOC_0000798901;ACOC_0000799001	ACOC_0000798901-mRNA-1;ACOC_0000799001-mRNA-1;MSTRG.7863.2
MSTRG.7865	ACOC_0000799201;ACOC_0000799301	ACOC_0000799201-mRNA-1;ACOC_0000799301-mRNA-1;MSTRG.7865.1;MSTRG.7865.2
MSTRG.7896	ACOC_0000802001;ACOC_0000802101	ACOC_0000802001-mRNA-1;ACOC_0000802101-mRNA-1;MSTRG.7896.1
MSTRG.7905	ACOC_0000803001;ACOC_0000803101	ACOC_0000803001-mRNA-1;ACOC_0000803101-mRNA-1;MSTRG.7905.1;MSTRG.7905.3
MSTRG.7908	ACOC_0000803501;ACOC_0000803601;ACOC_0000803701	ACOC_0000803501-mRNA-1;ACOC_0000803601-mRNA-1;ACOC_0000803701-mRNA-1;MSTRG.7908.1;MSTRG.7908.4
MSTRG.7925	ACOC_0000805001;ACOC_0000805101	ACOC_0000805001-mRNA-1;ACOC_0000805101-mRNA-1;MSTRG.7925.1
MSTRG.7934	ACOC_0000805901;ACOC_0000806001	ACOC_0000805901-mRNA-1;ACOC_0000806001-mRNA-1;MSTRG.7934.1;MSTRG.7934.4
MSTRG.795	ACOC_0000084901;ACOC_0000085001	ACOC_0000084901-mRNA-1;ACOC_0000085001-mRNA-1;MSTRG.795.1;MSTRG.795.2;MSTRG.795.4
MSTRG.7958	ACOC_0000808001;ACOC_0000808101	ACOC_0000808001-mRNA-1;ACOC_0000808101-mRNA-1;MSTRG.7958.1;MSTRG.7958.2
MSTRG.7966	ACOC_0000808701;ACOC_0000808801	ACOC_0000808701-mRNA-1;ACOC_0000808801-mRNA-1;MSTRG.7966.1
MSTRG.7974	ACOC_0000809601;ACOC_0000809701	ACOC_0000809601-mRNA-1;ACOC_0000809701-mRNA-1;MSTRG.7974.1
MSTRG.7977	ACOC_0000809901;ACOC_0000810001	ACOC_0000809901-mRNA-1;ACOC_0000810001-mRNA-1;MSTRG.7977.1;MSTRG.7977.2
MSTRG.7982	ACOC_0000810501;ACOC_0000810601	ACOC_0000810501-mRNA-1;ACOC_0000810601-mRNA-1;MSTRG.7982.1
MSTRG.7990	ACOC_0000811301;ACOC_0000811401	ACOC_0000811301-mRNA-1;ACOC_0000811401-mRNA-1;MSTRG.7990.1
MSTRG.7995	ACOC_0000811901;ACOC_0000812001	ACOC_0000811901-mRNA-1;ACOC_0000812001-mRNA-1;MSTRG.7995.1;MSTRG.7995.4
MSTRG.8000	ACOC_0000812501;ACOC_0000812601	ACOC_0000812501-mRNA-1;ACOC_0000812601-mRNA-1;MSTRG.8000.1
MSTRG.8023	ACOC_0000815201;ACOC_0000815401;ACOC_0000815501	ACOC_0000815201-mRNA-1;ACOC_0000815401-mRNA-1;ACOC_0000815501-mRNA-1;MSTRG.8023.1;MSTRG.8023.2
MSTRG.8033	ACOC_0000816201;ACOC_0000816301	ACOC_0000816201-mRNA-1;ACOC_0000816301-mRNA-1;MSTRG.8033.1;MSTRG.8033.2
MSTRG.8036	ACOC_0000816601;ACOC_0000816701	ACOC_0000816601-mRNA-1;ACOC_0000816701-mRNA-1;MSTRG.8036.1;MSTRG.8036.3
MSTRG.8046	ACOC_0000818101;ACOC_0000818201	ACOC_0000818101-mRNA-1;ACOC_0000818201-mRNA-1;MSTRG.8046.1;MSTRG.8046.2
MSTRG.8058	ACOC_0000819401;ACOC_0000819601;ACOC_0000819801	ACOC_0000819401-mRNA-1;ACOC_0000819601-mRNA-1;ACOC_0000819801-mRNA-1;MSTRG.8058.2;MSTRG.8058.3;MSTRG.8058.6;MSTRG.8058.7
MSTRG.8064	ACOC_0000820101;ACOC_0000820201	ACOC_0000820101-mRNA-1;ACOC_0000820201-mRNA-1;MSTRG.8064.1
MSTRG.807	ACOC_0000086001;ACOC_0000086101	ACOC_0000086001-mRNA-1;ACOC_0000086101-mRNA-1;MSTRG.807.1
MSTRG.8070	ACOC_0000821001;ACOC_0000821101	ACOC_0000821001-mRNA-1;ACOC_0000821101-mRNA-1;MSTRG.8070.1;MSTRG.8070.2
MSTRG.8071	ACOC_0000821201;ACOC_0000821301	ACOC_0000821201-mRNA-1;ACOC_0000821301-mRNA-1;MSTRG.8071.2
MSTRG.8074	ACOC_0000821401;ACOC_0000821501	ACOC_0000821401-mRNA-1;ACOC_0000821501-mRNA-1;MSTRG.8074.2;MSTRG.8074.3
MSTRG.8081	ACOC_0000822201;ACOC_0000822301	ACOC_0000822201-mRNA-1;ACOC_0000822301-mRNA-1;MSTRG.8081.1
MSTRG.8096	ACOC_0000823801;ACOC_0000823901	ACOC_0000823801-mRNA-1;ACOC_0000823901-mRNA-1;MSTRG.8096.1
MSTRG.8099	ACOC_0000824101;ACOC_0000824201	ACOC_0000824101-mRNA-1;ACOC_0000824201-mRNA-1;MSTRG.8099.2
MSTRG.8102	ACOC_0000824501;ACOC_0000824601;ACOC_0000824701	ACOC_0000824501-mRNA-1;ACOC_0000824601-mRNA-1;ACOC_0000824701-mRNA-1;MSTRG.8102.1
MSTRG.8117	ACOC_0000826101;ACOC_0000826201	ACOC_0000826101-mRNA-1;ACOC_0000826201-mRNA-1;MSTRG.8117.1;MSTRG.8117.3
MSTRG.8121	ACOC_0000826601;ACOC_0000826701	ACOC_0000826601-mRNA-1;ACOC_0000826701-mRNA-1;MSTRG.8121.1;MSTRG.8121.2
MSTRG.8127	ACOC_0000827201;ACOC_0000827301	ACOC_0000827201-mRNA-1;ACOC_0000827301-mRNA-1;MSTRG.8127.1
MSTRG.8128	ACOC_0000827401;ACOC_0000827501	ACOC_0000827401-mRNA-1;ACOC_0000827501-mRNA-1;MSTRG.8128.1;MSTRG.8128.2
MSTRG.8132	ACOC_0000827801;ACOC_0000827901	ACOC_0000827801-mRNA-1;ACOC_0000827901-mRNA-1;MSTRG.8132.1
MSTRG.8143	ACOC_0000828701;ACOC_0000828801	ACOC_0000828701-mRNA-1;ACOC_0000828801-mRNA-1;MSTRG.8143.1;MSTRG.8143.4
MSTRG.8149	ACOC_0000829201;ACOC_0000829301	ACOC_0000829201-mRNA-1;ACOC_0000829301-mRNA-1;MSTRG.8149.1
MSTRG.8157	ACOC_0000830201;ACOC_0000830301	ACOC_0000830201-mRNA-1;ACOC_0000830301-mRNA-1;MSTRG.8157.1;MSTRG.8157.2
MSTRG.8165	ACOC_0000831101;ACOC_0000831201	ACOC_0000831101-mRNA-1;ACOC_0000831201-mRNA-1;MSTRG.8165.2
MSTRG.817	ACOC_0000087101;ACOC_0000087201	ACOC_0000087101-mRNA-1;ACOC_0000087201-mRNA-1;MSTRG.817.2
MSTRG.8191	ACOC_0000833601;ACOC_0000833701	ACOC_0000833601-mRNA-1;ACOC_0000833701-mRNA-1;MSTRG.8191.1
MSTRG.8194	ACOC_0000834101;ACOC_0000834201	ACOC_0000834101-mRNA-1;ACOC_0000834201-mRNA-1;MSTRG.8194.1;MSTRG.8194.2
MSTRG.8200	ACOC_0000834701;ACOC_0000834801	ACOC_0000834701-mRNA-1;ACOC_0000834801-mRNA-1;MSTRG.8200.1
MSTRG.8209	ACOC_0000835801;ACOC_0000835901;ACOC_0000836001	ACOC_0000835801-mRNA-1;ACOC_0000835901-mRNA-1;ACOC_0000836001-mRNA-1;MSTRG.8209.1;MSTRG.8209.2;MSTRG.8209.4
MSTRG.8211	ACOC_0000836201;ACOC_0000836301	ACOC_0000836201-mRNA-1;ACOC_0000836301-mRNA-1;MSTRG.8211.1
MSTRG.8255	ACOC_0000840201;ACOC_0000840301	ACOC_0000840201-mRNA-1;ACOC_0000840301-mRNA-1;MSTRG.8255.1
MSTRG.8258	ACOC_0000840601;ACOC_0000840701	ACOC_0000840601-mRNA-1;ACOC_0000840701-mRNA-1;MSTRG.8258.2
MSTRG.8272	ACOC_0000841901;ACOC_0000842001	ACOC_0000841901-mRNA-1;ACOC_0000842001-mRNA-1;MSTRG.8272.1
MSTRG.8298	ACOC_0000844601;ACOC_0000844701	ACOC_0000844601-mRNA-1;ACOC_0000844701-mRNA-1;MSTRG.8298.1
MSTRG.8301	ACOC_0000844801;ACOC_0000844901	ACOC_0000844801-mRNA-1;ACOC_0000844901-mRNA-1;MSTRG.8301.1
MSTRG.8316	ACOC_0000846301;ACOC_0000846401;ACOC_0000846501	ACOC_0000846301-mRNA-1;ACOC_0000846401-mRNA-1;ACOC_0000846501-mRNA-1;MSTRG.8316.2
MSTRG.8321	ACOC_0000847001;ACOC_0000847101	ACOC_0000847001-mRNA-1;ACOC_0000847101-mRNA-1;MSTRG.8321.1
MSTRG.8322	ACOC_0000847201;ACOC_0000847301;ACOC_0000847401;ACOC_0000847501	ACOC_0000847201-mRNA-1;ACOC_0000847301-mRNA-1;ACOC_0000847401-mRNA-1;ACOC_0000847501-mRNA-1;MSTRG.8322.1;MSTRG.8322.2
MSTRG.8348	ACOC_0000849701;ACOC_0000849801	ACOC_0000849701-mRNA-1;ACOC_0000849801-mRNA-1;MSTRG.8348.1
MSTRG.8366	ACOC_0000851401;ACOC_0000851501	ACOC_0000851401-mRNA-1;ACOC_0000851501-mRNA-1;MSTRG.8366.1;MSTRG.8366.2
MSTRG.8374	ACOC_0000852601;ACOC_0000852701;ACOC_0000852801	ACOC_0000852601-mRNA-1;ACOC_0000852701-mRNA-1;ACOC_0000852801-mRNA-1;MSTRG.8374.2;MSTRG.8374.3;MSTRG.8374.4
MSTRG.8380	ACOC_0000853601;ACOC_0000853701	ACOC_0000853601-mRNA-1;ACOC_0000853701-mRNA-1;MSTRG.8380.1
MSTRG.8384	ACOC_0000854101;ACOC_0000854201	ACOC_0000854101-mRNA-1;ACOC_0000854201-mRNA-1;MSTRG.8384.1
MSTRG.8392	ACOC_0000855101;ACOC_0000855201;ACOC_0000855301	ACOC_0000855101-mRNA-1;ACOC_0000855201-mRNA-1;ACOC_0000855301-mRNA-1;MSTRG.8392.1
MSTRG.840	ACOC_0000089101;ACOC_0000089201	ACOC_0000089101-mRNA-1;ACOC_0000089201-mRNA-1;MSTRG.840.1;MSTRG.840.2;MSTRG.840.3
MSTRG.8403	ACOC_0000856301;ACOC_0000856401	ACOC_0000856301-mRNA-1;ACOC_0000856401-mRNA-1;MSTRG.8403.1;MSTRG.8403.2
MSTRG.8404	ACOC_0000856501;ACOC_0000856601;ACOC_0000856701	ACOC_0000856501-mRNA-1;ACOC_0000856601-mRNA-1;ACOC_0000856701-mRNA-1;MSTRG.8404.2;MSTRG.8404.3;MSTRG.8404.4
MSTRG.8417	ACOC_0000857801;ACOC_0000857901	ACOC_0000857801-mRNA-1;ACOC_0000857901-mRNA-1;MSTRG.8417.1;MSTRG.8417.4
MSTRG.8420	ACOC_0000858201;ACOC_0000858301	ACOC_0000858201-mRNA-1;ACOC_0000858301-mRNA-1;MSTRG.8420.1
MSTRG.8425	ACOC_0000858801;ACOC_0000858901	ACOC_0000858801-mRNA-1;ACOC_0000858901-mRNA-1;MSTRG.8425.1;MSTRG.8425.2
MSTRG.8440	ACOC_0000860001;ACOC_0000860101	ACOC_0000860001-mRNA-1;ACOC_0000860101-mRNA-1;MSTRG.8440.1;MSTRG.8440.2
MSTRG.8444	ACOC_0000860401;ACOC_0000860501	ACOC_0000860401-mRNA-1;ACOC_0000860501-mRNA-1;MSTRG.8444.1
MSTRG.8470	ACOC_0000862901;ACOC_0000863001	ACOC_0000862901-mRNA-1;ACOC_0000863001-mRNA-1;MSTRG.8470.1;MSTRG.8470.3
MSTRG.8481	ACOC_0000864101;ACOC_0000864201;ACOC_0000864301	ACOC_0000864101-mRNA-1;ACOC_0000864201-mRNA-1;ACOC_0000864301-mRNA-1;MSTRG.8481.2;MSTRG.8481.3;MSTRG.8481.6
MSTRG.8483	ACOC_0000864501;ACOC_0000864601	ACOC_0000864501-mRNA-1;ACOC_0000864601-mRNA-1;MSTRG.8483.1;MSTRG.8483.2;MSTRG.8483.3;MSTRG.8483.5
MSTRG.8490	ACOC_0000865301;ACOC_0000865401	ACOC_0000865301-mRNA-1;ACOC_0000865401-mRNA-1;MSTRG.8490.1
MSTRG.8512	ACOC_0000867801;ACOC_0000867901	ACOC_0000867801-mRNA-1;ACOC_0000867901-mRNA-1;MSTRG.8512.1;MSTRG.8512.4
MSTRG.8532	ACOC_0000869601;ACOC_0000869701	ACOC_0000869601-mRNA-1;ACOC_0000869701-mRNA-1;MSTRG.8532.1
MSTRG.8584	ACOC_0000874501;ACOC_0000874601	ACOC_0000874501-mRNA-1;ACOC_0000874601-mRNA-1;MSTRG.8584.2;MSTRG.8584.3;MSTRG.8584.4;MSTRG.8584.6
MSTRG.8592	ACOC_0000875501;ACOC_0000875701	ACOC_0000875501-mRNA-1;ACOC_0000875701-mRNA-1;MSTRG.8592.1;MSTRG.8592.3
MSTRG.8602	ACOC_0000876401;ACOC_0000876501;ACOC_0000876601	ACOC_0000876401-mRNA-1;ACOC_0000876501-mRNA-1;ACOC_0000876601-mRNA-1;MSTRG.8602.1
MSTRG.8604	ACOC_0000876801;ACOC_0000876901	ACOC_0000876801-mRNA-1;ACOC_0000876901-mRNA-1;MSTRG.8604.1;MSTRG.8604.2;MSTRG.8604.3;MSTRG.8604.4
MSTRG.8605	ACOC_0000877001;ACOC_0000877101	ACOC_0000877001-mRNA-1;ACOC_0000877101-mRNA-1;MSTRG.8605.1;MSTRG.8605.2
MSTRG.8612	ACOC_0000877701;ACOC_0000877801	ACOC_0000877701-mRNA-1;ACOC_0000877801-mRNA-1;MSTRG.8612.1
MSTRG.8613	ACOC_0000877901;ACOC_0000878001;ACOC_0000878101	ACOC_0000877901-mRNA-1;ACOC_0000878001-mRNA-1;ACOC_0000878101-mRNA-1;MSTRG.8613.1
MSTRG.8628	ACOC_0000879601;ACOC_0000879701	ACOC_0000879601-mRNA-1;ACOC_0000879701-mRNA-1;MSTRG.8628.1
MSTRG.8629	ACOC_0000879801;ACOC_0000880101	ACOC_0000879801-mRNA-1;ACOC_0000880101-mRNA-1;MSTRG.8629.1
MSTRG.8647	ACOC_0000881801;ACOC_0000881901	ACOC_0000881801-mRNA-1;ACOC_0000881901-mRNA-1;MSTRG.8647.1
MSTRG.8669	ACOC_0000883701;ACOC_0000883801;ACOC_0000884101	ACOC_0000883701-mRNA-1;ACOC_0000883801-mRNA-1;ACOC_0000884101-mRNA-1;MSTRG.8669.1;MSTRG.8669.2;MSTRG.8669.3;MSTRG.8669.6
MSTRG.8672	ACOC_0000884301;ACOC_0000884401	ACOC_0000884301-mRNA-1;ACOC_0000884401-mRNA-1;MSTRG.8672.1
MSTRG.8698	ACOC_0000886701;ACOC_0000886801	ACOC_0000886701-mRNA-1;ACOC_0000886801-mRNA-1;MSTRG.8698.1
MSTRG.870	ACOC_0000091901;ACOC_0000092001	ACOC_0000091901-mRNA-1;ACOC_0000092001-mRNA-1;MSTRG.870.1;MSTRG.870.3
MSTRG.8722	ACOC_0000889301;ACOC_0000889401	ACOC_0000889301-mRNA-1;ACOC_0000889401-mRNA-1;MSTRG.8722.1
MSTRG.8730	ACOC_0000890101;ACOC_0000890201	ACOC_0000890101-mRNA-1;ACOC_0000890201-mRNA-1;MSTRG.8730.1
MSTRG.8734	ACOC_0000890501;ACOC_0000890601	ACOC_0000890501-mRNA-1;ACOC_0000890601-mRNA-1;MSTRG.8734.1;MSTRG.8734.3
MSTRG.8741	ACOC_0000891201;ACOC_0000891301	ACOC_0000891201-mRNA-1;ACOC_0000891301-mRNA-1;MSTRG.8741.1
MSTRG.8745	ACOC_0000891601;ACOC_0000891701	ACOC_0000891601-mRNA-1;ACOC_0000891701-mRNA-1;MSTRG.8745.2
MSTRG.8749	ACOC_0000892201;ACOC_0000892301	ACOC_0000892201-mRNA-1;ACOC_0000892301-mRNA-1;MSTRG.8749.1
MSTRG.8756	ACOC_0000893001;ACOC_0000893101	ACOC_0000893001-mRNA-1;ACOC_0000893101-mRNA-1;MSTRG.8756.1
MSTRG.8762	ACOC_0000893701;ACOC_0000893801	ACOC_0000893701-mRNA-1;ACOC_0000893801-mRNA-1;MSTRG.8762.2
MSTRG.8772	ACOC_0000894701;ACOC_0000894801	ACOC_0000894701-mRNA-1;ACOC_0000894801-mRNA-1;MSTRG.8772.2
MSTRG.8780	ACOC_0000895501;ACOC_0000895601	ACOC_0000895501-mRNA-1;ACOC_0000895601-mRNA-1;MSTRG.8780.1;MSTRG.8780.2;MSTRG.8780.3
MSTRG.8785	ACOC_0000896101;ACOC_0000896201	ACOC_0000896101-mRNA-1;ACOC_0000896201-mRNA-1;MSTRG.8785.1
MSTRG.8795	ACOC_0000897001;ACOC_0000897101;ACOC_0000897201	ACOC_0000897001-mRNA-1;ACOC_0000897101-mRNA-1;ACOC_0000897201-mRNA-1;MSTRG.8795.1
MSTRG.8796	ACOC_0000897301;ACOC_0000897401	ACOC_0000897301-mRNA-1;ACOC_0000897401-mRNA-1;MSTRG.8796.1
MSTRG.8797	ACOC_0000897601;ACOC_0000897701	ACOC_0000897601-mRNA-1;ACOC_0000897701-mRNA-1;MSTRG.8797.1;MSTRG.8797.2
MSTRG.8798	ACOC_0000897801;ACOC_0000897901	ACOC_0000897801-mRNA-1;ACOC_0000897901-mRNA-1;MSTRG.8798.1
MSTRG.8805	ACOC_0000898501;ACOC_0000898601;ACOC_0000898701	ACOC_0000898501-mRNA-1;ACOC_0000898601-mRNA-1;ACOC_0000898701-mRNA-1;MSTRG.8805.1
MSTRG.8806	ACOC_0000898801;ACOC_0000898901	ACOC_0000898801-mRNA-1;ACOC_0000898901-mRNA-1;MSTRG.8806.1;MSTRG.8806.2;MSTRG.8806.3
MSTRG.8811	ACOC_0000899401;ACOC_0000899501	ACOC_0000899401-mRNA-1;ACOC_0000899501-mRNA-1;MSTRG.8811.2;MSTRG.8811.3
MSTRG.8814	ACOC_0000899801;ACOC_0000899901	ACOC_0000899801-mRNA-1;ACOC_0000899901-mRNA-1;MSTRG.8814.1;MSTRG.8814.2;MSTRG.8814.3;MSTRG.8814.4
MSTRG.8815	ACOC_0000900001;ACOC_0000900101	ACOC_0000900001-mRNA-1;ACOC_0000900101-mRNA-1;MSTRG.8815.1
MSTRG.8823	ACOC_0000900601;ACOC_0000900701	ACOC_0000900601-mRNA-1;ACOC_0000900701-mRNA-1;MSTRG.8823.1
MSTRG.8828	ACOC_0000901601;ACOC_0000901701	ACOC_0000901601-mRNA-1;ACOC_0000901701-mRNA-1;MSTRG.8828.1;MSTRG.8828.2
MSTRG.8837	ACOC_0000902601;ACOC_0000902701	ACOC_0000902601-mRNA-1;ACOC_0000902701-mRNA-1;MSTRG.8837.1
MSTRG.8851	ACOC_0000903901;ACOC_0000904001	ACOC_0000903901-mRNA-1;ACOC_0000904001-mRNA-1;MSTRG.8851.1
MSTRG.8861	ACOC_0000905101;ACOC_0000905201	ACOC_0000905101-mRNA-1;ACOC_0000905201-mRNA-1;MSTRG.8861.1;MSTRG.8861.2
MSTRG.8862	ACOC_0000905301;ACOC_0000905401	ACOC_0000905301-mRNA-1;ACOC_0000905401-mRNA-1;MSTRG.8862.1;MSTRG.8862.2
MSTRG.8863	ACOC_0000905501;ACOC_0000905601	ACOC_0000905501-mRNA-1;ACOC_0000905601-mRNA-1;MSTRG.8863.1;MSTRG.8863.2;MSTRG.8863.4
MSTRG.8871	ACOC_0000906301;ACOC_0000906401	ACOC_0000906301-mRNA-1;ACOC_0000906401-mRNA-1;MSTRG.8871.2;MSTRG.8871.3;MSTRG.8871.4
MSTRG.8890	ACOC_0000908101;ACOC_0000908201	ACOC_0000908101-mRNA-1;ACOC_0000908201-mRNA-1;MSTRG.8890.2;MSTRG.8890.3
MSTRG.8893	ACOC_0000908501;ACOC_0000908601	ACOC_0000908501-mRNA-1;ACOC_0000908601-mRNA-1;MSTRG.8893.1
MSTRG.89	ACOC_0000010301;ACOC_0000010401	ACOC_0000010301-mRNA-1;ACOC_0000010401-mRNA-1;MSTRG.89.2;MSTRG.89.3;MSTRG.89.4;MSTRG.89.5
MSTRG.8901	ACOC_0000909401;ACOC_0000909501	ACOC_0000909401-mRNA-1;ACOC_0000909501-mRNA-1;MSTRG.8901.2;MSTRG.8901.3;MSTRG.8901.4
MSTRG.8922	ACOC_0000912101;ACOC_0000912201	ACOC_0000912101-mRNA-1;ACOC_0000912201-mRNA-1;MSTRG.8922.1;MSTRG.8922.4
MSTRG.8930	ACOC_0000912901;ACOC_0000913001	ACOC_0000912901-mRNA-1;ACOC_0000913001-mRNA-1;MSTRG.8930.1;MSTRG.8930.4
MSTRG.8931	ACOC_0000913101;ACOC_0000913201	ACOC_0000913101-mRNA-1;ACOC_0000913201-mRNA-1;MSTRG.8931.1
MSTRG.8965	ACOC_0000916701;ACOC_0000916801	ACOC_0000916701-mRNA-1;ACOC_0000916801-mRNA-1;MSTRG.8965.1
MSTRG.898	ACOC_0000094901;ACOC_0000095001	ACOC_0000094901-mRNA-1;ACOC_0000095001-mRNA-1;MSTRG.898.1
MSTRG.8981	ACOC_0000918601;ACOC_0000918701	ACOC_0000918601-mRNA-1;ACOC_0000918701-mRNA-1;MSTRG.8981.1;MSTRG.8981.2
MSTRG.8998	ACOC_0000920201;ACOC_0000920301	ACOC_0000920201-mRNA-1;ACOC_0000920301-mRNA-1;MSTRG.8998.1;MSTRG.8998.2
MSTRG.9004	ACOC_0000920901;ACOC_0000921001;ACOC_0000921101	ACOC_0000920901-mRNA-1;ACOC_0000921001-mRNA-1;ACOC_0000921101-mRNA-1;MSTRG.9004.1
MSTRG.9005	ACOC_0000921201;ACOC_0000921301	ACOC_0000921201-mRNA-1;ACOC_0000921301-mRNA-1;MSTRG.9005.1
MSTRG.9009	ACOC_0000921701;ACOC_0000921801	ACOC_0000921701-mRNA-1;ACOC_0000921801-mRNA-1;MSTRG.9009.2
MSTRG.903	ACOC_0000095601;ACOC_0000095701	ACOC_0000095601-mRNA-1;ACOC_0000095701-mRNA-1;MSTRG.903.1
MSTRG.9045	ACOC_0000925601;ACOC_0000925701	ACOC_0000925601-mRNA-1;ACOC_0000925701-mRNA-1;MSTRG.9045.2
MSTRG.9073	ACOC_0000928101;ACOC_0000928201	ACOC_0000928101-mRNA-1;ACOC_0000928201-mRNA-1;MSTRG.9073.1
MSTRG.9086	ACOC_0000929501;ACOC_0000929601	ACOC_0000929501-mRNA-1;ACOC_0000929601-mRNA-1;MSTRG.9086.1;MSTRG.9086.3
MSTRG.9087	ACOC_0000929701;ACOC_0000929801	ACOC_0000929701-mRNA-1;ACOC_0000929801-mRNA-1;MSTRG.9087.1
MSTRG.9088	ACOC_0000929901;ACOC_0000930001;ACOC_0000930201	ACOC_0000929901-mRNA-1;ACOC_0000930001-mRNA-1;ACOC_0000930201-mRNA-1;MSTRG.9088.1;MSTRG.9088.2
MSTRG.91	ACOC_0000010601;ACOC_0000010701	ACOC_0000010601-mRNA-1;ACOC_0000010701-mRNA-1;MSTRG.91.1
MSTRG.9113	ACOC_0000932501;ACOC_0000932601	ACOC_0000932501-mRNA-1;ACOC_0000932601-mRNA-1;MSTRG.9113.1;MSTRG.9113.2
MSTRG.912	ACOC_0000096601;ACOC_0000096701	ACOC_0000096601-mRNA-1;ACOC_0000096701-mRNA-1;MSTRG.912.1;MSTRG.912.2
MSTRG.9125	ACOC_0000933601;ACOC_0000933701	ACOC_0000933601-mRNA-1;ACOC_0000933701-mRNA-1;MSTRG.9125.2;MSTRG.9125.3
MSTRG.9129	ACOC_0000934101;ACOC_0000934201	ACOC_0000934101-mRNA-1;ACOC_0000934201-mRNA-1;MSTRG.9129.2
MSTRG.9141	ACOC_0000935201;ACOC_0000935301	ACOC_0000935201-mRNA-1;ACOC_0000935301-mRNA-1;MSTRG.9141.1
MSTRG.9148	ACOC_0000935801;ACOC_0000935901	ACOC_0000935801-mRNA-1;ACOC_0000935901-mRNA-1;MSTRG.9148.1
MSTRG.9156	ACOC_0000936401;ACOC_0000936601	ACOC_0000936401-mRNA-1;ACOC_0000936601-mRNA-1;MSTRG.9156.1;MSTRG.9156.3;MSTRG.9156.4
MSTRG.9160	ACOC_0000936901;ACOC_0000937001;ACOC_0000937101	ACOC_0000936901-mRNA-1;ACOC_0000937001-mRNA-1;ACOC_0000937101-mRNA-1;MSTRG.9160.1
MSTRG.9171	ACOC_0000938201;ACOC_0000938301	ACOC_0000938201-mRNA-1;ACOC_0000938301-mRNA-1;MSTRG.9171.1;MSTRG.9171.2
MSTRG.9186	ACOC_0000939301;ACOC_0000939401	ACOC_0000939301-mRNA-1;ACOC_0000939401-mRNA-1;MSTRG.9186.1;MSTRG.9186.2;MSTRG.9186.3
MSTRG.9191	ACOC_0000939801;ACOC_0000939901	ACOC_0000939801-mRNA-1;ACOC_0000939901-mRNA-1;MSTRG.9191.1
MSTRG.9192	ACOC_0000940001;ACOC_0000940101	ACOC_0000940001-mRNA-1;ACOC_0000940101-mRNA-1;MSTRG.9192.1
MSTRG.9202	ACOC_0000941101;ACOC_0000941201	ACOC_0000941101-mRNA-1;ACOC_0000941201-mRNA-1;MSTRG.9202.2;MSTRG.9202.3
MSTRG.9205	ACOC_0000941601;ACOC_0000941701	ACOC_0000941601-mRNA-1;ACOC_0000941701-mRNA-1;MSTRG.9205.1;MSTRG.9205.3;MSTRG.9205.5
MSTRG.9215	ACOC_0000942601;ACOC_0000942701	ACOC_0000942601-mRNA-1;ACOC_0000942701-mRNA-1;MSTRG.9215.1
MSTRG.9222	ACOC_0000943301;ACOC_0000943401	ACOC_0000943301-mRNA-1;ACOC_0000943401-mRNA-1;MSTRG.9222.1
MSTRG.923	ACOC_0000097701;ACOC_0000097801	ACOC_0000097701-mRNA-1;ACOC_0000097801-mRNA-1;MSTRG.923.1;MSTRG.923.2;MSTRG.923.3
MSTRG.9237	ACOC_0000944701;ACOC_0000944801	ACOC_0000944701-mRNA-1;ACOC_0000944801-mRNA-1;MSTRG.9237.1;MSTRG.9237.2
MSTRG.9250	ACOC_0000946001;ACOC_0000946101	ACOC_0000946001-mRNA-1;ACOC_0000946101-mRNA-1;MSTRG.9250.1;MSTRG.9250.3;MSTRG.9250.4;MSTRG.9250.5
MSTRG.9262	ACOC_0000947201;ACOC_0000947301	ACOC_0000947201-mRNA-1;ACOC_0000947301-mRNA-1;MSTRG.9262.1;MSTRG.9262.2
MSTRG.9292	ACOC_0000950001;ACOC_0000950101	ACOC_0000950001-mRNA-1;ACOC_0000950101-mRNA-1;MSTRG.9292.1
MSTRG.9300	ACOC_0000950801;ACOC_0000950901	ACOC_0000950801-mRNA-1;ACOC_0000950901-mRNA-1;MSTRG.9300.1
MSTRG.931	ACOC_0000098601;ACOC_0000098701	ACOC_0000098601-mRNA-1;ACOC_0000098701-mRNA-1;MSTRG.931.1;MSTRG.931.2
MSTRG.9314	ACOC_0000952301;ACOC_0000952401	ACOC_0000952301-mRNA-1;ACOC_0000952401-mRNA-1;MSTRG.9314.1
MSTRG.9332	ACOC_0000954201;ACOC_0000954301	ACOC_0000954201-mRNA-1;ACOC_0000954301-mRNA-1;MSTRG.9332.1;MSTRG.9332.2
MSTRG.9348	ACOC_0000956001;ACOC_0000956101	ACOC_0000956001-mRNA-1;ACOC_0000956101-mRNA-1;MSTRG.9348.1
MSTRG.9361	ACOC_0000957401;ACOC_0000957501	ACOC_0000957401-mRNA-1;ACOC_0000957501-mRNA-1;MSTRG.9361.1;MSTRG.9361.2
MSTRG.9373	ACOC_0000958701;ACOC_0000958801	ACOC_0000958701-mRNA-1;ACOC_0000958801-mRNA-1;MSTRG.9373.2
MSTRG.9383	ACOC_0000959601;ACOC_0000959701	ACOC_0000959601-mRNA-1;ACOC_0000959701-mRNA-1;MSTRG.9383.1;MSTRG.9383.4
MSTRG.9421	ACOC_0000963301;ACOC_0000963401	ACOC_0000963301-mRNA-1;ACOC_0000963401-mRNA-1;MSTRG.9421.2;MSTRG.9421.3
MSTRG.9441	ACOC_0000965101;ACOC_0000965201	ACOC_0000965101-mRNA-1;ACOC_0000965201-mRNA-1;MSTRG.9441.1
MSTRG.9456	ACOC_0000966801;ACOC_0000966901	ACOC_0000966801-mRNA-1;ACOC_0000966901-mRNA-1;MSTRG.9456.1
MSTRG.9461	ACOC_0000967701;ACOC_0000967801	ACOC_0000967701-mRNA-1;ACOC_0000967801-mRNA-1;MSTRG.9461.1
MSTRG.9467	ACOC_0000968301;ACOC_0000968401	ACOC_0000968301-mRNA-1;ACOC_0000968401-mRNA-1;MSTRG.9467.1;MSTRG.9467.2
MSTRG.9479	ACOC_0000969401;ACOC_0000969501	ACOC_0000969401-mRNA-1;ACOC_0000969501-mRNA-1;MSTRG.9479.1;MSTRG.9479.2
MSTRG.948	ACOC_0000100301;ACOC_0000100401	ACOC_0000100301-mRNA-1;ACOC_0000100401-mRNA-1;MSTRG.948.1
MSTRG.9497	ACOC_0000971101;ACOC_0000971201;ACOC_0000971301	ACOC_0000971101-mRNA-1;ACOC_0000971201-mRNA-1;ACOC_0000971301-mRNA-1;MSTRG.9497.1
MSTRG.9501	ACOC_0000971901;ACOC_0000972101	ACOC_0000971901-mRNA-1;ACOC_0000972101-mRNA-1;MSTRG.9501.1;MSTRG.9501.3;MSTRG.9501.4
MSTRG.9503	ACOC_0000972201;ACOC_0000972301	ACOC_0000972201-mRNA-1;ACOC_0000972301-mRNA-1;MSTRG.9503.2
MSTRG.9518	ACOC_0000973701;ACOC_0000973801;ACOC_0000973901	ACOC_0000973701-mRNA-1;ACOC_0000973801-mRNA-1;ACOC_0000973901-mRNA-1;MSTRG.9518.1;MSTRG.9518.2
MSTRG.9520	ACOC_0000974101;ACOC_0000974201;ACOC_0000974301	ACOC_0000974101-mRNA-1;ACOC_0000974201-mRNA-1;ACOC_0000974301-mRNA-1;MSTRG.9520.1
MSTRG.9521	ACOC_0000974401;ACOC_0000974501	ACOC_0000974401-mRNA-1;ACOC_0000974501-mRNA-1;MSTRG.9521.1;MSTRG.9521.2
MSTRG.9524	ACOC_0000974801;ACOC_0000974901;ACOC_0000975001	ACOC_0000974801-mRNA-1;ACOC_0000974901-mRNA-1;ACOC_0000975001-mRNA-1;MSTRG.9524.2;MSTRG.9524.3
MSTRG.9537	ACOC_0000976101;ACOC_0000976201	ACOC_0000976101-mRNA-1;ACOC_0000976201-mRNA-1;MSTRG.9537.1
MSTRG.9544	ACOC_0000976501;ACOC_0000976601;ACOC_0000976701	ACOC_0000976501-mRNA-1;ACOC_0000976601-mRNA-1;ACOC_0000976701-mRNA-1;MSTRG.9544.1;MSTRG.9544.2;MSTRG.9544.3
MSTRG.9545	ACOC_0000976801;ACOC_0000977001	ACOC_0000976801-mRNA-1;ACOC_0000977001-mRNA-1;MSTRG.9545.1
MSTRG.9548	ACOC_0000977201;ACOC_0000977301	ACOC_0000977201-mRNA-1;ACOC_0000977301-mRNA-1;MSTRG.9548.1;MSTRG.9548.3;MSTRG.9548.5
MSTRG.9552	ACOC_0000977801;ACOC_0000977901	ACOC_0000977801-mRNA-1;ACOC_0000977901-mRNA-1;MSTRG.9552.1
MSTRG.9554	ACOC_0000978101;ACOC_0000978201	ACOC_0000978101-mRNA-1;ACOC_0000978201-mRNA-1;MSTRG.9554.1;MSTRG.9554.2;MSTRG.9554.3;MSTRG.9554.4
MSTRG.9566	ACOC_0000979301;ACOC_0000979401	ACOC_0000979301-mRNA-1;ACOC_0000979401-mRNA-1;MSTRG.9566.2
MSTRG.9587	ACOC_0000981001;ACOC_0000981101	ACOC_0000981001-mRNA-1;ACOC_0000981101-mRNA-1;MSTRG.9587.1;MSTRG.9587.2
MSTRG.959	ACOC_0000101701;ACOC_0000101801	ACOC_0000101701-mRNA-1;ACOC_0000101801-mRNA-1;MSTRG.959.1
MSTRG.96	ACOC_0000011201;ACOC_0000011301	ACOC_0000011201-mRNA-1;ACOC_0000011301-mRNA-1;MSTRG.96.1;MSTRG.96.2;MSTRG.96.3
MSTRG.9613	ACOC_0000983701;ACOC_0000983801	ACOC_0000983701-mRNA-1;ACOC_0000983801-mRNA-1;MSTRG.9613.1
MSTRG.9618	ACOC_0000984301;ACOC_0000984401;ACOC_0000984501	ACOC_0000984301-mRNA-1;ACOC_0000984401-mRNA-1;ACOC_0000984501-mRNA-1;MSTRG.9618.1
MSTRG.9625	ACOC_0000985301;ACOC_0000985401;ACOC_0000985601;ACOC_0000985801	ACOC_0000985301-mRNA-1;ACOC_0000985401-mRNA-1;ACOC_0000985601-mRNA-1;ACOC_0000985801-mRNA-1;MSTRG.9625.1;MSTRG.9625.2;MSTRG.9625.3;MSTRG.9625.8
MSTRG.965	ACOC_0000102301;ACOC_0000102401	ACOC_0000102301-mRNA-1;ACOC_0000102401-mRNA-1;MSTRG.965.2
MSTRG.9678	ACOC_0000990801;ACOC_0000990901	ACOC_0000990801-mRNA-1;ACOC_0000990901-mRNA-1;MSTRG.9678.1;MSTRG.9678.2
MSTRG.9687	ACOC_0000991601;ACOC_0000991701	ACOC_0000991601-mRNA-1;ACOC_0000991701-mRNA-1;MSTRG.9687.1;MSTRG.9687.2;MSTRG.9687.3
MSTRG.9692	ACOC_0000992101;ACOC_0000992201	ACOC_0000992101-mRNA-1;ACOC_0000992201-mRNA-1;MSTRG.9692.2
MSTRG.9694	ACOC_0000992401;ACOC_0000992601	ACOC_0000992401-mRNA-1;ACOC_0000992601-mRNA-1;MSTRG.9694.1
MSTRG.9697	ACOC_0000992801;ACOC_0000992901;ACOC_0000993001	ACOC_0000992801-mRNA-1;ACOC_0000992901-mRNA-1;ACOC_0000993001-mRNA-1;MSTRG.9697.1;MSTRG.9697.2
MSTRG.970	ACOC_0000102901;ACOC_0000103001	ACOC_0000102901-mRNA-1;ACOC_0000103001-mRNA-1;MSTRG.970.1
MSTRG.9700	ACOC_0000993401;ACOC_0000993501	ACOC_0000993401-mRNA-1;ACOC_0000993501-mRNA-1;MSTRG.9700.1
MSTRG.9702	ACOC_0000993701;ACOC_0000993801;ACOC_0000993901	ACOC_0000993701-mRNA-1;ACOC_0000993801-mRNA-1;ACOC_0000993901-mRNA-1;MSTRG.9702.1;MSTRG.9702.4
MSTRG.9703	ACOC_0000994001;ACOC_0000994101	ACOC_0000994001-mRNA-1;ACOC_0000994101-mRNA-1;MSTRG.9703.1
MSTRG.9715	ACOC_0000995001;ACOC_0000995101	ACOC_0000995001-mRNA-1;ACOC_0000995101-mRNA-1;MSTRG.9715.1
MSTRG.9738	ACOC_0000997201;ACOC_0000997301	ACOC_0000997201-mRNA-1;ACOC_0000997301-mRNA-1;MSTRG.9738.1
MSTRG.9753	ACOC_0000998501;ACOC_0000998601	ACOC_0000998501-mRNA-1;ACOC_0000998601-mRNA-1;MSTRG.9753.1
MSTRG.9757	ACOC_0000998901;ACOC_0000999001	ACOC_0000998901-mRNA-1;ACOC_0000999001-mRNA-1;MSTRG.9757.1;MSTRG.9757.2
MSTRG.9775	ACOC_0001000701;ACOC_0001000801	ACOC_0001000701-mRNA-1;ACOC_0001000801-mRNA-1;MSTRG.9775.2
MSTRG.9786	ACOC_0001001301;ACOC_0001001401	ACOC_0001001301-mRNA-1;ACOC_0001001401-mRNA-1;MSTRG.9786.1;MSTRG.9786.3
MSTRG.9810	ACOC_0001003601;ACOC_0001003701	ACOC_0001003601-mRNA-1;ACOC_0001003701-mRNA-1;MSTRG.9810.1
MSTRG.9824	ACOC_0001005101;ACOC_0001005201	ACOC_0001005101-mRNA-1;ACOC_0001005201-mRNA-1;MSTRG.9824.1
MSTRG.9829	ACOC_0001005501;ACOC_0001005601	ACOC_0001005501-mRNA-1;ACOC_0001005601-mRNA-1;MSTRG.9829.1
MSTRG.9869	ACOC_0001009601;ACOC_0001009801	ACOC_0001009601-mRNA-1;ACOC_0001009801-mRNA-1;MSTRG.9869.1;MSTRG.9869.3
MSTRG.9876	ACOC_0001010301;ACOC_0001010401	ACOC_0001010301-mRNA-1;ACOC_0001010401-mRNA-1;MSTRG.9876.1
MSTRG.988	ACOC_0000104701;ACOC_0000104801	ACOC_0000104701-mRNA-1;ACOC_0000104801-mRNA-1;MSTRG.988.2
MSTRG.9880	ACOC_0001010901;ACOC_0001011001	ACOC_0001010901-mRNA-1;ACOC_0001011001-mRNA-1;MSTRG.9880.1
MSTRG.9885	ACOC_0001011501;ACOC_0001011601	ACOC_0001011501-mRNA-1;ACOC_0001011601-mRNA-1;MSTRG.9885.2;MSTRG.9885.3
MSTRG.9886	ACOC_0001011701;ACOC_0001011801;ACOC_0001011901	ACOC_0001011701-mRNA-1;ACOC_0001011801-mRNA-1;ACOC_0001011901-mRNA-1;MSTRG.9886.1
MSTRG.9895	ACOC_0001012801;ACOC_0001013001	ACOC_0001012801-mRNA-1;ACOC_0001013001-mRNA-1;MSTRG.9895.1;MSTRG.9895.2
MSTRG.9897	ACOC_0001013101;ACOC_0001013201	ACOC_0001013101-mRNA-1;ACOC_0001013201-mRNA-1;MSTRG.9897.1
MSTRG.9914	ACOC_0001014701;ACOC_0001014801	ACOC_0001014701-mRNA-1;ACOC_0001014801-mRNA-1;MSTRG.9914.2
MSTRG.9917	ACOC_0001015001;ACOC_0001015101	ACOC_0001015001-mRNA-1;ACOC_0001015101-mRNA-1;MSTRG.9917.1
MSTRG.9920	ACOC_0001015301;ACOC_0001015401;ACOC_0001015501	ACOC_0001015301-mRNA-1;ACOC_0001015401-mRNA-1;ACOC_0001015501-mRNA-1;MSTRG.9920.1
MSTRG.9925	ACOC_0001016001;ACOC_0001016101	ACOC_0001016001-mRNA-1;ACOC_0001016101-mRNA-1;MSTRG.9925.1;MSTRG.9925.2
MSTRG.9931	ACOC_0001016401;ACOC_0001016501;ACOC_0001016601	ACOC_0001016401-mRNA-1;ACOC_0001016501-mRNA-1;ACOC_0001016601-mRNA-1;MSTRG.9931.1;MSTRG.9931.2;MSTRG.9931.5;MSTRG.9931.6;MSTRG.9931.7;MSTRG.9931.8
MSTRG.9936	ACOC_0001017101;ACOC_0001017201	ACOC_0001017101-mRNA-1;ACOC_0001017201-mRNA-1;MSTRG.9936.1
MSTRG.994	ACOC_0000105401;ACOC_0000105501	ACOC_0000105401-mRNA-1;ACOC_0000105501-mRNA-1;MSTRG.994.1
MSTRG.995	ACOC_0000105601;ACOC_0000105701	ACOC_0000105601-mRNA-1;ACOC_0000105701-mRNA-1;MSTRG.995.2
MSTRG.9951	ACOC_0001018601;ACOC_0001018701	ACOC_0001018601-mRNA-1;ACOC_0001018701-mRNA-1;MSTRG.9951.1
MSTRG.9956	ACOC_0001019201;ACOC_0001019301	ACOC_0001019201-mRNA-1;ACOC_0001019301-mRNA-1;MSTRG.9956.1;MSTRG.9956.2
MSTRG.997	ACOC_0000105901;ACOC_0000106001	ACOC_0000105901-mRNA-1;ACOC_0000106001-mRNA-1;MSTRG.997.1;MSTRG.997.2;MSTRG.997.4
MSTRG.9979	ACOC_0001021401;ACOC_0001021501	ACOC_0001021401-mRNA-1;ACOC_0001021501-mRNA-1;MSTRG.9979.1
MSTRG.999	ACOC_0000106301;ACOC_0000106501	ACOC_0000106301-mRNA-1;ACOC_0000106501-mRNA-1;MSTRG.999.1;MSTRG.999.2
