# Supplementary material for: Identification of Novel Genes and Proteoforms in Angiostrongylus costaricensis through a Proteogenomic Approach
Source: Pathogens. 2022 Oct 31;11(11):1273. doi: 10.3390/pathogens11111273 (PMC9694666; doi:10.3390/pathogens11111273)
Supplement: Supplementary file 1 [file pathogens-11-01273-s001.zip › Supplemental_Data_S4.xlsx]

## Sheet: Shared genes
Supplemental Data S4. Shared genes
New gene IDs	Old Gene IDs	IDs of overlaped transcripts
MSTRG.1	ACOC_0000000001	ACOC_0000000001-mRNA-1;MSTRG.1.1
MSTRG.10	ACOC_0000001001	ACOC_0000001001-mRNA-1;MSTRG.10.1
MSTRG.100	ACOC_0000011901	ACOC_0000011901-mRNA-1;MSTRG.100.1
MSTRG.10002	ACOC_0001023601	ACOC_0001023601-mRNA-1;MSTRG.10002.1
MSTRG.10004	ACOC_0001023801	ACOC_0001023801-mRNA-1;MSTRG.10004.1
MSTRG.10009	ACOC_0001024301	ACOC_0001024301-mRNA-1;MSTRG.10009.1
MSTRG.10010	ACOC_0001024501	ACOC_0001024501-mRNA-1;MSTRG.10010.1
MSTRG.10011	ACOC_0001024601	ACOC_0001024601-mRNA-1;MSTRG.10011.1
MSTRG.10012	ACOC_0001024701	ACOC_0001024701-mRNA-1;MSTRG.10012.1;MSTRG.10012.3
MSTRG.10013	ACOC_0001024801	ACOC_0001024801-mRNA-1;MSTRG.10013.2;MSTRG.10013.3
MSTRG.10014	ACOC_0001024901	ACOC_0001024901-mRNA-1;MSTRG.10014.1
MSTRG.10016	ACOC_0001025301	ACOC_0001025301-mRNA-1;MSTRG.10016.1
MSTRG.10017	ACOC_0001025401	ACOC_0001025401-mRNA-1;MSTRG.10017.1
MSTRG.10019	ACOC_0001025601	ACOC_0001025601-mRNA-1;MSTRG.10019.1
MSTRG.1002	ACOC_0000106801	ACOC_0000106801-mRNA-1;MSTRG.1002.1
MSTRG.10021	ACOC_0001025901	ACOC_0001025901-mRNA-1;MSTRG.10021.1
MSTRG.10022	ACOC_0001026001	ACOC_0001026001-mRNA-1;MSTRG.10022.1
MSTRG.10023	ACOC_0001026201	ACOC_0001026201-mRNA-1;MSTRG.10023.1
MSTRG.10024	ACOC_0001026301	ACOC_0001026301-mRNA-1;MSTRG.10024.2;MSTRG.10024.3
MSTRG.10025	ACOC_0001026401	ACOC_0001026401-mRNA-1;MSTRG.10025.1;MSTRG.10025.2
MSTRG.10027	ACOC_0001026501	ACOC_0001026501-mRNA-1;MSTRG.10027.1
MSTRG.10029	ACOC_0001026801	ACOC_0001026801-mRNA-1;MSTRG.10029.1
MSTRG.1003	ACOC_0000106901	ACOC_0000106901-mRNA-1;MSTRG.1003.1
MSTRG.10030	ACOC_0001026901	ACOC_0001026901-mRNA-1;MSTRG.10030.1
MSTRG.10031	ACOC_0001027101	ACOC_0001027101-mRNA-1;MSTRG.10031.1;MSTRG.10031.2
MSTRG.10032	ACOC_0001027201	ACOC_0001027201-mRNA-1;MSTRG.10032.1;MSTRG.10032.2
MSTRG.10033	ACOC_0001027301	ACOC_0001027301-mRNA-1;MSTRG.10033.1
MSTRG.10034	ACOC_0001027401	ACOC_0001027401-mRNA-1;MSTRG.10034.1
MSTRG.10036	ACOC_0001027501	ACOC_0001027501-mRNA-1;MSTRG.10036.1
MSTRG.10038	ACOC_0001027801	ACOC_0001027801-mRNA-1;MSTRG.10038.1
MSTRG.10039	ACOC_0001028101	ACOC_0001028101-mRNA-1;MSTRG.10039.1
MSTRG.1004	ACOC_0000107001	ACOC_0000107001-mRNA-1;MSTRG.1004.2
MSTRG.10042	ACOC_0001028301	ACOC_0001028301-mRNA-1;MSTRG.10042.1
MSTRG.10043	ACOC_0001028401	ACOC_0001028401-mRNA-1;MSTRG.10043.1;MSTRG.10043.2
MSTRG.10045	ACOC_0001028501	ACOC_0001028501-mRNA-1;MSTRG.10045.1
MSTRG.10046	ACOC_0001028601	ACOC_0001028601-mRNA-1;MSTRG.10046.1
MSTRG.10048	ACOC_0001028701	ACOC_0001028701-mRNA-1;MSTRG.10048.1
MSTRG.10049	ACOC_0001028801	ACOC_0001028801-mRNA-1;MSTRG.10049.1
MSTRG.1005	ACOC_0000107101	ACOC_0000107101-mRNA-1;MSTRG.1005.1
MSTRG.10050	ACOC_0001028901	ACOC_0001028901-mRNA-1;MSTRG.10050.1;MSTRG.10050.2
MSTRG.10053	ACOC_0001029201	ACOC_0001029201-mRNA-1;MSTRG.10053.1
MSTRG.10054	ACOC_0001029301	ACOC_0001029301-mRNA-1;MSTRG.10054.1
MSTRG.10057	ACOC_0001029601	ACOC_0001029601-mRNA-1;MSTRG.10057.1
MSTRG.10058	ACOC_0001029701	ACOC_0001029701-mRNA-1;MSTRG.10058.1
MSTRG.10060	ACOC_0001029901	ACOC_0001029901-mRNA-1;MSTRG.10060.1
MSTRG.10061	ACOC_0001030001	ACOC_0001030001-mRNA-1;MSTRG.10061.1;MSTRG.10061.2
MSTRG.10064	ACOC_0001030301	ACOC_0001030301-mRNA-1;MSTRG.10064.1
MSTRG.10065	ACOC_0001030401	ACOC_0001030401-mRNA-1;MSTRG.10065.1;MSTRG.10065.2;MSTRG.10065.4
MSTRG.10066	ACOC_0001030501	ACOC_0001030501-mRNA-1;MSTRG.10066.1
MSTRG.10067	ACOC_0001030601	ACOC_0001030601-mRNA-1;MSTRG.10067.1
MSTRG.10068	ACOC_0001030701	ACOC_0001030701-mRNA-1;MSTRG.10068.1;MSTRG.10068.2
MSTRG.1007	ACOC_0000107401	ACOC_0000107401-mRNA-1;MSTRG.1007.1
MSTRG.10071	ACOC_0001031001	ACOC_0001031001-mRNA-1;MSTRG.10071.1;MSTRG.10071.2
MSTRG.10073	ACOC_0001031301	ACOC_0001031301-mRNA-1;MSTRG.10073.1
MSTRG.10074	ACOC_0001031401	ACOC_0001031401-mRNA-1;MSTRG.10074.1
MSTRG.10075	ACOC_0001031501	ACOC_0001031501-mRNA-1;MSTRG.10075.1
MSTRG.10076	ACOC_0001031701	ACOC_0001031701-mRNA-1;MSTRG.10076.1
MSTRG.10078	ACOC_0001032101	ACOC_0001032101-mRNA-1;MSTRG.10078.1;MSTRG.10078.2
MSTRG.1008	ACOC_0000107501	ACOC_0000107501-mRNA-1;MSTRG.1008.1
MSTRG.10080	ACOC_0001032301	ACOC_0001032301-mRNA-1;MSTRG.10080.1;MSTRG.10080.2
MSTRG.10081	ACOC_0001032401	ACOC_0001032401-mRNA-1;MSTRG.10081.1
MSTRG.10082	ACOC_0001032501	ACOC_0001032501-mRNA-1;MSTRG.10082.1
MSTRG.10086	ACOC_0001032901	ACOC_0001032901-mRNA-1;MSTRG.10086.1;MSTRG.10086.2
MSTRG.10087	ACOC_0001033001	ACOC_0001033001-mRNA-1;MSTRG.10087.2
MSTRG.10088	ACOC_0001033101	ACOC_0001033101-mRNA-1;MSTRG.10088.1
MSTRG.10089	ACOC_0001033201	ACOC_0001033201-mRNA-1;MSTRG.10089.1
MSTRG.10090	ACOC_0001033301	ACOC_0001033301-mRNA-1;MSTRG.10090.1
MSTRG.10091	ACOC_0001033501	ACOC_0001033501-mRNA-1;MSTRG.10091.1
MSTRG.10093	ACOC_0001033601	ACOC_0001033601-mRNA-1;MSTRG.10093.1
MSTRG.10095	ACOC_0001033901	ACOC_0001033901-mRNA-1;MSTRG.10095.1
MSTRG.10097	ACOC_0001034201	ACOC_0001034201-mRNA-1;MSTRG.10097.1
MSTRG.10098	ACOC_0001034301	ACOC_0001034301-mRNA-1;MSTRG.10098.2
MSTRG.10099	ACOC_0001034401	ACOC_0001034401-mRNA-1;MSTRG.10099.1
MSTRG.101	ACOC_0000012101	ACOC_0000012101-mRNA-1;MSTRG.101.2
MSTRG.1010	ACOC_0000107801	ACOC_0000107801-mRNA-1;MSTRG.1010.1
MSTRG.10100	ACOC_0001034501	ACOC_0001034501-mRNA-1;MSTRG.10100.1;MSTRG.10100.3
MSTRG.10103	ACOC_0001034801	ACOC_0001034801-mRNA-1;MSTRG.10103.1
MSTRG.10104	ACOC_0001034901	ACOC_0001034901-mRNA-1;MSTRG.10104.1
MSTRG.10105	ACOC_0001035001	ACOC_0001035001-mRNA-1;MSTRG.10105.1;MSTRG.10105.2
MSTRG.10107	ACOC_0001035201	ACOC_0001035201-mRNA-1;MSTRG.10107.1
MSTRG.10108	ACOC_0001035301	ACOC_0001035301-mRNA-1;MSTRG.10108.1
MSTRG.10111	ACOC_0001035701	ACOC_0001035701-mRNA-1;MSTRG.10111.1
MSTRG.10112	ACOC_0001035801	ACOC_0001035801-mRNA-1;MSTRG.10112.1
MSTRG.10113	ACOC_0001035901	ACOC_0001035901-mRNA-1;MSTRG.10113.1;MSTRG.10113.3
MSTRG.10114	ACOC_0001036001	ACOC_0001036001-mRNA-1;MSTRG.10114.2
MSTRG.10115	ACOC_0001036101	ACOC_0001036101-mRNA-1;MSTRG.10115.1;MSTRG.10115.3
MSTRG.10116	ACOC_0001036201	ACOC_0001036201-mRNA-1;MSTRG.10116.1
MSTRG.10118	ACOC_0001036301	ACOC_0001036301-mRNA-1;MSTRG.10118.2;MSTRG.10118.3
MSTRG.10119	ACOC_0001036401	ACOC_0001036401-mRNA-1;MSTRG.10119.1;MSTRG.10119.2;MSTRG.10119.3
MSTRG.1012	ACOC_0000108001	ACOC_0000108001-mRNA-1;MSTRG.1012.1
MSTRG.10121	ACOC_0001036601	ACOC_0001036601-mRNA-1;MSTRG.10121.1
MSTRG.10123	ACOC_0001036801	ACOC_0001036801-mRNA-1;MSTRG.10123.1
MSTRG.10124	ACOC_0001036901	ACOC_0001036901-mRNA-1;MSTRG.10124.2
MSTRG.10125	ACOC_0001037001	ACOC_0001037001-mRNA-1;MSTRG.10125.1
MSTRG.10126	ACOC_0001037101	ACOC_0001037101-mRNA-1;MSTRG.10126.2
MSTRG.10127	ACOC_0001037301	ACOC_0001037301-mRNA-1;MSTRG.10127.1
MSTRG.10129	ACOC_0001037501	ACOC_0001037501-mRNA-1;MSTRG.10129.1
MSTRG.1013	ACOC_0000108101	ACOC_0000108101-mRNA-1;MSTRG.1013.1
MSTRG.10130	ACOC_0001037601	ACOC_0001037601-mRNA-1;MSTRG.10130.1
MSTRG.10132	ACOC_0001037701	ACOC_0001037701-mRNA-1;MSTRG.10132.2
MSTRG.10133	ACOC_0001037801	ACOC_0001037801-mRNA-1;MSTRG.10133.1
MSTRG.10137	ACOC_0001037901	ACOC_0001037901-mRNA-1;MSTRG.10137.2
MSTRG.10138	ACOC_0001038001	ACOC_0001038001-mRNA-1;MSTRG.10138.1
MSTRG.10139	ACOC_0001038101	ACOC_0001038101-mRNA-1;MSTRG.10139.1
MSTRG.1014	ACOC_0000108201	ACOC_0000108201-mRNA-1;MSTRG.1014.1
MSTRG.10141	ACOC_0001038201	ACOC_0001038201-mRNA-1;MSTRG.10141.2;MSTRG.10141.3
MSTRG.10142	ACOC_0001038301	ACOC_0001038301-mRNA-1;MSTRG.10142.1;MSTRG.10142.2
MSTRG.10143	ACOC_0001038401	ACOC_0001038401-mRNA-1;MSTRG.10143.1
MSTRG.10144	ACOC_0001038501	ACOC_0001038501-mRNA-1;MSTRG.10144.1
MSTRG.10145	ACOC_0001038601	ACOC_0001038601-mRNA-1;MSTRG.10145.1
MSTRG.10146	ACOC_0001038701	ACOC_0001038701-mRNA-1;MSTRG.10146.1;MSTRG.10146.2
MSTRG.10147	ACOC_0001038801	ACOC_0001038801-mRNA-1;MSTRG.10147.1
MSTRG.10148	ACOC_0001039001	ACOC_0001039001-mRNA-1;MSTRG.10148.1
MSTRG.10149	ACOC_0001039101	ACOC_0001039101-mRNA-1;MSTRG.10149.1
MSTRG.1015	ACOC_0000108501	ACOC_0000108501-mRNA-1;MSTRG.1015.1
MSTRG.10152	ACOC_0001039301	ACOC_0001039301-mRNA-1;MSTRG.10152.1
MSTRG.10153	ACOC_0001039401	ACOC_0001039401-mRNA-1;MSTRG.10153.1
MSTRG.10154	ACOC_0001039601	ACOC_0001039601-mRNA-1;MSTRG.10154.2
MSTRG.10156	ACOC_0001039801	ACOC_0001039801-mRNA-1;MSTRG.10156.1
MSTRG.10158	ACOC_0001039901	ACOC_0001039901-mRNA-1;MSTRG.10158.2
MSTRG.10159	ACOC_0001040001	ACOC_0001040001-mRNA-1;MSTRG.10159.1
MSTRG.1016	ACOC_0000108601	ACOC_0000108601-mRNA-1;MSTRG.1016.1
MSTRG.10160	ACOC_0001040101	ACOC_0001040101-mRNA-1;MSTRG.10160.2
MSTRG.10162	ACOC_0001040201	ACOC_0001040201-mRNA-1;MSTRG.10162.1;MSTRG.10162.2;MSTRG.10162.4;MSTRG.10162.5;MSTRG.10162.6
MSTRG.10166	ACOC_0001040401	ACOC_0001040401-mRNA-1;MSTRG.10166.1;MSTRG.10166.2
MSTRG.10167	ACOC_0001040501	ACOC_0001040501-mRNA-1;MSTRG.10167.1
MSTRG.10168	ACOC_0001040601	ACOC_0001040601-mRNA-1;MSTRG.10168.2
MSTRG.10169	ACOC_0001040701	ACOC_0001040701-mRNA-1;MSTRG.10169.1
MSTRG.1017	ACOC_0000108701	ACOC_0000108701-mRNA-1;MSTRG.1017.1
MSTRG.10170	ACOC_0001040801	ACOC_0001040801-mRNA-1;MSTRG.10170.1
MSTRG.10171	ACOC_0001041001	ACOC_0001041001-mRNA-1;MSTRG.10171.1
MSTRG.10177	ACOC_0001042001	ACOC_0001042001-mRNA-1;MSTRG.10177.1
MSTRG.10178	ACOC_0001042101	ACOC_0001042101-mRNA-1;MSTRG.10178.1
MSTRG.10179	ACOC_0001042201	ACOC_0001042201-mRNA-1;MSTRG.10179.1
MSTRG.10180	ACOC_0001042301	ACOC_0001042301-mRNA-1;MSTRG.10180.1
MSTRG.10181	ACOC_0001042401	ACOC_0001042401-mRNA-1;MSTRG.10181.1
MSTRG.10183	ACOC_0001042701	ACOC_0001042701-mRNA-1;MSTRG.10183.1
MSTRG.10184	ACOC_0001042801	ACOC_0001042801-mRNA-1;MSTRG.10184.1
MSTRG.10185	ACOC_0001042901	ACOC_0001042901-mRNA-1;MSTRG.10185.1
MSTRG.10186	ACOC_0001043001	ACOC_0001043001-mRNA-1;MSTRG.10186.1
MSTRG.10189	ACOC_0001043101	ACOC_0001043101-mRNA-1;MSTRG.10189.1
MSTRG.1019	ACOC_0000108901	ACOC_0000108901-mRNA-1;MSTRG.1019.1
MSTRG.10190	ACOC_0001043201	ACOC_0001043201-mRNA-1;MSTRG.10190.2;MSTRG.10190.3
MSTRG.10191	ACOC_0001043301	ACOC_0001043301-mRNA-1;MSTRG.10191.1
MSTRG.10192	ACOC_0001043401	ACOC_0001043401-mRNA-1;MSTRG.10192.2;MSTRG.10192.3
MSTRG.10193	ACOC_0001043501	ACOC_0001043501-mRNA-1;MSTRG.10193.1;MSTRG.10193.2
MSTRG.10194	ACOC_0001043601	ACOC_0001043601-mRNA-1;MSTRG.10194.1
MSTRG.10196	ACOC_0001043801	ACOC_0001043801-mRNA-1;MSTRG.10196.1;MSTRG.10196.2
MSTRG.10199	ACOC_0001043901	ACOC_0001043901-mRNA-1;MSTRG.10199.1;MSTRG.10199.3
MSTRG.102	ACOC_0000012201	ACOC_0000012201-mRNA-1;MSTRG.102.1
MSTRG.10200	ACOC_0001044001	ACOC_0001044001-mRNA-1;MSTRG.10200.1
MSTRG.10201	ACOC_0001044101	ACOC_0001044101-mRNA-1;MSTRG.10201.1
MSTRG.10202	ACOC_0001044201	ACOC_0001044201-mRNA-1;MSTRG.10202.1
MSTRG.10203	ACOC_0001044301	ACOC_0001044301-mRNA-1;MSTRG.10203.1
MSTRG.10204	ACOC_0001044401	ACOC_0001044401-mRNA-1;MSTRG.10204.1
MSTRG.10205	ACOC_0001044501	ACOC_0001044501-mRNA-1;MSTRG.10205.1;MSTRG.10205.3
MSTRG.10207	ACOC_0001044801	ACOC_0001044801-mRNA-1;MSTRG.10207.1
MSTRG.10208	ACOC_0001044901	ACOC_0001044901-mRNA-1;MSTRG.10208.1
MSTRG.10209	ACOC_0001045001	ACOC_0001045001-mRNA-1;MSTRG.10209.1;MSTRG.10209.2
MSTRG.10210	ACOC_0001045201	ACOC_0001045201-mRNA-1;MSTRG.10210.1;MSTRG.10210.2;MSTRG.10210.3;MSTRG.10210.4;MSTRG.10210.5
MSTRG.10212	ACOC_0001045501	ACOC_0001045501-mRNA-1;MSTRG.10212.1
MSTRG.10215	ACOC_0001045601	ACOC_0001045601-mRNA-1;MSTRG.10215.1
MSTRG.10216	ACOC_0001045701	ACOC_0001045701-mRNA-1;MSTRG.10216.2
MSTRG.10217	ACOC_0001045801	ACOC_0001045801-mRNA-1;MSTRG.10217.1
MSTRG.10219	ACOC_0001046001	ACOC_0001046001-mRNA-1;MSTRG.10219.1
MSTRG.10223	ACOC_0001046301	ACOC_0001046301-mRNA-1;MSTRG.10223.1
MSTRG.10224	ACOC_0001046401	ACOC_0001046401-mRNA-1;MSTRG.10224.1;MSTRG.10224.3
MSTRG.10232	ACOC_0001047001	ACOC_0001047001-mRNA-1;MSTRG.10232.1
MSTRG.10235	ACOC_0001047301	ACOC_0001047301-mRNA-1;MSTRG.10235.1
MSTRG.10236	ACOC_0001047401	ACOC_0001047401-mRNA-1;MSTRG.10236.1;MSTRG.10236.2
MSTRG.10237	ACOC_0001047501	ACOC_0001047501-mRNA-1;MSTRG.10237.1
MSTRG.10238	ACOC_0001047601	ACOC_0001047601-mRNA-1;MSTRG.10238.1
MSTRG.10239	ACOC_0001047701	ACOC_0001047701-mRNA-1;MSTRG.10239.1;MSTRG.10239.3;MSTRG.10239.4
MSTRG.1024	ACOC_0000109301	ACOC_0000109301-mRNA-1;MSTRG.1024.2
MSTRG.10252	ACOC_0001049301	ACOC_0001049301-mRNA-1;MSTRG.10252.1
MSTRG.10253	ACOC_0001049401	ACOC_0001049401-mRNA-1;MSTRG.10253.1
MSTRG.10254	ACOC_0001049501	ACOC_0001049501-mRNA-1;MSTRG.10254.1
MSTRG.10258	ACOC_0001049601	ACOC_0001049601-mRNA-1;MSTRG.10258.2
MSTRG.10259	ACOC_0001049701	ACOC_0001049701-mRNA-1;MSTRG.10259.1
MSTRG.1026	ACOC_0000109401	ACOC_0000109401-mRNA-1;MSTRG.1026.1
MSTRG.10261	ACOC_0001050101	ACOC_0001050101-mRNA-1;MSTRG.10261.1
MSTRG.10262	ACOC_0001050201	ACOC_0001050201-mRNA-1;MSTRG.10262.1;MSTRG.10262.2
MSTRG.10265	ACOC_0001050401	ACOC_0001050401-mRNA-1;MSTRG.10265.2;MSTRG.10265.3
MSTRG.10267	ACOC_0001050501	ACOC_0001050501-mRNA-1;MSTRG.10267.1;MSTRG.10267.2
MSTRG.10269	ACOC_0001050601	ACOC_0001050601-mRNA-1;MSTRG.10269.2
MSTRG.1027	ACOC_0000109501	ACOC_0000109501-mRNA-1;MSTRG.1027.1
MSTRG.10270	ACOC_0001050701	ACOC_0001050701-mRNA-1;MSTRG.10270.1
MSTRG.10272	ACOC_0001050901	ACOC_0001050901-mRNA-1;MSTRG.10272.1
MSTRG.10273	ACOC_0001051001	ACOC_0001051001-mRNA-1;MSTRG.10273.1
MSTRG.10274	ACOC_0001051201	ACOC_0001051201-mRNA-1;MSTRG.10274.1;MSTRG.10274.2
MSTRG.10276	ACOC_0001051401	ACOC_0001051401-mRNA-1;MSTRG.10276.1
MSTRG.10278	ACOC_0001051601	ACOC_0001051601-mRNA-1;MSTRG.10278.1
MSTRG.10279	ACOC_0001051701	ACOC_0001051701-mRNA-1;MSTRG.10279.1
MSTRG.10280	ACOC_0001051801	ACOC_0001051801-mRNA-1;MSTRG.10280.1;MSTRG.10280.2
MSTRG.10281	ACOC_0001051901	ACOC_0001051901-mRNA-1;MSTRG.10281.1
MSTRG.10283	ACOC_0001052001	ACOC_0001052001-mRNA-1;MSTRG.10283.1
MSTRG.10285	ACOC_0001052101	ACOC_0001052101-mRNA-1;MSTRG.10285.1
MSTRG.10286	ACOC_0001052201	ACOC_0001052201-mRNA-1;MSTRG.10286.1
MSTRG.10287	ACOC_0001052301	ACOC_0001052301-mRNA-1;MSTRG.10287.1
MSTRG.10289	ACOC_0001052501	ACOC_0001052501-mRNA-1;MSTRG.10289.2
MSTRG.1029	ACOC_0000109801	ACOC_0000109801-mRNA-1;MSTRG.1029.1
MSTRG.10291	ACOC_0001052601	ACOC_0001052601-mRNA-1;MSTRG.10291.1
MSTRG.10292	ACOC_0001052701	ACOC_0001052701-mRNA-1;MSTRG.10292.1
MSTRG.10293	ACOC_0001052801	ACOC_0001052801-mRNA-1;MSTRG.10293.1;MSTRG.10293.3
MSTRG.10294	ACOC_0001052901	ACOC_0001052901-mRNA-1;MSTRG.10294.1
MSTRG.10295	ACOC_0001053001	ACOC_0001053001-mRNA-1;MSTRG.10295.1;MSTRG.10295.2
MSTRG.10296	ACOC_0001053101	ACOC_0001053101-mRNA-1;MSTRG.10296.1
MSTRG.10297	ACOC_0001053201	ACOC_0001053201-mRNA-1;MSTRG.10297.1
MSTRG.10299	ACOC_0001053301	ACOC_0001053301-mRNA-1;MSTRG.10299.1
MSTRG.1030	ACOC_0000109901	ACOC_0000109901-mRNA-1;MSTRG.1030.2
MSTRG.10302	ACOC_0001053601	ACOC_0001053601-mRNA-1;MSTRG.10302.1
MSTRG.10303	ACOC_0001053701	ACOC_0001053701-mRNA-1;MSTRG.10303.1
MSTRG.10304	ACOC_0001053801	ACOC_0001053801-mRNA-1;MSTRG.10304.1;MSTRG.10304.2
MSTRG.10305	ACOC_0001053901	ACOC_0001053901-mRNA-1;MSTRG.10305.1
MSTRG.10307	ACOC_0001054201	ACOC_0001054201-mRNA-1;MSTRG.10307.1
MSTRG.10308	ACOC_0001054301	ACOC_0001054301-mRNA-1;MSTRG.10308.1
MSTRG.10309	ACOC_0001054401	ACOC_0001054401-mRNA-1;MSTRG.10309.2;MSTRG.10309.3
MSTRG.10311	ACOC_0001054601	ACOC_0001054601-mRNA-1;MSTRG.10311.1
MSTRG.10312	ACOC_0001054701	ACOC_0001054701-mRNA-1;MSTRG.10312.1
MSTRG.10314	ACOC_0001054801	ACOC_0001054801-mRNA-1;MSTRG.10314.1
MSTRG.10315	ACOC_0001054901	ACOC_0001054901-mRNA-1;MSTRG.10315.1
MSTRG.10316	ACOC_0001055001	ACOC_0001055001-mRNA-1;MSTRG.10316.1
MSTRG.10320	ACOC_0001055701	ACOC_0001055701-mRNA-1;MSTRG.10320.1
MSTRG.10322	ACOC_0001055901	ACOC_0001055901-mRNA-1;MSTRG.10322.1;MSTRG.10322.2
MSTRG.10324	ACOC_0001056101	ACOC_0001056101-mRNA-1;MSTRG.10324.1
MSTRG.10325	ACOC_0001056301	ACOC_0001056301-mRNA-1;MSTRG.10325.2
MSTRG.10326	ACOC_0001056401	ACOC_0001056401-mRNA-1;MSTRG.10326.1
MSTRG.10327	ACOC_0001056501	ACOC_0001056501-mRNA-1;MSTRG.10327.2
MSTRG.10329	ACOC_0001056601	ACOC_0001056601-mRNA-1;MSTRG.10329.1
MSTRG.10330	ACOC_0001056701	ACOC_0001056701-mRNA-1;MSTRG.10330.1
MSTRG.10333	ACOC_0001057001	ACOC_0001057001-mRNA-1;MSTRG.10333.1
MSTRG.10335	ACOC_0001057501	ACOC_0001057501-mRNA-1;MSTRG.10335.1
MSTRG.10336	ACOC_0001057601	ACOC_0001057601-mRNA-1;MSTRG.10336.1
MSTRG.1034	ACOC_0000110401	ACOC_0000110401-mRNA-1;MSTRG.1034.1;MSTRG.1034.2
MSTRG.10340	ACOC_0001057801	ACOC_0001057801-mRNA-1;MSTRG.10340.1;MSTRG.10340.3;MSTRG.10340.4
MSTRG.10341	ACOC_0001057901	ACOC_0001057901-mRNA-1;MSTRG.10341.1
MSTRG.10344	ACOC_0001058101	ACOC_0001058101-mRNA-1;MSTRG.10344.1
MSTRG.10345	ACOC_0001058201	ACOC_0001058201-mRNA-1;MSTRG.10345.1
MSTRG.10346	ACOC_0001058301	ACOC_0001058301-mRNA-1;MSTRG.10346.1
MSTRG.10348	ACOC_0001058701	ACOC_0001058701-mRNA-1;MSTRG.10348.1
MSTRG.10349	ACOC_0001058801	ACOC_0001058801-mRNA-1;MSTRG.10349.1
MSTRG.10350	ACOC_0001058901	ACOC_0001058901-mRNA-1;MSTRG.10350.1
MSTRG.10351	ACOC_0001059001	ACOC_0001059001-mRNA-1;MSTRG.10351.1
MSTRG.10353	ACOC_0001060101	ACOC_0001060101-mRNA-1;MSTRG.10353.2
MSTRG.10354	ACOC_0001060201	ACOC_0001060201-mRNA-1;MSTRG.10354.1
MSTRG.10357	ACOC_0001059301	ACOC_0001059301-mRNA-1;MSTRG.10357.1;MSTRG.10357.2;MSTRG.10357.4
MSTRG.10359	ACOC_0001059501	ACOC_0001059501-mRNA-1;MSTRG.10359.1
MSTRG.1036	ACOC_0000110501	ACOC_0000110501-mRNA-1;MSTRG.1036.1
MSTRG.10360	ACOC_0001059601	ACOC_0001059601-mRNA-1;MSTRG.10360.1
MSTRG.10361	ACOC_0001059701	ACOC_0001059701-mRNA-1;MSTRG.10361.1
MSTRG.10362	ACOC_0001059801	ACOC_0001059801-mRNA-1;MSTRG.10362.1;MSTRG.10362.2
MSTRG.10363	ACOC_0001059901	ACOC_0001059901-mRNA-1;MSTRG.10363.1;MSTRG.10363.2;MSTRG.10363.3;MSTRG.10363.5
MSTRG.10364	ACOC_0001060401	ACOC_0001060401-mRNA-1;MSTRG.10364.1
MSTRG.10365	ACOC_0001060501	ACOC_0001060501-mRNA-1;MSTRG.10365.1
MSTRG.10367	ACOC_0001060901	ACOC_0001060901-mRNA-1;MSTRG.10367.1
MSTRG.10368	ACOC_0001061001	ACOC_0001061001-mRNA-1;MSTRG.10368.2;MSTRG.10368.3
MSTRG.10369	ACOC_0001061101	ACOC_0001061101-mRNA-1;MSTRG.10369.1;MSTRG.10369.2
MSTRG.1037	ACOC_0000110601	ACOC_0000110601-mRNA-1;MSTRG.1037.1
MSTRG.10370	ACOC_0001061201	ACOC_0001061201-mRNA-1;MSTRG.10370.1
MSTRG.10371	ACOC_0001061301	ACOC_0001061301-mRNA-1;MSTRG.10371.2
MSTRG.10372	ACOC_0001061401	ACOC_0001061401-mRNA-1;MSTRG.10372.1
MSTRG.10374	ACOC_0001061901	ACOC_0001061901-mRNA-1;MSTRG.10374.1
MSTRG.10375	ACOC_0001062001	ACOC_0001062001-mRNA-1;MSTRG.10375.2
MSTRG.10376	ACOC_0001062201	ACOC_0001062201-mRNA-1;MSTRG.10376.2;MSTRG.10376.3;MSTRG.10376.4;MSTRG.10376.5;MSTRG.10376.6
MSTRG.1038	ACOC_0000110701	ACOC_0000110701-mRNA-1;MSTRG.1038.1
MSTRG.10380	ACOC_0001062701	ACOC_0001062701-mRNA-1;MSTRG.10380.2
MSTRG.10381	ACOC_0001062901	ACOC_0001062901-mRNA-1;MSTRG.10381.2;MSTRG.10381.3
MSTRG.10382	ACOC_0001063001	ACOC_0001063001-mRNA-1;MSTRG.10382.1
MSTRG.10387	ACOC_0001063601	ACOC_0001063601-mRNA-1;MSTRG.10387.2
MSTRG.10388	ACOC_0001063701	ACOC_0001063701-mRNA-1;MSTRG.10388.2;MSTRG.10388.3
MSTRG.10389	ACOC_0001063801	ACOC_0001063801-mRNA-1;MSTRG.10389.1
MSTRG.10390	ACOC_0001063901	ACOC_0001063901-mRNA-1;MSTRG.10390.1;MSTRG.10390.2
MSTRG.10392	ACOC_0001064101	ACOC_0001064101-mRNA-1;MSTRG.10392.1
MSTRG.10393	ACOC_0001064201	ACOC_0001064201-mRNA-1;MSTRG.10393.1
MSTRG.10397	ACOC_0001064701	ACOC_0001064701-mRNA-1;MSTRG.10397.1
MSTRG.10398	ACOC_0001064801	ACOC_0001064801-mRNA-1;MSTRG.10398.1;MSTRG.10398.2;MSTRG.10398.3;MSTRG.10398.4
MSTRG.104	ACOC_0000012401	ACOC_0000012401-mRNA-1;MSTRG.104.1
MSTRG.10400	ACOC_0001065101	ACOC_0001065101-mRNA-1;MSTRG.10400.1
MSTRG.10402	ACOC_0001065801	ACOC_0001065801-mRNA-1;MSTRG.10402.1
MSTRG.10403	ACOC_0001065901	ACOC_0001065901-mRNA-1;MSTRG.10403.1
MSTRG.10404	ACOC_0001066001	ACOC_0001066001-mRNA-1;MSTRG.10404.1;MSTRG.10404.2
MSTRG.10406	ACOC_0001066201	ACOC_0001066201-mRNA-1;MSTRG.10406.2
MSTRG.10407	ACOC_0001066301	ACOC_0001066301-mRNA-1;MSTRG.10407.1
MSTRG.10409	ACOC_0001066401	ACOC_0001066401-mRNA-1;MSTRG.10409.1
MSTRG.1041	ACOC_0000111101	ACOC_0000111101-mRNA-1;MSTRG.1041.1
MSTRG.10410	ACOC_0001066501	ACOC_0001066501-mRNA-1;MSTRG.10410.2
MSTRG.10411	ACOC_0001066601	ACOC_0001066601-mRNA-1;MSTRG.10411.2
MSTRG.10412	ACOC_0001066701	ACOC_0001066701-mRNA-1;MSTRG.10412.1
MSTRG.10414	ACOC_0001066801	ACOC_0001066801-mRNA-1;MSTRG.10414.2;MSTRG.10414.3
MSTRG.10415	ACOC_0001066901	ACOC_0001066901-mRNA-1;MSTRG.10415.1
MSTRG.10416	ACOC_0001067001	ACOC_0001067001-mRNA-1;MSTRG.10416.1
MSTRG.10417	ACOC_0001067101	ACOC_0001067101-mRNA-1;MSTRG.10417.1
MSTRG.10418	ACOC_0001067201	ACOC_0001067201-mRNA-1;MSTRG.10418.1
MSTRG.1042	ACOC_0000111201	ACOC_0000111201-mRNA-1;MSTRG.1042.1
MSTRG.10422	ACOC_0001067401	ACOC_0001067401-mRNA-1;MSTRG.10422.1
MSTRG.10423	ACOC_0001067501	ACOC_0001067501-mRNA-1;MSTRG.10423.1;MSTRG.10423.2;MSTRG.10423.4
MSTRG.10424	ACOC_0001067601	ACOC_0001067601-mRNA-1;MSTRG.10424.1
MSTRG.10427	ACOC_0001068001	ACOC_0001068001-mRNA-1;MSTRG.10427.1
MSTRG.10428	ACOC_0001068101	ACOC_0001068101-mRNA-1;MSTRG.10428.1;MSTRG.10428.2
MSTRG.1043	ACOC_0000111301	ACOC_0000111301-mRNA-1;MSTRG.1043.2
MSTRG.10433	ACOC_0001068301	ACOC_0001068301-mRNA-1;MSTRG.10433.2
MSTRG.10434	ACOC_0001068401	ACOC_0001068401-mRNA-1;MSTRG.10434.1
MSTRG.10435	ACOC_0001068501	ACOC_0001068501-mRNA-1;MSTRG.10435.1
MSTRG.10437	ACOC_0001068601	ACOC_0001068601-mRNA-1;MSTRG.10437.1
MSTRG.10438	ACOC_0001068701	ACOC_0001068701-mRNA-1;MSTRG.10438.1
MSTRG.10439	ACOC_0001068801	ACOC_0001068801-mRNA-1;MSTRG.10439.2
MSTRG.10440	ACOC_0001068901	ACOC_0001068901-mRNA-1;MSTRG.10440.1;MSTRG.10440.3
MSTRG.10441	ACOC_0001069001	ACOC_0001069001-mRNA-1;MSTRG.10441.2
MSTRG.10442	ACOC_0001069101	ACOC_0001069101-mRNA-1;MSTRG.10442.2
MSTRG.10446	ACOC_0001069401	ACOC_0001069401-mRNA-1;MSTRG.10446.1;MSTRG.10446.2
MSTRG.10448	ACOC_0001069901	ACOC_0001069901-mRNA-1;MSTRG.10448.1
MSTRG.10451	ACOC_0001070201	ACOC_0001070201-mRNA-1;MSTRG.10451.1
MSTRG.10452	ACOC_0001070301	ACOC_0001070301-mRNA-1;MSTRG.10452.1;MSTRG.10452.3
MSTRG.10453	ACOC_0001070401	ACOC_0001070401-mRNA-1;MSTRG.10453.1
MSTRG.10454	ACOC_0001070501	ACOC_0001070501-mRNA-1;MSTRG.10454.1
MSTRG.10457	ACOC_0001071001	ACOC_0001071001-mRNA-1;MSTRG.10457.1;MSTRG.10457.2;MSTRG.10457.3
MSTRG.10458	ACOC_0001071101	ACOC_0001071101-mRNA-1;MSTRG.10458.1
MSTRG.10463	ACOC_0001071401	ACOC_0001071401-mRNA-1;MSTRG.10463.1
MSTRG.10464	ACOC_0001071501	ACOC_0001071501-mRNA-1;MSTRG.10464.2;MSTRG.10464.3
MSTRG.10465	ACOC_0001071601	ACOC_0001071601-mRNA-1;MSTRG.10465.1
MSTRG.10468	ACOC_0001071901	ACOC_0001071901-mRNA-1;MSTRG.10468.1
MSTRG.10469	ACOC_0001072001	ACOC_0001072001-mRNA-1;MSTRG.10469.1
MSTRG.1047	ACOC_0000111501	ACOC_0000111501-mRNA-1;MSTRG.1047.1
MSTRG.10470	ACOC_0001072101	ACOC_0001072101-mRNA-1;MSTRG.10470.2
MSTRG.10471	ACOC_0001072201	ACOC_0001072201-mRNA-1;MSTRG.10471.1
MSTRG.10474	ACOC_0001072301	ACOC_0001072301-mRNA-1;MSTRG.10474.1
MSTRG.10475	ACOC_0001072401	ACOC_0001072401-mRNA-1;MSTRG.10475.1
MSTRG.10476	ACOC_0001072501	ACOC_0001072501-mRNA-1;MSTRG.10476.2
MSTRG.10478	ACOC_0001072801	ACOC_0001072801-mRNA-1;MSTRG.10478.1
MSTRG.10479	ACOC_0001072901	ACOC_0001072901-mRNA-1;MSTRG.10479.1
MSTRG.10480	ACOC_0001073001	ACOC_0001073001-mRNA-1;MSTRG.10480.1
MSTRG.10481	ACOC_0001073101	ACOC_0001073101-mRNA-1;MSTRG.10481.1
MSTRG.10483	ACOC_0001073201	ACOC_0001073201-mRNA-1;MSTRG.10483.1
MSTRG.10484	ACOC_0001073301	ACOC_0001073301-mRNA-1;MSTRG.10484.1
MSTRG.10485	ACOC_0001073401	ACOC_0001073401-mRNA-1;MSTRG.10485.1
MSTRG.10486	ACOC_0001073601	ACOC_0001073601-mRNA-1;MSTRG.10486.1
MSTRG.10488	ACOC_0001073701	ACOC_0001073701-mRNA-1;MSTRG.10488.1
MSTRG.10494	ACOC_0001074401	ACOC_0001074401-mRNA-1;MSTRG.10494.1
MSTRG.10495	ACOC_0001074501	ACOC_0001074501-mRNA-1;MSTRG.10495.1;MSTRG.10495.2
MSTRG.10497	ACOC_0001074701	ACOC_0001074701-mRNA-1;MSTRG.10497.1
MSTRG.1050	ACOC_0000111801	ACOC_0000111801-mRNA-1;MSTRG.1050.1
MSTRG.10501	ACOC_0001075301	ACOC_0001075301-mRNA-1;MSTRG.10501.1
MSTRG.10502	ACOC_0001075401	ACOC_0001075401-mRNA-1;MSTRG.10502.1
MSTRG.10503	ACOC_0001075501	ACOC_0001075501-mRNA-1;MSTRG.10503.1;MSTRG.10503.2
MSTRG.10504	ACOC_0001075601	ACOC_0001075601-mRNA-1;MSTRG.10504.1
MSTRG.10506	ACOC_0001075901	ACOC_0001075901-mRNA-1;MSTRG.10506.2
MSTRG.10507	ACOC_0001076001	ACOC_0001076001-mRNA-1;MSTRG.10507.1
MSTRG.10508	ACOC_0001076101	ACOC_0001076101-mRNA-1;MSTRG.10508.1
MSTRG.10509	ACOC_0001076201	ACOC_0001076201-mRNA-1;MSTRG.10509.1
MSTRG.1051	ACOC_0000111901	ACOC_0000111901-mRNA-1;MSTRG.1051.1
MSTRG.10510	ACOC_0001076301	ACOC_0001076301-mRNA-1;MSTRG.10510.1
MSTRG.10511	ACOC_0001076401	ACOC_0001076401-mRNA-1;MSTRG.10511.1
MSTRG.10513	ACOC_0001076701	ACOC_0001076701-mRNA-1;MSTRG.10513.2;MSTRG.10513.3;MSTRG.10513.4
MSTRG.10514	ACOC_0001076801	ACOC_0001076801-mRNA-1;MSTRG.10514.1
MSTRG.10515	ACOC_0001076901	ACOC_0001076901-mRNA-1;MSTRG.10515.1
MSTRG.10517	ACOC_0001077301	ACOC_0001077301-mRNA-1;MSTRG.10517.1
MSTRG.10518	ACOC_0001077401	ACOC_0001077401-mRNA-1;MSTRG.10518.1;MSTRG.10518.2
MSTRG.1052	ACOC_0000112001	ACOC_0000112001-mRNA-1;MSTRG.1052.2
MSTRG.10521	ACOC_0001077601	ACOC_0001077601-mRNA-1;MSTRG.10521.1
MSTRG.10522	ACOC_0001077701	ACOC_0001077701-mRNA-1;MSTRG.10522.1
MSTRG.10524	ACOC_0001077901	ACOC_0001077901-mRNA-1;MSTRG.10524.1
MSTRG.10525	ACOC_0001078001	ACOC_0001078001-mRNA-1;MSTRG.10525.1
MSTRG.10526	ACOC_0001078101	ACOC_0001078101-mRNA-1;MSTRG.10526.1
MSTRG.10527	ACOC_0001078201	ACOC_0001078201-mRNA-1;MSTRG.10527.1
MSTRG.10528	ACOC_0001078301	ACOC_0001078301-mRNA-1;MSTRG.10528.1;MSTRG.10528.2
MSTRG.10529	ACOC_0001078401	ACOC_0001078401-mRNA-1;MSTRG.10529.1
MSTRG.10530	ACOC_0001078501	ACOC_0001078501-mRNA-1;MSTRG.10530.1
MSTRG.10531	ACOC_0001078601	ACOC_0001078601-mRNA-1;MSTRG.10531.2
MSTRG.10533	ACOC_0001079101	ACOC_0001079101-mRNA-1;MSTRG.10533.2
MSTRG.10536	ACOC_0001079201	ACOC_0001079201-mRNA-1;MSTRG.10536.1;MSTRG.10536.2
MSTRG.10538	ACOC_0001079501	ACOC_0001079501-mRNA-1;MSTRG.10538.1
MSTRG.1054	ACOC_0000112301	ACOC_0000112301-mRNA-1;MSTRG.1054.1
MSTRG.10542	ACOC_0001079801	ACOC_0001079801-mRNA-1;MSTRG.10542.1
MSTRG.10543	ACOC_0001080001	ACOC_0001080001-mRNA-1;MSTRG.10543.2;MSTRG.10543.3
MSTRG.10549	ACOC_0001080801	ACOC_0001080801-mRNA-1;MSTRG.10549.2
MSTRG.10550	ACOC_0001080901	ACOC_0001080901-mRNA-1;MSTRG.10550.1
MSTRG.10553	ACOC_0001081401	ACOC_0001081401-mRNA-1;MSTRG.10553.1;MSTRG.10553.2
MSTRG.10555	ACOC_0001081701	ACOC_0001081701-mRNA-1;MSTRG.10555.2
MSTRG.10556	ACOC_0001081801	ACOC_0001081801-mRNA-1;MSTRG.10556.1
MSTRG.10557	ACOC_0001081901	ACOC_0001081901-mRNA-1;MSTRG.10557.1
MSTRG.10558	ACOC_0001082001	ACOC_0001082001-mRNA-1;MSTRG.10558.1
MSTRG.10559	ACOC_0001082101	ACOC_0001082101-mRNA-1;MSTRG.10559.1
MSTRG.10560	ACOC_0001082201	ACOC_0001082201-mRNA-1;MSTRG.10560.1;MSTRG.10560.3
MSTRG.10561	ACOC_0001082301	ACOC_0001082301-mRNA-1;MSTRG.10561.1
MSTRG.10562	ACOC_0001082401	ACOC_0001082401-mRNA-1;MSTRG.10562.1;MSTRG.10562.3;MSTRG.10562.4
MSTRG.10563	ACOC_0001082501	ACOC_0001082501-mRNA-1;MSTRG.10563.1
MSTRG.10564	ACOC_0001082601	ACOC_0001082601-mRNA-1;MSTRG.10564.1
MSTRG.10566	ACOC_0001082701	ACOC_0001082701-mRNA-1;MSTRG.10566.1;MSTRG.10566.3
MSTRG.10567	ACOC_0001082801	ACOC_0001082801-mRNA-1;MSTRG.10567.1;MSTRG.10567.2
MSTRG.1057	ACOC_0000112501	ACOC_0000112501-mRNA-1;MSTRG.1057.2
MSTRG.10570	ACOC_0001083301	ACOC_0001083301-mRNA-1;MSTRG.10570.1
MSTRG.10573	ACOC_0001083601	ACOC_0001083601-mRNA-1;MSTRG.10573.2
MSTRG.10575	ACOC_0001083701	ACOC_0001083701-mRNA-1;MSTRG.10575.1;MSTRG.10575.2
MSTRG.10577	ACOC_0001083801	ACOC_0001083801-mRNA-1;MSTRG.10577.1;MSTRG.10577.2
MSTRG.10578	ACOC_0001083901	ACOC_0001083901-mRNA-1;MSTRG.10578.1;MSTRG.10578.3
MSTRG.10581	ACOC_0001084301	ACOC_0001084301-mRNA-1;MSTRG.10581.1
MSTRG.10582	ACOC_0001084401	ACOC_0001084401-mRNA-1;MSTRG.10582.1;MSTRG.10582.2
MSTRG.10583	ACOC_0001084501	ACOC_0001084501-mRNA-1;MSTRG.10583.1
MSTRG.10584	ACOC_0001084601	ACOC_0001084601-mRNA-1;MSTRG.10584.1
MSTRG.10586	ACOC_0001084701	ACOC_0001084701-mRNA-1;MSTRG.10586.1;MSTRG.10586.2
MSTRG.10588	ACOC_0001084801	ACOC_0001084801-mRNA-1;MSTRG.10588.1
MSTRG.1059	ACOC_0000112701	ACOC_0000112701-mRNA-1;MSTRG.1059.1
MSTRG.10590	ACOC_0001084901	ACOC_0001084901-mRNA-1;MSTRG.10590.2
MSTRG.10593	ACOC_0001085301	ACOC_0001085301-mRNA-1;MSTRG.10593.1
MSTRG.10594	ACOC_0001085601	ACOC_0001085601-mRNA-1;MSTRG.10594.1
MSTRG.10596	ACOC_0001085701	ACOC_0001085701-mRNA-1;MSTRG.10596.1
MSTRG.10599	ACOC_0001086101	ACOC_0001086101-mRNA-1;MSTRG.10599.1
MSTRG.1060	ACOC_0000112801	ACOC_0000112801-mRNA-1;MSTRG.1060.1;MSTRG.1060.2
MSTRG.10600	ACOC_0001086201	ACOC_0001086201-mRNA-1;MSTRG.10600.1
MSTRG.10601	ACOC_0001086301	ACOC_0001086301-mRNA-1;MSTRG.10601.1;MSTRG.10601.3
MSTRG.10602	ACOC_0001086501	ACOC_0001086501-mRNA-1;MSTRG.10602.1
MSTRG.10604	ACOC_0001086901	ACOC_0001086901-mRNA-1;MSTRG.10604.2
MSTRG.10607	ACOC_0001087201	ACOC_0001087201-mRNA-1;MSTRG.10607.1;MSTRG.10607.2
MSTRG.10608	ACOC_0001087301	ACOC_0001087301-mRNA-1;MSTRG.10608.1
MSTRG.1061	ACOC_0000112901	ACOC_0000112901-mRNA-1;MSTRG.1061.1
MSTRG.10610	ACOC_0001087501	ACOC_0001087501-mRNA-1;MSTRG.10610.1
MSTRG.10611	ACOC_0001087601	ACOC_0001087601-mRNA-1;MSTRG.10611.1;MSTRG.10611.2
MSTRG.10612	ACOC_0001087701	ACOC_0001087701-mRNA-1;MSTRG.10612.1
MSTRG.10614	ACOC_0001087901	ACOC_0001087901-mRNA-1;MSTRG.10614.2;MSTRG.10614.3
MSTRG.10616	ACOC_0001088201	ACOC_0001088201-mRNA-1;MSTRG.10616.2
MSTRG.10617	ACOC_0001088301	ACOC_0001088301-mRNA-1;MSTRG.10617.1
MSTRG.10620	ACOC_0001088501	ACOC_0001088501-mRNA-1;MSTRG.10620.1
MSTRG.10625	ACOC_0001088901	ACOC_0001088901-mRNA-1;MSTRG.10625.1
MSTRG.10628	ACOC_0001089201	ACOC_0001089201-mRNA-1;MSTRG.10628.1
MSTRG.10629	ACOC_0001089301	ACOC_0001089301-mRNA-1;MSTRG.10629.1
MSTRG.10630	ACOC_0001089401	ACOC_0001089401-mRNA-1;MSTRG.10630.2;MSTRG.10630.3
MSTRG.10631	ACOC_0001089601	ACOC_0001089601-mRNA-1;MSTRG.10631.2
MSTRG.10633	ACOC_0001089801	ACOC_0001089801-mRNA-1;MSTRG.10633.1;MSTRG.10633.3
MSTRG.10634	ACOC_0001089901	ACOC_0001089901-mRNA-1;MSTRG.10634.1
MSTRG.10635	ACOC_0001090001	ACOC_0001090001-mRNA-1;MSTRG.10635.1
MSTRG.10636	ACOC_0001090101	ACOC_0001090101-mRNA-1;MSTRG.10636.1
MSTRG.10638	ACOC_0001090201	ACOC_0001090201-mRNA-1;MSTRG.10638.1;MSTRG.10638.2
MSTRG.10639	ACOC_0001090301	ACOC_0001090301-mRNA-1;MSTRG.10639.1
MSTRG.1064	ACOC_0000113201	ACOC_0000113201-mRNA-1;MSTRG.1064.1
MSTRG.10640	ACOC_0001090401	ACOC_0001090401-mRNA-1;MSTRG.10640.1
MSTRG.10643	ACOC_0001090701	ACOC_0001090701-mRNA-1;MSTRG.10643.1
MSTRG.10644	ACOC_0001090801	ACOC_0001090801-mRNA-1;MSTRG.10644.1
MSTRG.10647	ACOC_0001090901	ACOC_0001090901-mRNA-1;MSTRG.10647.1
MSTRG.10648	ACOC_0001091001	ACOC_0001091001-mRNA-1;MSTRG.10648.1
MSTRG.1065	ACOC_0000113301	ACOC_0000113301-mRNA-1;MSTRG.1065.1
MSTRG.10650	ACOC_0001091301	ACOC_0001091301-mRNA-1;MSTRG.10650.1
MSTRG.10653	ACOC_0001091501	ACOC_0001091501-mRNA-1;MSTRG.10653.1
MSTRG.10654	ACOC_0001091601	ACOC_0001091601-mRNA-1;MSTRG.10654.1;MSTRG.10654.2
MSTRG.10655	ACOC_0001091701	ACOC_0001091701-mRNA-1;MSTRG.10655.2;MSTRG.10655.3
MSTRG.10656	ACOC_0001091801	ACOC_0001091801-mRNA-1;MSTRG.10656.1
MSTRG.1066	ACOC_0000113401	ACOC_0000113401-mRNA-1;MSTRG.1066.1
MSTRG.10660	ACOC_0001091901	ACOC_0001091901-mRNA-1;MSTRG.10660.1
MSTRG.10661	ACOC_0001092001	ACOC_0001092001-mRNA-1;MSTRG.10661.2
MSTRG.10665	ACOC_0001092701	ACOC_0001092701-mRNA-1;MSTRG.10665.1
MSTRG.10666	ACOC_0001092901	ACOC_0001092901-mRNA-1;MSTRG.10666.1
MSTRG.10667	ACOC_0001093101	ACOC_0001093101-mRNA-1;MSTRG.10667.1;MSTRG.10667.2
MSTRG.10668	ACOC_0001093201	ACOC_0001093201-mRNA-1;MSTRG.10668.1
MSTRG.10669	ACOC_0001093301	ACOC_0001093301-mRNA-1;MSTRG.10669.2
MSTRG.10671	ACOC_0001093501	ACOC_0001093501-mRNA-1;MSTRG.10671.1;MSTRG.10671.2;MSTRG.10671.3;MSTRG.10671.5
MSTRG.10675	ACOC_0001093901	ACOC_0001093901-mRNA-1;MSTRG.10675.1
MSTRG.10676	ACOC_0001094001	ACOC_0001094001-mRNA-1;MSTRG.10676.1;MSTRG.10676.2
MSTRG.10678	ACOC_0001094101	ACOC_0001094101-mRNA-1;MSTRG.10678.1
MSTRG.10679	ACOC_0001094401	ACOC_0001094401-mRNA-1;MSTRG.10679.1;MSTRG.10679.2
MSTRG.1068	ACOC_0000113501	ACOC_0000113501-mRNA-1;MSTRG.1068.1
MSTRG.10680	ACOC_0001094501	ACOC_0001094501-mRNA-1;MSTRG.10680.1;MSTRG.10680.3
MSTRG.10681	ACOC_0001094601	ACOC_0001094601-mRNA-1;MSTRG.10681.1
MSTRG.10682	ACOC_0001094701	ACOC_0001094701-mRNA-1;MSTRG.10682.1
MSTRG.10684	ACOC_0001094801	ACOC_0001094801-mRNA-1;MSTRG.10684.1
MSTRG.10685	ACOC_0001094901	ACOC_0001094901-mRNA-1;MSTRG.10685.1
MSTRG.10689	ACOC_0001095301	ACOC_0001095301-mRNA-1;MSTRG.10689.1
MSTRG.1069	ACOC_0000113601	ACOC_0000113601-mRNA-1;MSTRG.1069.1
MSTRG.10690	ACOC_0001095401	ACOC_0001095401-mRNA-1;MSTRG.10690.1
MSTRG.10692	ACOC_0001095701	ACOC_0001095701-mRNA-1;MSTRG.10692.1;MSTRG.10692.2
MSTRG.10693	ACOC_0001095801	ACOC_0001095801-mRNA-1;MSTRG.10693.1;MSTRG.10693.2
MSTRG.10694	ACOC_0001095901	ACOC_0001095901-mRNA-1;MSTRG.10694.1
MSTRG.10699	ACOC_0001096301	ACOC_0001096301-mRNA-1;MSTRG.10699.1
MSTRG.1070	ACOC_0000113701	ACOC_0000113701-mRNA-1;MSTRG.1070.1;MSTRG.1070.2;MSTRG.1070.3
MSTRG.10701	ACOC_0001096501	ACOC_0001096501-mRNA-1;MSTRG.10701.1
MSTRG.10702	ACOC_0001096601	ACOC_0001096601-mRNA-1;MSTRG.10702.1
MSTRG.10704	ACOC_0001096701	ACOC_0001096701-mRNA-1;MSTRG.10704.1
MSTRG.10706	ACOC_0001097001	ACOC_0001097001-mRNA-1;MSTRG.10706.1
MSTRG.1071	ACOC_0000113801	ACOC_0000113801-mRNA-1;MSTRG.1071.1
MSTRG.10710	ACOC_0001097601	ACOC_0001097601-mRNA-1;MSTRG.10710.1
MSTRG.10712	ACOC_0001097701	ACOC_0001097701-mRNA-1;MSTRG.10712.2
MSTRG.10713	ACOC_0001097801	ACOC_0001097801-mRNA-1;MSTRG.10713.1
MSTRG.10714	ACOC_0001097901	ACOC_0001097901-mRNA-1;MSTRG.10714.1
MSTRG.10716	ACOC_0001098001	ACOC_0001098001-mRNA-1;MSTRG.10716.1
MSTRG.10717	ACOC_0001098101	ACOC_0001098101-mRNA-1;MSTRG.10717.2
MSTRG.10718	ACOC_0001098201	ACOC_0001098201-mRNA-1;MSTRG.10718.1
MSTRG.10719	ACOC_0001098301	ACOC_0001098301-mRNA-1;MSTRG.10719.1
MSTRG.1072	ACOC_0000113901	ACOC_0000113901-mRNA-1;MSTRG.1072.2
MSTRG.10720	ACOC_0001098401	ACOC_0001098401-mRNA-1;MSTRG.10720.1
MSTRG.10721	ACOC_0001098501	ACOC_0001098501-mRNA-1;MSTRG.10721.1
MSTRG.10722	ACOC_0001098601	ACOC_0001098601-mRNA-1;MSTRG.10722.1
MSTRG.10723	ACOC_0001098701	ACOC_0001098701-mRNA-1;MSTRG.10723.2
MSTRG.10724	ACOC_0001098801	ACOC_0001098801-mRNA-1;MSTRG.10724.1
MSTRG.10725	ACOC_0001098901	ACOC_0001098901-mRNA-1;MSTRG.10725.1;MSTRG.10725.2
MSTRG.10727	ACOC_0001099201	ACOC_0001099201-mRNA-1;MSTRG.10727.1;MSTRG.10727.3;MSTRG.10727.4
MSTRG.10729	ACOC_0001099501	ACOC_0001099501-mRNA-1;MSTRG.10729.1;MSTRG.10729.2;MSTRG.10729.3
MSTRG.1073	ACOC_0000114001	ACOC_0000114001-mRNA-1;MSTRG.1073.1
MSTRG.10732	ACOC_0001099701	ACOC_0001099701-mRNA-1;MSTRG.10732.1
MSTRG.10733	ACOC_0001099801	ACOC_0001099801-mRNA-1;MSTRG.10733.2;MSTRG.10733.3;MSTRG.10733.4
MSTRG.10736	ACOC_0001100301	ACOC_0001100301-mRNA-1;MSTRG.10736.1
MSTRG.10739	ACOC_0001100601	ACOC_0001100601-mRNA-1;MSTRG.10739.2
MSTRG.1074	ACOC_0000114101	ACOC_0000114101-mRNA-1;MSTRG.1074.1;MSTRG.1074.2
MSTRG.10740	ACOC_0001100701	ACOC_0001100701-mRNA-1;MSTRG.10740.1
MSTRG.10741	ACOC_0001100801	ACOC_0001100801-mRNA-1;MSTRG.10741.1
MSTRG.10744	ACOC_0001101201	ACOC_0001101201-mRNA-1;MSTRG.10744.1
MSTRG.10745	ACOC_0001101301	ACOC_0001101301-mRNA-1;MSTRG.10745.1
MSTRG.10746	ACOC_0001101401	ACOC_0001101401-mRNA-1;MSTRG.10746.1
MSTRG.10747	ACOC_0001101501	ACOC_0001101501-mRNA-1;MSTRG.10747.2
MSTRG.10748	ACOC_0001101601	ACOC_0001101601-mRNA-1;MSTRG.10748.2
MSTRG.1075	ACOC_0000114201	ACOC_0000114201-mRNA-1;MSTRG.1075.1;MSTRG.1075.2
MSTRG.10750	ACOC_0001101901	ACOC_0001101901-mRNA-1;MSTRG.10750.2
MSTRG.10753	ACOC_0001102301	ACOC_0001102301-mRNA-1;MSTRG.10753.1
MSTRG.10755	ACOC_0001102701	ACOC_0001102701-mRNA-1;MSTRG.10755.1
MSTRG.10757	ACOC_0001103001	ACOC_0001103001-mRNA-1;MSTRG.10757.1
MSTRG.10758	ACOC_0001103101	ACOC_0001103101-mRNA-1;MSTRG.10758.1
MSTRG.10760	ACOC_0001103201	ACOC_0001103201-mRNA-1;MSTRG.10760.1
MSTRG.10761	ACOC_0001103301	ACOC_0001103301-mRNA-1;MSTRG.10761.1;MSTRG.10761.3
MSTRG.10766	ACOC_0001103801	ACOC_0001103801-mRNA-1;MSTRG.10766.1
MSTRG.10767	ACOC_0001103901	ACOC_0001103901-mRNA-1;MSTRG.10767.1
MSTRG.10768	ACOC_0001104001	ACOC_0001104001-mRNA-1;MSTRG.10768.1
MSTRG.10769	ACOC_0001104101	ACOC_0001104101-mRNA-1;MSTRG.10769.1
MSTRG.1077	ACOC_0000114601	ACOC_0000114601-mRNA-1;MSTRG.1077.1
MSTRG.10770	ACOC_0001104201	ACOC_0001104201-mRNA-1;MSTRG.10770.1
MSTRG.10772	ACOC_0001104401	ACOC_0001104401-mRNA-1;MSTRG.10772.2
MSTRG.10773	ACOC_0001104501	ACOC_0001104501-mRNA-1;MSTRG.10773.1
MSTRG.10775	ACOC_0001104801	ACOC_0001104801-mRNA-1;MSTRG.10775.1
MSTRG.10776	ACOC_0001104901	ACOC_0001104901-mRNA-1;MSTRG.10776.1;MSTRG.10776.2
MSTRG.10777	ACOC_0001105101	ACOC_0001105101-mRNA-1;MSTRG.10777.1
MSTRG.10778	ACOC_0001105301	ACOC_0001105301-mRNA-1;MSTRG.10778.1
MSTRG.10780	ACOC_0001105601	ACOC_0001105601-mRNA-1;MSTRG.10780.1
MSTRG.10782	ACOC_0001105901	ACOC_0001105901-mRNA-1;MSTRG.10782.1
MSTRG.10783	ACOC_0001106001	ACOC_0001106001-mRNA-1;MSTRG.10783.1
MSTRG.10784	ACOC_0001106201	ACOC_0001106201-mRNA-1;MSTRG.10784.1
MSTRG.10786	ACOC_0001106301	ACOC_0001106301-mRNA-1;MSTRG.10786.1
MSTRG.10787	ACOC_0001106401	ACOC_0001106401-mRNA-1;MSTRG.10787.1
MSTRG.10788	ACOC_0001106501	ACOC_0001106501-mRNA-1;MSTRG.10788.1;MSTRG.10788.2
MSTRG.10789	ACOC_0001106601	ACOC_0001106601-mRNA-1;MSTRG.10789.1
MSTRG.1079	ACOC_0000114901	ACOC_0000114901-mRNA-1;MSTRG.1079.1;MSTRG.1079.2
MSTRG.10790	ACOC_0001106701	ACOC_0001106701-mRNA-1;MSTRG.10790.1
MSTRG.10791	ACOC_0001106901	ACOC_0001106901-mRNA-1;MSTRG.10791.1
MSTRG.10792	ACOC_0001107001	ACOC_0001107001-mRNA-1;MSTRG.10792.1
MSTRG.10794	ACOC_0001107201	ACOC_0001107201-mRNA-1;MSTRG.10794.1
MSTRG.10795	ACOC_0001107301	ACOC_0001107301-mRNA-1;MSTRG.10795.1
MSTRG.10796	ACOC_0001107401	ACOC_0001107401-mRNA-1;MSTRG.10796.1
MSTRG.10797	ACOC_0001107501	ACOC_0001107501-mRNA-1;MSTRG.10797.1
MSTRG.10798	ACOC_0001107701	ACOC_0001107701-mRNA-1;MSTRG.10798.2
MSTRG.10799	ACOC_0001107801	ACOC_0001107801-mRNA-1;MSTRG.10799.1
MSTRG.1080	ACOC_0000115001	ACOC_0000115001-mRNA-1;MSTRG.1080.1
MSTRG.10801	ACOC_0001108001	ACOC_0001108001-mRNA-1;MSTRG.10801.1
MSTRG.10804	ACOC_0001108101	ACOC_0001108101-mRNA-1;MSTRG.10804.1
MSTRG.10807	ACOC_0001108401	ACOC_0001108401-mRNA-1;MSTRG.10807.1;MSTRG.10807.3
MSTRG.10808	ACOC_0001108601	ACOC_0001108601-mRNA-1;MSTRG.10808.1;MSTRG.10808.2
MSTRG.1081	ACOC_0000115101	ACOC_0000115101-mRNA-1;MSTRG.1081.1
MSTRG.10810	ACOC_0001108701	ACOC_0001108701-mRNA-1;MSTRG.10810.1
MSTRG.10811	ACOC_0001108801	ACOC_0001108801-mRNA-1;MSTRG.10811.1
MSTRG.10813	ACOC_0001109101	ACOC_0001109101-mRNA-1;MSTRG.10813.2
MSTRG.10816	ACOC_0001109401	ACOC_0001109401-mRNA-1;MSTRG.10816.1
MSTRG.1082	ACOC_0000115301	ACOC_0000115301-mRNA-1;MSTRG.1082.1;MSTRG.1082.2
MSTRG.10820	ACOC_0001109501	ACOC_0001109501-mRNA-1;MSTRG.10820.2
MSTRG.10823	ACOC_0001109601	ACOC_0001109601-mRNA-1;MSTRG.10823.1
MSTRG.10824	ACOC_0001109801	ACOC_0001109801-mRNA-1;MSTRG.10824.1
MSTRG.10826	ACOC_0001110001	ACOC_0001110001-mRNA-1;MSTRG.10826.1;MSTRG.10826.2
MSTRG.10827	ACOC_0001110101	ACOC_0001110101-mRNA-1;MSTRG.10827.1
MSTRG.10833	ACOC_0001110401	ACOC_0001110401-mRNA-1;MSTRG.10833.1
MSTRG.10834	ACOC_0001110501	ACOC_0001110501-mRNA-1;MSTRG.10834.1
MSTRG.10836	ACOC_0001110601	ACOC_0001110601-mRNA-1;MSTRG.10836.1;MSTRG.10836.2
MSTRG.10837	ACOC_0001110701	ACOC_0001110701-mRNA-1;MSTRG.10837.1;MSTRG.10837.3
MSTRG.10838	ACOC_0001110801	ACOC_0001110801-mRNA-1;MSTRG.10838.1;MSTRG.10838.3
MSTRG.1084	ACOC_0000115501	ACOC_0000115501-mRNA-1;MSTRG.1084.1
MSTRG.10840	ACOC_0001111201	ACOC_0001111201-mRNA-1;MSTRG.10840.1
MSTRG.10841	ACOC_0001111301	ACOC_0001111301-mRNA-1;MSTRG.10841.1
MSTRG.10842	ACOC_0001111401	ACOC_0001111401-mRNA-1;MSTRG.10842.1
MSTRG.10843	ACOC_0001111501	ACOC_0001111501-mRNA-1;MSTRG.10843.1;MSTRG.10843.3
MSTRG.10844	ACOC_0001111701	ACOC_0001111701-mRNA-1;MSTRG.10844.2
MSTRG.10850	ACOC_0001112201	ACOC_0001112201-mRNA-1;MSTRG.10850.1
MSTRG.10851	ACOC_0001112401	ACOC_0001112401-mRNA-1;MSTRG.10851.1
MSTRG.10852	ACOC_0001112501	ACOC_0001112501-mRNA-1;MSTRG.10852.2
MSTRG.10853	ACOC_0001112601	ACOC_0001112601-mRNA-1;MSTRG.10853.1
MSTRG.10854	ACOC_0001112701	ACOC_0001112701-mRNA-1;MSTRG.10854.1
MSTRG.10855	ACOC_0001112801	ACOC_0001112801-mRNA-1;MSTRG.10855.1
MSTRG.10856	ACOC_0001113101	ACOC_0001113101-mRNA-1;MSTRG.10856.1
MSTRG.10858	ACOC_0001113401	ACOC_0001113401-mRNA-1;MSTRG.10858.2
MSTRG.10859	ACOC_0001113501	ACOC_0001113501-mRNA-1;MSTRG.10859.2
MSTRG.10860	ACOC_0001113601	ACOC_0001113601-mRNA-1;MSTRG.10860.1
MSTRG.10861	ACOC_0001113701	ACOC_0001113701-mRNA-1;MSTRG.10861.1
MSTRG.10862	ACOC_0001113801	ACOC_0001113801-mRNA-1;MSTRG.10862.1
MSTRG.10865	ACOC_0001114001	ACOC_0001114001-mRNA-1;MSTRG.10865.1
MSTRG.10867	ACOC_0001114301	ACOC_0001114301-mRNA-1;MSTRG.10867.1;MSTRG.10867.3
MSTRG.10868	ACOC_0001114401	ACOC_0001114401-mRNA-1;MSTRG.10868.1
MSTRG.10869	ACOC_0001114501	ACOC_0001114501-mRNA-1;MSTRG.10869.1
MSTRG.1087	ACOC_0000115601	ACOC_0000115601-mRNA-1;MSTRG.1087.1
MSTRG.10870	ACOC_0001114601	ACOC_0001114601-mRNA-1;MSTRG.10870.1
MSTRG.10871	ACOC_0001114701	ACOC_0001114701-mRNA-1;MSTRG.10871.1
MSTRG.10872	ACOC_0001114801	ACOC_0001114801-mRNA-1;MSTRG.10872.1
MSTRG.10873	ACOC_0001114901	ACOC_0001114901-mRNA-1;MSTRG.10873.1
MSTRG.10875	ACOC_0001115001	ACOC_0001115001-mRNA-1;MSTRG.10875.1
MSTRG.10876	ACOC_0001115101	ACOC_0001115101-mRNA-1;MSTRG.10876.1
MSTRG.10877	ACOC_0001115201	ACOC_0001115201-mRNA-1;MSTRG.10877.1
MSTRG.10879	ACOC_0001115401	ACOC_0001115401-mRNA-1;MSTRG.10879.1
MSTRG.1088	ACOC_0000115701	ACOC_0000115701-mRNA-1;MSTRG.1088.1
MSTRG.10881	ACOC_0001115501	ACOC_0001115501-mRNA-1;MSTRG.10881.2
MSTRG.10883	ACOC_0001115601	ACOC_0001115601-mRNA-1;MSTRG.10883.1
MSTRG.10888	ACOC_0001116001	ACOC_0001116001-mRNA-1;MSTRG.10888.1
MSTRG.10890	ACOC_0001116501	ACOC_0001116501-mRNA-1;MSTRG.10890.1;MSTRG.10890.2
MSTRG.10892	ACOC_0001116601	ACOC_0001116601-mRNA-1;MSTRG.10892.1
MSTRG.10894	ACOC_0001116801	ACOC_0001116801-mRNA-1;MSTRG.10894.1;MSTRG.10894.2
MSTRG.10895	ACOC_0001116901	ACOC_0001116901-mRNA-1;MSTRG.10895.1
MSTRG.10896	ACOC_0001117001	ACOC_0001117001-mRNA-1;MSTRG.10896.1
MSTRG.10899	ACOC_0001117101	ACOC_0001117101-mRNA-1;MSTRG.10899.1;MSTRG.10899.3
MSTRG.109	ACOC_0000012801	ACOC_0000012801-mRNA-1;MSTRG.109.1
MSTRG.10901	ACOC_0001117201	ACOC_0001117201-mRNA-1;MSTRG.10901.1
MSTRG.10903	ACOC_0001117301	ACOC_0001117301-mRNA-1;MSTRG.10903.2
MSTRG.10906	ACOC_0001117701	ACOC_0001117701-mRNA-1;MSTRG.10906.2
MSTRG.10908	ACOC_0001117801	ACOC_0001117801-mRNA-1;MSTRG.10908.1
MSTRG.10909	ACOC_0001117901	ACOC_0001117901-mRNA-1;MSTRG.10909.1;MSTRG.10909.3
MSTRG.1091	ACOC_0000115901	ACOC_0000115901-mRNA-1;MSTRG.1091.1
MSTRG.10911	ACOC_0001118201	ACOC_0001118201-mRNA-1;MSTRG.10911.1
MSTRG.10912	ACOC_0001118301	ACOC_0001118301-mRNA-1;MSTRG.10912.2
MSTRG.10916	ACOC_0001118701	ACOC_0001118701-mRNA-1;MSTRG.10916.2
MSTRG.10917	ACOC_0001118901	ACOC_0001118901-mRNA-1;MSTRG.10917.1
MSTRG.10919	ACOC_0001119001	ACOC_0001119001-mRNA-1;MSTRG.10919.2
MSTRG.1092	ACOC_0000116001	ACOC_0000116001-mRNA-1;MSTRG.1092.1
MSTRG.10921	ACOC_0001119101	ACOC_0001119101-mRNA-1;MSTRG.10921.1
MSTRG.10922	ACOC_0001119201	ACOC_0001119201-mRNA-1;MSTRG.10922.2;MSTRG.10922.3
MSTRG.10923	ACOC_0001119301	ACOC_0001119301-mRNA-1;MSTRG.10923.1
MSTRG.10927	ACOC_0001119601	ACOC_0001119601-mRNA-1;MSTRG.10927.1
MSTRG.10929	ACOC_0001119801	ACOC_0001119801-mRNA-1;MSTRG.10929.1
MSTRG.1093	ACOC_0000116101	ACOC_0000116101-mRNA-1;MSTRG.1093.1
MSTRG.10930	ACOC_0001119901	ACOC_0001119901-mRNA-1;MSTRG.10930.2
MSTRG.10931	ACOC_0001120001	ACOC_0001120001-mRNA-1;MSTRG.10931.1
MSTRG.10932	ACOC_0001120101	ACOC_0001120101-mRNA-1;MSTRG.10932.1
MSTRG.10933	ACOC_0001120201	ACOC_0001120201-mRNA-1;MSTRG.10933.1;MSTRG.10933.2
MSTRG.10934	ACOC_0001120301	ACOC_0001120301-mRNA-1;MSTRG.10934.1
MSTRG.10935	ACOC_0001120401	ACOC_0001120401-mRNA-1;MSTRG.10935.1
MSTRG.10936	ACOC_0001120501	ACOC_0001120501-mRNA-1;MSTRG.10936.1
MSTRG.10937	ACOC_0001120601	ACOC_0001120601-mRNA-1;MSTRG.10937.1;MSTRG.10937.3;MSTRG.10937.4;MSTRG.10937.5
MSTRG.10938	ACOC_0001120801	ACOC_0001120801-mRNA-1;MSTRG.10938.1;MSTRG.10938.3
MSTRG.1094	ACOC_0000116201	ACOC_0000116201-mRNA-1;MSTRG.1094.1
MSTRG.10941	ACOC_0001121001	ACOC_0001121001-mRNA-1;MSTRG.10941.1
MSTRG.10943	ACOC_0001121101	ACOC_0001121101-mRNA-1;MSTRG.10943.1
MSTRG.10945	ACOC_0001121601	ACOC_0001121601-mRNA-1;MSTRG.10945.1
MSTRG.10946	ACOC_0001121701	ACOC_0001121701-mRNA-1;MSTRG.10946.1
MSTRG.10948	ACOC_0001121901	ACOC_0001121901-mRNA-1;MSTRG.10948.1
MSTRG.10949	ACOC_0001122001	ACOC_0001122001-mRNA-1;MSTRG.10949.2;MSTRG.10949.3
MSTRG.10952	ACOC_0001122301	ACOC_0001122301-mRNA-1;MSTRG.10952.1
MSTRG.10955	ACOC_0001122401	ACOC_0001122401-mRNA-1;MSTRG.10955.1;MSTRG.10955.3
MSTRG.10959	ACOC_0001122801	ACOC_0001122801-mRNA-1;MSTRG.10959.1;MSTRG.10959.2
MSTRG.10960	ACOC_0001122901	ACOC_0001122901-mRNA-1;MSTRG.10960.1;MSTRG.10960.2;MSTRG.10960.3
MSTRG.10961	ACOC_0001123001	ACOC_0001123001-mRNA-1;MSTRG.10961.1
MSTRG.10963	ACOC_0001123101	ACOC_0001123101-mRNA-1;MSTRG.10963.1;MSTRG.10963.2
MSTRG.10965	ACOC_0001123201	ACOC_0001123201-mRNA-1;MSTRG.10965.1;MSTRG.10965.2
MSTRG.10966	ACOC_0001123301	ACOC_0001123301-mRNA-1;MSTRG.10966.1
MSTRG.10968	ACOC_0001123401	ACOC_0001123401-mRNA-1;MSTRG.10968.1;MSTRG.10968.2;MSTRG.10968.3
MSTRG.1097	ACOC_0000116501	ACOC_0000116501-mRNA-1;MSTRG.1097.1
MSTRG.10971	ACOC_0001123601	ACOC_0001123601-mRNA-1;MSTRG.10971.1;MSTRG.10971.2
MSTRG.10972	ACOC_0001123701	ACOC_0001123701-mRNA-1;MSTRG.10972.1;MSTRG.10972.2
MSTRG.10979	ACOC_0001124601	ACOC_0001124601-mRNA-1;MSTRG.10979.2;MSTRG.10979.3;MSTRG.10979.4
MSTRG.10981	ACOC_0001124701	ACOC_0001124701-mRNA-1;MSTRG.10981.2
MSTRG.10983	ACOC_0001124901	ACOC_0001124901-mRNA-1;MSTRG.10983.1
MSTRG.10984	ACOC_0001125001	ACOC_0001125001-mRNA-1;MSTRG.10984.1;MSTRG.10984.3
MSTRG.10985	ACOC_0001125101	ACOC_0001125101-mRNA-1;MSTRG.10985.2
MSTRG.10986	ACOC_0001125301	ACOC_0001125301-mRNA-1;MSTRG.10986.1
MSTRG.10989	ACOC_0001125701	ACOC_0001125701-mRNA-1;MSTRG.10989.1
MSTRG.1099	ACOC_0000116701	ACOC_0000116701-mRNA-1;MSTRG.1099.2
MSTRG.10991	ACOC_0001126001	ACOC_0001126001-mRNA-1;MSTRG.10991.1
MSTRG.10992	ACOC_0001126201	ACOC_0001126201-mRNA-1;MSTRG.10992.1
MSTRG.10995	ACOC_0001126401	ACOC_0001126401-mRNA-1;MSTRG.10995.2
MSTRG.10996	ACOC_0001126601	ACOC_0001126601-mRNA-1;MSTRG.10996.1
MSTRG.10998	ACOC_0001126801	ACOC_0001126801-mRNA-1;MSTRG.10998.1
MSTRG.10999	ACOC_0001126901	ACOC_0001126901-mRNA-1;MSTRG.10999.1
MSTRG.11	ACOC_0000001101	ACOC_0000001101-mRNA-1;MSTRG.11.1
MSTRG.110	ACOC_0000012901	ACOC_0000012901-mRNA-1;MSTRG.110.1
MSTRG.1100	ACOC_0000117001	ACOC_0000117001-mRNA-1;MSTRG.1100.1
MSTRG.11003	ACOC_0001127301	ACOC_0001127301-mRNA-1;MSTRG.11003.1
MSTRG.11004	ACOC_0001127501	ACOC_0001127501-mRNA-1;MSTRG.11004.1
MSTRG.11005	ACOC_0001127601	ACOC_0001127601-mRNA-1;MSTRG.11005.1
MSTRG.1101	ACOC_0000117101	ACOC_0000117101-mRNA-1;MSTRG.1101.1
MSTRG.11010	ACOC_0001128001	ACOC_0001128001-mRNA-1;MSTRG.11010.1
MSTRG.11011	ACOC_0001128201	ACOC_0001128201-mRNA-1;MSTRG.11011.1
MSTRG.11012	ACOC_0001128301	ACOC_0001128301-mRNA-1;MSTRG.11012.1;MSTRG.11012.3
MSTRG.11013	ACOC_0001128401	ACOC_0001128401-mRNA-1;MSTRG.11013.1
MSTRG.11014	ACOC_0001128501	ACOC_0001128501-mRNA-1;MSTRG.11014.1;MSTRG.11014.3
MSTRG.11015	ACOC_0001128601	ACOC_0001128601-mRNA-1;MSTRG.11015.1
MSTRG.11016	ACOC_0001128701	ACOC_0001128701-mRNA-1;MSTRG.11016.1
MSTRG.11017	ACOC_0001128801	ACOC_0001128801-mRNA-1;MSTRG.11017.1
MSTRG.1102	ACOC_0000117201	ACOC_0000117201-mRNA-1;MSTRG.1102.1
MSTRG.11020	ACOC_0001129101	ACOC_0001129101-mRNA-1;MSTRG.11020.2
MSTRG.11021	ACOC_0001129201	ACOC_0001129201-mRNA-1;MSTRG.11021.2;MSTRG.11021.3
MSTRG.11024	ACOC_0001129501	ACOC_0001129501-mRNA-1;MSTRG.11024.1;MSTRG.11024.3
MSTRG.11025	ACOC_0001129601	ACOC_0001129601-mRNA-1;MSTRG.11025.1
MSTRG.11028	ACOC_0001129901	ACOC_0001129901-mRNA-1;MSTRG.11028.2
MSTRG.11029	ACOC_0001130001	ACOC_0001130001-mRNA-1;MSTRG.11029.1
MSTRG.1103	ACOC_0000117301	ACOC_0000117301-mRNA-1;MSTRG.1103.1
MSTRG.11031	ACOC_0001130101	ACOC_0001130101-mRNA-1;MSTRG.11031.1
MSTRG.11034	ACOC_0001130401	ACOC_0001130401-mRNA-1;MSTRG.11034.1
MSTRG.11035	ACOC_0001130501	ACOC_0001130501-mRNA-1;MSTRG.11035.1
MSTRG.11036	ACOC_0001130601	ACOC_0001130601-mRNA-1;MSTRG.11036.1
MSTRG.11037	ACOC_0001130701	ACOC_0001130701-mRNA-1;MSTRG.11037.1
MSTRG.11039	ACOC_0001130801	ACOC_0001130801-mRNA-1;MSTRG.11039.1
MSTRG.1104	ACOC_0000117401	ACOC_0000117401-mRNA-1;MSTRG.1104.1;MSTRG.1104.3
MSTRG.11041	ACOC_0001130901	ACOC_0001130901-mRNA-1;MSTRG.11041.1
MSTRG.11042	ACOC_0001131001	ACOC_0001131001-mRNA-1;MSTRG.11042.1
MSTRG.11043	ACOC_0001131101	ACOC_0001131101-mRNA-1;MSTRG.11043.1
MSTRG.11044	ACOC_0001131201	ACOC_0001131201-mRNA-1;MSTRG.11044.1
MSTRG.11045	ACOC_0001131301	ACOC_0001131301-mRNA-1;MSTRG.11045.1
MSTRG.11046	ACOC_0001131401	ACOC_0001131401-mRNA-1;MSTRG.11046.1;MSTRG.11046.2
MSTRG.11047	ACOC_0001131501	ACOC_0001131501-mRNA-1;MSTRG.11047.1
MSTRG.11048	ACOC_0001131601	ACOC_0001131601-mRNA-1;MSTRG.11048.1;MSTRG.11048.3
MSTRG.11050	ACOC_0001131701	ACOC_0001131701-mRNA-1;MSTRG.11050.1
MSTRG.11051	ACOC_0001131801	ACOC_0001131801-mRNA-1;MSTRG.11051.2;MSTRG.11051.3;MSTRG.11051.4
MSTRG.11052	ACOC_0001131901	ACOC_0001131901-mRNA-1;MSTRG.11052.2
MSTRG.11053	ACOC_0001132001	ACOC_0001132001-mRNA-1;MSTRG.11053.1;MSTRG.11053.2
MSTRG.11054	ACOC_0001132101	ACOC_0001132101-mRNA-1;MSTRG.11054.1
MSTRG.11055	ACOC_0001132201	ACOC_0001132201-mRNA-1;MSTRG.11055.1;MSTRG.11055.2
MSTRG.11057	ACOC_0001132401	ACOC_0001132401-mRNA-1;MSTRG.11057.2
MSTRG.11058	ACOC_0001132501	ACOC_0001132501-mRNA-1;MSTRG.11058.1
MSTRG.11059	ACOC_0001132601	ACOC_0001132601-mRNA-1;MSTRG.11059.1
MSTRG.1106	ACOC_0000117601	ACOC_0000117601-mRNA-1;MSTRG.1106.1
MSTRG.11060	ACOC_0001132701	ACOC_0001132701-mRNA-1;MSTRG.11060.1
MSTRG.11061	ACOC_0001132801	ACOC_0001132801-mRNA-1;MSTRG.11061.2;MSTRG.11061.3
MSTRG.11062	ACOC_0001132901	ACOC_0001132901-mRNA-1;MSTRG.11062.1
MSTRG.11063	ACOC_0001133001	ACOC_0001133001-mRNA-1;MSTRG.11063.2
MSTRG.11064	ACOC_0001133101	ACOC_0001133101-mRNA-1;MSTRG.11064.1
MSTRG.11065	ACOC_0001133201	ACOC_0001133201-mRNA-1;MSTRG.11065.1
MSTRG.11067	ACOC_0001133301	ACOC_0001133301-mRNA-1;MSTRG.11067.1
MSTRG.11068	ACOC_0001133401	ACOC_0001133401-mRNA-1;MSTRG.11068.1
MSTRG.11069	ACOC_0001133501	ACOC_0001133501-mRNA-1;MSTRG.11069.1
MSTRG.1107	ACOC_0000117701	ACOC_0000117701-mRNA-1;MSTRG.1107.1
MSTRG.11070	ACOC_0001133601	ACOC_0001133601-mRNA-1;MSTRG.11070.2
MSTRG.11073	ACOC_0001133901	ACOC_0001133901-mRNA-1;MSTRG.11073.1;MSTRG.11073.2
MSTRG.11074	ACOC_0001134001	ACOC_0001134001-mRNA-1;MSTRG.11074.1
MSTRG.11075	ACOC_0001134201	ACOC_0001134201-mRNA-1;MSTRG.11075.1
MSTRG.11077	ACOC_0001134301	ACOC_0001134301-mRNA-1;MSTRG.11077.1
MSTRG.11079	ACOC_0001134601	ACOC_0001134601-mRNA-1;MSTRG.11079.1
MSTRG.1108	ACOC_0000117801	ACOC_0000117801-mRNA-1;MSTRG.1108.1
MSTRG.11080	ACOC_0001134701	ACOC_0001134701-mRNA-1;MSTRG.11080.1
MSTRG.11081	ACOC_0001134801	ACOC_0001134801-mRNA-1;MSTRG.11081.1
MSTRG.11082	ACOC_0001134901	ACOC_0001134901-mRNA-1;MSTRG.11082.1;MSTRG.11082.2
MSTRG.11083	ACOC_0001135001	ACOC_0001135001-mRNA-1;MSTRG.11083.1
MSTRG.11087	ACOC_0001135401	ACOC_0001135401-mRNA-1;MSTRG.11087.1;MSTRG.11087.3
MSTRG.11089	ACOC_0001135701	ACOC_0001135701-mRNA-1;MSTRG.11089.1
MSTRG.1109	ACOC_0000117901	ACOC_0000117901-mRNA-1;MSTRG.1109.1;MSTRG.1109.2;MSTRG.1109.3;MSTRG.1109.4
MSTRG.11090	ACOC_0001135801	ACOC_0001135801-mRNA-1;MSTRG.11090.1;MSTRG.11090.3
MSTRG.11095	ACOC_0001136301	ACOC_0001136301-mRNA-1;MSTRG.11095.1
MSTRG.11096	ACOC_0001136401	ACOC_0001136401-mRNA-1;MSTRG.11096.1
MSTRG.11097	ACOC_0001136501	ACOC_0001136501-mRNA-1;MSTRG.11097.2
MSTRG.11098	ACOC_0001136601	ACOC_0001136601-mRNA-1;MSTRG.11098.1;MSTRG.11098.2
MSTRG.111	ACOC_0000013001	ACOC_0000013001-mRNA-1;MSTRG.111.1
MSTRG.11101	ACOC_0001136901	ACOC_0001136901-mRNA-1;MSTRG.11101.2
MSTRG.11104	ACOC_0001137001	ACOC_0001137001-mRNA-1;MSTRG.11104.1
MSTRG.11105	ACOC_0001137101	ACOC_0001137101-mRNA-1;MSTRG.11105.1
MSTRG.11108	ACOC_0001137501	ACOC_0001137501-mRNA-1;MSTRG.11108.1
MSTRG.1111	ACOC_0000118001	ACOC_0000118001-mRNA-1;MSTRG.1111.1;MSTRG.1111.3
MSTRG.11110	ACOC_0001137701	ACOC_0001137701-mRNA-1;MSTRG.11110.1
MSTRG.11111	ACOC_0001137801	ACOC_0001137801-mRNA-1;MSTRG.11111.1
MSTRG.11112	ACOC_0001137901	ACOC_0001137901-mRNA-1;MSTRG.11112.2
MSTRG.11113	ACOC_0001138001	ACOC_0001138001-mRNA-1;MSTRG.11113.1
MSTRG.11114	ACOC_0001138201	ACOC_0001138201-mRNA-1;MSTRG.11114.1
MSTRG.11118	ACOC_0001138701	ACOC_0001138701-mRNA-1;MSTRG.11118.1
MSTRG.11119	ACOC_0001138801	ACOC_0001138801-mRNA-1;MSTRG.11119.1
MSTRG.11120	ACOC_0001138901	ACOC_0001138901-mRNA-1;MSTRG.11120.1
MSTRG.11121	ACOC_0001139101	ACOC_0001139101-mRNA-1;MSTRG.11121.1
MSTRG.11122	ACOC_0001139201	ACOC_0001139201-mRNA-1;MSTRG.11122.1;MSTRG.11122.2
MSTRG.11123	ACOC_0001139301	ACOC_0001139301-mRNA-1;MSTRG.11123.2
MSTRG.11124	ACOC_0001139401	ACOC_0001139401-mRNA-1;MSTRG.11124.1
MSTRG.11126	ACOC_0001139501	ACOC_0001139501-mRNA-1;MSTRG.11126.1
MSTRG.11128	ACOC_0001139801	ACOC_0001139801-mRNA-1;MSTRG.11128.1
MSTRG.11129	ACOC_0001139901	ACOC_0001139901-mRNA-1;MSTRG.11129.2;MSTRG.11129.3
MSTRG.1113	ACOC_0000118201	ACOC_0000118201-mRNA-1;MSTRG.1113.1
MSTRG.11131	ACOC_0001140101	ACOC_0001140101-mRNA-1;MSTRG.11131.1
MSTRG.11132	ACOC_0001140201	ACOC_0001140201-mRNA-1;MSTRG.11132.1
MSTRG.11133	ACOC_0001140301	ACOC_0001140301-mRNA-1;MSTRG.11133.1
MSTRG.11134	ACOC_0001140401	ACOC_0001140401-mRNA-1;MSTRG.11134.2
MSTRG.11136	ACOC_0001140701	ACOC_0001140701-mRNA-1;MSTRG.11136.1
MSTRG.11137	ACOC_0001140801	ACOC_0001140801-mRNA-1;MSTRG.11137.1
MSTRG.11138	ACOC_0001140901	ACOC_0001140901-mRNA-1;MSTRG.11138.1
MSTRG.11139	ACOC_0001141001	ACOC_0001141001-mRNA-1;MSTRG.11139.1;MSTRG.11139.2
MSTRG.11140	ACOC_0001141101	ACOC_0001141101-mRNA-1;MSTRG.11140.1
MSTRG.11141	ACOC_0001141201	ACOC_0001141201-mRNA-1;MSTRG.11141.1
MSTRG.11142	ACOC_0001141301	ACOC_0001141301-mRNA-1;MSTRG.11142.1
MSTRG.11143	ACOC_0001141401	ACOC_0001141401-mRNA-1;MSTRG.11143.1
MSTRG.11144	ACOC_0001141701	ACOC_0001141701-mRNA-1;MSTRG.11144.1
MSTRG.11146	ACOC_0001141901	ACOC_0001141901-mRNA-1;MSTRG.11146.1
MSTRG.11148	ACOC_0001142301	ACOC_0001142301-mRNA-1;MSTRG.11148.1;MSTRG.11148.2;MSTRG.11148.4
MSTRG.1115	ACOC_0000118501	ACOC_0000118501-mRNA-1;MSTRG.1115.1
MSTRG.11150	ACOC_0001142501	ACOC_0001142501-mRNA-1;MSTRG.11150.1
MSTRG.11151	ACOC_0001142601	ACOC_0001142601-mRNA-1;MSTRG.11151.1
MSTRG.11152	ACOC_0001142701	ACOC_0001142701-mRNA-1;MSTRG.11152.1;MSTRG.11152.3
MSTRG.11154	ACOC_0001143001	ACOC_0001143001-mRNA-1;MSTRG.11154.1
MSTRG.11155	ACOC_0001143101	ACOC_0001143101-mRNA-1;MSTRG.11155.1
MSTRG.11156	ACOC_0001143201	ACOC_0001143201-mRNA-1;MSTRG.11156.1
MSTRG.11157	ACOC_0001143301	ACOC_0001143301-mRNA-1;MSTRG.11157.1
MSTRG.11158	ACOC_0001143401	ACOC_0001143401-mRNA-1;MSTRG.11158.1
MSTRG.1116	ACOC_0000118601	ACOC_0000118601-mRNA-1;MSTRG.1116.1
MSTRG.11160	ACOC_0001143501	ACOC_0001143501-mRNA-1;MSTRG.11160.1
MSTRG.11164	ACOC_0001144001	ACOC_0001144001-mRNA-1;MSTRG.11164.1
MSTRG.11165	ACOC_0001144101	ACOC_0001144101-mRNA-1;MSTRG.11165.1;MSTRG.11165.2
MSTRG.11166	ACOC_0001144201	ACOC_0001144201-mRNA-1;MSTRG.11166.1
MSTRG.11167	ACOC_0001144401	ACOC_0001144401-mRNA-1;MSTRG.11167.1
MSTRG.11168	ACOC_0001144501	ACOC_0001144501-mRNA-1;MSTRG.11168.1;MSTRG.11168.2
MSTRG.11169	ACOC_0001144601	ACOC_0001144601-mRNA-1;MSTRG.11169.2;MSTRG.11169.3
MSTRG.1117	ACOC_0000118701	ACOC_0000118701-mRNA-1;MSTRG.1117.1
MSTRG.11170	ACOC_0001144701	ACOC_0001144701-mRNA-1;MSTRG.11170.1;MSTRG.11170.3
MSTRG.11171	ACOC_0001144801	ACOC_0001144801-mRNA-1;MSTRG.11171.1
MSTRG.11172	ACOC_0001144901	ACOC_0001144901-mRNA-1;MSTRG.11172.1
MSTRG.11174	ACOC_0001145001	ACOC_0001145001-mRNA-1;MSTRG.11174.1
MSTRG.11177	ACOC_0001145401	ACOC_0001145401-mRNA-1;MSTRG.11177.1
MSTRG.11178	ACOC_0001145501	ACOC_0001145501-mRNA-1;MSTRG.11178.2;MSTRG.11178.3
MSTRG.11179	ACOC_0001145601	ACOC_0001145601-mRNA-1;MSTRG.11179.2
MSTRG.1118	ACOC_0000118801	ACOC_0000118801-mRNA-1;MSTRG.1118.1
MSTRG.11180	ACOC_0001145701	ACOC_0001145701-mRNA-1;MSTRG.11180.1
MSTRG.11181	ACOC_0001145801	ACOC_0001145801-mRNA-1;MSTRG.11181.1
MSTRG.11183	ACOC_0001145901	ACOC_0001145901-mRNA-1;MSTRG.11183.1;MSTRG.11183.2
MSTRG.11184	ACOC_0001146001	ACOC_0001146001-mRNA-1;MSTRG.11184.1
MSTRG.11185	ACOC_0001146101	ACOC_0001146101-mRNA-1;MSTRG.11185.1
MSTRG.11187	ACOC_0001146301	ACOC_0001146301-mRNA-1;MSTRG.11187.1
MSTRG.11188	ACOC_0001146401	ACOC_0001146401-mRNA-1;MSTRG.11188.1
MSTRG.11189	ACOC_0001146501	ACOC_0001146501-mRNA-1;MSTRG.11189.1
MSTRG.1119	ACOC_0000118901	ACOC_0000118901-mRNA-1;MSTRG.1119.1
MSTRG.11192	ACOC_0001146801	ACOC_0001146801-mRNA-1;MSTRG.11192.1
MSTRG.11194	ACOC_0001147001	ACOC_0001147001-mRNA-1;MSTRG.11194.1
MSTRG.11196	ACOC_0001147201	ACOC_0001147201-mRNA-1;MSTRG.11196.1
MSTRG.11198	ACOC_0001147601	ACOC_0001147601-mRNA-1;MSTRG.11198.1;MSTRG.11198.2
MSTRG.11199	ACOC_0001147701	ACOC_0001147701-mRNA-1;MSTRG.11199.1
MSTRG.112	ACOC_0000013101	ACOC_0000013101-mRNA-1;MSTRG.112.1
MSTRG.1120	ACOC_0000119001	ACOC_0000119001-mRNA-1;MSTRG.1120.1
MSTRG.11200	ACOC_0001147801	ACOC_0001147801-mRNA-1;MSTRG.11200.1;MSTRG.11200.2
MSTRG.11201	ACOC_0001148001	ACOC_0001148001-mRNA-1;MSTRG.11201.1
MSTRG.11204	ACOC_0001148201	ACOC_0001148201-mRNA-1;MSTRG.11204.1
MSTRG.11205	ACOC_0001148301	ACOC_0001148301-mRNA-1;MSTRG.11205.1
MSTRG.11206	ACOC_0001148401	ACOC_0001148401-mRNA-1;MSTRG.11206.1;MSTRG.11206.3;MSTRG.11206.4
MSTRG.11207	ACOC_0001148501	ACOC_0001148501-mRNA-1;MSTRG.11207.1
MSTRG.11208	ACOC_0001148601	ACOC_0001148601-mRNA-1;MSTRG.11208.2
MSTRG.11209	ACOC_0001148701	ACOC_0001148701-mRNA-1;MSTRG.11209.1;MSTRG.11209.2;MSTRG.11209.3;MSTRG.11209.5
MSTRG.1121	ACOC_0000119101	ACOC_0000119101-mRNA-1;MSTRG.1121.1
MSTRG.11210	ACOC_0001148801	ACOC_0001148801-mRNA-1;MSTRG.11210.1
MSTRG.11211	ACOC_0001148901	ACOC_0001148901-mRNA-1;MSTRG.11211.1
MSTRG.11212	ACOC_0001149001	ACOC_0001149001-mRNA-1;MSTRG.11212.1;MSTRG.11212.2
MSTRG.11215	ACOC_0001149401	ACOC_0001149401-mRNA-1;MSTRG.11215.1
MSTRG.11216	ACOC_0001149501	ACOC_0001149501-mRNA-1;MSTRG.11216.1
MSTRG.11218	ACOC_0001149701	ACOC_0001149701-mRNA-1;MSTRG.11218.1
MSTRG.1122	ACOC_0000119201	ACOC_0000119201-mRNA-1;MSTRG.1122.1
MSTRG.11220	ACOC_0001149801	ACOC_0001149801-mRNA-1;MSTRG.11220.1
MSTRG.11221	ACOC_0001149901	ACOC_0001149901-mRNA-1;MSTRG.11221.1
MSTRG.11222	ACOC_0001150101	ACOC_0001150101-mRNA-1;MSTRG.11222.1
MSTRG.11223	ACOC_0001150201	ACOC_0001150201-mRNA-1;MSTRG.11223.1
MSTRG.11224	ACOC_0001150301	ACOC_0001150301-mRNA-1;MSTRG.11224.1;MSTRG.11224.2
MSTRG.11225	ACOC_0001150401	ACOC_0001150401-mRNA-1;MSTRG.11225.1
MSTRG.11227	ACOC_0001150601	ACOC_0001150601-mRNA-1;MSTRG.11227.1
MSTRG.11229	ACOC_0001150701	ACOC_0001150701-mRNA-1;MSTRG.11229.1
MSTRG.11231	ACOC_0001150901	ACOC_0001150901-mRNA-1;MSTRG.11231.1;MSTRG.11231.2;MSTRG.11231.3
MSTRG.11233	ACOC_0001151101	ACOC_0001151101-mRNA-1;MSTRG.11233.1
MSTRG.11234	ACOC_0001151201	ACOC_0001151201-mRNA-1;MSTRG.11234.1;MSTRG.11234.2
MSTRG.1124	ACOC_0000119501	ACOC_0000119501-mRNA-1;MSTRG.1124.1;MSTRG.1124.2
MSTRG.11240	ACOC_0001152101	ACOC_0001152101-mRNA-1;MSTRG.11240.1
MSTRG.11242	ACOC_0001152201	ACOC_0001152201-mRNA-1;MSTRG.11242.1
MSTRG.11243	ACOC_0001152401	ACOC_0001152401-mRNA-1;MSTRG.11243.2
MSTRG.11244	ACOC_0001152501	ACOC_0001152501-mRNA-1;MSTRG.11244.1
MSTRG.11245	ACOC_0001152601	ACOC_0001152601-mRNA-1;MSTRG.11245.1
MSTRG.11247	ACOC_0001152701	ACOC_0001152701-mRNA-1;MSTRG.11247.1
MSTRG.11249	ACOC_0001152801	ACOC_0001152801-mRNA-1;MSTRG.11249.1
MSTRG.11250	ACOC_0001152901	ACOC_0001152901-mRNA-1;MSTRG.11250.2
MSTRG.11253	ACOC_0001153601	ACOC_0001153601-mRNA-1;MSTRG.11253.1
MSTRG.11257	ACOC_0001153901	ACOC_0001153901-mRNA-1;MSTRG.11257.1
MSTRG.11260	ACOC_0001154401	ACOC_0001154401-mRNA-1;MSTRG.11260.1
MSTRG.11262	ACOC_0001154801	ACOC_0001154801-mRNA-1;MSTRG.11262.1
MSTRG.11263	ACOC_0001154901	ACOC_0001154901-mRNA-1;MSTRG.11263.1
MSTRG.11266	ACOC_0001155201	ACOC_0001155201-mRNA-1;MSTRG.11266.1;MSTRG.11266.3
MSTRG.1127	ACOC_0000119901	ACOC_0000119901-mRNA-1;MSTRG.1127.2
MSTRG.11270	ACOC_0001155501	ACOC_0001155501-mRNA-1;MSTRG.11270.1
MSTRG.11271	ACOC_0001155601	ACOC_0001155601-mRNA-1;MSTRG.11271.1
MSTRG.11272	ACOC_0001155701	ACOC_0001155701-mRNA-1;MSTRG.11272.1
MSTRG.11273	ACOC_0001155801	ACOC_0001155801-mRNA-1;MSTRG.11273.1
MSTRG.11274	ACOC_0001155901	ACOC_0001155901-mRNA-1;MSTRG.11274.2
MSTRG.11277	ACOC_0001156301	ACOC_0001156301-mRNA-1;MSTRG.11277.2;MSTRG.11277.3
MSTRG.11279	ACOC_0001156601	ACOC_0001156601-mRNA-1;MSTRG.11279.1
MSTRG.11280	ACOC_0001156701	ACOC_0001156701-mRNA-1;MSTRG.11280.1
MSTRG.11282	ACOC_0001157001	ACOC_0001157001-mRNA-1;MSTRG.11282.1
MSTRG.11283	ACOC_0001157101	ACOC_0001157101-mRNA-1;MSTRG.11283.1
MSTRG.11284	ACOC_0001157201	ACOC_0001157201-mRNA-1;MSTRG.11284.1
MSTRG.11285	ACOC_0001157301	ACOC_0001157301-mRNA-1;MSTRG.11285.1
MSTRG.11286	ACOC_0001157401	ACOC_0001157401-mRNA-1;MSTRG.11286.1
MSTRG.11289	ACOC_0001157601	ACOC_0001157601-mRNA-1;MSTRG.11289.2
MSTRG.1129	ACOC_0000120001	ACOC_0000120001-mRNA-1;MSTRG.1129.1;MSTRG.1129.2;MSTRG.1129.4
MSTRG.11290	ACOC_0001157701	ACOC_0001157701-mRNA-1;MSTRG.11290.1
MSTRG.11291	ACOC_0001157801	ACOC_0001157801-mRNA-1;MSTRG.11291.1
MSTRG.11293	ACOC_0001158001	ACOC_0001158001-mRNA-1;MSTRG.11293.2
MSTRG.11294	ACOC_0001158101	ACOC_0001158101-mRNA-1;MSTRG.11294.1
MSTRG.11295	ACOC_0001158201	ACOC_0001158201-mRNA-1;MSTRG.11295.1
MSTRG.11297	ACOC_0001158401	ACOC_0001158401-mRNA-1;MSTRG.11297.1;MSTRG.11297.3
MSTRG.11298	ACOC_0001158501	ACOC_0001158501-mRNA-1;MSTRG.11298.1;MSTRG.11298.3
MSTRG.113	ACOC_0000013201	ACOC_0000013201-mRNA-1;MSTRG.113.1
MSTRG.1130	ACOC_0000120101	ACOC_0000120101-mRNA-1;MSTRG.1130.1
MSTRG.11300	ACOC_0001158801	ACOC_0001158801-mRNA-1;MSTRG.11300.2
MSTRG.11302	ACOC_0001158901	ACOC_0001158901-mRNA-1;MSTRG.11302.1
MSTRG.11304	ACOC_0001159101	ACOC_0001159101-mRNA-1;MSTRG.11304.1
MSTRG.11307	ACOC_0001159201	ACOC_0001159201-mRNA-1;MSTRG.11307.2
MSTRG.11308	ACOC_0001159301	ACOC_0001159301-mRNA-1;MSTRG.11308.1
MSTRG.11309	ACOC_0001159401	ACOC_0001159401-mRNA-1;MSTRG.11309.2
MSTRG.11310	ACOC_0001159501	ACOC_0001159501-mRNA-1;MSTRG.11310.1;MSTRG.11310.2
MSTRG.11312	ACOC_0001159601	ACOC_0001159601-mRNA-1;MSTRG.11312.1
MSTRG.11315	ACOC_0001159901	ACOC_0001159901-mRNA-1;MSTRG.11315.1;MSTRG.11315.3;MSTRG.11315.4
MSTRG.11316	ACOC_0001160001	ACOC_0001160001-mRNA-1;MSTRG.11316.1
MSTRG.11317	ACOC_0001160401	ACOC_0001160401-mRNA-1;MSTRG.11317.1
MSTRG.1132	ACOC_0000120201	ACOC_0000120201-mRNA-1;MSTRG.1132.1
MSTRG.11321	ACOC_0001160701	ACOC_0001160701-mRNA-1;MSTRG.11321.1
MSTRG.11322	ACOC_0001160801	ACOC_0001160801-mRNA-1;MSTRG.11322.1
MSTRG.11324	ACOC_0001161001	ACOC_0001161001-mRNA-1;MSTRG.11324.1
MSTRG.11325	ACOC_0001161101	ACOC_0001161101-mRNA-1;MSTRG.11325.1
MSTRG.11326	ACOC_0001161201	ACOC_0001161201-mRNA-1;MSTRG.11326.1
MSTRG.11327	ACOC_0001161301	ACOC_0001161301-mRNA-1;MSTRG.11327.1
MSTRG.11328	ACOC_0001161401	ACOC_0001161401-mRNA-1;MSTRG.11328.1
MSTRG.11337	ACOC_0001162801	ACOC_0001162801-mRNA-1;MSTRG.11337.1
MSTRG.11338	ACOC_0001162901	ACOC_0001162901-mRNA-1;MSTRG.11338.1;MSTRG.11338.2;MSTRG.11338.3
MSTRG.1134	ACOC_0000120501	ACOC_0000120501-mRNA-1;MSTRG.1134.1
MSTRG.11340	ACOC_0001163201	ACOC_0001163201-mRNA-1;MSTRG.11340.1
MSTRG.11342	ACOC_0001163301	ACOC_0001163301-mRNA-1;MSTRG.11342.2;MSTRG.11342.3;MSTRG.11342.4
MSTRG.11345	ACOC_0001163401	ACOC_0001163401-mRNA-1;MSTRG.11345.1;MSTRG.11345.2
MSTRG.11346	ACOC_0001163501	ACOC_0001163501-mRNA-1;MSTRG.11346.1
MSTRG.11348	ACOC_0001163701	ACOC_0001163701-mRNA-1;MSTRG.11348.2
MSTRG.11350	ACOC_0001163901	ACOC_0001163901-mRNA-1;MSTRG.11350.1
MSTRG.11351	ACOC_0001164001	ACOC_0001164001-mRNA-1;MSTRG.11351.1
MSTRG.11352	ACOC_0001164101	ACOC_0001164101-mRNA-1;MSTRG.11352.2
MSTRG.11353	ACOC_0001164201	ACOC_0001164201-mRNA-1;MSTRG.11353.1
MSTRG.11356	ACOC_0001164301	ACOC_0001164301-mRNA-1;MSTRG.11356.1
MSTRG.11359	ACOC_0001164501	ACOC_0001164501-mRNA-1;MSTRG.11359.1;MSTRG.11359.3
MSTRG.1136	ACOC_0000120601	ACOC_0000120601-mRNA-1;MSTRG.1136.1
MSTRG.11360	ACOC_0001164601	ACOC_0001164601-mRNA-1;MSTRG.11360.1;MSTRG.11360.2
MSTRG.11362	ACOC_0001164901	ACOC_0001164901-mRNA-1;MSTRG.11362.1
MSTRG.11363	ACOC_0001165001	ACOC_0001165001-mRNA-1;MSTRG.11363.1
MSTRG.11364	ACOC_0001165101	ACOC_0001165101-mRNA-1;MSTRG.11364.1;MSTRG.11364.2
MSTRG.11367	ACOC_0001165201	ACOC_0001165201-mRNA-1;MSTRG.11367.2
MSTRG.11368	ACOC_0001165301	ACOC_0001165301-mRNA-1;MSTRG.11368.1
MSTRG.1137	ACOC_0000120701	ACOC_0000120701-mRNA-1;MSTRG.1137.1
MSTRG.11371	ACOC_0001165701	ACOC_0001165701-mRNA-1;MSTRG.11371.1;MSTRG.11371.2
MSTRG.11372	ACOC_0001165901	ACOC_0001165901-mRNA-1;MSTRG.11372.1
MSTRG.11374	ACOC_0001166001	ACOC_0001166001-mRNA-1;MSTRG.11374.1
MSTRG.11375	ACOC_0001166101	ACOC_0001166101-mRNA-1;MSTRG.11375.1;MSTRG.11375.2;MSTRG.11375.3;MSTRG.11375.4
MSTRG.11377	ACOC_0001166301	ACOC_0001166301-mRNA-1;MSTRG.11377.1
MSTRG.11378	ACOC_0001166401	ACOC_0001166401-mRNA-1;MSTRG.11378.1
MSTRG.11379	ACOC_0001166501	ACOC_0001166501-mRNA-1;MSTRG.11379.1;MSTRG.11379.3;MSTRG.11379.4
MSTRG.11380	ACOC_0001166601	ACOC_0001166601-mRNA-1;MSTRG.11380.1
MSTRG.11383	ACOC_0001166701	ACOC_0001166701-mRNA-1;MSTRG.11383.1;MSTRG.11383.2
MSTRG.11384	ACOC_0001166801	ACOC_0001166801-mRNA-1;MSTRG.11384.1
MSTRG.11387	ACOC_0001167001	ACOC_0001167001-mRNA-1;MSTRG.11387.1
MSTRG.11388	ACOC_0001167101	ACOC_0001167101-mRNA-1;MSTRG.11388.1;MSTRG.11388.3
MSTRG.11389	ACOC_0001167201	ACOC_0001167201-mRNA-1;MSTRG.11389.1
MSTRG.1139	ACOC_0000120801	ACOC_0000120801-mRNA-1;MSTRG.1139.1
MSTRG.11393	ACOC_0001167301	ACOC_0001167301-mRNA-1;MSTRG.11393.1
MSTRG.11395	ACOC_0001167801	ACOC_0001167801-mRNA-1;MSTRG.11395.2
MSTRG.11397	ACOC_0001168001	ACOC_0001168001-mRNA-1;MSTRG.11397.1
MSTRG.11399	ACOC_0001168201	ACOC_0001168201-mRNA-1;MSTRG.11399.2
MSTRG.114	ACOC_0000013301	ACOC_0000013301-mRNA-1;MSTRG.114.1
MSTRG.1140	ACOC_0000120901	ACOC_0000120901-mRNA-1;MSTRG.1140.1;MSTRG.1140.2
MSTRG.11400	ACOC_0001168301	ACOC_0001168301-mRNA-1;MSTRG.11400.1;MSTRG.11400.2
MSTRG.11401	ACOC_0001168401	ACOC_0001168401-mRNA-1;MSTRG.11401.1
MSTRG.11402	ACOC_0001168501	ACOC_0001168501-mRNA-1;MSTRG.11402.1
MSTRG.11403	ACOC_0001168601	ACOC_0001168601-mRNA-1;MSTRG.11403.1
MSTRG.11404	ACOC_0001168701	ACOC_0001168701-mRNA-1;MSTRG.11404.1
MSTRG.11407	ACOC_0001168901	ACOC_0001168901-mRNA-1;MSTRG.11407.1
MSTRG.11410	ACOC_0001169201	ACOC_0001169201-mRNA-1;MSTRG.11410.1
MSTRG.11411	ACOC_0001169301	ACOC_0001169301-mRNA-1;MSTRG.11411.1
MSTRG.11412	ACOC_0001169401	ACOC_0001169401-mRNA-1;MSTRG.11412.1
MSTRG.11414	ACOC_0001169501	ACOC_0001169501-mRNA-1;MSTRG.11414.1;MSTRG.11414.2
MSTRG.11415	ACOC_0001169601	ACOC_0001169601-mRNA-1;MSTRG.11415.1;MSTRG.11415.2
MSTRG.11417	ACOC_0001169701	ACOC_0001169701-mRNA-1;MSTRG.11417.2
MSTRG.1142	ACOC_0000121201	ACOC_0000121201-mRNA-1;MSTRG.1142.1
MSTRG.11425	ACOC_0001169801	ACOC_0001169801-mRNA-1;MSTRG.11425.1
MSTRG.11426	ACOC_0001169901	ACOC_0001169901-mRNA-1;MSTRG.11426.1;MSTRG.11426.2
MSTRG.11427	ACOC_0001170001	ACOC_0001170001-mRNA-1;MSTRG.11427.1
MSTRG.11428	ACOC_0001170101	ACOC_0001170101-mRNA-1;MSTRG.11428.1
MSTRG.11430	ACOC_0001170401	ACOC_0001170401-mRNA-1;MSTRG.11430.1
MSTRG.11431	ACOC_0001170501	ACOC_0001170501-mRNA-1;MSTRG.11431.1
MSTRG.11433	ACOC_0001170801	ACOC_0001170801-mRNA-1;MSTRG.11433.1
MSTRG.11438	ACOC_0001171201	ACOC_0001171201-mRNA-1;MSTRG.11438.1;MSTRG.11438.2
MSTRG.1144	ACOC_0000121501	ACOC_0000121501-mRNA-1;MSTRG.1144.1
MSTRG.11440	ACOC_0001171501	ACOC_0001171501-mRNA-1;MSTRG.11440.2
MSTRG.11442	ACOC_0001171701	ACOC_0001171701-mRNA-1;MSTRG.11442.1
MSTRG.11443	ACOC_0001171801	ACOC_0001171801-mRNA-1;MSTRG.11443.1;MSTRG.11443.2
MSTRG.11445	ACOC_0001172001	ACOC_0001172001-mRNA-1;MSTRG.11445.1
MSTRG.11446	ACOC_0001172101	ACOC_0001172101-mRNA-1;MSTRG.11446.1
MSTRG.11447	ACOC_0001172201	ACOC_0001172201-mRNA-1;MSTRG.11447.1;MSTRG.11447.2
MSTRG.11448	ACOC_0001172301	ACOC_0001172301-mRNA-1;MSTRG.11448.1;MSTRG.11448.2
MSTRG.1145	ACOC_0000121601	ACOC_0000121601-mRNA-1;MSTRG.1145.1
MSTRG.11450	ACOC_0001172401	ACOC_0001172401-mRNA-1;MSTRG.11450.1;MSTRG.11450.2
MSTRG.11452	ACOC_0001172501	ACOC_0001172501-mRNA-1;MSTRG.11452.1
MSTRG.11456	ACOC_0001172801	ACOC_0001172801-mRNA-1;MSTRG.11456.1
MSTRG.11458	ACOC_0001173001	ACOC_0001173001-mRNA-1;MSTRG.11458.1;MSTRG.11458.2
MSTRG.11459	ACOC_0001173101	ACOC_0001173101-mRNA-1;MSTRG.11459.1
MSTRG.1146	ACOC_0000121701	ACOC_0000121701-mRNA-1;MSTRG.1146.1
MSTRG.11460	ACOC_0001173201	ACOC_0001173201-mRNA-1;MSTRG.11460.2
MSTRG.11463	ACOC_0001173601	ACOC_0001173601-mRNA-1;MSTRG.11463.1;MSTRG.11463.2
MSTRG.11464	ACOC_0001173701	ACOC_0001173701-mRNA-1;MSTRG.11464.1
MSTRG.11465	ACOC_0001173801	ACOC_0001173801-mRNA-1;MSTRG.11465.1
MSTRG.11466	ACOC_0001174101	ACOC_0001174101-mRNA-1;MSTRG.11466.1
MSTRG.11470	ACOC_0001174501	ACOC_0001174501-mRNA-1;MSTRG.11470.1
MSTRG.11471	ACOC_0001174601	ACOC_0001174601-mRNA-1;MSTRG.11471.1
MSTRG.11472	ACOC_0001174901	ACOC_0001174901-mRNA-1;MSTRG.11472.1;MSTRG.11472.3
MSTRG.11474	ACOC_0001175001	ACOC_0001175001-mRNA-1;MSTRG.11474.2;MSTRG.11474.3;MSTRG.11474.4
MSTRG.11475	ACOC_0001175101	ACOC_0001175101-mRNA-1;MSTRG.11475.1
MSTRG.11477	ACOC_0001175201	ACOC_0001175201-mRNA-1;MSTRG.11477.1
MSTRG.11478	ACOC_0001175301	ACOC_0001175301-mRNA-1;MSTRG.11478.2
MSTRG.1148	ACOC_0000122001	ACOC_0000122001-mRNA-1;MSTRG.1148.1
MSTRG.11480	ACOC_0001175401	ACOC_0001175401-mRNA-1;MSTRG.11480.1
MSTRG.11481	ACOC_0001175501	ACOC_0001175501-mRNA-1;MSTRG.11481.2
MSTRG.11483	ACOC_0001175601	ACOC_0001175601-mRNA-1;MSTRG.11483.1
MSTRG.11484	ACOC_0001175701	ACOC_0001175701-mRNA-1;MSTRG.11484.1
MSTRG.11486	ACOC_0001176101	ACOC_0001176101-mRNA-1;MSTRG.11486.1
MSTRG.11489	ACOC_0001176501	ACOC_0001176501-mRNA-1;MSTRG.11489.1
MSTRG.11490	ACOC_0001176601	ACOC_0001176601-mRNA-1;MSTRG.11490.1;MSTRG.11490.2
MSTRG.11491	ACOC_0001176701	ACOC_0001176701-mRNA-1;MSTRG.11491.2
MSTRG.11495	ACOC_0001177101	ACOC_0001177101-mRNA-1;MSTRG.11495.1
MSTRG.11496	ACOC_0001177201	ACOC_0001177201-mRNA-1;MSTRG.11496.1;MSTRG.11496.2;MSTRG.11496.3;MSTRG.11496.4
MSTRG.11497	ACOC_0001177301	ACOC_0001177301-mRNA-1;MSTRG.11497.1
MSTRG.11498	ACOC_0001177401	ACOC_0001177401-mRNA-1;MSTRG.11498.1;MSTRG.11498.2;MSTRG.11498.3
MSTRG.11499	ACOC_0001177501	ACOC_0001177501-mRNA-1;MSTRG.11499.2
MSTRG.1150	ACOC_0000122201	ACOC_0000122201-mRNA-1;MSTRG.1150.2
MSTRG.11500	ACOC_0001177601	ACOC_0001177601-mRNA-1;MSTRG.11500.2
MSTRG.11501	ACOC_0001177701	ACOC_0001177701-mRNA-1;MSTRG.11501.2
MSTRG.11504	ACOC_0001177801	ACOC_0001177801-mRNA-1;MSTRG.11504.2
MSTRG.11505	ACOC_0001177901	ACOC_0001177901-mRNA-1;MSTRG.11505.1
MSTRG.11507	ACOC_0001178001	ACOC_0001178001-mRNA-1;MSTRG.11507.1;MSTRG.11507.2;MSTRG.11507.3;MSTRG.11507.4
MSTRG.11508	ACOC_0001178101	ACOC_0001178101-mRNA-1;MSTRG.11508.1
MSTRG.11510	ACOC_0001178401	ACOC_0001178401-mRNA-1;MSTRG.11510.1
MSTRG.11512	ACOC_0001178601	ACOC_0001178601-mRNA-1;MSTRG.11512.1
MSTRG.11513	ACOC_0001178701	ACOC_0001178701-mRNA-1;MSTRG.11513.1
MSTRG.11516	ACOC_0001179201	ACOC_0001179201-mRNA-1;MSTRG.11516.2
MSTRG.11517	ACOC_0001179301	ACOC_0001179301-mRNA-1;MSTRG.11517.1
MSTRG.11518	ACOC_0001179401	ACOC_0001179401-mRNA-1;MSTRG.11518.1;MSTRG.11518.2;MSTRG.11518.3
MSTRG.11519	ACOC_0001179701	ACOC_0001179701-mRNA-1;MSTRG.11519.1
MSTRG.1152	ACOC_0000122301	ACOC_0000122301-mRNA-1;MSTRG.1152.1
MSTRG.11521	ACOC_0001180001	ACOC_0001180001-mRNA-1;MSTRG.11521.1;MSTRG.11521.2
MSTRG.11522	ACOC_0001180101	ACOC_0001180101-mRNA-1;MSTRG.11522.1
MSTRG.11523	ACOC_0001180201	ACOC_0001180201-mRNA-1;MSTRG.11523.1;MSTRG.11523.2;MSTRG.11523.4
MSTRG.11524	ACOC_0001180301	ACOC_0001180301-mRNA-1;MSTRG.11524.1
MSTRG.11525	ACOC_0001180401	ACOC_0001180401-mRNA-1;MSTRG.11525.1
MSTRG.11527	ACOC_0001180701	ACOC_0001180701-mRNA-1;MSTRG.11527.1
MSTRG.11528	ACOC_0001180801	ACOC_0001180801-mRNA-1;MSTRG.11528.2
MSTRG.11531	ACOC_0001180901	ACOC_0001180901-mRNA-1;MSTRG.11531.2
MSTRG.11533	ACOC_0001181101	ACOC_0001181101-mRNA-1;MSTRG.11533.1
MSTRG.11534	ACOC_0001181301	ACOC_0001181301-mRNA-1;MSTRG.11534.1
MSTRG.11538	ACOC_0001182001	ACOC_0001182001-mRNA-1;MSTRG.11538.1
MSTRG.11539	ACOC_0001182201	ACOC_0001182201-mRNA-1;MSTRG.11539.1
MSTRG.11541	ACOC_0001182301	ACOC_0001182301-mRNA-1;MSTRG.11541.2
MSTRG.11542	ACOC_0001182401	ACOC_0001182401-mRNA-1;MSTRG.11542.1
MSTRG.11543	ACOC_0001182501	ACOC_0001182501-mRNA-1;MSTRG.11543.1;MSTRG.11543.3
MSTRG.11544	ACOC_0001182601	ACOC_0001182601-mRNA-1;MSTRG.11544.1
MSTRG.11545	ACOC_0001182701	ACOC_0001182701-mRNA-1;MSTRG.11545.2
MSTRG.11546	ACOC_0001182801	ACOC_0001182801-mRNA-1;MSTRG.11546.1;MSTRG.11546.2
MSTRG.11547	ACOC_0001182901	ACOC_0001182901-mRNA-1;MSTRG.11547.2
MSTRG.11548	ACOC_0001183001	ACOC_0001183001-mRNA-1;MSTRG.11548.1;MSTRG.11548.2
MSTRG.11549	ACOC_0001183301	ACOC_0001183301-mRNA-1;MSTRG.11549.1
MSTRG.11551	ACOC_0001183501	ACOC_0001183501-mRNA-1;MSTRG.11551.1
MSTRG.11552	ACOC_0001183601	ACOC_0001183601-mRNA-1;MSTRG.11552.1
MSTRG.11553	ACOC_0001183701	ACOC_0001183701-mRNA-1;MSTRG.11553.1
MSTRG.11555	ACOC_0001184001	ACOC_0001184001-mRNA-1;MSTRG.11555.1
MSTRG.11561	ACOC_0001184701	ACOC_0001184701-mRNA-1;MSTRG.11561.2
MSTRG.11562	ACOC_0001184801	ACOC_0001184801-mRNA-1;MSTRG.11562.1
MSTRG.11563	ACOC_0001184901	ACOC_0001184901-mRNA-1;MSTRG.11563.1
MSTRG.11564	ACOC_0001185001	ACOC_0001185001-mRNA-1;MSTRG.11564.1
MSTRG.11566	ACOC_0001185201	ACOC_0001185201-mRNA-1;MSTRG.11566.1
MSTRG.11568	ACOC_0001185401	ACOC_0001185401-mRNA-1;MSTRG.11568.1
MSTRG.11569	ACOC_0001185501	ACOC_0001185501-mRNA-1;MSTRG.11569.1
MSTRG.11570	ACOC_0001185601	ACOC_0001185601-mRNA-1;MSTRG.11570.2
MSTRG.11571	ACOC_0001185701	ACOC_0001185701-mRNA-1;MSTRG.11571.1
MSTRG.11573	ACOC_0001185801	ACOC_0001185801-mRNA-1;MSTRG.11573.1
MSTRG.11576	ACOC_0001186301	ACOC_0001186301-mRNA-1;MSTRG.11576.1
MSTRG.11578	ACOC_0001186501	ACOC_0001186501-mRNA-1;MSTRG.11578.1
MSTRG.11579	ACOC_0001186601	ACOC_0001186601-mRNA-1;MSTRG.11579.1
MSTRG.1158	ACOC_0000123201	ACOC_0000123201-mRNA-1;MSTRG.1158.1
MSTRG.11581	ACOC_0001186701	ACOC_0001186701-mRNA-1;MSTRG.11581.1
MSTRG.11584	ACOC_0001187101	ACOC_0001187101-mRNA-1;MSTRG.11584.1
MSTRG.11585	ACOC_0001187201	ACOC_0001187201-mRNA-1;MSTRG.11585.1
MSTRG.11588	ACOC_0001187501	ACOC_0001187501-mRNA-1;MSTRG.11588.1
MSTRG.11591	ACOC_0001187901	ACOC_0001187901-mRNA-1;MSTRG.11591.1
MSTRG.11592	ACOC_0001188001	ACOC_0001188001-mRNA-1;MSTRG.11592.2
MSTRG.11595	ACOC_0001188501	ACOC_0001188501-mRNA-1;MSTRG.11595.2;MSTRG.11595.3
MSTRG.11596	ACOC_0001188701	ACOC_0001188701-mRNA-1;MSTRG.11596.1
MSTRG.11597	ACOC_0001188801	ACOC_0001188801-mRNA-1;MSTRG.11597.1
MSTRG.11598	ACOC_0001188901	ACOC_0001188901-mRNA-1;MSTRG.11598.1
MSTRG.11599	ACOC_0001189001	ACOC_0001189001-mRNA-1;MSTRG.11599.1
MSTRG.116	ACOC_0000013401	ACOC_0000013401-mRNA-1;MSTRG.116.1;MSTRG.116.2
MSTRG.11600	ACOC_0001189101	ACOC_0001189101-mRNA-1;MSTRG.11600.1
MSTRG.11601	ACOC_0001189201	ACOC_0001189201-mRNA-1;MSTRG.11601.1;MSTRG.11601.2
MSTRG.11602	ACOC_0001189301	ACOC_0001189301-mRNA-1;MSTRG.11602.1
MSTRG.11603	ACOC_0001189401	ACOC_0001189401-mRNA-1;MSTRG.11603.2
MSTRG.11604	ACOC_0001189601	ACOC_0001189601-mRNA-1;MSTRG.11604.1
MSTRG.11605	ACOC_0001189701	ACOC_0001189701-mRNA-1;MSTRG.11605.1
MSTRG.11607	ACOC_0001189801	ACOC_0001189801-mRNA-1;MSTRG.11607.1
MSTRG.11608	ACOC_0001189901	ACOC_0001189901-mRNA-1;MSTRG.11608.2
MSTRG.11609	ACOC_0001190001	ACOC_0001190001-mRNA-1;MSTRG.11609.1
MSTRG.1161	ACOC_0000123601	ACOC_0000123601-mRNA-1;MSTRG.1161.1
MSTRG.11610	ACOC_0001190101	ACOC_0001190101-mRNA-1;MSTRG.11610.1
MSTRG.11612	ACOC_0001190401	ACOC_0001190401-mRNA-1;MSTRG.11612.1
MSTRG.11613	ACOC_0001190501	ACOC_0001190501-mRNA-1;MSTRG.11613.1
MSTRG.11614	ACOC_0001190601	ACOC_0001190601-mRNA-1;MSTRG.11614.1
MSTRG.11615	ACOC_0001190701	ACOC_0001190701-mRNA-1;MSTRG.11615.2
MSTRG.11616	ACOC_0001190801	ACOC_0001190801-mRNA-1;MSTRG.11616.1
MSTRG.11618	ACOC_0001191001	ACOC_0001191001-mRNA-1;MSTRG.11618.1
MSTRG.11619	ACOC_0001191101	ACOC_0001191101-mRNA-1;MSTRG.11619.1
MSTRG.1162	ACOC_0000123701	ACOC_0000123701-mRNA-1;MSTRG.1162.1
MSTRG.11621	ACOC_0001191301	ACOC_0001191301-mRNA-1;MSTRG.11621.1
MSTRG.11622	ACOC_0001191501	ACOC_0001191501-mRNA-1;MSTRG.11622.1
MSTRG.11624	ACOC_0001191801	ACOC_0001191801-mRNA-1;MSTRG.11624.2
MSTRG.11627	ACOC_0001192401	ACOC_0001192401-mRNA-1;MSTRG.11627.2;MSTRG.11627.3
MSTRG.11628	ACOC_0001192701	ACOC_0001192701-mRNA-1;MSTRG.11628.2
MSTRG.11629	ACOC_0001192801	ACOC_0001192801-mRNA-1;MSTRG.11629.1
MSTRG.1163	ACOC_0000123801	ACOC_0000123801-mRNA-1;MSTRG.1163.2
MSTRG.11630	ACOC_0001192901	ACOC_0001192901-mRNA-1;MSTRG.11630.1
MSTRG.11632	ACOC_0001193001	ACOC_0001193001-mRNA-1;MSTRG.11632.2
MSTRG.11633	ACOC_0001193301	ACOC_0001193301-mRNA-1;MSTRG.11633.1
MSTRG.11635	ACOC_0001193401	ACOC_0001193401-mRNA-1;MSTRG.11635.1
MSTRG.11636	ACOC_0001193501	ACOC_0001193501-mRNA-1;MSTRG.11636.1
MSTRG.11638	ACOC_0001193601	ACOC_0001193601-mRNA-1;MSTRG.11638.1
MSTRG.11639	ACOC_0001193701	ACOC_0001193701-mRNA-1;MSTRG.11639.1
MSTRG.1164	ACOC_0000123901	ACOC_0000123901-mRNA-1;MSTRG.1164.1;MSTRG.1164.3
MSTRG.11641	ACOC_0001194001	ACOC_0001194001-mRNA-1;MSTRG.11641.1
MSTRG.11644	ACOC_0001194101	ACOC_0001194101-mRNA-1;MSTRG.11644.1
MSTRG.11647	ACOC_0001194401	ACOC_0001194401-mRNA-1;MSTRG.11647.1;MSTRG.11647.2
MSTRG.11649	ACOC_0001194501	ACOC_0001194501-mRNA-1;MSTRG.11649.1;MSTRG.11649.2
MSTRG.1165	ACOC_0000124001	ACOC_0000124001-mRNA-1;MSTRG.1165.1;MSTRG.1165.2
MSTRG.11650	ACOC_0001194601	ACOC_0001194601-mRNA-1;MSTRG.11650.1;MSTRG.11650.2;MSTRG.11650.4;MSTRG.11650.5
MSTRG.11653	ACOC_0001194901	ACOC_0001194901-mRNA-1;MSTRG.11653.1
MSTRG.11655	ACOC_0001195101	ACOC_0001195101-mRNA-1;MSTRG.11655.1
MSTRG.11656	ACOC_0001195201	ACOC_0001195201-mRNA-1;MSTRG.11656.1
MSTRG.11658	ACOC_0001195301	ACOC_0001195301-mRNA-1;MSTRG.11658.2
MSTRG.11660	ACOC_0001195501	ACOC_0001195501-mRNA-1;MSTRG.11660.1
MSTRG.11661	ACOC_0001195601	ACOC_0001195601-mRNA-1;MSTRG.11661.1;MSTRG.11661.2
MSTRG.11662	ACOC_0001195701	ACOC_0001195701-mRNA-1;MSTRG.11662.2
MSTRG.11663	ACOC_0001195901	ACOC_0001195901-mRNA-1;MSTRG.11663.1
MSTRG.11666	ACOC_0001196101	ACOC_0001196101-mRNA-1;MSTRG.11666.1
MSTRG.11667	ACOC_0001196201	ACOC_0001196201-mRNA-1;MSTRG.11667.1
MSTRG.11669	ACOC_0001196301	ACOC_0001196301-mRNA-1;MSTRG.11669.1
MSTRG.1167	ACOC_0000124101	ACOC_0000124101-mRNA-1;MSTRG.1167.1
MSTRG.11672	ACOC_0001196501	ACOC_0001196501-mRNA-1;MSTRG.11672.1
MSTRG.11674	ACOC_0001196601	ACOC_0001196601-mRNA-1;MSTRG.11674.1
MSTRG.11675	ACOC_0001196701	ACOC_0001196701-mRNA-1;MSTRG.11675.1
MSTRG.11677	ACOC_0001196801	ACOC_0001196801-mRNA-1;MSTRG.11677.1
MSTRG.11680	ACOC_0001197301	ACOC_0001197301-mRNA-1;MSTRG.11680.1
MSTRG.11682	ACOC_0001197401	ACOC_0001197401-mRNA-1;MSTRG.11682.1
MSTRG.11683	ACOC_0001197501	ACOC_0001197501-mRNA-1;MSTRG.11683.1
MSTRG.11684	ACOC_0001197601	ACOC_0001197601-mRNA-1;MSTRG.11684.1;MSTRG.11684.3;MSTRG.11684.4
MSTRG.11685	ACOC_0001197701	ACOC_0001197701-mRNA-1;MSTRG.11685.1
MSTRG.11686	ACOC_0001197801	ACOC_0001197801-mRNA-1;MSTRG.11686.1
MSTRG.1169	ACOC_0000124401	ACOC_0000124401-mRNA-1;MSTRG.1169.1
MSTRG.11694	ACOC_0001198901	ACOC_0001198901-mRNA-1;MSTRG.11694.1
MSTRG.11695	ACOC_0001199001	ACOC_0001199001-mRNA-1;MSTRG.11695.1
MSTRG.11698	ACOC_0001199301	ACOC_0001199301-mRNA-1;MSTRG.11698.1
MSTRG.11699	ACOC_0001199501	ACOC_0001199501-mRNA-1;MSTRG.11699.1
MSTRG.117	ACOC_0000013501	ACOC_0000013501-mRNA-1;MSTRG.117.1
MSTRG.1170	ACOC_0000124501	ACOC_0000124501-mRNA-1;MSTRG.1170.1
MSTRG.11700	ACOC_0001199601	ACOC_0001199601-mRNA-1;MSTRG.11700.1
MSTRG.11702	ACOC_0001199801	ACOC_0001199801-mRNA-1;MSTRG.11702.2
MSTRG.11705	ACOC_0001200101	ACOC_0001200101-mRNA-1;MSTRG.11705.1
MSTRG.11708	ACOC_0001200401	ACOC_0001200401-mRNA-1;MSTRG.11708.1;MSTRG.11708.2;MSTRG.11708.4
MSTRG.11709	ACOC_0001200501	ACOC_0001200501-mRNA-1;MSTRG.11709.2
MSTRG.11712	ACOC_0001200701	ACOC_0001200701-mRNA-1;MSTRG.11712.2
MSTRG.11713	ACOC_0001200801	ACOC_0001200801-mRNA-1;MSTRG.11713.1;MSTRG.11713.2
MSTRG.11716	ACOC_0001201001	ACOC_0001201001-mRNA-1;MSTRG.11716.1
MSTRG.11717	ACOC_0001201101	ACOC_0001201101-mRNA-1;MSTRG.11717.1
MSTRG.11719	ACOC_0001201301	ACOC_0001201301-mRNA-1;MSTRG.11719.1
MSTRG.1172	ACOC_0000124701	ACOC_0000124701-mRNA-1;MSTRG.1172.1
MSTRG.11721	ACOC_0001201401	ACOC_0001201401-mRNA-1;MSTRG.11721.1
MSTRG.11725	ACOC_0001202001	ACOC_0001202001-mRNA-1;MSTRG.11725.1;MSTRG.11725.3
MSTRG.11727	ACOC_0001202201	ACOC_0001202201-mRNA-1;MSTRG.11727.1
MSTRG.11728	ACOC_0001202301	ACOC_0001202301-mRNA-1;MSTRG.11728.2
MSTRG.1173	ACOC_0000124801	ACOC_0000124801-mRNA-1;MSTRG.1173.1;MSTRG.1173.2
MSTRG.11731	ACOC_0001202601	ACOC_0001202601-mRNA-1;MSTRG.11731.1
MSTRG.11733	ACOC_0001202701	ACOC_0001202701-mRNA-1;MSTRG.11733.1
MSTRG.11734	ACOC_0001202801	ACOC_0001202801-mRNA-1;MSTRG.11734.2
MSTRG.11739	ACOC_0001203401	ACOC_0001203401-mRNA-1;MSTRG.11739.1;MSTRG.11739.2
MSTRG.1174	ACOC_0000124901	ACOC_0000124901-mRNA-1;MSTRG.1174.1
MSTRG.11742	ACOC_0001203501	ACOC_0001203501-mRNA-1;MSTRG.11742.1
MSTRG.11743	ACOC_0001203601	ACOC_0001203601-mRNA-1;MSTRG.11743.1
MSTRG.11746	ACOC_0001203801	ACOC_0001203801-mRNA-1;MSTRG.11746.1
MSTRG.11747	ACOC_0001203901	ACOC_0001203901-mRNA-1;MSTRG.11747.1
MSTRG.11748	ACOC_0001204001	ACOC_0001204001-mRNA-1;MSTRG.11748.1
MSTRG.1175	ACOC_0000125001	ACOC_0000125001-mRNA-1;MSTRG.1175.2
MSTRG.11751	ACOC_0001204201	ACOC_0001204201-mRNA-1;MSTRG.11751.1
MSTRG.11752	ACOC_0001204301	ACOC_0001204301-mRNA-1;MSTRG.11752.1;MSTRG.11752.2
MSTRG.11753	ACOC_0001204401	ACOC_0001204401-mRNA-1;MSTRG.11753.2
MSTRG.11754	ACOC_0001204501	ACOC_0001204501-mRNA-1;MSTRG.11754.1
MSTRG.11755	ACOC_0001204601	ACOC_0001204601-mRNA-1;MSTRG.11755.1
MSTRG.11756	ACOC_0001204701	ACOC_0001204701-mRNA-1;MSTRG.11756.1
MSTRG.11757	ACOC_0001204801	ACOC_0001204801-mRNA-1;MSTRG.11757.2
MSTRG.1176	ACOC_0000125101	ACOC_0000125101-mRNA-1;MSTRG.1176.1
MSTRG.11760	ACOC_0001205001	ACOC_0001205001-mRNA-1;MSTRG.11760.2
MSTRG.11762	ACOC_0001205101	ACOC_0001205101-mRNA-1;MSTRG.11762.1
MSTRG.11764	ACOC_0001205301	ACOC_0001205301-mRNA-1;MSTRG.11764.1
MSTRG.11765	ACOC_0001205401	ACOC_0001205401-mRNA-1;MSTRG.11765.1;MSTRG.11765.3
MSTRG.11766	ACOC_0001205501	ACOC_0001205501-mRNA-1;MSTRG.11766.1
MSTRG.11767	ACOC_0001205601	ACOC_0001205601-mRNA-1;MSTRG.11767.1;MSTRG.11767.3
MSTRG.11768	ACOC_0001205701	ACOC_0001205701-mRNA-1;MSTRG.11768.1
MSTRG.11769	ACOC_0001205801	ACOC_0001205801-mRNA-1;MSTRG.11769.1
MSTRG.1177	ACOC_0000125201	ACOC_0000125201-mRNA-1;MSTRG.1177.1
MSTRG.11770	ACOC_0001205901	ACOC_0001205901-mRNA-1;MSTRG.11770.1
MSTRG.11771	ACOC_0001206001	ACOC_0001206001-mRNA-1;MSTRG.11771.1;MSTRG.11771.2;MSTRG.11771.4;MSTRG.11771.5
MSTRG.11772	ACOC_0001206101	ACOC_0001206101-mRNA-1;MSTRG.11772.1;MSTRG.11772.2
MSTRG.11774	ACOC_0001206401	ACOC_0001206401-mRNA-1;MSTRG.11774.2
MSTRG.11776	ACOC_0001206601	ACOC_0001206601-mRNA-1;MSTRG.11776.1;MSTRG.11776.3
MSTRG.11777	ACOC_0001206801	ACOC_0001206801-mRNA-1;MSTRG.11777.1
MSTRG.1178	ACOC_0000125301	ACOC_0000125301-mRNA-1;MSTRG.1178.1;MSTRG.1178.2
MSTRG.11780	ACOC_0001207301	ACOC_0001207301-mRNA-1;MSTRG.11780.1
MSTRG.11781	ACOC_0001207401	ACOC_0001207401-mRNA-1;MSTRG.11781.1
MSTRG.11783	ACOC_0001207601	ACOC_0001207601-mRNA-1;MSTRG.11783.1
MSTRG.11785	ACOC_0001207701	ACOC_0001207701-mRNA-1;MSTRG.11785.1;MSTRG.11785.3
MSTRG.11786	ACOC_0001207801	ACOC_0001207801-mRNA-1;MSTRG.11786.1
MSTRG.11787	ACOC_0001207901	ACOC_0001207901-mRNA-1;MSTRG.11787.1
MSTRG.11788	ACOC_0001208001	ACOC_0001208001-mRNA-1;MSTRG.11788.1
MSTRG.11789	ACOC_0001208101	ACOC_0001208101-mRNA-1;MSTRG.11789.1;MSTRG.11789.2;MSTRG.11789.3
MSTRG.1179	ACOC_0000125401	ACOC_0000125401-mRNA-1;MSTRG.1179.1
MSTRG.11790	ACOC_0001208201	ACOC_0001208201-mRNA-1;MSTRG.11790.2;MSTRG.11790.3
MSTRG.11791	ACOC_0001208301	ACOC_0001208301-mRNA-1;MSTRG.11791.1
MSTRG.11792	ACOC_0001208401	ACOC_0001208401-mRNA-1;MSTRG.11792.1
MSTRG.11793	ACOC_0001208501	ACOC_0001208501-mRNA-1;MSTRG.11793.1
MSTRG.11794	ACOC_0001208601	ACOC_0001208601-mRNA-1;MSTRG.11794.1
MSTRG.11796	ACOC_0001209101	ACOC_0001209101-mRNA-1;MSTRG.11796.1
MSTRG.11797	ACOC_0001209301	ACOC_0001209301-mRNA-1;MSTRG.11797.1;MSTRG.11797.2
MSTRG.1180	ACOC_0000125501	ACOC_0000125501-mRNA-1;MSTRG.1180.2;MSTRG.1180.3
MSTRG.11800	ACOC_0001209801	ACOC_0001209801-mRNA-1;MSTRG.11800.1
MSTRG.11803	ACOC_0001210001	ACOC_0001210001-mRNA-1;MSTRG.11803.1;MSTRG.11803.3
MSTRG.11804	ACOC_0001210101	ACOC_0001210101-mRNA-1;MSTRG.11804.1
MSTRG.11805	ACOC_0001210201	ACOC_0001210201-mRNA-1;MSTRG.11805.2
MSTRG.11806	ACOC_0001210301	ACOC_0001210301-mRNA-1;MSTRG.11806.1
MSTRG.11807	ACOC_0001210401	ACOC_0001210401-mRNA-1;MSTRG.11807.2
MSTRG.11808	ACOC_0001210501	ACOC_0001210501-mRNA-1;MSTRG.11808.1
MSTRG.11809	ACOC_0001210601	ACOC_0001210601-mRNA-1;MSTRG.11809.2;MSTRG.11809.3
MSTRG.1181	ACOC_0000125701	ACOC_0000125701-mRNA-1;MSTRG.1181.1
MSTRG.11810	ACOC_0001210701	ACOC_0001210701-mRNA-1;MSTRG.11810.2
MSTRG.11811	ACOC_0001210801	ACOC_0001210801-mRNA-1;MSTRG.11811.1
MSTRG.11812	ACOC_0001210901	ACOC_0001210901-mRNA-1;MSTRG.11812.1
MSTRG.11813	ACOC_0001211001	ACOC_0001211001-mRNA-1;MSTRG.11813.1
MSTRG.11815	ACOC_0001211301	ACOC_0001211301-mRNA-1;MSTRG.11815.1
MSTRG.11819	ACOC_0001211801	ACOC_0001211801-mRNA-1;MSTRG.11819.1
MSTRG.11822	ACOC_0001212001	ACOC_0001212001-mRNA-1;MSTRG.11822.1
MSTRG.11824	ACOC_0001212401	ACOC_0001212401-mRNA-1;MSTRG.11824.2
MSTRG.11825	ACOC_0001212601	ACOC_0001212601-mRNA-1;MSTRG.11825.1;MSTRG.11825.3;MSTRG.11825.4
MSTRG.11826	ACOC_0001212701	ACOC_0001212701-mRNA-1;MSTRG.11826.1
MSTRG.11828	ACOC_0001213001	ACOC_0001213001-mRNA-1;MSTRG.11828.1
MSTRG.11829	ACOC_0001213101	ACOC_0001213101-mRNA-1;MSTRG.11829.2
MSTRG.11831	ACOC_0001213201	ACOC_0001213201-mRNA-1;MSTRG.11831.1
MSTRG.11832	ACOC_0001213301	ACOC_0001213301-mRNA-1;MSTRG.11832.1
MSTRG.11834	ACOC_0001213401	ACOC_0001213401-mRNA-1;MSTRG.11834.1
MSTRG.11835	ACOC_0001213501	ACOC_0001213501-mRNA-1;MSTRG.11835.1
MSTRG.11837	ACOC_0001213601	ACOC_0001213601-mRNA-1;MSTRG.11837.1
MSTRG.11839	ACOC_0001213701	ACOC_0001213701-mRNA-1;MSTRG.11839.1
MSTRG.1184	ACOC_0000125801	ACOC_0000125801-mRNA-1;MSTRG.1184.1
MSTRG.11840	ACOC_0001213801	ACOC_0001213801-mRNA-1;MSTRG.11840.1
MSTRG.11844	ACOC_0001214001	ACOC_0001214001-mRNA-1;MSTRG.11844.1
MSTRG.11845	ACOC_0001214101	ACOC_0001214101-mRNA-1;MSTRG.11845.1
MSTRG.11846	ACOC_0001214301	ACOC_0001214301-mRNA-1;MSTRG.11846.1;MSTRG.11846.2
MSTRG.11848	ACOC_0001214501	ACOC_0001214501-mRNA-1;MSTRG.11848.1;MSTRG.11848.2
MSTRG.11849	ACOC_0001214701	ACOC_0001214701-mRNA-1;MSTRG.11849.2
MSTRG.1185	ACOC_0000125901	ACOC_0000125901-mRNA-1;MSTRG.1185.1
MSTRG.11850	ACOC_0001214801	ACOC_0001214801-mRNA-1;MSTRG.11850.1
MSTRG.11851	ACOC_0001214901	ACOC_0001214901-mRNA-1;MSTRG.11851.1
MSTRG.11852	ACOC_0001215001	ACOC_0001215001-mRNA-1;MSTRG.11852.1
MSTRG.11854	ACOC_0001215201	ACOC_0001215201-mRNA-1;MSTRG.11854.2
MSTRG.11859	ACOC_0001215601	ACOC_0001215601-mRNA-1;MSTRG.11859.1
MSTRG.1186	ACOC_0000126001	ACOC_0000126001-mRNA-1;MSTRG.1186.1
MSTRG.11861	ACOC_0001215801	ACOC_0001215801-mRNA-1;MSTRG.11861.2;MSTRG.11861.3
MSTRG.11862	ACOC_0001215901	ACOC_0001215901-mRNA-1;MSTRG.11862.1
MSTRG.11863	ACOC_0001216001	ACOC_0001216001-mRNA-1;MSTRG.11863.1
MSTRG.11864	ACOC_0001216101	ACOC_0001216101-mRNA-1;MSTRG.11864.1
MSTRG.11865	ACOC_0001216301	ACOC_0001216301-mRNA-1;MSTRG.11865.1
MSTRG.11869	ACOC_0001216901	ACOC_0001216901-mRNA-1;MSTRG.11869.1
MSTRG.11872	ACOC_0001217301	ACOC_0001217301-mRNA-1;MSTRG.11872.1
MSTRG.11873	ACOC_0001217401	ACOC_0001217401-mRNA-1;MSTRG.11873.1;MSTRG.11873.3
MSTRG.11874	ACOC_0001217501	ACOC_0001217501-mRNA-1;MSTRG.11874.1
MSTRG.11875	ACOC_0001217601	ACOC_0001217601-mRNA-1;MSTRG.11875.1
MSTRG.11878	ACOC_0001218001	ACOC_0001218001-mRNA-1;MSTRG.11878.1;MSTRG.11878.3
MSTRG.1188	ACOC_0000126101	ACOC_0000126101-mRNA-1;MSTRG.1188.1
MSTRG.11880	ACOC_0001218201	ACOC_0001218201-mRNA-1;MSTRG.11880.2
MSTRG.11884	ACOC_0001218701	ACOC_0001218701-mRNA-1;MSTRG.11884.1
MSTRG.11888	ACOC_0001219401	ACOC_0001219401-mRNA-1;MSTRG.11888.1;MSTRG.11888.3
MSTRG.11889	ACOC_0001219501	ACOC_0001219501-mRNA-1;MSTRG.11889.1
MSTRG.1189	ACOC_0000126201	ACOC_0000126201-mRNA-1;MSTRG.1189.1
MSTRG.11891	ACOC_0001219701	ACOC_0001219701-mRNA-1;MSTRG.11891.2
MSTRG.11892	ACOC_0001219801	ACOC_0001219801-mRNA-1;MSTRG.11892.1
MSTRG.11893	ACOC_0001219901	ACOC_0001219901-mRNA-1;MSTRG.11893.1;MSTRG.11893.2;MSTRG.11893.3
MSTRG.11894	ACOC_0001220001	ACOC_0001220001-mRNA-1;MSTRG.11894.1;MSTRG.11894.2
MSTRG.11895	ACOC_0001220101	ACOC_0001220101-mRNA-1;MSTRG.11895.1
MSTRG.11897	ACOC_0001220201	ACOC_0001220201-mRNA-1;MSTRG.11897.1;MSTRG.11897.2
MSTRG.119	ACOC_0000013601	ACOC_0000013601-mRNA-1;MSTRG.119.1;MSTRG.119.2;MSTRG.119.3
MSTRG.1190	ACOC_0000126301	ACOC_0000126301-mRNA-1;MSTRG.1190.1
MSTRG.11900	ACOC_0001220501	ACOC_0001220501-mRNA-1;MSTRG.11900.1
MSTRG.11904	ACOC_0001220601	ACOC_0001220601-mRNA-1;MSTRG.11904.1
MSTRG.11906	ACOC_0001220701	ACOC_0001220701-mRNA-1;MSTRG.11906.1
MSTRG.11907	ACOC_0001220801	ACOC_0001220801-mRNA-1;MSTRG.11907.1
MSTRG.11908	ACOC_0001220901	ACOC_0001220901-mRNA-1;MSTRG.11908.1;MSTRG.11908.2
MSTRG.1191	ACOC_0000126501	ACOC_0000126501-mRNA-1;MSTRG.1191.1
MSTRG.11910	ACOC_0001221101	ACOC_0001221101-mRNA-1;MSTRG.11910.2
MSTRG.11911	ACOC_0001221201	ACOC_0001221201-mRNA-1;MSTRG.11911.1
MSTRG.11913	ACOC_0001221301	ACOC_0001221301-mRNA-1;MSTRG.11913.1;MSTRG.11913.3
MSTRG.11915	ACOC_0001221401	ACOC_0001221401-mRNA-1;MSTRG.11915.1
MSTRG.11916	ACOC_0001221601	ACOC_0001221601-mRNA-1;MSTRG.11916.1
MSTRG.11918	ACOC_0001221701	ACOC_0001221701-mRNA-1;MSTRG.11918.1
MSTRG.11919	ACOC_0001221801	ACOC_0001221801-mRNA-1;MSTRG.11919.1
MSTRG.11920	ACOC_0001221901	ACOC_0001221901-mRNA-1;MSTRG.11920.1
MSTRG.11922	ACOC_0001222001	ACOC_0001222001-mRNA-1;MSTRG.11922.1
MSTRG.11923	ACOC_0001222101	ACOC_0001222101-mRNA-1;MSTRG.11923.2;MSTRG.11923.3
MSTRG.11925	ACOC_0001222401	ACOC_0001222401-mRNA-1;MSTRG.11925.1
MSTRG.11928	ACOC_0001222601	ACOC_0001222601-mRNA-1;MSTRG.11928.1
MSTRG.11930	ACOC_0001222901	ACOC_0001222901-mRNA-1;MSTRG.11930.1;MSTRG.11930.2;MSTRG.11930.4
MSTRG.11932	ACOC_0001223001	ACOC_0001223001-mRNA-1;MSTRG.11932.2;MSTRG.11932.3
MSTRG.11935	ACOC_0001223201	ACOC_0001223201-mRNA-1;MSTRG.11935.1;MSTRG.11935.2
MSTRG.11938	ACOC_0001223501	ACOC_0001223501-mRNA-1;MSTRG.11938.2;MSTRG.11938.3
MSTRG.11939	ACOC_0001223601	ACOC_0001223601-mRNA-1;MSTRG.11939.2
MSTRG.11940	ACOC_0001223901	ACOC_0001223901-mRNA-1;MSTRG.11940.1
MSTRG.11943	ACOC_0001224201	ACOC_0001224201-mRNA-1;MSTRG.11943.1
MSTRG.11944	ACOC_0001224301	ACOC_0001224301-mRNA-1;MSTRG.11944.1
MSTRG.11945	ACOC_0001224401	ACOC_0001224401-mRNA-1;MSTRG.11945.1;MSTRG.11945.3
MSTRG.11946	ACOC_0001224501	ACOC_0001224501-mRNA-1;MSTRG.11946.1
MSTRG.11947	ACOC_0001224701	ACOC_0001224701-mRNA-1;MSTRG.11947.1
MSTRG.11948	ACOC_0001224801	ACOC_0001224801-mRNA-1;MSTRG.11948.1
MSTRG.11949	ACOC_0001224901	ACOC_0001224901-mRNA-1;MSTRG.11949.1
MSTRG.11950	ACOC_0001225001	ACOC_0001225001-mRNA-1;MSTRG.11950.1
MSTRG.11953	ACOC_0001225401	ACOC_0001225401-mRNA-1;MSTRG.11953.1;MSTRG.11953.3
MSTRG.11954	ACOC_0001225601	ACOC_0001225601-mRNA-1;MSTRG.11954.1
MSTRG.11955	ACOC_0001225701	ACOC_0001225701-mRNA-1;MSTRG.11955.1;MSTRG.11955.3
MSTRG.11956	ACOC_0001225801	ACOC_0001225801-mRNA-1;MSTRG.11956.1
MSTRG.11958	ACOC_0001225901	ACOC_0001225901-mRNA-1;MSTRG.11958.1;MSTRG.11958.2
MSTRG.11959	ACOC_0001226001	ACOC_0001226001-mRNA-1;MSTRG.11959.1
MSTRG.1196	ACOC_0000127001	ACOC_0000127001-mRNA-1;MSTRG.1196.2;MSTRG.1196.3
MSTRG.11961	ACOC_0001226301	ACOC_0001226301-mRNA-1;MSTRG.11961.1
MSTRG.11962	ACOC_0001226401	ACOC_0001226401-mRNA-1;MSTRG.11962.2
MSTRG.11965	ACOC_0001226701	ACOC_0001226701-mRNA-1;MSTRG.11965.2
MSTRG.11966	ACOC_0001226801	ACOC_0001226801-mRNA-1;MSTRG.11966.1
MSTRG.11968	ACOC_0001226901	ACOC_0001226901-mRNA-1;MSTRG.11968.2;MSTRG.11968.3
MSTRG.1197	ACOC_0000127101	ACOC_0000127101-mRNA-1;MSTRG.1197.1
MSTRG.11970	ACOC_0001227201	ACOC_0001227201-mRNA-1;MSTRG.11970.1
MSTRG.11971	ACOC_0001227301	ACOC_0001227301-mRNA-1;MSTRG.11971.1
MSTRG.11972	ACOC_0001227401	ACOC_0001227401-mRNA-1;MSTRG.11972.1
MSTRG.11973	ACOC_0001227501	ACOC_0001227501-mRNA-1;MSTRG.11973.1
MSTRG.11974	ACOC_0001227601	ACOC_0001227601-mRNA-1;MSTRG.11974.1
MSTRG.11975	ACOC_0001227701	ACOC_0001227701-mRNA-1;MSTRG.11975.1
MSTRG.11979	ACOC_0001228001	ACOC_0001228001-mRNA-1;MSTRG.11979.1
MSTRG.11981	ACOC_0001228101	ACOC_0001228101-mRNA-1;MSTRG.11981.1
MSTRG.11982	ACOC_0001228201	ACOC_0001228201-mRNA-1;MSTRG.11982.1
MSTRG.11983	ACOC_0001228301	ACOC_0001228301-mRNA-1;MSTRG.11983.2
MSTRG.11984	ACOC_0001228401	ACOC_0001228401-mRNA-1;MSTRG.11984.1
MSTRG.11986	ACOC_0001228501	ACOC_0001228501-mRNA-1;MSTRG.11986.1
MSTRG.11988	ACOC_0001228801	ACOC_0001228801-mRNA-1;MSTRG.11988.1
MSTRG.1199	ACOC_0000127301	ACOC_0000127301-mRNA-1;MSTRG.1199.1
MSTRG.11990	ACOC_0001229101	ACOC_0001229101-mRNA-1;MSTRG.11990.1
MSTRG.11992	ACOC_0001229201	ACOC_0001229201-mRNA-1;MSTRG.11992.2
MSTRG.11993	ACOC_0001229301	ACOC_0001229301-mRNA-1;MSTRG.11993.2;MSTRG.11993.3
MSTRG.120	ACOC_0000013701	ACOC_0000013701-mRNA-1;MSTRG.120.1
MSTRG.1200	ACOC_0000127401	ACOC_0000127401-mRNA-1;MSTRG.1200.1;MSTRG.1200.3;MSTRG.1200.4
MSTRG.12000	ACOC_0001229501	ACOC_0001229501-mRNA-1;MSTRG.12000.1
MSTRG.12001	ACOC_0001229601	ACOC_0001229601-mRNA-1;MSTRG.12001.1;MSTRG.12001.3
MSTRG.12004	ACOC_0001229901	ACOC_0001229901-mRNA-1;MSTRG.12004.1;MSTRG.12004.3
MSTRG.12005	ACOC_0001230001	ACOC_0001230001-mRNA-1;MSTRG.12005.1;MSTRG.12005.3
MSTRG.12006	ACOC_0001230401	ACOC_0001230401-mRNA-1;MSTRG.12006.2
MSTRG.12009	ACOC_0001230501	ACOC_0001230501-mRNA-1;MSTRG.12009.1
MSTRG.12010	ACOC_0001230801	ACOC_0001230801-mRNA-1;MSTRG.12010.1
MSTRG.12012	ACOC_0001231001	ACOC_0001231001-mRNA-1;MSTRG.12012.1;MSTRG.12012.3
MSTRG.12014	ACOC_0001231401	ACOC_0001231401-mRNA-1;MSTRG.12014.1
MSTRG.12015	ACOC_0001231501	ACOC_0001231501-mRNA-1;MSTRG.12015.1
MSTRG.12016	ACOC_0001231601	ACOC_0001231601-mRNA-1;MSTRG.12016.1
MSTRG.12017	ACOC_0001231701	ACOC_0001231701-mRNA-1;MSTRG.12017.1;MSTRG.12017.3
MSTRG.12020	ACOC_0001232001	ACOC_0001232001-mRNA-1;MSTRG.12020.1;MSTRG.12020.2
MSTRG.12021	ACOC_0001232101	ACOC_0001232101-mRNA-1;MSTRG.12021.1
MSTRG.12022	ACOC_0001232201	ACOC_0001232201-mRNA-1;MSTRG.12022.1
MSTRG.12023	ACOC_0001232301	ACOC_0001232301-mRNA-1;MSTRG.12023.1
MSTRG.12024	ACOC_0001232401	ACOC_0001232401-mRNA-1;MSTRG.12024.1
MSTRG.12026	ACOC_0001232601	ACOC_0001232601-mRNA-1;MSTRG.12026.1;MSTRG.12026.2;MSTRG.12026.3
MSTRG.12027	ACOC_0001232701	ACOC_0001232701-mRNA-1;MSTRG.12027.1
MSTRG.12032	ACOC_0001232901	ACOC_0001232901-mRNA-1;MSTRG.12032.1
MSTRG.12034	ACOC_0001233101	ACOC_0001233101-mRNA-1;MSTRG.12034.1
MSTRG.12036	ACOC_0001233201	ACOC_0001233201-mRNA-1;MSTRG.12036.1
MSTRG.12038	ACOC_0001233501	ACOC_0001233501-mRNA-1;MSTRG.12038.2
MSTRG.12039	ACOC_0001233601	ACOC_0001233601-mRNA-1;MSTRG.12039.1;MSTRG.12039.2
MSTRG.12043	ACOC_0001234001	ACOC_0001234001-mRNA-1;MSTRG.12043.2
MSTRG.12044	ACOC_0001234101	ACOC_0001234101-mRNA-1;MSTRG.12044.1;MSTRG.12044.2
MSTRG.12047	ACOC_0001234501	ACOC_0001234501-mRNA-1;MSTRG.12047.2
MSTRG.12049	ACOC_0001234701	ACOC_0001234701-mRNA-1;MSTRG.12049.2;MSTRG.12049.3
MSTRG.1205	ACOC_0000128001	ACOC_0000128001-mRNA-1;MSTRG.1205.1
MSTRG.12050	ACOC_0001235001	ACOC_0001235001-mRNA-1;MSTRG.12050.1
MSTRG.12052	ACOC_0001235101	ACOC_0001235101-mRNA-1;MSTRG.12052.1
MSTRG.12053	ACOC_0001235301	ACOC_0001235301-mRNA-1;MSTRG.12053.1;MSTRG.12053.3;MSTRG.12053.4
MSTRG.12054	ACOC_0001235401	ACOC_0001235401-mRNA-1;MSTRG.12054.1
MSTRG.12057	ACOC_0001235501	ACOC_0001235501-mRNA-1;MSTRG.12057.1;MSTRG.12057.2
MSTRG.12058	ACOC_0001235601	ACOC_0001235601-mRNA-1;MSTRG.12058.1
MSTRG.12059	ACOC_0001235701	ACOC_0001235701-mRNA-1;MSTRG.12059.1
MSTRG.12060	ACOC_0001235801	ACOC_0001235801-mRNA-1;MSTRG.12060.1
MSTRG.12061	ACOC_0001235901	ACOC_0001235901-mRNA-1;MSTRG.12061.1
MSTRG.12062	ACOC_0001236001	ACOC_0001236001-mRNA-1;MSTRG.12062.1
MSTRG.12063	ACOC_0001236101	ACOC_0001236101-mRNA-1;MSTRG.12063.2
MSTRG.12064	ACOC_0001236201	ACOC_0001236201-mRNA-1;MSTRG.12064.1
MSTRG.12066	ACOC_0001236301	ACOC_0001236301-mRNA-1;MSTRG.12066.1
MSTRG.12067	ACOC_0001236601	ACOC_0001236601-mRNA-1;MSTRG.12067.2
MSTRG.12068	ACOC_0001236701	ACOC_0001236701-mRNA-1;MSTRG.12068.1
MSTRG.12069	ACOC_0001236801	ACOC_0001236801-mRNA-1;MSTRG.12069.1;MSTRG.12069.2
MSTRG.1207	ACOC_0000128201	ACOC_0000128201-mRNA-1;MSTRG.1207.1
MSTRG.12071	ACOC_0001236901	ACOC_0001236901-mRNA-1;MSTRG.12071.2
MSTRG.12072	ACOC_0001237001	ACOC_0001237001-mRNA-1;MSTRG.12072.1
MSTRG.12074	ACOC_0001237201	ACOC_0001237201-mRNA-1;MSTRG.12074.1
MSTRG.12075	ACOC_0001237301	ACOC_0001237301-mRNA-1;MSTRG.12075.2
MSTRG.12076	ACOC_0001237401	ACOC_0001237401-mRNA-1;MSTRG.12076.2
MSTRG.12077	ACOC_0001237501	ACOC_0001237501-mRNA-1;MSTRG.12077.1;MSTRG.12077.2
MSTRG.12079	ACOC_0001237601	ACOC_0001237601-mRNA-1;MSTRG.12079.1
MSTRG.12080	ACOC_0001237701	ACOC_0001237701-mRNA-1;MSTRG.12080.1;MSTRG.12080.2
MSTRG.12082	ACOC_0001237801	ACOC_0001237801-mRNA-1;MSTRG.12082.2
MSTRG.12085	ACOC_0001238201	ACOC_0001238201-mRNA-1;MSTRG.12085.1;MSTRG.12085.3;MSTRG.12085.4
MSTRG.12087	ACOC_0001238301	ACOC_0001238301-mRNA-1;MSTRG.12087.1;MSTRG.12087.2
MSTRG.12088	ACOC_0001238401	ACOC_0001238401-mRNA-1;MSTRG.12088.1
MSTRG.12092	ACOC_0001238601	ACOC_0001238601-mRNA-1;MSTRG.12092.1;MSTRG.12092.3;MSTRG.12092.4
MSTRG.12095	ACOC_0001238801	ACOC_0001238801-mRNA-1;MSTRG.12095.1;MSTRG.12095.2;MSTRG.12095.3
MSTRG.12096	ACOC_0001238901	ACOC_0001238901-mRNA-1;MSTRG.12096.1;MSTRG.12096.2
MSTRG.12097	ACOC_0001239101	ACOC_0001239101-mRNA-1;MSTRG.12097.1
MSTRG.12099	ACOC_0001239401	ACOC_0001239401-mRNA-1;MSTRG.12099.1
MSTRG.12100	ACOC_0001239501	ACOC_0001239501-mRNA-1;MSTRG.12100.1
MSTRG.12101	ACOC_0001239601	ACOC_0001239601-mRNA-1;MSTRG.12101.1;MSTRG.12101.2
MSTRG.12102	ACOC_0001239701	ACOC_0001239701-mRNA-1;MSTRG.12102.1
MSTRG.12104	ACOC_0001240001	ACOC_0001240001-mRNA-1;MSTRG.12104.1
MSTRG.12105	ACOC_0001240101	ACOC_0001240101-mRNA-1;MSTRG.12105.1;MSTRG.12105.2
MSTRG.12107	ACOC_0001240201	ACOC_0001240201-mRNA-1;MSTRG.12107.1
MSTRG.12111	ACOC_0001240501	ACOC_0001240501-mRNA-1;MSTRG.12111.1
MSTRG.12113	ACOC_0001240601	ACOC_0001240601-mRNA-1;MSTRG.12113.1
MSTRG.12114	ACOC_0001240701	ACOC_0001240701-mRNA-1;MSTRG.12114.1
MSTRG.12115	ACOC_0001240901	ACOC_0001240901-mRNA-1;MSTRG.12115.2
MSTRG.12116	ACOC_0001241001	ACOC_0001241001-mRNA-1;MSTRG.12116.1
MSTRG.12117	ACOC_0001241101	ACOC_0001241101-mRNA-1;MSTRG.12117.1
MSTRG.12118	ACOC_0001241201	ACOC_0001241201-mRNA-1;MSTRG.12118.1
MSTRG.12119	ACOC_0001241301	ACOC_0001241301-mRNA-1;MSTRG.12119.1
MSTRG.1212	ACOC_0000128701	ACOC_0000128701-mRNA-1;MSTRG.1212.2
MSTRG.12120	ACOC_0001241401	ACOC_0001241401-mRNA-1;MSTRG.12120.1
MSTRG.12125	ACOC_0001242201	ACOC_0001242201-mRNA-1;MSTRG.12125.1
MSTRG.12126	ACOC_0001242301	ACOC_0001242301-mRNA-1;MSTRG.12126.1
MSTRG.12127	ACOC_0001242401	ACOC_0001242401-mRNA-1;MSTRG.12127.1
MSTRG.12129	ACOC_0001242501	ACOC_0001242501-mRNA-1;MSTRG.12129.1
MSTRG.12130	ACOC_0001242601	ACOC_0001242601-mRNA-1;MSTRG.12130.1;MSTRG.12130.3
MSTRG.12131	ACOC_0001242701	ACOC_0001242701-mRNA-1;MSTRG.12131.1
MSTRG.12132	ACOC_0001242801	ACOC_0001242801-mRNA-1;MSTRG.12132.1
MSTRG.12133	ACOC_0001242901	ACOC_0001242901-mRNA-1;MSTRG.12133.1
MSTRG.12134	ACOC_0001243001	ACOC_0001243001-mRNA-1;MSTRG.12134.1
MSTRG.12135	ACOC_0001243101	ACOC_0001243101-mRNA-1;MSTRG.12135.1
MSTRG.12137	ACOC_0001243301	ACOC_0001243301-mRNA-1;MSTRG.12137.1
MSTRG.12138	ACOC_0001243401	ACOC_0001243401-mRNA-1;MSTRG.12138.1
MSTRG.1214	ACOC_0000128901	ACOC_0000128901-mRNA-1;MSTRG.1214.2
MSTRG.12140	ACOC_0001243501	ACOC_0001243501-mRNA-1;MSTRG.12140.1;MSTRG.12140.3
MSTRG.12141	ACOC_0001243601	ACOC_0001243601-mRNA-1;MSTRG.12141.1
MSTRG.12142	ACOC_0001243701	ACOC_0001243701-mRNA-1;MSTRG.12142.1
MSTRG.12143	ACOC_0001243801	ACOC_0001243801-mRNA-1;MSTRG.12143.1
MSTRG.12144	ACOC_0001244001	ACOC_0001244001-mRNA-1;MSTRG.12144.2;MSTRG.12144.3
MSTRG.12147	ACOC_0001244201	ACOC_0001244201-mRNA-1;MSTRG.12147.1
MSTRG.12148	ACOC_0001244301	ACOC_0001244301-mRNA-1;MSTRG.12148.1
MSTRG.12149	ACOC_0001244401	ACOC_0001244401-mRNA-1;MSTRG.12149.1
MSTRG.12152	ACOC_0001244501	ACOC_0001244501-mRNA-1;MSTRG.12152.1
MSTRG.12154	ACOC_0001244701	ACOC_0001244701-mRNA-1;MSTRG.12154.1;MSTRG.12154.2
MSTRG.12155	ACOC_0001244801	ACOC_0001244801-mRNA-1;MSTRG.12155.1
MSTRG.12157	ACOC_0001244901	ACOC_0001244901-mRNA-1;MSTRG.12157.2
MSTRG.12158	ACOC_0001245001	ACOC_0001245001-mRNA-1;MSTRG.12158.1
MSTRG.12159	ACOC_0001245101	ACOC_0001245101-mRNA-1;MSTRG.12159.1
MSTRG.1216	ACOC_0000129201	ACOC_0000129201-mRNA-1;MSTRG.1216.1;MSTRG.1216.2
MSTRG.12160	ACOC_0001245301	ACOC_0001245301-mRNA-1;MSTRG.12160.2
MSTRG.12162	ACOC_0001245601	ACOC_0001245601-mRNA-1;MSTRG.12162.1
MSTRG.12163	ACOC_0001245701	ACOC_0001245701-mRNA-1;MSTRG.12163.2;MSTRG.12163.3
MSTRG.12164	ACOC_0001245901	ACOC_0001245901-mRNA-1;MSTRG.12164.1
MSTRG.12166	ACOC_0001246001	ACOC_0001246001-mRNA-1;MSTRG.12166.1;MSTRG.12166.3
MSTRG.12167	ACOC_0001246101	ACOC_0001246101-mRNA-1;MSTRG.12167.1
MSTRG.1217	ACOC_0000129301	ACOC_0000129301-mRNA-1;MSTRG.1217.1;MSTRG.1217.2
MSTRG.12170	ACOC_0001246201	ACOC_0001246201-mRNA-1;MSTRG.12170.1
MSTRG.12171	ACOC_0001246301	ACOC_0001246301-mRNA-1;MSTRG.12171.1;MSTRG.12171.3
MSTRG.12172	ACOC_0001246401	ACOC_0001246401-mRNA-1;MSTRG.12172.1
MSTRG.12173	ACOC_0001246501	ACOC_0001246501-mRNA-1;MSTRG.12173.1
MSTRG.12174	ACOC_0001246601	ACOC_0001246601-mRNA-1;MSTRG.12174.1
MSTRG.12175	ACOC_0001246701	ACOC_0001246701-mRNA-1;MSTRG.12175.1
MSTRG.12176	ACOC_0001246801	ACOC_0001246801-mRNA-1;MSTRG.12176.1
MSTRG.12177	ACOC_0001246901	ACOC_0001246901-mRNA-1;MSTRG.12177.1
MSTRG.12178	ACOC_0001247001	ACOC_0001247001-mRNA-1;MSTRG.12178.1
MSTRG.1218	ACOC_0000129401	ACOC_0000129401-mRNA-1;MSTRG.1218.1
MSTRG.12180	ACOC_0001247501	ACOC_0001247501-mRNA-1;MSTRG.12180.1
MSTRG.12181	ACOC_0001247601	ACOC_0001247601-mRNA-1;MSTRG.12181.1
MSTRG.12182	ACOC_0001247701	ACOC_0001247701-mRNA-1;MSTRG.12182.1
MSTRG.12183	ACOC_0001247801	ACOC_0001247801-mRNA-1;MSTRG.12183.2;MSTRG.12183.3;MSTRG.12183.4
MSTRG.12187	ACOC_0001248201	ACOC_0001248201-mRNA-1;MSTRG.12187.1
MSTRG.12189	ACOC_0001248401	ACOC_0001248401-mRNA-1;MSTRG.12189.1
MSTRG.1219	ACOC_0000129501	ACOC_0000129501-mRNA-1;MSTRG.1219.1
MSTRG.12191	ACOC_0001248601	ACOC_0001248601-mRNA-1;MSTRG.12191.1;MSTRG.12191.2
MSTRG.12192	ACOC_0001248701	ACOC_0001248701-mRNA-1;MSTRG.12192.1
MSTRG.12194	ACOC_0001248801	ACOC_0001248801-mRNA-1;MSTRG.12194.1
MSTRG.12195	ACOC_0001248901	ACOC_0001248901-mRNA-1;MSTRG.12195.1
MSTRG.12196	ACOC_0001249001	ACOC_0001249001-mRNA-1;MSTRG.12196.2;MSTRG.12196.3
MSTRG.12197	ACOC_0001249101	ACOC_0001249101-mRNA-1;MSTRG.12197.2
MSTRG.12198	ACOC_0001249201	ACOC_0001249201-mRNA-1;MSTRG.12198.1
MSTRG.122	ACOC_0000014001	ACOC_0000014001-mRNA-1;MSTRG.122.1
MSTRG.1220	ACOC_0000129601	ACOC_0000129601-mRNA-1;MSTRG.1220.1
MSTRG.12200	ACOC_0001249301	ACOC_0001249301-mRNA-1;MSTRG.12200.2
MSTRG.12201	ACOC_0001249401	ACOC_0001249401-mRNA-1;MSTRG.12201.1
MSTRG.12202	ACOC_0001249501	ACOC_0001249501-mRNA-1;MSTRG.12202.1
MSTRG.12203	ACOC_0001249601	ACOC_0001249601-mRNA-1;MSTRG.12203.1
MSTRG.12204	ACOC_0001249701	ACOC_0001249701-mRNA-1;MSTRG.12204.1
MSTRG.12206	ACOC_0001249801	ACOC_0001249801-mRNA-1;MSTRG.12206.1
MSTRG.12207	ACOC_0001250001	ACOC_0001250001-mRNA-1;MSTRG.12207.2
MSTRG.12209	ACOC_0001250201	ACOC_0001250201-mRNA-1;MSTRG.12209.1;MSTRG.12209.2;MSTRG.12209.3;MSTRG.12209.4
MSTRG.12210	ACOC_0001250301	ACOC_0001250301-mRNA-1;MSTRG.12210.1
MSTRG.12212	ACOC_0001250401	ACOC_0001250401-mRNA-1;MSTRG.12212.1
MSTRG.12217	ACOC_0001250801	ACOC_0001250801-mRNA-1;MSTRG.12217.1
MSTRG.12220	ACOC_0001251201	ACOC_0001251201-mRNA-1;MSTRG.12220.1;MSTRG.12220.2
MSTRG.12221	ACOC_0001251301	ACOC_0001251301-mRNA-1;MSTRG.12221.1;MSTRG.12221.3
MSTRG.12223	ACOC_0001251401	ACOC_0001251401-mRNA-1;MSTRG.12223.1
MSTRG.12224	ACOC_0001251501	ACOC_0001251501-mRNA-1;MSTRG.12224.2
MSTRG.12226	ACOC_0001251701	ACOC_0001251701-mRNA-1;MSTRG.12226.1;MSTRG.12226.2
MSTRG.12229	ACOC_0001252201	ACOC_0001252201-mRNA-1;MSTRG.12229.1
MSTRG.1223	ACOC_0000129801	ACOC_0000129801-mRNA-1;MSTRG.1223.1
MSTRG.12230	ACOC_0001252301	ACOC_0001252301-mRNA-1;MSTRG.12230.1
MSTRG.12231	ACOC_0001252401	ACOC_0001252401-mRNA-1;MSTRG.12231.1
MSTRG.12232	ACOC_0001252601	ACOC_0001252601-mRNA-1;MSTRG.12232.1
MSTRG.12233	ACOC_0001252701	ACOC_0001252701-mRNA-1;MSTRG.12233.1
MSTRG.12234	ACOC_0001253001	ACOC_0001253001-mRNA-1;MSTRG.12234.1
MSTRG.12236	ACOC_0001253101	ACOC_0001253101-mRNA-1;MSTRG.12236.1
MSTRG.12239	ACOC_0001253501	ACOC_0001253501-mRNA-1;MSTRG.12239.1
MSTRG.12241	ACOC_0001253601	ACOC_0001253601-mRNA-1;MSTRG.12241.1
MSTRG.12242	ACOC_0001253701	ACOC_0001253701-mRNA-1;MSTRG.12242.1
MSTRG.12244	ACOC_0001253901	ACOC_0001253901-mRNA-1;MSTRG.12244.1
MSTRG.12246	ACOC_0001254001	ACOC_0001254001-mRNA-1;MSTRG.12246.1
MSTRG.12248	ACOC_0001254201	ACOC_0001254201-mRNA-1;MSTRG.12248.2
MSTRG.12250	ACOC_0001254301	ACOC_0001254301-mRNA-1;MSTRG.12250.1
MSTRG.12252	ACOC_0001254401	ACOC_0001254401-mRNA-1;MSTRG.12252.2
MSTRG.12253	ACOC_0001254501	ACOC_0001254501-mRNA-1;MSTRG.12253.1
MSTRG.12254	ACOC_0001254601	ACOC_0001254601-mRNA-1;MSTRG.12254.1
MSTRG.12255	ACOC_0001254701	ACOC_0001254701-mRNA-1;MSTRG.12255.1;MSTRG.12255.2;MSTRG.12255.3
MSTRG.12256	ACOC_0001254801	ACOC_0001254801-mRNA-1;MSTRG.12256.1
MSTRG.12258	ACOC_0001255101	ACOC_0001255101-mRNA-1;MSTRG.12258.1;MSTRG.12258.2
MSTRG.12259	ACOC_0001255201	ACOC_0001255201-mRNA-1;MSTRG.12259.1
MSTRG.1226	ACOC_0000129901	ACOC_0000129901-mRNA-1;MSTRG.1226.2
MSTRG.12260	ACOC_0001255301	ACOC_0001255301-mRNA-1;MSTRG.12260.1
MSTRG.12262	ACOC_0001255401	ACOC_0001255401-mRNA-1;MSTRG.12262.1
MSTRG.12269	ACOC_0001256201	ACOC_0001256201-mRNA-1;MSTRG.12269.1
MSTRG.1227	ACOC_0000130001	ACOC_0000130001-mRNA-1;MSTRG.1227.1
MSTRG.12270	ACOC_0001256301	ACOC_0001256301-mRNA-1;MSTRG.12270.2
MSTRG.12271	ACOC_0001256401	ACOC_0001256401-mRNA-1;MSTRG.12271.2
MSTRG.12272	ACOC_0001256501	ACOC_0001256501-mRNA-1;MSTRG.12272.1;MSTRG.12272.2
MSTRG.12274	ACOC_0001256601	ACOC_0001256601-mRNA-1;MSTRG.12274.1
MSTRG.12276	ACOC_0001256701	ACOC_0001256701-mRNA-1;MSTRG.12276.1
MSTRG.12277	ACOC_0001256801	ACOC_0001256801-mRNA-1;MSTRG.12277.1
MSTRG.12278	ACOC_0001256901	ACOC_0001256901-mRNA-1;MSTRG.12278.2
MSTRG.12279	ACOC_0001257001	ACOC_0001257001-mRNA-1;MSTRG.12279.1
MSTRG.1228	ACOC_0000130101	ACOC_0000130101-mRNA-1;MSTRG.1228.1
MSTRG.12280	ACOC_0001257101	ACOC_0001257101-mRNA-1;MSTRG.12280.1
MSTRG.12281	ACOC_0001257201	ACOC_0001257201-mRNA-1;MSTRG.12281.2
MSTRG.12282	ACOC_0001257301	ACOC_0001257301-mRNA-1;MSTRG.12282.1;MSTRG.12282.2
MSTRG.12283	ACOC_0001257401	ACOC_0001257401-mRNA-1;MSTRG.12283.1;MSTRG.12283.3
MSTRG.12284	ACOC_0001257501	ACOC_0001257501-mRNA-1;MSTRG.12284.1
MSTRG.12285	ACOC_0001257601	ACOC_0001257601-mRNA-1;MSTRG.12285.1;MSTRG.12285.2
MSTRG.12287	ACOC_0001257801	ACOC_0001257801-mRNA-1;MSTRG.12287.1
MSTRG.12289	ACOC_0001257901	ACOC_0001257901-mRNA-1;MSTRG.12289.2
MSTRG.12290	ACOC_0001258001	ACOC_0001258001-mRNA-1;MSTRG.12290.1
MSTRG.12291	ACOC_0001258101	ACOC_0001258101-mRNA-1;MSTRG.12291.1
MSTRG.12297	ACOC_0001258301	ACOC_0001258301-mRNA-1;MSTRG.12297.1
MSTRG.12298	ACOC_0001258401	ACOC_0001258401-mRNA-1;MSTRG.12298.1
MSTRG.123	ACOC_0000014101	ACOC_0000014101-mRNA-1;MSTRG.123.1
MSTRG.1230	ACOC_0000130401	ACOC_0000130401-mRNA-1;MSTRG.1230.1
MSTRG.12300	ACOC_0001258601	ACOC_0001258601-mRNA-1;MSTRG.12300.1;MSTRG.12300.3
MSTRG.12301	ACOC_0001258801	ACOC_0001258801-mRNA-1;MSTRG.12301.1
MSTRG.12302	ACOC_0001258901	ACOC_0001258901-mRNA-1;MSTRG.12302.1
MSTRG.12303	ACOC_0001259201	ACOC_0001259201-mRNA-1;MSTRG.12303.1
MSTRG.12304	ACOC_0001259301	ACOC_0001259301-mRNA-1;MSTRG.12304.1
MSTRG.12306	ACOC_0001259501	ACOC_0001259501-mRNA-1;MSTRG.12306.1
MSTRG.12307	ACOC_0001259601	ACOC_0001259601-mRNA-1;MSTRG.12307.2
MSTRG.1231	ACOC_0000130601	ACOC_0000130601-mRNA-1;MSTRG.1231.1
MSTRG.12310	ACOC_0001259801	ACOC_0001259801-mRNA-1;MSTRG.12310.1
MSTRG.12311	ACOC_0001259901	ACOC_0001259901-mRNA-1;MSTRG.12311.1;MSTRG.12311.2
MSTRG.12313	ACOC_0001260101	ACOC_0001260101-mRNA-1;MSTRG.12313.1
MSTRG.12314	ACOC_0001260201	ACOC_0001260201-mRNA-1;MSTRG.12314.1
MSTRG.12318	ACOC_0001261001	ACOC_0001261001-mRNA-1;MSTRG.12318.1;MSTRG.12318.2
MSTRG.12319	ACOC_0001261101	ACOC_0001261101-mRNA-1;MSTRG.12319.1
MSTRG.12321	ACOC_0001261301	ACOC_0001261301-mRNA-1;MSTRG.12321.1
MSTRG.12322	ACOC_0001261401	ACOC_0001261401-mRNA-1;MSTRG.12322.1
MSTRG.12324	ACOC_0001261501	ACOC_0001261501-mRNA-1;MSTRG.12324.1
MSTRG.12325	ACOC_0001261601	ACOC_0001261601-mRNA-1;MSTRG.12325.1
MSTRG.12327	ACOC_0001261701	ACOC_0001261701-mRNA-1;MSTRG.12327.1
MSTRG.1233	ACOC_0000130701	ACOC_0000130701-mRNA-1;MSTRG.1233.1;MSTRG.1233.3
MSTRG.12330	ACOC_0001262001	ACOC_0001262001-mRNA-1;MSTRG.12330.1
MSTRG.12331	ACOC_0001262101	ACOC_0001262101-mRNA-1;MSTRG.12331.1
MSTRG.12332	ACOC_0001262201	ACOC_0001262201-mRNA-1;MSTRG.12332.1
MSTRG.12333	ACOC_0001262301	ACOC_0001262301-mRNA-1;MSTRG.12333.2
MSTRG.12334	ACOC_0001262401	ACOC_0001262401-mRNA-1;MSTRG.12334.2;MSTRG.12334.3;MSTRG.12334.4
MSTRG.12335	ACOC_0001262501	ACOC_0001262501-mRNA-1;MSTRG.12335.1
MSTRG.12336	ACOC_0001262601	ACOC_0001262601-mRNA-1;MSTRG.12336.1
MSTRG.12339	ACOC_0001262901	ACOC_0001262901-mRNA-1;MSTRG.12339.1
MSTRG.1234	ACOC_0000130801	ACOC_0000130801-mRNA-1;MSTRG.1234.1
MSTRG.12340	ACOC_0001263001	ACOC_0001263001-mRNA-1;MSTRG.12340.1
MSTRG.12342	ACOC_0001263101	ACOC_0001263101-mRNA-1;MSTRG.12342.1
MSTRG.12343	ACOC_0001263201	ACOC_0001263201-mRNA-1;MSTRG.12343.2
MSTRG.12345	ACOC_0001263401	ACOC_0001263401-mRNA-1;MSTRG.12345.2
MSTRG.12347	ACOC_0001263501	ACOC_0001263501-mRNA-1;MSTRG.12347.1
MSTRG.12348	ACOC_0001263601	ACOC_0001263601-mRNA-1;MSTRG.12348.1
MSTRG.12349	ACOC_0001263701	ACOC_0001263701-mRNA-1;MSTRG.12349.1
MSTRG.1235	ACOC_0000130901	ACOC_0000130901-mRNA-1;MSTRG.1235.2
MSTRG.12350	ACOC_0001263801	ACOC_0001263801-mRNA-1;MSTRG.12350.1
MSTRG.12357	ACOC_0001264301	ACOC_0001264301-mRNA-1;MSTRG.12357.1;MSTRG.12357.2
MSTRG.12358	ACOC_0001264401	ACOC_0001264401-mRNA-1;MSTRG.12358.1;MSTRG.12358.2
MSTRG.12359	ACOC_0001264601	ACOC_0001264601-mRNA-1;MSTRG.12359.1
MSTRG.1236	ACOC_0000131001	ACOC_0000131001-mRNA-1;MSTRG.1236.1
MSTRG.12361	ACOC_0001264801	ACOC_0001264801-mRNA-1;MSTRG.12361.1
MSTRG.12365	ACOC_0001265001	ACOC_0001265001-mRNA-1;MSTRG.12365.1
MSTRG.12366	ACOC_0001265101	ACOC_0001265101-mRNA-1;MSTRG.12366.1
MSTRG.12367	ACOC_0001265201	ACOC_0001265201-mRNA-1;MSTRG.12367.1
MSTRG.12368	ACOC_0001265601	ACOC_0001265601-mRNA-1;MSTRG.12368.2
MSTRG.12369	ACOC_0001265801	ACOC_0001265801-mRNA-1;MSTRG.12369.1
MSTRG.12370	ACOC_0001265901	ACOC_0001265901-mRNA-1;MSTRG.12370.1;MSTRG.12370.2
MSTRG.12371	ACOC_0001266001	ACOC_0001266001-mRNA-1;MSTRG.12371.1
MSTRG.12372	ACOC_0001266101	ACOC_0001266101-mRNA-1;MSTRG.12372.1
MSTRG.12374	ACOC_0001266301	ACOC_0001266301-mRNA-1;MSTRG.12374.1
MSTRG.12376	ACOC_0001266701	ACOC_0001266701-mRNA-1;MSTRG.12376.1
MSTRG.12377	ACOC_0001266801	ACOC_0001266801-mRNA-1;MSTRG.12377.1
MSTRG.12379	ACOC_0001267101	ACOC_0001267101-mRNA-1;MSTRG.12379.1
MSTRG.12380	ACOC_0001267201	ACOC_0001267201-mRNA-1;MSTRG.12380.2
MSTRG.12384	ACOC_0001267501	ACOC_0001267501-mRNA-1;MSTRG.12384.1
MSTRG.12385	ACOC_0001267601	ACOC_0001267601-mRNA-1;MSTRG.12385.1
MSTRG.12386	ACOC_0001267701	ACOC_0001267701-mRNA-1;MSTRG.12386.2
MSTRG.12389	ACOC_0001267801	ACOC_0001267801-mRNA-1;MSTRG.12389.1;MSTRG.12389.3
MSTRG.1239	ACOC_0000131401	ACOC_0000131401-mRNA-1;MSTRG.1239.1
MSTRG.12390	ACOC_0001267901	ACOC_0001267901-mRNA-1;MSTRG.12390.1
MSTRG.12391	ACOC_0001268201	ACOC_0001268201-mRNA-1;MSTRG.12391.1
MSTRG.12392	ACOC_0001268301	ACOC_0001268301-mRNA-1;MSTRG.12392.1
MSTRG.12393	ACOC_0001268401	ACOC_0001268401-mRNA-1;MSTRG.12393.1;MSTRG.12393.2
MSTRG.12395	ACOC_0001268701	ACOC_0001268701-mRNA-1;MSTRG.12395.1
MSTRG.12396	ACOC_0001268801	ACOC_0001268801-mRNA-1;MSTRG.12396.1
MSTRG.12399	ACOC_0001269001	ACOC_0001269001-mRNA-1;MSTRG.12399.1
MSTRG.124	ACOC_0000014201	ACOC_0000014201-mRNA-1;MSTRG.124.1
MSTRG.1240	ACOC_0000131501	ACOC_0000131501-mRNA-1;MSTRG.1240.1
MSTRG.12401	ACOC_0001269101	ACOC_0001269101-mRNA-1;MSTRG.12401.2
MSTRG.12403	ACOC_0001269201	ACOC_0001269201-mRNA-1;MSTRG.12403.1
MSTRG.12404	ACOC_0001269301	ACOC_0001269301-mRNA-1;MSTRG.12404.1
MSTRG.12405	ACOC_0001269401	ACOC_0001269401-mRNA-1;MSTRG.12405.1
MSTRG.12408	ACOC_0001269701	ACOC_0001269701-mRNA-1;MSTRG.12408.1
MSTRG.12409	ACOC_0001269801	ACOC_0001269801-mRNA-1;MSTRG.12409.1
MSTRG.1241	ACOC_0000131601	ACOC_0000131601-mRNA-1;MSTRG.1241.1;MSTRG.1241.2
MSTRG.12410	ACOC_0001270001	ACOC_0001270001-mRNA-1;MSTRG.12410.1
MSTRG.12412	ACOC_0001270201	ACOC_0001270201-mRNA-1;MSTRG.12412.1
MSTRG.12414	ACOC_0001270401	ACOC_0001270401-mRNA-1;MSTRG.12414.1
MSTRG.12415	ACOC_0001270601	ACOC_0001270601-mRNA-1;MSTRG.12415.2
MSTRG.12417	ACOC_0001271001	ACOC_0001271001-mRNA-1;MSTRG.12417.1
MSTRG.12419	ACOC_0001271101	ACOC_0001271101-mRNA-1;MSTRG.12419.1
MSTRG.1242	ACOC_0000131701	ACOC_0000131701-mRNA-1;MSTRG.1242.1
MSTRG.12420	ACOC_0001271301	ACOC_0001271301-mRNA-1;MSTRG.12420.1
MSTRG.12421	ACOC_0001271401	ACOC_0001271401-mRNA-1;MSTRG.12421.1
MSTRG.12424	ACOC_0001271801	ACOC_0001271801-mRNA-1;MSTRG.12424.1;MSTRG.12424.3
MSTRG.12426	ACOC_0001271901	ACOC_0001271901-mRNA-1;MSTRG.12426.1
MSTRG.1243	ACOC_0000131801	ACOC_0000131801-mRNA-1;MSTRG.1243.1
MSTRG.12430	ACOC_0001272201	ACOC_0001272201-mRNA-1;MSTRG.12430.2
MSTRG.12431	ACOC_0001272301	ACOC_0001272301-mRNA-1;MSTRG.12431.1
MSTRG.12432	ACOC_0001272801	ACOC_0001272801-mRNA-1;MSTRG.12432.2
MSTRG.12433	ACOC_0001272901	ACOC_0001272901-mRNA-1;MSTRG.12433.2
MSTRG.12434	ACOC_0001272601	ACOC_0001272601-mRNA-1;MSTRG.12434.1
MSTRG.12435	ACOC_0001272701	ACOC_0001272701-mRNA-1;MSTRG.12435.1
MSTRG.1244	ACOC_0000131901	ACOC_0000131901-mRNA-1;MSTRG.1244.1
MSTRG.12440	ACOC_0001273301	ACOC_0001273301-mRNA-1;MSTRG.12440.1
MSTRG.12441	ACOC_0001273401	ACOC_0001273401-mRNA-1;MSTRG.12441.1
MSTRG.12446	ACOC_0001273901	ACOC_0001273901-mRNA-1;MSTRG.12446.1;MSTRG.12446.3
MSTRG.12449	ACOC_0001274301	ACOC_0001274301-mRNA-1;MSTRG.12449.1
MSTRG.12451	ACOC_0001274501	ACOC_0001274501-mRNA-1;MSTRG.12451.1
MSTRG.12453	ACOC_0001274701	ACOC_0001274701-mRNA-1;MSTRG.12453.1;MSTRG.12453.2
MSTRG.12454	ACOC_0001274801	ACOC_0001274801-mRNA-1;MSTRG.12454.2
MSTRG.12455	ACOC_0001274901	ACOC_0001274901-mRNA-1;MSTRG.12455.1
MSTRG.12456	ACOC_0001275001	ACOC_0001275001-mRNA-1;MSTRG.12456.2
MSTRG.12457	ACOC_0001275101	ACOC_0001275101-mRNA-1;MSTRG.12457.1
MSTRG.12458	ACOC_0001275201	ACOC_0001275201-mRNA-1;MSTRG.12458.1
MSTRG.12461	ACOC_0001275301	ACOC_0001275301-mRNA-1;MSTRG.12461.2
MSTRG.12462	ACOC_0001275401	ACOC_0001275401-mRNA-1;MSTRG.12462.1
MSTRG.12463	ACOC_0001275501	ACOC_0001275501-mRNA-1;MSTRG.12463.1
MSTRG.12465	ACOC_0001275801	ACOC_0001275801-mRNA-1;MSTRG.12465.1
MSTRG.12466	ACOC_0001275901	ACOC_0001275901-mRNA-1;MSTRG.12466.1;MSTRG.12466.2
MSTRG.12467	ACOC_0001276001	ACOC_0001276001-mRNA-1;MSTRG.12467.1
MSTRG.12472	ACOC_0001276301	ACOC_0001276301-mRNA-1;MSTRG.12472.1
MSTRG.12473	ACOC_0001276401	ACOC_0001276401-mRNA-1;MSTRG.12473.1
MSTRG.12474	ACOC_0001276501	ACOC_0001276501-mRNA-1;MSTRG.12474.1
MSTRG.12475	ACOC_0001276601	ACOC_0001276601-mRNA-1;MSTRG.12475.1
MSTRG.12481	ACOC_0001277201	ACOC_0001277201-mRNA-1;MSTRG.12481.1
MSTRG.12482	ACOC_0001277301	ACOC_0001277301-mRNA-1;MSTRG.12482.1
MSTRG.12485	ACOC_0001277401	ACOC_0001277401-mRNA-1;MSTRG.12485.2
MSTRG.12486	ACOC_0001277501	ACOC_0001277501-mRNA-1;MSTRG.12486.1
MSTRG.12487	ACOC_0001277601	ACOC_0001277601-mRNA-1;MSTRG.12487.1
MSTRG.12490	ACOC_0001277901	ACOC_0001277901-mRNA-1;MSTRG.12490.1
MSTRG.12491	ACOC_0001278001	ACOC_0001278001-mRNA-1;MSTRG.12491.1
MSTRG.12494	ACOC_0001278301	ACOC_0001278301-mRNA-1;MSTRG.12494.1
MSTRG.12495	ACOC_0001278401	ACOC_0001278401-mRNA-1;MSTRG.12495.1
MSTRG.12496	ACOC_0001278501	ACOC_0001278501-mRNA-1;MSTRG.12496.1
MSTRG.12497	ACOC_0001278701	ACOC_0001278701-mRNA-1;MSTRG.12497.1;MSTRG.12497.2
MSTRG.12499	ACOC_0001278801	ACOC_0001278801-mRNA-1;MSTRG.12499.1
MSTRG.125	ACOC_0000014301	ACOC_0000014301-mRNA-1;MSTRG.125.1
MSTRG.1250	ACOC_0000132601	ACOC_0000132601-mRNA-1;MSTRG.1250.1
MSTRG.12501	ACOC_0001278901	ACOC_0001278901-mRNA-1;MSTRG.12501.1
MSTRG.12502	ACOC_0001279001	ACOC_0001279001-mRNA-1;MSTRG.12502.2
MSTRG.12504	ACOC_0001279201	ACOC_0001279201-mRNA-1;MSTRG.12504.1
MSTRG.1251	ACOC_0000132701	ACOC_0000132701-mRNA-1;MSTRG.1251.1;MSTRG.1251.2
MSTRG.12513	ACOC_0001280101	ACOC_0001280101-mRNA-1;MSTRG.12513.1
MSTRG.12514	ACOC_0001280201	ACOC_0001280201-mRNA-1;MSTRG.12514.1
MSTRG.12516	ACOC_0001280501	ACOC_0001280501-mRNA-1;MSTRG.12516.1
MSTRG.12519	ACOC_0001280901	ACOC_0001280901-mRNA-1;MSTRG.12519.1
MSTRG.1252	ACOC_0000132801	ACOC_0000132801-mRNA-1;MSTRG.1252.1;MSTRG.1252.2;MSTRG.1252.3
MSTRG.12520	ACOC_0001281001	ACOC_0001281001-mRNA-1;MSTRG.12520.1
MSTRG.12521	ACOC_0001281101	ACOC_0001281101-mRNA-1;MSTRG.12521.2;MSTRG.12521.3
MSTRG.12522	ACOC_0001281201	ACOC_0001281201-mRNA-1;MSTRG.12522.1;MSTRG.12522.2
MSTRG.12524	ACOC_0001281601	ACOC_0001281601-mRNA-1;MSTRG.12524.2
MSTRG.12525	ACOC_0001281701	ACOC_0001281701-mRNA-1;MSTRG.12525.1;MSTRG.12525.3
MSTRG.12527	ACOC_0001281801	ACOC_0001281801-mRNA-1;MSTRG.12527.1
MSTRG.12528	ACOC_0001282001	ACOC_0001282001-mRNA-1;MSTRG.12528.1
MSTRG.1253	ACOC_0000132901	ACOC_0000132901-mRNA-1;MSTRG.1253.1
MSTRG.12534	ACOC_0001282401	ACOC_0001282401-mRNA-1;MSTRG.12534.1
MSTRG.12535	ACOC_0001282501	ACOC_0001282501-mRNA-1;MSTRG.12535.1;MSTRG.12535.2
MSTRG.12536	ACOC_0001282601	ACOC_0001282601-mRNA-1;MSTRG.12536.2;MSTRG.12536.3;MSTRG.12536.4
MSTRG.12538	ACOC_0001282801	ACOC_0001282801-mRNA-1;MSTRG.12538.1
MSTRG.12539	ACOC_0001282901	ACOC_0001282901-mRNA-1;MSTRG.12539.1
MSTRG.1254	ACOC_0000133001	ACOC_0000133001-mRNA-1;MSTRG.1254.1
MSTRG.12540	ACOC_0001283101	ACOC_0001283101-mRNA-1;MSTRG.12540.1
MSTRG.12541	ACOC_0001283201	ACOC_0001283201-mRNA-1;MSTRG.12541.1
MSTRG.12543	ACOC_0001283301	ACOC_0001283301-mRNA-1;MSTRG.12543.2
MSTRG.12544	ACOC_0001283401	ACOC_0001283401-mRNA-1;MSTRG.12544.1
MSTRG.12545	ACOC_0001283501	ACOC_0001283501-mRNA-1;MSTRG.12545.1
MSTRG.12546	ACOC_0001283601	ACOC_0001283601-mRNA-1;MSTRG.12546.1;MSTRG.12546.2
MSTRG.12547	ACOC_0001283701	ACOC_0001283701-mRNA-1;MSTRG.12547.1
MSTRG.12549	ACOC_0001283901	ACOC_0001283901-mRNA-1;MSTRG.12549.1
MSTRG.1255	ACOC_0000133101	ACOC_0000133101-mRNA-1;MSTRG.1255.1
MSTRG.12550	ACOC_0001284001	ACOC_0001284001-mRNA-1;MSTRG.12550.1;MSTRG.12550.2
MSTRG.12551	ACOC_0001284201	ACOC_0001284201-mRNA-1;MSTRG.12551.1
MSTRG.12552	ACOC_0001284301	ACOC_0001284301-mRNA-1;MSTRG.12552.1
MSTRG.12555	ACOC_0001284501	ACOC_0001284501-mRNA-1;MSTRG.12555.1;MSTRG.12555.3
MSTRG.12556	ACOC_0001284801	ACOC_0001284801-mRNA-1;MSTRG.12556.1
MSTRG.12559	ACOC_0001285001	ACOC_0001285001-mRNA-1;MSTRG.12559.1;MSTRG.12559.3
MSTRG.12560	ACOC_0001285101	ACOC_0001285101-mRNA-1;MSTRG.12560.1
MSTRG.12561	ACOC_0001285201	ACOC_0001285201-mRNA-1;MSTRG.12561.1
MSTRG.12563	ACOC_0001285301	ACOC_0001285301-mRNA-1;MSTRG.12563.1
MSTRG.12564	ACOC_0001285401	ACOC_0001285401-mRNA-1;MSTRG.12564.2
MSTRG.12566	ACOC_0001285601	ACOC_0001285601-mRNA-1;MSTRG.12566.1
MSTRG.12567	ACOC_0001285901	ACOC_0001285901-mRNA-1;MSTRG.12567.1;MSTRG.12567.2
MSTRG.12569	ACOC_0001286001	ACOC_0001286001-mRNA-1;MSTRG.12569.2
MSTRG.1257	ACOC_0000133401	ACOC_0000133401-mRNA-1;MSTRG.1257.1
MSTRG.12570	ACOC_0001286101	ACOC_0001286101-mRNA-1;MSTRG.12570.1
MSTRG.12572	ACOC_0001286201	ACOC_0001286201-mRNA-1;MSTRG.12572.1
MSTRG.12578	ACOC_0001286401	ACOC_0001286401-mRNA-1;MSTRG.12578.1
MSTRG.12579	ACOC_0001286601	ACOC_0001286601-mRNA-1;MSTRG.12579.1
MSTRG.12580	ACOC_0001286701	ACOC_0001286701-mRNA-1;MSTRG.12580.1;MSTRG.12580.2
MSTRG.12581	ACOC_0001286801	ACOC_0001286801-mRNA-1;MSTRG.12581.1
MSTRG.12582	ACOC_0001286901	ACOC_0001286901-mRNA-1;MSTRG.12582.1
MSTRG.12583	ACOC_0001287001	ACOC_0001287001-mRNA-1;MSTRG.12583.1
MSTRG.12584	ACOC_0001287101	ACOC_0001287101-mRNA-1;MSTRG.12584.1
MSTRG.12586	ACOC_0001287301	ACOC_0001287301-mRNA-1;MSTRG.12586.1
MSTRG.12587	ACOC_0001287401	ACOC_0001287401-mRNA-1;MSTRG.12587.1
MSTRG.12590	ACOC_0001287501	ACOC_0001287501-mRNA-1;MSTRG.12590.2
MSTRG.12591	ACOC_0001287801	ACOC_0001287801-mRNA-1;MSTRG.12591.2
MSTRG.12592	ACOC_0001287901	ACOC_0001287901-mRNA-1;MSTRG.12592.1;MSTRG.12592.2;MSTRG.12592.3
MSTRG.12594	ACOC_0001288001	ACOC_0001288001-mRNA-1;MSTRG.12594.1
MSTRG.12595	ACOC_0001288101	ACOC_0001288101-mRNA-1;MSTRG.12595.1
MSTRG.12596	ACOC_0001288201	ACOC_0001288201-mRNA-1;MSTRG.12596.2
MSTRG.12599	ACOC_0001288401	ACOC_0001288401-mRNA-1;MSTRG.12599.1;MSTRG.12599.2
MSTRG.126	ACOC_0000014401	ACOC_0000014401-mRNA-1;MSTRG.126.1
MSTRG.1260	ACOC_0000133701	ACOC_0000133701-mRNA-1;MSTRG.1260.1
MSTRG.12602	ACOC_0001288601	ACOC_0001288601-mRNA-1;MSTRG.12602.2
MSTRG.12603	ACOC_0001288701	ACOC_0001288701-mRNA-1;MSTRG.12603.1
MSTRG.12605	ACOC_0001288801	ACOC_0001288801-mRNA-1;MSTRG.12605.1;MSTRG.12605.2
MSTRG.12606	ACOC_0001288901	ACOC_0001288901-mRNA-1;MSTRG.12606.1
MSTRG.12608	ACOC_0001289001	ACOC_0001289001-mRNA-1;MSTRG.12608.1
MSTRG.12609	ACOC_0001289101	ACOC_0001289101-mRNA-1;MSTRG.12609.1
MSTRG.12610	ACOC_0001289201	ACOC_0001289201-mRNA-1;MSTRG.12610.1
MSTRG.12611	ACOC_0001289301	ACOC_0001289301-mRNA-1;MSTRG.12611.1;MSTRG.12611.2;MSTRG.12611.3;MSTRG.12611.5
MSTRG.12613	ACOC_0001289501	ACOC_0001289501-mRNA-1;MSTRG.12613.1
MSTRG.12614	ACOC_0001289601	ACOC_0001289601-mRNA-1;MSTRG.12614.1
MSTRG.12615	ACOC_0001289701	ACOC_0001289701-mRNA-1;MSTRG.12615.2
MSTRG.12616	ACOC_0001289801	ACOC_0001289801-mRNA-1;MSTRG.12616.1
MSTRG.1262	ACOC_0000134101	ACOC_0000134101-mRNA-1;MSTRG.1262.1
MSTRG.12620	ACOC_0001290101	ACOC_0001290101-mRNA-1;MSTRG.12620.1;MSTRG.12620.2;MSTRG.12620.4;MSTRG.12620.5;MSTRG.12620.6
MSTRG.12622	ACOC_0001290501	ACOC_0001290501-mRNA-1;MSTRG.12622.1
MSTRG.12624	ACOC_0001290601	ACOC_0001290601-mRNA-1;MSTRG.12624.1
MSTRG.12626	ACOC_0001290701	ACOC_0001290701-mRNA-1;MSTRG.12626.1
MSTRG.12627	ACOC_0001290801	ACOC_0001290801-mRNA-1;MSTRG.12627.1
MSTRG.12628	ACOC_0001290901	ACOC_0001290901-mRNA-1;MSTRG.12628.2;MSTRG.12628.3
MSTRG.1263	ACOC_0000134201	ACOC_0000134201-mRNA-1;MSTRG.1263.1
MSTRG.12631	ACOC_0001291201	ACOC_0001291201-mRNA-1;MSTRG.12631.1
MSTRG.12632	ACOC_0001291301	ACOC_0001291301-mRNA-1;MSTRG.12632.2
MSTRG.12633	ACOC_0001291401	ACOC_0001291401-mRNA-1;MSTRG.12633.2
MSTRG.12634	ACOC_0001291501	ACOC_0001291501-mRNA-1;MSTRG.12634.1
MSTRG.12635	ACOC_0001291601	ACOC_0001291601-mRNA-1;MSTRG.12635.1
MSTRG.1264	ACOC_0000134401	ACOC_0000134401-mRNA-1;MSTRG.1264.2
MSTRG.12642	ACOC_0001292201	ACOC_0001292201-mRNA-1;MSTRG.12642.1
MSTRG.12644	ACOC_0001292701	ACOC_0001292701-mRNA-1;MSTRG.12644.1
MSTRG.12646	ACOC_0001292801	ACOC_0001292801-mRNA-1;MSTRG.12646.1
MSTRG.12648	ACOC_0001292901	ACOC_0001292901-mRNA-1;MSTRG.12648.2
MSTRG.12649	ACOC_0001293001	ACOC_0001293001-mRNA-1;MSTRG.12649.1
MSTRG.12651	ACOC_0001293101	ACOC_0001293101-mRNA-1;MSTRG.12651.1;MSTRG.12651.2
MSTRG.12652	ACOC_0001293201	ACOC_0001293201-mRNA-1;MSTRG.12652.1
MSTRG.12653	ACOC_0001293301	ACOC_0001293301-mRNA-1;MSTRG.12653.2
MSTRG.12654	ACOC_0001293401	ACOC_0001293401-mRNA-1;MSTRG.12654.1
MSTRG.12655	ACOC_0001293501	ACOC_0001293501-mRNA-1;MSTRG.12655.1;MSTRG.12655.3
MSTRG.12657	ACOC_0001293901	ACOC_0001293901-mRNA-1;MSTRG.12657.1
MSTRG.1266	ACOC_0000134601	ACOC_0000134601-mRNA-1;MSTRG.1266.1;MSTRG.1266.2;MSTRG.1266.3;MSTRG.1266.4
MSTRG.12661	ACOC_0001294501	ACOC_0001294501-mRNA-1;MSTRG.12661.2
MSTRG.12662	ACOC_0001294701	ACOC_0001294701-mRNA-1;MSTRG.12662.1
MSTRG.12663	ACOC_0001294801	ACOC_0001294801-mRNA-1;MSTRG.12663.1;MSTRG.12663.2
MSTRG.12665	ACOC_0001294901	ACOC_0001294901-mRNA-1;MSTRG.12665.1
MSTRG.12666	ACOC_0001295001	ACOC_0001295001-mRNA-1;MSTRG.12666.1
MSTRG.12669	ACOC_0001295301	ACOC_0001295301-mRNA-1;MSTRG.12669.1
MSTRG.1267	ACOC_0000134701	ACOC_0000134701-mRNA-1;MSTRG.1267.1;MSTRG.1267.2
MSTRG.12670	ACOC_0001295401	ACOC_0001295401-mRNA-1;MSTRG.12670.1
MSTRG.12673	ACOC_0001295701	ACOC_0001295701-mRNA-1;MSTRG.12673.1
MSTRG.12674	ACOC_0001295801	ACOC_0001295801-mRNA-1;MSTRG.12674.2
MSTRG.12677	ACOC_0001296101	ACOC_0001296101-mRNA-1;MSTRG.12677.1;MSTRG.12677.2;MSTRG.12677.3
MSTRG.12678	ACOC_0001296201	ACOC_0001296201-mRNA-1;MSTRG.12678.1
MSTRG.1268	ACOC_0000134801	ACOC_0000134801-mRNA-1;MSTRG.1268.2
MSTRG.12680	ACOC_0001296401	ACOC_0001296401-mRNA-1;MSTRG.12680.1
MSTRG.12681	ACOC_0001296501	ACOC_0001296501-mRNA-1;MSTRG.12681.1
MSTRG.12685	ACOC_0001296801	ACOC_0001296801-mRNA-1;MSTRG.12685.2;MSTRG.12685.3
MSTRG.12686	ACOC_0001296901	ACOC_0001296901-mRNA-1;MSTRG.12686.2
MSTRG.12687	ACOC_0001297101	ACOC_0001297101-mRNA-1;MSTRG.12687.1;MSTRG.12687.2
MSTRG.12688	ACOC_0001297201	ACOC_0001297201-mRNA-1;MSTRG.12688.1
MSTRG.12689	ACOC_0001297301	ACOC_0001297301-mRNA-1;MSTRG.12689.1;MSTRG.12689.2
MSTRG.1269	ACOC_0000134901	ACOC_0000134901-mRNA-1;MSTRG.1269.1
MSTRG.12691	ACOC_0001297401	ACOC_0001297401-mRNA-1;MSTRG.12691.1
MSTRG.12692	ACOC_0001297501	ACOC_0001297501-mRNA-1;MSTRG.12692.1
MSTRG.12694	ACOC_0001297901	ACOC_0001297901-mRNA-1;MSTRG.12694.1
MSTRG.12695	ACOC_0001298001	ACOC_0001298001-mRNA-1;MSTRG.12695.2
MSTRG.12699	ACOC_0001298301	ACOC_0001298301-mRNA-1;MSTRG.12699.2;MSTRG.12699.3
MSTRG.127	ACOC_0000014501	ACOC_0000014501-mRNA-1;MSTRG.127.1
MSTRG.1270	ACOC_0000135001	ACOC_0000135001-mRNA-1;MSTRG.1270.1
MSTRG.12700	ACOC_0001298401	ACOC_0001298401-mRNA-1;MSTRG.12700.1
MSTRG.12701	ACOC_0001298501	ACOC_0001298501-mRNA-1;MSTRG.12701.1
MSTRG.12707	ACOC_0001299001	ACOC_0001299001-mRNA-1;MSTRG.12707.1
MSTRG.1271	ACOC_0000135101	ACOC_0000135101-mRNA-1;MSTRG.1271.1;MSTRG.1271.2
MSTRG.12711	ACOC_0001299401	ACOC_0001299401-mRNA-1;MSTRG.12711.2
MSTRG.12712	ACOC_0001299501	ACOC_0001299501-mRNA-1;MSTRG.12712.1
MSTRG.12714	ACOC_0001299801	ACOC_0001299801-mRNA-1;MSTRG.12714.1
MSTRG.12716	ACOC_0001300201	ACOC_0001300201-mRNA-1;MSTRG.12716.1
MSTRG.12719	ACOC_0001300501	ACOC_0001300501-mRNA-1;MSTRG.12719.1
MSTRG.1272	ACOC_0000135201	ACOC_0000135201-mRNA-1;MSTRG.1272.1
MSTRG.12720	ACOC_0001300601	ACOC_0001300601-mRNA-1;MSTRG.12720.1
MSTRG.12721	ACOC_0001300701	ACOC_0001300701-mRNA-1;MSTRG.12721.1;MSTRG.12721.2
MSTRG.12722	ACOC_0001300901	ACOC_0001300901-mRNA-1;MSTRG.12722.1
MSTRG.12724	ACOC_0001301101	ACOC_0001301101-mRNA-1;MSTRG.12724.1
MSTRG.12726	ACOC_0001301301	ACOC_0001301301-mRNA-1;MSTRG.12726.1;MSTRG.12726.3
MSTRG.1273	ACOC_0000135301	ACOC_0000135301-mRNA-1;MSTRG.1273.1;MSTRG.1273.2
MSTRG.12731	ACOC_0001301501	ACOC_0001301501-mRNA-1;MSTRG.12731.1
MSTRG.12732	ACOC_0001301701	ACOC_0001301701-mRNA-1;MSTRG.12732.2
MSTRG.12733	ACOC_0001301801	ACOC_0001301801-mRNA-1;MSTRG.12733.2
MSTRG.12734	ACOC_0001301901	ACOC_0001301901-mRNA-1;MSTRG.12734.2
MSTRG.12735	ACOC_0001302001	ACOC_0001302001-mRNA-1;MSTRG.12735.2;MSTRG.12735.3
MSTRG.12736	ACOC_0001302101	ACOC_0001302101-mRNA-1;MSTRG.12736.2
MSTRG.12737	ACOC_0001302201	ACOC_0001302201-mRNA-1;MSTRG.12737.1
MSTRG.1274	ACOC_0000135401	ACOC_0000135401-mRNA-1;MSTRG.1274.1
MSTRG.12740	ACOC_0001302401	ACOC_0001302401-mRNA-1;MSTRG.12740.1
MSTRG.12743	ACOC_0001302501	ACOC_0001302501-mRNA-1;MSTRG.12743.1
MSTRG.12746	ACOC_0001302801	ACOC_0001302801-mRNA-1;MSTRG.12746.1
MSTRG.12747	ACOC_0001302901	ACOC_0001302901-mRNA-1;MSTRG.12747.2
MSTRG.12748	ACOC_0001303001	ACOC_0001303001-mRNA-1;MSTRG.12748.1
MSTRG.12749	ACOC_0001303101	ACOC_0001303101-mRNA-1;MSTRG.12749.1;MSTRG.12749.3
MSTRG.1275	ACOC_0000135501	ACOC_0000135501-mRNA-1;MSTRG.1275.1
MSTRG.12750	ACOC_0001303201	ACOC_0001303201-mRNA-1;MSTRG.12750.1
MSTRG.12752	ACOC_0001303301	ACOC_0001303301-mRNA-1;MSTRG.12752.1
MSTRG.12753	ACOC_0001303401	ACOC_0001303401-mRNA-1;MSTRG.12753.2;MSTRG.12753.3;MSTRG.12753.4
MSTRG.12754	ACOC_0001303601	ACOC_0001303601-mRNA-1;MSTRG.12754.1
MSTRG.12755	ACOC_0001303801	ACOC_0001303801-mRNA-1;MSTRG.12755.1
MSTRG.12758	ACOC_0001304201	ACOC_0001304201-mRNA-1;MSTRG.12758.1;MSTRG.12758.2
MSTRG.1276	ACOC_0000135601	ACOC_0000135601-mRNA-1;MSTRG.1276.1
MSTRG.12760	ACOC_0001304301	ACOC_0001304301-mRNA-1;MSTRG.12760.1
MSTRG.12762	ACOC_0001304501	ACOC_0001304501-mRNA-1;MSTRG.12762.1
MSTRG.12763	ACOC_0001304601	ACOC_0001304601-mRNA-1;MSTRG.12763.1
MSTRG.12764	ACOC_0001304701	ACOC_0001304701-mRNA-1;MSTRG.12764.1
MSTRG.12765	ACOC_0001304801	ACOC_0001304801-mRNA-1;MSTRG.12765.1
MSTRG.12766	ACOC_0001304901	ACOC_0001304901-mRNA-1;MSTRG.12766.1
MSTRG.12767	ACOC_0001305001	ACOC_0001305001-mRNA-1;MSTRG.12767.2
MSTRG.12769	ACOC_0001305101	ACOC_0001305101-mRNA-1;MSTRG.12769.1
MSTRG.12770	ACOC_0001305201	ACOC_0001305201-mRNA-1;MSTRG.12770.1
MSTRG.12771	ACOC_0001305301	ACOC_0001305301-mRNA-1;MSTRG.12771.1
MSTRG.12772	ACOC_0001305501	ACOC_0001305501-mRNA-1;MSTRG.12772.1
MSTRG.12773	ACOC_0001305601	ACOC_0001305601-mRNA-1;MSTRG.12773.1
MSTRG.12775	ACOC_0001305701	ACOC_0001305701-mRNA-1;MSTRG.12775.1
MSTRG.12776	ACOC_0001305801	ACOC_0001305801-mRNA-1;MSTRG.12776.1
MSTRG.12777	ACOC_0001305901	ACOC_0001305901-mRNA-1;MSTRG.12777.1
MSTRG.12781	ACOC_0001306201	ACOC_0001306201-mRNA-1;MSTRG.12781.1
MSTRG.12782	ACOC_0001306301	ACOC_0001306301-mRNA-1;MSTRG.12782.1
MSTRG.12785	ACOC_0001306501	ACOC_0001306501-mRNA-1;MSTRG.12785.1
MSTRG.12787	ACOC_0001306801	ACOC_0001306801-mRNA-1;MSTRG.12787.1
MSTRG.12788	ACOC_0001307001	ACOC_0001307001-mRNA-1;MSTRG.12788.1
MSTRG.12790	ACOC_0001307401	ACOC_0001307401-mRNA-1;MSTRG.12790.1
MSTRG.12791	ACOC_0001307501	ACOC_0001307501-mRNA-1;MSTRG.12791.2
MSTRG.12792	ACOC_0001307601	ACOC_0001307601-mRNA-1;MSTRG.12792.1
MSTRG.12795	ACOC_0001308101	ACOC_0001308101-mRNA-1;MSTRG.12795.1
MSTRG.12796	ACOC_0001308201	ACOC_0001308201-mRNA-1;MSTRG.12796.1
MSTRG.12799	ACOC_0001308401	ACOC_0001308401-mRNA-1;MSTRG.12799.1
MSTRG.128	ACOC_0000014601	ACOC_0000014601-mRNA-1;MSTRG.128.1
MSTRG.1280	ACOC_0000136201	ACOC_0000136201-mRNA-1;MSTRG.1280.1
MSTRG.12800	ACOC_0001308501	ACOC_0001308501-mRNA-1;MSTRG.12800.2
MSTRG.12801	ACOC_0001308601	ACOC_0001308601-mRNA-1;MSTRG.12801.2
MSTRG.12803	ACOC_0001308801	ACOC_0001308801-mRNA-1;MSTRG.12803.1
MSTRG.12804	ACOC_0001308901	ACOC_0001308901-mRNA-1;MSTRG.12804.1
MSTRG.12806	ACOC_0001309101	ACOC_0001309101-mRNA-1;MSTRG.12806.1
MSTRG.12807	ACOC_0001309201	ACOC_0001309201-mRNA-1;MSTRG.12807.1
MSTRG.12808	ACOC_0001309301	ACOC_0001309301-mRNA-1;MSTRG.12808.2
MSTRG.12812	ACOC_0001309801	ACOC_0001309801-mRNA-1;MSTRG.12812.2
MSTRG.12815	ACOC_0001310001	ACOC_0001310001-mRNA-1;MSTRG.12815.1
MSTRG.12816	ACOC_0001310301	ACOC_0001310301-mRNA-1;MSTRG.12816.1
MSTRG.12817	ACOC_0001310401	ACOC_0001310401-mRNA-1;MSTRG.12817.1
MSTRG.1282	ACOC_0000136301	ACOC_0000136301-mRNA-1;MSTRG.1282.1
MSTRG.12820	ACOC_0001310701	ACOC_0001310701-mRNA-1;MSTRG.12820.1
MSTRG.12821	ACOC_0001310801	ACOC_0001310801-mRNA-1;MSTRG.12821.1;MSTRG.12821.3
MSTRG.12823	ACOC_0001311001	ACOC_0001311001-mRNA-1;MSTRG.12823.1
MSTRG.12825	ACOC_0001311201	ACOC_0001311201-mRNA-1;MSTRG.12825.1
MSTRG.12826	ACOC_0001311301	ACOC_0001311301-mRNA-1;MSTRG.12826.2
MSTRG.12828	ACOC_0001311501	ACOC_0001311501-mRNA-1;MSTRG.12828.1
MSTRG.12830	ACOC_0001311601	ACOC_0001311601-mRNA-1;MSTRG.12830.2
MSTRG.12833	ACOC_0001311901	ACOC_0001311901-mRNA-1;MSTRG.12833.1
MSTRG.12834	ACOC_0001312001	ACOC_0001312001-mRNA-1;MSTRG.12834.1
MSTRG.12835	ACOC_0001312101	ACOC_0001312101-mRNA-1;MSTRG.12835.2
MSTRG.12836	ACOC_0001312201	ACOC_0001312201-mRNA-1;MSTRG.12836.1
MSTRG.12839	ACOC_0001312601	ACOC_0001312601-mRNA-1;MSTRG.12839.1;MSTRG.12839.2
MSTRG.1284	ACOC_0000136601	ACOC_0000136601-mRNA-1;MSTRG.1284.2
MSTRG.12841	ACOC_0001312701	ACOC_0001312701-mRNA-1;MSTRG.12841.1;MSTRG.12841.2;MSTRG.12841.4
MSTRG.12842	ACOC_0001312801	ACOC_0001312801-mRNA-1;MSTRG.12842.2
MSTRG.12843	ACOC_0001312901	ACOC_0001312901-mRNA-1;MSTRG.12843.1
MSTRG.12845	ACOC_0001313101	ACOC_0001313101-mRNA-1;MSTRG.12845.1
MSTRG.12846	ACOC_0001313201	ACOC_0001313201-mRNA-1;MSTRG.12846.1
MSTRG.12847	ACOC_0001313401	ACOC_0001313401-mRNA-1;MSTRG.12847.1;MSTRG.12847.2
MSTRG.12849	ACOC_0001313501	ACOC_0001313501-mRNA-1;MSTRG.12849.2
MSTRG.1285	ACOC_0000136701	ACOC_0000136701-mRNA-1;MSTRG.1285.1
MSTRG.12851	ACOC_0001313601	ACOC_0001313601-mRNA-1;MSTRG.12851.2
MSTRG.12852	ACOC_0001313701	ACOC_0001313701-mRNA-1;MSTRG.12852.1
MSTRG.12853	ACOC_0001313801	ACOC_0001313801-mRNA-1;MSTRG.12853.2
MSTRG.12854	ACOC_0001314001	ACOC_0001314001-mRNA-1;MSTRG.12854.1
MSTRG.12857	ACOC_0001314401	ACOC_0001314401-mRNA-1;MSTRG.12857.1
MSTRG.12858	ACOC_0001314501	ACOC_0001314501-mRNA-1;MSTRG.12858.1
MSTRG.1286	ACOC_0000136801	ACOC_0000136801-mRNA-1;MSTRG.1286.1
MSTRG.12860	ACOC_0001315001	ACOC_0001315001-mRNA-1;MSTRG.12860.2
MSTRG.12864	ACOC_0001315401	ACOC_0001315401-mRNA-1;MSTRG.12864.1
MSTRG.12867	ACOC_0001315601	ACOC_0001315601-mRNA-1;MSTRG.12867.1
MSTRG.12868	ACOC_0001315701	ACOC_0001315701-mRNA-1;MSTRG.12868.1
MSTRG.12870	ACOC_0001315801	ACOC_0001315801-mRNA-1;MSTRG.12870.2
MSTRG.12872	ACOC_0001316001	ACOC_0001316001-mRNA-1;MSTRG.12872.2
MSTRG.12874	ACOC_0001316601	ACOC_0001316601-mRNA-1;MSTRG.12874.1
MSTRG.12875	ACOC_0001316801	ACOC_0001316801-mRNA-1;MSTRG.12875.1
MSTRG.12876	ACOC_0001316901	ACOC_0001316901-mRNA-1;MSTRG.12876.1
MSTRG.12877	ACOC_0001316701	ACOC_0001316701-mRNA-1;MSTRG.12877.1
MSTRG.12878	ACOC_0001317001	ACOC_0001317001-mRNA-1;MSTRG.12878.2
MSTRG.12879	ACOC_0001317101	ACOC_0001317101-mRNA-1;MSTRG.12879.2
MSTRG.12881	ACOC_0001317201	ACOC_0001317201-mRNA-1;MSTRG.12881.1
MSTRG.12882	ACOC_0001317301	ACOC_0001317301-mRNA-1;MSTRG.12882.1
MSTRG.12884	ACOC_0001317401	ACOC_0001317401-mRNA-1;MSTRG.12884.1
MSTRG.12885	ACOC_0001317501	ACOC_0001317501-mRNA-1;MSTRG.12885.1
MSTRG.12886	ACOC_0001317601	ACOC_0001317601-mRNA-1;MSTRG.12886.2
MSTRG.12888	ACOC_0001317801	ACOC_0001317801-mRNA-1;MSTRG.12888.1;MSTRG.12888.2
MSTRG.12889	ACOC_0001318001	ACOC_0001318001-mRNA-1;MSTRG.12889.2
MSTRG.1289	ACOC_0000137001	ACOC_0000137001-mRNA-1;MSTRG.1289.1
MSTRG.12890	ACOC_0001318201	ACOC_0001318201-mRNA-1;MSTRG.12890.1
MSTRG.12897	ACOC_0001318801	ACOC_0001318801-mRNA-1;MSTRG.12897.1
MSTRG.12899	ACOC_0001318901	ACOC_0001318901-mRNA-1;MSTRG.12899.1
MSTRG.12902	ACOC_0001319301	ACOC_0001319301-mRNA-1;MSTRG.12902.1
MSTRG.12903	ACOC_0001319401	ACOC_0001319401-mRNA-1;MSTRG.12903.1
MSTRG.12905	ACOC_0001319801	ACOC_0001319801-mRNA-1;MSTRG.12905.1
MSTRG.12909	ACOC_0001320101	ACOC_0001320101-mRNA-1;MSTRG.12909.2
MSTRG.1291	ACOC_0000137201	ACOC_0000137201-mRNA-1;MSTRG.1291.1
MSTRG.12911	ACOC_0001320301	ACOC_0001320301-mRNA-1;MSTRG.12911.1
MSTRG.12912	ACOC_0001320401	ACOC_0001320401-mRNA-1;MSTRG.12912.1
MSTRG.12913	ACOC_0001320501	ACOC_0001320501-mRNA-1;MSTRG.12913.1;MSTRG.12913.2
MSTRG.12915	ACOC_0001320801	ACOC_0001320801-mRNA-1;MSTRG.12915.2
MSTRG.12917	ACOC_0001321201	ACOC_0001321201-mRNA-1;MSTRG.12917.2
MSTRG.1292	ACOC_0000137301	ACOC_0000137301-mRNA-1;MSTRG.1292.1;MSTRG.1292.2;MSTRG.1292.4
MSTRG.12923	ACOC_0001321601	ACOC_0001321601-mRNA-1;MSTRG.12923.1
MSTRG.12925	ACOC_0001321701	ACOC_0001321701-mRNA-1;MSTRG.12925.1
MSTRG.12929	ACOC_0001322001	ACOC_0001322001-mRNA-1;MSTRG.12929.1
MSTRG.1293	ACOC_0000137401	ACOC_0000137401-mRNA-1;MSTRG.1293.1;MSTRG.1293.2
MSTRG.12930	ACOC_0001322501	ACOC_0001322501-mRNA-1;MSTRG.12930.2
MSTRG.12931	ACOC_0001322601	ACOC_0001322601-mRNA-1;MSTRG.12931.1
MSTRG.12932	ACOC_0001322701	ACOC_0001322701-mRNA-1;MSTRG.12932.2
MSTRG.12933	ACOC_0001322801	ACOC_0001322801-mRNA-1;MSTRG.12933.1;MSTRG.12933.2
MSTRG.12934	ACOC_0001322901	ACOC_0001322901-mRNA-1;MSTRG.12934.1;MSTRG.12934.3
MSTRG.12938	ACOC_0001323301	ACOC_0001323301-mRNA-1;MSTRG.12938.1
MSTRG.1294	ACOC_0000137501	ACOC_0000137501-mRNA-1;MSTRG.1294.1
MSTRG.12940	ACOC_0001323501	ACOC_0001323501-mRNA-1;MSTRG.12940.1
MSTRG.12941	ACOC_0001323601	ACOC_0001323601-mRNA-1;MSTRG.12941.1;MSTRG.12941.2;MSTRG.12941.4;MSTRG.12941.5
MSTRG.12942	ACOC_0001323701	ACOC_0001323701-mRNA-1;MSTRG.12942.1;MSTRG.12942.2
MSTRG.12945	ACOC_0001324001	ACOC_0001324001-mRNA-1;MSTRG.12945.1;MSTRG.12945.2
MSTRG.12947	ACOC_0001324301	ACOC_0001324301-mRNA-1;MSTRG.12947.1
MSTRG.12949	ACOC_0001324501	ACOC_0001324501-mRNA-1;MSTRG.12949.1
MSTRG.1295	ACOC_0000137601	ACOC_0000137601-mRNA-1;MSTRG.1295.1;MSTRG.1295.2
MSTRG.12955	ACOC_0001325101	ACOC_0001325101-mRNA-1;MSTRG.12955.2
MSTRG.12958	ACOC_0001325301	ACOC_0001325301-mRNA-1;MSTRG.12958.2
MSTRG.12959	ACOC_0001325401	ACOC_0001325401-mRNA-1;MSTRG.12959.2
MSTRG.1296	ACOC_0000137801	ACOC_0000137801-mRNA-1;MSTRG.1296.1
MSTRG.12960	ACOC_0001325501	ACOC_0001325501-mRNA-1;MSTRG.12960.1;MSTRG.12960.2
MSTRG.12963	ACOC_0001325701	ACOC_0001325701-mRNA-1;MSTRG.12963.2
MSTRG.12965	ACOC_0001325801	ACOC_0001325801-mRNA-1;MSTRG.12965.1;MSTRG.12965.3
MSTRG.12968	ACOC_0001326001	ACOC_0001326001-mRNA-1;MSTRG.12968.1
MSTRG.12969	ACOC_0001326101	ACOC_0001326101-mRNA-1;MSTRG.12969.2
MSTRG.1297	ACOC_0000137901	ACOC_0000137901-mRNA-1;MSTRG.1297.2
MSTRG.12970	ACOC_0001326201	ACOC_0001326201-mRNA-1;MSTRG.12970.1
MSTRG.12972	ACOC_0001326301	ACOC_0001326301-mRNA-1;MSTRG.12972.1
MSTRG.12973	ACOC_0001326501	ACOC_0001326501-mRNA-1;MSTRG.12973.1
MSTRG.12974	ACOC_0001326601	ACOC_0001326601-mRNA-1;MSTRG.12974.1
MSTRG.12975	ACOC_0001326801	ACOC_0001326801-mRNA-1;MSTRG.12975.1
MSTRG.12976	ACOC_0001327001	ACOC_0001327001-mRNA-1;MSTRG.12976.1
MSTRG.12980	ACOC_0001327201	ACOC_0001327201-mRNA-1;MSTRG.12980.1
MSTRG.12984	ACOC_0001327401	ACOC_0001327401-mRNA-1;MSTRG.12984.2
MSTRG.1299	ACOC_0000138001	ACOC_0000138001-mRNA-1;MSTRG.1299.1
MSTRG.12991	ACOC_0001327901	ACOC_0001327901-mRNA-1;MSTRG.12991.1
MSTRG.12993	ACOC_0001328201	ACOC_0001328201-mRNA-1;MSTRG.12993.1
MSTRG.12995	ACOC_0001328301	ACOC_0001328301-mRNA-1;MSTRG.12995.1
MSTRG.12996	ACOC_0001328401	ACOC_0001328401-mRNA-1;MSTRG.12996.2
MSTRG.12998	ACOC_0001328601	ACOC_0001328601-mRNA-1;MSTRG.12998.1
[truncated: 6,146 more rows]
