# Supplementary material for: Identification of Novel Genes and Proteoforms in Angiostrongylus costaricensis through a Proteogenomic Approach
Source: Pathogens. 2022 Oct 31;11(11):1273. doi: 10.3390/pathogens11111273 (PMC9694666; doi:10.3390/pathogens11111273)
Supplement: Supplementary file 1 [file pathogens-11-01273-s001.zip › Supplemental_Data_S5.xlsx]

## Sheet: BRAKER
Supplemental Data S5. BRAKER
Gene ID	Transcript IDs
MSTRG.10001	MSTRG.10001.1
MSTRG.10006	MSTRG.10006.1;MSTRG.10006.2
MSTRG.10026	MSTRG.10026.1
MSTRG.10035	MSTRG.10035.1
MSTRG.10040	MSTRG.10040.1
MSTRG.10044	MSTRG.10044.1
MSTRG.10047	MSTRG.10047.1;MSTRG.10047.2
MSTRG.10062	MSTRG.10062.1
MSTRG.10070	MSTRG.10070.1
MSTRG.10085	MSTRG.10085.1
MSTRG.10101	MSTRG.10101.1
MSTRG.10110	MSTRG.10110.1
MSTRG.10117	MSTRG.10117.1
MSTRG.10120	MSTRG.10120.1
MSTRG.10131	MSTRG.10131.1
MSTRG.10134	MSTRG.10134.1
MSTRG.10135	MSTRG.10135.1
MSTRG.10136	MSTRG.10136.1
MSTRG.10140	MSTRG.10140.1
MSTRG.10150	MSTRG.10150.1
MSTRG.10157	MSTRG.10157.1
MSTRG.10161	MSTRG.10161.1
MSTRG.10163	MSTRG.10163.1
MSTRG.10164	MSTRG.10164.1
MSTRG.10172	MSTRG.10172.1
MSTRG.10175	MSTRG.10175.1
MSTRG.10176	MSTRG.10176.1
MSTRG.1018	MSTRG.1018.1
MSTRG.10187	MSTRG.10187.1
MSTRG.10188	MSTRG.10188.1
MSTRG.10197	MSTRG.10197.1
MSTRG.10198	MSTRG.10198.1
MSTRG.1020	MSTRG.1020.1
MSTRG.1021	MSTRG.1021.1
MSTRG.10213	MSTRG.10213.1
MSTRG.10214	MSTRG.10214.1
MSTRG.10220	MSTRG.10220.1
MSTRG.10225	MSTRG.10225.1
MSTRG.10226	MSTRG.10226.1
MSTRG.10227	MSTRG.10227.1
MSTRG.10229	MSTRG.10229.1
MSTRG.10233	MSTRG.10233.1
MSTRG.10244	MSTRG.10244.1
MSTRG.1025	MSTRG.1025.1
MSTRG.10250	MSTRG.10250.1
MSTRG.10255	MSTRG.10255.1;MSTRG.10255.2
MSTRG.10256	MSTRG.10256.1
MSTRG.10257	MSTRG.10257.1
MSTRG.10263	MSTRG.10263.1
MSTRG.10266	MSTRG.10266.1
MSTRG.10268	MSTRG.10268.1
MSTRG.10275	MSTRG.10275.1
MSTRG.10282	MSTRG.10282.1
MSTRG.10284	MSTRG.10284.1
MSTRG.10290	MSTRG.10290.1
MSTRG.10298	MSTRG.10298.1
MSTRG.10301	MSTRG.10301.1
MSTRG.1031	MSTRG.1031.1;MSTRG.1031.2
MSTRG.10313	MSTRG.10313.1
MSTRG.10323	MSTRG.10323.1
MSTRG.10328	MSTRG.10328.1
MSTRG.10331	MSTRG.10331.1
MSTRG.10338	MSTRG.10338.1
MSTRG.10339	MSTRG.10339.1
MSTRG.10343	MSTRG.10343.1
MSTRG.10352	MSTRG.10352.1
MSTRG.10355	MSTRG.10355.1
MSTRG.10383	MSTRG.10383.1
MSTRG.10396	MSTRG.10396.1
MSTRG.10399	MSTRG.10399.1
MSTRG.10405	MSTRG.10405.1
MSTRG.10408	MSTRG.10408.1
MSTRG.10413	MSTRG.10413.1
MSTRG.10419	MSTRG.10419.1
MSTRG.10420	MSTRG.10420.1
MSTRG.10430	MSTRG.10430.1
MSTRG.10431	MSTRG.10431.1
MSTRG.10432	MSTRG.10432.1
MSTRG.10436	MSTRG.10436.1
MSTRG.1044	MSTRG.1044.1
MSTRG.10443	MSTRG.10443.1
MSTRG.10444	MSTRG.10444.1
MSTRG.10445	MSTRG.10445.1
MSTRG.1045	MSTRG.1045.1
MSTRG.10450	MSTRG.10450.1
MSTRG.10459	MSTRG.10459.1
MSTRG.1046	MSTRG.1046.1;MSTRG.1046.2
MSTRG.10462	MSTRG.10462.1
MSTRG.10466	MSTRG.10466.1
MSTRG.10472	MSTRG.10472.1;MSTRG.10472.2
MSTRG.10473	MSTRG.10473.1;MSTRG.10473.2
MSTRG.10482	MSTRG.10482.1
MSTRG.10487	MSTRG.10487.1
MSTRG.1049	MSTRG.1049.1
MSTRG.10491	MSTRG.10491.1
MSTRG.10493	MSTRG.10493.1
MSTRG.105	MSTRG.105.1
MSTRG.10520	MSTRG.10520.1
MSTRG.10534	MSTRG.10534.1
MSTRG.10535	MSTRG.10535.1
MSTRG.10540	MSTRG.10540.1
MSTRG.10547	MSTRG.10547.1
MSTRG.10548	MSTRG.10548.1
MSTRG.1056	MSTRG.1056.1
MSTRG.10565	MSTRG.10565.1
MSTRG.10568	MSTRG.10568.1
MSTRG.10574	MSTRG.10574.1;MSTRG.10574.2
MSTRG.10576	MSTRG.10576.1;MSTRG.10576.2
MSTRG.1058	MSTRG.1058.1
MSTRG.10580	MSTRG.10580.1
MSTRG.10585	MSTRG.10585.1
MSTRG.10587	MSTRG.10587.1
MSTRG.10589	MSTRG.10589.1
MSTRG.10591	MSTRG.10591.1
MSTRG.10606	MSTRG.10606.1
MSTRG.10609	MSTRG.10609.1
MSTRG.10619	MSTRG.10619.1
MSTRG.1062	MSTRG.1062.1
MSTRG.10621	MSTRG.10621.1
MSTRG.10622	MSTRG.10622.1
MSTRG.10626	MSTRG.10626.1
MSTRG.10637	MSTRG.10637.1
MSTRG.10642	MSTRG.10642.1
MSTRG.10645	MSTRG.10645.1
MSTRG.10646	MSTRG.10646.1
MSTRG.10652	MSTRG.10652.1
MSTRG.10657	MSTRG.10657.1
MSTRG.10658	MSTRG.10658.1
MSTRG.10659	MSTRG.10659.1
MSTRG.1067	MSTRG.1067.1
MSTRG.10670	MSTRG.10670.1
MSTRG.10673	MSTRG.10673.1
MSTRG.10677	MSTRG.10677.1
MSTRG.10683	MSTRG.10683.1
MSTRG.10686	MSTRG.10686.1
MSTRG.10687	MSTRG.10687.1
MSTRG.10696	MSTRG.10696.1
MSTRG.10697	MSTRG.10697.1
MSTRG.10703	MSTRG.10703.1
MSTRG.10707	MSTRG.10707.1
MSTRG.10711	MSTRG.10711.1
MSTRG.10715	MSTRG.10715.1;MSTRG.10715.2
MSTRG.10731	MSTRG.10731.1
MSTRG.10737	MSTRG.10737.1
MSTRG.10759	MSTRG.10759.1
MSTRG.10762	MSTRG.10762.1
MSTRG.10771	MSTRG.10771.1
MSTRG.10785	MSTRG.10785.1;MSTRG.10785.2
MSTRG.108	MSTRG.108.1
MSTRG.10802	MSTRG.10802.1
MSTRG.10803	MSTRG.10803.1
MSTRG.10806	MSTRG.10806.1
MSTRG.10809	MSTRG.10809.1
MSTRG.10815	MSTRG.10815.1
MSTRG.10817	MSTRG.10817.1
MSTRG.10818	MSTRG.10818.1
MSTRG.10819	MSTRG.10819.1;MSTRG.10819.2
MSTRG.10821	MSTRG.10821.1
MSTRG.10822	MSTRG.10822.1
MSTRG.10828	MSTRG.10828.1
MSTRG.10829	MSTRG.10829.1
MSTRG.1083	MSTRG.1083.1
MSTRG.10830	MSTRG.10830.1
MSTRG.10831	MSTRG.10831.1
MSTRG.10835	MSTRG.10835.1;MSTRG.10835.2
MSTRG.10845	MSTRG.10845.1
MSTRG.10848	MSTRG.10848.1
MSTRG.10849	MSTRG.10849.1
MSTRG.1085	MSTRG.1085.1;MSTRG.1085.2
MSTRG.1086	MSTRG.1086.1
MSTRG.10863	MSTRG.10863.1
MSTRG.10874	MSTRG.10874.1
MSTRG.10878	MSTRG.10878.1
MSTRG.10882	MSTRG.10882.1
MSTRG.10884	MSTRG.10884.1
MSTRG.10886	MSTRG.10886.1
MSTRG.10887	MSTRG.10887.1
MSTRG.1089	MSTRG.1089.1
MSTRG.10897	MSTRG.10897.1
MSTRG.10898	MSTRG.10898.1
MSTRG.10900	MSTRG.10900.1
MSTRG.10902	MSTRG.10902.1
MSTRG.10907	MSTRG.10907.1
MSTRG.10914	MSTRG.10914.1
MSTRG.10915	MSTRG.10915.1
MSTRG.10918	MSTRG.10918.1
MSTRG.10920	MSTRG.10920.1
MSTRG.10924	MSTRG.10924.1
MSTRG.10925	MSTRG.10925.1
MSTRG.10926	MSTRG.10926.1
MSTRG.10928	MSTRG.10928.1
MSTRG.10940	MSTRG.10940.1
MSTRG.10942	MSTRG.10942.1
MSTRG.1095	MSTRG.1095.1
MSTRG.10953	MSTRG.10953.1
MSTRG.10954	MSTRG.10954.1
MSTRG.10956	MSTRG.10956.1
MSTRG.10962	MSTRG.10962.1
MSTRG.10964	MSTRG.10964.1
MSTRG.10967	MSTRG.10967.1
MSTRG.10969	MSTRG.10969.1
MSTRG.10980	MSTRG.10980.1
MSTRG.10982	MSTRG.10982.1
MSTRG.10987	MSTRG.10987.1
MSTRG.10997	MSTRG.10997.1
MSTRG.11002	MSTRG.11002.1
MSTRG.11006	MSTRG.11006.1
MSTRG.11007	MSTRG.11007.1
MSTRG.11018	MSTRG.11018.1
MSTRG.11022	MSTRG.11022.1
MSTRG.11026	MSTRG.11026.1
MSTRG.11030	MSTRG.11030.1
MSTRG.11032	MSTRG.11032.1
MSTRG.11038	MSTRG.11038.1
MSTRG.11040	MSTRG.11040.1
MSTRG.11049	MSTRG.11049.1
MSTRG.11056	MSTRG.11056.1
MSTRG.11066	MSTRG.11066.1
MSTRG.11076	MSTRG.11076.1
MSTRG.11086	MSTRG.11086.1
MSTRG.11093	MSTRG.11093.1
MSTRG.11094	MSTRG.11094.1
MSTRG.1110	MSTRG.1110.1;MSTRG.1110.2
MSTRG.11102	MSTRG.11102.1
MSTRG.11103	MSTRG.11103.1
MSTRG.11107	MSTRG.11107.1;MSTRG.11107.2
MSTRG.11109	MSTRG.11109.1
MSTRG.11116	MSTRG.11116.1
MSTRG.11125	MSTRG.11125.1
MSTRG.11159	MSTRG.11159.1
MSTRG.11161	MSTRG.11161.1
MSTRG.11173	MSTRG.11173.1
MSTRG.11182	MSTRG.11182.1;MSTRG.11182.2
MSTRG.11190	MSTRG.11190.1
MSTRG.11202	MSTRG.11202.1
MSTRG.11214	MSTRG.11214.1
MSTRG.11217	MSTRG.11217.1
MSTRG.11219	MSTRG.11219.1
MSTRG.11228	MSTRG.11228.1
MSTRG.11230	MSTRG.11230.1
MSTRG.11232	MSTRG.11232.1
MSTRG.11241	MSTRG.11241.1
MSTRG.11246	MSTRG.11246.1
MSTRG.11248	MSTRG.11248.1
MSTRG.11254	MSTRG.11254.1
MSTRG.11256	MSTRG.11256.1
MSTRG.11264	MSTRG.11264.1
MSTRG.11268	MSTRG.11268.1
MSTRG.11269	MSTRG.11269.1
MSTRG.1128	MSTRG.1128.1
MSTRG.11287	MSTRG.11287.1
MSTRG.11296	MSTRG.11296.1
MSTRG.11301	MSTRG.11301.1
MSTRG.11305	MSTRG.11305.1
MSTRG.11306	MSTRG.11306.1
MSTRG.1131	MSTRG.1131.1
MSTRG.11311	MSTRG.11311.1
MSTRG.11319	MSTRG.11319.1
MSTRG.11320	MSTRG.11320.1;MSTRG.11320.2
MSTRG.11329	MSTRG.11329.1
MSTRG.11331	MSTRG.11331.1
MSTRG.11332	MSTRG.11332.1
MSTRG.11334	MSTRG.11334.1
MSTRG.11341	MSTRG.11341.1
MSTRG.11343	MSTRG.11343.1
MSTRG.11344	MSTRG.11344.1
MSTRG.11349	MSTRG.11349.1;MSTRG.11349.2
MSTRG.1135	MSTRG.1135.1
MSTRG.11354	MSTRG.11354.1
MSTRG.11355	MSTRG.11355.1
MSTRG.11358	MSTRG.11358.1
MSTRG.11365	MSTRG.11365.1;MSTRG.11365.2
MSTRG.11366	MSTRG.11366.1
MSTRG.11373	MSTRG.11373.1
MSTRG.11376	MSTRG.11376.1
MSTRG.1138	MSTRG.1138.1
MSTRG.11381	MSTRG.11381.1
MSTRG.11382	MSTRG.11382.1
MSTRG.11386	MSTRG.11386.1
MSTRG.11390	MSTRG.11390.1
MSTRG.11391	MSTRG.11391.1
MSTRG.11392	MSTRG.11392.1
MSTRG.11396	MSTRG.11396.1
MSTRG.11406	MSTRG.11406.1
MSTRG.11409	MSTRG.11409.1
MSTRG.11413	MSTRG.11413.1
MSTRG.11416	MSTRG.11416.1
MSTRG.11418	MSTRG.11418.1
MSTRG.11419	MSTRG.11419.1
MSTRG.11420	MSTRG.11420.1
MSTRG.11421	MSTRG.11421.1;MSTRG.11421.2
MSTRG.11422	MSTRG.11422.1
MSTRG.11423	MSTRG.11423.1
MSTRG.11424	MSTRG.11424.1
MSTRG.11429	MSTRG.11429.1
MSTRG.11435	MSTRG.11435.1
MSTRG.11437	MSTRG.11437.1
MSTRG.11444	MSTRG.11444.1
MSTRG.11449	MSTRG.11449.1
MSTRG.11451	MSTRG.11451.1
MSTRG.11454	MSTRG.11454.1
MSTRG.11455	MSTRG.11455.1
MSTRG.11461	MSTRG.11461.1
MSTRG.11469	MSTRG.11469.1
MSTRG.11473	MSTRG.11473.1
MSTRG.11476	MSTRG.11476.1
MSTRG.11479	MSTRG.11479.1
MSTRG.11482	MSTRG.11482.1
MSTRG.1149	MSTRG.1149.1
MSTRG.115	MSTRG.115.1
MSTRG.11502	MSTRG.11502.1
MSTRG.11503	MSTRG.11503.1
MSTRG.11506	MSTRG.11506.1
MSTRG.1151	MSTRG.1151.1
MSTRG.11529	MSTRG.11529.1
MSTRG.1153	MSTRG.1153.1
MSTRG.11530	MSTRG.11530.1
MSTRG.1155	MSTRG.1155.1
MSTRG.11572	MSTRG.11572.1
MSTRG.11580	MSTRG.11580.1
MSTRG.11586	MSTRG.11586.1
MSTRG.11606	MSTRG.11606.1
MSTRG.11617	MSTRG.11617.1;MSTRG.11617.2
MSTRG.11631	MSTRG.11631.1
MSTRG.11634	MSTRG.11634.1
MSTRG.11637	MSTRG.11637.1
MSTRG.11640	MSTRG.11640.1
MSTRG.11643	MSTRG.11643.1
MSTRG.11646	MSTRG.11646.1
MSTRG.11648	MSTRG.11648.1
MSTRG.11652	MSTRG.11652.1
MSTRG.11657	MSTRG.11657.1
MSTRG.1166	MSTRG.1166.1
MSTRG.11664	MSTRG.11664.1;MSTRG.11664.2
MSTRG.11665	MSTRG.11665.1
MSTRG.11668	MSTRG.11668.1
MSTRG.11670	MSTRG.11670.1
MSTRG.11671	MSTRG.11671.1
MSTRG.11673	MSTRG.11673.1
MSTRG.11676	MSTRG.11676.1
MSTRG.11681	MSTRG.11681.1
MSTRG.11687	MSTRG.11687.1
MSTRG.11691	MSTRG.11691.1
MSTRG.11696	MSTRG.11696.1
MSTRG.11701	MSTRG.11701.1
MSTRG.11704	MSTRG.11704.1
MSTRG.11707	MSTRG.11707.1
MSTRG.11711	MSTRG.11711.1;MSTRG.11711.2
MSTRG.11714	MSTRG.11714.1
MSTRG.11715	MSTRG.11715.1
MSTRG.11720	MSTRG.11720.1
MSTRG.11724	MSTRG.11724.1
MSTRG.11729	MSTRG.11729.1;MSTRG.11729.2
MSTRG.11732	MSTRG.11732.1
MSTRG.11740	MSTRG.11740.1;MSTRG.11740.2
MSTRG.11741	MSTRG.11741.1
MSTRG.11745	MSTRG.11745.1
MSTRG.11749	MSTRG.11749.1
MSTRG.11750	MSTRG.11750.1
MSTRG.11759	MSTRG.11759.1
MSTRG.11761	MSTRG.11761.1;MSTRG.11761.2
MSTRG.11779	MSTRG.11779.1
MSTRG.11782	MSTRG.11782.1
MSTRG.11784	MSTRG.11784.1
MSTRG.11799	MSTRG.11799.1
MSTRG.118	MSTRG.118.1
MSTRG.11801	MSTRG.11801.1
MSTRG.11817	MSTRG.11817.1
MSTRG.11820	MSTRG.11820.1
MSTRG.11823	MSTRG.11823.1
MSTRG.1183	MSTRG.1183.1;MSTRG.1183.2
MSTRG.11830	MSTRG.11830.1;MSTRG.11830.2
MSTRG.11833	MSTRG.11833.1
MSTRG.11836	MSTRG.11836.1;MSTRG.11836.2
MSTRG.11838	MSTRG.11838.1
MSTRG.11841	MSTRG.11841.1
MSTRG.11843	MSTRG.11843.1
MSTRG.11855	MSTRG.11855.1
MSTRG.11858	MSTRG.11858.1
MSTRG.1187	MSTRG.1187.1
MSTRG.11870	MSTRG.11870.1;MSTRG.11870.2
MSTRG.11871	MSTRG.11871.1
MSTRG.11883	MSTRG.11883.1
MSTRG.11886	MSTRG.11886.1
MSTRG.11896	MSTRG.11896.1
MSTRG.11899	MSTRG.11899.1
MSTRG.11901	MSTRG.11901.1
MSTRG.11902	MSTRG.11902.1
MSTRG.11903	MSTRG.11903.1
MSTRG.11905	MSTRG.11905.1
MSTRG.11909	MSTRG.11909.1
MSTRG.11912	MSTRG.11912.1
MSTRG.11914	MSTRG.11914.1
MSTRG.11921	MSTRG.11921.1
MSTRG.11926	MSTRG.11926.1
MSTRG.11931	MSTRG.11931.1;MSTRG.11931.2
MSTRG.11933	MSTRG.11933.1
MSTRG.11934	MSTRG.11934.1
MSTRG.11937	MSTRG.11937.1
MSTRG.1194	MSTRG.1194.1
MSTRG.1195	MSTRG.1195.1
MSTRG.11957	MSTRG.11957.1
MSTRG.11964	MSTRG.11964.1
MSTRG.11967	MSTRG.11967.1
MSTRG.11977	MSTRG.11977.1
MSTRG.11980	MSTRG.11980.1
MSTRG.11985	MSTRG.11985.1
MSTRG.11987	MSTRG.11987.1
MSTRG.11991	MSTRG.11991.1
MSTRG.11994	MSTRG.11994.1;MSTRG.11994.2
MSTRG.11995	MSTRG.11995.1
MSTRG.11996	MSTRG.11996.1
MSTRG.11997	MSTRG.11997.1
MSTRG.11999	MSTRG.11999.1
MSTRG.12003	MSTRG.12003.1
MSTRG.12007	MSTRG.12007.1
MSTRG.12008	MSTRG.12008.1
MSTRG.1201	MSTRG.1201.1
MSTRG.12011	MSTRG.12011.1
MSTRG.12028	MSTRG.12028.1
MSTRG.12029	MSTRG.12029.1
MSTRG.12030	MSTRG.12030.1
MSTRG.12035	MSTRG.12035.1;MSTRG.12035.2
MSTRG.12040	MSTRG.12040.1
MSTRG.12045	MSTRG.12045.1
MSTRG.12048	MSTRG.12048.1
MSTRG.12051	MSTRG.12051.1
MSTRG.12055	MSTRG.12055.1
MSTRG.12056	MSTRG.12056.1
MSTRG.12065	MSTRG.12065.1
MSTRG.12070	MSTRG.12070.1;MSTRG.12070.2;MSTRG.12070.3
MSTRG.12078	MSTRG.12078.1
MSTRG.12081	MSTRG.12081.1
MSTRG.12086	MSTRG.12086.1;MSTRG.12086.2
MSTRG.12090	MSTRG.12090.1;MSTRG.12090.2
MSTRG.12091	MSTRG.12091.1
MSTRG.12093	MSTRG.12093.1
MSTRG.12094	MSTRG.12094.1
MSTRG.12106	MSTRG.12106.1
MSTRG.12108	MSTRG.12108.1;MSTRG.12108.2
MSTRG.1211	MSTRG.1211.1
MSTRG.12110	MSTRG.12110.1
MSTRG.12112	MSTRG.12112.1
MSTRG.12128	MSTRG.12128.1
MSTRG.12136	MSTRG.12136.1
MSTRG.12139	MSTRG.12139.1
MSTRG.12145	MSTRG.12145.1
MSTRG.12146	MSTRG.12146.1
MSTRG.12150	MSTRG.12150.1
MSTRG.12151	MSTRG.12151.1
MSTRG.12153	MSTRG.12153.1
MSTRG.12156	MSTRG.12156.1
MSTRG.12161	MSTRG.12161.1
MSTRG.12165	MSTRG.12165.1
MSTRG.12168	MSTRG.12168.1
MSTRG.12169	MSTRG.12169.1
MSTRG.12184	MSTRG.12184.1
MSTRG.12185	MSTRG.12185.1
MSTRG.12186	MSTRG.12186.1
MSTRG.12190	MSTRG.12190.1
MSTRG.12193	MSTRG.12193.1
MSTRG.12199	MSTRG.12199.1
MSTRG.12205	MSTRG.12205.1
MSTRG.1221	MSTRG.1221.1
MSTRG.12211	MSTRG.12211.1
MSTRG.12213	MSTRG.12213.1
MSTRG.12215	MSTRG.12215.1
MSTRG.12216	MSTRG.12216.1
MSTRG.1222	MSTRG.1222.1
MSTRG.12222	MSTRG.12222.1
MSTRG.12227	MSTRG.12227.1
MSTRG.12228	MSTRG.12228.1
MSTRG.12235	MSTRG.12235.1
MSTRG.12237	MSTRG.12237.1
MSTRG.1224	MSTRG.1224.1
MSTRG.12245	MSTRG.12245.1
MSTRG.12249	MSTRG.12249.1
MSTRG.1225	MSTRG.1225.1
MSTRG.12251	MSTRG.12251.1
MSTRG.12261	MSTRG.12261.1
MSTRG.12264	MSTRG.12264.1
MSTRG.12273	MSTRG.12273.1
MSTRG.12275	MSTRG.12275.1
MSTRG.12288	MSTRG.12288.1
MSTRG.12292	MSTRG.12292.1
MSTRG.12294	MSTRG.12294.1
MSTRG.12295	MSTRG.12295.1
MSTRG.12296	MSTRG.12296.1
MSTRG.12305	MSTRG.12305.1
MSTRG.12308	MSTRG.12308.1
MSTRG.12309	MSTRG.12309.1
MSTRG.12317	MSTRG.12317.1
MSTRG.1232	MSTRG.1232.1
MSTRG.12323	MSTRG.12323.1
MSTRG.12326	MSTRG.12326.1
MSTRG.12328	MSTRG.12328.1
MSTRG.12337	MSTRG.12337.1
MSTRG.12341	MSTRG.12341.1
MSTRG.12346	MSTRG.12346.1
MSTRG.12351	MSTRG.12351.1
MSTRG.12352	MSTRG.12352.1
MSTRG.12353	MSTRG.12353.1
MSTRG.12354	MSTRG.12354.1
MSTRG.12356	MSTRG.12356.1;MSTRG.12356.2
MSTRG.12362	MSTRG.12362.1
MSTRG.12363	MSTRG.12363.1
MSTRG.12364	MSTRG.12364.1
MSTRG.1238	MSTRG.1238.1
MSTRG.12381	MSTRG.12381.1
MSTRG.12387	MSTRG.12387.1
MSTRG.12388	MSTRG.12388.1
MSTRG.12398	MSTRG.12398.1;MSTRG.12398.2
MSTRG.12400	MSTRG.12400.1
MSTRG.12402	MSTRG.12402.1
MSTRG.12407	MSTRG.12407.1
MSTRG.12418	MSTRG.12418.1
MSTRG.12422	MSTRG.12422.1
MSTRG.12425	MSTRG.12425.1
MSTRG.12429	MSTRG.12429.1
MSTRG.12436	MSTRG.12436.1
MSTRG.12437	MSTRG.12437.1
MSTRG.1245	MSTRG.1245.1
MSTRG.12452	MSTRG.12452.1
MSTRG.12459	MSTRG.12459.1
MSTRG.1246	MSTRG.1246.1
MSTRG.12460	MSTRG.12460.1;MSTRG.12460.2
MSTRG.12464	MSTRG.12464.1
MSTRG.12468	MSTRG.12468.1
MSTRG.12470	MSTRG.12470.1
MSTRG.12471	MSTRG.12471.1
MSTRG.12478	MSTRG.12478.1
MSTRG.1248	MSTRG.1248.1
MSTRG.12483	MSTRG.12483.1
MSTRG.12484	MSTRG.12484.1
MSTRG.12489	MSTRG.12489.1;MSTRG.12489.2
MSTRG.12492	MSTRG.12492.1
MSTRG.12498	MSTRG.12498.1
MSTRG.12500	MSTRG.12500.1
MSTRG.12505	MSTRG.12505.1
MSTRG.12506	MSTRG.12506.1
MSTRG.12507	MSTRG.12507.1;MSTRG.12507.2
MSTRG.12508	MSTRG.12508.1
MSTRG.12512	MSTRG.12512.1
MSTRG.12517	MSTRG.12517.1
MSTRG.12526	MSTRG.12526.1
MSTRG.12531	MSTRG.12531.1
MSTRG.12542	MSTRG.12542.1
MSTRG.12553	MSTRG.12553.1
MSTRG.12558	MSTRG.12558.1
MSTRG.12562	MSTRG.12562.1
MSTRG.12565	MSTRG.12565.1
MSTRG.12568	MSTRG.12568.1
MSTRG.12571	MSTRG.12571.1
MSTRG.12573	MSTRG.12573.1
MSTRG.12574	MSTRG.12574.1
MSTRG.12575	MSTRG.12575.1;MSTRG.12575.2
MSTRG.12576	MSTRG.12576.1
MSTRG.1258	MSTRG.1258.1
MSTRG.12588	MSTRG.12588.1
MSTRG.12593	MSTRG.12593.1
MSTRG.12598	MSTRG.12598.1
MSTRG.12601	MSTRG.12601.1
MSTRG.12604	MSTRG.12604.1
MSTRG.12607	MSTRG.12607.1;MSTRG.12607.2
MSTRG.12612	MSTRG.12612.1
MSTRG.12618	MSTRG.12618.1
MSTRG.12619	MSTRG.12619.1
MSTRG.12623	MSTRG.12623.1
MSTRG.12625	MSTRG.12625.1
MSTRG.12636	MSTRG.12636.1
MSTRG.12637	MSTRG.12637.1
MSTRG.12639	MSTRG.12639.1;MSTRG.12639.2
MSTRG.12647	MSTRG.12647.1
MSTRG.1265	MSTRG.1265.1
MSTRG.12650	MSTRG.12650.1
MSTRG.12659	MSTRG.12659.1
MSTRG.12664	MSTRG.12664.1
MSTRG.12667	MSTRG.12667.1
MSTRG.12671	MSTRG.12671.1;MSTRG.12671.2
MSTRG.12675	MSTRG.12675.1
MSTRG.12679	MSTRG.12679.1
MSTRG.12682	MSTRG.12682.1
MSTRG.12684	MSTRG.12684.1
MSTRG.12690	MSTRG.12690.1
MSTRG.12696	MSTRG.12696.1
MSTRG.12697	MSTRG.12697.1
MSTRG.12703	MSTRG.12703.1
MSTRG.12705	MSTRG.12705.1
MSTRG.12708	MSTRG.12708.1
MSTRG.12709	MSTRG.12709.1
MSTRG.12710	MSTRG.12710.1;MSTRG.12710.2
MSTRG.12713	MSTRG.12713.1
MSTRG.12715	MSTRG.12715.1
MSTRG.12718	MSTRG.12718.1
MSTRG.12725	MSTRG.12725.1
MSTRG.12727	MSTRG.12727.1
MSTRG.12728	MSTRG.12728.1
MSTRG.12729	MSTRG.12729.1
MSTRG.12738	MSTRG.12738.1
MSTRG.12741	MSTRG.12741.1
MSTRG.12742	MSTRG.12742.1
MSTRG.12744	MSTRG.12744.1
MSTRG.12745	MSTRG.12745.1;MSTRG.12745.2;MSTRG.12745.3
MSTRG.12751	MSTRG.12751.1
MSTRG.12759	MSTRG.12759.1
MSTRG.12768	MSTRG.12768.1
MSTRG.12774	MSTRG.12774.1
MSTRG.12779	MSTRG.12779.1
MSTRG.1278	MSTRG.1278.1
MSTRG.12783	MSTRG.12783.1
MSTRG.12784	MSTRG.12784.1
MSTRG.12793	MSTRG.12793.1
MSTRG.12798	MSTRG.12798.1;MSTRG.12798.2
MSTRG.12802	MSTRG.12802.1
MSTRG.12805	MSTRG.12805.1
MSTRG.12809	MSTRG.12809.1
MSTRG.1281	MSTRG.1281.1
MSTRG.12811	MSTRG.12811.1
MSTRG.12813	MSTRG.12813.1
MSTRG.12814	MSTRG.12814.1
MSTRG.12819	MSTRG.12819.1
MSTRG.12824	MSTRG.12824.1
MSTRG.12827	MSTRG.12827.1
MSTRG.12829	MSTRG.12829.1
MSTRG.12832	MSTRG.12832.1
MSTRG.12837	MSTRG.12837.1
MSTRG.12840	MSTRG.12840.1
MSTRG.12844	MSTRG.12844.1
MSTRG.12850	MSTRG.12850.1
MSTRG.12861	MSTRG.12861.1
MSTRG.12862	MSTRG.12862.1
MSTRG.12863	MSTRG.12863.1
MSTRG.12865	MSTRG.12865.1
MSTRG.12869	MSTRG.12869.1
MSTRG.12871	MSTRG.12871.1
MSTRG.1288	MSTRG.1288.1
MSTRG.12880	MSTRG.12880.1
MSTRG.12883	MSTRG.12883.1
MSTRG.12887	MSTRG.12887.1
MSTRG.12891	MSTRG.12891.1
MSTRG.12894	MSTRG.12894.1
MSTRG.12895	MSTRG.12895.1
MSTRG.12898	MSTRG.12898.1
MSTRG.1290	MSTRG.1290.1
MSTRG.12901	MSTRG.12901.1
MSTRG.12904	MSTRG.12904.1
MSTRG.12906	MSTRG.12906.1
MSTRG.12907	MSTRG.12907.1
MSTRG.12908	MSTRG.12908.1
MSTRG.12910	MSTRG.12910.1
MSTRG.12914	MSTRG.12914.1
MSTRG.12918	MSTRG.12918.1
MSTRG.12919	MSTRG.12919.1
MSTRG.12920	MSTRG.12920.1
MSTRG.12922	MSTRG.12922.1
MSTRG.12924	MSTRG.12924.1
MSTRG.12927	MSTRG.12927.1
MSTRG.12928	MSTRG.12928.1
MSTRG.12939	MSTRG.12939.1
MSTRG.12943	MSTRG.12943.1
MSTRG.12944	MSTRG.12944.1
MSTRG.12946	MSTRG.12946.1
MSTRG.12948	MSTRG.12948.1
MSTRG.12951	MSTRG.12951.1
MSTRG.12953	MSTRG.12953.1
MSTRG.12956	MSTRG.12956.1
MSTRG.12957	MSTRG.12957.1
MSTRG.12962	MSTRG.12962.1
MSTRG.12964	MSTRG.12964.1
MSTRG.12966	MSTRG.12966.1
MSTRG.12967	MSTRG.12967.1
MSTRG.12971	MSTRG.12971.1
MSTRG.12977	MSTRG.12977.1
MSTRG.12978	MSTRG.12978.1
MSTRG.12979	MSTRG.12979.1
MSTRG.1298	MSTRG.1298.1
MSTRG.12981	MSTRG.12981.1
MSTRG.12983	MSTRG.12983.1
MSTRG.12985	MSTRG.12985.1
MSTRG.12986	MSTRG.12986.1
MSTRG.12988	MSTRG.12988.1
MSTRG.12989	MSTRG.12989.1
MSTRG.12990	MSTRG.12990.1
MSTRG.12994	MSTRG.12994.1
MSTRG.12997	MSTRG.12997.1
MSTRG.13003	MSTRG.13003.1
MSTRG.13004	MSTRG.13004.1
MSTRG.1301	MSTRG.1301.1
MSTRG.13010	MSTRG.13010.1
MSTRG.13012	MSTRG.13012.1
MSTRG.13023	MSTRG.13023.1
MSTRG.13024	MSTRG.13024.1
MSTRG.13029	MSTRG.13029.1
MSTRG.13030	MSTRG.13030.1
MSTRG.13034	MSTRG.13034.1
MSTRG.13036	MSTRG.13036.1
MSTRG.13045	MSTRG.13045.1
MSTRG.13046	MSTRG.13046.1
MSTRG.13048	MSTRG.13048.1
MSTRG.13049	MSTRG.13049.1
MSTRG.13050	MSTRG.13050.1
MSTRG.13055	MSTRG.13055.1;MSTRG.13055.2
MSTRG.13056	MSTRG.13056.1
MSTRG.13057	MSTRG.13057.1
MSTRG.13058	MSTRG.13058.1
MSTRG.13061	MSTRG.13061.1
MSTRG.13062	MSTRG.13062.1
MSTRG.13065	MSTRG.13065.1
MSTRG.13066	MSTRG.13066.1
MSTRG.13072	MSTRG.13072.1
MSTRG.13079	MSTRG.13079.1
MSTRG.13085	MSTRG.13085.1
MSTRG.1310	MSTRG.1310.1
MSTRG.1311	MSTRG.1311.1
MSTRG.1335	MSTRG.1335.1
MSTRG.1346	MSTRG.1346.1
MSTRG.1349	MSTRG.1349.1
MSTRG.1356	MSTRG.1356.1
MSTRG.1374	MSTRG.1374.1
MSTRG.1388	MSTRG.1388.1
MSTRG.139	MSTRG.139.1
MSTRG.1393	MSTRG.1393.1
MSTRG.1401	MSTRG.1401.1;MSTRG.1401.2
MSTRG.1409	MSTRG.1409.1
MSTRG.1410	MSTRG.1410.1
MSTRG.1421	MSTRG.1421.1
MSTRG.1423	MSTRG.1423.1
MSTRG.1425	MSTRG.1425.1
MSTRG.1429	MSTRG.1429.1
MSTRG.1439	MSTRG.1439.1
MSTRG.1443	MSTRG.1443.1
MSTRG.1458	MSTRG.1458.1
MSTRG.1466	MSTRG.1466.1
MSTRG.1469	MSTRG.1469.1
MSTRG.1470	MSTRG.1470.1
MSTRG.148	MSTRG.148.1
MSTRG.1480	MSTRG.1480.1
MSTRG.1483	MSTRG.1483.1
MSTRG.1488	MSTRG.1488.1
MSTRG.1499	MSTRG.1499.1
MSTRG.150	MSTRG.150.1
MSTRG.1515	MSTRG.1515.1;MSTRG.1515.2
MSTRG.1516	MSTRG.1516.1
MSTRG.1519	MSTRG.1519.1;MSTRG.1519.2
MSTRG.152	MSTRG.152.1;MSTRG.152.2
MSTRG.1525	MSTRG.1525.1;MSTRG.1525.2
MSTRG.1526	MSTRG.1526.1
MSTRG.153	MSTRG.153.1
MSTRG.1530	MSTRG.1530.1
MSTRG.1536	MSTRG.1536.1
MSTRG.1538	MSTRG.1538.1
MSTRG.155	MSTRG.155.1
MSTRG.1569	MSTRG.1569.1
MSTRG.1573	MSTRG.1573.1
MSTRG.1578	MSTRG.1578.1
MSTRG.1583	MSTRG.1583.1
MSTRG.1590	MSTRG.1590.1
MSTRG.1627	MSTRG.1627.1
MSTRG.1630	MSTRG.1630.1
MSTRG.1631	MSTRG.1631.1
MSTRG.1635	MSTRG.1635.1
MSTRG.1636	MSTRG.1636.1
MSTRG.1638	MSTRG.1638.1
MSTRG.1646	MSTRG.1646.1
MSTRG.1648	MSTRG.1648.1
MSTRG.1654	MSTRG.1654.1
MSTRG.1655	MSTRG.1655.1
MSTRG.1658	MSTRG.1658.1
MSTRG.1659	MSTRG.1659.1
MSTRG.166	MSTRG.166.1
MSTRG.1664	MSTRG.1664.1
MSTRG.1665	MSTRG.1665.1
MSTRG.1666	MSTRG.1666.1
MSTRG.1672	MSTRG.1672.1
MSTRG.1676	MSTRG.1676.1
MSTRG.1684	MSTRG.1684.1
MSTRG.1688	MSTRG.1688.1
MSTRG.1692	MSTRG.1692.1
MSTRG.1693	MSTRG.1693.1
MSTRG.1695	MSTRG.1695.1
MSTRG.1701	MSTRG.1701.1
MSTRG.1712	MSTRG.1712.1
MSTRG.1713	MSTRG.1713.1;MSTRG.1713.2
MSTRG.1715	MSTRG.1715.1
MSTRG.1716	MSTRG.1716.1
MSTRG.172	MSTRG.172.1
MSTRG.1724	MSTRG.1724.1
MSTRG.1726	MSTRG.1726.1
MSTRG.1733	MSTRG.1733.1
MSTRG.1750	MSTRG.1750.1
MSTRG.1753	MSTRG.1753.1
MSTRG.1757	MSTRG.1757.1
MSTRG.1762	MSTRG.1762.1
MSTRG.1766	MSTRG.1766.1
MSTRG.1772	MSTRG.1772.1
MSTRG.1786	MSTRG.1786.1
MSTRG.1799	MSTRG.1799.1
MSTRG.1822	MSTRG.1822.1
MSTRG.1826	MSTRG.1826.1
MSTRG.1829	MSTRG.1829.1
MSTRG.1833	MSTRG.1833.1
MSTRG.1836	MSTRG.1836.1;MSTRG.1836.2
MSTRG.1846	MSTRG.1846.1
MSTRG.1857	MSTRG.1857.1
MSTRG.1866	MSTRG.1866.1
MSTRG.1882	MSTRG.1882.1
MSTRG.1884	MSTRG.1884.1
MSTRG.1892	MSTRG.1892.1
MSTRG.1895	MSTRG.1895.1
MSTRG.1898	MSTRG.1898.1
MSTRG.1899	MSTRG.1899.1
MSTRG.1907	MSTRG.1907.1
MSTRG.1908	MSTRG.1908.1
MSTRG.1912	MSTRG.1912.1
MSTRG.192	MSTRG.192.1
MSTRG.1924	MSTRG.1924.1
MSTRG.1939	MSTRG.1939.1
MSTRG.194	MSTRG.194.1
MSTRG.1944	MSTRG.1944.1
MSTRG.1947	MSTRG.1947.1
MSTRG.197	MSTRG.197.1
MSTRG.1975	MSTRG.1975.1
MSTRG.1979	MSTRG.1979.1
MSTRG.1987	MSTRG.1987.1
MSTRG.1999	MSTRG.1999.1
MSTRG.2009	MSTRG.2009.1;MSTRG.2009.2
MSTRG.2012	MSTRG.2012.1
MSTRG.2020	MSTRG.2020.1
MSTRG.2022	MSTRG.2022.1
MSTRG.2023	MSTRG.2023.1
MSTRG.2032	MSTRG.2032.1
MSTRG.2035	MSTRG.2035.1
MSTRG.2036	MSTRG.2036.1
MSTRG.2043	MSTRG.2043.1
MSTRG.2056	MSTRG.2056.1
MSTRG.206	MSTRG.206.1
MSTRG.2061	MSTRG.2061.1
MSTRG.2068	MSTRG.2068.1
MSTRG.2095	MSTRG.2095.1
MSTRG.2097	MSTRG.2097.1
MSTRG.21	MSTRG.21.1
MSTRG.210	MSTRG.210.1
MSTRG.2100	MSTRG.2100.1
MSTRG.2111	MSTRG.2111.1
MSTRG.2114	MSTRG.2114.1
MSTRG.2115	MSTRG.2115.1
MSTRG.2127	MSTRG.2127.1;MSTRG.2127.2
MSTRG.213	MSTRG.213.1
MSTRG.2134	MSTRG.2134.1
MSTRG.2146	MSTRG.2146.1
MSTRG.2148	MSTRG.2148.1
MSTRG.2160	MSTRG.2160.1;MSTRG.2160.2
MSTRG.2174	MSTRG.2174.1
MSTRG.2177	MSTRG.2177.1
MSTRG.2178	MSTRG.2178.1
MSTRG.218	MSTRG.218.1
MSTRG.2189	MSTRG.2189.1
MSTRG.2192	MSTRG.2192.1
MSTRG.2193	MSTRG.2193.1
MSTRG.2196	MSTRG.2196.1
MSTRG.2199	MSTRG.2199.1
MSTRG.220	MSTRG.220.1
MSTRG.2202	MSTRG.2202.1
MSTRG.2203	MSTRG.2203.1
MSTRG.2204	MSTRG.2204.1
MSTRG.2205	MSTRG.2205.1
MSTRG.2209	MSTRG.2209.1
MSTRG.2213	MSTRG.2213.1
MSTRG.2214	MSTRG.2214.1;MSTRG.2214.2
MSTRG.2217	MSTRG.2217.1
MSTRG.2219	MSTRG.2219.1
MSTRG.2220	MSTRG.2220.1
MSTRG.2224	MSTRG.2224.1
MSTRG.2228	MSTRG.2228.1
MSTRG.2238	MSTRG.2238.1
MSTRG.2239	MSTRG.2239.1
MSTRG.224	MSTRG.224.1
MSTRG.2246	MSTRG.2246.1
MSTRG.2258	MSTRG.2258.1
MSTRG.2262	MSTRG.2262.1
MSTRG.2266	MSTRG.2266.1
MSTRG.2275	MSTRG.2275.1
MSTRG.2284	MSTRG.2284.1
MSTRG.2295	MSTRG.2295.1
MSTRG.2305	MSTRG.2305.1
MSTRG.2306	MSTRG.2306.1
MSTRG.2313	MSTRG.2313.1
MSTRG.2315	MSTRG.2315.1
MSTRG.2316	MSTRG.2316.1
MSTRG.2326	MSTRG.2326.1
MSTRG.2328	MSTRG.2328.1
MSTRG.2329	MSTRG.2329.1
MSTRG.2332	MSTRG.2332.1
MSTRG.2335	MSTRG.2335.1
MSTRG.2338	MSTRG.2338.1
MSTRG.2350	MSTRG.2350.1
MSTRG.2357	MSTRG.2357.1
MSTRG.2359	MSTRG.2359.1
MSTRG.2361	MSTRG.2361.1
MSTRG.2362	MSTRG.2362.1
MSTRG.2375	MSTRG.2375.1
MSTRG.2376	MSTRG.2376.1
MSTRG.2385	MSTRG.2385.1
MSTRG.2386	MSTRG.2386.1
MSTRG.2389	MSTRG.2389.1
MSTRG.2393	MSTRG.2393.1
MSTRG.2400	MSTRG.2400.1;MSTRG.2400.2
MSTRG.2409	MSTRG.2409.1
MSTRG.2413	MSTRG.2413.1
MSTRG.2422	MSTRG.2422.1
MSTRG.2429	MSTRG.2429.1
MSTRG.2430	MSTRG.2430.1;MSTRG.2430.2
MSTRG.2435	MSTRG.2435.1
MSTRG.2436	MSTRG.2436.1
MSTRG.244	MSTRG.244.1
MSTRG.2441	MSTRG.2441.1
MSTRG.2451	MSTRG.2451.1
MSTRG.2461	MSTRG.2461.1
MSTRG.247	MSTRG.247.1;MSTRG.247.2
MSTRG.2470	MSTRG.2470.1
MSTRG.2471	MSTRG.2471.1
MSTRG.2472	MSTRG.2472.1
MSTRG.2474	MSTRG.2474.1
MSTRG.2476	MSTRG.2476.1
MSTRG.2478	MSTRG.2478.1
MSTRG.2487	MSTRG.2487.1
MSTRG.249	MSTRG.249.1
MSTRG.2492	MSTRG.2492.1
MSTRG.2498	MSTRG.2498.1
MSTRG.25	MSTRG.25.1
MSTRG.2512	MSTRG.2512.1
MSTRG.2525	MSTRG.2525.1;MSTRG.2525.2
MSTRG.2527	MSTRG.2527.1
MSTRG.2529	MSTRG.2529.1
MSTRG.2531	MSTRG.2531.1
MSTRG.2539	MSTRG.2539.1
MSTRG.2543	MSTRG.2543.1
MSTRG.2547	MSTRG.2547.1
MSTRG.2548	MSTRG.2548.1
MSTRG.2553	MSTRG.2553.1
MSTRG.2554	MSTRG.2554.1
MSTRG.2557	MSTRG.2557.1
MSTRG.2560	MSTRG.2560.1
MSTRG.2566	MSTRG.2566.1
MSTRG.2579	MSTRG.2579.1
MSTRG.2583	MSTRG.2583.1
MSTRG.2585	MSTRG.2585.1
MSTRG.2586	MSTRG.2586.1;MSTRG.2586.2
MSTRG.2591	MSTRG.2591.1
MSTRG.2598	MSTRG.2598.1
MSTRG.2601	MSTRG.2601.1
MSTRG.2602	MSTRG.2602.1
MSTRG.2614	MSTRG.2614.1
MSTRG.2617	MSTRG.2617.1
MSTRG.2621	MSTRG.2621.1;MSTRG.2621.2
MSTRG.2626	MSTRG.2626.1
MSTRG.2628	MSTRG.2628.1
MSTRG.2636	MSTRG.2636.1
MSTRG.2640	MSTRG.2640.1;MSTRG.2640.2
MSTRG.2642	MSTRG.2642.1
MSTRG.2644	MSTRG.2644.1
MSTRG.2645	MSTRG.2645.1
MSTRG.2648	MSTRG.2648.1
MSTRG.265	MSTRG.265.1
MSTRG.2650	MSTRG.2650.1
MSTRG.2652	MSTRG.2652.1
MSTRG.2665	MSTRG.2665.1
MSTRG.2668	MSTRG.2668.1
MSTRG.2672	MSTRG.2672.1
MSTRG.2673	MSTRG.2673.1
MSTRG.2674	MSTRG.2674.1
MSTRG.2677	MSTRG.2677.1
MSTRG.2680	MSTRG.2680.1
MSTRG.269	MSTRG.269.1
MSTRG.2693	MSTRG.2693.1;MSTRG.2693.2
MSTRG.270	MSTRG.270.1
MSTRG.2700	MSTRG.2700.1
MSTRG.2704	MSTRG.2704.1
MSTRG.2705	MSTRG.2705.1
MSTRG.2710	MSTRG.2710.1
MSTRG.2715	MSTRG.2715.1
MSTRG.2722	MSTRG.2722.1;MSTRG.2722.2
MSTRG.2724	MSTRG.2724.1
MSTRG.2726	MSTRG.2726.1
MSTRG.273	MSTRG.273.1
MSTRG.2731	MSTRG.2731.1;MSTRG.2731.2
MSTRG.2736	MSTRG.2736.1
MSTRG.2737	MSTRG.2737.1
MSTRG.274	MSTRG.274.1
MSTRG.2740	MSTRG.2740.1
MSTRG.2746	MSTRG.2746.1
MSTRG.2754	MSTRG.2754.1
MSTRG.2755	MSTRG.2755.1
MSTRG.2757	MSTRG.2757.1
MSTRG.276	MSTRG.276.1
MSTRG.2767	MSTRG.2767.1
MSTRG.2768	MSTRG.2768.1
MSTRG.2775	MSTRG.2775.1
MSTRG.2776	MSTRG.2776.1
MSTRG.2783	MSTRG.2783.1
MSTRG.2795	MSTRG.2795.1
MSTRG.2797	MSTRG.2797.1
MSTRG.2800	MSTRG.2800.1
MSTRG.2801	MSTRG.2801.1
MSTRG.2804	MSTRG.2804.1
MSTRG.2806	MSTRG.2806.1;MSTRG.2806.2
MSTRG.2815	MSTRG.2815.1
MSTRG.2816	MSTRG.2816.1
MSTRG.2821	MSTRG.2821.1
MSTRG.2825	MSTRG.2825.1
MSTRG.2827	MSTRG.2827.1
MSTRG.2828	MSTRG.2828.1
MSTRG.2832	MSTRG.2832.1
MSTRG.2834	MSTRG.2834.1
MSTRG.2837	MSTRG.2837.1
MSTRG.2842	MSTRG.2842.1
MSTRG.2849	MSTRG.2849.1
MSTRG.2851	MSTRG.2851.1
MSTRG.2852	MSTRG.2852.1
MSTRG.2855	MSTRG.2855.1
MSTRG.2859	MSTRG.2859.1
MSTRG.2862	MSTRG.2862.1
MSTRG.2864	MSTRG.2864.1
MSTRG.2867	MSTRG.2867.1
MSTRG.2873	MSTRG.2873.1
MSTRG.2876	MSTRG.2876.1
MSTRG.2885	MSTRG.2885.1
MSTRG.289	MSTRG.289.1
MSTRG.29	MSTRG.29.1
MSTRG.2907	MSTRG.2907.1
MSTRG.2908	MSTRG.2908.1;MSTRG.2908.2
MSTRG.291	MSTRG.291.1
MSTRG.2912	MSTRG.2912.1
MSTRG.2916	MSTRG.2916.1
MSTRG.2920	MSTRG.2920.1
MSTRG.2923	MSTRG.2923.1
MSTRG.2924	MSTRG.2924.1
MSTRG.2927	MSTRG.2927.1
MSTRG.2936	MSTRG.2936.1
MSTRG.2940	MSTRG.2940.1
MSTRG.2944	MSTRG.2944.1
MSTRG.2946	MSTRG.2946.1
MSTRG.2947	MSTRG.2947.1
MSTRG.2955	MSTRG.2955.1
MSTRG.2956	MSTRG.2956.1
MSTRG.2960	MSTRG.2960.1
MSTRG.2965	MSTRG.2965.1
MSTRG.2968	MSTRG.2968.1
MSTRG.2969	MSTRG.2969.1;MSTRG.2969.2
MSTRG.2976	MSTRG.2976.1
MSTRG.2979	MSTRG.2979.1
MSTRG.2981	MSTRG.2981.1
MSTRG.2987	MSTRG.2987.1
MSTRG.299	MSTRG.299.1
MSTRG.3002	MSTRG.3002.1
MSTRG.3004	MSTRG.3004.1
MSTRG.3008	MSTRG.3008.1
MSTRG.3009	MSTRG.3009.1;MSTRG.3009.2
MSTRG.302	MSTRG.302.1
MSTRG.3020	MSTRG.3020.1
MSTRG.3021	MSTRG.3021.1
MSTRG.3025	MSTRG.3025.1
MSTRG.3026	MSTRG.3026.1
MSTRG.303	MSTRG.303.1
MSTRG.3032	MSTRG.3032.1
MSTRG.3040	MSTRG.3040.1
MSTRG.3041	MSTRG.3041.1
MSTRG.3043	MSTRG.3043.1
MSTRG.3048	MSTRG.3048.1
MSTRG.3065	MSTRG.3065.1
MSTRG.3068	MSTRG.3068.1;MSTRG.3068.2
MSTRG.3071	MSTRG.3071.1
MSTRG.3072	MSTRG.3072.1
MSTRG.3074	MSTRG.3074.1
MSTRG.3076	MSTRG.3076.1
MSTRG.3077	MSTRG.3077.1
MSTRG.3079	MSTRG.3079.1
MSTRG.3082	MSTRG.3082.1
MSTRG.3087	MSTRG.3087.1
MSTRG.3093	MSTRG.3093.1;MSTRG.3093.2
MSTRG.3098	MSTRG.3098.1
MSTRG.3101	MSTRG.3101.1
MSTRG.3104	MSTRG.3104.1
MSTRG.3109	MSTRG.3109.1
MSTRG.3114	MSTRG.3114.1
MSTRG.3120	MSTRG.3120.1
MSTRG.3121	MSTRG.3121.1
MSTRG.3130	MSTRG.3130.1
MSTRG.3132	MSTRG.3132.1
MSTRG.3140	MSTRG.3140.1;MSTRG.3140.2
MSTRG.3147	MSTRG.3147.1
MSTRG.3160	MSTRG.3160.1
MSTRG.3162	MSTRG.3162.1
MSTRG.3163	MSTRG.3163.1
MSTRG.3167	MSTRG.3167.1
MSTRG.3168	MSTRG.3168.1
MSTRG.3169	MSTRG.3169.1
MSTRG.3171	MSTRG.3171.1
MSTRG.3178	MSTRG.3178.1;MSTRG.3178.2
MSTRG.3184	MSTRG.3184.1
MSTRG.3187	MSTRG.3187.1
MSTRG.319	MSTRG.319.1
MSTRG.3191	MSTRG.3191.1
MSTRG.3192	MSTRG.3192.1;MSTRG.3192.2
MSTRG.320	MSTRG.320.1
MSTRG.3201	MSTRG.3201.1;MSTRG.3201.2
MSTRG.3212	MSTRG.3212.1
MSTRG.3214	MSTRG.3214.1
MSTRG.3216	MSTRG.3216.1
MSTRG.3220	MSTRG.3220.1
MSTRG.3222	MSTRG.3222.1
MSTRG.3225	MSTRG.3225.1
MSTRG.3229	MSTRG.3229.1
MSTRG.323	MSTRG.323.1
MSTRG.3236	MSTRG.3236.1
MSTRG.3242	MSTRG.3242.1
MSTRG.3245	MSTRG.3245.1
MSTRG.3251	MSTRG.3251.1
MSTRG.3258	MSTRG.3258.1
MSTRG.326	MSTRG.326.1
MSTRG.3271	MSTRG.3271.1
MSTRG.3276	MSTRG.3276.1
MSTRG.3283	MSTRG.3283.1
MSTRG.3287	MSTRG.3287.1
MSTRG.3299	MSTRG.3299.1
MSTRG.3306	MSTRG.3306.1;MSTRG.3306.2
MSTRG.3307	MSTRG.3307.1
MSTRG.3309	MSTRG.3309.1
MSTRG.3311	MSTRG.3311.1;MSTRG.3311.2
MSTRG.3312	MSTRG.3312.1
MSTRG.3315	MSTRG.3315.1
MSTRG.332	MSTRG.332.1
MSTRG.3322	MSTRG.3322.1
MSTRG.3327	MSTRG.3327.1
MSTRG.333	MSTRG.333.1
MSTRG.3333	MSTRG.3333.1;MSTRG.3333.2
MSTRG.3337	MSTRG.3337.1
MSTRG.3339	MSTRG.3339.1
MSTRG.334	MSTRG.334.1
MSTRG.3346	MSTRG.3346.1
MSTRG.3355	MSTRG.3355.1
MSTRG.3364	MSTRG.3364.1
MSTRG.3368	MSTRG.3368.1
MSTRG.3372	MSTRG.3372.1
MSTRG.3375	MSTRG.3375.1
MSTRG.3381	MSTRG.3381.1
MSTRG.3382	MSTRG.3382.1
MSTRG.3396	MSTRG.3396.1
MSTRG.3398	MSTRG.3398.1
MSTRG.340	MSTRG.340.1
MSTRG.3401	MSTRG.3401.1
MSTRG.3402	MSTRG.3402.1
MSTRG.3410	MSTRG.3410.1
MSTRG.3417	MSTRG.3417.1
MSTRG.3418	MSTRG.3418.1;MSTRG.3418.2;MSTRG.3418.3
MSTRG.3425	MSTRG.3425.1
MSTRG.3437	MSTRG.3437.1
MSTRG.3438	MSTRG.3438.1
MSTRG.3444	MSTRG.3444.1
MSTRG.3445	MSTRG.3445.1
MSTRG.3455	MSTRG.3455.1
MSTRG.3458	MSTRG.3458.1
MSTRG.3472	MSTRG.3472.1
MSTRG.3478	MSTRG.3478.1
MSTRG.3479	MSTRG.3479.1
MSTRG.3491	MSTRG.3491.1
MSTRG.3495	MSTRG.3495.1
MSTRG.350	MSTRG.350.1
MSTRG.3500	MSTRG.3500.1
MSTRG.351	MSTRG.351.1
MSTRG.3511	MSTRG.3511.1
MSTRG.3512	MSTRG.3512.1
MSTRG.3515	MSTRG.3515.1
MSTRG.3518	MSTRG.3518.1
MSTRG.3522	MSTRG.3522.1
MSTRG.3523	MSTRG.3523.1
MSTRG.3534	MSTRG.3534.1
MSTRG.3535	MSTRG.3535.1
MSTRG.3536	MSTRG.3536.1
MSTRG.3544	MSTRG.3544.1
MSTRG.3546	MSTRG.3546.1
MSTRG.3548	MSTRG.3548.1
MSTRG.356	MSTRG.356.1
MSTRG.3562	MSTRG.3562.1
MSTRG.3569	MSTRG.3569.1
MSTRG.3570	MSTRG.3570.1
MSTRG.3573	MSTRG.3573.1
MSTRG.3575	MSTRG.3575.1
MSTRG.3580	MSTRG.3580.1
MSTRG.3581	MSTRG.3581.1
MSTRG.3582	MSTRG.3582.1
MSTRG.3588	MSTRG.3588.1
MSTRG.3590	MSTRG.3590.1
MSTRG.3594	MSTRG.3594.1
MSTRG.3599	MSTRG.3599.1
MSTRG.360	MSTRG.360.1
MSTRG.3604	MSTRG.3604.1
MSTRG.3609	MSTRG.3609.1
MSTRG.3611	MSTRG.3611.1
MSTRG.3613	MSTRG.3613.1
MSTRG.3614	MSTRG.3614.1
MSTRG.3617	MSTRG.3617.1
MSTRG.3618	MSTRG.3618.1
MSTRG.3622	MSTRG.3622.1
MSTRG.3625	MSTRG.3625.1
MSTRG.3626	MSTRG.3626.1
MSTRG.3628	MSTRG.3628.1
MSTRG.3631	MSTRG.3631.1
MSTRG.3632	MSTRG.3632.1
MSTRG.3633	MSTRG.3633.1
MSTRG.3637	MSTRG.3637.1
MSTRG.3638	MSTRG.3638.1
MSTRG.3642	MSTRG.3642.1
MSTRG.3643	MSTRG.3643.1
MSTRG.3644	MSTRG.3644.1
MSTRG.3646	MSTRG.3646.1
MSTRG.3649	MSTRG.3649.1
MSTRG.3651	MSTRG.3651.1
MSTRG.3660	MSTRG.3660.1
MSTRG.3665	MSTRG.3665.1
MSTRG.3667	MSTRG.3667.1
MSTRG.3668	MSTRG.3668.1
MSTRG.3673	MSTRG.3673.1
MSTRG.3674	MSTRG.3674.1
MSTRG.3676	MSTRG.3676.1
MSTRG.3677	MSTRG.3677.1
MSTRG.368	MSTRG.368.1
MSTRG.3692	MSTRG.3692.1
MSTRG.3698	MSTRG.3698.1
MSTRG.3705	MSTRG.3705.1
MSTRG.3708	MSTRG.3708.1
MSTRG.3716	MSTRG.3716.1
MSTRG.3720	MSTRG.3720.1
MSTRG.3722	MSTRG.3722.1
MSTRG.3723	MSTRG.3723.1
MSTRG.3730	MSTRG.3730.1
MSTRG.3736	MSTRG.3736.1
MSTRG.3741	MSTRG.3741.1
MSTRG.3743	MSTRG.3743.1
MSTRG.3745	MSTRG.3745.1
MSTRG.3746	MSTRG.3746.1
MSTRG.3748	MSTRG.3748.1
MSTRG.3757	MSTRG.3757.1
MSTRG.3760	MSTRG.3760.1;MSTRG.3760.2
MSTRG.3761	MSTRG.3761.1
MSTRG.3765	MSTRG.3765.1
MSTRG.3770	MSTRG.3770.1
MSTRG.3771	MSTRG.3771.1
MSTRG.3774	MSTRG.3774.1
MSTRG.3777	MSTRG.3777.1;MSTRG.3777.2
MSTRG.3784	MSTRG.3784.1
MSTRG.3786	MSTRG.3786.1
MSTRG.379	MSTRG.379.1
MSTRG.3790	MSTRG.3790.1
MSTRG.3794	MSTRG.3794.1
MSTRG.3797	MSTRG.3797.1
MSTRG.3799	MSTRG.3799.1;MSTRG.3799.2
MSTRG.3801	MSTRG.3801.1
MSTRG.3805	MSTRG.3805.1
MSTRG.3807	MSTRG.3807.1
MSTRG.381	MSTRG.381.1
MSTRG.3814	MSTRG.3814.1;MSTRG.3814.2
MSTRG.3816	MSTRG.3816.1
MSTRG.3817	MSTRG.3817.1
MSTRG.3822	MSTRG.3822.1
MSTRG.3824	MSTRG.3824.1
MSTRG.3825	MSTRG.3825.1
MSTRG.3827	MSTRG.3827.1
MSTRG.3831	MSTRG.3831.1
MSTRG.3837	MSTRG.3837.1
MSTRG.3838	MSTRG.3838.1
MSTRG.3841	MSTRG.3841.1
MSTRG.3844	MSTRG.3844.1
MSTRG.3846	MSTRG.3846.1
MSTRG.3847	MSTRG.3847.1
MSTRG.3851	MSTRG.3851.1
MSTRG.3855	MSTRG.3855.1
MSTRG.3856	MSTRG.3856.1
MSTRG.3859	MSTRG.3859.1
MSTRG.3862	MSTRG.3862.1
MSTRG.3867	MSTRG.3867.1
MSTRG.3873	MSTRG.3873.1
MSTRG.3876	MSTRG.3876.1
MSTRG.3880	MSTRG.3880.1
MSTRG.3884	MSTRG.3884.1
MSTRG.3891	MSTRG.3891.1
MSTRG.3900	MSTRG.3900.1
MSTRG.3902	MSTRG.3902.1
MSTRG.3903	MSTRG.3903.1
MSTRG.3905	MSTRG.3905.1
MSTRG.3907	MSTRG.3907.1
MSTRG.3914	MSTRG.3914.1
MSTRG.3917	MSTRG.3917.1
MSTRG.3919	MSTRG.3919.1
MSTRG.3920	MSTRG.3920.1
MSTRG.3921	MSTRG.3921.1
MSTRG.3922	MSTRG.3922.1
MSTRG.3923	MSTRG.3923.1
MSTRG.3925	MSTRG.3925.1
MSTRG.3928	MSTRG.3928.1
MSTRG.3934	MSTRG.3934.1
MSTRG.3939	MSTRG.3939.1
MSTRG.3948	MSTRG.3948.1
MSTRG.3949	MSTRG.3949.1
MSTRG.3951	MSTRG.3951.1
MSTRG.3953	MSTRG.3953.1
MSTRG.3955	MSTRG.3955.1
MSTRG.3957	MSTRG.3957.1
MSTRG.3959	MSTRG.3959.1
MSTRG.3962	MSTRG.3962.1
MSTRG.3964	MSTRG.3964.1
MSTRG.3965	MSTRG.3965.1
MSTRG.3967	MSTRG.3967.1
MSTRG.3970	MSTRG.3970.1
MSTRG.3972	MSTRG.3972.1
MSTRG.3974	MSTRG.3974.1
MSTRG.3976	MSTRG.3976.1;MSTRG.3976.2
MSTRG.3978	MSTRG.3978.1
MSTRG.3979	MSTRG.3979.1
MSTRG.3983	MSTRG.3983.1
MSTRG.3984	MSTRG.3984.1
MSTRG.3985	MSTRG.3985.1
MSTRG.3988	MSTRG.3988.1
MSTRG.3999	MSTRG.3999.1
MSTRG.4001	MSTRG.4001.1
MSTRG.4004	MSTRG.4004.1
MSTRG.4005	MSTRG.4005.1
MSTRG.4008	MSTRG.4008.1
MSTRG.4011	MSTRG.4011.1
MSTRG.4016	MSTRG.4016.1
MSTRG.4018	MSTRG.4018.1
MSTRG.4022	MSTRG.4022.1
MSTRG.4026	MSTRG.4026.1;MSTRG.4026.2
MSTRG.4035	MSTRG.4035.1
MSTRG.4052	MSTRG.4052.1
MSTRG.4059	MSTRG.4059.1
MSTRG.406	MSTRG.406.1;MSTRG.406.2
MSTRG.4062	MSTRG.4062.1
MSTRG.4063	MSTRG.4063.1
MSTRG.4064	MSTRG.4064.1
MSTRG.4065	MSTRG.4065.1
MSTRG.4070	MSTRG.4070.1
MSTRG.4073	MSTRG.4073.1
MSTRG.4074	MSTRG.4074.1
MSTRG.4075	MSTRG.4075.1
MSTRG.4078	MSTRG.4078.1
MSTRG.4079	MSTRG.4079.1;MSTRG.4079.2
MSTRG.4080	MSTRG.4080.1
MSTRG.4086	MSTRG.4086.1
MSTRG.4087	MSTRG.4087.1
MSTRG.4088	MSTRG.4088.1
MSTRG.409	MSTRG.409.1
MSTRG.4090	MSTRG.4090.1
MSTRG.4093	MSTRG.4093.1
MSTRG.4095	MSTRG.4095.1;MSTRG.4095.2
MSTRG.4096	MSTRG.4096.1
MSTRG.4099	MSTRG.4099.1
MSTRG.4100	MSTRG.4100.1
MSTRG.4101	MSTRG.4101.1
MSTRG.4102	MSTRG.4102.1
MSTRG.4105	MSTRG.4105.1
MSTRG.4111	MSTRG.4111.1
MSTRG.4112	MSTRG.4112.1
MSTRG.4116	MSTRG.4116.1
MSTRG.4117	MSTRG.4117.1
MSTRG.4121	MSTRG.4121.1
MSTRG.4124	MSTRG.4124.1
MSTRG.4127	MSTRG.4127.1
MSTRG.4131	MSTRG.4131.1
MSTRG.4132	MSTRG.4132.1
MSTRG.4134	MSTRG.4134.1
MSTRG.4135	MSTRG.4135.1
MSTRG.4138	MSTRG.4138.1
MSTRG.414	MSTRG.414.1
MSTRG.4140	MSTRG.4140.1
MSTRG.4142	MSTRG.4142.1
MSTRG.4144	MSTRG.4144.1
MSTRG.4151	MSTRG.4151.1
MSTRG.4156	MSTRG.4156.1
MSTRG.4163	MSTRG.4163.1
MSTRG.4164	MSTRG.4164.1
MSTRG.4165	MSTRG.4165.1
MSTRG.4168	MSTRG.4168.1
MSTRG.4169	MSTRG.4169.1
MSTRG.4170	MSTRG.4170.1
MSTRG.4176	MSTRG.4176.1
MSTRG.418	MSTRG.418.1
MSTRG.4182	MSTRG.4182.1
MSTRG.4188	MSTRG.4188.1
MSTRG.4191	MSTRG.4191.1
MSTRG.4194	MSTRG.4194.1
MSTRG.4201	MSTRG.4201.1
MSTRG.4204	MSTRG.4204.1
MSTRG.4206	MSTRG.4206.1
MSTRG.4210	MSTRG.4210.1
MSTRG.4212	MSTRG.4212.1
MSTRG.4213	MSTRG.4213.1
MSTRG.4216	MSTRG.4216.1
MSTRG.4218	MSTRG.4218.1
MSTRG.4219	MSTRG.4219.1
MSTRG.4222	MSTRG.4222.1
MSTRG.4229	MSTRG.4229.1
MSTRG.4230	MSTRG.4230.1
MSTRG.4232	MSTRG.4232.1
MSTRG.4234	MSTRG.4234.1
MSTRG.4235	MSTRG.4235.1
MSTRG.4236	MSTRG.4236.1
MSTRG.4237	MSTRG.4237.1
MSTRG.4238	MSTRG.4238.1
MSTRG.4239	MSTRG.4239.1
MSTRG.424	MSTRG.424.1
MSTRG.4240	MSTRG.4240.1
MSTRG.4242	MSTRG.4242.1
MSTRG.4245	MSTRG.4245.1
MSTRG.4246	MSTRG.4246.1
MSTRG.4247	MSTRG.4247.1
MSTRG.4248	MSTRG.4248.1
MSTRG.4249	MSTRG.4249.1
MSTRG.425	MSTRG.425.1
MSTRG.4250	MSTRG.4250.1
MSTRG.4251	MSTRG.4251.1
MSTRG.4252	MSTRG.4252.1
MSTRG.4258	MSTRG.4258.1
MSTRG.4291	MSTRG.4291.1
MSTRG.4295	MSTRG.4295.1
MSTRG.4297	MSTRG.4297.1;MSTRG.4297.2
MSTRG.4298	MSTRG.4298.1
MSTRG.4315	MSTRG.4315.1
MSTRG.4383	MSTRG.4383.1
MSTRG.4389	MSTRG.4389.1
MSTRG.4392	MSTRG.4392.1
MSTRG.44	MSTRG.44.1
MSTRG.4406	MSTRG.4406.1
MSTRG.4408	MSTRG.4408.1
MSTRG.4413	MSTRG.4413.1
MSTRG.4424	MSTRG.4424.1
MSTRG.4428	MSTRG.4428.1
MSTRG.4453	MSTRG.4453.1
MSTRG.4456	MSTRG.4456.1
MSTRG.446	MSTRG.446.1
MSTRG.4460	MSTRG.4460.1
MSTRG.4479	MSTRG.4479.1
MSTRG.4492	MSTRG.4492.1
MSTRG.45	MSTRG.45.1;MSTRG.45.2
MSTRG.4501	MSTRG.4501.1
MSTRG.4509	MSTRG.4509.1;MSTRG.4509.2
MSTRG.4516	MSTRG.4516.1
MSTRG.4521	MSTRG.4521.1
MSTRG.4529	MSTRG.4529.1
MSTRG.4554	MSTRG.4554.1
MSTRG.4562	MSTRG.4562.1
MSTRG.4576	MSTRG.4576.1
MSTRG.4580	MSTRG.4580.1
MSTRG.4587	MSTRG.4587.1
MSTRG.4588	MSTRG.4588.1
MSTRG.459	MSTRG.459.1
MSTRG.4594	MSTRG.4594.1
MSTRG.4600	MSTRG.4600.1
MSTRG.4604	MSTRG.4604.1
MSTRG.4615	MSTRG.4615.1
MSTRG.4620	MSTRG.4620.1
MSTRG.4624	MSTRG.4624.1
MSTRG.4626	MSTRG.4626.1
MSTRG.4640	MSTRG.4640.1;MSTRG.4640.2
MSTRG.4642	MSTRG.4642.1
MSTRG.465	MSTRG.465.1
MSTRG.4660	MSTRG.4660.1
MSTRG.4677	MSTRG.4677.1
MSTRG.4684	MSTRG.4684.1
MSTRG.4691	MSTRG.4691.1
MSTRG.4692	MSTRG.4692.1
MSTRG.4706	MSTRG.4706.1
MSTRG.471	MSTRG.471.1
MSTRG.4714	MSTRG.4714.1;MSTRG.4714.2
MSTRG.4720	MSTRG.4720.1
MSTRG.4721	MSTRG.4721.1
MSTRG.4730	MSTRG.4730.1
MSTRG.474	MSTRG.474.1
MSTRG.4747	MSTRG.4747.1
MSTRG.475	MSTRG.475.1;MSTRG.475.2
MSTRG.4761	MSTRG.4761.1
MSTRG.4762	MSTRG.4762.1
MSTRG.4766	MSTRG.4766.1
MSTRG.4767	MSTRG.4767.1
MSTRG.4768	MSTRG.4768.1
MSTRG.4799	MSTRG.4799.1
MSTRG.4803	MSTRG.4803.1
MSTRG.4819	MSTRG.4819.1;MSTRG.4819.2
MSTRG.4821	MSTRG.4821.1
MSTRG.4827	MSTRG.4827.1
MSTRG.483	MSTRG.483.1
MSTRG.4832	MSTRG.4832.1
MSTRG.4839	MSTRG.4839.1
MSTRG.484	MSTRG.484.1
MSTRG.4842	MSTRG.4842.1
MSTRG.4844	MSTRG.4844.1
MSTRG.4848	MSTRG.4848.1
MSTRG.4864	MSTRG.4864.1
MSTRG.4866	MSTRG.4866.1
MSTRG.4867	MSTRG.4867.1
MSTRG.4888	MSTRG.4888.1
MSTRG.4889	MSTRG.4889.1
MSTRG.4896	MSTRG.4896.1
MSTRG.4899	MSTRG.4899.1
MSTRG.4906	MSTRG.4906.1;MSTRG.4906.2
MSTRG.4911	MSTRG.4911.1;MSTRG.4911.2;MSTRG.4911.3
MSTRG.4919	MSTRG.4919.1
MSTRG.492	MSTRG.492.1
MSTRG.4923	MSTRG.4923.1
MSTRG.4928	MSTRG.4928.1
MSTRG.4934	MSTRG.4934.1
MSTRG.4935	MSTRG.4935.1
MSTRG.4938	MSTRG.4938.1
MSTRG.4941	MSTRG.4941.1
MSTRG.4945	MSTRG.4945.1
MSTRG.4949	MSTRG.4949.1
MSTRG.4952	MSTRG.4952.1;MSTRG.4952.2
MSTRG.4960	MSTRG.4960.1
MSTRG.4963	MSTRG.4963.1
MSTRG.4964	MSTRG.4964.1
MSTRG.4967	MSTRG.4967.1
MSTRG.4983	MSTRG.4983.1
MSTRG.4985	MSTRG.4985.1
MSTRG.4988	MSTRG.4988.1
MSTRG.4990	MSTRG.4990.1
MSTRG.4997	MSTRG.4997.1
MSTRG.5002	MSTRG.5002.1
MSTRG.5018	MSTRG.5018.1
MSTRG.5043	MSTRG.5043.1
MSTRG.5047	MSTRG.5047.1
MSTRG.5054	MSTRG.5054.1;MSTRG.5054.2
MSTRG.5055	MSTRG.5055.1
MSTRG.5058	MSTRG.5058.1
MSTRG.5065	MSTRG.5065.1
MSTRG.5066	MSTRG.5066.1
MSTRG.5073	MSTRG.5073.1
MSTRG.5076	MSTRG.5076.1
MSTRG.508	MSTRG.508.1
MSTRG.5083	MSTRG.5083.1
MSTRG.5086	MSTRG.5086.1
MSTRG.5095	MSTRG.5095.1
MSTRG.51	MSTRG.51.1
MSTRG.5101	MSTRG.5101.1
MSTRG.5102	MSTRG.5102.1
MSTRG.5109	MSTRG.5109.1
MSTRG.5111	MSTRG.5111.1
MSTRG.5112	MSTRG.5112.1
MSTRG.5113	MSTRG.5113.1
MSTRG.5114	MSTRG.5114.1
MSTRG.5115	MSTRG.5115.1
MSTRG.5121	MSTRG.5121.1
MSTRG.5122	MSTRG.5122.1
MSTRG.5124	MSTRG.5124.1
MSTRG.5136	MSTRG.5136.1
MSTRG.5143	MSTRG.5143.1
MSTRG.515	MSTRG.515.1
MSTRG.5150	MSTRG.5150.1
MSTRG.5157	MSTRG.5157.1
MSTRG.517	MSTRG.517.1
MSTRG.5172	MSTRG.5172.1
MSTRG.5176	MSTRG.5176.1;MSTRG.5176.2
MSTRG.5182	MSTRG.5182.1
MSTRG.5201	MSTRG.5201.1
MSTRG.5206	MSTRG.5206.1
MSTRG.5256	MSTRG.5256.1
MSTRG.5259	MSTRG.5259.1
MSTRG.5266	MSTRG.5266.1
MSTRG.5269	MSTRG.5269.1
MSTRG.5270	MSTRG.5270.1;MSTRG.5270.2
MSTRG.5286	MSTRG.5286.1
MSTRG.5288	MSTRG.5288.1
MSTRG.529	MSTRG.529.1
MSTRG.5290	MSTRG.5290.1
MSTRG.5294	MSTRG.5294.1
MSTRG.5295	MSTRG.5295.1
MSTRG.5297	MSTRG.5297.1
MSTRG.5326	MSTRG.5326.1
MSTRG.5329	MSTRG.5329.1
MSTRG.5365	MSTRG.5365.1
MSTRG.5371	MSTRG.5371.1
MSTRG.5372	MSTRG.5372.1;MSTRG.5372.2
MSTRG.5373	MSTRG.5373.1;MSTRG.5373.2
MSTRG.5374	MSTRG.5374.1
MSTRG.5375	MSTRG.5375.1
MSTRG.5383	MSTRG.5383.1
MSTRG.5393	MSTRG.5393.1
MSTRG.5398	MSTRG.5398.1
MSTRG.5404	MSTRG.5404.1
MSTRG.5405	MSTRG.5405.1
MSTRG.5409	MSTRG.5409.1;MSTRG.5409.2
MSTRG.5415	MSTRG.5415.1
MSTRG.5420	MSTRG.5420.1
MSTRG.5425	MSTRG.5425.1
MSTRG.5435	MSTRG.5435.1
MSTRG.5436	MSTRG.5436.1
MSTRG.5443	MSTRG.5443.1
MSTRG.5448	MSTRG.5448.1
MSTRG.5449	MSTRG.5449.1
MSTRG.5451	MSTRG.5451.1
MSTRG.5455	MSTRG.5455.1
MSTRG.5460	MSTRG.5460.1
MSTRG.5466	MSTRG.5466.1
MSTRG.5470	MSTRG.5470.1
MSTRG.5476	MSTRG.5476.1
MSTRG.5478	MSTRG.5478.1
MSTRG.548	MSTRG.548.1
MSTRG.5482	MSTRG.5482.1
MSTRG.5495	MSTRG.5495.1
MSTRG.5521	MSTRG.5521.1
MSTRG.5526	MSTRG.5526.1
MSTRG.5527	MSTRG.5527.1
MSTRG.5545	MSTRG.5545.1
MSTRG.5557	MSTRG.5557.1
MSTRG.5564	MSTRG.5564.1
MSTRG.5566	MSTRG.5566.1
MSTRG.5584	MSTRG.5584.1
MSTRG.5586	MSTRG.5586.1;MSTRG.5586.2
MSTRG.5589	MSTRG.5589.1
MSTRG.5594	MSTRG.5594.1
MSTRG.5604	MSTRG.5604.1
MSTRG.5614	MSTRG.5614.1
MSTRG.5635	MSTRG.5635.1
MSTRG.5641	MSTRG.5641.1
MSTRG.5658	MSTRG.5658.1
MSTRG.5667	MSTRG.5667.1
MSTRG.567	MSTRG.567.1
MSTRG.5671	MSTRG.5671.1
MSTRG.5685	MSTRG.5685.1;MSTRG.5685.2
MSTRG.5699	MSTRG.5699.1
MSTRG.570	MSTRG.570.1
MSTRG.5718	MSTRG.5718.1
MSTRG.5720	MSTRG.5720.1
MSTRG.5722	MSTRG.5722.1
MSTRG.5737	MSTRG.5737.1
MSTRG.5740	MSTRG.5740.1
MSTRG.5757	MSTRG.5757.1
MSTRG.5768	MSTRG.5768.1
MSTRG.5770	MSTRG.5770.1
MSTRG.5772	MSTRG.5772.1
MSTRG.5781	MSTRG.5781.1
MSTRG.5785	MSTRG.5785.1
MSTRG.5791	MSTRG.5791.1
MSTRG.5792	MSTRG.5792.1
MSTRG.5796	MSTRG.5796.1
MSTRG.5811	MSTRG.5811.1
MSTRG.5829	MSTRG.5829.1
MSTRG.5831	MSTRG.5831.1
MSTRG.5837	MSTRG.5837.1
MSTRG.5848	MSTRG.5848.1
MSTRG.585	MSTRG.585.1
MSTRG.5850	MSTRG.5850.1
MSTRG.5854	MSTRG.5854.1
MSTRG.5859	MSTRG.5859.1
MSTRG.586	MSTRG.586.1
MSTRG.5864	MSTRG.5864.1;MSTRG.5864.2
MSTRG.5878	MSTRG.5878.1
MSTRG.5879	MSTRG.5879.1
MSTRG.5883	MSTRG.5883.1
MSTRG.5892	MSTRG.5892.1
MSTRG.59	MSTRG.59.1
MSTRG.590	MSTRG.590.1
MSTRG.5903	MSTRG.5903.1
MSTRG.5912	MSTRG.5912.1
MSTRG.5918	MSTRG.5918.1;MSTRG.5918.2
MSTRG.5927	MSTRG.5927.1
MSTRG.593	MSTRG.593.1
MSTRG.5947	MSTRG.5947.1
MSTRG.5949	MSTRG.5949.1
MSTRG.5958	MSTRG.5958.1
MSTRG.5961	MSTRG.5961.1;MSTRG.5961.2
MSTRG.5967	MSTRG.5967.1
MSTRG.5969	MSTRG.5969.1
MSTRG.5978	MSTRG.5978.1
MSTRG.5979	MSTRG.5979.1
MSTRG.5982	MSTRG.5982.1
MSTRG.601	MSTRG.601.1
MSTRG.6010	MSTRG.6010.1
MSTRG.6019	MSTRG.6019.1
MSTRG.6035	MSTRG.6035.1
MSTRG.6036	MSTRG.6036.1
MSTRG.604	MSTRG.604.1
MSTRG.6049	MSTRG.6049.1
MSTRG.607	MSTRG.607.1
MSTRG.6077	MSTRG.6077.1
MSTRG.6087	MSTRG.6087.1
MSTRG.6088	MSTRG.6088.1
MSTRG.609	MSTRG.609.1
MSTRG.6090	MSTRG.6090.1
MSTRG.6102	MSTRG.6102.1;MSTRG.6102.2
MSTRG.6105	MSTRG.6105.1
MSTRG.6106	MSTRG.6106.1
MSTRG.6112	MSTRG.6112.1
MSTRG.6132	MSTRG.6132.1
MSTRG.6143	MSTRG.6143.1
MSTRG.6149	MSTRG.6149.1
MSTRG.6151	MSTRG.6151.1
MSTRG.6152	MSTRG.6152.1
MSTRG.6159	MSTRG.6159.1
MSTRG.616	MSTRG.616.1
MSTRG.6160	MSTRG.6160.1
MSTRG.6165	MSTRG.6165.1
MSTRG.6169	MSTRG.6169.1
MSTRG.617	MSTRG.617.1
MSTRG.6170	MSTRG.6170.1
MSTRG.6172	MSTRG.6172.1
MSTRG.6174	MSTRG.6174.1
MSTRG.6177	MSTRG.6177.1
MSTRG.6179	MSTRG.6179.1
MSTRG.6180	MSTRG.6180.1
MSTRG.6183	MSTRG.6183.1
MSTRG.6187	MSTRG.6187.1
MSTRG.6195	MSTRG.6195.1
MSTRG.6196	MSTRG.6196.1
MSTRG.62	MSTRG.62.1
MSTRG.6204	MSTRG.6204.1
MSTRG.6205	MSTRG.6205.1
MSTRG.6211	MSTRG.6211.1
MSTRG.6218	MSTRG.6218.1
MSTRG.6219	MSTRG.6219.1
MSTRG.6220	MSTRG.6220.1
MSTRG.6221	MSTRG.6221.1
MSTRG.6228	MSTRG.6228.1
MSTRG.623	MSTRG.623.1
MSTRG.6235	MSTRG.6235.1;MSTRG.6235.2
MSTRG.6244	MSTRG.6244.1
MSTRG.6245	MSTRG.6245.1
MSTRG.6249	MSTRG.6249.1
MSTRG.625	MSTRG.625.1
MSTRG.6257	MSTRG.6257.1
MSTRG.6258	MSTRG.6258.1
MSTRG.6264	MSTRG.6264.1
MSTRG.6269	MSTRG.6269.1
MSTRG.628	MSTRG.628.1
MSTRG.6282	MSTRG.6282.1
MSTRG.6305	MSTRG.6305.1
MSTRG.6309	MSTRG.6309.1
MSTRG.6331	MSTRG.6331.1;MSTRG.6331.2
MSTRG.6334	MSTRG.6334.1
MSTRG.6341	MSTRG.6341.1
MSTRG.6342	MSTRG.6342.1
MSTRG.6346	MSTRG.6346.1
MSTRG.6348	MSTRG.6348.1
MSTRG.6351	MSTRG.6351.1
MSTRG.6357	MSTRG.6357.1
MSTRG.637	MSTRG.637.1
MSTRG.6374	MSTRG.6374.1
MSTRG.6375	MSTRG.6375.1
MSTRG.6394	MSTRG.6394.1
MSTRG.6396	MSTRG.6396.1
MSTRG.6398	MSTRG.6398.1
MSTRG.6406	MSTRG.6406.1
MSTRG.6414	MSTRG.6414.1
MSTRG.6421	MSTRG.6421.1;MSTRG.6421.2
MSTRG.6431	MSTRG.6431.1
MSTRG.6435	MSTRG.6435.1
MSTRG.6437	MSTRG.6437.1
MSTRG.6454	MSTRG.6454.1
MSTRG.6458	MSTRG.6458.1
MSTRG.6459	MSTRG.6459.1
MSTRG.6467	MSTRG.6467.1
MSTRG.6484	MSTRG.6484.1
MSTRG.6487	MSTRG.6487.1
MSTRG.6490	MSTRG.6490.1
MSTRG.6499	MSTRG.6499.1
MSTRG.6502	MSTRG.6502.1
MSTRG.6504	MSTRG.6504.1
MSTRG.6507	MSTRG.6507.1
MSTRG.6508	MSTRG.6508.1
MSTRG.6510	MSTRG.6510.1
MSTRG.6513	MSTRG.6513.1;MSTRG.6513.2;MSTRG.6513.3;MSTRG.6513.4;MSTRG.6513.5
MSTRG.6520	MSTRG.6520.1
MSTRG.6526	MSTRG.6526.1
MSTRG.653	MSTRG.653.1;MSTRG.653.2
MSTRG.6533	MSTRG.6533.1;MSTRG.6533.2
MSTRG.6534	MSTRG.6534.1
MSTRG.6539	MSTRG.6539.1
MSTRG.6544	MSTRG.6544.1
MSTRG.6551	MSTRG.6551.1
MSTRG.6554	MSTRG.6554.1
MSTRG.6560	MSTRG.6560.1
MSTRG.6569	MSTRG.6569.1
MSTRG.6572	MSTRG.6572.1
MSTRG.6584	MSTRG.6584.1;MSTRG.6584.2
MSTRG.659	MSTRG.659.1
MSTRG.6595	MSTRG.6595.1
MSTRG.6609	MSTRG.6609.1
MSTRG.6622	MSTRG.6622.1
MSTRG.6627	MSTRG.6627.1
MSTRG.663	MSTRG.663.1
MSTRG.6634	MSTRG.6634.1
MSTRG.6636	MSTRG.6636.1
MSTRG.6637	MSTRG.6637.1
MSTRG.6638	MSTRG.6638.1
MSTRG.6640	MSTRG.6640.1
MSTRG.6650	MSTRG.6650.1
MSTRG.6657	MSTRG.6657.1
MSTRG.6659	MSTRG.6659.1
MSTRG.6661	MSTRG.6661.1;MSTRG.6661.2
MSTRG.669	MSTRG.669.1
MSTRG.6692	MSTRG.6692.1
MSTRG.6694	MSTRG.6694.1
MSTRG.6698	MSTRG.6698.1
MSTRG.6703	MSTRG.6703.1
MSTRG.6707	MSTRG.6707.1
MSTRG.6708	MSTRG.6708.1
MSTRG.6709	MSTRG.6709.1
MSTRG.6712	MSTRG.6712.1
MSTRG.6722	MSTRG.6722.1
MSTRG.6724	MSTRG.6724.1
MSTRG.6725	MSTRG.6725.1
MSTRG.6728	MSTRG.6728.1
MSTRG.6737	MSTRG.6737.1
MSTRG.6738	MSTRG.6738.1
MSTRG.6745	MSTRG.6745.1
MSTRG.6749	MSTRG.6749.1
MSTRG.6756	MSTRG.6756.1
MSTRG.6772	MSTRG.6772.1
MSTRG.6782	MSTRG.6782.1
MSTRG.6784	MSTRG.6784.1
MSTRG.6792	MSTRG.6792.1
MSTRG.6793	MSTRG.6793.1
MSTRG.6821	MSTRG.6821.1
MSTRG.6826	MSTRG.6826.1
MSTRG.683	MSTRG.683.1
MSTRG.6841	MSTRG.6841.1
MSTRG.6846	MSTRG.6846.1
MSTRG.6856	MSTRG.6856.1
MSTRG.6862	MSTRG.6862.1
MSTRG.6865	MSTRG.6865.1
MSTRG.6881	MSTRG.6881.1
MSTRG.6886	MSTRG.6886.1
MSTRG.6889	MSTRG.6889.1
MSTRG.689	MSTRG.689.1
MSTRG.6890	MSTRG.6890.1
MSTRG.6892	MSTRG.6892.1
MSTRG.6897	MSTRG.6897.1
MSTRG.6898	MSTRG.6898.1
MSTRG.6903	MSTRG.6903.1
MSTRG.6910	MSTRG.6910.1
MSTRG.6912	MSTRG.6912.1;MSTRG.6912.2
MSTRG.6919	MSTRG.6919.1
MSTRG.6923	MSTRG.6923.1
MSTRG.6932	MSTRG.6932.1
MSTRG.6936	MSTRG.6936.1
MSTRG.6948	MSTRG.6948.1
MSTRG.6950	MSTRG.6950.1
MSTRG.6955	MSTRG.6955.1;MSTRG.6955.2
MSTRG.6978	MSTRG.6978.1
MSTRG.6984	MSTRG.6984.1
MSTRG.6986	MSTRG.6986.1
MSTRG.6990	MSTRG.6990.1
MSTRG.6991	MSTRG.6991.1
MSTRG.6995	MSTRG.6995.1
MSTRG.6996	MSTRG.6996.1
MSTRG.7	MSTRG.7.1
MSTRG.700	MSTRG.700.1
MSTRG.7001	MSTRG.7001.1
MSTRG.7004	MSTRG.7004.1
MSTRG.7013	MSTRG.7013.1;MSTRG.7013.2
MSTRG.7015	MSTRG.7015.1
MSTRG.7025	MSTRG.7025.1
MSTRG.7055	MSTRG.7055.1;MSTRG.7055.2
MSTRG.7071	MSTRG.7071.1
MSTRG.7072	MSTRG.7072.1
MSTRG.7076	MSTRG.7076.1
MSTRG.7078	MSTRG.7078.1
MSTRG.7081	MSTRG.7081.1;MSTRG.7081.2
MSTRG.7093	MSTRG.7093.1
MSTRG.7095	MSTRG.7095.1
MSTRG.7096	MSTRG.7096.1;MSTRG.7096.2
MSTRG.7097	MSTRG.7097.1
MSTRG.7103	MSTRG.7103.1
MSTRG.7104	MSTRG.7104.1
MSTRG.711	MSTRG.711.1
MSTRG.7121	MSTRG.7121.1
MSTRG.7124	MSTRG.7124.1
MSTRG.7132	MSTRG.7132.1
MSTRG.7134	MSTRG.7134.1
MSTRG.7178	MSTRG.7178.1
MSTRG.720	MSTRG.720.1
MSTRG.7201	MSTRG.7201.1
MSTRG.7204	MSTRG.7204.1
MSTRG.7233	MSTRG.7233.1;MSTRG.7233.2
MSTRG.7238	MSTRG.7238.1
MSTRG.7240	MSTRG.7240.1
MSTRG.7252	MSTRG.7252.1
MSTRG.7253	MSTRG.7253.1
MSTRG.7264	MSTRG.7264.1
MSTRG.7265	MSTRG.7265.1
MSTRG.7278	MSTRG.7278.1
MSTRG.7280	MSTRG.7280.1
MSTRG.7286	MSTRG.7286.1;MSTRG.7286.2
MSTRG.729	MSTRG.729.1
MSTRG.7292	MSTRG.7292.1
MSTRG.7293	MSTRG.7293.1
MSTRG.7297	MSTRG.7297.1
MSTRG.7299	MSTRG.7299.1
MSTRG.7301	MSTRG.7301.1
MSTRG.7303	MSTRG.7303.1
MSTRG.7308	MSTRG.7308.1
MSTRG.7317	MSTRG.7317.1
MSTRG.7324	MSTRG.7324.1
MSTRG.7325	MSTRG.7325.1
MSTRG.7327	MSTRG.7327.1
MSTRG.7331	MSTRG.7331.1
MSTRG.7337	MSTRG.7337.1;MSTRG.7337.2
MSTRG.7338	MSTRG.7338.1
MSTRG.7341	MSTRG.7341.1
MSTRG.7355	MSTRG.7355.1
MSTRG.7358	MSTRG.7358.1;MSTRG.7358.2
MSTRG.7361	MSTRG.7361.1
MSTRG.7368	MSTRG.7368.1;MSTRG.7368.2
MSTRG.7374	MSTRG.7374.1
MSTRG.7376	MSTRG.7376.1
MSTRG.7378	MSTRG.7378.1;MSTRG.7378.2
MSTRG.738	MSTRG.738.1
MSTRG.7387	MSTRG.7387.1
MSTRG.7392	MSTRG.7392.1
MSTRG.7393	MSTRG.7393.1
MSTRG.7398	MSTRG.7398.1
MSTRG.7409	MSTRG.7409.1;MSTRG.7409.2
MSTRG.7419	MSTRG.7419.1
MSTRG.742	MSTRG.742.1
MSTRG.7423	MSTRG.7423.1;MSTRG.7423.2
MSTRG.7424	MSTRG.7424.1
MSTRG.7429	MSTRG.7429.1
MSTRG.7431	MSTRG.7431.1
MSTRG.7434	MSTRG.7434.1
MSTRG.7445	MSTRG.7445.1
MSTRG.7453	MSTRG.7453.1
MSTRG.7462	MSTRG.7462.1
MSTRG.7466	MSTRG.7466.1;MSTRG.7466.2
MSTRG.7467	MSTRG.7467.1
MSTRG.7469	MSTRG.7469.1;MSTRG.7469.2
MSTRG.7470	MSTRG.7470.1
MSTRG.7478	MSTRG.7478.1
MSTRG.7481	MSTRG.7481.1
MSTRG.7482	MSTRG.7482.1
MSTRG.7483	MSTRG.7483.1
MSTRG.7488	MSTRG.7488.1;MSTRG.7488.2
MSTRG.7492	MSTRG.7492.1;MSTRG.7492.2
MSTRG.7494	MSTRG.7494.1
MSTRG.7502	MSTRG.7502.1
MSTRG.7512	MSTRG.7512.1
MSTRG.7515	MSTRG.7515.1
MSTRG.7523	MSTRG.7523.1
MSTRG.7525	MSTRG.7525.1
MSTRG.7528	MSTRG.7528.1
MSTRG.7535	MSTRG.7535.1;MSTRG.7535.2
MSTRG.7536	MSTRG.7536.1
MSTRG.7537	MSTRG.7537.1
MSTRG.7543	MSTRG.7543.1
MSTRG.7545	MSTRG.7545.1
MSTRG.7557	MSTRG.7557.1
MSTRG.7558	MSTRG.7558.1
MSTRG.7563	MSTRG.7563.1
MSTRG.7583	MSTRG.7583.1
MSTRG.7595	MSTRG.7595.1
MSTRG.7611	MSTRG.7611.1
MSTRG.7612	MSTRG.7612.1
MSTRG.7644	MSTRG.7644.1
MSTRG.7649	MSTRG.7649.1
MSTRG.7650	MSTRG.7650.1
MSTRG.7652	MSTRG.7652.1
MSTRG.7653	MSTRG.7653.1
MSTRG.7662	MSTRG.7662.1
MSTRG.7669	MSTRG.7669.1
MSTRG.7673	MSTRG.7673.1
MSTRG.7687	MSTRG.7687.1
MSTRG.7688	MSTRG.7688.1
MSTRG.7691	MSTRG.7691.1;MSTRG.7691.2
MSTRG.7693	MSTRG.7693.1
MSTRG.7695	MSTRG.7695.1
MSTRG.7703	MSTRG.7703.1
MSTRG.7704	MSTRG.7704.1
MSTRG.7726	MSTRG.7726.1
MSTRG.7727	MSTRG.7727.1
MSTRG.7728	MSTRG.7728.1
MSTRG.7734	MSTRG.7734.1
MSTRG.7737	MSTRG.7737.1
MSTRG.7740	MSTRG.7740.1
MSTRG.7764	MSTRG.7764.1
MSTRG.7765	MSTRG.7765.1
MSTRG.7768	MSTRG.7768.1
MSTRG.7769	MSTRG.7769.1
MSTRG.7780	MSTRG.7780.1
MSTRG.7804	MSTRG.7804.1
MSTRG.781	MSTRG.781.1
MSTRG.7823	MSTRG.7823.1
MSTRG.7825	MSTRG.7825.1
MSTRG.7828	MSTRG.7828.1
MSTRG.7829	MSTRG.7829.1
MSTRG.7846	MSTRG.7846.1
MSTRG.7867	MSTRG.7867.1
MSTRG.7869	MSTRG.7869.1
MSTRG.7879	MSTRG.7879.1
MSTRG.7881	MSTRG.7881.1
MSTRG.7890	MSTRG.7890.1
[truncated: 361 more rows]
