# Supplementary material for: Identification of Novel Genes and Proteoforms in Angiostrongylus costaricensis through a Proteogenomic Approach
Source: Pathogens. 2022 Oct 31;11(11):1273. doi: 10.3390/pathogens11111273 (PMC9694666; doi:10.3390/pathogens11111273)
Supplement: Supplementary file 1 [file pathogens-11-01273-s001.zip › Supplemental_Data_S6.xlsx]

## Sheet: fpkm.exclusive
Supplemental Data S6. Normalized transcript levels (FPKM) of each quantified ncRNA
ncRNA	Sample 1	Sample 2	Sample 3	Sample 4	Sample 5	Sample 6
(tRNA-Leu-CAG-6-1).1450	0	0	0	0	0	0
Cis-reg.1011	0	0	0	0	0	0
Cis-reg.1024	0	0	0	0	0	0
Cis-reg.1092	7.62441	6.22197	10.4197	6.14909	13.6105	13.4122
Cis-reg.892	562.558	232.483	272.696	157.051	566.489	63.4362
miRNA.1021	0	0	3.42432	0	0	0
miRNA.1026	0	0	0	0	0	0
miRNA.1069	19.5259	2.65572	2.96496	15.7477	23.2374	22.8989
miRNA.15	0	0	0	0	0	0
miRNA.54	0	0	0	0	0	0
miRNA.906	0	0	0	0	0	0
miRNA.955	0	0	0	0	0	0
miRNA.992	0	3.06717	6.84864	6.06248	13.4188	0
ncRNA.1626	0	0	0	0	0	0
ncRNA.48	0	0	0	0	0	0
ncRNA.64	0	0	0	0	0	0
ncRNA.876	0	0	0	0	0	0
ncRNA.887	0	0	0	0	0	0
piRNA.1792	0	0	0	0	0	0
piRNA.1900	0	0	0	0	0	0
piRNA.1934	0	0	0	0	0	0
rRNA.1175	0	0	0	0	0	0
rRNA.1225	0	0	0	0	0	0
rRNA.1348	231242	317662	99908.5	49175.8	48237	57630.3
rRNA.1349	418143	656741	163688	97107.5	91906	102965
rRNA.1350	941898	1.48029e+06	356301	274182	221665	242271
rRNA.1351	1.619e+07	2.2269e+07	4.56446e+06	2.45097e+06	3.33753e+06	2.40179e+06
rRNA.1352	364.576	487.68	140.397	72.7497	107.35	26.4466
rRNA.1357	11.773	41.6323	0	0	0	0
rRNA.1360	139505	152729	49705	18037.3	34275.7	18240.6
rRNA.145	10.4177	41.1996	14.6022	12.926	2.86106	7.04846
rRNA.450	1005.27	504.15	579.508	1733.54	2231.74	1903.43
rRNA.451	5032.11	2920.87	3311.16	9681.39	12143.6	10394.5
rRNA.58	0	0	0	0	0	0
rRNA.68	14.8252	51.4177	16.8838	5.97828	39.6972	13.0397
rRNA.874	407.694	456.71	84.419	47.8262	52.9296	32.5991
rRNA.89	0	0	0	0	0	0
rRNA.908	6.43023	2.62372	0	0	0	0
rRNA.95	0	0	0	0	0	0
rRNA.981	90.0232	36.7321	348.579	663.805	436.191	831.396
sRNA.1239	0	0	0	0	0	0
snoRNA.1029	0	10.4949	8.78772	0	22.9574	11.3115
splicing.1064	7.73491	9.46822	7.04715	0	0	27.2132
splicing.1177	0	7.50928	4.19184	0	0	0
splicing.1185	0	0	0	0	0	0
splicing.1244	0	6.04914	0	0	0	13.0397
splicing.854	0	0	0	0	0	0
splicing.886	112.672	333.913	551.087	325.218	42.3436	719.789
splicing.944	0	0	0	0	0	0
splicing.945	0	0	0	0	0	0
tRNA-Ala.986	0	0	0	0	0	0
tRNA-Arg.6	0	0	0	0	13.2324	0
tRNA-Asn.979	0	0	0	0	0	0
tRNA-Asp.1763	0	0	0	0	0	0
tRNA-Asp.1764	0	0	0	0	0	0
tRNA-Asp.1957	0	0	0	0	0	0
tRNA-Asp.1958	0	0	0	0	0	0
tRNA-Cys.989	0	0	0	0	0	0
tRNA-Glu.1429	0	0	0	0	0	0
tRNA-Glu.1641	0	0	0	0	0	0
tRNA-Glu.982	0	0	0	0	0	0
tRNA-Gly.1235	0	0	0	0	0	0
tRNA-His.987	0	0	0	0	0	0
tRNA-Ile.39	0	0	0	0	0	0
tRNA-Leu.1456	0	0	0	0	0	0
tRNA-Leu.1572	0	0	0	0	0	0
tRNA-Leu1.1016	0	0	0	0	0	0
tRNA-Lys.1479	0	0	0	0	0	0
tRNA-Lys.1482	0	0	0	0	0	0
tRNA-Lys.1782	0	0	0	0	0	0
tRNA-Lys.1790	0	0	0	0	0	0
tRNA-Lys.1791	0	0	0	0	0	0
tRNA-Lys.511	0	0	0	0	0	0
tRNA-Lys.721	0	0	0	0	0	0
tRNA-Met.1835	0	0	0	0	0	0
tRNA-Met.988	0	0	0	0	0	0
tRNA-Pro.1124	0	0	0	0	0	0
tRNA-Pro.734	0	0	0	0	0	0
tRNA-Pro.985	0	0	0	0	0	0
tRNA-Ser.1505	0	0	0	0	0	0
tRNA-Ser.980	0	0	3.42432	6.06248	0	13.2233
tRNA-Thr.1745	0	0	0	0	0	0
tRNA-Thr.522	0	0	0	0	0	0
tRNA-Trp.762	0	0	0	0	0	0
tRNA-Trp.771	0	0	0	0	0	0
tRNA-Trp.983	0	0	0	0	0	0
tRNA-Tyr.978	0	0	0	0	0	0
tRNA-Val.9	0	0	0	0	0	0
tRNA-Val.984	0	0	0	0	0	0
tRNA.100	0	0	0	0	0	0
tRNA.1000	0	0	0	0	0	0
tRNA.1001	0	0	0	0	0	0
tRNA.1003	0	0	0	0	0	0
tRNA.1004	0	0	0	0	0	0
tRNA.101	0	0	0	0	0	0
tRNA.1015	0	0	0	0	0	0
tRNA.1018	0	0	0	0	0	0
tRNA.1032	0	0	0	0	0	0
tRNA.1043	0	0	0	0	0	0
tRNA.1046	0	0	0	0	0	0
tRNA.1049	0	0	0	0	0	0
tRNA.1059	0	0	0	0	0	0
tRNA.1071	0	0	0	0	0	0
tRNA.1072	0	0	0	0	0	0
tRNA.1074	0	0	0	0	0	0
tRNA.1075	0	0	0	0	0	0
tRNA.1078	0	0	0	0	0	0
tRNA.1089	0	0	0	0	0	0
tRNA.1090	0	0	0	0	0	0
tRNA.110	0	0	0	0	0	0
tRNA.1111	0	0	0	0	0	0
tRNA.1117	0	0	0	0	0	0
tRNA.1118	0	0	0	0	0	0
tRNA.1120	0	0	0	0	0	0
tRNA.1125	0	0	0	0	0	0
tRNA.1128	0	0	0	0	0	0
tRNA.1136	0	0	0	0	0	0
tRNA.1144	0	0	0	0	0	0
tRNA.1145	0	0	0	0	0	0
tRNA.1154	3.70631	0	0	0	0	0
tRNA.1162	0	0	0	0	0	0
tRNA.1168	0	0	0	0	0	0
tRNA.1169	3.70631	0	6.75352	5.97828	0	0
tRNA.117	0	0	0	0	0	0
tRNA.1190	0	0	0	0	0	0
tRNA.1202	0	0	0	0	0	0
tRNA.1213	0	0	0	0	0	0
tRNA.1218	0	0	0	0	0	0
tRNA.1224	0	0	0	0	0	0
tRNA.123	0	0	0	0	0	0
tRNA.1249	0	0	0	0	0	0
tRNA.1250	0	0	0	0	0	0
tRNA.1252	0	0	0	0	0	0
tRNA.1257	0	0	0	0	0	0
tRNA.1262	0	0	0	0	0	0
tRNA.1267	0	0	0	0	0	0
tRNA.1269	0	0	0	0	0	0
tRNA.1270	0	0	0	0	0	0
tRNA.1271	0	0	0	0	0	0
tRNA.1288	0	0	0	0	0	0
tRNA.1310	0	0	0	0	0	0
tRNA.1330	0	0	0	0	0	0
tRNA.1342	0	0	0	0	0	0
tRNA.135	0	0	0	0	0	0
tRNA.1365	0	0	0	0	0	0
tRNA.1384	0	0	0	0	0	0
tRNA.139	0	0	0	0	0	0
tRNA.1392	0	0	0	0	0	0
tRNA.1396	0	0	0	0	0	0
tRNA.1398	0	0	0	0	0	0
tRNA.1417	0	0	0	0	0	0
tRNA.1420	0	0	0	5.89638	0	0
tRNA.1422	0	0	0	0	0	0
tRNA.1448	0	0	0	0	0	0
tRNA.1459	0	0	0	0	0	0
tRNA.1466	0	0	0	0	0	0
tRNA.1468	0	0	0	0	0	0
tRNA.1469	0	0	0	0	0	0
tRNA.147	0	0	0	0	0	0
tRNA.1471	0	0	0	0	0	0
tRNA.1493	0	0	0	0	0	0
tRNA.1498	0	0	0	0	0	0
tRNA.1500	0	0	0	0	0	0
tRNA.1519	0	0	0	0	0	0
tRNA.152	0	0	0	0	0	0
tRNA.1531	0	0	0	0	0	0
tRNA.1545	0	0	0	0	0	0
tRNA.1547	0	0	0	0	0	0
tRNA.1550	0	0	0	0	0	0
tRNA.1556	0	0	0	0	0	0
tRNA.1558	0	0	0	0	0	0
tRNA.1566	0	0	0	0	0	0
tRNA.1568	0	0	0	0	0	0
tRNA.1573	0	0	0	0	0	0
tRNA.1589	0	0	0	0	0	0
tRNA.1595	0	0	0	0	0	0
tRNA.1599	0	0	0	0	0	0
tRNA.16	0	0	0	0	0	0
tRNA.1603	0	0	0	0	0	0
tRNA.1606	0	0	0	0	0	0
tRNA.1607	0	0	0	0	0	0
tRNA.1608	0	0	0	0	0	0
tRNA.1610	0	0	0	0	0	0
tRNA.1614	0	0	0	0	0	0
tRNA.1615	0	0	0	0	0	0
tRNA.1631	0	0	0	0	0	0
tRNA.1642	0	0	0	0	0	0
tRNA.1645	0	0	0	0	0	0
tRNA.1646	0	0	0	0	0	0
tRNA.1647	0	0	0	0	0	0
tRNA.1648	0	0	0	0	0	0
tRNA.1649	0	0	0	0	0	0
tRNA.1650	0	0	0	0	0	0
tRNA.1651	0	0	0	0	0	0
tRNA.1652	0	0	0	0	0	0
tRNA.1678	0	0	0	0	0	0
tRNA.1692	0	0	0	0	0	0
tRNA.1696	0	0	0	0	0	0
tRNA.1698	0	0	0	0	0	0
tRNA.1701	0	0	0	0	0	0
tRNA.1702	0	0	0	0	0	0
tRNA.1708	0	0	0	0	0	0
tRNA.1714	0	0	0	0	0	0
tRNA.1719	0	0	0	0	0	0
tRNA.172	0	0	0	0	0	0
tRNA.1721	0	0	0	0	0	0
tRNA.1723	0	0	0	0	0	0
tRNA.1729	0	0	0	0	0	0
tRNA.173	0	0	0	0	0	0
tRNA.1748	0	0	0	0	0	0
tRNA.1749	0	0	0	0	0	0
tRNA.1757	0	0	0	0	0	0
tRNA.1766	0	0	0	0	0	0
tRNA.1767	0	0	0	0	0	0
tRNA.177	0	0	0	0	0	0
tRNA.1770	0	0	0	0	0	0
tRNA.1776	0	0	0	0	0	0
tRNA.1784	0	0	0	0	0	0
tRNA.1798	0	0	0	0	0	0
tRNA.1803	0	0	0	0	0	0
tRNA.1806	0	0	0	0	0	0
tRNA.1809	0	0	0	0	0	0
tRNA.1817	0	0	0	0	0	0
tRNA.1819	0	0	0	0	0	0
tRNA.1826	0	0	0	0	0	0
tRNA.1828	0	0	0	0	0	0
tRNA.1831	0	0	0	0	0	0
tRNA.184	0	0	0	0	0	0
tRNA.1855	0	0	0	0	0	0
tRNA.1856	0	0	0	0	0	0
tRNA.1868	0	0	0	0	0	0
tRNA.1887	0	0	0	0	0	0
tRNA.1895	0	0	0	0	0	0
tRNA.1909	0	0	0	0	0	0
tRNA.1910	0	0	0	0	0	0
tRNA.1923	0	0	0	0	0	0
tRNA.1928	0	0	0	0	0	0
tRNA.1935	0	0	0	0	0	0
tRNA.1948	0	0	0	0	0	0
tRNA.1953	0	0	0	0	0	0
tRNA.1954	0	0	0	0	0	0
tRNA.1955	0	0	0	0	0	0
tRNA.1959	0	0	0	0	0	0
tRNA.1960	0	0	0	0	0	0
tRNA.1967	0	0	0	0	0	0
tRNA.1969	0	0	0	0	0	0
tRNA.1971	0	0	0	0	0	0
tRNA.1978	0	0	0	0	0	0
tRNA.2	0	0	0	0	0	0
tRNA.208	0	0	0	0	0	0
tRNA.21	0	3.02457	0	0	0	0
tRNA.213	0	0	0	0	0	0
tRNA.219	0	0	0	0	0	0
tRNA.22	0	0	0	0	0	0
tRNA.220	0	0	0	0	0	0
tRNA.221	0	0	0	0	0	0
tRNA.222	0	0	0	0	0	0
tRNA.224	0	0	0	0	0	0
tRNA.225	0	0	0	0	0	0
tRNA.227	0	0	0	0	0	0
tRNA.231	0	0	0	0	0	0
tRNA.232	0	0	0	0	0	0
tRNA.233	0	0	0	0	0	0
tRNA.234	0	0	0	0	0	0
tRNA.235	0	0	0	0	0	0
tRNA.236	0	0	0	0	0	0
tRNA.237	0	0	0	0	0	0
tRNA.24	0	0	0	0	0	0
tRNA.250	0	0	0	0	0	0
tRNA.254	0	0	0	0	0	0
tRNA.256	0	0	0	0	0	0
tRNA.259	0	0	0	0	0	0
tRNA.266	0	0	0	0	0	0
tRNA.268	0	0	0	0	0	0
tRNA.27	0	0	0	0	0	0
tRNA.272	0	0	0	0	0	0
tRNA.277	0	0	0	0	0	0
tRNA.278	0	0	0	0	0	0
tRNA.279	0	0	0	0	0	0
tRNA.287	0	0	0	0	0	0
tRNA.288	0	0	0	0	0	0
tRNA.295	0	0	0	0	0	0
tRNA.302	0	0	0	0	0	0
tRNA.31	0	0	0	0	0	0
tRNA.317	0	0	0	0	0	0
tRNA.318	0	0	0	0	0	0
tRNA.324	0	0	0	0	0	0
tRNA.325	0	0	0	0	0	0
tRNA.326	0	0	0	0	0	0
tRNA.327	0	0	0	0	0	0
tRNA.328	0	0	0	0	0	0
tRNA.346	0	0	0	0	0	0
tRNA.35	0	0	0	0	0	0
tRNA.351	0	0	0	0	0	0
tRNA.352	0	0	0	0	0	0
tRNA.355	0	0	0	0	0	0
tRNA.356	0	9.07371	10.1303	0	0	0
tRNA.357	0	0	0	0	0	0
tRNA.36	0	0	0	0	0	0
tRNA.374	0	0	0	0	0	0
tRNA.375	0	0	0	0	0	0
tRNA.376	0	0	0	0	0	0
tRNA.379	0	0	0	0	0	0
tRNA.381	0	0	0	0	0	0
tRNA.389	0	0	0	0	0	0
tRNA.391	0	0	0	0	0	0
tRNA.392	0	0	0	0	0	0
tRNA.395	0	0	0	0	0	0
tRNA.422	0	0	0	0	0	0
tRNA.424	0	0	0	0	0	0
tRNA.437	0	0	0	0	0	0
tRNA.44	0	0	0	0	0	0
tRNA.440	0	0	0	0	0	0
tRNA.442	0	0	0	0	0	0
tRNA.443	0	0	0	0	0	0
tRNA.448	0	0	0	0	0	0
tRNA.449	0	0	0	0	0	0
tRNA.455	0	0	0	0	0	0
tRNA.456	0	0	0	0	0	0
tRNA.457	0	0	0	0	0	0
tRNA.458	0	0	0	0	0	0
tRNA.459	0	0	0	0	0	0
tRNA.46	0	0	0	0	0	0
tRNA.460	0	0	0	0	0	0
tRNA.462	0	0	0	0	0	0
tRNA.464	0	0	0	0	0	0
tRNA.465	0	0	0	0	0	0
tRNA.467	0	0	0	0	0	0
tRNA.49	0	0	0	0	0	0
tRNA.493	0	0	0	0	0	0
tRNA.50	0	0	0	0	0	0
tRNA.509	0	0	0	0	0	0
tRNA.512	0	0	0	0	0	0
tRNA.52	0	0	0	0	0	0
tRNA.528	0	0	0	0	0	0
tRNA.53	0	0	0	0	0	13.4122
tRNA.530	0	0	0	0	0	0
tRNA.533	0	0	0	0	0	0
tRNA.534	0	0	0	0	0	0
tRNA.536	0	0	0	0	0	0
tRNA.537	0	0	0	0	0	0
tRNA.553	0	0	0	0	0	0
tRNA.563	0	0	0	0	0	0
tRNA.573	0	0	0	0	0	0
tRNA.575	0	0	0	0	0	0
tRNA.585	0	0	0	0	0	0
tRNA.595	0	0	0	0	0	0
tRNA.596	0	0	0	0	0	0
tRNA.602	0	0	0	0	0	0
tRNA.607	0	0	0	0	0	0
tRNA.614	0	0	0	0	0	0
tRNA.615	0	0	0	0	0	0
tRNA.625	0	0	0	0	0	0
tRNA.631	0	0	0	5.12424	0	0
tRNA.633	0	0	0	0	0	0
tRNA.634	0	0	0	0	0	0
tRNA.636	0	0	0	0	0	0
tRNA.643	0	0	0	0	0	0
tRNA.645	0	0	0	0	0	0
tRNA.650	0	0	0	0	0	0
tRNA.657	0	0	3.3305	0	0	0
tRNA.683	0	0	0	0	0	6.51983
tRNA.693	0	0	0	0	0	0
tRNA.70	0	0	0	0	0	0
tRNA.71	0	0	0	0	0	0
tRNA.719	0	0	0	0	0	0
tRNA.720	0	0	0	0	0	0
tRNA.722	0	0	0	0	0	0
tRNA.727	0	0	0	0	0	0
tRNA.728	0	0	0	0	0	0
tRNA.735	0	0	0	0	0	0
tRNA.739	0	0	0	0	0	0
tRNA.747	0	0	0	0	0	0
tRNA.750	0	0	0	0	0	0
tRNA.751	0	0	0	0	0	0
tRNA.753	0	0	0	0	0	0
tRNA.754	0	0	0	0	0	0
tRNA.755	0	0	0	0	0	0
tRNA.760	0	0	0	0	0	0
tRNA.764	3.25432	0	5.92992	0	0	11.4495
tRNA.772	0	0	0	0	0	0
tRNA.776	0	0	0	0	0	0
tRNA.777	0	0	0	0	0	0
tRNA.794	0	0	0	0	0	0
tRNA.795	0	0	0	0	0	0
tRNA.796	0	0	0	0	0	0
tRNA.798	0	0	0	0	0	0
tRNA.8	0	0	0	0	0	0
tRNA.819	0	0	0	0	0	0
tRNA.822	0	0	0	0	0	0
tRNA.825	0	0	0	0	0	0
tRNA.826	0	0	0	0	0	0
tRNA.838	0	0	0	0	0	0
tRNA.843	0	0	0	0	0	0
tRNA.845	0	0	0	0	0	0
tRNA.847	0	0	0	0	0	0
tRNA.858	0	0	0	0	0	0
tRNA.863	0	0	0	0	0	0
tRNA.868	0	0	0	0	0	0
tRNA.882	0	0	0	0	0	0
tRNA.884	0	0	0	0	0	0
tRNA.888	0	0	0	0	0	0
tRNA.894	0	0	0	0	0	0
tRNA.898	0	0	0	0	0	0
tRNA.899	0	0	0	0	0	0
tRNA.902	0	0	0	0	0	0
tRNA.907	0	0	0	0	0	0
tRNA.914	0	0	0	0	0	0
tRNA.93	0	0	0	0	0	0
tRNA.94	0	0	0	0	0	0
tRNA.947	0	0	0	0	0	0
tRNA.956	0	0	0	0	0	0
tRNA.958	0	0	0	0	0	0
tRNA.959	0	0	0	0	0	0
tRNA.96	0	0	0	0	0	0
tRNA.961	0	0	0	0	0	0
tRNA.963	0	0	0	0	0	0
tRNA.964	0	0	0	0	0	0
tRNA.969	0	0	0	0	0	0
tRNA.98	0	0	0	0	0	0
tRNA.99	0	0	0	0	0	0
tRNA.994	0	0	0	0	0	0
tRNA.995	0	0	0	0	0	0
tRNA.998	0	0	0	0	0	0
tRNA.999	0	0	0	0	0	0
