# Supplementary material for: Identification of Novel Genes and Proteoforms in Angiostrongylus costaricensis through a Proteogenomic Approach
Source: Pathogens. 2022 Oct 31;11(11):1273. doi: 10.3390/pathogens11111273 (PMC9694666; doi:10.3390/pathogens11111273)
Supplement: Supplementary file 1 [file pathogens-11-01273-s001.zip › Supplemental_Data_S7.xlsx]

## Sheet: GO
Supplemental Data S7. Top 10 Gene Ontology (GO) terms by the 4th level
GO Type	GO ID	GO description	Protein ID
Biological Process	GO:0043170	macromolecule metabolic process	MSTRG.11971.1
Biological Process	GO:0043170	macromolecule metabolic process	transcript_ACOC_0000573801-mRNA-1
Biological Process	GO:0043170	macromolecule metabolic process	transcript_ACOC_0001055301-mRNA-1
Biological Process	GO:0043170	macromolecule metabolic process	transcript_ACOC_0000035201-mRNA-1
Biological Process	GO:0043170	macromolecule metabolic process	MSTRG.1859.5
Biological Process	GO:0043170	macromolecule metabolic process	MSTRG.1859.4
Biological Process	GO:0043170	macromolecule metabolic process	MSTRG.3620.1
Biological Process	GO:0043170	macromolecule metabolic process	MSTRG.1859.3
Biological Process	GO:0043170	macromolecule metabolic process	MSTRG.6262.1
Biological Process	GO:0043170	macromolecule metabolic process	transcript_ACOC_0000967601-mRNA-1
Biological Process	GO:0043170	macromolecule metabolic process	MSTRG.1859.1
Biological Process	GO:0043170	macromolecule metabolic process	MSTRG.216.1
Biological Process	GO:0043170	macromolecule metabolic process	MSTRG.1922.1
Biological Process	GO:0043170	macromolecule metabolic process	transcript_ACOC_0000700001-mRNA-1
Biological Process	GO:0043170	macromolecule metabolic process	MSTRG.2866.1
Biological Process	GO:0043170	macromolecule metabolic process	transcript_ACOC_0000441401-mRNA-1
Biological Process	GO:0043170	macromolecule metabolic process	transcript_ACOC_0000290601-mRNA-1
Biological Process	GO:0043170	macromolecule metabolic process	transcript_ACOC_0000127901-mRNA-1
Biological Process	GO:0043170	macromolecule metabolic process	transcript_ACOC_0000709401-mRNA-1
Biological Process	GO:0043170	macromolecule metabolic process	transcript_ACOC_0000829001-mRNA-1
Biological Process	GO:0043170	macromolecule metabolic process	MSTRG.9506.2
Biological Process	GO:0043170	macromolecule metabolic process	MSTRG.4368.1
Biological Process	GO:0043170	macromolecule metabolic process	MSTRG.12782.1
Biological Process	GO:0043170	macromolecule metabolic process	MSTRG.1343.3
Biological Process	GO:0043170	macromolecule metabolic process	transcript_ACOC_0000770501-mRNA-1
Biological Process	GO:0043170	macromolecule metabolic process	MSTRG.6525.2
Biological Process	GO:0043170	macromolecule metabolic process	MSTRG.6525.1
Biological Process	GO:0043170	macromolecule metabolic process	transcript_ACOC_0001184901-mRNA-1
Biological Process	GO:0043170	macromolecule metabolic process	MSTRG.4827.1
Biological Process	GO:0043170	macromolecule metabolic process	MSTRG.39.2
Biological Process	GO:0043170	macromolecule metabolic process	MSTRG.39.1
Biological Process	GO:0043170	macromolecule metabolic process	transcript_ACOC_0001012801-mRNA-1
Biological Process	GO:0043170	macromolecule metabolic process	transcript_ACOC_0000044201-mRNA-1
Biological Process	GO:0043170	macromolecule metabolic process	transcript_ACOC_0000500501-mRNA-1
Biological Process	GO:0043170	macromolecule metabolic process	transcript_ACOC_0000620101-mRNA-1
Biological Process	GO:0043170	macromolecule metabolic process	transcript_ACOC_0000493901-mRNA-1
Biological Process	GO:0043170	macromolecule metabolic process	MSTRG.7216.3
Biological Process	GO:0043170	macromolecule metabolic process	MSTRG.2999.2
Biological Process	GO:0043170	macromolecule metabolic process	MSTRG.2999.1
Biological Process	GO:0043170	macromolecule metabolic process	transcript_ACOC_0000481101-mRNA-1
Biological Process	GO:0043170	macromolecule metabolic process	MSTRG.9879.2
Biological Process	GO:0043170	macromolecule metabolic process	MSTRG.12466.2
Biological Process	GO:0043170	macromolecule metabolic process	MSTRG.9879.1
Biological Process	GO:0043170	macromolecule metabolic process	MSTRG.7216.2
Biological Process	GO:0043170	macromolecule metabolic process	MSTRG.7216.1
Biological Process	GO:0043170	macromolecule metabolic process	MSTRG.92.1
Biological Process	GO:0043170	macromolecule metabolic process	MSTRG.2034.2
Biological Process	GO:0043170	macromolecule metabolic process	MSTRG.4697.1
Biological Process	GO:0043170	macromolecule metabolic process	MSTRG.8093.1
Biological Process	GO:0043170	macromolecule metabolic process	transcript_ACOC_0000552001-mRNA-1
Biological Process	GO:0043170	macromolecule metabolic process	transcript_ACOC_0000912301-mRNA-1
Biological Process	GO:0043170	macromolecule metabolic process	MSTRG.7336.1
Biological Process	GO:0043170	macromolecule metabolic process	transcript_ACOC_0000943001-mRNA-1
Biological Process	GO:0043170	macromolecule metabolic process	transcript_ACOC_0000872101-mRNA-1
Biological Process	GO:0043170	macromolecule metabolic process	MSTRG.9702.1
Biological Process	GO:0043170	macromolecule metabolic process	transcript_ACOC_0001000001-mRNA-1
Biological Process	GO:0043170	macromolecule metabolic process	MSTRG.10528.2
Biological Process	GO:0043170	macromolecule metabolic process	MSTRG.10528.1
Biological Process	GO:0043170	macromolecule metabolic process	transcript_ACOC_0000001701-mRNA-1
Biological Process	GO:0043170	macromolecule metabolic process	transcript_ACOC_0000281601-mRNA-1
Biological Process	GO:0043170	macromolecule metabolic process	transcript_ACOC_0001261001-mRNA-1
Biological Process	GO:0043170	macromolecule metabolic process	transcript_ACOC_0000235701-mRNA-1
Biological Process	GO:0043170	macromolecule metabolic process	MSTRG.2274.1
Biological Process	GO:0043170	macromolecule metabolic process	transcript_ACOC_0001095001-mRNA-1
Biological Process	GO:0043170	macromolecule metabolic process	MSTRG.11076.1
Biological Process	GO:0043170	macromolecule metabolic process	transcript_ACOC_0000564801-mRNA-1
Biological Process	GO:0043170	macromolecule metabolic process	transcript_ACOC_0000327401-mRNA-1
Biological Process	GO:0043170	macromolecule metabolic process	MSTRG.11579.1
Biological Process	GO:0043170	macromolecule metabolic process	MSTRG.8792.1
Biological Process	GO:0043170	macromolecule metabolic process	MSTRG.4893.2
Biological Process	GO:0043170	macromolecule metabolic process	transcript_ACOC_0000703801-mRNA-1
Biological Process	GO:0043170	macromolecule metabolic process	transcript_ACOC_0000509901-mRNA-1
Biological Process	GO:0043170	macromolecule metabolic process	MSTRG.3740.1
Biological Process	GO:0043170	macromolecule metabolic process	MSTRG.10635.1
Biological Process	GO:0043170	macromolecule metabolic process	MSTRG.10189.1
Biological Process	GO:0043170	macromolecule metabolic process	MSTRG.6275.1
Biological Process	GO:0043170	macromolecule metabolic process	transcript_ACOC_0000306601-mRNA-1
Biological Process	GO:0043170	macromolecule metabolic process	transcript_ACOC_0000259301-mRNA-1
Biological Process	GO:0043170	macromolecule metabolic process	transcript_ACOC_0000191801-mRNA-1
Biological Process	GO:0043170	macromolecule metabolic process	transcript_ACOC_0001058101-mRNA-1
Biological Process	GO:0043170	macromolecule metabolic process	transcript_ACOC_0000699001-mRNA-1
Biological Process	GO:0043170	macromolecule metabolic process	transcript_ACOC_0000388901-mRNA-1
Biological Process	GO:0043170	macromolecule metabolic process	MSTRG.13037.1
Biological Process	GO:0043170	macromolecule metabolic process	MSTRG.7915.1
Biological Process	GO:0043170	macromolecule metabolic process	MSTRG.5780.1
Biological Process	GO:0043170	macromolecule metabolic process	transcript_ACOC_0001190101-mRNA-1
Biological Process	GO:0043170	macromolecule metabolic process	MSTRG.7915.2
Biological Process	GO:0043170	macromolecule metabolic process	transcript_ACOC_0000988401-mRNA-1
Biological Process	GO:0043170	macromolecule metabolic process	MSTRG.4707.1
Biological Process	GO:0043170	macromolecule metabolic process	transcript_ACOC_0001129001-mRNA-1
Biological Process	GO:0043170	macromolecule metabolic process	transcript_ACOC_0001270001-mRNA-1
Biological Process	GO:0043170	macromolecule metabolic process	MSTRG.7060.1
Biological Process	GO:0043170	macromolecule metabolic process	MSTRG.6930.1
Biological Process	GO:0043170	macromolecule metabolic process	transcript_ACOC_0001285601-mRNA-1
Biological Process	GO:0043170	macromolecule metabolic process	transcript_ACOC_0000078701-mRNA-1
Biological Process	GO:0043170	macromolecule metabolic process	transcript_ACOC_0000617701-mRNA-1
Biological Process	GO:0043170	macromolecule metabolic process	MSTRG.2363.1
Biological Process	GO:0043170	macromolecule metabolic process	MSTRG.2759.1
Biological Process	GO:0043170	macromolecule metabolic process	MSTRG.3348.1
Biological Process	GO:0043170	macromolecule metabolic process	transcript_ACOC_0000391301-mRNA-1
Biological Process	GO:0043170	macromolecule metabolic process	MSTRG.7772.1
Biological Process	GO:0043170	macromolecule metabolic process	MSTRG.9572.1
Biological Process	GO:0043170	macromolecule metabolic process	transcript_ACOC_0000533101-mRNA-1
Biological Process	GO:0043170	macromolecule metabolic process	transcript_ACOC_0000478701-mRNA-1
Biological Process	GO:0043170	macromolecule metabolic process	MSTRG.11668.1
Biological Process	GO:0043170	macromolecule metabolic process	MSTRG.12200.2
Biological Process	GO:0043170	macromolecule metabolic process	MSTRG.678.1
Biological Process	GO:0043170	macromolecule metabolic process	transcript_ACOC_0000060301-mRNA-1
Biological Process	GO:0043170	macromolecule metabolic process	MSTRG.6418.1
Biological Process	GO:0043170	macromolecule metabolic process	transcript_ACOC_0001283701-mRNA-1
Biological Process	GO:0043170	macromolecule metabolic process	MSTRG.4551.1
Biological Process	GO:0043170	macromolecule metabolic process	MSTRG.8726.1
Biological Process	GO:0043170	macromolecule metabolic process	MSTRG.11272.1
Biological Process	GO:0043170	macromolecule metabolic process	MSTRG.5148.1
Biological Process	GO:0043170	macromolecule metabolic process	MSTRG.8726.2
Biological Process	GO:0043170	macromolecule metabolic process	transcript_ACOC_0000420601-mRNA-1
Biological Process	GO:0043170	macromolecule metabolic process	transcript_ACOC_0000924101-mRNA-1
Biological Process	GO:0043170	macromolecule metabolic process	transcript_ACOC_0000202101-mRNA-1
Biological Process	GO:0043170	macromolecule metabolic process	transcript_ACOC_0000674501-mRNA-1
Biological Process	GO:0043170	macromolecule metabolic process	transcript_ACOC_0001245901-mRNA-1
Biological Process	GO:0043170	macromolecule metabolic process	MSTRG.2496.1
Biological Process	GO:0043170	macromolecule metabolic process	transcript_ACOC_0000853201-mRNA-1
Biological Process	GO:0043170	macromolecule metabolic process	MSTRG.3085.1
Biological Process	GO:0043170	macromolecule metabolic process	transcript_ACOC_0000933101-mRNA-1
Biological Process	GO:0043170	macromolecule metabolic process	transcript_ACOC_0000411601-mRNA-1
Biological Process	GO:0043170	macromolecule metabolic process	MSTRG.10265.3
Biological Process	GO:0043170	macromolecule metabolic process	transcript_ACOC_0000232901-mRNA-1
Biological Process	GO:0043170	macromolecule metabolic process	MSTRG.10265.2
Biological Process	GO:0043170	macromolecule metabolic process	MSTRG.5607.1
Biological Process	GO:0043170	macromolecule metabolic process	transcript_ACOC_0000869701-mRNA-1
Biological Process	GO:0043170	macromolecule metabolic process	transcript_ACOC_0000056001-mRNA-1
Biological Process	GO:0043170	macromolecule metabolic process	MSTRG.10679.1
Biological Process	GO:0043170	macromolecule metabolic process	MSTRG.12795.1
Biological Process	GO:0043170	macromolecule metabolic process	MSTRG.10679.2
Biological Process	GO:0043170	macromolecule metabolic process	transcript_ACOC_0001273801-mRNA-1
Biological Process	GO:0043170	macromolecule metabolic process	transcript_ACOC_0000284401-mRNA-1
Biological Process	GO:0043170	macromolecule metabolic process	MSTRG.5597.1
Biological Process	GO:0043170	macromolecule metabolic process	MSTRG.9243.1
Biological Process	GO:0043170	macromolecule metabolic process	transcript_ACOC_0000302901-mRNA-1
Biological Process	GO:0043170	macromolecule metabolic process	transcript_ACOC_0000752501-mRNA-1
Biological Process	GO:0043170	macromolecule metabolic process	transcript_ACOC_0000423401-mRNA-1
Biological Process	GO:0043170	macromolecule metabolic process	transcript_ACOC_0000937801-mRNA-1
Biological Process	GO:0043170	macromolecule metabolic process	MSTRG.6591.1
Biological Process	GO:0043170	macromolecule metabolic process	MSTRG.1236.1
Biological Process	GO:0043170	macromolecule metabolic process	MSTRG.4947.1
Biological Process	GO:0043170	macromolecule metabolic process	transcript_ACOC_0001249601-mRNA-1
Biological Process	GO:0043170	macromolecule metabolic process	transcript_ACOC_0001068001-mRNA-1
Biological Process	GO:0043170	macromolecule metabolic process	MSTRG.2692.1
Biological Process	GO:0043170	macromolecule metabolic process	transcript_ACOC_0000382301-mRNA-1
Biological Process	GO:0043170	macromolecule metabolic process	transcript_ACOC_0000684401-mRNA-1
Biological Process	GO:0043170	macromolecule metabolic process	transcript_ACOC_0000069701-mRNA-1
Biological Process	GO:0043170	macromolecule metabolic process	MSTRG.2230.1
Biological Process	GO:0043170	macromolecule metabolic process	transcript_ACOC_0000702901-mRNA-1
Biological Process	GO:0043170	macromolecule metabolic process	transcript_ACOC_0000234801-mRNA-1
Biological Process	GO:0043170	macromolecule metabolic process	MSTRG.6734.1
Biological Process	GO:0043170	macromolecule metabolic process	MSTRG.336.1
Biological Process	GO:0043170	macromolecule metabolic process	MSTRG.1369.1
Biological Process	GO:0043170	macromolecule metabolic process	MSTRG.3753.2
Biological Process	GO:0043170	macromolecule metabolic process	MSTRG.4342.1
Biological Process	GO:0043170	macromolecule metabolic process	transcript_ACOC_0000797901-mRNA-1
Biological Process	GO:0043170	macromolecule metabolic process	transcript_ACOC_0000936901-mRNA-1
Biological Process	GO:0043170	macromolecule metabolic process	transcript_ACOC_0000426201-mRNA-1
Biological Process	GO:0043170	macromolecule metabolic process	MSTRG.10012.1
Biological Process	GO:0043170	macromolecule metabolic process	MSTRG.665.1
Biological Process	GO:0043170	macromolecule metabolic process	transcript_ACOC_0000090101-mRNA-1
Biological Process	GO:0043170	macromolecule metabolic process	MSTRG.665.3
Biological Process	GO:0043170	macromolecule metabolic process	MSTRG.1690.1
Biological Process	GO:0043170	macromolecule metabolic process	transcript_ACOC_0001246801-mRNA-1
Biological Process	GO:0043170	macromolecule metabolic process	transcript_ACOC_0000934001-mRNA-1
Biological Process	GO:0043170	macromolecule metabolic process	MSTRG.5268.1
Biological Process	GO:0043170	macromolecule metabolic process	MSTRG.9167.1
Biological Process	GO:0043170	macromolecule metabolic process	transcript_ACOC_0000510401-mRNA-1
Biological Process	GO:0043170	macromolecule metabolic process	MSTRG.367.1
Biological Process	GO:0043170	macromolecule metabolic process	transcript_ACOC_0000711901-mRNA-1
Biological Process	GO:0043170	macromolecule metabolic process	MSTRG.4982.1
Biological Process	GO:0043170	macromolecule metabolic process	MSTRG.6872.1
Biological Process	GO:0043170	macromolecule metabolic process	MSTRG.4982.3
Biological Process	GO:0043170	macromolecule metabolic process	MSTRG.5549.1
Biological Process	GO:0043170	macromolecule metabolic process	transcript_ACOC_0000757201-mRNA-1
Biological Process	GO:0043170	macromolecule metabolic process	MSTRG.6872.3
Biological Process	GO:0043170	macromolecule metabolic process	MSTRG.5153.3
Biological Process	GO:0043170	macromolecule metabolic process	MSTRG.5153.2
Biological Process	GO:0043170	macromolecule metabolic process	transcript_ACOC_0000498601-mRNA-1
Biological Process	GO:0043170	macromolecule metabolic process	transcript_ACOC_0000637601-mRNA-1
Biological Process	GO:0043170	macromolecule metabolic process	transcript_ACOC_0000113201-mRNA-1
Biological Process	GO:0043170	macromolecule metabolic process	transcript_ACOC_0001262901-mRNA-1
Biological Process	GO:0043170	macromolecule metabolic process	MSTRG.10087.2
Biological Process	GO:0043170	macromolecule metabolic process	MSTRG.9781.1
Biological Process	GO:0043170	macromolecule metabolic process	MSTRG.8521.1
Biological Process	GO:0043170	macromolecule metabolic process	transcript_ACOC_0000095801-mRNA-1
Biological Process	GO:0043170	macromolecule metabolic process	MSTRG.8062.1
Biological Process	GO:0043170	macromolecule metabolic process	transcript_ACOC_0000160101-mRNA-1
Biological Process	GO:0043170	macromolecule metabolic process	MSTRG.11300.2
Biological Process	GO:0043170	macromolecule metabolic process	MSTRG.61.1
Biological Process	GO:0043170	macromolecule metabolic process	MSTRG.114.1
Biological Process	GO:0043170	macromolecule metabolic process	transcript_ACOC_0000575701-mRNA-1
Biological Process	GO:0043170	macromolecule metabolic process	MSTRG.4786.1
Biological Process	GO:0043170	macromolecule metabolic process	MSTRG.2.1
Biological Process	GO:0043170	macromolecule metabolic process	MSTRG.6423.1
Biological Process	GO:0043170	macromolecule metabolic process	MSTRG.2123.1
Biological Process	GO:0043170	macromolecule metabolic process	transcript_ACOC_0001118101-mRNA-1
Biological Process	GO:0043170	macromolecule metabolic process	transcript_ACOC_0000425301-mRNA-1
Biological Process	GO:0043170	macromolecule metabolic process	transcript_ACOC_0000286301-mRNA-1
Biological Process	GO:0043170	macromolecule metabolic process	transcript_ACOC_0000305701-mRNA-1
Biological Process	GO:0043170	macromolecule metabolic process	MSTRG.9465.1
Biological Process	GO:0043170	macromolecule metabolic process	transcript_ACOC_0000166701-mRNA-1
Biological Process	GO:0043170	macromolecule metabolic process	transcript_ACOC_0000634801-mRNA-1
Biological Process	GO:0043170	macromolecule metabolic process	transcript_ACOC_0000968501-mRNA-1
Biological Process	GO:0043170	macromolecule metabolic process	MSTRG.1249.1
Biological Process	GO:0043170	macromolecule metabolic process	MSTRG.4786.3
Biological Process	GO:0043170	macromolecule metabolic process	transcript_ACOC_0000646601-mRNA-1
Biological Process	GO:0043170	macromolecule metabolic process	transcript_ACOC_0000566701-mRNA-1
Biological Process	GO:0043170	macromolecule metabolic process	MSTRG.6752.1
Biological Process	GO:0043170	macromolecule metabolic process	MSTRG.1877.1
Biological Process	GO:0043170	macromolecule metabolic process	MSTRG.550.1
Biological Process	GO:0043170	macromolecule metabolic process	MSTRG.11829.2
Biological Process	GO:0043170	macromolecule metabolic process	transcript_ACOC_0000677301-mRNA-1
Biological Process	GO:0043170	macromolecule metabolic process	MSTRG.11686.1
Biological Process	GO:0043170	macromolecule metabolic process	transcript_ACOC_0000565701-mRNA-1
Biological Process	GO:0043170	macromolecule metabolic process	MSTRG.11117.1
Biological Process	GO:0043170	macromolecule metabolic process	MSTRG.4390.1
Biological Process	GO:0043170	macromolecule metabolic process	transcript_ACOC_0000636601-mRNA-1
Biological Process	GO:0043170	macromolecule metabolic process	transcript_ACOC_0000775201-mRNA-1
Biological Process	GO:0043170	macromolecule metabolic process	MSTRG.11170.3
Biological Process	GO:0043170	macromolecule metabolic process	MSTRG.5803.1
Biological Process	GO:0043170	macromolecule metabolic process	MSTRG.11170.1
Biological Process	GO:0043170	macromolecule metabolic process	transcript_ACOC_0000822501-mRNA-1
Biological Process	GO:0043170	macromolecule metabolic process	transcript_ACOC_0000948701-mRNA-1
Biological Process	GO:0043170	macromolecule metabolic process	transcript_ACOC_0001074201-mRNA-1
Biological Process	GO:0043170	macromolecule metabolic process	MSTRG.2243.4
Biological Process	GO:0043170	macromolecule metabolic process	MSTRG.6316.1
Biological Process	GO:0043170	macromolecule metabolic process	MSTRG.9029.1
Biological Process	GO:0043170	macromolecule metabolic process	MSTRG.8833.2
Biological Process	GO:0043170	macromolecule metabolic process	transcript_ACOC_0000969501-mRNA-1
Biological Process	GO:0043170	macromolecule metabolic process	transcript_ACOC_0001239701-mRNA-1
Biological Process	GO:0043170	macromolecule metabolic process	transcript_ACOC_0000494801-mRNA-1
Biological Process	GO:0043170	macromolecule metabolic process	MSTRG.7234.1
Biological Process	GO:0043170	macromolecule metabolic process	transcript_ACOC_0000233801-mRNA-1
Biological Process	GO:0043170	macromolecule metabolic process	transcript_ACOC_0000311901-mRNA-1
Biological Process	GO:0043170	macromolecule metabolic process	transcript_ACOC_0000443301-mRNA-1
Biological Process	GO:0043170	macromolecule metabolic process	transcript_ACOC_0000911401-mRNA-1
Biological Process	GO:0043170	macromolecule metabolic process	MSTRG.3396.1
Biological Process	GO:0043170	macromolecule metabolic process	MSTRG.6543.1
Biological Process	GO:0043170	macromolecule metabolic process	MSTRG.12111.1
Biological Process	GO:0043170	macromolecule metabolic process	MSTRG.2243.3
Biological Process	GO:0043170	macromolecule metabolic process	MSTRG.2243.1
Biological Process	GO:0043170	macromolecule metabolic process	transcript_ACOC_0000403601-mRNA-1
Biological Process	GO:0043170	macromolecule metabolic process	transcript_ACOC_0000264601-mRNA-1
Biological Process	GO:0043170	macromolecule metabolic process	MSTRG.5625.1
Biological Process	GO:0043170	macromolecule metabolic process	MSTRG.576.1
Biological Process	GO:0043170	macromolecule metabolic process	MSTRG.576.2
Biological Process	GO:0043170	macromolecule metabolic process	transcript_ACOC_0000269201-mRNA-1
Biological Process	GO:0043170	macromolecule metabolic process	transcript_ACOC_0000216801-mRNA-1
Biological Process	GO:0043170	macromolecule metabolic process	transcript_ACOC_0001075201-mRNA-1
Biological Process	GO:0043170	macromolecule metabolic process	transcript_ACOC_0001146101-mRNA-1
Biological Process	GO:0043170	macromolecule metabolic process	MSTRG.9990.1
Biological Process	GO:0043170	macromolecule metabolic process	transcript_ACOC_0000993701-mRNA-1
Biological Process	GO:0043170	macromolecule metabolic process	transcript_ACOC_0000077801-mRNA-1
Biological Process	GO:0043170	macromolecule metabolic process	transcript_ACOC_0000666401-mRNA-1
Biological Process	GO:0043170	macromolecule metabolic process	MSTRG.9990.3
Biological Process	GO:0043170	macromolecule metabolic process	transcript_ACOC_0001099701-mRNA-1
Biological Process	GO:0043170	macromolecule metabolic process	transcript_ACOC_0000806401-mRNA-1
Biological Process	GO:0043170	macromolecule metabolic process	MSTRG.10502.1
Biological Process	GO:0043170	macromolecule metabolic process	transcript_ACOC_0000009201-mRNA-1
Biological Process	GO:0043170	macromolecule metabolic process	MSTRG.10306.1
Biological Process	GO:0043170	macromolecule metabolic process	transcript_ACOC_0000196501-mRNA-1
Biological Process	GO:0043170	macromolecule metabolic process	MSTRG.10043.1
Biological Process	GO:0043170	macromolecule metabolic process	MSTRG.10043.2
Biological Process	GO:0043170	macromolecule metabolic process	transcript_ACOC_0000669201-mRNA-1
Biological Process	GO:0043170	macromolecule metabolic process	transcript_ACOC_0000415301-mRNA-1
Biological Process	GO:0043170	macromolecule metabolic process	MSTRG.4773.5
Biological Process	GO:0043170	macromolecule metabolic process	transcript_ACOC_0000406401-mRNA-1
Biological Process	GO:0043170	macromolecule metabolic process	MSTRG.3931.2
Biological Process	GO:0043170	macromolecule metabolic process	MSTRG.3931.1
Biological Process	GO:0043170	macromolecule metabolic process	MSTRG.11028.2
Biological Process	GO:0043170	macromolecule metabolic process	MSTRG.8624.1
Biological Process	GO:0043170	macromolecule metabolic process	MSTRG.7617.1
Biological Process	GO:0043170	macromolecule metabolic process	MSTRG.10439.2
Biological Process	GO:0043170	macromolecule metabolic process	MSTRG.2269.1
Biological Process	GO:0043170	macromolecule metabolic process	MSTRG.10724.1
Biological Process	GO:0043170	macromolecule metabolic process	MSTRG.4653.3
Biological Process	GO:0043170	macromolecule metabolic process	transcript_ACOC_0000192701-mRNA-1
Biological Process	GO:0043170	macromolecule metabolic process	MSTRG.1611.2
Biological Process	GO:0043170	macromolecule metabolic process	transcript_ACOC_0000199301-mRNA-1
Biological Process	GO:0043170	macromolecule metabolic process	transcript_ACOC_0000018101-mRNA-1
Biological Process	GO:0043170	macromolecule metabolic process	MSTRG.10492.1
Biological Process	GO:0043170	macromolecule metabolic process	MSTRG.1205.1
Biological Process	GO:0043170	macromolecule metabolic process	MSTRG.4653.2
Biological Process	GO:0043170	macromolecule metabolic process	MSTRG.4653.1
Biological Process	GO:0043170	macromolecule metabolic process	MSTRG.4916.2
Biological Process	GO:0043170	macromolecule metabolic process	transcript_ACOC_0001306801-mRNA-1
Biological Process	GO:0043170	macromolecule metabolic process	MSTRG.4916.3
Biological Process	GO:0043170	macromolecule metabolic process	transcript_ACOC_0000940201-mRNA-1
Biological Process	GO:0043170	macromolecule metabolic process	transcript_ACOC_0000418101-mRNA-1
Biological Process	GO:0043170	macromolecule metabolic process	transcript_ACOC_0000599301-mRNA-1
Biological Process	GO:0043170	macromolecule metabolic process	transcript_ACOC_0000629501-mRNA-1
Biological Process	GO:0043170	macromolecule metabolic process	transcript_ACOC_0000887701-mRNA-1
Biological Process	GO:0043170	macromolecule metabolic process	transcript_ACOC_0000150101-mRNA-1
Biological Process	GO:0043170	macromolecule metabolic process	transcript_ACOC_0000470301-mRNA-1
Biological Process	GO:0043170	macromolecule metabolic process	transcript_ACOC_0000331701-mRNA-1
Biological Process	GO:0043170	macromolecule metabolic process	MSTRG.6227.1
Biological Process	GO:0043170	macromolecule metabolic process	MSTRG.12836.1
Biological Process	GO:0043170	macromolecule metabolic process	MSTRG.5691.1
Biological Process	GO:0043170	macromolecule metabolic process	MSTRG.6436.1
Biological Process	GO:0043170	macromolecule metabolic process	transcript_ACOC_0001278401-mRNA-1
Biological Process	GO:0043170	macromolecule metabolic process	transcript_ACOC_0000999301-mRNA-1
Biological Process	GO:0043170	macromolecule metabolic process	transcript_ACOC_0001106401-mRNA-1
Biological Process	GO:0043170	macromolecule metabolic process	MSTRG.9136.2
Biological Process	GO:0043170	macromolecule metabolic process	transcript_ACOC_0000100501-mRNA-1
Biological Process	GO:0043170	macromolecule metabolic process	transcript_ACOC_0000845101-mRNA-1
Biological Process	GO:0043170	macromolecule metabolic process	MSTRG.9136.1
Biological Process	GO:0043170	macromolecule metabolic process	MSTRG.1731.3
Biological Process	GO:0043170	macromolecule metabolic process	transcript_ACOC_0000950101-mRNA-1
Biological Process	GO:0043170	macromolecule metabolic process	MSTRG.7474.1
Biological Process	GO:0043170	macromolecule metabolic process	transcript_ACOC_0000870301-mRNA-1
Biological Process	GO:0043170	macromolecule metabolic process	MSTRG.1731.2
Biological Process	GO:0043170	macromolecule metabolic process	MSTRG.3174.1
Biological Process	GO:0043170	macromolecule metabolic process	transcript_ACOC_0000541201-mRNA-1
Biological Process	GO:0043170	macromolecule metabolic process	transcript_ACOC_0000221001-mRNA-1
Biological Process	GO:0043170	macromolecule metabolic process	MSTRG.1391.1
Biological Process	GO:0043170	macromolecule metabolic process	MSTRG.1338.1
Biological Process	GO:0043170	macromolecule metabolic process	MSTRG.12680.1
Biological Process	GO:0043170	macromolecule metabolic process	MSTRG.7826.1
Biological Process	GO:0043170	macromolecule metabolic process	transcript_ACOC_0000045101-mRNA-1
Biological Process	GO:0043170	macromolecule metabolic process	transcript_ACOC_0000544001-mRNA-1
Biological Process	GO:0043170	macromolecule metabolic process	transcript_ACOC_0000473101-mRNA-1
Biological Process	GO:0043170	macromolecule metabolic process	transcript_ACOC_0000005401-mRNA-1
Biological Process	GO:0043170	macromolecule metabolic process	MSTRG.9674.1
Biological Process	GO:0043170	macromolecule metabolic process	MSTRG.6632.2
Biological Process	GO:0043170	macromolecule metabolic process	MSTRG.7550.1
Biological Process	GO:0043170	macromolecule metabolic process	MSTRG.9212.1
Biological Process	GO:0043170	macromolecule metabolic process	transcript_ACOC_0000337301-mRNA-1
Biological Process	GO:0043170	macromolecule metabolic process	MSTRG.4444.1
Biological Process	GO:0043170	macromolecule metabolic process	transcript_ACOC_0001260001-mRNA-1
Biological Process	GO:0043170	macromolecule metabolic process	MSTRG.11104.1
Biological Process	GO:0043170	macromolecule metabolic process	MSTRG.74.1
Biological Process	GO:0043170	macromolecule metabolic process	MSTRG.101.2
Biological Process	GO:0043170	macromolecule metabolic process	MSTRG.8075.1
Biological Process	GO:0043170	macromolecule metabolic process	MSTRG.74.2
Biological Process	GO:0043170	macromolecule metabolic process	transcript_ACOC_0001118201-mRNA-1
Biological Process	GO:0043170	macromolecule metabolic process	transcript_ACOC_0001202301-mRNA-1
Biological Process	GO:0043170	macromolecule metabolic process	MSTRG.8864.1
Biological Process	GO:0043170	macromolecule metabolic process	MSTRG.1851.1
Biological Process	GO:0043170	macromolecule metabolic process	transcript_ACOC_0000621101-mRNA-1
Biological Process	GO:0043170	macromolecule metabolic process	MSTRG.6138.3
Biological Process	GO:0043170	macromolecule metabolic process	transcript_ACOC_0000387901-mRNA-1
Biological Process	GO:0043170	macromolecule metabolic process	transcript_ACOC_0000030601-mRNA-1
Biological Process	GO:0043170	macromolecule metabolic process	transcript_ACOC_0000830601-mRNA-1
Biological Process	GO:0043170	macromolecule metabolic process	MSTRG.5522.1
Biological Process	GO:0043170	macromolecule metabolic process	MSTRG.2599.2
Biological Process	GO:0043170	macromolecule metabolic process	MSTRG.2599.1
Biological Process	GO:0043170	macromolecule metabolic process	MSTRG.8480.1
Biological Process	GO:0043170	macromolecule metabolic process	MSTRG.6138.2
Biological Process	GO:0043170	macromolecule metabolic process	MSTRG.6138.1
Biological Process	GO:0043170	macromolecule metabolic process	MSTRG.2346.1
Biological Process	GO:0043170	macromolecule metabolic process	MSTRG.12395.1
Biological Process	GO:0043170	macromolecule metabolic process	MSTRG.1218.1
Biological Process	GO:0043170	macromolecule metabolic process	MSTRG.12142.1
Biological Process	GO:0043170	macromolecule metabolic process	transcript_ACOC_0001014601-mRNA-1
Biological Process	GO:0043170	macromolecule metabolic process	MSTRG.7473.1
Biological Process	GO:0043170	macromolecule metabolic process	transcript_ACOC_0000772301-mRNA-1
Biological Process	GO:0043170	macromolecule metabolic process	transcript_ACOC_0000458801-mRNA-1
Biological Process	GO:0043170	macromolecule metabolic process	transcript_ACOC_0000230101-mRNA-1
Biological Process	GO:0043170	macromolecule metabolic process	MSTRG.11463.1
Biological Process	GO:0043170	macromolecule metabolic process	MSTRG.11463.2
Biological Process	GO:0043170	macromolecule metabolic process	transcript_ACOC_0000255501-mRNA-1
Biological Process	GO:0043170	macromolecule metabolic process	transcript_ACOC_0001259601-mRNA-1
Biological Process	GO:0043170	macromolecule metabolic process	transcript_ACOC_0000559601-mRNA-1
Biological Process	GO:0043170	macromolecule metabolic process	MSTRG.2479.1
Biological Process	GO:0043170	macromolecule metabolic process	MSTRG.277.1
Biological Process	GO:0043170	macromolecule metabolic process	MSTRG.1075.2
Biological Process	GO:0043170	macromolecule metabolic process	transcript_ACOC_0000279201-mRNA-1
Biological Process	GO:0043170	macromolecule metabolic process	MSTRG.1075.1
Biological Process	GO:0043170	macromolecule metabolic process	MSTRG.12079.1
Biological Process	GO:0043170	macromolecule metabolic process	MSTRG.3508.1
Biological Process	GO:0043170	macromolecule metabolic process	MSTRG.7593.1
Biological Process	GO:0043170	macromolecule metabolic process	MSTRG.8997.1
Biological Process	GO:0043170	macromolecule metabolic process	transcript_ACOC_0000535901-mRNA-1
Biological Process	GO:0043170	macromolecule metabolic process	transcript_ACOC_0001137001-mRNA-1
Biological Process	GO:0043170	macromolecule metabolic process	transcript_ACOC_0000291601-mRNA-1
Biological Process	GO:0043170	macromolecule metabolic process	transcript_ACOC_0000326401-mRNA-1
Biological Process	GO:0043170	macromolecule metabolic process	transcript_ACOC_0000301001-mRNA-1
Biological Process	GO:0043170	macromolecule metabolic process	MSTRG.3049.2
Biological Process	GO:0043170	macromolecule metabolic process	MSTRG.2675.1
Biological Process	GO:0043170	macromolecule metabolic process	MSTRG.8360.1
Biological Process	GO:0043170	macromolecule metabolic process	transcript_ACOC_0000513301-mRNA-1
Biological Process	GO:0043170	macromolecule metabolic process	transcript_ACOC_0000442401-mRNA-1
Biological Process	GO:0043170	macromolecule metabolic process	MSTRG.12066.1
Biological Process	GO:0043170	macromolecule metabolic process	MSTRG.8360.2
Biological Process	GO:0043170	macromolecule metabolic process	transcript_ACOC_0000209601-mRNA-1
Biological Process	GO:0043170	macromolecule metabolic process	MSTRG.4623.1
Biological Process	GO:0043170	macromolecule metabolic process	MSTRG.8360.3
Biological Process	GO:0043170	macromolecule metabolic process	transcript_ACOC_0000624901-mRNA-1
Biological Process	GO:0043170	macromolecule metabolic process	MSTRG.7397.1
Biological Process	GO:0043170	macromolecule metabolic process	MSTRG.1088.1
Biological Process	GO:0043170	macromolecule metabolic process	MSTRG.9479.2
Biological Process	GO:0043170	macromolecule metabolic process	transcript_ACOC_0001226001-mRNA-1
Biological Process	GO:0043170	macromolecule metabolic process	MSTRG.9479.1
Biological Process	GO:0043170	macromolecule metabolic process	transcript_ACOC_0001194901-mRNA-1
Biological Process	GO:0043170	macromolecule metabolic process	MSTRG.932.1
Biological Process	GO:0043170	macromolecule metabolic process	transcript_ACOC_0000517901-mRNA-1
Biological Process	GO:0043170	macromolecule metabolic process	MSTRG.11859.1
Biological Process	GO:0043170	macromolecule metabolic process	MSTRG.1522.2
Biological Process	GO:0043170	macromolecule metabolic process	MSTRG.157.1
Biological Process	GO:0043170	macromolecule metabolic process	MSTRG.1522.1
Biological Process	GO:0043170	macromolecule metabolic process	transcript_ACOC_0000796001-mRNA-1
Biological Process	GO:0043170	macromolecule metabolic process	MSTRG.6214.1
Biological Process	GO:0043170	macromolecule metabolic process	transcript_ACOC_0000753501-mRNA-1
Biological Process	GO:0043170	macromolecule metabolic process	MSTRG.12614.1
Biological Process	GO:0043170	macromolecule metabolic process	transcript_ACOC_0000393201-mRNA-1
Biological Process	GO:0043170	macromolecule metabolic process	transcript_ACOC_0001069901-mRNA-1
Biological Process	GO:0043170	macromolecule metabolic process	MSTRG.4427.1
Biological Process	GO:0043170	macromolecule metabolic process	transcript_ACOC_0000012501-mRNA-1
Biological Process	GO:0043170	macromolecule metabolic process	transcript_ACOC_0000774301-mRNA-1
Biological Process	GO:0043170	macromolecule metabolic process	MSTRG.7340.1
Biological Process	GO:0043170	macromolecule metabolic process	transcript_ACOC_0000203101-mRNA-1
Biological Process	GO:0043170	macromolecule metabolic process	MSTRG.5183.1
Biological Process	GO:0043170	macromolecule metabolic process	MSTRG.4427.2
Biological Process	GO:0043170	macromolecule metabolic process	transcript_ACOC_0000920301-mRNA-1
Biological Process	GO:0043170	macromolecule metabolic process	transcript_ACOC_0001068101-mRNA-1
Biological Process	GO:0043170	macromolecule metabolic process	transcript_ACOC_0000581801-mRNA-1
Biological Process	GO:0043170	macromolecule metabolic process	MSTRG.7749.2
Biological Process	GO:0043170	macromolecule metabolic process	transcript_ACOC_0001051501-mRNA-1
Biological Process	GO:0043170	macromolecule metabolic process	transcript_ACOC_0001265801-mRNA-1
Biological Process	GO:0043170	macromolecule metabolic process	transcript_ACOC_0000356301-mRNA-1
Biological Process	GO:0043170	macromolecule metabolic process	MSTRG.7749.1
Biological Process	GO:0043170	macromolecule metabolic process	MSTRG.1579.1
Biological Process	GO:0043170	macromolecule metabolic process	MSTRG.6770.1
Biological Process	GO:0043170	macromolecule metabolic process	transcript_ACOC_0000320801-mRNA-1
Biological Process	GO:0043170	macromolecule metabolic process	MSTRG.30.1
Biological Process	GO:0043170	macromolecule metabolic process	MSTRG.5050.1
Biological Process	GO:0043170	macromolecule metabolic process	transcript_ACOC_0000645701-mRNA-1
Biological Process	GO:0043170	macromolecule metabolic process	transcript_ACOC_0000489501-mRNA-1
Biological Process	GO:0043170	macromolecule metabolic process	MSTRG.5219.3
Biological Process	GO:0043170	macromolecule metabolic process	MSTRG.2239.1
Biological Process	GO:0043170	macromolecule metabolic process	MSTRG.5219.4
Biological Process	GO:0043170	macromolecule metabolic process	MSTRG.5219.1
Biological Process	GO:0043170	macromolecule metabolic process	transcript_ACOC_0000193701-mRNA-1
Biological Process	GO:0043170	macromolecule metabolic process	transcript_ACOC_0000126001-mRNA-1
Biological Process	GO:0043170	macromolecule metabolic process	MSTRG.1895.1
Biological Process	GO:0043170	macromolecule metabolic process	transcript_ACOC_0000334601-mRNA-1
Biological Process	GO:0043170	macromolecule metabolic process	MSTRG.6806.2
Biological Process	GO:0043170	macromolecule metabolic process	MSTRG.10194.1
Biological Process	GO:0043170	macromolecule metabolic process	MSTRG.5272.1
Biological Process	GO:0043170	macromolecule metabolic process	MSTRG.5829.1
Biological Process	GO:0043170	macromolecule metabolic process	transcript_ACOC_0001300201-mRNA-1
Biological Process	GO:0043170	macromolecule metabolic process	MSTRG.384.1
Biological Process	GO:0043170	macromolecule metabolic process	MSTRG.1164.1
Biological Process	GO:0043170	macromolecule metabolic process	MSTRG.384.2
Biological Process	GO:0043170	macromolecule metabolic process	transcript_ACOC_0000405501-mRNA-1
Biological Process	GO:0043170	macromolecule metabolic process	transcript_ACOC_0000864001-mRNA-1
Biological Process	GO:0043170	macromolecule metabolic process	MSTRG.11935.2
Biological Process	GO:0043170	macromolecule metabolic process	MSTRG.1164.3
Biological Process	GO:0043170	macromolecule metabolic process	transcript_ACOC_0000680601-mRNA-1
Biological Process	GO:0043170	macromolecule metabolic process	transcript_ACOC_0000471101-mRNA-1
Biological Process	GO:0043170	macromolecule metabolic process	MSTRG.11935.1
Biological Process	GO:0043170	macromolecule metabolic process	transcript_ACOC_0000822401-mRNA-1
Biological Process	GO:0043170	macromolecule metabolic process	transcript_ACOC_0000751501-mRNA-1
Biological Process	GO:0043170	macromolecule metabolic process	transcript_ACOC_0000544901-mRNA-1
Biological Process	GO:0043170	macromolecule metabolic process	transcript_ACOC_0001296401-mRNA-1
Biological Process	GO:0043170	macromolecule metabolic process	MSTRG.8373.2
Biological Process	GO:0043170	macromolecule metabolic process	transcript_ACOC_0001222301-mRNA-1
Biological Process	GO:0043170	macromolecule metabolic process	MSTRG.3694.1
Biological Process	GO:0043170	macromolecule metabolic process	MSTRG.5535.1
Biological Process	GO:0043170	macromolecule metabolic process	MSTRG.5339.2
Biological Process	GO:0043170	macromolecule metabolic process	MSTRG.8057.1
Biological Process	GO:0043170	macromolecule metabolic process	MSTRG.5339.1
Biological Process	GO:0043170	macromolecule metabolic process	transcript_ACOC_0000039901-mRNA-1
Biological Process	GO:0043170	macromolecule metabolic process	MSTRG.4996.1
Biological Process	GO:0043170	macromolecule metabolic process	transcript_ACOC_0000780501-mRNA-1
Biological Process	GO:0043170	macromolecule metabolic process	MSTRG.7131.1
Biological Process	GO:0043170	macromolecule metabolic process	transcript_ACOC_0000533001-mRNA-1
Biological Process	GO:0043170	macromolecule metabolic process	transcript_ACOC_0000876801-mRNA-1
Biological Process	GO:0043170	macromolecule metabolic process	MSTRG.11792.1
Biological Process	GO:0043170	macromolecule metabolic process	MSTRG.5668.2
Biological Process	GO:0043170	macromolecule metabolic process	MSTRG.188.1
Biological Process	GO:0043170	macromolecule metabolic process	MSTRG.5668.1
Biological Process	GO:0043170	macromolecule metabolic process	transcript_ACOC_0001169801-mRNA-1
Biological Process	GO:0043170	macromolecule metabolic process	MSTRG.5611.1
Biological Process	GO:0043170	macromolecule metabolic process	MSTRG.4876.2
Biological Process	GO:0043170	macromolecule metabolic process	transcript_ACOC_0000649401-mRNA-1
Biological Process	GO:0043170	macromolecule metabolic process	MSTRG.4876.3
Biological Process	GO:0043170	macromolecule metabolic process	MSTRG.4876.1
Biological Process	GO:0043170	macromolecule metabolic process	MSTRG.4667.1
Biological Process	GO:0043170	macromolecule metabolic process	transcript_ACOC_0000769901-mRNA-1
Biological Process	GO:0043170	macromolecule metabolic process	transcript_ACOC_0000130201-mRNA-1
Biological Process	GO:0043170	macromolecule metabolic process	MSTRG.4414.1
Biological Process	GO:0043170	macromolecule metabolic process	transcript_ACOC_0000310901-mRNA-1
Biological Process	GO:0043170	macromolecule metabolic process	transcript_ACOC_0000200201-mRNA-1
Biological Process	GO:0043170	macromolecule metabolic process	MSTRG.9840.1
Biological Process	GO:0043170	macromolecule metabolic process	transcript_ACOC_0001176801-mRNA-1
Biological Process	GO:0043170	macromolecule metabolic process	transcript_ACOC_0000659201-mRNA-1
Biological Process	GO:0043170	macromolecule metabolic process	MSTRG.6939.1
Biological Process	GO:0043170	macromolecule metabolic process	transcript_ACOC_0000741701-mRNA-1
Biological Process	GO:0043170	macromolecule metabolic process	transcript_ACOC_0001016601-mRNA-1
Biological Process	GO:0043170	macromolecule metabolic process	transcript_ACOC_0000327301-mRNA-1
Biological Process	GO:0043170	macromolecule metabolic process	transcript_ACOC_0001149801-mRNA-1
Biological Process	GO:0043170	macromolecule metabolic process	MSTRG.9292.1
Biological Process	GO:0043170	macromolecule metabolic process	MSTRG.5744.1
Biological Process	GO:0043170	macromolecule metabolic process	transcript_ACOC_0000920401-mRNA-1
Biological Process	GO:0043170	macromolecule metabolic process	MSTRG.12930.2
Biological Process	GO:0043170	macromolecule metabolic process	transcript_ACOC_0000148601-mRNA-1
Biological Process	GO:0043170	macromolecule metabolic process	MSTRG.7932.1
Biological Process	GO:0043170	macromolecule metabolic process	transcript_ACOC_0000532101-mRNA-1
Biological Process	GO:0043170	macromolecule metabolic process	transcript_ACOC_0000642801-mRNA-1
Biological Process	GO:0043170	macromolecule metabolic process	MSTRG.9106.1
Biological Process	GO:0043170	macromolecule metabolic process	MSTRG.4743.1
Biological Process	GO:0043170	macromolecule metabolic process	transcript_ACOC_0001277601-mRNA-1
Biological Process	GO:0043170	macromolecule metabolic process	MSTRG.4610.1
Biological Process	GO:0043170	macromolecule metabolic process	transcript_ACOC_0000236701-mRNA-1
Biological Process	GO:0043170	macromolecule metabolic process	MSTRG.7251.1
Biological Process	GO:0043170	macromolecule metabolic process	MSTRG.6587.1
Biological Process	GO:0043170	macromolecule metabolic process	MSTRG.4605.2
Biological Process	GO:0043170	macromolecule metabolic process	transcript_ACOC_0000564901-mRNA-1
Biological Process	GO:0043170	macromolecule metabolic process	transcript_ACOC_0000630001-mRNA-1
Biological Process	GO:0043170	macromolecule metabolic process	transcript_ACOC_0000635801-mRNA-1
Biological Process	GO:0043170	macromolecule metabolic process	MSTRG.10862.1
Biological Process	GO:0043170	macromolecule metabolic process	MSTRG.8529.4
Biological Process	GO:0043170	macromolecule metabolic process	MSTRG.8529.3
Biological Process	GO:0043170	macromolecule metabolic process	MSTRG.7371.1
Biological Process	GO:0043170	macromolecule metabolic process	MSTRG.8529.5
Biological Process	GO:0043170	macromolecule metabolic process	MSTRG.950.1
Biological Process	GO:0043170	macromolecule metabolic process	transcript_ACOC_0000179301-mRNA-1
Biological Process	GO:0043170	macromolecule metabolic process	transcript_ACOC_0000167701-mRNA-1
Biological Process	GO:0043170	macromolecule metabolic process	MSTRG.175.1
Biological Process	GO:0043170	macromolecule metabolic process	MSTRG.4921.5
Biological Process	GO:0043170	macromolecule metabolic process	transcript_ACOC_0000697101-mRNA-1
Biological Process	GO:0043170	macromolecule metabolic process	transcript_ACOC_0000577501-mRNA-1
Biological Process	GO:0043170	macromolecule metabolic process	MSTRG.9198.1
Biological Process	GO:0043170	macromolecule metabolic process	MSTRG.3018.1
Biological Process	GO:0043170	macromolecule metabolic process	MSTRG.3018.2
Biological Process	GO:0043170	macromolecule metabolic process	transcript_ACOC_0000090001-mRNA-1
Biological Process	GO:0043170	macromolecule metabolic process	MSTRG.8895.1
Biological Process	GO:0043170	macromolecule metabolic process	MSTRG.10146.1
Biological Process	GO:0043170	macromolecule metabolic process	transcript_ACOC_0001062401-mRNA-1
Biological Process	GO:0043170	macromolecule metabolic process	transcript_ACOC_0000065901-mRNA-1
Biological Process	GO:0043170	macromolecule metabolic process	transcript_ACOC_0000648401-mRNA-1
Biological Process	GO:0043170	macromolecule metabolic process	MSTRG.7767.1
Biological Process	GO:0043170	macromolecule metabolic process	MSTRG.5104.2
Biological Process	GO:0043170	macromolecule metabolic process	MSTRG.5104.1
Biological Process	GO:0043170	macromolecule metabolic process	transcript_ACOC_0001273701-mRNA-1
Biological Process	GO:0043170	macromolecule metabolic process	transcript_ACOC_0000288101-mRNA-1
Biological Process	GO:0043170	macromolecule metabolic process	MSTRG.2568.1
Biological Process	GO:0043170	macromolecule metabolic process	MSTRG.8762.2
Biological Process	GO:0043170	macromolecule metabolic process	transcript_ACOC_0000693501-mRNA-1
Biological Process	GO:0043170	macromolecule metabolic process	transcript_ACOC_0001139901-mRNA-1
Biological Process	GO:0043170	macromolecule metabolic process	MSTRG.4725.2
Biological Process	GO:0043170	macromolecule metabolic process	transcript_ACOC_0000764401-mRNA-1
Biological Process	GO:0043170	macromolecule metabolic process	transcript_ACOC_0000519801-mRNA-1
Biological Process	GO:0043170	macromolecule metabolic process	MSTRG.10995.2
Biological Process	GO:0043170	macromolecule metabolic process	MSTRG.7767.5
Biological Process	GO:0043170	macromolecule metabolic process	MSTRG.5104.3
Biological Process	GO:0043170	macromolecule metabolic process	MSTRG.7767.2
Biological Process	GO:0043170	macromolecule metabolic process	MSTRG.12173.1
Biological Process	GO:0043170	macromolecule metabolic process	MSTRG.7767.3
Biological Process	GO:0043170	macromolecule metabolic process	MSTRG.5104.5
Biological Process	GO:0043170	macromolecule metabolic process	transcript_ACOC_0000448901-mRNA-1
Biological Process	GO:0043170	macromolecule metabolic process	MSTRG.10475.1
Biological Process	GO:0043170	macromolecule metabolic process	MSTRG.1177.1
Biological Process	GO:0043170	macromolecule metabolic process	MSTRG.318.2
Biological Process	GO:0043170	macromolecule metabolic process	transcript_ACOC_0000890001-mRNA-1
Biological Process	GO:0043170	macromolecule metabolic process	MSTRG.318.1
Biological Process	GO:0043170	macromolecule metabolic process	MSTRG.4582.1
Biological Process	GO:0043170	macromolecule metabolic process	MSTRG.4582.2
Biological Process	GO:0043170	macromolecule metabolic process	transcript_ACOC_0000468701-mRNA-1
Biological Process	GO:0043170	macromolecule metabolic process	MSTRG.7438.1
Biological Process	GO:0043170	macromolecule metabolic process	MSTRG.11285.1
Biological Process	GO:0043170	macromolecule metabolic process	MSTRG.7438.2
Biological Process	GO:0043170	macromolecule metabolic process	transcript_ACOC_0000451301-mRNA-1
Biological Process	GO:0043170	macromolecule metabolic process	MSTRG.1816.2
Biological Process	GO:0043170	macromolecule metabolic process	transcript_ACOC_0000698101-mRNA-1
Biological Process	GO:0043170	macromolecule metabolic process	transcript_ACOC_0000257401-mRNA-1
Biological Process	GO:0043170	macromolecule metabolic process	MSTRG.12160.2
Biological Process	GO:0043170	macromolecule metabolic process	transcript_ACOC_0000054101-mRNA-1
Biological Process	GO:0043170	macromolecule metabolic process	MSTRG.11178.3
Biological Process	GO:0043170	macromolecule metabolic process	transcript_ACOC_0001019301-mRNA-1
Biological Process	GO:0043170	macromolecule metabolic process	MSTRG.11178.2
Biological Process	GO:0043170	macromolecule metabolic process	MSTRG.10982.1
Biological Process	GO:0043170	macromolecule metabolic process	MSTRG.2065.2
Biological Process	GO:0043170	macromolecule metabolic process	transcript_ACOC_0000430501-mRNA-1
Biological Process	GO:0043170	macromolecule metabolic process	transcript_ACOC_0000154901-mRNA-1
Biological Process	GO:0043170	macromolecule metabolic process	MSTRG.7491.1
Biological Process	GO:0043170	macromolecule metabolic process	MSTRG.11953.3
Biological Process	GO:0043170	macromolecule metabolic process	transcript_ACOC_0000959501-mRNA-1
Biological Process	GO:0043170	macromolecule metabolic process	MSTRG.11757.2
Biological Process	GO:0043170	macromolecule metabolic process	transcript_ACOC_0000207701-mRNA-1
Biological Process	GO:0043170	macromolecule metabolic process	transcript_ACOC_0000666501-mRNA-1
Biological Process	GO:0043170	macromolecule metabolic process	MSTRG.7514.1
Biological Process	GO:0043170	macromolecule metabolic process	transcript_ACOC_0001192001-mRNA-1
Biological Process	GO:0043170	macromolecule metabolic process	transcript_ACOC_0000955901-mRNA-1
Biological Process	GO:0043170	macromolecule metabolic process	transcript_ACOC_0000583701-mRNA-1
Biological Process	GO:0043170	macromolecule metabolic process	transcript_ACOC_0000473001-mRNA-1
Biological Process	GO:0043170	macromolecule metabolic process	MSTRG.10786.1
Biological Process	GO:0043170	macromolecule metabolic process	transcript_ACOC_0000294301-mRNA-1
Biological Process	GO:0043170	macromolecule metabolic process	transcript_ACOC_0000936801-mRNA-1
Biological Process	GO:0043170	macromolecule metabolic process	transcript_ACOC_0001171201-mRNA-1
Biological Process	GO:0043170	macromolecule metabolic process	transcript_ACOC_0000397801-mRNA-1
Biological Process	GO:0043170	macromolecule metabolic process	transcript_ACOC_0000865901-mRNA-1
Biological Process	GO:0043170	macromolecule metabolic process	transcript_ACOC_0000558701-mRNA-1
Biological Process	GO:0043170	macromolecule metabolic process	MSTRG.5224.2
Biological Process	GO:0043170	macromolecule metabolic process	transcript_ACOC_0000186501-mRNA-1
Biological Process	GO:0043170	macromolecule metabolic process	MSTRG.9524.3
Biological Process	GO:0043170	macromolecule metabolic process	transcript_ACOC_0000100601-mRNA-1
Biological Process	GO:0043170	macromolecule metabolic process	MSTRG.7843.1
Biological Process	GO:0043170	macromolecule metabolic process	transcript_ACOC_0000941101-mRNA-1
Biological Process	GO:0043170	macromolecule metabolic process	MSTRG.9524.2
Biological Process	GO:0043170	macromolecule metabolic process	MSTRG.10653.1
Biological Process	GO:0043170	macromolecule metabolic process	MSTRG.6498.1
Biological Process	GO:0043170	macromolecule metabolic process	MSTRG.2404.1
Biological Process	GO:0043170	macromolecule metabolic process	MSTRG.8342.1
Biological Process	GO:0043170	macromolecule metabolic process	MSTRG.8342.3
Biological Process	GO:0043170	macromolecule metabolic process	transcript_ACOC_0000970101-mRNA-1
Biological Process	GO:0043170	macromolecule metabolic process	MSTRG.8342.4
Biological Process	GO:0043170	macromolecule metabolic process	MSTRG.9417.1
Biological Process	GO:0043170	macromolecule metabolic process	transcript_ACOC_0001246701-mRNA-1
Biological Process	GO:0043170	macromolecule metabolic process	MSTRG.9613.1
Biological Process	GO:0043170	macromolecule metabolic process	transcript_ACOC_0001082201-mRNA-1
Biological Process	GO:0043170	macromolecule metabolic process	MSTRG.3321.1
Biological Process	GO:0043170	macromolecule metabolic process	MSTRG.4712.2
Biological Process	GO:0043170	macromolecule metabolic process	MSTRG.10235.1
Biological Process	GO:0043170	macromolecule metabolic process	transcript_ACOC_0000600301-mRNA-1
Biological Process	GO:0043170	macromolecule metabolic process	MSTRG.6957.1
Biological Process	GO:0043170	macromolecule metabolic process	transcript_ACOC_0000485801-mRNA-1
Biological Process	GO:0043170	macromolecule metabolic process	MSTRG.7109.1
Biological Process	GO:0043170	macromolecule metabolic process	transcript_ACOC_0001317601-mRNA-1
Biological Process	GO:0043170	macromolecule metabolic process	transcript_ACOC_0000141101-mRNA-1
Biological Process	GO:0043170	macromolecule metabolic process	transcript_ACOC_0000618701-mRNA-1
Biological Process	GO:0043170	macromolecule metabolic process	transcript_ACOC_0000806301-mRNA-1
Biological Process	GO:0043170	macromolecule metabolic process	MSTRG.6276.1
Biological Process	GO:0043170	macromolecule metabolic process	transcript_ACOC_0000196401-mRNA-1
Biological Process	GO:0043170	macromolecule metabolic process	transcript_ACOC_0000702801-mRNA-1
Biological Process	GO:0043170	macromolecule metabolic process	transcript_ACOC_0000664501-mRNA-1
Biological Process	GO:0043170	macromolecule metabolic process	transcript_ACOC_0000735401-mRNA-1
Biological Process	GO:0043170	macromolecule metabolic process	transcript_ACOC_0000225801-mRNA-1
Biological Process	GO:0043170	macromolecule metabolic process	MSTRG.6837.2
Biological Process	GO:0043170	macromolecule metabolic process	MSTRG.229.3
Biological Process	GO:0043170	macromolecule metabolic process	transcript_ACOC_0000547801-mRNA-1
Biological Process	GO:0043170	macromolecule metabolic process	transcript_ACOC_0000810601-mRNA-1
Biological Process	GO:0043170	macromolecule metabolic process	MSTRG.2394.1
Biological Process	GO:0043170	macromolecule metabolic process	transcript_ACOC_0000216901-mRNA-1
Biological Process	GO:0043170	macromolecule metabolic process	MSTRG.1266.1
Biological Process	GO:0043170	macromolecule metabolic process	MSTRG.229.1
Biological Process	GO:0043170	macromolecule metabolic process	MSTRG.5566.1
Biological Process	GO:0043170	macromolecule metabolic process	MSTRG.5762.1
Biological Process	GO:0043170	macromolecule metabolic process	MSTRG.1266.4
Biological Process	GO:0043170	macromolecule metabolic process	MSTRG.5762.2
Biological Process	GO:0043170	macromolecule metabolic process	MSTRG.1266.2
Biological Process	GO:0043170	macromolecule metabolic process	MSTRG.1266.3
Biological Process	GO:0043170	macromolecule metabolic process	MSTRG.7678.1
Biological Process	GO:0043170	macromolecule metabolic process	MSTRG.8475.2
Biological Process	GO:0043170	macromolecule metabolic process	MSTRG.10431.1
Biological Process	GO:0043170	macromolecule metabolic process	MSTRG.5433.1
Biological Process	GO:0043170	macromolecule metabolic process	MSTRG.6561.1
Biological Process	GO:0043170	macromolecule metabolic process	MSTRG.9185.1
Biological Process	GO:0043170	macromolecule metabolic process	MSTRG.1146.1
Biological Process	GO:0043170	macromolecule metabolic process	MSTRG.6681.1
Biological Process	GO:0043170	macromolecule metabolic process	transcript_ACOC_0000296301-mRNA-1
Biological Process	GO:0043170	macromolecule metabolic process	transcript_ACOC_0000213001-mRNA-1
Biological Process	GO:0043170	macromolecule metabolic process	transcript_ACOC_0000557701-mRNA-1
Biological Process	GO:0043170	macromolecule metabolic process	transcript_ACOC_0000495701-mRNA-1
Biological Process	GO:0043170	macromolecule metabolic process	transcript_ACOC_0000924001-mRNA-1
Biological Process	GO:0043170	macromolecule metabolic process	transcript_ACOC_0001191001-mRNA-1
Biological Process	GO:0043170	macromolecule metabolic process	transcript_ACOC_0000990801-mRNA-1
Biological Process	GO:0043170	macromolecule metabolic process	transcript_ACOC_0000190801-mRNA-1
Biological Process	GO:0043170	macromolecule metabolic process	transcript_ACOC_0000844201-mRNA-1
Biological Process	GO:0043170	macromolecule metabolic process	transcript_ACOC_0000252801-mRNA-1
Biological Process	GO:0043170	macromolecule metabolic process	MSTRG.2590.1
Biological Process	GO:0043170	macromolecule metabolic process	transcript_ACOC_0001253001-mRNA-1
Biological Process	GO:0043170	macromolecule metabolic process	MSTRG.6681.2
Biological Process	GO:0043170	macromolecule metabolic process	MSTRG.7229.1
Biological Process	GO:0043170	macromolecule metabolic process	MSTRG.10577.2
Biological Process	GO:0043170	macromolecule metabolic process	MSTRG.10577.1
Biological Process	GO:0043170	macromolecule metabolic process	transcript_ACOC_0000584701-mRNA-1
Biological Process	GO:0043170	macromolecule metabolic process	transcript_ACOC_0000474001-mRNA-1
Biological Process	GO:0043170	macromolecule metabolic process	transcript_ACOC_0000181901-mRNA-1
Biological Process	GO:0043170	macromolecule metabolic process	transcript_ACOC_0000593601-mRNA-1
Biological Process	GO:0043170	macromolecule metabolic process	MSTRG.6156.1
Biological Process	GO:0043170	macromolecule metabolic process	transcript_ACOC_0000906201-mRNA-1
Biological Process	GO:0043170	macromolecule metabolic process	transcript_ACOC_0000447001-mRNA-1
Biological Process	GO:0043170	macromolecule metabolic process	transcript_ACOC_0001227901-mRNA-1
Biological Process	GO:0043170	macromolecule metabolic process	MSTRG.5237.1
Biological Process	GO:0043170	macromolecule metabolic process	transcript_ACOC_0001190001-mRNA-1
Biological Process	GO:0043170	macromolecule metabolic process	MSTRG.7282.1
Biological Process	GO:0043170	macromolecule metabolic process	MSTRG.6023.1
Biological Process	GO:0043170	macromolecule metabolic process	MSTRG.10640.1
Biological Process	GO:0043170	macromolecule metabolic process	MSTRG.6023.3
Biological Process	GO:0043170	macromolecule metabolic process	MSTRG.6023.2
Biological Process	GO:0043170	macromolecule metabolic process	transcript_ACOC_0001236801-mRNA-1
Biological Process	GO:0043170	macromolecule metabolic process	transcript_ACOC_0000351701-mRNA-1
Biological Process	GO:0043170	macromolecule metabolic process	MSTRG.710.1
Biological Process	GO:0043170	macromolecule metabolic process	transcript_ACOC_0001225001-mRNA-1
Biological Process	GO:0043170	macromolecule metabolic process	MSTRG.10311.1
Biological Process	GO:0043170	macromolecule metabolic process	transcript_ACOC_0000348101-mRNA-1
Biological Process	GO:0043170	macromolecule metabolic process	transcript_ACOC_0000431501-mRNA-1
Biological Process	GO:0043170	macromolecule metabolic process	transcript_ACOC_0000422601-mRNA-1
Biological Process	GO:0043170	macromolecule metabolic process	MSTRG.11165.2
Biological Process	GO:0043170	macromolecule metabolic process	MSTRG.11165.1
Biological Process	GO:0043170	macromolecule metabolic process	MSTRG.5971.1
Biological Process	GO:0043170	macromolecule metabolic process	MSTRG.12423.1
Biological Process	GO:0043170	macromolecule metabolic process	transcript_ACOC_0001200601-mRNA-1
Biological Process	GO:0043170	macromolecule metabolic process	MSTRG.9394.2
Biological Process	GO:0043170	macromolecule metabolic process	MSTRG.1936.1
Biological Process	GO:0043170	macromolecule metabolic process	MSTRG.1342.1
Biological Process	GO:0043170	macromolecule metabolic process	transcript_ACOC_0000419001-mRNA-1
Biological Process	GO:0043170	macromolecule metabolic process	MSTRG.1342.2
Biological Process	GO:0043170	macromolecule metabolic process	MSTRG.5094.1
Biological Process	GO:0043170	macromolecule metabolic process	MSTRG.1331.2
Biological Process	GO:0043170	macromolecule metabolic process	transcript_ACOC_0000374101-mRNA-1
Biological Process	GO:0043170	macromolecule metabolic process	MSTRG.7544.1
Biological Process	GO:0043170	macromolecule metabolic process	transcript_ACOC_0000234901-mRNA-1
Biological Process	GO:0043170	macromolecule metabolic process	MSTRG.5692.1
Biological Process	GO:0043170	macromolecule metabolic process	transcript_ACOC_0000183601-mRNA-1
Biological Process	GO:0043170	macromolecule metabolic process	transcript_ACOC_0000957801-mRNA-1
Biological Process	GO:0043170	macromolecule metabolic process	transcript_ACOC_0001319701-mRNA-1
Biological Process	GO:0043170	macromolecule metabolic process	MSTRG.10527.1
Biological Process	GO:0043170	macromolecule metabolic process	MSTRG.6600.1
Biological Process	GO:0043170	macromolecule metabolic process	MSTRG.6590.3
Biological Process	GO:0043170	macromolecule metabolic process	transcript_ACOC_0000051201-mRNA-1
Biological Process	GO:0043170	macromolecule metabolic process	MSTRG.1738.1
Biological Process	GO:0043170	macromolecule metabolic process	MSTRG.4432.1
Biological Process	GO:0043170	macromolecule metabolic process	MSTRG.6590.1
Biological Process	GO:0043170	macromolecule metabolic process	MSTRG.11075.1
Biological Process	GO:0043170	macromolecule metabolic process	MSTRG.11787.1
Biological Process	GO:0043170	macromolecule metabolic process	MSTRG.2482.1
Biological Process	GO:0043170	macromolecule metabolic process	transcript_ACOC_0000795901-mRNA-1
Biological Process	GO:0043170	macromolecule metabolic process	MSTRG.1595.2
Biological Process	GO:0043170	macromolecule metabolic process	transcript_ACOC_0001010801-mRNA-1
Biological Process	GO:0043170	macromolecule metabolic process	MSTRG.8936.1
Biological Process	GO:0043170	macromolecule metabolic process	MSTRG.8936.2
Biological Process	GO:0043170	macromolecule metabolic process	MSTRG.11338.1
Biological Process	GO:0043170	macromolecule metabolic process	MSTRG.11338.2
Biological Process	GO:0043170	macromolecule metabolic process	MSTRG.11338.3
Biological Process	GO:0043170	macromolecule metabolic process	MSTRG.5955.1
Biological Process	GO:0043170	macromolecule metabolic process	transcript_ACOC_0000865101-mRNA-1
Biological Process	GO:0043170	macromolecule metabolic process	MSTRG.1464.1
Biological Process	GO:0043170	macromolecule metabolic process	MSTRG.10011.1
Biological Process	GO:0043170	macromolecule metabolic process	MSTRG.9351.1
Biological Process	GO:0043170	macromolecule metabolic process	MSTRG.9168.1
Biological Process	GO:0043170	macromolecule metabolic process	MSTRG.664.1
Biological Process	GO:0043170	macromolecule metabolic process	MSTRG.9680.1
Biological Process	GO:0043170	macromolecule metabolic process	MSTRG.1148.1
Biological Process	GO:0043170	macromolecule metabolic process	transcript_ACOC_0000905301-mRNA-1
Biological Process	GO:0043170	macromolecule metabolic process	transcript_ACOC_0000160201-mRNA-1
Biological Process	GO:0043170	macromolecule metabolic process	MSTRG.8923.1
Biological Process	GO:0043170	macromolecule metabolic process	transcript_ACOC_0001025401-mRNA-1
Biological Process	GO:0043170	macromolecule metabolic process	MSTRG.2758.2
Biological Process	GO:0043170	macromolecule metabolic process	transcript_ACOC_0001191901-mRNA-1
Biological Process	GO:0043170	macromolecule metabolic process	MSTRG.2758.1
Biological Process	GO:0043170	macromolecule metabolic process	MSTRG.5110.1
Biological Process	GO:0043170	macromolecule metabolic process	transcript_ACOC_0000174601-mRNA-1
Biological Process	GO:0043170	macromolecule metabolic process	MSTRG.993.1
Biological Process	GO:0043170	macromolecule metabolic process	MSTRG.8115.1
Biological Process	GO:0043170	macromolecule metabolic process	transcript_ACOC_0001057301-mRNA-1
Biological Process	GO:0043170	macromolecule metabolic process	MSTRG.7411.1
Biological Process	GO:0043170	macromolecule metabolic process	transcript_ACOC_0000807401-mRNA-1
Biological Process	GO:0043170	macromolecule metabolic process	MSTRG.7411.2
Biological Process	GO:0043170	macromolecule metabolic process	MSTRG.8564.1
Biological Process	GO:0043170	macromolecule metabolic process	MSTRG.38.1
Biological Process	GO:0043170	macromolecule metabolic process	transcript_ACOC_0001022601-mRNA-1
Biological Process	GO:0043170	macromolecule metabolic process	MSTRG.6021.2
Biological Process	GO:0043170	macromolecule metabolic process	transcript_ACOC_0000495901-mRNA-1
Biological Process	GO:0043170	macromolecule metabolic process	transcript_ACOC_0000113101-mRNA-1
Biological Process	GO:0043170	macromolecule metabolic process	MSTRG.5519.1
Biological Process	GO:0043170	macromolecule metabolic process	MSTRG.8311.1
Biological Process	GO:0043170	macromolecule metabolic process	MSTRG.3316.1
Biological Process	GO:0043170	macromolecule metabolic process	MSTRG.10767.1
Biological Process	GO:0043170	macromolecule metabolic process	MSTRG.10397.1
Biological Process	GO:0043170	macromolecule metabolic process	transcript_ACOC_0000731601-mRNA-1
Biological Process	GO:0043170	macromolecule metabolic process	MSTRG.4828.2
Biological Process	GO:0043170	macromolecule metabolic process	MSTRG.5376.1
Biological Process	GO:0043170	macromolecule metabolic process	transcript_ACOC_0000931101-mRNA-1
Biological Process	GO:0043170	macromolecule metabolic process	MSTRG.12467.1
Biological Process	GO:0043170	macromolecule metabolic process	transcript_ACOC_0001014801-mRNA-1
Biological Process	GO:0043170	macromolecule metabolic process	MSTRG.12913.2
Biological Process	GO:0043170	macromolecule metabolic process	MSTRG.12913.1
Biological Process	GO:0043170	macromolecule metabolic process	transcript_ACOC_0000692601-mRNA-1
Biological Process	GO:0043170	macromolecule metabolic process	transcript_ACOC_0001262801-mRNA-1
Biological Process	GO:0043170	macromolecule metabolic process	transcript_ACOC_0000950001-mRNA-1
Biological Process	GO:0043170	macromolecule metabolic process	transcript_ACOC_0001314801-mRNA-1
Biological Process	GO:0043170	macromolecule metabolic process	transcript_ACOC_0000723801-mRNA-1
Biological Process	GO:0043170	macromolecule metabolic process	MSTRG.4881.1
Biological Process	GO:0043170	macromolecule metabolic process	MSTRG.5243.1
Biological Process	GO:0043170	macromolecule metabolic process	MSTRG.9497.1
Biological Process	GO:0043170	macromolecule metabolic process	transcript_ACOC_0001276701-mRNA-1
Biological Process	GO:0043170	macromolecule metabolic process	MSTRG.1081.1
Biological Process	GO:0043170	macromolecule metabolic process	MSTRG.12378.1
Biological Process	GO:0043170	macromolecule metabolic process	MSTRG.9956.1
Biological Process	GO:0043170	macromolecule metabolic process	MSTRG.2179.1
Biological Process	GO:0043170	macromolecule metabolic process	MSTRG.6328.1
Biological Process	GO:0043170	macromolecule metabolic process	transcript_ACOC_0000000901-mRNA-1
Biological Process	GO:0043170	macromolecule metabolic process	MSTRG.11284.1
Biological Process	GO:0043170	macromolecule metabolic process	transcript_ACOC_0000775301-mRNA-1
Biological Process	GO:0043170	macromolecule metabolic process	MSTRG.9244.1
Biological Process	GO:0043170	macromolecule metabolic process	MSTRG.1529.1
Biological Process	GO:0043170	macromolecule metabolic process	transcript_ACOC_0000333701-mRNA-1
Biological Process	GO:0043170	macromolecule metabolic process	transcript_ACOC_0000853301-mRNA-1
Biological Process	GO:0043170	macromolecule metabolic process	transcript_ACOC_0000403701-mRNA-1
Biological Process	GO:0043170	macromolecule metabolic process	transcript_ACOC_0000559401-mRNA-1
Biological Process	GO:0043170	macromolecule metabolic process	MSTRG.1028.1
Biological Process	GO:0043170	macromolecule metabolic process	MSTRG.8444.1
Biological Process	GO:0043170	macromolecule metabolic process	transcript_ACOC_0001298201-mRNA-1
Biological Process	GO:0043170	macromolecule metabolic process	MSTRG.9956.2
Biological Process	GO:0043170	macromolecule metabolic process	MSTRG.10144.1
Biological Process	GO:0043170	macromolecule metabolic process	MSTRG.4343.1
Biological Process	GO:0043170	macromolecule metabolic process	MSTRG.2518.2
Biological Process	GO:0043170	macromolecule metabolic process	MSTRG.2242.6
Biological Process	GO:0043170	macromolecule metabolic process	MSTRG.2518.1
Biological Process	GO:0043170	macromolecule metabolic process	transcript_ACOC_0001072501-mRNA-1
Biological Process	GO:0043170	macromolecule metabolic process	MSTRG.11062.1
Biological Process	GO:0043170	macromolecule metabolic process	transcript_ACOC_0000118001-mRNA-1
Biological Process	GO:0043170	macromolecule metabolic process	MSTRG.7784.1
Biological Process	GO:0043170	macromolecule metabolic process	MSTRG.4619.1
Biological Process	GO:0043170	macromolecule metabolic process	MSTRG.11610.1
Biological Process	GO:0043170	macromolecule metabolic process	transcript_ACOC_0000140101-mRNA-1
Biological Process	GO:0043170	macromolecule metabolic process	transcript_ACOC_0001240101-mRNA-1
Biological Process	GO:0043170	macromolecule metabolic process	MSTRG.7468.2
Biological Process	GO:0043170	macromolecule metabolic process	MSTRG.7468.3
Biological Process	GO:0043170	macromolecule metabolic process	MSTRG.6185.4
Biological Process	GO:0043170	macromolecule metabolic process	transcript_ACOC_0000211001-mRNA-1
Biological Process	GO:0043170	macromolecule metabolic process	MSTRG.3423.1
Biological Process	GO:0043170	macromolecule metabolic process	MSTRG.4935.1
Biological Process	GO:0043170	macromolecule metabolic process	MSTRG.6185.2
Biological Process	GO:0043170	macromolecule metabolic process	transcript_ACOC_0000516901-mRNA-1
Biological Process	GO:0043170	macromolecule metabolic process	transcript_ACOC_0000878601-mRNA-1
Biological Process	GO:0043170	macromolecule metabolic process	MSTRG.1725.2
Biological Process	GO:0043170	macromolecule metabolic process	MSTRG.8967.2
Biological Process	GO:0043170	macromolecule metabolic process	MSTRG.8967.1
Biological Process	GO:0043170	macromolecule metabolic process	transcript_ACOC_0000761401-mRNA-1
Biological Process	GO:0043170	macromolecule metabolic process	MSTRG.740.1
Biological Process	GO:0043170	macromolecule metabolic process	transcript_ACOC_0000903201-mRNA-1
Biological Process	GO:0043170	macromolecule metabolic process	MSTRG.11623.1
Biological Process	GO:0043170	macromolecule metabolic process	transcript_ACOC_0000777901-mRNA-1
Biological Process	GO:0043170	macromolecule metabolic process	MSTRG.7455.1
Biological Process	GO:0043170	macromolecule metabolic process	transcript_ACOC_0000912401-mRNA-1
Biological Process	GO:0043170	macromolecule metabolic process	MSTRG.7202.2
Biological Process	GO:0043170	macromolecule metabolic process	MSTRG.9364.1
Biological Process	GO:0043170	macromolecule metabolic process	MSTRG.6879.1
Biological Process	GO:0043170	macromolecule metabolic process	MSTRG.11623.2
Biological Process	GO:0043170	macromolecule metabolic process	MSTRG.7664.1
Biological Process	GO:0043170	macromolecule metabolic process	MSTRG.8520.1
Biological Process	GO:0043170	macromolecule metabolic process	MSTRG.7202.1
Biological Process	GO:0043170	macromolecule metabolic process	MSTRG.5256.1
Biological Process	GO:0043170	macromolecule metabolic process	transcript_ACOC_0000833201-mRNA-1
Biological Process	GO:0043170	macromolecule metabolic process	transcript_ACOC_0000806201-mRNA-1
Biological Process	GO:0043170	macromolecule metabolic process	MSTRG.5465.1
Biological Process	GO:0043170	macromolecule metabolic process	transcript_ACOC_0000043401-mRNA-1
Biological Process	GO:0043170	macromolecule metabolic process	MSTRG.9507.1
Biological Process	GO:0043170	macromolecule metabolic process	MSTRG.4596.1
Biological Process	GO:0043170	macromolecule metabolic process	transcript_ACOC_0000709501-mRNA-1
Biological Process	GO:0043170	macromolecule metabolic process	transcript_ACOC_0001226101-mRNA-1
Biological Process	GO:0043170	macromolecule metabolic process	transcript_ACOC_0000194701-mRNA-1
Biological Process	GO:0043170	macromolecule metabolic process	MSTRG.5661.1
Biological Process	GO:0043170	macromolecule metabolic process	transcript_ACOC_0000083101-mRNA-1
Biological Process	GO:0043170	macromolecule metabolic process	MSTRG.6065.2
Biological Process	GO:0043170	macromolecule metabolic process	transcript_ACOC_0000803701-mRNA-1
Biological Process	GO:0043170	macromolecule metabolic process	MSTRG.11271.1
Biological Process	GO:0043170	macromolecule metabolic process	MSTRG.6065.1
Biological Process	GO:0043170	macromolecule metabolic process	MSTRG.8128.1
Biological Process	GO:0043170	macromolecule metabolic process	MSTRG.8128.2
Biological Process	GO:0043170	macromolecule metabolic process	transcript_ACOC_0001000101-mRNA-1
Biological Process	GO:0043170	macromolecule metabolic process	MSTRG.9231.1
Biological Process	GO:0043170	macromolecule metabolic process	transcript_ACOC_0000114301-mRNA-1
Biological Process	GO:0043170	macromolecule metabolic process	MSTRG.10353.2
Biological Process	GO:0043170	macromolecule metabolic process	transcript_ACOC_0000499601-mRNA-1
Biological Process	GO:0043170	macromolecule metabolic process	transcript_ACOC_0000470101-mRNA-1
Biological Process	GO:0043170	macromolecule metabolic process	transcript_ACOC_0000543901-mRNA-1
Biological Process	GO:0043170	macromolecule metabolic process	MSTRG.2495.2
Biological Process	GO:0043170	macromolecule metabolic process	MSTRG.2495.1
Biological Process	GO:0043170	macromolecule metabolic process	MSTRG.5608.1
Biological Process	GO:0043170	macromolecule metabolic process	transcript_ACOC_0001087101-mRNA-1
Biological Process	GO:0043170	macromolecule metabolic process	MSTRG.10425.1
Biological Process	GO:0043170	macromolecule metabolic process	transcript_ACOC_0000684501-mRNA-1
Biological Process	GO:0043170	macromolecule metabolic process	transcript_ACOC_0001267501-mRNA-1
Biological Process	GO:0043170	macromolecule metabolic process	transcript_ACOC_0000984501-mRNA-1
Biological Process	GO:0043170	macromolecule metabolic process	MSTRG.5590.3
Biological Process	GO:0043170	macromolecule metabolic process	MSTRG.2135.1
Biological Process	GO:0043170	macromolecule metabolic process	MSTRG.7838.1
Biological Process	GO:0043170	macromolecule metabolic process	MSTRG.6688.1
Biological Process	GO:0043170	macromolecule metabolic process	transcript_ACOC_0001009301-mRNA-1
Biological Process	GO:0043170	macromolecule metabolic process	MSTRG.8194.1
Biological Process	GO:0043170	macromolecule metabolic process	MSTRG.6119.1
Biological Process	GO:0043170	macromolecule metabolic process	transcript_ACOC_0000527801-mRNA-1
Biological Process	GO:0043170	macromolecule metabolic process	MSTRG.8194.2
Biological Process	GO:0043170	macromolecule metabolic process	transcript_ACOC_0001046401-mRNA-1
Biological Process	GO:0043170	macromolecule metabolic process	transcript_ACOC_0001305001-mRNA-1
Biological Process	GO:0043170	macromolecule metabolic process	MSTRG.705.2
Biological Process	GO:0043170	macromolecule metabolic process	MSTRG.3601.1
Biological Process	GO:0043170	macromolecule metabolic process	MSTRG.705.1
Biological Process	GO:0043170	macromolecule metabolic process	MSTRG.695.1
Biological Process	GO:0043170	macromolecule metabolic process	transcript_ACOC_0000552101-mRNA-1
Biological Process	GO:0043170	macromolecule metabolic process	transcript_ACOC_0000459701-mRNA-1
Biological Process	GO:0043170	macromolecule metabolic process	MSTRG.8638.1
Biological Process	GO:0043170	macromolecule metabolic process	MSTRG.7126.1
Biological Process	GO:0043170	macromolecule metabolic process	MSTRG.2847.1
Biological Process	GO:0043170	macromolecule metabolic process	transcript_ACOC_0000285501-mRNA-1
Biological Process	GO:0043170	macromolecule metabolic process	MSTRG.9190.1
Biological Process	GO:0043170	macromolecule metabolic process	transcript_ACOC_0000803401-mRNA-1
Biological Process	GO:0043170	macromolecule metabolic process	transcript_ACOC_0000352601-mRNA-1
Biological Process	GO:0043170	macromolecule metabolic process	transcript_ACOC_0000514001-mRNA-1
Biological Process	GO:0043170	macromolecule metabolic process	MSTRG.7322.1
Biological Process	GO:0043170	macromolecule metabolic process	transcript_ACOC_0000043101-mRNA-1
Biological Process	GO:0043170	macromolecule metabolic process	transcript_ACOC_0000423501-mRNA-1
Biological Process	GO:0043170	macromolecule metabolic process	transcript_ACOC_0000681701-mRNA-1
Biological Process	GO:0043170	macromolecule metabolic process	MSTRG.8701.3
Biological Process	GO:0043170	macromolecule metabolic process	MSTRG.2015.1
Biological Process	GO:0043170	macromolecule metabolic process	transcript_ACOC_0001202201-mRNA-1
Biological Process	GO:0043170	macromolecule metabolic process	transcript_ACOC_0000593501-mRNA-1
Biological Process	GO:0043170	macromolecule metabolic process	transcript_ACOC_0001163201-mRNA-1
Biological Process	GO:0043170	macromolecule metabolic process	MSTRG.5078.1
Biological Process	GO:0043170	macromolecule metabolic process	transcript_ACOC_0001181001-mRNA-1
Biological Process	GO:0043170	macromolecule metabolic process	transcript_ACOC_0000176701-mRNA-1
Biological Process	GO:0043170	macromolecule metabolic process	MSTRG.5198.1
Biological Process	GO:0043170	macromolecule metabolic process	MSTRG.3471.1
Biological Process	GO:0043170	macromolecule metabolic process	transcript_ACOC_0001024501-mRNA-1
Biological Process	GO:0043170	macromolecule metabolic process	MSTRG.5198.2
Biological Process	GO:0043170	macromolecule metabolic process	transcript_ACOC_0000905001-mRNA-1
Biological Process	GO:0043170	macromolecule metabolic process	transcript_ACOC_0000481001-mRNA-1
Biological Process	GO:0043170	macromolecule metabolic process	MSTRG.4521.1
Biological Process	GO:0043170	macromolecule metabolic process	MSTRG.4730.1
Biological Process	GO:0043170	macromolecule metabolic process	transcript_ACOC_0000090201-mRNA-1
Biological Process	GO:0043170	macromolecule metabolic process	MSTRG.12561.1
Biological Process	GO:0043170	macromolecule metabolic process	transcript_ACOC_0000476701-mRNA-1
Biological Process	GO:0043170	macromolecule metabolic process	transcript_ACOC_0000932001-mRNA-1
Biological Process	GO:0043170	macromolecule metabolic process	transcript_ACOC_0001124501-mRNA-1
Biological Process	GO:0043170	macromolecule metabolic process	MSTRG.7771.1
Biological Process	GO:0043170	macromolecule metabolic process	transcript_ACOC_0001192801-mRNA-1
Biological Process	GO:0043170	macromolecule metabolic process	MSTRG.4458.3
Biological Process	GO:0043170	macromolecule metabolic process	MSTRG.3418.1
Biological Process	GO:0043170	macromolecule metabolic process	MSTRG.1965.1
Biological Process	GO:0043170	macromolecule metabolic process	MSTRG.10295.2
Biological Process	GO:0043170	macromolecule metabolic process	MSTRG.3418.2
Biological Process	GO:0043170	macromolecule metabolic process	transcript_ACOC_0000766001-mRNA-1
Biological Process	GO:0043170	macromolecule metabolic process	MSTRG.10501.1
Biological Process	GO:0043170	macromolecule metabolic process	MSTRG.3199.1
Biological Process	GO:0043170	macromolecule metabolic process	MSTRG.10086.2
Biological Process	GO:0043170	macromolecule metabolic process	MSTRG.8270.1
Biological Process	GO:0043170	macromolecule metabolic process	MSTRG.11761.1
Biological Process	GO:0043170	macromolecule metabolic process	transcript_ACOC_0000855901-mRNA-1
Biological Process	GO:0043170	macromolecule metabolic process	MSTRG.11761.2
Biological Process	GO:0043170	macromolecule metabolic process	MSTRG.13060.1
Biological Process	GO:0043170	macromolecule metabolic process	transcript_ACOC_0000618801-mRNA-1
Biological Process	GO:0043170	macromolecule metabolic process	transcript_ACOC_0001131301-mRNA-1
Biological Process	GO:0043170	macromolecule metabolic process	transcript_ACOC_0000532001-mRNA-1
Biological Process	GO:0043170	macromolecule metabolic process	MSTRG.10086.1
Biological Process	GO:0043170	macromolecule metabolic process	transcript_ACOC_0000834101-mRNA-1
Biological Process	GO:0043170	macromolecule metabolic process	MSTRG.3418.3
Biological Process	GO:0043170	macromolecule metabolic process	MSTRG.10295.1
Biological Process	GO:0043170	macromolecule metabolic process	transcript_ACOC_0000605001-mRNA-1
Biological Process	GO:0043170	macromolecule metabolic process	MSTRG.10162.4
Biological Process	GO:0043170	macromolecule metabolic process	MSTRG.10438.1
Biological Process	GO:0043170	macromolecule metabolic process	MSTRG.10162.6
Biological Process	GO:0043170	macromolecule metabolic process	MSTRG.10162.5
Biological Process	GO:0043170	macromolecule metabolic process	MSTRG.11489.1
Biological Process	GO:0043170	macromolecule metabolic process	MSTRG.12868.1
Biological Process	GO:0043170	macromolecule metabolic process	transcript_ACOC_0000197301-mRNA-1
Biological Process	GO:0043170	macromolecule metabolic process	transcript_ACOC_0000129601-mRNA-1
Biological Process	GO:0043170	macromolecule metabolic process	transcript_ACOC_0001156901-mRNA-1
Biological Process	GO:0043170	macromolecule metabolic process	MSTRG.10162.2
Biological Process	GO:0043170	macromolecule metabolic process	transcript_ACOC_0000590701-mRNA-1
Biological Process	GO:0043170	macromolecule metabolic process	MSTRG.10162.1
Biological Process	GO:0043170	macromolecule metabolic process	transcript_ACOC_0000261601-mRNA-1
Biological Process	GO:0043170	macromolecule metabolic process	transcript_ACOC_0000566501-mRNA-1
Biological Process	GO:0043170	macromolecule metabolic process	transcript_ACOC_0001227801-mRNA-1
Biological Process	GO:0043170	macromolecule metabolic process	transcript_ACOC_0000915001-mRNA-1
Biological Process	GO:0043170	macromolecule metabolic process	MSTRG.7442.1
Biological Process	GO:0043170	macromolecule metabolic process	transcript_ACOC_0000450501-mRNA-1
Biological Process	GO:0043170	macromolecule metabolic process	MSTRG.11356.1
Biological Process	GO:0043170	macromolecule metabolic process	MSTRG.9925.2
Biological Process	GO:0043170	macromolecule metabolic process	MSTRG.4787.1
Biological Process	GO:0043170	macromolecule metabolic process	transcript_ACOC_0000000601-mRNA-1
Biological Process	GO:0043170	macromolecule metabolic process	MSTRG.9925.1
Biological Process	GO:0043170	macromolecule metabolic process	transcript_ACOC_0001249701-mRNA-1
Biological Process	GO:0043170	macromolecule metabolic process	MSTRG.4325.4
Biological Process	GO:0043170	macromolecule metabolic process	transcript_ACOC_0000637401-mRNA-1
Biological Process	GO:0043170	macromolecule metabolic process	transcript_ACOC_0000300101-mRNA-1
Biological Process	GO:0043170	macromolecule metabolic process	transcript_ACOC_0001247601-mRNA-1
Biological Process	GO:0043170	macromolecule metabolic process	transcript_ACOC_0001040601-mRNA-1
Biological Process	GO:0043170	macromolecule metabolic process	transcript_ACOC_0000024201-mRNA-1
Biological Process	GO:0043170	macromolecule metabolic process	MSTRG.6226.1
Biological Process	GO:0043170	macromolecule metabolic process	transcript_ACOC_0000986601-mRNA-1
Biological Process	GO:0043170	macromolecule metabolic process	MSTRG.12419.1
Biological Process	GO:0043170	macromolecule metabolic process	transcript_ACOC_0000311001-mRNA-1
Biological Process	GO:0043170	macromolecule metabolic process	MSTRG.2344.1
Biological Process	GO:0043170	macromolecule metabolic process	transcript_ACOC_0000554801-mRNA-1
Biological Process	GO:0043170	macromolecule metabolic process	MSTRG.1623.1
Biological Process	GO:0043170	macromolecule metabolic process	MSTRG.2803.2
Biological Process	GO:0043170	macromolecule metabolic process	MSTRG.6840.1
Biological Process	GO:0043170	macromolecule metabolic process	MSTRG.6840.2
Biological Process	GO:0043170	macromolecule metabolic process	MSTRG.2344.2
Biological Process	GO:0043170	macromolecule metabolic process	MSTRG.4641.1
Biological Process	GO:0043170	macromolecule metabolic process	transcript_ACOC_0000728401-mRNA-1
Biological Process	GO:0043170	macromolecule metabolic process	transcript_ACOC_0000539801-mRNA-1
Biological Process	GO:0043170	macromolecule metabolic process	transcript_ACOC_0001173901-mRNA-1
Biological Process	GO:0043170	macromolecule metabolic process	transcript_ACOC_0000632801-mRNA-1
Biological Process	GO:0043170	macromolecule metabolic process	MSTRG.7090.1
Biological Process	GO:0043170	macromolecule metabolic process	MSTRG.2803.1
Biological Process	GO:0043170	macromolecule metabolic process	MSTRG.11698.1
Biological Process	GO:0043170	macromolecule metabolic process	MSTRG.233.1
Biological Process	GO:0043170	macromolecule metabolic process	transcript_ACOC_0000027001-mRNA-1
Biological Process	GO:0043170	macromolecule metabolic process	MSTRG.6083.1
Biological Process	GO:0043170	macromolecule metabolic process	MSTRG.9213.1
Biological Process	GO:0043170	macromolecule metabolic process	MSTRG.1050.1
Biological Process	GO:0043170	macromolecule metabolic process	transcript_ACOC_0000063201-mRNA-1
Biological Process	GO:0043170	macromolecule metabolic process	MSTRG.6907.2
Biological Process	GO:0043170	macromolecule metabolic process	MSTRG.6907.1
Biological Process	GO:0043170	macromolecule metabolic process	transcript_ACOC_0001315701-mRNA-1
Biological Process	GO:0043170	macromolecule metabolic process	MSTRG.4445.1
Biological Process	GO:0043170	macromolecule metabolic process	transcript_ACOC_0000174901-mRNA-1
Biological Process	GO:0043170	macromolecule metabolic process	transcript_ACOC_0000962101-mRNA-1
Biological Process	GO:0043170	macromolecule metabolic process	MSTRG.11521.1
Biological Process	GO:0043170	macromolecule metabolic process	transcript_ACOC_0000194501-mRNA-1
Biological Process	GO:0043170	macromolecule metabolic process	MSTRG.11521.2
Biological Process	GO:0043170	macromolecule metabolic process	MSTRG.3943.1
Biological Process	GO:0043170	macromolecule metabolic process	transcript_ACOC_0000463201-mRNA-1
Biological Process	GO:0043170	macromolecule metabolic process	transcript_ACOC_0001147101-mRNA-1
Biological Process	GO:0043170	macromolecule metabolic process	transcript_ACOC_0001053301-mRNA-1
Biological Process	GO:0043170	macromolecule metabolic process	MSTRG.11249.1
Biological Process	GO:0043170	macromolecule metabolic process	MSTRG.4774.1
Biological Process	GO:0043170	macromolecule metabolic process	transcript_ACOC_0000322801-mRNA-1
Biological Process	GO:0043170	macromolecule metabolic process	transcript_ACOC_0000096601-mRNA-1
Biological Process	GO:0043170	macromolecule metabolic process	MSTRG.5506.1
Biological Process	GO:0043170	macromolecule metabolic process	MSTRG.5363.1
Biological Process	GO:0043170	macromolecule metabolic process	transcript_ACOC_0001131601-mRNA-1
Biological Process	GO:0043170	macromolecule metabolic process	MSTRG.2002.1
Biological Process	GO:0043170	macromolecule metabolic process	transcript_ACOC_0000325601-mRNA-1
Biological Process	GO:0043170	macromolecule metabolic process	transcript_ACOC_0000254701-mRNA-1
Biological Process	GO:0043170	macromolecule metabolic process	transcript_ACOC_0001202501-mRNA-1
Biological Process	GO:0043170	macromolecule metabolic process	MSTRG.113.1
Biological Process	GO:0043170	macromolecule metabolic process	transcript_ACOC_0000935101-mRNA-1
Biological Process	GO:0043170	macromolecule metabolic process	MSTRG.8669.1
Biological Process	GO:0043170	macromolecule metabolic process	transcript_ACOC_0000272801-mRNA-1
Biological Process	GO:0043170	macromolecule metabolic process	MSTRG.2268.1
Biological Process	GO:0043170	macromolecule metabolic process	MSTRG.6292.2
Biological Process	GO:0043170	macromolecule metabolic process	transcript_ACOC_0000716701-mRNA-1
Biological Process	GO:0043170	macromolecule metabolic process	MSTRG.4970.3
Biological Process	GO:0043170	macromolecule metabolic process	MSTRG.5702.1
Biological Process	GO:0043170	macromolecule metabolic process	MSTRG.1610.2
Biological Process	GO:0043170	macromolecule metabolic process	MSTRG.2540.1
Biological Process	GO:0043170	macromolecule metabolic process	MSTRG.2540.3
Biological Process	GO:0043170	macromolecule metabolic process	MSTRG.6292.1
Biological Process	GO:0043170	macromolecule metabolic process	MSTRG.2540.2
Biological Process	GO:0043170	macromolecule metabolic process	transcript_ACOC_0000036201-mRNA-1
Biological Process	GO:0043170	macromolecule metabolic process	transcript_ACOC_0000507101-mRNA-1
Biological Process	GO:0043170	macromolecule metabolic process	transcript_ACOC_0000893801-mRNA-1
Biological Process	GO:0043170	macromolecule metabolic process	transcript_ACOC_0000051501-mRNA-1
Biological Process	GO:0043170	macromolecule metabolic process	transcript_ACOC_0000454001-mRNA-1
Biological Process	GO:0043170	macromolecule metabolic process	MSTRG.7486.1
Biological Process	GO:0043170	macromolecule metabolic process	MSTRG.8998.1
Biological Process	GO:0043170	macromolecule metabolic process	MSTRG.8998.2
Biological Process	GO:0043170	macromolecule metabolic process	MSTRG.6239.2
Biological Process	GO:0043170	macromolecule metabolic process	MSTRG.6239.1
Biological Process	GO:0043170	macromolecule metabolic process	MSTRG.8669.6
Biological Process	GO:0043170	macromolecule metabolic process	MSTRG.6568.1
Biological Process	GO:0043170	macromolecule metabolic process	transcript_ACOC_0001013601-mRNA-1
Biological Process	GO:0043170	macromolecule metabolic process	MSTRG.6239.3
Biological Process	GO:0043170	macromolecule metabolic process	MSTRG.1743.1
Biological Process	GO:0043170	macromolecule metabolic process	MSTRG.4917.2
Biological Process	GO:0043170	macromolecule metabolic process	transcript_ACOC_0000456901-mRNA-1
Biological Process	GO:0043170	macromolecule metabolic process	MSTRG.8669.3
Biological Process	GO:0043170	macromolecule metabolic process	MSTRG.8669.2
Biological Process	GO:0043170	macromolecule metabolic process	MSTRG.9333.1
Biological Process	GO:0043170	macromolecule metabolic process	transcript_ACOC_0000149701-mRNA-1
Biological Process	GO:0043170	macromolecule metabolic process	transcript_ACOC_0000817401-mRNA-1
Biological Process	GO:0043170	macromolecule metabolic process	transcript_ACOC_0001108401-mRNA-1
Biological Process	GO:0043170	macromolecule metabolic process	MSTRG.868.4
Biological Process	GO:0043170	macromolecule metabolic process	transcript_ACOC_0001037501-mRNA-1
Biological Process	GO:0043170	macromolecule metabolic process	MSTRG.868.1
Biological Process	GO:0043170	macromolecule metabolic process	transcript_ACOC_0001111801-mRNA-1
Biological Process	GO:0043170	macromolecule metabolic process	MSTRG.868.2
Biological Process	GO:0043170	macromolecule metabolic process	MSTRG.615.1
Biological Process	GO:0043170	macromolecule metabolic process	transcript_ACOC_0001327701-mRNA-1
Biological Process	GO:0043170	macromolecule metabolic process	transcript_ACOC_0000207601-mRNA-1
Biological Process	GO:0043170	macromolecule metabolic process	MSTRG.9992.1
Biological Process	GO:0043170	macromolecule metabolic process	transcript_ACOC_0000178401-mRNA-1
Biological Process	GO:0043170	macromolecule metabolic process	transcript_ACOC_0001073101-mRNA-1
Biological Process	GO:0043170	macromolecule metabolic process	MSTRG.11858.1
Biological Process	GO:0043170	macromolecule metabolic process	transcript_ACOC_0001298501-mRNA-1
Biological Process	GO:0043170	macromolecule metabolic process	transcript_ACOC_0000468601-mRNA-1
Biological Process	GO:0043170	macromolecule metabolic process	transcript_ACOC_0000343701-mRNA-1
Biological Process	GO:0043170	macromolecule metabolic process	MSTRG.4285.2
Biological Process	GO:0043170	macromolecule metabolic process	transcript_ACOC_0001095201-mRNA-1
Biological Process	GO:0043170	macromolecule metabolic process	MSTRG.4285.3
Biological Process	GO:0043170	macromolecule metabolic process	transcript_ACOC_0000943201-mRNA-1
Biological Process	GO:0043170	macromolecule metabolic process	MSTRG.4428.1
Biological Process	GO:0043170	macromolecule metabolic process	MSTRG.5184.1
Biological Process	GO:0043170	macromolecule metabolic process	transcript_ACOC_0000046001-mRNA-1
Biological Process	GO:0043170	macromolecule metabolic process	MSTRG.8492.1
Biological Process	GO:0043170	macromolecule metabolic process	transcript_ACOC_0000810501-mRNA-1
Biological Process	GO:0043170	macromolecule metabolic process	transcript_ACOC_0000726401-mRNA-1
Biological Process	GO:0043170	macromolecule metabolic process	MSTRG.5510.1
Biological Process	GO:0043170	macromolecule metabolic process	MSTRG.7485.2
Biological Process	GO:0043170	macromolecule metabolic process	MSTRG.9107.1
Biological Process	GO:0043170	macromolecule metabolic process	transcript_ACOC_0000295201-mRNA-1
Biological Process	GO:0043170	macromolecule metabolic process	MSTRG.4481.1
Biological Process	GO:0043170	macromolecule metabolic process	transcript_ACOC_0000655501-mRNA-1
Biological Process	GO:0043170	macromolecule metabolic process	MSTRG.9160.1
Biological Process	GO:0043170	macromolecule metabolic process	MSTRG.10456.1
Biological Process	GO:0043170	macromolecule metabolic process	MSTRG.10456.2
Biological Process	GO:0043170	macromolecule metabolic process	MSTRG.5380.1
Biological Process	GO:0043170	macromolecule metabolic process	transcript_ACOC_0000219401-mRNA-1
Biological Process	GO:0043170	macromolecule metabolic process	MSTRG.9410.3
Biological Process	GO:0043170	macromolecule metabolic process	MSTRG.9410.2
Biological Process	GO:0043170	macromolecule metabolic process	transcript_ACOC_0000091101-mRNA-1
Biological Process	GO:0043170	macromolecule metabolic process	transcript_ACOC_0000860501-mRNA-1
Biological Process	GO:0043170	macromolecule metabolic process	MSTRG.7988.1
Biological Process	GO:0043170	macromolecule metabolic process	transcript_ACOC_0000016101-mRNA-1
Biological Process	GO:0043170	macromolecule metabolic process	MSTRG.1219.1
Biological Process	GO:0043170	macromolecule metabolic process	MSTRG.12396.1
Biological Process	GO:0043170	macromolecule metabolic process	MSTRG.485.1
Biological Process	GO:0043170	macromolecule metabolic process	MSTRG.4548.2
Biological Process	GO:0043170	macromolecule metabolic process	transcript_ACOC_0001223201-mRNA-1
Biological Process	GO:0043170	macromolecule metabolic process	MSTRG.7824.1
Biological Process	GO:0043170	macromolecule metabolic process	transcript_ACOC_0000942901-mRNA-1
Biological Process	GO:0043170	macromolecule metabolic process	MSTRG.4820.1
Biological Process	GO:0043170	macromolecule metabolic process	MSTRG.4820.2
Biological Process	GO:0043170	macromolecule metabolic process	MSTRG.602.3
Biological Process	GO:0043170	macromolecule metabolic process	MSTRG.12263.1
Biological Process	GO:0043170	macromolecule metabolic process	MSTRG.10892.1
Biological Process	GO:0043170	macromolecule metabolic process	MSTRG.602.1
Biological Process	GO:0043170	macromolecule metabolic process	MSTRG.232.1
Biological Process	GO:0043170	macromolecule metabolic process	MSTRG.12766.1
Biological Process	GO:0043170	macromolecule metabolic process	transcript_ACOC_0000557601-mRNA-1
Biological Process	GO:0043170	macromolecule metabolic process	MSTRG.1076.2
Biological Process	GO:0043170	macromolecule metabolic process	MSTRG.10563.1
Biological Process	GO:0043170	macromolecule metabolic process	MSTRG.1076.1
Biological Process	GO:0043170	macromolecule metabolic process	transcript_ACOC_0001091201-mRNA-1
Biological Process	GO:0043170	macromolecule metabolic process	MSTRG.9214.1
Biological Process	GO:0043170	macromolecule metabolic process	transcript_ACOC_0000974801-mRNA-1
Biological Process	GO:0043170	macromolecule metabolic process	MSTRG.11791.1
Biological Process	GO:0043170	macromolecule metabolic process	MSTRG.735.1
Biological Process	GO:0043170	macromolecule metabolic process	transcript_ACOC_0000348001-mRNA-1
Biological Process	GO:0043170	macromolecule metabolic process	MSTRG.1787.1
Biological Process	GO:0043170	macromolecule metabolic process	transcript_ACOC_0000364101-mRNA-1
Biological Process	GO:0043170	macromolecule metabolic process	transcript_ACOC_0000524901-mRNA-1
Biological Process	GO:0043170	macromolecule metabolic process	MSTRG.2149.1
Biological Process	GO:0043170	macromolecule metabolic process	MSTRG.9543.1
Biological Process	GO:0043170	macromolecule metabolic process	MSTRG.2149.2
Biological Process	GO:0043170	macromolecule metabolic process	transcript_ACOC_0000724401-mRNA-1
Biological Process	GO:0043170	macromolecule metabolic process	transcript_ACOC_0001207101-mRNA-1
Biological Process	GO:0043170	macromolecule metabolic process	transcript_ACOC_0000789001-mRNA-1
Biological Process	GO:0043170	macromolecule metabolic process	transcript_ACOC_0000306401-mRNA-1
Biological Process	GO:0043170	macromolecule metabolic process	transcript_ACOC_0000464001-mRNA-1
Biological Process	GO:0043170	macromolecule metabolic process	MSTRG.3035.2
Biological Process	GO:0043170	macromolecule metabolic process	MSTRG.3035.1
Biological Process	GO:0043170	macromolecule metabolic process	MSTRG.263.1
Biological Process	GO:0043170	macromolecule metabolic process	transcript_ACOC_0001103501-mRNA-1
Biological Process	GO:0043170	macromolecule metabolic process	MSTRG.7396.1
Biological Process	GO:0043170	macromolecule metabolic process	transcript_ACOC_0001009601-mRNA-1
Biological Process	GO:0043170	macromolecule metabolic process	transcript_ACOC_0001036301-mRNA-1
Biological Process	GO:0043170	macromolecule metabolic process	MSTRG.4668.1
Biological Process	GO:0043170	macromolecule metabolic process	MSTRG.4731.2
Biological Process	GO:0043170	macromolecule metabolic process	transcript_ACOC_0001107201-mRNA-1
Biological Process	GO:0043170	macromolecule metabolic process	MSTRG.7855.1
Biological Process	GO:0043170	macromolecule metabolic process	transcript_ACOC_0000350601-mRNA-1
Biological Process	GO:0043170	macromolecule metabolic process	MSTRG.10826.1
Biological Process	GO:0043170	macromolecule metabolic process	transcript_ACOC_0000496501-mRNA-1
Biological Process	GO:0043170	macromolecule metabolic process	MSTRG.10826.2
Biological Process	GO:0043170	macromolecule metabolic process	MSTRG.5870.2
Biological Process	GO:0043170	macromolecule metabolic process	transcript_ACOC_0000502201-mRNA-1
Biological Process	GO:0043170	macromolecule metabolic process	MSTRG.11488.1
Biological Process	GO:0043170	macromolecule metabolic process	transcript_ACOC_0000422401-mRNA-1
Biological Process	GO:0043170	macromolecule metabolic process	transcript_ACOC_0000195601-mRNA-1
Biological Process	GO:0043170	macromolecule metabolic process	MSTRG.2510.1
Biological Process	GO:0043170	macromolecule metabolic process	transcript_ACOC_0000522301-mRNA-1
Biological Process	GO:0043170	macromolecule metabolic process	MSTRG.2314.1
Biological Process	GO:0043170	macromolecule metabolic process	MSTRG.11618.1
Biological Process	GO:0043170	macromolecule metabolic process	transcript_ACOC_0000992901-mRNA-1
Biological Process	GO:0043170	macromolecule metabolic process	transcript_ACOC_0001254801-mRNA-1
Biological Process	GO:0043170	macromolecule metabolic process	MSTRG.10412.1
Biological Process	GO:0043170	macromolecule metabolic process	transcript_ACOC_0001335501-mRNA-1
Biological Process	GO:0043170	macromolecule metabolic process	transcript_ACOC_0000988301-mRNA-1
Biological Process	GO:0043170	macromolecule metabolic process	transcript_ACOC_0000251001-mRNA-1
Biological Process	GO:0043170	macromolecule metabolic process	MSTRG.1894.1
Biological Process	GO:0043170	macromolecule metabolic process	MSTRG.6662.1
Biological Process	GO:0043170	macromolecule metabolic process	transcript_ACOC_0001099801-mRNA-1
Biological Process	GO:0043170	macromolecule metabolic process	transcript_ACOC_0000449701-mRNA-1
Biological Process	GO:0043170	macromolecule metabolic process	MSTRG.8528.1
Biological Process	GO:0043170	macromolecule metabolic process	transcript_ACOC_0000152801-mRNA-1
Biological Process	GO:0043170	macromolecule metabolic process	transcript_ACOC_0000899301-mRNA-1
Biological Process	GO:0043170	macromolecule metabolic process	transcript_ACOC_0000613901-mRNA-1
Biological Process	GO:0043170	macromolecule metabolic process	MSTRG.8528.2
Biological Process	GO:0043170	macromolecule metabolic process	transcript_ACOC_0001334601-mRNA-1
Biological Process	GO:0043170	macromolecule metabolic process	MSTRG.10349.1
Biological Process	GO:0043170	macromolecule metabolic process	MSTRG.7263.1
Biological Process	GO:0043170	macromolecule metabolic process	MSTRG.6599.3
Biological Process	GO:0043170	macromolecule metabolic process	MSTRG.8581.1
Biological Process	GO:0043170	macromolecule metabolic process	transcript_ACOC_0000987401-mRNA-1
Biological Process	GO:0043170	macromolecule metabolic process	transcript_ACOC_0000997201-mRNA-1
Biological Process	GO:0043170	macromolecule metabolic process	MSTRG.13043.1
Biological Process	GO:0043170	macromolecule metabolic process	transcript_ACOC_0000711801-mRNA-1
Biological Process	GO:0043170	macromolecule metabolic process	transcript_ACOC_0000052301-mRNA-1
Biological Process	GO:0043170	macromolecule metabolic process	transcript_ACOC_0000656401-mRNA-1
Biological Process	GO:0043170	macromolecule metabolic process	MSTRG.4864.1
Biological Process	GO:0043170	macromolecule metabolic process	transcript_ACOC_0000061201-mRNA-1
Biological Process	GO:0043170	macromolecule metabolic process	MSTRG.11880.2
Biological Process	GO:0043170	macromolecule metabolic process	transcript_ACOC_0000108901-mRNA-1
Biological Process	GO:0043170	macromolecule metabolic process	MSTRG.6466.3
Biological Process	GO:0043170	macromolecule metabolic process	MSTRG.1970.1
Biological Process	GO:0043170	macromolecule metabolic process	transcript_ACOC_0001164101-mRNA-1
Biological Process	GO:0043170	macromolecule metabolic process	transcript_ACOC_0000945801-mRNA-1
Biological Process	GO:0043170	macromolecule metabolic process	MSTRG.5536.2
Biological Process	GO:0043170	macromolecule metabolic process	MSTRG.7592.1
Biological Process	GO:0043170	macromolecule metabolic process	MSTRG.5536.1
Biological Process	GO:0043170	macromolecule metabolic process	MSTRG.2105.3
Biological Process	GO:0043170	macromolecule metabolic process	MSTRG.7130.1
Biological Process	GO:0043170	macromolecule metabolic process	MSTRG.12174.1
Biological Process	GO:0043170	macromolecule metabolic process	MSTRG.11146.1
Biological Process	GO:0043170	macromolecule metabolic process	MSTRG.3969.2
Biological Process	GO:0043170	macromolecule metabolic process	transcript_ACOC_0000223701-mRNA-1
Biological Process	GO:0043170	macromolecule metabolic process	MSTRG.3969.1
Biological Process	GO:0043170	macromolecule metabolic process	transcript_ACOC_0000682501-mRNA-1
Biological Process	GO:0043170	macromolecule metabolic process	MSTRG.7539.1
Biological Process	GO:0043170	macromolecule metabolic process	transcript_ACOC_0001264601-mRNA-1
Biological Process	GO:0043170	macromolecule metabolic process	MSTRG.4535.1
Biological Process	GO:0043170	macromolecule metabolic process	transcript_ACOC_0000253901-mRNA-1
Biological Process	GO:0043170	macromolecule metabolic process	MSTRG.6333.1
Biological Process	GO:0043170	macromolecule metabolic process	MSTRG.3560.1
Biological Process	GO:0043170	macromolecule metabolic process	MSTRG.2896.1
Biological Process	GO:0043170	macromolecule metabolic process	transcript_ACOC_0000378801-mRNA-1
Biological Process	GO:0043170	macromolecule metabolic process	MSTRG.10073.1
Biological Process	GO:0043170	macromolecule metabolic process	MSTRG.1917.1
Biological Process	GO:0043170	macromolecule metabolic process	transcript_ACOC_0001112701-mRNA-1
Biological Process	GO:0043170	macromolecule metabolic process	transcript_ACOC_0000182701-mRNA-1
Biological Process	GO:0043170	macromolecule metabolic process	MSTRG.4330.1
Biological Process	GO:0043170	macromolecule metabolic process	transcript_ACOC_0000235801-mRNA-1
Biological Process	GO:0043170	macromolecule metabolic process	MSTRG.4583.1
Biological Process	GO:0043170	macromolecule metabolic process	transcript_ACOC_0000836101-mRNA-1
Biological Process	GO:0043170	macromolecule metabolic process	transcript_ACOC_0001275501-mRNA-1
Biological Process	GO:0043170	macromolecule metabolic process	transcript_ACOC_0000159701-mRNA-1
Biological Process	GO:0043170	macromolecule metabolic process	transcript_ACOC_0000535801-mRNA-1
Biological Process	GO:0043170	macromolecule metabolic process	MSTRG.6823.2
Biological Process	GO:0043170	macromolecule metabolic process	transcript_ACOC_0000103401-mRNA-1
Biological Process	GO:0043170	macromolecule metabolic process	transcript_ACOC_0001125301-mRNA-1
Biological Process	GO:0043170	macromolecule metabolic process	MSTRG.6111.1
Biological Process	GO:0043170	macromolecule metabolic process	transcript_ACOC_0001054401-mRNA-1
Biological Process	GO:0043170	macromolecule metabolic process	MSTRG.8461.1
Biological Process	GO:0043170	macromolecule metabolic process	MSTRG.5794.1
Biological Process	GO:0043170	macromolecule metabolic process	transcript_ACOC_0000469501-mRNA-1
Biological Process	GO:0043170	macromolecule metabolic process	MSTRG.7646.1
Biological Process	GO:0043170	macromolecule metabolic process	transcript_ACOC_0001072201-mRNA-1
Biological Process	GO:0043170	macromolecule metabolic process	transcript_ACOC_0000783001-mRNA-1
Biological Process	GO:0043170	macromolecule metabolic process	transcript_ACOC_0001154901-mRNA-1
Biological Process	GO:0043170	macromolecule metabolic process	MSTRG.250.1
Biological Process	GO:0043170	macromolecule metabolic process	transcript_ACOC_0000337101-mRNA-1
Biological Process	GO:0043170	macromolecule metabolic process	MSTRG.250.2
Biological Process	GO:0043170	macromolecule metabolic process	transcript_ACOC_0001143101-mRNA-1
Biological Process	GO:0043170	macromolecule metabolic process	MSTRG.7513.1
Biological Process	GO:0043170	macromolecule metabolic process	transcript_ACOC_0001295601-mRNA-1
Biological Process	GO:0043170	macromolecule metabolic process	transcript_ACOC_0000856201-mRNA-1
Biological Process	GO:0043170	macromolecule metabolic process	transcript_ACOC_0001241301-mRNA-1
Biological Process	GO:0043170	macromolecule metabolic process	MSTRG.10354.1
Biological Process	GO:0043170	macromolecule metabolic process	MSTRG.11889.1
Biological Process	GO:0043170	macromolecule metabolic process	transcript_ACOC_0000224001-mRNA-1
Biological Process	GO:0043170	macromolecule metabolic process	MSTRG.8265.1
Biological Process	GO:0043170	macromolecule metabolic process	transcript_ACOC_0000319301-mRNA-1
Biological Process	GO:0043170	macromolecule metabolic process	transcript_ACOC_0000230001-mRNA-1
Biological Process	GO:0043170	macromolecule metabolic process	MSTRG.5225.1
Biological Process	GO:0043170	macromolecule metabolic process	transcript_ACOC_0000108001-mRNA-1
Biological Process	GO:0043170	macromolecule metabolic process	transcript_ACOC_0001312201-mRNA-1
Biological Process	GO:0043170	macromolecule metabolic process	MSTRG.68.1
Biological Process	GO:0043170	macromolecule metabolic process	MSTRG.9721.3
Biological Process	GO:0043170	macromolecule metabolic process	MSTRG.9721.1
Biological Process	GO:0043170	macromolecule metabolic process	transcript_ACOC_0000762601-mRNA-1
Biological Process	GO:0043170	macromolecule metabolic process	transcript_ACOC_0000030501-mRNA-1
Biological Process	GO:0043170	macromolecule metabolic process	MSTRG.10861.1
Biological Process	GO:0043170	macromolecule metabolic process	transcript_ACOC_0000321901-mRNA-1
Biological Process	GO:0043170	macromolecule metabolic process	MSTRG.4254.1
Biological Process	GO:0043170	macromolecule metabolic process	MSTRG.4922.1
Biological Process	GO:0043170	macromolecule metabolic process	MSTRG.8750.1
Biological Process	GO:0043170	macromolecule metabolic process	MSTRG.8750.2
Biological Process	GO:0043170	macromolecule metabolic process	MSTRG.3070.1
Biological Process	GO:0043170	macromolecule metabolic process	MSTRG.130.1
Biological Process	GO:0043170	macromolecule metabolic process	transcript_ACOC_0001048401-mRNA-1
Biological Process	GO:0043170	macromolecule metabolic process	transcript_ACOC_0001277501-mRNA-1
Biological Process	GO:0043170	macromolecule metabolic process	transcript_ACOC_0001066201-mRNA-1
Biological Process	GO:0043170	macromolecule metabolic process	MSTRG.8278.1
Biological Process	GO:0043170	macromolecule metabolic process	transcript_ACOC_0000847901-mRNA-1
Biological Process	GO:0043170	macromolecule metabolic process	transcript_ACOC_0000582901-mRNA-1
Biological Process	GO:0043170	macromolecule metabolic process	MSTRG.1552.1
Biological Process	GO:0043170	macromolecule metabolic process	MSTRG.11000.1
Biological Process	GO:0043170	macromolecule metabolic process	MSTRG.1178.2
Biological Process	GO:0043170	macromolecule metabolic process	MSTRG.962.2
Biological Process	GO:0043170	macromolecule metabolic process	transcript_ACOC_0000380201-mRNA-1
Biological Process	GO:0043170	macromolecule metabolic process	transcript_ACOC_0000415501-mRNA-1
Biological Process	GO:0043170	macromolecule metabolic process	MSTRG.8145.1
Biological Process	GO:0043170	macromolecule metabolic process	transcript_ACOC_0000722701-mRNA-1
Biological Process	GO:0043170	macromolecule metabolic process	transcript_ACOC_0000644601-mRNA-1
Biological Process	GO:0043170	macromolecule metabolic process	MSTRG.11832.1
Biological Process	GO:0043170	macromolecule metabolic process	transcript_ACOC_0001305901-mRNA-1
Biological Process	GO:0043170	macromolecule metabolic process	MSTRG.6377.1
Biological Process	GO:0043170	macromolecule metabolic process	MSTRG.2077.4
Biological Process	GO:0043170	macromolecule metabolic process	MSTRG.4726.1
Biological Process	GO:0043170	macromolecule metabolic process	transcript_ACOC_0000522001-mRNA-1
Biological Process	GO:0043170	macromolecule metabolic process	MSTRG.1881.1
Biological Process	GO:0043170	macromolecule metabolic process	MSTRG.7174.1
Biological Process	GO:0043170	macromolecule metabolic process	transcript_ACOC_0000068701-mRNA-1
Biological Process	GO:0043170	macromolecule metabolic process	MSTRG.12633.2
Biological Process	GO:0043170	macromolecule metabolic process	MSTRG.1178.1
Biological Process	GO:0043170	macromolecule metabolic process	MSTRG.187.1
Biological Process	GO:0043170	macromolecule metabolic process	MSTRG.7294.1
Biological Process	GO:0043170	macromolecule metabolic process	MSTRG.2985.1
Biological Process	GO:0043170	macromolecule metabolic process	MSTRG.7500.1
Biological Process	GO:0043170	macromolecule metabolic process	MSTRG.975.1
Biological Process	GO:0043170	macromolecule metabolic process	MSTRG.1815.1
Biological Process	GO:0043170	macromolecule metabolic process	MSTRG.5554.1
Biological Process	GO:0043170	macromolecule metabolic process	MSTRG.1815.2
Biological Process	GO:0043170	macromolecule metabolic process	MSTRG.5291.1
Biological Process	GO:0043170	macromolecule metabolic process	MSTRG.2536.1
Biological Process	GO:0043170	macromolecule metabolic process	MSTRG.9591.1
Biological Process	GO:0043170	macromolecule metabolic process	transcript_ACOC_0001068801-mRNA-1
Biological Process	GO:0043170	macromolecule metabolic process	transcript_ACOC_0000756001-mRNA-1
Biological Process	GO:0043170	macromolecule metabolic process	transcript_ACOC_0000769801-mRNA-1
Biological Process	GO:0043170	macromolecule metabolic process	transcript_ACOC_0000571101-mRNA-1
Biological Process	GO:0043170	macromolecule metabolic process	transcript_ACOC_0000591801-mRNA-1
Biological Process	GO:0043170	macromolecule metabolic process	transcript_ACOC_0000876901-mRNA-1
Biological Process	GO:0043170	macromolecule metabolic process	transcript_ACOC_0000424101-mRNA-1
Biological Process	GO:0043170	macromolecule metabolic process	MSTRG.37.1
Biological Process	GO:0043170	macromolecule metabolic process	MSTRG.855.1
Biological Process	GO:0043170	macromolecule metabolic process	transcript_ACOC_0000715801-mRNA-1
Biological Process	GO:0043170	macromolecule metabolic process	transcript_ACOC_0000642001-mRNA-1
Biological Process	GO:0043170	macromolecule metabolic process	MSTRG.5919.1
Biological Process	GO:0043170	macromolecule metabolic process	MSTRG.6440.1
Biological Process	GO:0043170	macromolecule metabolic process	MSTRG.8870.1
Biological Process	GO:0043170	macromolecule metabolic process	transcript_ACOC_0000671601-mRNA-1
Biological Process	GO:0043170	macromolecule metabolic process	transcript_ACOC_0000667301-mRNA-1
Biological Process	GO:0043170	macromolecule metabolic process	transcript_ACOC_0000680501-mRNA-1
Biological Process	GO:0043170	macromolecule metabolic process	MSTRG.11582.1
Biological Process	GO:0043170	macromolecule metabolic process	transcript_ACOC_0000974501-mRNA-1
Biological Process	GO:0043170	macromolecule metabolic process	MSTRG.8817.2
Biological Process	GO:0043170	macromolecule metabolic process	MSTRG.8817.1
Biological Process	GO:0043170	macromolecule metabolic process	MSTRG.1672.1
Biological Process	GO:0043170	macromolecule metabolic process	MSTRG.7886.3
Biological Process	GO:0043170	macromolecule metabolic process	MSTRG.6716.1
Biological Process	GO:0043170	macromolecule metabolic process	MSTRG.4517.1
Biological Process	GO:0043170	macromolecule metabolic process	MSTRG.9395.1
Biological Process	GO:0043170	macromolecule metabolic process	transcript_ACOC_0000012701-mRNA-1
Biological Process	GO:0043170	macromolecule metabolic process	transcript_ACOC_0000751401-mRNA-1
Biological Process	GO:0043170	macromolecule metabolic process	MSTRG.11582.2
Biological Process	GO:0043170	macromolecule metabolic process	MSTRG.11725.1
Biological Process	GO:0043170	macromolecule metabolic process	MSTRG.11725.3
Biological Process	GO:0043170	macromolecule metabolic process	transcript_ACOC_0000480101-mRNA-1
Biological Process	GO:0043170	macromolecule metabolic process	MSTRG.12544.1
Biological Process	GO:0043170	macromolecule metabolic process	transcript_ACOC_0001052401-mRNA-1
Biological Process	GO:0043170	macromolecule metabolic process	MSTRG.11516.2
Biological Process	GO:0043170	macromolecule metabolic process	transcript_ACOC_0000524001-mRNA-1
Biological Process	GO:0043170	macromolecule metabolic process	transcript_ACOC_0000551001-mRNA-1
Biological Process	GO:0043170	macromolecule metabolic process	transcript_ACOC_0000838101-mRNA-1
Biological Process	GO:0043170	macromolecule metabolic process	transcript_ACOC_0000175501-mRNA-1
Biological Process	GO:0043170	macromolecule metabolic process	transcript_ACOC_0000533201-mRNA-1
Biological Process	GO:0043170	macromolecule metabolic process	MSTRG.4713.2
Biological Process	GO:0043170	macromolecule metabolic process	MSTRG.1739.1
Biological Process	GO:0043170	macromolecule metabolic process	MSTRG.8794.1
Biological Process	GO:0043170	macromolecule metabolic process	MSTRG.3938.1
Biological Process	GO:0043170	macromolecule metabolic process	MSTRG.4713.1
Biological Process	GO:0043170	macromolecule metabolic process	MSTRG.3938.2
Biological Process	GO:0043170	macromolecule metabolic process	MSTRG.8487.1
Biological Process	GO:0043170	macromolecule metabolic process	transcript_ACOC_0001212301-mRNA-1
Biological Process	GO:0043170	macromolecule metabolic process	MSTRG.4504.1
Biological Process	GO:0043170	macromolecule metabolic process	MSTRG.2612.1
Biological Process	GO:0043170	macromolecule metabolic process	MSTRG.1596.1
Biological Process	GO:0043170	macromolecule metabolic process	MSTRG.11044.1
Biological Process	GO:0043170	macromolecule metabolic process	MSTRG.646.1
Biological Process	GO:0043170	macromolecule metabolic process	MSTRG.6836.1
Biological Process	GO:0043170	macromolecule metabolic process	MSTRG.5763.2
Biological Process	GO:0043170	macromolecule metabolic process	MSTRG.370.1
Biological Process	GO:0043170	macromolecule metabolic process	transcript_ACOC_0001239601-mRNA-1
Biological Process	GO:0043170	macromolecule metabolic process	transcript_ACOC_0000184701-mRNA-1
Biological Process	GO:0043170	macromolecule metabolic process	MSTRG.6969.1
Biological Process	GO:0043170	macromolecule metabolic process	MSTRG.1134.1
Biological Process	GO:0043170	macromolecule metabolic process	transcript_ACOC_0000453401-mRNA-1
Biological Process	GO:0043170	macromolecule metabolic process	MSTRG.2260.2
Biological Process	GO:0043170	macromolecule metabolic process	MSTRG.5434.2
Biological Process	GO:0043170	macromolecule metabolic process	MSTRG.2260.1
Biological Process	GO:0043170	macromolecule metabolic process	MSTRG.5434.1
Biological Process	GO:0043170	macromolecule metabolic process	MSTRG.578.1
Biological Process	GO:0043170	macromolecule metabolic process	MSTRG.9472.1
Biological Process	GO:0043170	macromolecule metabolic process	MSTRG.8924.1
Biological Process	GO:0043170	macromolecule metabolic process	MSTRG.7819.1
Biological Process	GO:0043170	macromolecule metabolic process	MSTRG.8924.3
Biological Process	GO:0043170	macromolecule metabolic process	MSTRG.9931.1
Biological Process	GO:0043170	macromolecule metabolic process	MSTRG.12816.1
Biological Process	GO:0043170	macromolecule metabolic process	MSTRG.8367.1
Biological Process	GO:0043170	macromolecule metabolic process	MSTRG.7819.2
Biological Process	GO:0043170	macromolecule metabolic process	transcript_ACOC_0000932401-mRNA-1
Biological Process	GO:0043170	macromolecule metabolic process	MSTRG.10757.1
Biological Process	GO:0043170	macromolecule metabolic process	transcript_ACOC_0001106601-mRNA-1
Biological Process	GO:0043170	macromolecule metabolic process	MSTRG.10045.1
Biological Process	GO:0043170	macromolecule metabolic process	MSTRG.9868.1
Biological Process	GO:0043170	macromolecule metabolic process	MSTRG.1256.1
Biological Process	GO:0043170	macromolecule metabolic process	MSTRG.4455.1
Biological Process	GO:0043170	macromolecule metabolic process	MSTRG.8563.3
Biological Process	GO:0043170	macromolecule metabolic process	MSTRG.8563.2
Biological Process	GO:0043170	macromolecule metabolic process	MSTRG.8563.1
Biological Process	GO:0043170	macromolecule metabolic process	MSTRG.9931.7
Biological Process	GO:0043170	macromolecule metabolic process	transcript_ACOC_0000735201-mRNA-1
Biological Process	GO:0043170	macromolecule metabolic process	MSTRG.9931.8
Biological Process	GO:0043170	macromolecule metabolic process	MSTRG.2659.1
Biological Process	GO:0043170	macromolecule metabolic process	MSTRG.10820.2
Biological Process	GO:0043170	macromolecule metabolic process	MSTRG.9931.5
Biological Process	GO:0043170	macromolecule metabolic process	transcript_ACOC_0000615601-mRNA-1
Biological Process	GO:0043170	macromolecule metabolic process	transcript_ACOC_0000744701-mRNA-1
Biological Process	GO:0043170	macromolecule metabolic process	MSTRG.9931.6
Biological Process	GO:0043170	macromolecule metabolic process	transcript_ACOC_0000067101-mRNA-1
Biological Process	GO:0043170	macromolecule metabolic process	MSTRG.6985.1
Biological Process	GO:0043170	macromolecule metabolic process	transcript_ACOC_0001281101-mRNA-1
Biological Process	GO:0043170	macromolecule metabolic process	transcript_ACOC_0000790101-mRNA-1
Biological Process	GO:0043170	macromolecule metabolic process	MSTRG.8310.1
Biological Process	GO:0043170	macromolecule metabolic process	MSTRG.8728.1
Biological Process	GO:0043170	macromolecule metabolic process	MSTRG.2396.1
Biological Process	GO:0043170	macromolecule metabolic process	MSTRG.6020.1
Biological Process	GO:0043170	macromolecule metabolic process	transcript_ACOC_0001112801-mRNA-1
Biological Process	GO:0043170	macromolecule metabolic process	MSTRG.9276.1
Biological Process	GO:0043170	macromolecule metabolic process	transcript_ACOC_0000212801-mRNA-1
Biological Process	GO:0043170	macromolecule metabolic process	transcript_ACOC_0000621801-mRNA-1
Biological Process	GO:0043170	macromolecule metabolic process	MSTRG.11631.1
Biological Process	GO:0043170	macromolecule metabolic process	transcript_ACOC_0000603301-mRNA-1
Biological Process	GO:0043170	macromolecule metabolic process	transcript_ACOC_0000781101-mRNA-1
Biological Process	GO:0043170	macromolecule metabolic process	MSTRG.2526.1
Biological Process	GO:0043170	macromolecule metabolic process	MSTRG.11448.2
Biological Process	GO:0043170	macromolecule metabolic process	transcript_ACOC_0000661501-mRNA-1
Biological Process	GO:0043170	macromolecule metabolic process	transcript_ACOC_0000215101-mRNA-1
Biological Process	GO:0043170	macromolecule metabolic process	MSTRG.4914.2
Biological Process	GO:0043170	macromolecule metabolic process	MSTRG.7939.1
Biological Process	GO:0043170	macromolecule metabolic process	MSTRG.11448.1
Biological Process	GO:0043170	macromolecule metabolic process	MSTRG.11185.1
Biological Process	GO:0043170	macromolecule metabolic process	transcript_ACOC_0001035201-mRNA-1
Biological Process	GO:0043170	macromolecule metabolic process	transcript_ACOC_0001084401-mRNA-1
Biological Process	GO:0043170	macromolecule metabolic process	transcript_ACOC_0000652001-mRNA-1
Biological Process	GO:0043170	macromolecule metabolic process	MSTRG.1332.1
Biological Process	GO:0043170	macromolecule metabolic process	MSTRG.9539.1
Biological Process	GO:0043170	macromolecule metabolic process	MSTRG.6789.1
Biological Process	GO:0043170	macromolecule metabolic process	transcript_ACOC_0000643001-mRNA-1
Biological Process	GO:0043170	macromolecule metabolic process	MSTRG.6286.1
Biological Process	GO:0043170	macromolecule metabolic process	MSTRG.6033.1
Biological Process	GO:0043170	macromolecule metabolic process	MSTRG.3283.1
Biological Process	GO:0043170	macromolecule metabolic process	transcript_ACOC_0000381601-mRNA-1
Biological Process	GO:0043170	macromolecule metabolic process	MSTRG.5595.1
Biological Process	GO:0043170	macromolecule metabolic process	MSTRG.11644.1
Biological Process	GO:0043170	macromolecule metabolic process	MSTRG.761.1
Biological Process	GO:0043170	macromolecule metabolic process	MSTRG.2988.2
Biological Process	GO:0043170	macromolecule metabolic process	MSTRG.11897.2
Biological Process	GO:0043170	macromolecule metabolic process	MSTRG.7752.1
Biological Process	GO:0043170	macromolecule metabolic process	MSTRG.5738.1
Biological Process	GO:0043170	macromolecule metabolic process	MSTRG.970.1
Biological Process	GO:0043170	macromolecule metabolic process	MSTRG.1835.3
Biological Process	GO:0043170	macromolecule metabolic process	MSTRG.11897.1
Biological Process	GO:0043170	macromolecule metabolic process	transcript_ACOC_0000772101-mRNA-1
Biological Process	GO:0043170	macromolecule metabolic process	MSTRG.7227.2
Biological Process	GO:0043170	macromolecule metabolic process	MSTRG.708.1
Biological Process	GO:0043170	macromolecule metabolic process	MSTRG.11840.1
Biological Process	GO:0043170	macromolecule metabolic process	MSTRG.401.2
Biological Process	GO:0043170	macromolecule metabolic process	transcript_ACOC_0000520101-mRNA-1
Biological Process	GO:0043170	macromolecule metabolic process	MSTRG.7689.2
Biological Process	GO:0043170	macromolecule metabolic process	transcript_ACOC_0000630801-mRNA-1
Biological Process	GO:0043170	macromolecule metabolic process	MSTRG.5791.1
Biological Process	GO:0043170	macromolecule metabolic process	MSTRG.7689.1
Biological Process	GO:0043170	macromolecule metabolic process	MSTRG.8848.1
Biological Process	GO:0043170	macromolecule metabolic process	MSTRG.4379.1
Biological Process	GO:0043170	macromolecule metabolic process	MSTRG.7556.1
Biological Process	GO:0043170	macromolecule metabolic process	transcript_ACOC_0000117201-mRNA-1
Biological Process	GO:0043170	macromolecule metabolic process	MSTRG.7556.2
Biological Process	GO:0043170	macromolecule metabolic process	transcript_ACOC_0000996201-mRNA-1
Biological Process	GO:0043170	macromolecule metabolic process	MSTRG.10374.1
Biological Process	GO:0043170	macromolecule metabolic process	transcript_ACOC_0000735701-mRNA-1
Biological Process	GO:0043170	macromolecule metabolic process	transcript_ACOC_0000956501-mRNA-1
Biological Process	GO:0043170	macromolecule metabolic process	MSTRG.1465.1
Biological Process	GO:0043170	macromolecule metabolic process	transcript_ACOC_0001029501-mRNA-1
Biological Process	GO:0043170	macromolecule metabolic process	transcript_ACOC_0000867601-mRNA-1
Biological Process	GO:0043170	macromolecule metabolic process	transcript_ACOC_0000488901-mRNA-1
Biological Process	GO:0043170	macromolecule metabolic process	MSTRG.1911.1
Biological Process	GO:0043170	macromolecule metabolic process	transcript_ACOC_0000827401-mRNA-1
Biological Process	GO:0043170	macromolecule metabolic process	transcript_ACOC_0001090101-mRNA-1
Biological Process	GO:0043170	macromolecule metabolic process	MSTRG.9811.1
Biological Process	GO:0043170	macromolecule metabolic process	transcript_ACOC_0000159801-mRNA-1
Biological Process	GO:0043170	macromolecule metabolic process	MSTRG.7885.2
Biological Process	GO:0043170	macromolecule metabolic process	transcript_ACOC_0000775401-mRNA-1
Biological Process	GO:0043170	macromolecule metabolic process	MSTRG.7885.1
Biological Process	GO:0043170	macromolecule metabolic process	transcript_ACOC_0000199501-mRNA-1
Biological Process	GO:0043170	macromolecule metabolic process	MSTRG.10877.1
Biological Process	GO:0043170	macromolecule metabolic process	MSTRG.1149.1
Biological Process	GO:0043170	macromolecule metabolic process	MSTRG.10611.1
Biological Process	GO:0043170	macromolecule metabolic process	MSTRG.534.1
Biological Process	GO:0043170	macromolecule metabolic process	MSTRG.8968.1
Biological Process	GO:0043170	macromolecule metabolic process	transcript_ACOC_0000637301-mRNA-1
Biological Process	GO:0043170	macromolecule metabolic process	MSTRG.8323.1
Biological Process	GO:0043170	macromolecule metabolic process	transcript_ACOC_0000645901-mRNA-1
Biological Process	GO:0043170	macromolecule metabolic process	transcript_ACOC_0000769201-mRNA-1
Biological Process	GO:0043170	macromolecule metabolic process	transcript_ACOC_0000298301-mRNA-1
Biological Process	GO:0043170	macromolecule metabolic process	transcript_ACOC_0001060801-mRNA-1
Biological Process	GO:0043170	macromolecule metabolic process	MSTRG.4509.2
Biological Process	GO:0043170	macromolecule metabolic process	MSTRG.6625.1
Biological Process	GO:0043170	macromolecule metabolic process	transcript_ACOC_0001054101-mRNA-1
Biological Process	GO:0043170	macromolecule metabolic process	MSTRG.6878.1
Biological Process	GO:0043170	macromolecule metabolic process	MSTRG.4509.1
Biological Process	GO:0043170	macromolecule metabolic process	transcript_ACOC_0000119601-mRNA-1
Biological Process	GO:0043170	macromolecule metabolic process	transcript_ACOC_0001005401-mRNA-1
Biological Process	GO:0043170	macromolecule metabolic process	transcript_ACOC_0000569201-mRNA-1
Biological Process	GO:0043170	macromolecule metabolic process	MSTRG.6207.1
Biological Process	GO:0043170	macromolecule metabolic process	transcript_ACOC_0000168301-mRNA-1
Biological Process	GO:0043170	macromolecule metabolic process	MSTRG.2868.1
Biological Process	GO:0043170	macromolecule metabolic process	transcript_ACOC_0000691801-mRNA-1
Biological Process	GO:0043170	macromolecule metabolic process	MSTRG.10611.2
Biological Process	GO:0043170	macromolecule metabolic process	MSTRG.12148.1
Biological Process	GO:0043170	macromolecule metabolic process	MSTRG.312.1
Biological Process	GO:0043170	macromolecule metabolic process	transcript_ACOC_0001333601-mRNA-1
Biological Process	GO:0043170	macromolecule metabolic process	MSTRG.6758.2
Biological Process	GO:0043170	macromolecule metabolic process	MSTRG.9508.1
Biological Process	GO:0043170	macromolecule metabolic process	MSTRG.6758.1
Biological Process	GO:0043170	macromolecule metabolic process	MSTRG.7806.1
Biological Process	GO:0043170	macromolecule metabolic process	MSTRG.8127.1
Biological Process	GO:0043170	macromolecule metabolic process	MSTRG.6064.1
Biological Process	GO:0043170	macromolecule metabolic process	transcript_ACOC_0001044201-mRNA-1
Biological Process	GO:0043170	macromolecule metabolic process	transcript_ACOC_0000454901-mRNA-1
Biological Process	GO:0043170	macromolecule metabolic process	transcript_ACOC_0000111101-mRNA-1
Biological Process	GO:0043170	macromolecule metabolic process	MSTRG.9232.1
Biological Process	GO:0043170	macromolecule metabolic process	MSTRG.7018.1
Biological Process	GO:0043170	macromolecule metabolic process	transcript_ACOC_0000104501-mRNA-1
Biological Process	GO:0043170	macromolecule metabolic process	MSTRG.1702.1
Biological Process	GO:0043170	macromolecule metabolic process	transcript_ACOC_0001256001-mRNA-1
Biological Process	GO:0043170	macromolecule metabolic process	transcript_ACOC_0000172101-mRNA-1
Biological Process	GO:0043170	macromolecule metabolic process	transcript_ACOC_0000704501-mRNA-1
Biological Process	GO:0043170	macromolecule metabolic process	transcript_ACOC_0000560801-mRNA-1
Biological Process	GO:0043170	macromolecule metabolic process	MSTRG.5475.1
Biological Process	GO:0043170	macromolecule metabolic process	MSTRG.6393.2
Biological Process	GO:0043170	macromolecule metabolic process	MSTRG.6393.1
Biological Process	GO:0043170	macromolecule metabolic process	transcript_ACOC_0000504501-mRNA-1
Biological Process	GO:0043170	macromolecule metabolic process	MSTRG.1082.1
Biological Process	GO:0043170	macromolecule metabolic process	transcript_ACOC_0000529501-mRNA-1
Biological Process	GO:0043170	macromolecule metabolic process	MSTRG.12540.1
Biological Process	GO:0043170	macromolecule metabolic process	transcript_ACOC_0000102601-mRNA-1
Biological Process	GO:0043170	macromolecule metabolic process	MSTRG.7543.1
Biological Process	GO:0043170	macromolecule metabolic process	transcript_ACOC_0000642101-mRNA-1
Biological Process	GO:0043170	macromolecule metabolic process	transcript_ACOC_0000129501-mRNA-1
Biological Process	GO:0043170	macromolecule metabolic process	transcript_ACOC_0000744201-mRNA-1
Biological Process	GO:0043170	macromolecule metabolic process	MSTRG.10984.3
Biological Process	GO:0043170	macromolecule metabolic process	MSTRG.1082.2
Biological Process	GO:0043170	macromolecule metabolic process	MSTRG.10984.1
Biological Process	GO:0043170	macromolecule metabolic process	MSTRG.5026.1
Biological Process	GO:0043170	macromolecule metabolic process	MSTRG.5026.2
Biological Process	GO:0043170	macromolecule metabolic process	transcript_ACOC_0001075401-mRNA-1
Biological Process	GO:0043170	macromolecule metabolic process	transcript_ACOC_0000971201-mRNA-1
Biological Process	GO:0043170	macromolecule metabolic process	transcript_ACOC_0000234501-mRNA-1
Biological Process	GO:0043170	macromolecule metabolic process	MSTRG.4891.5
Biological Process	GO:0043170	macromolecule metabolic process	MSTRG.11172.1
Biological Process	GO:0043170	macromolecule metabolic process	transcript_ACOC_0000200501-mRNA-1
Biological Process	GO:0043170	macromolecule metabolic process	transcript_ACOC_0000389601-mRNA-1
Biological Process	GO:0043170	macromolecule metabolic process	MSTRG.5488.1
Biological Process	GO:0043170	macromolecule metabolic process	MSTRG.9485.1
Biological Process	GO:0043170	macromolecule metabolic process	MSTRG.9485.2
Biological Process	GO:0043170	macromolecule metabolic process	transcript_ACOC_0000989601-mRNA-1
Biological Process	GO:0043170	macromolecule metabolic process	MSTRG.5684.3
Biological Process	GO:0043170	macromolecule metabolic process	transcript_ACOC_0000942301-mRNA-1
Biological Process	GO:0043170	macromolecule metabolic process	transcript_ACOC_0000613201-mRNA-1
Biological Process	GO:0043170	macromolecule metabolic process	transcript_ACOC_0000105401-mRNA-1
Biological Process	GO:0043170	macromolecule metabolic process	MSTRG.1421.1
Biological Process	GO:0043170	macromolecule metabolic process	transcript_ACOC_0001038501-mRNA-1
Biological Process	GO:0043170	macromolecule metabolic process	transcript_ACOC_0000768301-mRNA-1
Biological Process	GO:0043170	macromolecule metabolic process	transcript_ACOC_0000902601-mRNA-1
Biological Process	GO:0043170	macromolecule metabolic process	transcript_ACOC_0000742301-mRNA-1
Biological Process	GO:0043170	macromolecule metabolic process	MSTRG.10788.1
Biological Process	GO:0043170	macromolecule metabolic process	MSTRG.10788.2
Biological Process	GO:0043170	macromolecule metabolic process	MSTRG.2010.1
Biological Process	GO:0043170	macromolecule metabolic process	MSTRG.9352.1
Biological Process	GO:0043170	macromolecule metabolic process	transcript_ACOC_0001078201-mRNA-1
Biological Process	GO:0043170	macromolecule metabolic process	MSTRG.4486.1
Biological Process	GO:0043170	macromolecule metabolic process	MSTRG.4705.2
Biological Process	GO:0043170	macromolecule metabolic process	MSTRG.1955.1
Biological Process	GO:0043170	macromolecule metabolic process	MSTRG.4705.1
Biological Process	GO:0043170	macromolecule metabolic process	MSTRG.8532.1
Biological Process	GO:0043170	macromolecule metabolic process	transcript_ACOC_0000002401-mRNA-1
Biological Process	GO:0043170	macromolecule metabolic process	transcript_ACOC_0000874201-mRNA-1
Biological Process	GO:0043170	macromolecule metabolic process	transcript_ACOC_0000171201-mRNA-1
Biological Process	GO:0043170	macromolecule metabolic process	MSTRG.7138.1
Biological Process	GO:0043170	macromolecule metabolic process	MSTRG.850.1
Biological Process	GO:0043170	macromolecule metabolic process	MSTRG.3390.1
Biological Process	GO:0043170	macromolecule metabolic process	MSTRG.5222.1
Biological Process	GO:0043170	macromolecule metabolic process	transcript_ACOC_0000198601-mRNA-1
Biological Process	GO:0043170	macromolecule metabolic process	MSTRG.619.1
Biological Process	GO:0043170	macromolecule metabolic process	MSTRG.12255.1
Biological Process	GO:0043170	macromolecule metabolic process	MSTRG.12255.2
Biological Process	GO:0043170	macromolecule metabolic process	MSTRG.12255.3
Biological Process	GO:0043170	macromolecule metabolic process	transcript_ACOC_0000136101-mRNA-1
Biological Process	GO:0043170	macromolecule metabolic process	transcript_ACOC_0000931501-mRNA-1
Biological Process	GO:0043170	macromolecule metabolic process	MSTRG.5756.1
Biological Process	GO:0043170	macromolecule metabolic process	MSTRG.7454.1
Biological Process	GO:0043170	macromolecule metabolic process	MSTRG.5307.1
Biological Process	GO:0043170	macromolecule metabolic process	MSTRG.12714.1
Biological Process	GO:0043170	macromolecule metabolic process	MSTRG.11609.1
Biological Process	GO:0043170	macromolecule metabolic process	transcript_ACOC_0000131001-mRNA-1
Biological Process	GO:0043170	macromolecule metabolic process	transcript_ACOC_0000395301-mRNA-1
Biological Process	GO:0043170	macromolecule metabolic process	transcript_ACOC_0000140501-mRNA-1
Biological Process	GO:0043170	macromolecule metabolic process	transcript_ACOC_0000791001-mRNA-1
Biological Process	GO:0043170	macromolecule metabolic process	MSTRG.8469.1
Biological Process	GO:0043170	macromolecule metabolic process	transcript_ACOC_0001219101-mRNA-1
Biological Process	GO:0043170	macromolecule metabolic process	transcript_ACOC_0000397101-mRNA-1
Biological Process	GO:0043170	macromolecule metabolic process	MSTRG.8216.1
Biological Process	GO:0043170	macromolecule metabolic process	transcript_ACOC_0000734801-mRNA-1
Biological Process	GO:0043170	macromolecule metabolic process	transcript_ACOC_0000546601-mRNA-1
Biological Process	GO:0043170	macromolecule metabolic process	MSTRG.9694.1
Biological Process	GO:0043170	macromolecule metabolic process	transcript_ACOC_0000259001-mRNA-1
Biological Process	GO:0043170	macromolecule metabolic process	transcript_ACOC_0000325301-mRNA-1
Biological Process	GO:0043170	macromolecule metabolic process	transcript_ACOC_0001091501-mRNA-1
Biological Process	GO:0043170	macromolecule metabolic process	transcript_ACOC_0000574001-mRNA-1
Biological Process	GO:0043170	macromolecule metabolic process	MSTRG.6883.1
Biological Process	GO:0043170	macromolecule metabolic process	MSTRG.10583.1
Biological Process	GO:0043170	macromolecule metabolic process	MSTRG.6883.2
Biological Process	GO:0043170	macromolecule metabolic process	MSTRG.1613.1
Biological Process	GO:0043170	macromolecule metabolic process	MSTRG.6883.3
Biological Process	GO:0043170	macromolecule metabolic process	transcript_ACOC_0000219301-mRNA-1
Biological Process	GO:0043170	macromolecule metabolic process	MSTRG.10726.1
Biological Process	GO:0043170	macromolecule metabolic process	transcript_ACOC_0000595801-mRNA-1
Biological Process	GO:0043170	macromolecule metabolic process	MSTRG.223.1
Biological Process	GO:0043170	macromolecule metabolic process	transcript_ACOC_0000489801-mRNA-1
Biological Process	GO:0043170	macromolecule metabolic process	MSTRG.8955.1
Biological Process	GO:0043170	macromolecule metabolic process	MSTRG.5240.3
Biological Process	GO:0043170	macromolecule metabolic process	MSTRG.10859.2
Biological Process	GO:0043170	macromolecule metabolic process	MSTRG.9245.1
Biological Process	GO:0043170	macromolecule metabolic process	MSTRG.1291.1
Biological Process	GO:0043170	macromolecule metabolic process	transcript_ACOC_0000357401-mRNA-1
Biological Process	GO:0043170	macromolecule metabolic process	MSTRG.10219.1
Biological Process	GO:0043170	macromolecule metabolic process	transcript_ACOC_0000848201-mRNA-1
Biological Process	GO:0043170	macromolecule metabolic process	MSTRG.8349.1
Biological Process	GO:0043170	macromolecule metabolic process	transcript_ACOC_0000265701-mRNA-1
Biological Process	GO:0043170	macromolecule metabolic process	MSTRG.8349.3
Biological Process	GO:0043170	macromolecule metabolic process	transcript_ACOC_0000530501-mRNA-1
Biological Process	GO:0043170	macromolecule metabolic process	transcript_ACOC_0000201401-mRNA-1
Biological Process	GO:0043170	macromolecule metabolic process	transcript_ACOC_0000740001-mRNA-1
Biological Process	GO:0043170	macromolecule metabolic process	MSTRG.12122.1
Biological Process	GO:0043170	macromolecule metabolic process	transcript_ACOC_0000007501-mRNA-1
Biological Process	GO:0043170	macromolecule metabolic process	MSTRG.6380.1
Biological Process	GO:0043170	macromolecule metabolic process	MSTRG.5636.1
Biological Process	GO:0043170	macromolecule metabolic process	MSTRG.10415.1
Biological Process	GO:0043170	macromolecule metabolic process	MSTRG.5164.1
Biological Process	GO:0043170	macromolecule metabolic process	MSTRG.5164.2
Biological Process	GO:0043170	macromolecule metabolic process	MSTRG.9191.1
Biological Process	GO:0043170	macromolecule metabolic process	transcript_ACOC_0000712001-mRNA-1
Biological Process	GO:0043170	macromolecule metabolic process	transcript_ACOC_0001092001-mRNA-1
Biological Process	GO:0043170	macromolecule metabolic process	MSTRG.6630.1
Biological Process	GO:0043170	macromolecule metabolic process	transcript_ACOC_0000173001-mRNA-1
Biological Process	GO:0043170	macromolecule metabolic process	MSTRG.12701.1
Biological Process	GO:0043170	macromolecule metabolic process	transcript_ACOC_0000432701-mRNA-1
Biological Process	GO:0043170	macromolecule metabolic process	transcript_ACOC_0000401901-mRNA-1
Biological Process	GO:0043170	macromolecule metabolic process	MSTRG.10979.2
Biological Process	GO:0043170	macromolecule metabolic process	MSTRG.7957.1
Biological Process	GO:0043170	macromolecule metabolic process	transcript_ACOC_0000322001-mRNA-1
Biological Process	GO:0043170	macromolecule metabolic process	transcript_ACOC_0000472901-mRNA-1
Biological Process	GO:0043170	macromolecule metabolic process	MSTRG.2289.1
Biological Process	GO:0043170	macromolecule metabolic process	transcript_ACOC_0001210701-mRNA-1
Biological Process	GO:0043170	macromolecule metabolic process	MSTRG.3581.1
Biological Process	GO:0043170	macromolecule metabolic process	MSTRG.4348.1
Biological Process	GO:0043170	macromolecule metabolic process	transcript_ACOC_0000975901-mRNA-1
Biological Process	GO:0043170	macromolecule metabolic process	transcript_ACOC_0000364001-mRNA-1
Biological Process	GO:0043170	macromolecule metabolic process	transcript_ACOC_0001128301-mRNA-1
Biological Process	GO:0043170	macromolecule metabolic process	transcript_ACOC_0001258301-mRNA-1
Biological Process	GO:0043170	macromolecule metabolic process	transcript_ACOC_0000042601-mRNA-1
Biological Process	GO:0043170	macromolecule metabolic process	MSTRG.5712.1
Biological Process	GO:0043170	macromolecule metabolic process	MSTRG.2574.2
Biological Process	GO:0043170	macromolecule metabolic process	MSTRG.7561.1
Biological Process	GO:0043170	macromolecule metabolic process	MSTRG.4980.1
Biological Process	GO:0043170	macromolecule metabolic process	transcript_ACOC_0000355101-mRNA-1
Biological Process	GO:0043170	macromolecule metabolic process	transcript_ACOC_0001135401-mRNA-1
Biological Process	GO:0043170	macromolecule metabolic process	MSTRG.7926.1
Biological Process	GO:0043170	macromolecule metabolic process	MSTRG.7245.1
Biological Process	GO:0043170	macromolecule metabolic process	MSTRG.9530.1
Biological Process	GO:0043170	macromolecule metabolic process	transcript_ACOC_0001126501-mRNA-1
Biological Process	GO:0043170	macromolecule metabolic process	MSTRG.4927.3
Biological Process	GO:0043170	macromolecule metabolic process	MSTRG.12242.1
Biological Process	GO:0043170	macromolecule metabolic process	MSTRG.4927.4
Biological Process	GO:0043170	macromolecule metabolic process	MSTRG.4927.1
Biological Process	GO:0043170	macromolecule metabolic process	transcript_ACOC_0001014901-mRNA-1
Biological Process	GO:0043170	macromolecule metabolic process	transcript_ACOC_0000972601-mRNA-1
Biological Process	GO:0043170	macromolecule metabolic process	transcript_ACOC_0000290301-mRNA-1
Biological Process	GO:0043170	macromolecule metabolic process	MSTRG.9112.1
Biological Process	GO:0043170	macromolecule metabolic process	transcript_ACOC_0000250601-mRNA-1
Biological Process	GO:0043170	macromolecule metabolic process	MSTRG.6238.1
Biological Process	GO:0043170	macromolecule metabolic process	transcript_ACOC_0000506901-mRNA-1
Biological Process	GO:0043170	macromolecule metabolic process	MSTRG.1447.1
Biological Process	GO:0043170	macromolecule metabolic process	MSTRG.6656.1
Biological Process	GO:0043170	macromolecule metabolic process	MSTRG.1973.3
Biological Process	GO:0043170	macromolecule metabolic process	MSTRG.6656.4
Biological Process	GO:0043170	macromolecule metabolic process	MSTRG.685.1
Biological Process	GO:0043170	macromolecule metabolic process	MSTRG.6656.3
Biological Process	GO:0043170	macromolecule metabolic process	MSTRG.6656.2
Biological Process	GO:0043170	macromolecule metabolic process	transcript_ACOC_0000828301-mRNA-1
Biological Process	GO:0043170	macromolecule metabolic process	MSTRG.2125.1
Biological Process	GO:0043170	macromolecule metabolic process	MSTRG.1973.1
Biological Process	GO:0043170	macromolecule metabolic process	MSTRG.5649.1
Biological Process	GO:0043170	macromolecule metabolic process	transcript_ACOC_0001138201-mRNA-1
Biological Process	GO:0043170	macromolecule metabolic process	MSTRG.8229.1
Biological Process	GO:0043170	macromolecule metabolic process	MSTRG.8099.2
Biological Process	GO:0043170	macromolecule metabolic process	transcript_ACOC_0000781601-mRNA-1
Biological Process	GO:0043170	macromolecule metabolic process	MSTRG.7837.1
Biological Process	GO:0043170	macromolecule metabolic process	MSTRG.4335.1
Biological Process	GO:0043170	macromolecule metabolic process	MSTRG.10428.1
Biological Process	GO:0043170	macromolecule metabolic process	MSTRG.11017.1
Biological Process	GO:0043170	macromolecule metabolic process	transcript_ACOC_0000523401-mRNA-1
Biological Process	GO:0043170	macromolecule metabolic process	MSTRG.10428.2
Biological Process	GO:0043170	macromolecule metabolic process	transcript_ACOC_0000247301-mRNA-1
Biological Process	GO:0043170	macromolecule metabolic process	MSTRG.4797.1
Biological Process	GO:0043170	macromolecule metabolic process	MSTRG.6118.3
Biological Process	GO:0043170	macromolecule metabolic process	MSTRG.9663.1
Biological Process	GO:0043170	macromolecule metabolic process	MSTRG.6118.1
Biological Process	GO:0043170	macromolecule metabolic process	MSTRG.5529.1
Biological Process	GO:0043170	macromolecule metabolic process	MSTRG.9201.2
Biological Process	GO:0043170	macromolecule metabolic process	transcript_ACOC_0001275901-mRNA-1
Biological Process	GO:0043170	macromolecule metabolic process	MSTRG.3648.2
Biological Process	GO:0043170	macromolecule metabolic process	MSTRG.10481.1
Biological Process	GO:0043170	macromolecule metabolic process	transcript_ACOC_0000636901-mRNA-1
Biological Process	GO:0043170	macromolecule metabolic process	MSTRG.85.1
Biological Process	GO:0043170	macromolecule metabolic process	MSTRG.6171.3
Biological Process	GO:0043170	macromolecule metabolic process	MSTRG.5801.1
Biological Process	GO:0043170	macromolecule metabolic process	MSTRG.1777.1
Biological Process	GO:0043170	macromolecule metabolic process	transcript_ACOC_0000133901-mRNA-1
Biological Process	GO:0043170	macromolecule metabolic process	MSTRG.6171.1
Biological Process	GO:0043170	macromolecule metabolic process	transcript_ACOC_0000058101-mRNA-1
Biological Process	GO:0043170	macromolecule metabolic process	transcript_ACOC_0000676601-mRNA-1
Biological Process	GO:0043170	macromolecule metabolic process	MSTRG.3296.2
Biological Process	GO:0043170	macromolecule metabolic process	transcript_ACOC_0000721501-mRNA-1
Biological Process	GO:0043170	macromolecule metabolic process	transcript_ACOC_0001175701-mRNA-1
Biological Process	GO:0043170	macromolecule metabolic process	MSTRG.4993.1
Biological Process	GO:0043170	macromolecule metabolic process	transcript_ACOC_0000897901-mRNA-1
Biological Process	GO:0043170	macromolecule metabolic process	transcript_ACOC_0000818401-mRNA-1
Biological Process	GO:0043170	macromolecule metabolic process	transcript_ACOC_0001144901-mRNA-1
Biological Process	GO:0043170	macromolecule metabolic process	MSTRG.5120.1
Biological Process	GO:0043170	macromolecule metabolic process	MSTRG.5725.2
Biological Process	GO:0043170	macromolecule metabolic process	MSTRG.10285.1
Biological Process	GO:0043170	macromolecule metabolic process	MSTRG.7694.1
Biological Process	GO:0043170	macromolecule metabolic process	transcript_ACOC_0000315401-mRNA-1
Biological Process	GO:0043170	macromolecule metabolic process	transcript_ACOC_0000644501-mRNA-1
Biological Process	GO:0043170	macromolecule metabolic process	MSTRG.476.1
Biological Process	GO:0043170	macromolecule metabolic process	MSTRG.7232.1
Biological Process	GO:0043170	macromolecule metabolic process	MSTRG.1380.1
Biological Process	GO:0043170	macromolecule metabolic process	MSTRG.6776.1
Biological Process	GO:0043170	macromolecule metabolic process	transcript_ACOC_0001022501-mRNA-1
Biological Process	GO:0043170	macromolecule metabolic process	transcript_ACOC_0000900201-mRNA-1
Biological Process	GO:0043170	macromolecule metabolic process	transcript_ACOC_0000811301-mRNA-1
Biological Process	GO:0043170	macromolecule metabolic process	transcript_ACOC_0001228001-mRNA-1
Biological Process	GO:0043170	macromolecule metabolic process	MSTRG.7627.5
Biological Process	GO:0043170	macromolecule metabolic process	transcript_ACOC_0000198001-mRNA-1
Biological Process	GO:0043170	macromolecule metabolic process	MSTRG.7627.3
Biological Process	GO:0043170	macromolecule metabolic process	transcript_ACOC_0001237501-mRNA-1
Biological Process	GO:0043170	macromolecule metabolic process	MSTRG.7627.1
Biological Process	GO:0043170	macromolecule metabolic process	MSTRG.5217.1
Biological Process	GO:0043170	macromolecule metabolic process	MSTRG.7627.2
Biological Process	GO:0043170	macromolecule metabolic process	transcript_ACOC_0000546501-mRNA-1
Biological Process	GO:0043170	macromolecule metabolic process	transcript_ACOC_0000013801-mRNA-1
Biological Process	GO:0043170	macromolecule metabolic process	MSTRG.1064.1
Biological Process	GO:0043170	macromolecule metabolic process	MSTRG.5270.2
Biological Process	GO:0043170	macromolecule metabolic process	transcript_ACOC_0000687901-mRNA-1
Biological Process	GO:0043170	macromolecule metabolic process	MSTRG.6345.1
Biological Process	GO:0043170	macromolecule metabolic process	transcript_ACOC_0000339501-mRNA-1
Biological Process	GO:0043170	macromolecule metabolic process	MSTRG.6608.1
Biological Process	GO:0043170	macromolecule metabolic process	MSTRG.6608.2
Biological Process	GO:0043170	macromolecule metabolic process	transcript_ACOC_0000388201-mRNA-1
Biological Process	GO:0043170	macromolecule metabolic process	MSTRG.386.1
Biological Process	GO:0043170	macromolecule metabolic process	transcript_ACOC_0000029701-mRNA-1
Biological Process	GO:0043170	macromolecule metabolic process	MSTRG.6598.1
Biological Process	GO:0043170	macromolecule metabolic process	MSTRG.7168.1
Biological Process	GO:0043170	macromolecule metabolic process	MSTRG.2139.1
Biological Process	GO:0043170	macromolecule metabolic process	MSTRG.7680.1
Biological Process	GO:0043170	macromolecule metabolic process	transcript_ACOC_0000797701-mRNA-1
Biological Process	GO:0043170	macromolecule metabolic process	MSTRG.5666.1
Biological Process	GO:0043170	macromolecule metabolic process	MSTRG.5390.1
Biological Process	GO:0043170	macromolecule metabolic process	MSTRG.12998.1
Biological Process	GO:0043170	macromolecule metabolic process	MSTRG.9085.1
Biological Process	GO:0043170	macromolecule metabolic process	transcript_ACOC_0000988201-mRNA-1
Biological Process	GO:0043170	macromolecule metabolic process	MSTRG.9215.1
Biological Process	GO:0043170	macromolecule metabolic process	transcript_ACOC_0000334201-mRNA-1
Biological Process	GO:0043170	macromolecule metabolic process	transcript_ACOC_0000395201-mRNA-1
Biological Process	GO:0043170	macromolecule metabolic process	MSTRG.6149.1
Biological Process	GO:0043170	macromolecule metabolic process	transcript_ACOC_0000275601-mRNA-1
Biological Process	GO:0043170	macromolecule metabolic process	MSTRG.1511.1
Biological Process	GO:0043170	macromolecule metabolic process	transcript_ACOC_0000309601-mRNA-1
Biological Process	GO:0043170	macromolecule metabolic process	MSTRG.11496.1
Biological Process	GO:0043170	macromolecule metabolic process	transcript_ACOC_0000128001-mRNA-1
Biological Process	GO:0043170	macromolecule metabolic process	MSTRG.11496.2
Biological Process	GO:0043170	macromolecule metabolic process	MSTRG.12020.2
Biological Process	GO:0043170	macromolecule metabolic process	transcript_ACOC_0000509601-mRNA-1
Biological Process	GO:0043170	macromolecule metabolic process	transcript_ACOC_0000619401-mRNA-1
Biological Process	GO:0043170	macromolecule metabolic process	transcript_ACOC_0000296001-mRNA-1
Biological Process	GO:0043170	macromolecule metabolic process	MSTRG.12020.1
Biological Process	GO:0043170	macromolecule metabolic process	MSTRG.4371.1
Biological Process	GO:0043170	macromolecule metabolic process	transcript_ACOC_0000989501-mRNA-1
Biological Process	GO:0043170	macromolecule metabolic process	MSTRG.11848.2
Biological Process	GO:0043170	macromolecule metabolic process	MSTRG.11848.1
Biological Process	GO:0043170	macromolecule metabolic process	MSTRG.5799.1
Biological Process	GO:0043170	macromolecule metabolic process	transcript_ACOC_0000084101-mRNA-1
Biological Process	GO:0043170	macromolecule metabolic process	MSTRG.978.1
Biological Process	GO:0043170	macromolecule metabolic process	transcript_ACOC_0000531401-mRNA-1
Biological Process	GO:0043170	macromolecule metabolic process	transcript_ACOC_0000345201-mRNA-1
Biological Process	GO:0043170	macromolecule metabolic process	MSTRG.6937.1
Biological Process	GO:0043170	macromolecule metabolic process	MSTRG.6937.2
Biological Process	GO:0043170	macromolecule metabolic process	MSTRG.6728.1
Biological Process	GO:0043170	macromolecule metabolic process	MSTRG.6937.3
Biological Process	GO:0043170	macromolecule metabolic process	transcript_ACOC_0001022901-mRNA-1
Biological Process	GO:0043170	macromolecule metabolic process	transcript_ACOC_0000728501-mRNA-1
Biological Process	GO:0043170	macromolecule metabolic process	transcript_ACOC_0000928501-mRNA-1
Biological Process	GO:0043170	macromolecule metabolic process	MSTRG.4843.1
Biological Process	GO:0043170	macromolecule metabolic process	transcript_ACOC_0000786701-mRNA-1
Biological Process	GO:0043170	macromolecule metabolic process	MSTRG.7288.1
Biological Process	GO:0043170	macromolecule metabolic process	MSTRG.10313.1
Biological Process	GO:0043170	macromolecule metabolic process	MSTRG.7930.1
Biological Process	GO:0043170	macromolecule metabolic process	transcript_ACOC_0000192401-mRNA-1
Biological Process	GO:0043170	macromolecule metabolic process	MSTRG.9468.1
Biological Process	GO:0043170	macromolecule metabolic process	transcript_ACOC_0000324401-mRNA-1
Biological Process	GO:0043170	macromolecule metabolic process	transcript_ACOC_0000545201-mRNA-1
Biological Process	GO:0043170	macromolecule metabolic process	transcript_ACOC_0001144501-mRNA-1
Biological Process	GO:0043170	macromolecule metabolic process	MSTRG.7930.2
Biological Process	GO:0043170	macromolecule metabolic process	MSTRG.6358.1
Biological Process	GO:0043170	macromolecule metabolic process	MSTRG.10094.1
Biological Process	GO:0043170	macromolecule metabolic process	transcript_ACOC_0000949301-mRNA-1
Biological Process	GO:0043170	macromolecule metabolic process	MSTRG.7484.1
Biological Process	GO:0043170	macromolecule metabolic process	MSTRG.399.1
Biological Process	GO:0043170	macromolecule metabolic process	MSTRG.5426.1
Biological Process	GO:0043170	macromolecule metabolic process	MSTRG.10446.2
Biological Process	GO:0043170	macromolecule metabolic process	transcript_ACOC_0000516201-mRNA-1
Biological Process	GO:0043170	macromolecule metabolic process	MSTRG.11728.2
Biological Process	GO:0043170	macromolecule metabolic process	MSTRG.240.1
Biological Process	GO:0043170	macromolecule metabolic process	MSTRG.7275.1
Biological Process	GO:0043170	macromolecule metabolic process	MSTRG.240.2
Biological Process	GO:0043170	macromolecule metabolic process	transcript_ACOC_0001051901-mRNA-1
Biological Process	GO:0043170	macromolecule metabolic process	transcript_ACOC_0001061701-mRNA-1
Biological Process	GO:0043170	macromolecule metabolic process	MSTRG.4295.1
Biological Process	GO:0043170	macromolecule metabolic process	MSTRG.8527.2
Biological Process	GO:0043170	macromolecule metabolic process	transcript_ACOC_0000757501-mRNA-1
Biological Process	GO:0043170	macromolecule metabolic process	MSTRG.8527.1
Biological Process	GO:0043170	macromolecule metabolic process	transcript_ACOC_0000983901-mRNA-1
Biological Process	GO:0043170	macromolecule metabolic process	MSTRG.10597.1
Biological Process	GO:0043170	macromolecule metabolic process	transcript_ACOC_0001184101-mRNA-1
Biological Process	GO:0043170	macromolecule metabolic process	transcript_ACOC_0000524801-mRNA-1
Biological Process	GO:0043170	macromolecule metabolic process	transcript_ACOC_0000900301-mRNA-1
Biological Process	GO:0043170	macromolecule metabolic process	MSTRG.12140.1
Biological Process	GO:0043170	macromolecule metabolic process	MSTRG.6136.2
Biological Process	GO:0043170	macromolecule metabolic process	MSTRG.4754.1
Biological Process	GO:0043170	macromolecule metabolic process	MSTRG.12140.3
Biological Process	GO:0043170	macromolecule metabolic process	transcript_ACOC_0000974401-mRNA-1
Biological Process	GO:0043170	macromolecule metabolic process	MSTRG.7471.1
Biological Process	GO:0043170	macromolecule metabolic process	MSTRG.177.2
Biological Process	GO:0043170	macromolecule metabolic process	transcript_ACOC_0000515301-mRNA-1
Biological Process	GO:0043170	macromolecule metabolic process	MSTRG.177.1
Biological Process	GO:0043170	macromolecule metabolic process	MSTRG.8580.1
Biological Process	GO:0043170	macromolecule metabolic process	MSTRG.10446.1
Biological Process	GO:0043170	macromolecule metabolic process	MSTRG.5679.1
Biological Process	GO:0043170	macromolecule metabolic process	transcript_ACOC_0001061801-mRNA-1
Biological Process	GO:0043170	macromolecule metabolic process	MSTRG.12077.1
Biological Process	GO:0043170	macromolecule metabolic process	transcript_ACOC_0001013401-mRNA-1
Biological Process	GO:0043170	macromolecule metabolic process	transcript_ACOC_0000767401-mRNA-1
Biological Process	GO:0043170	macromolecule metabolic process	MSTRG.7867.1
Biological Process	GO:0043170	macromolecule metabolic process	transcript_ACOC_0000402801-mRNA-1
Biological Process	GO:0043170	macromolecule metabolic process	transcript_ACOC_0000918701-mRNA-1
Biological Process	GO:0043170	macromolecule metabolic process	MSTRG.6003.1
Biological Process	GO:0043170	macromolecule metabolic process	transcript_ACOC_0000776301-mRNA-1
Biological Process	GO:0043170	macromolecule metabolic process	MSTRG.4634.1
Biological Process	GO:0043170	macromolecule metabolic process	transcript_ACOC_0000496401-mRNA-1
Biological Process	GO:0043170	macromolecule metabolic process	transcript_ACOC_0000127601-mRNA-1
Biological Process	GO:0043170	macromolecule metabolic process	transcript_ACOC_0000113401-mRNA-1
Biological Process	GO:0043170	macromolecule metabolic process	MSTRG.12077.2
Biological Process	GO:0043170	macromolecule metabolic process	transcript_ACOC_0000955601-mRNA-1
Biological Process	GO:0043170	macromolecule metabolic process	transcript_ACOC_0001331801-mRNA-1
Biological Process	GO:0043170	macromolecule metabolic process	MSTRG.7591.1
Biological Process	GO:0043170	macromolecule metabolic process	MSTRG.8764.1
Biological Process	GO:0043170	macromolecule metabolic process	transcript_ACOC_0000363201-mRNA-1
Biological Process	GO:0043170	macromolecule metabolic process	transcript_ACOC_0000767301-mRNA-1
Biological Process	GO:0043170	macromolecule metabolic process	MSTRG.12536.3
Biological Process	GO:0043170	macromolecule metabolic process	transcript_ACOC_0001187901-mRNA-1
Biological Process	GO:0043170	macromolecule metabolic process	transcript_ACOC_0001274401-mRNA-1
Biological Process	GO:0043170	macromolecule metabolic process	MSTRG.12536.2
Biological Process	GO:0043170	macromolecule metabolic process	MSTRG.9500.2
Biological Process	GO:0043170	macromolecule metabolic process	MSTRG.9500.1
Biological Process	GO:0043170	macromolecule metabolic process	transcript_ACOC_0000309201-mRNA-1
Biological Process	GO:0043170	macromolecule metabolic process	transcript_ACOC_0000955001-mRNA-1
Biological Process	GO:0043170	macromolecule metabolic process	transcript_ACOC_0000094501-mRNA-1
Biological Process	GO:0043170	macromolecule metabolic process	MSTRG.11924.1
Biological Process	GO:0043170	macromolecule metabolic process	MSTRG.6016.1
Biological Process	GO:0043170	macromolecule metabolic process	transcript_ACOC_0000103501-mRNA-1
Biological Process	GO:0043170	macromolecule metabolic process	MSTRG.9019.1
Biological Process	GO:0043170	macromolecule metabolic process	transcript_ACOC_0001134601-mRNA-1
Biological Process	GO:0043170	macromolecule metabolic process	transcript_ACOC_0000605601-mRNA-1
Biological Process	GO:0043170	macromolecule metabolic process	MSTRG.7395.1
Biological Process	GO:0043170	macromolecule metabolic process	transcript_ACOC_0000761701-mRNA-1
Biological Process	GO:0043170	macromolecule metabolic process	transcript_ACOC_0001006401-mRNA-1
Biological Process	GO:0043170	macromolecule metabolic process	MSTRG.5755.1
Biological Process	GO:0043170	macromolecule metabolic process	MSTRG.5087.1
Biological Process	GO:0043170	macromolecule metabolic process	MSTRG.8460.1
Biological Process	GO:0043170	macromolecule metabolic process	transcript_ACOC_0000354701-mRNA-1
Biological Process	GO:0043170	macromolecule metabolic process	transcript_ACOC_0000651001-mRNA-1
Biological Process	GO:0043170	macromolecule metabolic process	transcript_ACOC_0000650101-mRNA-1
Biological Process	GO:0043170	macromolecule metabolic process	transcript_ACOC_0000317801-mRNA-1
Biological Process	GO:0043170	macromolecule metabolic process	MSTRG.2411.1
Biological Process	GO:0043170	macromolecule metabolic process	transcript_ACOC_0000444001-mRNA-1
Biological Process	GO:0043170	macromolecule metabolic process	MSTRG.4282.1
Biological Process	GO:0043170	macromolecule metabolic process	MSTRG.9753.1
Biological Process	GO:0043170	macromolecule metabolic process	transcript_ACOC_0001176501-mRNA-1
Biological Process	GO:0043170	macromolecule metabolic process	transcript_ACOC_0000407101-mRNA-1
Biological Process	GO:0043170	macromolecule metabolic process	transcript_ACOC_0000958801-mRNA-1
Biological Process	GO:0043170	macromolecule metabolic process	MSTRG.5283.1
Biological Process	GO:0043170	macromolecule metabolic process	MSTRG.8264.1
Biological Process	GO:0043170	macromolecule metabolic process	transcript_ACOC_0000500701-mRNA-1
Biological Process	GO:0043170	macromolecule metabolic process	MSTRG.12197.2
Biological Process	GO:0043170	macromolecule metabolic process	MSTRG.7747.1
Biological Process	GO:0043170	macromolecule metabolic process	transcript_ACOC_0000865301-mRNA-1
Biological Process	GO:0043170	macromolecule metabolic process	MSTRG.1482.1
Biological Process	GO:0043170	macromolecule metabolic process	MSTRG.120.1
Biological Process	GO:0043170	macromolecule metabolic process	MSTRG.7747.2
Biological Process	GO:0043170	macromolecule metabolic process	transcript_ACOC_0001052201-mRNA-1
Biological Process	GO:0043170	macromolecule metabolic process	transcript_ACOC_0001304701-mRNA-1
Biological Process	GO:0043170	macromolecule metabolic process	transcript_ACOC_0000829701-mRNA-1
Biological Process	GO:0043170	macromolecule metabolic process	transcript_ACOC_0001268701-mRNA-1
Biological Process	GO:0043170	macromolecule metabolic process	transcript_ACOC_0000069501-mRNA-1
Biological Process	GO:0043170	macromolecule metabolic process	MSTRG.284.1
Biological Process	GO:0043170	macromolecule metabolic process	transcript_ACOC_0000153601-mRNA-1
Biological Process	GO:0043170	macromolecule metabolic process	MSTRG.7525.1
Biological Process	GO:0043170	macromolecule metabolic process	transcript_ACOC_0001074001-mRNA-1
Biological Process	GO:0043170	macromolecule metabolic process	MSTRG.5115.1
Biological Process	GO:0043170	macromolecule metabolic process	MSTRG.2500.1
Biological Process	GO:0043170	macromolecule metabolic process	MSTRG.7209.1
Biological Process	GO:0043170	macromolecule metabolic process	MSTRG.8751.2
Biological Process	GO:0043170	macromolecule metabolic process	transcript_ACOC_0001162901-mRNA-1
Biological Process	GO:0043170	macromolecule metabolic process	MSTRG.8751.3
Biological Process	GO:0043170	macromolecule metabolic process	MSTRG.2294.2
Biological Process	GO:0043170	macromolecule metabolic process	MSTRG.2041.1
Biological Process	GO:0043170	macromolecule metabolic process	MSTRG.7262.3
Biological Process	GO:0043170	macromolecule metabolic process	MSTRG.7262.1
Biological Process	GO:0043170	macromolecule metabolic process	MSTRG.480.2
Biological Process	GO:0043170	macromolecule metabolic process	transcript_ACOC_0000855401-mRNA-1
Biological Process	GO:0043170	macromolecule metabolic process	MSTRG.9513.1
Biological Process	GO:0043170	macromolecule metabolic process	transcript_ACOC_0000013201-mRNA-1
Biological Process	GO:0043170	macromolecule metabolic process	MSTRG.23.1
Biological Process	GO:0043170	macromolecule metabolic process	transcript_ACOC_0000666201-mRNA-1
Biological Process	GO:0043170	macromolecule metabolic process	MSTRG.6506.1
Biological Process	GO:0043170	macromolecule metabolic process	MSTRG.9962.1
Biological Process	GO:0043170	macromolecule metabolic process	MSTRG.6506.2
Biological Process	GO:0043170	macromolecule metabolic process	transcript_ACOC_0000783501-mRNA-1
Biological Process	GO:0043170	macromolecule metabolic process	transcript_ACOC_0001159001-mRNA-1
Biological Process	GO:0043170	macromolecule metabolic process	transcript_ACOC_0001039401-mRNA-1
Biological Process	GO:0043170	macromolecule metabolic process	transcript_ACOC_0000675701-mRNA-1
Biological Process	GO:0043170	macromolecule metabolic process	MSTRG.2490.1
Biological Process	GO:0043170	macromolecule metabolic process	transcript_ACOC_0001032801-mRNA-1
Biological Process	GO:0043170	macromolecule metabolic process	transcript_ACOC_0000198101-mRNA-1
Biological Process	GO:0043170	macromolecule metabolic process	MSTRG.547.1
Biological Process	GO:0043170	macromolecule metabolic process	transcript_ACOC_0000358901-mRNA-1
Biological Process	GO:0043170	macromolecule metabolic process	MSTRG.1599.1
Biological Process	GO:0043170	macromolecule metabolic process	MSTRG.2490.3
Biological Process	GO:0043170	macromolecule metabolic process	transcript_ACOC_0000135801-mRNA-1
Biological Process	GO:0043170	macromolecule metabolic process	MSTRG.11746.1
Biological Process	GO:0043170	macromolecule metabolic process	transcript_ACOC_0001253601-mRNA-1
Biological Process	GO:0043170	macromolecule metabolic process	MSTRG.11034.1
Biological Process	GO:0043170	macromolecule metabolic process	transcript_ACOC_0000421901-mRNA-1
Biological Process	GO:0043170	macromolecule metabolic process	MSTRG.7961.1
Biological Process	GO:0043170	macromolecule metabolic process	MSTRG.1662.3
Biological Process	GO:0043170	macromolecule metabolic process	MSTRG.9646.1
Biological Process	GO:0043170	macromolecule metabolic process	transcript_ACOC_0001125101-mRNA-1
Biological Process	GO:0043170	macromolecule metabolic process	MSTRG.9646.2
Biological Process	GO:0043170	macromolecule metabolic process	transcript_ACOC_0001084501-mRNA-1
Biological Process	GO:0043170	macromolecule metabolic process	MSTRG.1662.1
Biological Process	GO:0043170	macromolecule metabolic process	transcript_ACOC_0000125301-mRNA-1
Biological Process	GO:0043170	macromolecule metabolic process	MSTRG.9842.1
Biological Process	GO:0043170	macromolecule metabolic process	MSTRG.610.3
Biological Process	GO:0043170	macromolecule metabolic process	MSTRG.3203.1
Biological Process	GO:0043170	macromolecule metabolic process	MSTRG.7854.1
Biological Process	GO:0043170	macromolecule metabolic process	MSTRG.2633.4
Biological Process	GO:0043170	macromolecule metabolic process	transcript_ACOC_0000015501-mRNA-1
Biological Process	GO:0043170	macromolecule metabolic process	MSTRG.307.1
Biological Process	GO:0043170	macromolecule metabolic process	MSTRG.4616.2
Biological Process	GO:0043170	macromolecule metabolic process	MSTRG.4616.1
Biological Process	GO:0043170	macromolecule metabolic process	MSTRG.8353.1
Biological Process	GO:0043170	macromolecule metabolic process	MSTRG.3589.1
Biological Process	GO:0043170	macromolecule metabolic process	MSTRG.1991.1
Biological Process	GO:0043170	macromolecule metabolic process	MSTRG.9294.1
Biological Process	GO:0043170	macromolecule metabolic process	MSTRG.7382.1
Biological Process	GO:0043170	macromolecule metabolic process	transcript_ACOC_0000051101-mRNA-1
Biological Process	GO:0043170	macromolecule metabolic process	transcript_ACOC_0000000101-mRNA-1
Biological Process	GO:0043170	macromolecule metabolic process	transcript_ACOC_0000852401-mRNA-1
Biological Process	GO:0043170	macromolecule metabolic process	transcript_ACOC_0001085801-mRNA-1
Biological Process	GO:0043170	macromolecule metabolic process	transcript_ACOC_0000258701-mRNA-1
Biological Process	GO:0043170	macromolecule metabolic process	MSTRG.4616.4
Biological Process	GO:0043170	macromolecule metabolic process	MSTRG.8818.1
Biological Process	GO:0043170	macromolecule metabolic process	MSTRG.164.1
Biological Process	GO:0043170	macromolecule metabolic process	transcript_ACOC_0000698401-mRNA-1
Biological Process	GO:0043170	macromolecule metabolic process	MSTRG.11167.1
Biological Process	GO:0043170	macromolecule metabolic process	MSTRG.5092.1
Biological Process	GO:0043170	macromolecule metabolic process	transcript_ACOC_0000225501-mRNA-1
Biological Process	GO:0043170	macromolecule metabolic process	MSTRG.7329.1
Biological Process	GO:0043170	macromolecule metabolic process	transcript_ACOC_0000091301-mRNA-1
Biological Process	GO:0043170	macromolecule metabolic process	transcript_ACOC_0000987801-mRNA-1
Biological Process	GO:0043170	macromolecule metabolic process	transcript_ACOC_0000493101-mRNA-1
Biological Process	GO:0043170	macromolecule metabolic process	transcript_ACOC_0000701201-mRNA-1
Biological Process	GO:0043170	macromolecule metabolic process	transcript_ACOC_0000298901-mRNA-1
Biological Process	GO:0043170	macromolecule metabolic process	transcript_ACOC_0000493701-mRNA-1
Biological Process	GO:0043170	macromolecule metabolic process	MSTRG.9722.1
Biological Process	GO:0043170	macromolecule metabolic process	MSTRG.12291.1
Biological Process	GO:0043170	macromolecule metabolic process	MSTRG.7316.1
Biological Process	GO:0043170	macromolecule metabolic process	MSTRG.6287.1
Biological Process	GO:0043170	macromolecule metabolic process	MSTRG.7569.1
Biological Process	GO:0043170	macromolecule metabolic process	transcript_ACOC_0000899801-mRNA-1
Biological Process	GO:0043170	macromolecule metabolic process	MSTRG.10344.1
Biological Process	GO:0043170	macromolecule metabolic process	transcript_ACOC_0000683301-mRNA-1
Biological Process	GO:0043170	macromolecule metabolic process	MSTRG.2962.1
[truncated: 108,632 more rows]
