# Supplementary material for: Identification of Novel Genes and Proteoforms in Angiostrongylus costaricensis through a Proteogenomic Approach
Source: Pathogens. 2022 Oct 31;11(11):1273. doi: 10.3390/pathogens11111273 (PMC9694666; doi:10.3390/pathogens11111273)
Supplement: Supplementary file 1 [file pathogens-11-01273-s001.zip › Supplemental_Data_S8.xlsx]

## Sheet: omicsbox_export
Supplemental Data S8. Blast2GO functional annotation
Sequence Name	Sequence Description	Sequence Data	Sequence Length	Blast Hits Count	Blast Min E-Value	Blast Similarity Mean	Mapping Gene Name	Mapping GO ID	Mapping GO Term	Annotation GO Count	Annotation GO ID	Annotation GO Term	Enzyme Code	Enzyme Name	InterPro Accession	InterPro Type	InterPro Name	InterPro Signatures	InterPro GO Term
transcript_ACOC_0000000101-mRNA-1	ATP-dependent Clp protease adaptor protein ClpS	MTGELWSAATPSSPHDVVRQPTRATQLIDLPYEFSEVIHLASAFKCPSIPLDENAANVPTMCLVCGQILCSQSYCCQKQVGKESTGACRYHMMHCSGPMGVFLRIRDCAVVLMTTRNRGCFRAAPYVDEFGEADQGFRRGNPLHLNEELYHKLRQLWLQQGIAEEVVNQYEIDHRNMQYDWGHF	184	20	1.8e-138	0.8774	Cni-ubr-1;ANCCAN_16041;ubr-1;ubr-1;WR25_18490;WR25_21476;ubr-1;HPLM_LOCUS14600;WR25_21476;ubr-1;CRE_23977;WR25_18490;NBR_LOCUS3200;OESDEN_15549;ANCCAN_16041;CAEBREN_21443;HPLM_LOCUS14600;NECAME_06616;FL82_12722;ubr-1;FL81_13024;FL83_08186;FL81_13024;NECAME_06616;FL82_12722;Acey_s0353.g3290;NECAME_06616;FL81_13024;FL83_08186;Acey_s0353.g3290;NBR_LOCUS3200;OESDEN_15549;GCK72_002186;CAEBREN_21443;FL…	GO:0005737-IBA;GO:0046872-IEA;GO:0000151-IBA;GO:0016020-IEA;GO:0006508-IEA;GO:0071596-IBA;GO:0071596-IEA;GO:0016021-IEA;GO:2000212-IMP;GO:2000212-IEA;GO:0016740-IEA;GO:0031624-IPI;GO:0031624-IEA;GO:0016567-IBA;GO:0016567-IEA;GO:0061630-IBA;GO:0061630-IEA;GO:0008270-IEA;GO:0008233-IEA;GO:0030163-IEA;GO:0043058-IMP;GO:0043058-IEA	cytoplasm-IBA;metal ion binding-IEA;ubiquitin ligase complex-IBA;membrane-IEA;proteolysis-IEA;ubiquitin-dependent protein catabolic process via the N-end rule pathway-IBA;ubiquitin-dependent protein catabolic process via the N-end rule pathway-IEA;integral component of membrane-IEA;negative regulation of glutamate metabolic process-IMP;negative regulation of glutamate metabolic process-IEA;transf…	11	GO:0000151;GO:0005737;GO:0008233;GO:0008270;GO:0016021;GO:0016567;GO:0031624;GO:0043058;GO:0061630;GO:0071596;GO:2000212	ubiquitin ligase complex;cytoplasm;peptidase activity;zinc ion binding;integral component of membrane;protein ubiquitination;ubiquitin conjugating enzyme binding;regulation of backward locomotion;ubiquitin protein ligase activity;ubiquitin-dependent protein catabolic process via the N-end rule pathway;negative regulation of glutamate metabolic process	-	-	IPR039164	REPEAT;FAMILY;FAMILY	Collagen triple helix repeat;E3 ubiquitin-protein ligase UBR1-like;E3 ubiquitin-protein ligase UBR1-like	PF18995 (PFAM);PTHR21497 (PANTHER);PTHR21497:SF24 (PANTHER)	;ubiquitin protein ligase activity/ubiquitin-dependent protein catabolic process via the N-end rule pathway;
MSTRG.2.1	ATP-dependent Clp protease adaptor protein ClpS	MIVDLVSAARQADWDRARELLFHHWGSECPKLYAPNPEHPWEISEDEKDINTALFVPLAGAFCADSSVTDSSLRPLIEQTGFSGEKHRTGQICGHVFKSGELTYSCKDCATDATCVMCHECFHQSEHKAHKYKMHTSNGAGYCDCGDKDAWSRGYACKLHEMNEDDNIPFFLPESLEARLRGLTCLILQYSTKLICWEKADVLPLDLSLMGIEKPEVSSVAPYVTVLYNDETHTYETVIRALEMFIHCTKDQAMLIATIVDREGRSSVKVGAKLDCERVKSDIQRRTLRDVNRRTEKTGPLDVKVMDGALVAHQNHAIALLAWLNSQIDAFPVLGSIVGDVLLNTIVEKDNDGLEVDETILVRLLRFDKKMWKSARANTHQMLMKTVLMNFEQKVSFSK…	1950	20	0	0.7591	ubr-1;ubr-1;ubr-1;NBR_LOCUS14733;ACOC_LOCUS4;WR25_21477;DICVIV_00473;ANCCAN_16040;HPLM_LOCUS14600;ubr-1;HPLM_LOCUS14600;NECAME_06616;WR25_21477;WR25_21477;ubr-1;ANCCAN_16040;NECAME_06616;HPBE_LOCUS11701;Acey_s0353.g3290;NECAME_06616;WR25_21477;Acey_s0353.g3290;HPBE_LOCUS11701;WR25_21477;HPBE_LOCUS11701;Acey_s0353.g3290;NECAME_06616;ubr-1;ubr-1;BPAG_LOCUS12849;ubr-1;ubr-1;ANCCEY_08689;BPAG_LOCUS12…	GO:0005737-IBA;GO:0046872-IEA;GO:0000151-IBA;GO:0016020-IEA;GO:0006508-IEA;GO:0071596-IBA;GO:0071596-IEA;GO:0016021-IEA;GO:2000212-IMP;GO:2000212-IEA;GO:0016740-IEA;GO:0031624-IPI;GO:0031624-IEA;GO:0016567-IBA;GO:0016567-IEA;GO:0061630-IBA;GO:0061630-IEA;GO:0008270-IEA;GO:0008233-IEA;GO:0030163-IEA;GO:0043058-IMP;GO:0043058-IEA	cytoplasm-IBA;metal ion binding-IEA;ubiquitin ligase complex-IBA;membrane-IEA;proteolysis-IEA;ubiquitin-dependent protein catabolic process via the N-end rule pathway-IBA;ubiquitin-dependent protein catabolic process via the N-end rule pathway-IEA;integral component of membrane-IEA;negative regulation of glutamate metabolic process-IMP;negative regulation of glutamate metabolic process-IEA;transf…	9	GO:0008233;GO:0008270;GO:0016567;GO:0031624;GO:0043058;GO:0061630;GO:0071596;GO:0110165;GO:2000212	peptidase activity;zinc ion binding;protein ubiquitination;ubiquitin conjugating enzyme binding;regulation of backward locomotion;ubiquitin protein ligase activity;ubiquitin-dependent protein catabolic process via the N-end rule pathway;cellular anatomical entity;negative regulation of glutamate metabolic process	-	-	IPR003769;IPR003126;IPR014719;IPR039164;IPR003126;IPR014719;IPR036390	DOMAIN;DOMAIN;DOMAIN;DOMAIN;HOMOLOGOUS_SUPERFAMILY;HOMOLOGOUS_SUPERFAMILY;HOMOLOGOUS_SUPERFAMILY;HOMOLOGOUS_SUPERFAMILY;HOMOLOGOUS_SUPERFAMILY;HOMOLOGOUS_SUPERFAMILY;FAMILY;FAMILY;DOMAIN;HOMOLOGOUS_SUPERFAMILY;HOMOLOGOUS_SUPERFAMILY	Adaptor protein ClpS, core;Adaptor protein ClpS, core;Zinc finger, UBR-type;Zinc finger, UBR-type;Ribosomal protein L7/L12, C-terminal/adaptor protein ClpS-like;Ribosomal protein L7/L12, C-terminal/adaptor protein ClpS-like;Ribosomal protein L7/L12, C-terminal/adaptor protein ClpS-like;Ribosomal protein L7/L12, C-terminal/adaptor protein ClpS-like;Ribosomal protein L7/L12, C-terminal/adaptor prot…	PF02617 (PFAM);G3DSA:2.10.110.30 (GENE3D);PF02207 (PFAM);PF18995 (PFAM);G3DSA:3.30.1390.10 (GENE3D);mobidb-lite (MOBIDB_LITE);mobidb-lite (MOBIDB_LITE);mobidb-lite (MOBIDB_LITE);mobidb-lite (MOBIDB_LITE);mobidb-lite (MOBIDB_LITE);PTHR21497 (PANTHER);PTHR21497:SF24 (PANTHER);PS51157 (PROSITE_PROFILES);SSF54736 (SUPERFAMILY);SSF46785 (SUPERFAMILY)	protein catabolic process;zinc ion binding;ubiquitin protein ligase activity/ubiquitin-dependent protein catabolic process via the N-end rule pathway;zinc ion binding;
transcript_ACOC_0000000301-mRNA-1	ATP-dependent Clp protease adaptor protein ClpS	MIVDLVSAARQADWDRARELLFHHWGSECPKLYAPNPEHPWEISEDEKDINTALFVPLAGAFCADSSVTDSSLRPLIEQTGFSGEKHRTGQICGHVFKSGELTYSCKDCATDATCVMCHECFHQSEHKAHKYKMHTSNGAGYCDCGDKDAWSRGYACKLHEMNEDDNIPFFLPESLEARLRGLTCLILQYSTKLICWEKADVLPLDLSLMGIEKPEVSSVAPYVTVLYNDETHTYETVIRALEMFIHCTKDQAMLIATIVDREGRSSVKVGAKLDCERVKSDIQRRTLRDVNRRTEKTGPLDVKVMDGALVAHQNHAIALLAWLNSQIDAFPVLGSIVGDVLLNTIVEKDNDGLEVDETILVRLLRFDKKMWKSARANTHQMLMKTVLMNFEQKVSFSK…	1862	20	0	0.7801	NBR_LOCUS14733;ACOC_LOCUS4;WR25_21477;DICVIV_00473;ANCCAN_16040;HPLM_LOCUS14600;HPLM_LOCUS14600;NECAME_06616;CGOC_LOCUS150;WR25_21477;WR25_21477;CGOC_LOCUS150;ANCCAN_16040;NECAME_06616;HPBE_LOCUS11701;Acey_s0353.g3290;NECAME_06616;WR25_21477;Acey_s0353.g3290;HPBE_LOCUS11701;WR25_21477;HPBE_LOCUS11701;Acey_s0353.g3290;NECAME_06616;ubr-1;BPAG_LOCUS12849;ANCCEY_08689;BPAG_LOCUS12849;ANCDUO_05853;ubr…	GO:0005737-IBA;GO:0046872-IEA;GO:0000151-IBA;GO:0006508-IEA;GO:0071596-IBA;GO:0071596-IEA;GO:2000212-IEA;GO:0016740-IEA;GO:0031624-IEA;GO:0016567-IBA;GO:0016567-IEA;GO:0061630-IBA;GO:0061630-IEA;GO:0008270-IEA;GO:0008233-IEA;GO:0030163-IEA;GO:0043058-IEA	cytoplasm-IBA;metal ion binding-IEA;ubiquitin ligase complex-IBA;proteolysis-IEA;ubiquitin-dependent protein catabolic process via the N-end rule pathway-IBA;ubiquitin-dependent protein catabolic process via the N-end rule pathway-IEA;negative regulation of glutamate metabolic process-IEA;transferase activity-IEA;ubiquitin conjugating enzyme binding-IEA;protein ubiquitination-IBA;protein ubiquiti…	5	GO:0008233;GO:0008270;GO:0016567;GO:0061630;GO:0071596	peptidase activity;zinc ion binding;protein ubiquitination;ubiquitin protein ligase activity;ubiquitin-dependent protein catabolic process via the N-end rule pathway	-	-	IPR003126;IPR003769;IPR014719;IPR039164;IPR003126;IPR014719;IPR036390	DOMAIN;DOMAIN;DOMAIN;HOMOLOGOUS_SUPERFAMILY;HOMOLOGOUS_SUPERFAMILY;HOMOLOGOUS_SUPERFAMILY;HOMOLOGOUS_SUPERFAMILY;HOMOLOGOUS_SUPERFAMILY;HOMOLOGOUS_SUPERFAMILY;FAMILY;FAMILY;DOMAIN;HOMOLOGOUS_SUPERFAMILY;HOMOLOGOUS_SUPERFAMILY	Zinc finger, UBR-type;Adaptor protein ClpS, core;Adaptor protein ClpS, core;Ribosomal protein L7/L12, C-terminal/adaptor protein ClpS-like;Ribosomal protein L7/L12, C-terminal/adaptor protein ClpS-like;Ribosomal protein L7/L12, C-terminal/adaptor protein ClpS-like;Ribosomal protein L7/L12, C-terminal/adaptor protein ClpS-like;Ribosomal protein L7/L12, C-terminal/adaptor protein ClpS-like;Ribosoma…	PF02207 (PFAM);PF02617 (PFAM);G3DSA:2.10.110.30 (GENE3D);G3DSA:3.30.1390.10 (GENE3D);mobidb-lite (MOBIDB_LITE);mobidb-lite (MOBIDB_LITE);mobidb-lite (MOBIDB_LITE);mobidb-lite (MOBIDB_LITE);mobidb-lite (MOBIDB_LITE);PTHR21497 (PANTHER);PTHR21497:SF24 (PANTHER);PS51157 (PROSITE_PROFILES);SSF54736 (SUPERFAMILY);SSF46785 (SUPERFAMILY)	zinc ion binding;protein catabolic process;ubiquitin protein ligase activity/ubiquitin-dependent protein catabolic process via the N-end rule pathway;zinc ion binding;
transcript_ACOC_0000000401-mRNA-1	NHL repeat protein	MTSVPSLLALLAITYAAPGPPIQDDGLQFYNIQGGEELPIDDDVPLEYEEGEQGEAFILPTSKILGEISGLTMDLKGRLVAFHRANREWNQNSFDGKGVFNKKLGPIKNFTIAVIDTSNGKAIHERRRKKSSGESIENSEAMIHPLDWKSGN	152	20	2.4e-108	0.7723	TCNE_LOCUS12126;HPBE_LOCUS20174;HPLM_LOCUS18142;Acey_s0336.g2881;Acey_s0336.g2881;Acey_s0336.g2881;NECAME_06614;Acey_s0336.g2881;HPLM_LOCUS18142;NECAME_06614;TELCIR_03755;Acey_s0336.g2881;TCNE_LOCUS12126;NBR_LOCUS15476;NBR_LOCUS16400;Acey_s0336.g2881;HPBE_LOCUS20174;Acey_s0336.g2881;TCNE_LOCUS12126;Acey_s0336.g2881;Acey_s0336.g2881;NECAME_06614;Acey_s0336.g2881;NBR_LOCUS15476;TELCIR_03755;F21F3.1…	GO:0006518-IEA;GO:0003824-IEA;GO:0016020-IEA;GO:0016829-IEA	peptide metabolic process-IEA;catalytic activity-IEA;membrane-IEA;lyase activity-IEA	3	GO:0003824;GO:0006518;GO:0016020	catalytic activity;peptide metabolic process;membrane	-	-	IPR011042	HOMOLOGOUS_SUPERFAMILY;HOMOLOGOUS_SUPERFAMILY;HOMOLOGOUS_SUPERFAMILY;HOMOLOGOUS_SUPERFAMILY	Six-bladed beta-propeller, TolB-like;Six-bladed beta-propeller, TolB-like;Six-bladed beta-propeller, TolB-like;Six-bladed beta-propeller, TolB-like	G3DSA:2.120.10.30 (GENE3D);mobidb-lite (MOBIDB_LITE);PTHR10680 (PANTHER);PTHR10680:SF14 (PANTHER)	;
MSTRG.4.1	NHL repeat protein	MTSVPSLLALLAITYAAPGPPIQDDGLQFYNIQGGEELPIDDDVPLEYEEGEQGEAFILPTSKILGEISGLTMDLKGRLVAFHRANREWNQNSFDGKGVFNKKLGPIKNFTIAVIDTSNGKIIEEHGKDMFYMPHGLAVDHKGNYWVTDVGSHQVHKLDSSFRPVLSIGEKLVPGDDDHHFCMPTDVAVAKNGYFFIADGYCNNRVLKFDPTGKLVGTFGAAVDELGSSEFVIPHSLALIEDMNLICVADRENERVQCFSAGLAEGHRTIPAGIPITSADQIGRVYAIREKKHYLVGVTGRDEKDQLPPQLFVMDMTNGKANTFVKGIENPHSLAISDEGTVYISQMHPNQITQISLPSQA	361	20	0	0.8484	TCNE_LOCUS12126;HPBE_LOCUS20174;HPLM_LOCUS18142;TCLT_LOCUS10689;WR25_23577;WR25_15980;WR25_23577;Acey_s0336.g2881;WR25_15980;Acey_s0336.g2881;ACOC_LOCUS6;Acey_s0336.g2881;NECAME_06614;ANCCEY_08690;HPLM_LOCUS18142;NECAME_06614;ANCCEY_08690;WR25_15980;TCLT_LOCUS10689;TELCIR_03755;Acey_s0336.g2881;ANCCEY_08690;TCLT_LOCUS10689;TCNE_LOCUS12126;NBR_LOCUS15476;Acey_s0336.g2881;HPBE_LOCUS20174;TCNE_LOCUS…	GO:0006518-IEA;GO:0003824-IEA;GO:0016020-IEA;GO:0016829-IEA	peptide metabolic process-IEA;catalytic activity-IEA;membrane-IEA;lyase activity-IEA	3	GO:0003824;GO:0006518;GO:0016020	catalytic activity;peptide metabolic process;membrane	-	-	IPR000720;IPR001258;IPR011042;IPR013017;IPR013017;IPR013017;IPR013017	FAMILY;REPEAT;HOMOLOGOUS_SUPERFAMILY;HOMOLOGOUS_SUPERFAMILY;HOMOLOGOUS_SUPERFAMILY;REPEAT;REPEAT;REPEAT;REPEAT;REPEAT;REPEAT	Peptidylglycine alpha-hydroxylating monooxygenase/peptidyl-hydroxyglycine alpha-amidating lyase;NHL repeat;Six-bladed beta-propeller, TolB-like;Six-bladed beta-propeller, TolB-like;Six-bladed beta-propeller, TolB-like;NHL repeat, subgroup;NHL repeat, subgroup;NHL repeat, subgroup;NHL repeat, subgroup;NHL repeat, subgroup;NHL repeat, subgroup	PR00790 (PRINTS);PF01436 (PFAM);G3DSA:2.120.10.30 (GENE3D);PTHR10680 (PANTHER);PTHR10680:SF14 (PANTHER);PS51125 (PROSITE_PROFILES);PS51125 (PROSITE_PROFILES);PS51125 (PROSITE_PROFILES);PS51125 (PROSITE_PROFILES);cd14958 (CDD);SSF101898 (SUPERFAMILY)	peptide metabolic process/membrane/catalytic activity;protein binding;
transcript_ACOC_0000000601-mRNA-1	WD domain, G-beta repeat protein	MVAMIDTEEVDDYTVICKQKNAHNRGLVGIWAFRAGNGLVGLVTVGQDSVKLWRMDETVSGVVTLTSKVEIQEWRTAVQSADVTNDGKCICLVTIDSMFYEIILGDEGPVVMTHDFGVMEAWHVRIAKTKTNYITTAFSGFLKEIDLNGKVSRQEPFQYAKSVGALSFGNGSKRLAISTFEGVLHIIDAKTLKSETTIEAHSKRIRALAFLPGEDDILTGSDDKTIKLHSVSGERPKVERVYCGHRSPVLSLAIDERADGTRFASSSLDGQILLWHIEQPSALQHLPSPHASAVTTVVFLPTGRHLVSGGEDGVVACYRIPQAGMLSPGNIDQDNDNIGYLDQQDEIEPTDIDQAIHYDR	360	20	0	0.8601	WR25_09212;NECAME_06612;NECAME_06612	GO:0034511-IEA;GO:0006364-IEA;GO:0005576-IEA	U3 snoRNA binding-IEA;rRNA processing-IEA;extracellular region-IEA	2	GO:0006364;GO:0034511	rRNA processing;U3 snoRNA binding	-	-	IPR001680;IPR015943;IPR017986;IPR001680;IPR001680;IPR001680;IPR036322	REPEAT;HOMOLOGOUS_SUPERFAMILY;HOMOLOGOUS_SUPERFAMILY;DOMAIN;REPEAT;REPEAT;REPEAT;HOMOLOGOUS_SUPERFAMILY	WD40 repeat;WD40/YVTN repeat-like-containing domain superfamily;WD40/YVTN repeat-like-containing domain superfamily;WD40-repeat-containing domain;WD40 repeat;WD40 repeat;WD40 repeat;WD40-repeat-containing domain superfamily	PF00400 (PFAM);G3DSA:2.130.10.10 (GENE3D);PTHR44090 (PANTHER);PS50294 (PROSITE_PROFILES);PS50082 (PROSITE_PROFILES);PS50082 (PROSITE_PROFILES);PS50082 (PROSITE_PROFILES);SSF50978 (SUPERFAMILY)	protein binding;protein binding;protein binding;protein binding;protein binding;protein binding;protein binding
transcript_ACOC_0000000701-mRNA-1	C. briggsae CBR-NLP-8 protein	MNDVVKSPFAMNDGRFFREMVDYSSAQPTKRAFDRVESNDFGLFKRAPAKRAFDRLDMADFGFRKKRAFDRIARAEFGFEGLRKKRAFDRLSIADFGLRKKRVFDRLSATEFGLIKRSMESYPTRDEVIDDLTASIMWLRDNVPQSATKLVSVSADEQRK	160	20	1e-109	0.7408	GPUH_LOCUS11792;TCNE_LOCUS16579;TCNE_LOCUS16579;GPUH_LOCUS11792;Tcan_09211;Tcan_09211;ANCCAN_17489;ANCCAN_17489	GO:0007165-IEA;GO:0005184-IEA	signal transduction-IEA;neuropeptide hormone activity-IEA	2	GO:0005184;GO:0007165	neuropeptide hormone activity;signal transduction	-	-	-	-	-	-	-
MSTRG.8.1	cAMP-dependent protein kinase catalytic subunit	MLKFLKNKTSDEGSSSKESKSSSGIKEFLDKAREDFKQRWDNPAQNTAVLDDFDRIKTLGTGSFGRVMLVKHKQSSSYYAMKILDKQKVVKLKQVEHTLNEKRILQAIDFPFLVNMQYSFKDNSNLYMVLEFISGGEMFSHLRRIGRFSEPHSRFYAAQIVLAFEYLHSLDLIYRDLKPENLLIDSTGYLKITDFGFAKRVKGRTWTLCGTPEYLAPEIILSKGYNKAVDWWALGVLIYEMAAGYPPFFADQPIQIYEKIVSGKVKFPSHFSNELKDLLKNLLQVDLTKRFGNLKNGVADIKNHKWFGSTDWIAIYQRKIAPASFSKCEPGRLLEALYPRVEGPADTRHFVEEVKEDEHWAIAAENQHADTFADF	375	20	0	0.937	ACOC_LOCUS10;kin-1;WR25_00303;TELCIR_00871;WR25_00303;WR25_00303;TELCIR_00871;WR25_00303;kin-1;kin-1;WR25_00303;Acey_s0001.g321;WR25_00303;kin-1;WR25_00303;WR25_00303;WR25_00303;Acey_s0001.g321;Acey_s0001.g321;kin-1;ACOC_LOCUS10;Acey_s0001.g321;WR25_00303;WR25_00303;Acey_s0001.g321;kin-1;Acey_s0001.g321;kin-1;WR25_00303;WR25_00303;Cni-kin-1;WR25_00303;TELCIR_00871;Cni-kin-1;WR25_00303;kin-1;kin-1…	GO:0004679-IEA;GO:0000166-IEA;GO:0071333-IEA;GO:0010737-IBA;GO:0010737-IEA;GO:0034237-IEA;GO:0016310-IEA;GO:0016740-IEA;GO:0016301-IEA;GO:1900195-IMP;GO:0004691-IDA;GO:0004691-IEA;GO:0007186-IEA;GO:0004672-IEA;GO:0004674-IEA;GO:0005524-IEA;GO:0005634-IBA;GO:0006468-IDA;GO:0006468-IEA;GO:0005952-ISS	AMP-activated protein kinase activity-IEA;nucleotide binding-IEA;cellular response to glucose stimulus-IEA;protein kinase A signaling-IBA;protein kinase A signaling-IEA;protein kinase A regulatory subunit binding-IEA;phosphorylation-IEA;transferase activity-IEA;kinase activity-IEA;positive regulation of oocyte maturation-IMP;cAMP-dependent protein kinase activity-IDA;cAMP-dependent protein kinase…	11	GO:0004679;GO:0004691;GO:0005524;GO:0005634;GO:0005952;GO:0006468;GO:0007186;GO:0010737;GO:0034237;GO:0071333;GO:1900195	AMP-activated protein kinase activity;cAMP-dependent protein kinase activity;ATP binding;nucleus;cAMP-dependent protein kinase complex;protein phosphorylation;G protein-coupled receptor signaling pathway;protein kinase A signaling;protein kinase A regulatory subunit binding;cellular response to glucose stimulus;positive regulation of oocyte maturation	EC:2.7.11.11	cAMP-dependent protein kinase	IPR000719;IPR039083;IPR000719;IPR011009	DOMAIN;DOMAIN;DOMAIN;DOMAIN;FAMILY;FAMILY;DOMAIN;DOMAIN;HOMOLOGOUS_SUPERFAMILY	Protein kinase domain;Protein kinase domain;Protein kinase domain;Protein kinase domain;cAMP-dependent protein kinase catalytic subunit beta;cAMP-dependent protein kinase catalytic subunit beta;Protein kinase domain;Protein kinase domain;Protein kinase-like domain superfamily	PF00069 (PFAM);G3DSA:3.30.200.20 (GENE3D);G3DSA:1.10.510.10 (GENE3D);mobidb-lite (MOBIDB_LITE);PTHR24353:SF116 (PANTHER);PTHR24353 (PANTHER);PS50011 (PROSITE_PROFILES);cd14209 (CDD);SSF56112 (SUPERFAMILY)	ATP binding/protein kinase activity/protein phosphorylation;protein serine/threonine kinase activity/cAMP-dependent protein kinase activity/protein kinase A regulatory subunit binding/G protein-coupled receptor signaling pathway;ATP binding/protein kinase activity/protein phosphorylation;
MSTRG.8.2	cAMP-dependent protein kinase catalytic subunit	MLKFLKNKTSDEGSSSKESKSSSGIKEFLDKAREDFKQRWDNPAQNTAVLDDFDRIKTLGTGSFGRVMLVKHKQSSSYYAMKILDKQKVVKLKQVEHTLNEKRILQAIDFPFLVNMQYSFKDNSNLYMVLEFISGGEMFSHLRRIGRFSEPHSRFYAAQIVLAFEYLHSLDLIYRDLKPENLLIDSTGYLKITDFGFAKRVKGRTWTLCGTPEYLAPEIILSKGYNKAVDWWALGVLIYEMAAGYPPFFADQPIQIYEKIVSGKVKFPSHFSNELKDLLKNLLQVDLTKRFGNLKNGVADIKNHKWFGSTDWIAIYQRKVEAPFLPKCRGPGDASNFDDYEEEPLRISGTEKCSKEFAEF	360	20	0	0.9806	FL81_11244;TELCIR_00871;kin-1;WR25_00303;TELCIR_00871;FL81_11244;FL82_13162;kin-1;LOAG_18601;LOAG_18601;Cni-kin-1;Cni-kin-1;FL82_13162;FL81_11244;LOAG_18601;WR25_00303;WR25_00303;NECAME_14910;AcPKA;FL82_13162;WR25_00303;WR25_00303;WR25_00303;Bma-kin-1;kin-1;Bma-kin-1;Cni-kin-1;Cni-kin-1;Cni-kin-1;WR25_00303;Bma-kin-1;WR25_00303;NECAME_14910;WR25_00303;kin-1;WR25_00303;WR25_00303;AcPKA;Bma-kin-1;C…	GO:0004679-IEA;GO:0000166-IEA;GO:0010737-IBA;GO:0034237-IEA;GO:0016310-IEA;GO:0016740-IEA;GO:0016301-IEA;GO:1900195-IMP;GO:0004691-IDA;GO:0004691-IEA;GO:0007186-IEA;GO:0004672-IEA;GO:0004674-IEA;GO:0005524-IEA;GO:0005634-IBA;GO:0006468-IDA;GO:0006468-IEA;GO:0005952-ISS	AMP-activated protein kinase activity-IEA;nucleotide binding-IEA;protein kinase A signaling-IBA;protein kinase A regulatory subunit binding-IEA;phosphorylation-IEA;transferase activity-IEA;kinase activity-IEA;positive regulation of oocyte maturation-IMP;cAMP-dependent protein kinase activity-IDA;cAMP-dependent protein kinase activity-IEA;G protein-coupled receptor signaling pathway-IEA;protein ki…	10	GO:0004679;GO:0004691;GO:0005524;GO:0005634;GO:0005952;GO:0006468;GO:0007186;GO:0010737;GO:0034237;GO:1900195	AMP-activated protein kinase activity;cAMP-dependent protein kinase activity;ATP binding;nucleus;cAMP-dependent protein kinase complex;protein phosphorylation;G protein-coupled receptor signaling pathway;protein kinase A signaling;protein kinase A regulatory subunit binding;positive regulation of oocyte maturation	EC:2.7.11.11	cAMP-dependent protein kinase	IPR000719;IPR039083;IPR000719;IPR000961;IPR011009	FAMILY;FAMILY;DOMAIN;DOMAIN;DOMAIN;FAMILY;DOMAIN;DOMAIN;DOMAIN;HOMOLOGOUS_SUPERFAMILY	E3 ubiquitin ligase RBR family;E3 ubiquitin ligase RBR family;Protein kinase domain;Protein kinase domain;Protein kinase domain;cAMP-dependent protein kinase catalytic subunit beta;Protein kinase domain;AGC-kinase, C-terminal;AGC-kinase, C-terminal;Protein kinase-like domain superfamily	G3DSA:1.10.510.10 (GENE3D);G3DSA:3.30.200.20 (GENE3D);PF00069 (PFAM);mobidb-lite (MOBIDB_LITE);PTHR24353 (PANTHER);PTHR24353:SF116 (PANTHER);PS50011 (PROSITE_PROFILES);PS51285 (PROSITE_PROFILES);cd14209 (CDD);SSF56112 (SUPERFAMILY)	;ATP binding/protein kinase activity/protein phosphorylation;protein serine/threonine kinase activity/cAMP-dependent protein kinase activity/protein kinase A regulatory subunit binding/G protein-coupled receptor signaling pathway;ATP binding/protein kinase activity/protein phosphorylation;ATP binding/protein serine/threonine kinase activity/protein phosphorylation;
MSTRG.8.3	cAMP-dependent protein kinase catalytic subunit	MRSRRVGAHARRLRRGRQANTGAPVHTSLRPSMSSSNKKLQIKFFKEFLDKAREDFKQRWDNPAQNTAVLDDFDRIKTLGTGSFGRVMLVKHKQSSSYYAMKILDKQKVVKLKQVEHTLNEKRILQAIDFPFLVNMQYSFKDNSNLYMVLEFISGGEMFSHLRRIGRFSEPHSRFYAAQIVLAFEYLHSLDLIYRDLKPENLLIDSTGYLKITDFGFAKRVKGRTWTLCGTPEYLAPEIILSKGYNKAVDWWALGVLIYEMAAGYPPFFADQPIQIYEKIVSGKVKFPSHFSNELKDLLKNLLQVDLTKRFGNLKNGVADIKNHKWFGSTDWIAIYQRKVEAPFLPKCRGPGDASNFDDYEEEPLRISGTEKCSKEFAEF	380	20	0	0.9806	FL81_11244;TELCIR_00871;kin-1;WR25_00303;TELCIR_00871;FL81_11244;FL82_13162;kin-1;LOAG_18601;LOAG_18601;Cni-kin-1;Cni-kin-1;FL82_13162;FL81_11244;LOAG_18601;WR25_00303;WR25_00303;NECAME_14910;AcPKA;FL82_13162;WR25_00303;WR25_00303;WR25_00303;Bma-kin-1;kin-1;Bma-kin-1;Cni-kin-1;Cni-kin-1;Cni-kin-1;WR25_00303;Bma-kin-1;WR25_00303;NECAME_14910;WR25_00303;kin-1;WR25_00303;WR25_00303;AcPKA;Bma-kin-1;C…	GO:0004679-IEA;GO:0000166-IEA;GO:0010737-IBA;GO:0034237-IEA;GO:0016310-IEA;GO:0016740-IEA;GO:0016301-IEA;GO:1900195-IMP;GO:0004691-IDA;GO:0004691-IEA;GO:0007186-IEA;GO:0004672-IEA;GO:0004674-IEA;GO:0005524-IEA;GO:0005634-IBA;GO:0006468-IDA;GO:0006468-IEA;GO:0005952-ISS	AMP-activated protein kinase activity-IEA;nucleotide binding-IEA;protein kinase A signaling-IBA;protein kinase A regulatory subunit binding-IEA;phosphorylation-IEA;transferase activity-IEA;kinase activity-IEA;positive regulation of oocyte maturation-IMP;cAMP-dependent protein kinase activity-IDA;cAMP-dependent protein kinase activity-IEA;G protein-coupled receptor signaling pathway-IEA;protein ki…	10	GO:0004679;GO:0004691;GO:0005524;GO:0005634;GO:0005952;GO:0006468;GO:0007186;GO:0010737;GO:0034237;GO:1900195	AMP-activated protein kinase activity;cAMP-dependent protein kinase activity;ATP binding;nucleus;cAMP-dependent protein kinase complex;protein phosphorylation;G protein-coupled receptor signaling pathway;protein kinase A signaling;protein kinase A regulatory subunit binding;positive regulation of oocyte maturation	EC:2.7.11.11	cAMP-dependent protein kinase	IPR000719;IPR039083;IPR000961;IPR000719;IPR011009	HOMOLOGOUS_SUPERFAMILY;DOMAIN;DOMAIN;DOMAIN;DOMAIN;FAMILY;FAMILY;DOMAIN;DOMAIN;DOMAIN;HOMOLOGOUS_SUPERFAMILY	Immunoglobulin E-set;Protein kinase domain;Protein kinase domain;Protein kinase domain;Protein kinase domain;cAMP-dependent protein kinase catalytic subunit beta;cAMP-dependent protein kinase catalytic subunit beta;AGC-kinase, C-terminal;Protein kinase domain;Protein kinase domain;Protein kinase-like domain superfamily	G3DSA:3.30.200.20 (GENE3D);PF00069 (PFAM);G3DSA:1.10.510.10 (GENE3D);mobidb-lite (MOBIDB_LITE);mobidb-lite (MOBIDB_LITE);PTHR24353:SF116 (PANTHER);PTHR24353 (PANTHER);PS51285 (PROSITE_PROFILES);PS50011 (PROSITE_PROFILES);cd14209 (CDD);SSF56112 (SUPERFAMILY)	;ATP binding/protein kinase activity/protein phosphorylation;protein serine/threonine kinase activity/cAMP-dependent protein kinase activity/protein kinase A regulatory subunit binding/G protein-coupled receptor signaling pathway;ATP binding/protein serine/threonine kinase activity/protein phosphorylation;ATP binding/protein kinase activity/protein phosphorylation;
transcript_ACOC_0000000901-mRNA-1	cAMP-dependent protein kinase catalytic subunit	MCVESELSITNSTEVFFLSVKEFLDKAREDFKQRWDNPAQNTAVLDDFDRIKTLGTGSFGRVMLVKHKQSSSYYAMKILDKQKVVKLKQVEHTLNEKRILQAIDFPFLVNMQYSFKDNSNLYMVLEFISGGEMFSHLRRIGRFSEPHSRFYAAQIVLAFEYLHSLDLIYRDLKPENLLIDSTGYLKITDFGFAKRVKGRTWTLCGTPEYLAPEIILSKGYNKAVDWWALGVLIYEMAAGYPPFFADQPIQIYEKIVSGKVKFPSHFSNELKDLLKNLLQVDLTKRFGNLKNGVADIKNHKWFGSTDWIAIYQRKIAPASFSKCEPGRLLEALYPRVEGPADTRHFVEEVKEDEHWAIAAENQHADTFADF	370	20	0	0.9461	ACOC_LOCUS10;kin-1;WR25_00303;TELCIR_00871;WR25_00303;WR25_00303;TELCIR_00871;WR25_00303;Cre-kin-1;kin-1;kin-1;WR25_00303;Cre-kin-1;Acey_s0001.g321;kin-1;WR25_00303;WR25_00303;Acey_s0001.g321;Acey_s0001.g321;kin-1;ACOC_LOCUS10;Acey_s0001.g321;WR25_00303;Acey_s0001.g321;Cre-kin-1;kin-1;Acey_s0001.g321;kin-1;WR25_00303;WR25_00303;Cni-kin-1;WR25_00303;TELCIR_00871;Cni-kin-1;WR25_00303;kin-1;kin-1;TE…	GO:0004679-IEA;GO:0000166-IEA;GO:0071333-IEA;GO:0010737-IBA;GO:0010737-IEA;GO:0034237-IEA;GO:0016310-IEA;GO:0016740-IEA;GO:0016301-IEA;GO:1900195-IMP;GO:0004691-IDA;GO:0004691-IEA;GO:0007186-IEA;GO:0004672-IEA;GO:0004674-IEA;GO:0005524-IEA;GO:0005634-IBA;GO:0006468-IDA;GO:0006468-IEA;GO:0005952-ISS	AMP-activated protein kinase activity-IEA;nucleotide binding-IEA;cellular response to glucose stimulus-IEA;protein kinase A signaling-IBA;protein kinase A signaling-IEA;protein kinase A regulatory subunit binding-IEA;phosphorylation-IEA;transferase activity-IEA;kinase activity-IEA;positive regulation of oocyte maturation-IMP;cAMP-dependent protein kinase activity-IDA;cAMP-dependent protein kinase…	11	GO:0004679;GO:0004691;GO:0005524;GO:0005634;GO:0005952;GO:0006468;GO:0007186;GO:0010737;GO:0034237;GO:0071333;GO:1900195	AMP-activated protein kinase activity;cAMP-dependent protein kinase activity;ATP binding;nucleus;cAMP-dependent protein kinase complex;protein phosphorylation;G protein-coupled receptor signaling pathway;protein kinase A signaling;protein kinase A regulatory subunit binding;cellular response to glucose stimulus;positive regulation of oocyte maturation	EC:2.7.11.11	cAMP-dependent protein kinase	IPR000719;IPR039083;IPR000719;IPR011009	HOMOLOGOUS_SUPERFAMILY;DOMAIN;DOMAIN;FAMILY;FAMILY;DOMAIN;DOMAIN;HOMOLOGOUS_SUPERFAMILY	Nop domain superfamily;Protein kinase domain;Protein kinase domain;cAMP-dependent protein kinase catalytic subunit beta;cAMP-dependent protein kinase catalytic subunit beta;Protein kinase domain;Protein kinase domain;Protein kinase-like domain superfamily	G3DSA:3.30.200.20 (GENE3D);PF00069 (PFAM);G3DSA:1.10.510.10 (GENE3D);PTHR24353:SF116 (PANTHER);PTHR24353 (PANTHER);PS50011 (PROSITE_PROFILES);cd14209 (CDD);SSF56112 (SUPERFAMILY)	;ATP binding/protein kinase activity/protein phosphorylation;protein serine/threonine kinase activity/cAMP-dependent protein kinase activity/protein kinase A regulatory subunit binding/G protein-coupled receptor signaling pathway;ATP binding/protein kinase activity/protein phosphorylation;
MSTRG.11.1	DHHC zinc finger domain protein	MILRLDPCGLICVLMIYGSVVYADYVVTIWMVMPVFGNSVWGAFHITLFNTLIFMTLFSHGRTMFTDPGIVPILKNKIFHDRSAQFGLMSSSSEDDCPSDREAMMLHSGDSAVADWTMCTRCESFRPPRAHHCRVCRRCIRKMDHHCPWVNNSCTRYLMILSWIYDDEFATTGLKGPFGENAHHAKVLHSIFLSMECAVFGMFVLAVSCDQLGAIFSEETAVEAAQRRTKQVYKRGSRKGRFALLREVCGGGSLYSWFIPCSSPPVSRDHCVDRRKLNHIDI	282	20	0	0.7292	Acey_s0479.g2229;WBA_LOCUS5139;BPAG_LOCUS570;NAV_LOCUS2292;ACOC_LOCUS12;Zdhhc7;ANCCEY_12320;DICVIV_00479;Bma-dhhc-7;SRAE_1000319800;WBA_LOCUS5139;HPLM_LOCUS75;Acey_s0479.g2229;ACOC_LOCUS12;bma-dhhc-7;WBA_LOCUS5139;NAV_LOCUS2292;Acey_s0479.g2229;DICVIV_00479;SRAE_1000319800;SRAE_1000319800;Acey_s0479.g2229;Acey_s0479.g2229;L596_009062;bma-dhhc-7;Zdhhc7;ANCCAN_22074;LOAG_07873;SRAE_1000319800;Acey_…	GO:0016746-IEA;GO:0019706-IEA;GO:0016409-IEA;GO:0016020-IEA;GO:0016021-IEA;GO:0016740-IEA	transferase activity, transferring acyl groups-IEA;protein-cysteine S-palmitoyltransferase activity-IEA;palmitoyltransferase activity-IEA;membrane-IEA;integral component of membrane-IEA;transferase activity-IEA	2	GO:0016021;GO:0019706	integral component of membrane;protein-cysteine S-palmitoyltransferase activity	EC:2.3.1.225	Protein S-acyltransferase	IPR001594	DOMAIN;DOMAIN;DOMAIN;DOMAIN	Palmitoyltransferase, DHHC domain;Palmitoyltransferase, DHHC domain;Palmitoyltransferase, DHHC domain;Palmitoyltransferase, DHHC domain	PF01529 (PFAM);PTHR22883:SF40 (PANTHER);PTHR22883 (PANTHER);PS50216 (PROSITE_PROFILES)	palmitoyltransferase activity;
transcript_ACOC_0000001101-mRNA-1	DHHC zinc finger domain protein	MILRLDPCGLICVLMIYGSVVYADYVVTIWMVMPVFGNSVWGAFHITLFNTLIFMTLFSHGRTMFTDPGIVPILKNKYVYTELISHLFYKIRAYTHWTMCTRCESFRPPRAHHCRVCRRCIRKMDHHCPWVNNCVGEFNQKFFLQFLFYVGLSIMILSWIYDDEFATTGLKGPFGENAHHAKVLHSIFLSMECAVFGMFVLAVSCDQLGAIFSEETAVEAAQRRTKQVYKRGSRKGRFALLREVCGGGSLYSWFIPCSSPPVSRDHCVDRRKLNHIDI	278	20	0	0.7519	Acey_s0479.g2229;BPAG_LOCUS570;ACOC_LOCUS12;Zdhhc7;ANCCEY_12320;DICVIV_00479;Bma-dhhc-7;HPLM_LOCUS75;Cni-dhhc-7;Acey_s0479.g2229;Cni-dhhc-7;ACOC_LOCUS12;dhhc-7;bma-dhhc-7;Acey_s0479.g2229;DICVIV_00479;dhhc-7;Acey_s0479.g2229;dhhc-7;Acey_s0479.g2229;L596_009062;dhhc-7;bma-dhhc-7;Zdhhc7;ANCCAN_22074;LOAG_07873;WR25_20787;Acey_s0479.g2229;Bma-dhhc-7;DICVIV_00479;HPLM_LOCUS75;LOAG_07873;Zdhhc7;ANCCEY…	GO:0016746-IEA;GO:0019706-IBA;GO:0019706-IEA;GO:0018230-IBA;GO:0016409-IEA;GO:0016020-IEA;GO:0016021-IEA;GO:0016740-IEA;GO:0005783-IBA;GO:0005794-IBA;GO:0006612-IBA	transferase activity, transferring acyl groups-IEA;protein-cysteine S-palmitoyltransferase activity-IBA;protein-cysteine S-palmitoyltransferase activity-IEA;peptidyl-L-cysteine S-palmitoylation-IBA;palmitoyltransferase activity-IEA;membrane-IEA;integral component of membrane-IEA;transferase activity-IEA;endoplasmic reticulum-IBA;Golgi apparatus-IBA;protein targeting to membrane-IBA	6	GO:0005737;GO:0009987;GO:0012505;GO:0016021;GO:0019706;GO:0043231	cytoplasm;cellular process;endomembrane system;integral component of membrane;protein-cysteine S-palmitoyltransferase activity;intracellular membrane-bounded organelle	EC:2.3.1.225	Protein S-acyltransferase	IPR001594	DOMAIN;DOMAIN;DOMAIN;DOMAIN	Palmitoyltransferase, DHHC domain;Palmitoyltransferase, DHHC domain;Palmitoyltransferase, DHHC domain;Palmitoyltransferase, DHHC domain	PF01529 (PFAM);PTHR22883:SF40 (PANTHER);PTHR22883 (PANTHER);PS50216 (PROSITE_PROFILES)	palmitoyltransferase activity;
transcript_ACOC_0000001201-mRNA-1	MSP domain protein	MFRFTDQLLDFLDIVNGTFLFASSSSTSPSMLSASWKVVKSWLDPSHPQLHHVTKETMSQFVDSRNVPLHMGGEDHFKFTMDDLAKCLPASRKDNSQMTTSEIGYSFERNGLDSIIKRAVTFDDDDEEANRKVLLTISRKSSNWSVKRNIPQCLKTVIDARLHSPETDWVKNAFLQISPRDVLNLSRIDNITDYVDIVIVRNISHVSVMFKIKTTSPEKFRVRPTTGVIPPESTEIIRAYLQSEYKDSCAREKFLLLALESEN	263	20	0	0.7348	HPLM_LOCUS12317;Acey_s0277.g1106;ACOC_LOCUS4597;ASIM_LOCUS13923;NBR_LOCUS10637;DICVIV_07143;ASIM_LOCUS13923;HPBE_LOCUS11196;X798_03449;WR25_08424;PRIPAC_50469;NAV_LOCUS3004;L596_030535;Acey_s0277.g1106;ASIM_LOCUS13923;L596_030535;NECAME_09261;X798_03449;Acey_s0277.g1106;X798_03449;PRIPAC_50469;WR25_08424;HPBE_LOCUS11196;NECAME_09261;L596_030535;Acey_s0277.g1106;CGOC_LOCUS9193;PRIPAC_50469;HPLM_LO…	GO:0005856-IEA;GO:0016020-IEA;GO:0016021-IEA	cytoskeleton-IEA;membrane-IEA;integral component of membrane-IEA	2	GO:0005856;GO:0016021	cytoskeleton;integral component of membrane	-	-	IPR000535;IPR013783;IPR036865;IPR000535;IPR036865;IPR008962	DOMAIN;HOMOLOGOUS_SUPERFAMILY;HOMOLOGOUS_SUPERFAMILY;HOMOLOGOUS_SUPERFAMILY;DOMAIN;HOMOLOGOUS_SUPERFAMILY;HOMOLOGOUS_SUPERFAMILY	Major sperm protein (MSP) domain;Immunoglobulin-like fold;CRAL-TRIO lipid binding domain superfamily;CRAL-TRIO lipid binding domain superfamily;Major sperm protein (MSP) domain;CRAL-TRIO lipid binding domain superfamily;PapD-like superfamily	PF00635 (PFAM);G3DSA:2.60.40.10 (GENE3D);G3DSA:3.40.525.10 (GENE3D);PTHR46384 (PANTHER);PS50202 (PROSITE_PROFILES);SSF52087 (SUPERFAMILY);SSF49354 (SUPERFAMILY)	;
MSTRG.13.1	IBR domain protein	MAEEYDDDFQYNTDSGSELDDEAVSDDDGIAMEQEDSSREVLKETPNLDAKVMTLDDLAREMAEIIDEVSAILRIGRGHCRILLHKFNWNKESLLERYYENPDTDAFLRKAQVLPRKPAPPPTSSVGECDICCNTALLGGLDCHHWACSCCWQMYLNTKIMNDATSEIQCIFNGCQLLIQDEKVMQYIQSEAVRNAYQRLKINSFVEGNRLLRWCPGLDCGKALKVEVGYSEPRPVVCACSMRFCFGCAHEWHEPVNCRLLKLWLKKCSDDSETSNWINANTKECPKCQVTIEKDGGCNHMVCKNTACRMEFCWICLGPWEPHGSSWYNCNRYDDSRAKQARDAQELSRANLQRYLHYYNRFMNHQQSLKLENKLYATVKGKMEQMQLQSMSWIEVQFL…	497	20	0	0.867	DICVIV_00481;ari-1.1;WR25_18057;ari-1.1;ANCCEY_12322;ari-1.1;ari-1.1;ANCCEY_12322;WR25_18057;ari-1.1;NECAME_14912;ari-1.1;ANCCEY_12322;NBR_LOCUS20804;ari-1.1;ari-1.1;ACOC_LOCUS14;OESDEN_09710;TELCIR_00874;WR25_18057;Cre-ari-1;WR25_18057;ari-1.1;PRIPAC_47925;ACOC_LOCUS14;ari-1.1;ari-1.1;CAEBREN_30373;FL83_16174;PRIPAC_47925;WR25_18057;Cnig_chr_I.g2801;FL83_16174;CAEBREN_30373;DICVIV_00481;NECAME_1…	GO:0061630-IBA;GO:0005737-IDA;GO:0005737-IBA;GO:0046872-IEA;GO:0000151-IBA;GO:0000209-IBA;GO:0016740-IEA;GO:0031624-IBA;GO:0016567-IEA;GO:0004842-IEA;GO:0005634-IDA;GO:0005634-IBA;GO:0006511-IBA;GO:0032436-IBA	ubiquitin protein ligase activity-IBA;cytoplasm-IDA;cytoplasm-IBA;metal ion binding-IEA;ubiquitin ligase complex-IBA;protein polyubiquitination-IBA;transferase activity-IEA;ubiquitin conjugating enzyme binding-IBA;protein ubiquitination-IEA;ubiquitin-protein transferase activity-IEA;nucleus-IDA;nucleus-IBA;ubiquitin-dependent protein catabolic process-IBA;positive regulation of proteasomal ubiqui…	8	GO:0000151;GO:0000209;GO:0005634;GO:0005737;GO:0031624;GO:0032436;GO:0046872;GO:0061630	ubiquitin ligase complex;protein polyubiquitination;nucleus;cytoplasm;ubiquitin conjugating enzyme binding;positive regulation of proteasomal ubiquitin-dependent protein catabolic process;metal ion binding;ubiquitin protein ligase activity	-	-	IPR002867;IPR013083;IPR031127	DOMAIN;DOMAIN;HOMOLOGOUS_SUPERFAMILY;HOMOLOGOUS_SUPERFAMILY;HOMOLOGOUS_SUPERFAMILY;FAMILY;FAMILY;FAMILY;FAMILY;FAMILY;FAMILY	IBR domain;IBR domain;Zinc finger, RING/FYVE/PHD-type;Zinc finger, RING/FYVE/PHD-type;Zinc finger, RING/FYVE/PHD-type;E3 ubiquitin ligase RBR family;E3 ubiquitin ligase RBR family;E3 ubiquitin ligase RBR family;E3 ubiquitin ligase RBR family;E3 ubiquitin ligase RBR family;E3 ubiquitin ligase RBR family	PF01485 (PFAM);G3DSA:1.20.120.1750 (GENE3D);G3DSA:3.30.40.10 (GENE3D);mobidb-lite (MOBIDB_LITE);mobidb-lite (MOBIDB_LITE);PTHR11685 (PANTHER);PTHR11685:SF245 (PANTHER);PS51873 (PROSITE_PROFILES);SSF57850 (SUPERFAMILY);SSF57850 (SUPERFAMILY);SSF57850 (SUPERFAMILY)	;ubiquitin-protein transferase activity/protein ubiquitination;
MSTRG.13.2	IBR domain protein	MAEEYDDDFQYNTDSGSELDDELPIAVSDTGCGCFWDVCLHLNSRLFMSGIMKTESCCSSNASGRDKVGSDEFSSVVDSSYQNAVSDDDGIAMEQEDSSREVLKETPNLDAKVMTLDDLAREMAEIIDEVSAILRIGRGHCRILLHKFNWNKESLLERYYENPDTDAFLRKAQVLPRKPAPPPTSSVGECDICCNTALLGGLDCHHWACSCCWQMYLNTKIMNDATSEIQCIFNGCQLLIQDEKVMQYIQSEAVRNAYQRLKINSFVEGNRLLRWCPGLDCGKALKVEVGYSEPRPVVCACSMRFCFGCAHEWHEPVNCRLLKLWLKKCSDDSETSNWINANTKECPKCQVTIEKDGGCNHMVCKNTACRMEFCWICLGPWEPHGSSWYNCNRYDDSRA…	558	20	0	0.859	DICVIV_00481;ari-1.1;WR25_18057;ari-1.1;ANCCEY_12322;ari-1.1;ari-1.1;ANCCEY_12322;WR25_18057;ari-1.1;NECAME_14912;ari-1.1;ANCCEY_12322;NBR_LOCUS20804;ari-1.1;ari-1.1;ACOC_LOCUS14;OESDEN_09710;TELCIR_00874;WR25_18057;Cre-ari-1;WR25_18057;ari-1.1;PRIPAC_47925;ACOC_LOCUS14;ari-1.1;ari-1.1;CAEBREN_30373;FL83_16174;PRIPAC_47925;WR25_18057;Cnig_chr_I.g2801;FL83_16174;CAEBREN_30373;DICVIV_00481;NECAME_1…	GO:0061630-IBA;GO:0005737-IDA;GO:0005737-IBA;GO:0046872-IEA;GO:0000151-IBA;GO:0000209-IBA;GO:0016740-IEA;GO:0031624-IBA;GO:0016567-IEA;GO:0004842-IEA;GO:0005634-IDA;GO:0005634-IBA;GO:0006511-IBA;GO:0032436-IBA	ubiquitin protein ligase activity-IBA;cytoplasm-IDA;cytoplasm-IBA;metal ion binding-IEA;ubiquitin ligase complex-IBA;protein polyubiquitination-IBA;transferase activity-IEA;ubiquitin conjugating enzyme binding-IBA;protein ubiquitination-IEA;ubiquitin-protein transferase activity-IEA;nucleus-IDA;nucleus-IBA;ubiquitin-dependent protein catabolic process-IBA;positive regulation of proteasomal ubiqui…	8	GO:0000151;GO:0000209;GO:0005634;GO:0005737;GO:0031624;GO:0032436;GO:0046872;GO:0061630	ubiquitin ligase complex;protein polyubiquitination;nucleus;cytoplasm;ubiquitin conjugating enzyme binding;positive regulation of proteasomal ubiquitin-dependent protein catabolic process;metal ion binding;ubiquitin protein ligase activity	-	-	IPR013083;IPR002867;IPR031127	HOMOLOGOUS_SUPERFAMILY;DOMAIN;DOMAIN;DOMAIN;DOMAIN;FAMILY;FAMILY;FAMILY;FAMILY;FAMILY;FAMILY	Zinc finger, RING/FYVE/PHD-type;IBR domain;IBR domain;IBR domain;IBR domain;E3 ubiquitin ligase RBR family;E3 ubiquitin ligase RBR family;E3 ubiquitin ligase RBR family;E3 ubiquitin ligase RBR family;E3 ubiquitin ligase RBR family;E3 ubiquitin ligase RBR family	G3DSA:3.30.40.10 (GENE3D);PF01485 (PFAM);G3DSA:1.20.120.1750 (GENE3D);mobidb-lite (MOBIDB_LITE);mobidb-lite (MOBIDB_LITE);PTHR11685 (PANTHER);PTHR11685:SF245 (PANTHER);PS51873 (PROSITE_PROFILES);SSF57850 (SUPERFAMILY);SSF57850 (SUPERFAMILY);SSF57850 (SUPERFAMILY)	;ubiquitin-protein transferase activity/protein ubiquitination;
transcript_ACOC_0000001301-mRNA-1	IBR domain protein	MTLDDLAREMAEIIDEVSAILRIGRGHCRILLHKFNWNKESLLERYYENPDTDAFLRKAQVLPRKPAPPPTSSVGECDICCNTALLGGLDCHHWACSCCWQMYLNTKVLSHMKFNAFSMDVMQYIQSEAVRNRLLRWCPGLDCGKALKVGYSEPRPVVCACSMRFCFGCAHEWHEPVNCRLLKLWLKKCSDDSETSNWINANTKECPKCQVTIEKDGGCNHMVCKNTACRMEFCWICLGPWEPHGSSWYNCNRYDDSRAKQARDAQELSRANLQRYLHYYNRFMNHQQSLKLENKLYATVKGKMEQMQLQSMSWIEVQFLRKAVDVLSECRRTLMYTYAFAYYLKRDNHAEIFEGNQRDLEMATEQLSQFLERDLENENLITLKQKVQDNYRYVDQRRL…	418	20	0	0.8343	DICVIV_00481;ari-1.1;WR25_18057;ari-1.1;ANCCEY_12322;ari-1.1;ari-1.1;ANCCEY_12322;WR25_18057;ari-1.1;NECAME_14912;ari-1.1;ANCCEY_12322;NBR_LOCUS20804;ari-1.1;ari-1.1;ACOC_LOCUS14;OESDEN_09710;TELCIR_00874;WR25_18057;Cre-ari-1;WR25_18057;ari-1.1;PRIPAC_47925;ACOC_LOCUS14;ari-1.1;ari-1.1;CAEBREN_30373;FL83_16174;PRIPAC_47925;WR25_18057;Cnig_chr_I.g2801;FL83_16174;CAEBREN_30373;DICVIV_00481;NECAME_1…	GO:0061630-IBA;GO:0005737-IDA;GO:0005737-IBA;GO:0046872-IEA;GO:0000151-IBA;GO:0000209-IBA;GO:0016740-IEA;GO:0031624-IBA;GO:0016567-IEA;GO:0004842-IEA;GO:0005634-IDA;GO:0005634-IBA;GO:0006511-IBA;GO:0032436-IBA	ubiquitin protein ligase activity-IBA;cytoplasm-IDA;cytoplasm-IBA;metal ion binding-IEA;ubiquitin ligase complex-IBA;protein polyubiquitination-IBA;transferase activity-IEA;ubiquitin conjugating enzyme binding-IBA;protein ubiquitination-IEA;ubiquitin-protein transferase activity-IEA;nucleus-IDA;nucleus-IBA;ubiquitin-dependent protein catabolic process-IBA;positive regulation of proteasomal ubiqui…	8	GO:0000151;GO:0000209;GO:0005634;GO:0005737;GO:0031624;GO:0032436;GO:0046872;GO:0061630	ubiquitin ligase complex;protein polyubiquitination;nucleus;cytoplasm;ubiquitin conjugating enzyme binding;positive regulation of proteasomal ubiquitin-dependent protein catabolic process;metal ion binding;ubiquitin protein ligase activity	-	-	IPR002867;IPR031127	HOMOLOGOUS_SUPERFAMILY;DOMAIN;DOMAIN;FAMILY;FAMILY;FAMILY;FAMILY	Homeobox-like domain superfamily;IBR domain;IBR domain;E3 ubiquitin ligase RBR family;E3 ubiquitin ligase RBR family;E3 ubiquitin ligase RBR family;E3 ubiquitin ligase RBR family	G3DSA:1.20.120.1750 (GENE3D);PF01485 (PFAM);PTHR11685:SF208 (PANTHER);PTHR11685 (PANTHER);PS51873 (PROSITE_PROFILES);SSF57850 (SUPERFAMILY);SSF57850 (SUPERFAMILY)	;ubiquitin-protein transferase activity/protein ubiquitination;
MSTRG.14.1	putative U4/U6 small nuclear ribonucleoprotein Prp31	MSLAEELMADFEEDDADDIEQAIEVVNGEEDIEEASEFAPVKSDYNSVYDVAKMTLTDEYRELISTLNSELERTDEVHVTAPLESDPQYRLIVRLSHLAADLDGEINVIHKFVRDKYEKRFPELETLVPNPLEYLAAVKLLGNEINTKGQNKELLGQILAPATCIVVSVTASTTQGKSLEADELHAVREACDLAEKLHTDRISMYRLVELRMALIAPNLVHLLGAATTALLVSQAGGLAPLSRMPACNIQVLGRQKKSLAGFSSTTALPHAGFVYFHPLVQSMPPDLKSKAAKILASKCTLAARVDSLHESPNGAIGIALLEEVRNKMEKLMEPPPVKANKALPKPLDKASKKRGGRRVRKMKERMGMTDLRKSANRMNFGELQEDVLQDHMGFDLGQV…	495	20	0	0.8884	NOO_LOCUS8055;LOAG_08730;DICVIV_00482;DME_LOCUS7324;WBA_LOCUS3292;ANCCAN_20247;ANCDUO_09152;WR25_08416;OESDEN_15108;WBA_LOCUS3292;Acey_s0296.g1678;NLS_LOCUS2611;DME_LOCUS7324;ANCDUO_09152;NLS_LOCUS2611;HPLM_LOCUS422;TCLT_LOCUS878;LOAG_08730;BPAG_LOCUS1842;NECAME_14913;NOO_LOCUS8055;DICVIV_00482;bma-prp-31;Bma-prp-31;HPLM_LOCUS422;Acey_s0296.g1678;NAV_LOCUS4783;NECAME_14913;NAV_LOCUS4783;Bma-prp-3…	GO:0000244-IEA;GO:0000398-IEA;GO:0046540-IEA	spliceosomal tri-snRNP complex assembly-IEA;mRNA splicing, via spliceosome-IEA;U4/U6 x U5 tri-snRNP complex-IEA	2	GO:0000244;GO:0046540	spliceosomal tri-snRNP complex assembly;U4/U6 x U5 tri-snRNP complex	-	-	IPR029012;IPR002687;IPR019175;IPR042239;IPR027105;IPR002687;IPR036070	HOMOLOGOUS_SUPERFAMILY;DOMAIN;DOMAIN;DOMAIN;HOMOLOGOUS_SUPERFAMILY;HOMOLOGOUS_SUPERFAMILY;HOMOLOGOUS_SUPERFAMILY;FAMILY;DOMAIN;HOMOLOGOUS_SUPERFAMILY	Helix hairpin bin domain superfamily;Nop domain;Nop domain;Prp31 C-terminal;Nop, C-terminal domain;Nop, C-terminal domain;Nop, C-terminal domain;U4/U6 small nuclear ribonucleoprotein Prp31;Nop domain;Nop domain superfamily	G3DSA:1.10.287.660 (GENE3D);PF01798 (PFAM);G3DSA:1.10.150.460 (GENE3D);PF09785 (PFAM);G3DSA:1.10.246.90 (GENE3D);mobidb-lite (MOBIDB_LITE);PTHR13904:SF0 (PANTHER);PTHR13904 (PANTHER);PS51358 (PROSITE_PROFILES);SSF89124 (SUPERFAMILY)	;spliceosomal tri-snRNP complex assembly/U4/U6 x U5 tri-snRNP complex/mRNA splicing, via spliceosome;
transcript_ACOC_0000001401-mRNA-1	putative U4/U6 small nuclear ribonucleoprotein Prp31	MSLAEELMADFEEDDADDIEQAIEVVNGEEDIEEASEFAPVKSDYNSVYDVAKMTLTDEYRELISTLNSELERTDEVHVTAPLESDPQYRLIVRLSHLAADLDGEINVIHKFVRDKYEKRFPELETLVPNPLEYLAAVKLLGNEINTKGQNKAKVQELLGQILAPATCIVVSVTASTTQGKSLEADELHAVREACDLAEKLHTDRISMYRLVELRMALIAPNLVHLLGAATTALLVSQAGGLAPLSRMPACNIQVLGRQKKSLAGFSSTTALPHAGFVYFHPLVQSMPPDLKSKAAKILASKCTLAARVDSLHESPNGAIGIALLEEVRNKMEKLMEPPPVKANKALPKPLDKASKKRGGRRVRKMKERMGMTDLRKSANRMNFGELQEDVLQDHMGFD…	499	20	0	0.882	NOO_LOCUS8055;LOAG_08730;DICVIV_00482;DME_LOCUS7324;WBA_LOCUS3292;ANCCAN_20247;ANCDUO_09152;WR25_08416;OESDEN_15108;WBA_LOCUS3292;Acey_s0296.g1678;NLS_LOCUS2611;DME_LOCUS7324;ANCDUO_09152;NLS_LOCUS2611;HPLM_LOCUS422;TCLT_LOCUS878;LOAG_08730;BPAG_LOCUS1842;NECAME_14913;NOO_LOCUS8055;DICVIV_00482;bma-prp-31;Bma-prp-31;HPLM_LOCUS422;Acey_s0296.g1678;NAV_LOCUS4783;NECAME_14913;NAV_LOCUS4783;Bma-prp-3…	GO:0000244-IEA;GO:0000398-IEA;GO:0046540-IEA	spliceosomal tri-snRNP complex assembly-IEA;mRNA splicing, via spliceosome-IEA;U4/U6 x U5 tri-snRNP complex-IEA	2	GO:0000244;GO:0046540	spliceosomal tri-snRNP complex assembly;U4/U6 x U5 tri-snRNP complex	-	-	IPR042239;IPR019175;IPR002687;IPR029012;IPR027105;IPR002687;IPR036070	HOMOLOGOUS_SUPERFAMILY;DOMAIN;DOMAIN;HOMOLOGOUS_SUPERFAMILY;HOMOLOGOUS_SUPERFAMILY;HOMOLOGOUS_SUPERFAMILY;HOMOLOGOUS_SUPERFAMILY;FAMILY;DOMAIN;HOMOLOGOUS_SUPERFAMILY	Nop, C-terminal domain;Prp31 C-terminal;Nop domain;Helix hairpin bin domain superfamily;Helix hairpin bin domain superfamily;Helix hairpin bin domain superfamily;Helix hairpin bin domain superfamily;U4/U6 small nuclear ribonucleoprotein Prp31;Nop domain;Nop domain superfamily	G3DSA:1.10.246.90 (GENE3D);PF09785 (PFAM);PF01798 (PFAM);G3DSA:1.10.287.660 (GENE3D);G3DSA:1.10.150.460 (GENE3D);mobidb-lite (MOBIDB_LITE);PTHR13904:SF0 (PANTHER);PTHR13904 (PANTHER);PS51358 (PROSITE_PROFILES);SSF89124 (SUPERFAMILY)	;spliceosomal tri-snRNP complex assembly/U4/U6 x U5 tri-snRNP complex/mRNA splicing, via spliceosome;
MSTRG.16.1	peptidase family C50	MIKILHYQLVVDMTQVDKRREVKDSPALCGQFGCTWQPGGIGSFPGRRVQMSEQRPTIDKRVLYNSCWEYLDSYIRDIVAIQEEVFVTMKSEFTYENVCEPTSSPKYLAVISKFASVSSSREDIYKSLIKSYMLWRDKLEPKVRESTKKHTYAELPLRLAACFFLNGDYYKALLCLRHSIILEPRSLLPRILALRWSVFLGEWEMAEMALAFEKTKEGKAPQKEATDDYVASHLILVKGLVKCYVEFNRDHKSRSISGSTLLKTAHSVNADSRTTFLTFEAQSLANWMCSHIPKVPANFSLDNVEPLDTFNCLHRAVAKSESVVKNRIPGIHKESEPLDFMKVSSNAIDFLKACASYAESCELRREYCAELLNVGMVHDAAFHSQLGLWCALKIGVLFR…	1672	20	0	0.7427	ANCDUO_04162;ACOC_LOCUS17;GCK72_002117;GCK72_002117;GCK72_002117;ANCDUO_04162;ANCCAN_09766;ANCDUO_04162;Cre-sep-1;ANCCAN_09766;ANCCEY_11725;Cnig_chr_I.g903;DICVIV_00485;HPLM_LOCUS7209;ACOC_LOCUS17;DICVIV_00485;ANCCEY_11725;DICVIV_00485;HPLM_LOCUS7209;ANCCEY_11725;Cnig_chr_I.g903;OESDEN_00824;HPLM_LOCUS7209;Cre-sep-1;Cre-sep-1;Cnig_chr_I.g903;ANCCAN_09766;ACOC_LOCUS17;OESDEN_00824;Acey_s0421.g1158…	GO:0005085-IEA;GO:0006508-IEA;GO:0004197-IEA;GO:0005634-IEA	guanyl-nucleotide exchange factor activity-IEA;proteolysis-IEA;cysteine-type endopeptidase activity-IEA;nucleus-IEA	4	GO:0004197;GO:0005085;GO:0005634;GO:0006508	cysteine-type endopeptidase activity;guanyl-nucleotide exchange factor activity;nucleus;proteolysis	EC:3.4.22	Acting on peptide bonds (peptidases)	IPR035899;IPR000219;IPR005314;IPR030397;IPR000219;IPR000219;IPR035899	HOMOLOGOUS_SUPERFAMILY;DOMAIN;DOMAIN;FAMILY;DOMAIN;DOMAIN;DOMAIN;HOMOLOGOUS_SUPERFAMILY	Dbl homology (DH) domain superfamily;Dbl homology (DH) domain;Dbl homology (DH) domain;Peptidase C50, separase;SEPARIN core domain;Dbl homology (DH) domain;Dbl homology (DH) domain;Dbl homology (DH) domain superfamily	G3DSA:1.20.900.10 (GENE3D);PF00621 (PFAM);PF03568 (PFAM);PTHR12792 (PANTHER);PS51700 (PROSITE_PROFILES);PS50010 (PROSITE_PROFILES);cd00160 (CDD);SSF48065 (SUPERFAMILY)	;guanyl-nucleotide exchange factor activity;cysteine-type endopeptidase activity/nucleus/proteolysis;cysteine-type endopeptidase activity/proteolysis;guanyl-nucleotide exchange factor activity;guanyl-nucleotide exchange factor activity;
transcript_ACOC_0000001601-mRNA-1	peptidase family C50	MKTYFCSDASLPANNRLNERRFAGRVVSLVESSHRSTKGGKLKTVQRCAASSDALGSREASVFVTMKSEFTYENVCEPTSSPKYLAVISKFASVSSSREDIYKSLIKSYMLWRDKLEPKVRESTKKHTYAELPLRLAACFFLNGDYYKALLCLRHSIILEPRSLLPRILALRWSVFLGEWEMAEMALAFEKTKEGKAPQKEATDDYVASHLILVKGLVKCYVEFNRDHKSRSISGSTLLKTAHSVNADSRTTFLTFEAQSLANWMCSHIPKVPANFSLDNVEPLDTFNCLHRAVAKSESVVKNRIPGIHKESEPLDFMKRPPSSMCETFAMCVVRWLRKLEDVSWNRENRALKSLRERIIADALKICSYSSIRTISYRLAISHLERLQSLRRYPRYQWM…	1063	20	0	0.7084	ANCDUO_04162;ACOC_LOCUS17;FL82_12653;ANCDUO_04162;FL82_12653;ANCCAN_09766;ANCDUO_04162;Cre-sep-1;ANCCAN_09766;ANCCEY_11725;DICVIV_00485;HPLM_LOCUS7209;ACOC_LOCUS17;DICVIV_00485;ANCCEY_11725;DICVIV_00485;HPLM_LOCUS7209;ANCCEY_11725;FL81_13095;FL81_13095;OESDEN_00824;HPLM_LOCUS7209;Cre-sep-1;Cre-sep-1;ANCCAN_09766;FL81_13095;FL82_12653;ACOC_LOCUS17;OESDEN_00824;Acey_s0421.g1158;Acey_s0421.g1158;HPB…	GO:0005085-IEA;GO:0006508-IEA;GO:0004197-IEA;GO:0005634-IEA	guanyl-nucleotide exchange factor activity-IEA;proteolysis-IEA;cysteine-type endopeptidase activity-IEA;nucleus-IEA	4	GO:0004197;GO:0005085;GO:0005634;GO:0006508	cysteine-type endopeptidase activity;guanyl-nucleotide exchange factor activity;nucleus;proteolysis	EC:3.4.22	Acting on peptide bonds (peptidases)	IPR035899;IPR000219;IPR005314;IPR000219;IPR030397;IPR035899	HOMOLOGOUS_SUPERFAMILY;HOMOLOGOUS_SUPERFAMILY;DOMAIN;FAMILY;DOMAIN;DOMAIN;HOMOLOGOUS_SUPERFAMILY	Dbl homology (DH) domain superfamily;Dbl homology (DH) domain superfamily;Dbl homology (DH) domain;Peptidase C50, separase;Dbl homology (DH) domain;SEPARIN core domain;Dbl homology (DH) domain superfamily	G3DSA:1.20.900.10 (GENE3D);PF03568 (PFAM);PF00621 (PFAM);PTHR12792 (PANTHER);PS50010 (PROSITE_PROFILES);PS51700 (PROSITE_PROFILES);SSF48065 (SUPERFAMILY)	;guanyl-nucleotide exchange factor activity;cysteine-type endopeptidase activity/nucleus/proteolysis;guanyl-nucleotide exchange factor activity;cysteine-type endopeptidase activity/proteolysis;
transcript_ACOC_0000001701-mRNA-1	SYF2 splicing factor	MEDAAGFQNSGFSSTKPLDFNERFKKLHRLRQQSRKANHEQVVEEDRKAKLPANYEAKRTREQWELQEMEERKKADEEGIDYERLKALNTSADVAARIEMRKKRKKNPDQGFSSYEDMTLRQHSRLTTAIKPNSKSYKKMRDIVGEDQFYPTANTLIHGAHYPTSAAMEKLAEDVKGQAKRREQFHRRRLFDPDAPIDYINDKNMRFNKKLEKFYGQYTEDIKVLRVFNILMLGTQKHWVVPQSSVRLSSEQ	252	20	0	0.9131	syf-2;syf-2;syf-2;syf-2;syf-2;syf-2;syf-2;syf-2;syf-2;syf-2;syf-2;syf-2;syf-2;syf-2	GO:0008380-IEA;GO:0071014-IBA;GO:0005681-IEA;GO:0071013-IBA;GO:0006397-IEA;GO:0000974-IBA;GO:0005634-IEA	RNA splicing-IEA;post-mRNA release spliceosomal complex-IBA;spliceosomal complex-IEA;catalytic step 2 spliceosome-IBA;mRNA processing-IEA;Prp19 complex-IBA;nucleus-IEA	5	GO:0000974;GO:0006397;GO:0008380;GO:0071013;GO:0071014	Prp19 complex;mRNA processing;RNA splicing;catalytic step 2 spliceosome;post-mRNA release spliceosomal complex	-	-	IPR013260;IPR013260	FAMILY;FAMILY;FAMILY;FAMILY;FAMILY	mRNA splicing factor SYF2;mRNA splicing factor SYF2;mRNA splicing factor SYF2;mRNA splicing factor SYF2;mRNA splicing factor SYF2	PF08231 (PFAM);mobidb-lite (MOBIDB_LITE);mobidb-lite (MOBIDB_LITE);PTHR13264:SF5 (PANTHER);PTHR13264 (PANTHER)	;
MSTRG.17.1	SYF2 splicing factor	MEDAAGFQNSGFSSTKPLDFNERFKKLHRLRQQSRKANHEQVVEEDRKAKLPANYEAKRTREQWELQEMEERKKADEEGIDYERLKALNTSADVAARIEMRKKRKKNPDQGFSSYEDMTLRQHSRLTTAIKPNSKSYKKMRDIVGEDQFYPTANTLIHGAHYPTSAAMEKLAEDVKGQAKRREQFHRRRLFDPDAPIDYINDKNMRFNKKLEKFYGQYTEDIKEDLERGTAI	232	20	3.9e-165	0.9188	syf-2;syf-2;syf-2;syf-2;syf-2;syf-2;syf-2;syf-2;syf-2;syf-2;syf-2;syf-2;syf-2;syf-2	GO:0008380-IEA;GO:0071014-IBA;GO:0005681-IEA;GO:0071013-IBA;GO:0006397-IEA;GO:0000974-IBA;GO:0005634-IEA	RNA splicing-IEA;post-mRNA release spliceosomal complex-IBA;spliceosomal complex-IEA;catalytic step 2 spliceosome-IBA;mRNA processing-IEA;Prp19 complex-IBA;nucleus-IEA	5	GO:0000974;GO:0006397;GO:0008380;GO:0071013;GO:0071014	Prp19 complex;mRNA processing;RNA splicing;catalytic step 2 spliceosome;post-mRNA release spliceosomal complex	-	-	IPR013260;IPR013260	FAMILY;FAMILY;FAMILY;FAMILY;FAMILY	mRNA splicing factor SYF2;mRNA splicing factor SYF2;mRNA splicing factor SYF2;mRNA splicing factor SYF2;mRNA splicing factor SYF2	PF08231 (PFAM);mobidb-lite (MOBIDB_LITE);mobidb-lite (MOBIDB_LITE);PTHR13264 (PANTHER);PTHR13264:SF5 (PANTHER)	;
MSTRG.18.1	metal cation transporter, ZIP family	MNLNTLKLVLLSVMICSTLFAGLSPLKVLRYLRHSAARASSSKQHKHVSLILCLLTCFSGGVFLATCFLHLFPELVENVGKLDEVYDFYIDYPVAELLSCLGFFLLFFLEEVVIVAIPSLAHSHSHGKHIHAHDLGESSPLAAQDSTCCMIDSYVPAQSSSRNERPLEVHSTYTTDHVKGVTSDDENVDGHCQKHCPLTVHRVKKSTDHKEPQCTAVSDFSVYTTLAVAEPERCETNCEKVDEDPPILMKSSPHAHSHGVRSITFVLALSIHSVIEGIAFGVGDNASETTALFLSLLVHKLIVSFSVGLQLARTHAHQLHWVVASVFILALMSPLGAVVGMVVQSAAANSFSKDVAITILQGLAVGTFLYVTFFEVLLHERDNEHPNLLKLLVMLVGFS…	444	20	0	0.7681	zipt-2.4;Cni-F55F8.9;OESDEN_04932;NECAME_14534;ANCCAN_21584;zipt-2.4;CAEBREN_22155;HPLM_LOCUS18379;ANCCEY_13752;CRE_03832;zipt-2.4;Cni-F55F8.9;WR25_19339;WR25_19339;DICVIV_00488;HPLM_LOCUS18379;zipt-2.4;NECAME_14534;ANCCAN_21584;Acey_s0092.g2590;zipt-2.4;NBR_LOCUS12815;NBR_LOCUS12815;CRE_03832;DICVIV_00488;WR25_19339;HPLM_LOCUS18379;zipt-2.4;ANCCEY_13752;OESDEN_04932;CAEBREN_22155;ACOC_LOCUS19;Ac…	GO:0055085-IEA;GO:0046873-IEA;GO:0016020-IBA;GO:0016020-IEA;GO:0016021-IEA;GO:0030001-IEA;GO:0005385-IBA;GO:0071577-IBA;GO:0005886-IBA	transmembrane transport-IEA;metal ion transmembrane transporter activity-IEA;membrane-IBA;membrane-IEA;integral component of membrane-IEA;metal ion transport-IEA;zinc ion transmembrane transporter activity-IBA;zinc ion transmembrane transport-IBA;plasma membrane-IBA	4	GO:0005385;GO:0005886;GO:0016021;GO:0071577	zinc ion transmembrane transporter activity;plasma membrane;integral component of membrane;zinc ion transmembrane transport	-	-	IPR003689	FAMILY;FAMILY;FAMILY	Zinc/iron permease;Zinc/iron permease;Zinc/iron permease	PF02535 (PFAM);PTHR11040 (PANTHER);PTHR11040:SF143 (PANTHER)	metal ion transmembrane transporter activity/metal ion transport/membrane/transmembrane transport;
MSTRG.18.2	metal cation transporter, ZIP family	MNLNTLKLVLLSVMICSTLFAGLSPLKVLRYLRHSAARASSSKQHKHVSLILCLLTCFSGGVFLATCFLHLFPELVENVGKLDEVYDFYIDYPVAELLSCLGFFLLFFLEEVVIVAIPSLAHSHSHGKHIHAHDLGESSPLAAQDSTCCMIDSYVPAQSSSRNERPLEVHSTYTTDHVKGVTSDDENVDGHCQKHCPLTVHRVKKSTDHKEPQCTAVSDVYTTLAVAEPERCETNCEKVDEDPPILMKSSPHAHSHGVRSITFVLALSIHSVIEGIAFGVGDNASETTALFLSLLVHKLIVSFSVGLQLARTHAHQLHWVVASVFILALMSPLGAVVGMVVQSAAANSFSKDVAITILQGLAVGTFLYVTFFEVLLHERDNEHPNLLKLLVMLVGFSLI…	442	20	0	0.7682	zipt-2.4;Cni-F55F8.9;OESDEN_04932;NECAME_14534;ANCCAN_21584;zipt-2.4;CAEBREN_22155;HPLM_LOCUS18379;ANCCEY_13752;zipt-2.4;Cni-F55F8.9;WR25_19339;WR25_19339;DICVIV_00488;HPLM_LOCUS18379;zipt-2.4;NECAME_14534;ANCCAN_21584;Acey_s0092.g2590;zipt-2.4;NBR_LOCUS12815;NBR_LOCUS12815;DICVIV_00488;WR25_19339;HPLM_LOCUS18379;zipt-2.4;ANCCEY_13752;OESDEN_04932;CAEBREN_22155;ACOC_LOCUS19;Acey_s0092.g2590;WR25_…	GO:0055085-IEA;GO:0046873-IEA;GO:0016020-IBA;GO:0016020-IEA;GO:0016021-IEA;GO:0030001-IEA;GO:0005385-IBA;GO:0071577-IBA;GO:0005886-IBA	transmembrane transport-IEA;metal ion transmembrane transporter activity-IEA;membrane-IBA;membrane-IEA;integral component of membrane-IEA;metal ion transport-IEA;zinc ion transmembrane transporter activity-IBA;zinc ion transmembrane transport-IBA;plasma membrane-IBA	4	GO:0005385;GO:0005886;GO:0016021;GO:0071577	zinc ion transmembrane transporter activity;plasma membrane;integral component of membrane;zinc ion transmembrane transport	-	-	IPR003689	FAMILY;FAMILY;FAMILY;FAMILY;FAMILY	Zinc/iron permease;Zinc/iron permease;Zinc/iron permease;Zinc/iron permease;Zinc/iron permease	PF02535 (PFAM);PTHR11040:SF143 (PANTHER);PTHR11040 (PANTHER);PTHR11040:SF143 (PANTHER);PTHR11040 (PANTHER)	metal ion transmembrane transporter activity/metal ion transport/membrane/transmembrane transport;
transcript_ACOC_0000001801-mRNA-1	metal cation transporter, ZIP family	MNLNTLKLVLLSVMICSTLFAGLSPLKVLRYLRHSAARASSSKQHKHVSLILCLLTCFSGGWLHSWLPLVLSSLHGTSGVFLATCFLHLFPELVENVGKLDEVYDFYIDYPVAELLSCLGFFLLFFLEEHPSVRQIHKVTVFRRHYFHALNSVEVHSTYTTDHVKGVTSDDENVDGHCQKHCPLTVHRVKKSTDHKEPQCTAVSDVYTTLAVAEPERCETNCEKVDEDPPILMKSSPHAHSHGVRSITFVLALSIHSVIEGIAFGVGDNASETTALFLSLLVHKLIVSFSVGLQLARTHAHQLHWVVASVFILALMSPLGAVVGMVVQSAAANSFSKDVAITILQGLAVGTFLYVTFFEVLLHERDNEHPNLLKLLVMLVGFSLIGLLRLIDNHDHSDF…	428	20	0	0.6957	zipt-2.4;Cni-F55F8.9;OESDEN_04932;NECAME_14534;ANCCAN_21584;zipt-2.4;CAEBREN_22155;HPLM_LOCUS18379;ANCCEY_13752;CRE_03832;zipt-2.4;Cni-F55F8.9;WR25_19339;WR25_19339;DICVIV_00488;HPLM_LOCUS18379;zipt-2.4;NECAME_14534;ANCCAN_21584;Acey_s0092.g2590;zipt-2.4;NBR_LOCUS12815;NBR_LOCUS12815;CRE_03832;DICVIV_00488;WR25_19339;HPLM_LOCUS18379;zipt-2.4;ANCCEY_13752;OESDEN_04932;CAEBREN_22155;ACOC_LOCUS19;Ac…	GO:0055085-IEA;GO:0046873-IEA;GO:0016020-IBA;GO:0016020-IEA;GO:0016021-IEA;GO:0030001-IEA;GO:0005385-IBA;GO:0071577-IBA;GO:0005886-IBA	transmembrane transport-IEA;metal ion transmembrane transporter activity-IEA;membrane-IBA;membrane-IEA;integral component of membrane-IEA;metal ion transport-IEA;zinc ion transmembrane transporter activity-IBA;zinc ion transmembrane transport-IBA;plasma membrane-IBA	4	GO:0016021;GO:0030001;GO:0046873;GO:0055085	integral component of membrane;metal ion transport;metal ion transmembrane transporter activity;transmembrane transport	-	-	IPR003689	FAMILY;FAMILY;FAMILY;FAMILY;FAMILY	Zinc/iron permease;Zinc/iron permease;Zinc/iron permease;Zinc/iron permease;Zinc/iron permease	PF02535 (PFAM);PTHR11040:SF143 (PANTHER);PTHR11040 (PANTHER);PTHR11040:SF143 (PANTHER);PTHR11040 (PANTHER)	metal ion transmembrane transporter activity/metal ion transport/membrane/transmembrane transport;
MSTRG.19.1	putative adenine phosphoribosyltransferase	MPDWKQMSLSEVRAKVDQHIRSIRDFPKKGINFRDIMPLFSHPSLVEQLCCAIADHLRTEVGKIDAIAALEARGFLFGPIVAIRLGIPFIPIRKKGKLPGDCIQASYVKEYGEDIIEIQSNVVSHGWRIVILDDLLATGGTMKAAVEVISKAGAIVKEVFVIVELTPLHGRDKILEVPVTSLISYNEA	188	20	4e-121	0.8356	ANCCEY_13753;CGOC_LOCUS3078;DICVIV_00489;ANCDUO_16766;NECAME_14533;Cni-T19B4.3;DICVIV_00489;ANCCAN_21585;CAEBREN_02611;CRE_03628;FL81_14450;L596_008056;CBG14916;T19B4.3;CBG14916;NBR_LOCUS12814;OESDEN_04934;CBG14916;TELCIR_00869;ANCCEY_13753;T19B4.3;T19B4.3;CAEBREN_02611;T19B4.3;NBR_LOCUS12814;DICVIV_00489;TELCIR_00869;CRE_03628;FL81_14450;T19B4.3;T19B4.3;CAEBREN_02611;CBG14916;Cni-T19B4.3;NBR_LOC…	GO:0016757-IEA;GO:0044209-IBA;GO:0044209-IEA;GO:0005737-IBA;GO:0005737-IEA;GO:0016208-IBA;GO:0003999-IBA;GO:0003999-IEA;GO:0006168-IBA;GO:0006168-IEA;GO:0009116-IEA;GO:0006166-IEA;GO:0016740-IEA;GO:0002055-IBA	transferase activity, transferring glycosyl groups-IEA;AMP salvage-IBA;AMP salvage-IEA;cytoplasm-IBA;cytoplasm-IEA;AMP binding-IBA;adenine phosphoribosyltransferase activity-IBA;adenine phosphoribosyltransferase activity-IEA;adenine salvage-IBA;adenine salvage-IEA;nucleoside metabolic process-IEA;purine ribonucleoside salvage-IEA;transferase activity-IEA;adenine binding-IBA	7	GO:0002055;GO:0003999;GO:0005737;GO:0006166;GO:0006168;GO:0016208;GO:0044209	adenine binding;adenine phosphoribosyltransferase activity;cytoplasm;purine ribonucleoside salvage;adenine salvage;AMP binding;AMP salvage	EC:2.4.2.7	Adenine phosphoribosyltransferase	IPR000836;IPR029057;IPR005764;IPR000836;IPR029057	DOMAIN;HOMOLOGOUS_SUPERFAMILY;HOMOLOGOUS_SUPERFAMILY;FAMILY;DOMAIN;HOMOLOGOUS_SUPERFAMILY	Phosphoribosyltransferase domain;Phosphoribosyltransferase-like;Phosphoribosyltransferase-like;Adenine phosphoribosyl transferase;Phosphoribosyltransferase domain;Phosphoribosyltransferase-like	PF00156 (PFAM);G3DSA:3.40.50.2020 (GENE3D);PTHR32315 (PANTHER);MF_00004 (HAMAP);cd06223 (CDD);SSF53271 (SUPERFAMILY)	nucleoside metabolic process;adenine salvage/adenine phosphoribosyltransferase activity/cytoplasm;nucleoside metabolic process;
transcript_ACOC_0000001901-mRNA-1	putative adenine phosphoribosyltransferase	MPLFSHPSLVEQLCCAIADHLRTEVGKIDAIAALEARGFLFGPIVAIRLGIPFIPIRKKGKLPGDCIQASYVKEYGEDIIEIQSNVVSHGWRIVILDDLLATGGTMKAAVEVISKAGAIVKEVFVIVELTPLHGRDKILEVPVTSLISYNEA	152	20	7e-106	0.8426	SBAD_LOCUS4453;ANCCEY_13753;CGOC_LOCUS3078;DICVIV_00489;ANCDUO_16766;NECAME_14533;Cni-T19B4.3;DICVIV_00489;ANCCAN_21585;CAEBREN_02611;CRE_03628;FL81_14450;CBG14916;T19B4.3;CBG14916;NBR_LOCUS12814;OESDEN_04934;CBG14916;TELCIR_00869;ANCCEY_13753;T19B4.3;T19B4.3;CAEBREN_02611;T19B4.3;NBR_LOCUS12814;DICVIV_00489;TELCIR_00869;CRE_03628;FL81_14450;T19B4.3;T19B4.3;CAEBREN_02611;CBG14916;Cni-T19B4.3;SBAD…	GO:0016757-IEA;GO:0044209-IBA;GO:0044209-IEA;GO:0005737-IBA;GO:0005737-IEA;GO:0016208-IBA;GO:0003999-IBA;GO:0003999-IEA;GO:0006168-IBA;GO:0006168-IEA;GO:0009116-IEA;GO:0006166-IEA;GO:0016740-IEA;GO:0002055-IBA	transferase activity, transferring glycosyl groups-IEA;AMP salvage-IBA;AMP salvage-IEA;cytoplasm-IBA;cytoplasm-IEA;AMP binding-IBA;adenine phosphoribosyltransferase activity-IBA;adenine phosphoribosyltransferase activity-IEA;adenine salvage-IBA;adenine salvage-IEA;nucleoside metabolic process-IEA;purine ribonucleoside salvage-IEA;transferase activity-IEA;adenine binding-IBA	7	GO:0002055;GO:0003999;GO:0005737;GO:0006166;GO:0006168;GO:0016208;GO:0044209	adenine binding;adenine phosphoribosyltransferase activity;cytoplasm;purine ribonucleoside salvage;adenine salvage;AMP binding;AMP salvage	EC:2.4.2.7	Adenine phosphoribosyltransferase	IPR000836;IPR029057;IPR000836;IPR029057	DOMAIN;HOMOLOGOUS_SUPERFAMILY;HOMOLOGOUS_SUPERFAMILY;DOMAIN;HOMOLOGOUS_SUPERFAMILY	Phosphoribosyltransferase domain;Phosphoribosyltransferase-like;Phosphoribosyltransferase-like;Phosphoribosyltransferase domain;Phosphoribosyltransferase-like	PF00156 (PFAM);G3DSA:3.40.50.2020 (GENE3D);PTHR32315 (PANTHER);cd06223 (CDD);SSF53271 (SUPERFAMILY)	nucleoside metabolic process;nucleoside metabolic process;
MSTRG.20.1	fibronectin type III domain protein	MNAQRPNADLWIDHPGGNHIRGGPSDYMMNGIGTSAVDMKSLTGPEVVESPPPRYHTMQGQGTLSRSYHHSESSLDGQRQRTPQVVYTGSGRHQPIAKVELGDSPYGSTSALTTTPPVPMQAPPPGPPSMIDGYRTLRGGANASSQSQGPFRSFTQLSATPPLPPNGGQASSQHQTRPVVVAAGGRQLPVGRATAQPRVNVTNIYSSYASCSSDIEAEKKQVQSEVVPTVNPAAVRPSNSTEELNAQMENLDTMIDDLQALQHEFGVVS	269	20	6.7e-140	0.7403	unc-40;DICVIV_00490;unc-40;unc-40;WR25_04368;unc-40;HPBE_LOCUS5266;Acey_s0092.g2592;ANCCAN_21586;unc-40;WR25_04368;unc-40;unc-40;unc-40;unc-40;unc-40;Acey_s0092.g2592;WR25_04368;WR25_04368;ANCCAN_21586;unc-40;unc-40;unc-40;unc-40;unc-40;unc-40;Acey_s0092.g2592;unc-40;unc-40;unc-40;unc-40;unc-40;unc-40;unc-40;HPBE_LOCUS5266;Acey_s0092.g2592;unc-40;unc-40;unc-40;WR25_04368;ANCDUO_16767;unc-40;unc-4…	GO:0001764-IMP;GO:0044295-IDA;GO:0097402-IGI;GO:0097402-IMP;GO:0016020-IDA;GO:0016020-IEA;GO:0016021-IEA;GO:0051965-IMP;GO:0040017-IMP;GO:0038007-IMP;GO:0038007-IGI;GO:0031175-IMP;GO:0031253-IDA;GO:0005042-ISS;GO:0005042-IMP;GO:1905812-IGI;GO:0005887-IDA;GO:0005886-TAS;GO:0005886-IDA;GO:1905815-IMP;GO:1905815-IGI;GO:0040018-IMP;GO:0005515-IPI;GO:1905490-IGI;GO:0016199-IGI;GO:0035545-IMP;GO:003554…	neuron migration-IMP;axonal growth cone-IDA;neuroblast migration-IGI;neuroblast migration-IMP;membrane-IDA;membrane-IEA;integral component of membrane-IEA;positive regulation of synapse assembly-IMP;positive regulation of locomotion-IMP;netrin-activated signaling pathway-IMP;netrin-activated signaling pathway-IGI;neuron projection development-IMP;cell projection membrane-IDA;netrin receptor activ…	25	GO:0001764;GO:0005042;GO:0005887;GO:0016199;GO:0019904;GO:0030334;GO:0030513;GO:0031253;GO:0035262;GO:0035545;GO:0038007;GO:0040017;GO:0040018;GO:0042661;GO:0043235;GO:0044295;GO:0045138;GO:0048843;GO:0051965;GO:0061643;GO:0097402;GO:1901048;GO:1905490;GO:1905812;GO:1905815	neuron migration;netrin receptor activity;integral component of plasma membrane;axon midline choice point recognition;protein domain specific binding;regulation of cell migration;positive regulation of BMP signaling pathway;cell projection membrane;gonad morphogenesis;determination of left/right asymmetry in nervous system;netrin-activated signaling pathway;positive regulation of locomotion;posit…	-	-	-	HOMOLOGOUS_SUPERFAMILY;HOMOLOGOUS_SUPERFAMILY;HOMOLOGOUS_SUPERFAMILY;HOMOLOGOUS_SUPERFAMILY;HOMOLOGOUS_SUPERFAMILY;HOMOLOGOUS_SUPERFAMILY	Immunoglobulin-like domain superfamily;Immunoglobulin-like domain superfamily;Immunoglobulin-like domain superfamily;Immunoglobulin-like domain superfamily;Immunoglobulin-like domain superfamily;Immunoglobulin-like domain superfamily	mobidb-lite (MOBIDB_LITE);mobidb-lite (MOBIDB_LITE);mobidb-lite (MOBIDB_LITE);mobidb-lite (MOBIDB_LITE);PTHR13817:SF116 (PANTHER);PTHR13817 (PANTHER)	;
MSTRG.20.2	fibronectin type III domain protein	MNAQRPNADLWIDHPGGNHIRGGPSDYMMNGIGTSAVDMKSLTGPEVVESPPPRYHTMQDSTYGTVSIRHTRTPTRHSVSSYDDDLRRLDLEGRRPVVIGRAKPILATVAYAPTYEDSQGTLSRSYHHSESSLDGQRQRTPQVVYTGSGRHQPIAKVELGDSPYGSTSALTTTPPVPMQAPPPGPPSMIDGYRTLRGGANASSQSQGPFRSFTQLSATPPLPPNGGQASSQHQTRPVVVAAGGRQLPVGRATAQPRVNVTNIYSSYASCSSDIEAEKKQVQSEVVPTVNPAAVRPSNSTEELNAQMENLDTMIDDLQALQHEFGVVS	327	20	0	0.7498	DICVIV_00490;ANCDUO_16767;WR25_04368;Neo1;HPBE_LOCUS5266;Acey_s0092.g2592;ANCCAN_21586;ANCDUO_16767;WR25_04368;NBR_LOCUS12813;WR25_04368;Acey_s0092.g2592;TCNE_LOCUS9716;WR25_04368;WR25_04368;ANCCAN_21586;TCNE_LOCUS9716;OESDEN_04935;WR25_04368;NECAME_14532;HPLM_LOCUS5667;WR25_04368;WR25_04368;NBR_LOCUS12813;Acey_s0092.g2592;WR25_04368;OESDEN_04935;DICVIV_00490;NECAME_14532;Neo1;WR25_04368;HPLM_LOC…	GO:0016020-IEA;GO:0016021-IEA	membrane-IEA;integral component of membrane-IEA	1	GO:0016021	integral component of membrane	-	-	-	HOMOLOGOUS_SUPERFAMILY;HOMOLOGOUS_SUPERFAMILY;HOMOLOGOUS_SUPERFAMILY;HOMOLOGOUS_SUPERFAMILY;HOMOLOGOUS_SUPERFAMILY	Armadillo-type fold;Armadillo-type fold;Armadillo-type fold;Armadillo-type fold;Armadillo-type fold	mobidb-lite (MOBIDB_LITE);mobidb-lite (MOBIDB_LITE);mobidb-lite (MOBIDB_LITE);PTHR13817:SF116 (PANTHER);PTHR13817 (PANTHER)	;
MSTRG.20.3	fibronectin type III domain protein	MNAQRPNADLWIDHPGGNHIRGGPSDYMMNGIGTSAVDMKSLTGPEVVESPPPRYHTMQDSTYGTVSIRHTRTPTRHSVSSYDDDLRRLDLEGRRPVVIGRAKPILATVAYAPTYEDKSSLDGQRQRTPQVVYTGSGRHQPIAKVELGDSPYGSTSALTTTPPVPMQAPPPGPPSMIDGYRTLRGGANASSQSQGPFRSFTQLSATPPLPPNGGQASSQHQTRPVVVAAGGRQLPVGRATAQPRVNVTNIYSSYASCSSDIEAEKKQVQSEVVPTVNPAAVRPSNSTEELNAQMENLDTMIDDLQALQHEFGVVS	315	20	5.8e-180	0.7237	DICVIV_00490;WR25_04368;ANCDUO_16767;WR25_04368;HPBE_LOCUS5266;Acey_s0092.g2592;ANCCAN_21586;ANCDUO_16767;WR25_04368;WR25_04368;WR25_04368;NBR_LOCUS12813;Acey_s0092.g2592;WR25_04368;WR25_04368;WR25_04368;WR25_04368;ANCCAN_21586;OESDEN_04935;WR25_04368;NECAME_14532;HPLM_LOCUS5667;WR25_04368;WR25_04368;NBR_LOCUS12813;Acey_s0092.g2592;WR25_04368;OESDEN_04935;DICVIV_00490;NECAME_14532;WR25_04368;HPLM…	GO:0016020-IEA;GO:0016021-IEA	membrane-IEA;integral component of membrane-IEA	1	GO:0016021	integral component of membrane	-	-	-	HOMOLOGOUS_SUPERFAMILY;HOMOLOGOUS_SUPERFAMILY;HOMOLOGOUS_SUPERFAMILY;HOMOLOGOUS_SUPERFAMILY	Metalloenzyme, LuxS/M16 peptidase-like;Metalloenzyme, LuxS/M16 peptidase-like;Metalloenzyme, LuxS/M16 peptidase-like;Metalloenzyme, LuxS/M16 peptidase-like	mobidb-lite (MOBIDB_LITE);mobidb-lite (MOBIDB_LITE);PTHR13817:SF116 (PANTHER);PTHR13817 (PANTHER)	;
transcript_ACOC_0000002001-mRNA-1	fibronectin type III domain protein	MNAQRPNADLWIDHPGGNHIRGGPSDYMMNGIGTSAVDMKSLTGPEVVESPPPRYHTMQDSTYGTVSIRHTRTPTRHSVSSYDDDLRRLDLEGRRPVVIGRAKPILATVAYAPTYEDSQGTLSRSYHHSESSLDGQRQRTPQVVYTGSGRHQPIAKVELGDSPYGSTSALTTTPPVPMQAPPPGPPSMIDGYRTLRGGANASSQSQGPFRCKFFSSYASCSSDIEAEKKQVQSEVVPTVNPAAVRPSNSTEELNAQMENLDTMIDDLQALQHEFGVVS	278	20	0	0.6846	DICVIV_00490;WR25_04368;ANCDUO_16767;WR25_04368;HPBE_LOCUS5266;Acey_s0092.g2592;ANCCAN_21586;ANCDUO_16767;WR25_04368;NBR_LOCUS12813;Acey_s0092.g2592;WR25_04368;WR25_04368;WR25_04368;ANCCAN_21586;OESDEN_04935;WR25_04368;NECAME_14532;HPLM_LOCUS5667;WR25_04368;WR25_04368;NBR_LOCUS12813;Acey_s0092.g2592;WR25_04368;WR25_04368;OESDEN_04935;DICVIV_00490;NECAME_14532;WR25_04368;HPLM_LOCUS5667;HPBE_LOCUS5…	GO:0016020-IEA;GO:0016021-IEA	membrane-IEA;integral component of membrane-IEA	1	GO:0016020	membrane	-	-	-	HOMOLOGOUS_SUPERFAMILY;HOMOLOGOUS_SUPERFAMILY;HOMOLOGOUS_SUPERFAMILY;HOMOLOGOUS_SUPERFAMILY	Metalloenzyme, LuxS/M16 peptidase-like;Metalloenzyme, LuxS/M16 peptidase-like;Metalloenzyme, LuxS/M16 peptidase-like;Metalloenzyme, LuxS/M16 peptidase-like	mobidb-lite (MOBIDB_LITE);mobidb-lite (MOBIDB_LITE);PTHR13817 (PANTHER);PTHR13817:SF116 (PANTHER)	;
MSTRG.23.1	Eukaryotic DNA topoisomerase I, DNA binding protein	MADVVTSPILTDNQNKSELCGGDSDYGSHSHANGNYEVDVEQPRSVKQEPELSSFEAALAAAAAGVNHRKKENAPPVKKEVYSDDDDIPWAERMAKEKKEKSVEKKKKKRKGSDSEDEYRPEVLDEDEIPWAERLKRDSISSSPKKKRKIEVDSDYEEKNVDKEKWTKKEDSGSNCVYTESRKDKRKKKKKDKEARESNSSSSSSKKTPKKEVKNEQGEILQKKKKKQEEVEDVWEWWKEEKKPAGVKWNSLHHKGPLFAPPYERLPDHVNFKYDGKVVQLSDEAEEVATFYAKMLNHDYTTKDAFNKNFFHDWRKVMSPAERELITDLKKCDFREMTVHFEKQSEIRKAMSKEEKAKIKEAKEAEAKIYGFAFIDGHKQKIGNFRIEPPGLFRGRGGH…	789	20	0	0.8694	DICVIV_00584;OESDEN_04611;LOAG_09811;top-1;ANCCAN_12860;TCNE_LOCUS9889;NBR_LOCUS6984;DME_LOCUS6674;WBA_LOCUS11475;HPLM_LOCUS7923;NLS_LOCUS3549;ASIM_LOCUS12942;NBR_LOCUS6984;top-1;ACOC_LOCUS25;HPBE_LOCUS16287;NLS_LOCUS3549;DME_LOCUS6674;ASIM_LOCUS12942;OESDEN_04611;WBA_LOCUS11475;WBA_LOCUS11475;GCK72_001726;HPLM_LOCUS7923;LOAG_09811;ASIM_LOCUS12942;HPLM_LOCUS7923;LOAG_09811;ASIM_LOCUS12942;WBA_LOC…	GO:0003677-IEA;GO:0031616-IEA;GO:0005694-IEA;GO:0003916-IEA;GO:0003917-IEA;GO:0006265-IEA;GO:0005730-IEA;GO:0016853-IEA;GO:0005634-IEA	DNA binding-IEA;spindle pole centrosome-IEA;chromosome-IEA;DNA topoisomerase activity-IEA;DNA topoisomerase type I (single strand cut, ATP-independent) activity-IEA;DNA topological change-IEA;nucleolus-IEA;isomerase activity-IEA;nucleus-IEA	5	GO:0003677;GO:0003917;GO:0005634;GO:0005694;GO:0006265	DNA binding;DNA topoisomerase type I (single strand cut, ATP-independent) activity;nucleus;chromosome;DNA topological change	EC:5.6.2.1	DNA topoisomerase	IPR001631;IPR025834;IPR013500;IPR008336;IPR013030;IPR013034;IPR014711;IPR014727;IPR013500;IPR011010;IPR036202	FAMILY;DOMAIN;DOMAIN;DOMAIN;HOMOLOGOUS_SUPERFAMILY;HOMOLOGOUS_SUPERFAMILY;HOMOLOGOUS_SUPERFAMILY;HOMOLOGOUS_SUPERFAMILY;HOMOLOGOUS_SUPERFAMILY;HOMOLOGOUS_SUPERFAMILY;HOMOLOGOUS_SUPERFAMILY;HOMOLOGOUS_SUPERFAMILY;HOMOLOGOUS_SUPERFAMILY;HOMOLOGOUS_SUPERFAMILY;HOMOLOGOUS_SUPERFAMILY;HOMOLOGOUS_SUPERFAMILY;DOMAIN;HOMOLOGOUS_SUPERFAMILY;HOMOLOGOUS_SUPERFAMILY;HOMOLOGOUS_SUPERFAMILY	DNA topoisomerase I;Topoisomerase I C-terminal domain;DNA topoisomerase I, catalytic core, eukaryotic-type;DNA topoisomerase I, DNA binding, eukaryotic-type;DNA topoisomerase I, DNA binding, N-terminal domain 2;DNA topoisomerase I, DNA binding, N-terminal domain 1;DNA topoisomerase I, catalytic core, alpha-helical subdomain, eukaryotic-type;DNA topoisomerase I, catalytic core, alpha/beta subdomai…	PR00416 (PRINTS);PF14370 (PFAM);PF01028 (PFAM);PF02919 (PFAM);G3DSA:2.170.11.10 (GENE3D);G3DSA:1.10.10.41 (GENE3D);G3DSA:3.90.15.10 (GENE3D);G3DSA:1.10.132.10 (GENE3D);mobidb-lite (MOBIDB_LITE);mobidb-lite (MOBIDB_LITE);mobidb-lite (MOBIDB_LITE);mobidb-lite (MOBIDB_LITE);mobidb-lite (MOBIDB_LITE);PTHR10290 (PANTHER);PTHR10290:SF1 (PANTHER);cd03488 (CDD);cd00659 (CDD);SSF56349 (SUPERFAMILY);SSF567…	DNA binding/DNA topological change/DNA topoisomerase type I (single strand cut, ATP-independent) activity;DNA binding/DNA topological change/DNA topoisomerase type I (single strand cut, ATP-independent) activity;DNA binding/DNA topological change/DNA topoisomerase type I (single strand cut, ATP-independent) activity;DNA binding/chromosome/DNA topological change/DNA topoisomerase type I (single st…
transcript_ACOC_0000002401-mRNA-1	Eukaryotic DNA topoisomerase I, DNA binding protein	MADVVTSPILTDNQNKSELCGGDSDYGSHSHANGNYEVDVEQPRSVKQEPELSSFEAALAAAAAGVNHRKKENAPPVKKEVYSDDDDIPWAERMAKEKKEKSVEKKKKKRKGSDSEDEYRPEVLDEDEIPWAERLKRDSISSSPKKKRKIEVDSDYEEKNVDKEKWTKKEDSGSNCVYTESRKDKRKKKKKDKEARESNSSSSSSKKTPKKEVKNEQGEILQKKKKKQEEVEDVWEWWKEEKKPAGVKWNSLHHKGPLFAPPYERLPDHVNFKYDGKVVQLSDEAEEVATFYAKMLNHDYTTKDAFNKNFFHDWRKVMSPAERELITDLKKCDFREMTVHFEKQSEIRKAMSKEEKAKIKEAKEAEAKIYGFAFIDGHKQKIGNFRIEPPGLFRGRGGH…	634	20	0	0.8357	DICVIV_00584;OESDEN_04611;LOAG_09811;top-1;ANCCAN_12860;TCNE_LOCUS9889;NBR_LOCUS6984;WBA_LOCUS11475;HPLM_LOCUS7923;NLS_LOCUS3549;ASIM_LOCUS12942;NBR_LOCUS6984;top-1;ACOC_LOCUS25;NOO_LOCUS4136;HPBE_LOCUS16287;NLS_LOCUS3549;ASIM_LOCUS12942;OESDEN_04611;WBA_LOCUS11475;WBA_LOCUS11475;HPLM_LOCUS7923;LOAG_09811;ASIM_LOCUS12942;HPLM_LOCUS7923;Acey_s0170.g263;LOAG_09811;ASIM_LOCUS12942;Acey_s0170.g263;NO…	GO:0003677-IEA;GO:0031616-IEA;GO:0005694-IEA;GO:0003916-IEA;GO:0003917-IEA;GO:0006265-IEA;GO:0005730-IEA;GO:0016853-IEA;GO:0005634-IEA	DNA binding-IEA;spindle pole centrosome-IEA;chromosome-IEA;DNA topoisomerase activity-IEA;DNA topoisomerase type I (single strand cut, ATP-independent) activity-IEA;DNA topological change-IEA;nucleolus-IEA;isomerase activity-IEA;nucleus-IEA	4	GO:0003677;GO:0003917;GO:0005694;GO:0006265	DNA binding;DNA topoisomerase type I (single strand cut, ATP-independent) activity;chromosome;DNA topological change	EC:5.6.2.1	DNA topoisomerase	IPR001631;IPR014711;IPR013500;IPR008336;IPR013030;IPR013034;IPR036202;IPR011010	FAMILY;HOMOLOGOUS_SUPERFAMILY;DOMAIN;DOMAIN;HOMOLOGOUS_SUPERFAMILY;HOMOLOGOUS_SUPERFAMILY;HOMOLOGOUS_SUPERFAMILY;HOMOLOGOUS_SUPERFAMILY;HOMOLOGOUS_SUPERFAMILY;HOMOLOGOUS_SUPERFAMILY;HOMOLOGOUS_SUPERFAMILY;HOMOLOGOUS_SUPERFAMILY;HOMOLOGOUS_SUPERFAMILY;HOMOLOGOUS_SUPERFAMILY;HOMOLOGOUS_SUPERFAMILY;HOMOLOGOUS_SUPERFAMILY	DNA topoisomerase I;DNA topoisomerase I, catalytic core, alpha-helical subdomain, eukaryotic-type;DNA topoisomerase I, catalytic core, eukaryotic-type;DNA topoisomerase I, DNA binding, eukaryotic-type;DNA topoisomerase I, DNA binding, N-terminal domain 2;DNA topoisomerase I, DNA binding, N-terminal domain 1;DNA topoisomerase I, DNA binding, N-terminal domain 1;DNA topoisomerase I, DNA binding, N-…	PR00416 (PRINTS);G3DSA:3.90.15.10 (GENE3D);PF01028 (PFAM);PF02919 (PFAM);G3DSA:2.170.11.10 (GENE3D);G3DSA:1.10.10.41 (GENE3D);mobidb-lite (MOBIDB_LITE);mobidb-lite (MOBIDB_LITE);mobidb-lite (MOBIDB_LITE);mobidb-lite (MOBIDB_LITE);mobidb-lite (MOBIDB_LITE);PTHR10290 (PANTHER);PTHR10290:SF1 (PANTHER);cd03488 (CDD);SSF56741 (SUPERFAMILY);SSF56349 (SUPERFAMILY)	DNA binding/DNA topological change/DNA topoisomerase type I (single strand cut, ATP-independent) activity;DNA binding/DNA topological change/DNA topoisomerase type I (single strand cut, ATP-independent) activity;DNA binding/DNA topological change/DNA topoisomerase type I (single strand cut, ATP-independent) activity;DNA binding/DNA topological change/DNA topoisomerase type I (single strand cut, A…
MSTRG.24.1	unnamed protein product	MGPGVLRRLSPSAHPDLEKIASTRDASRGMDLRRDRLHRGKTWEVARERYQERKELSCLSLDMVLVSLSAEKRLQSRRAVKRIAKNVRASIRSPRWYDVNQDFWLTLEKSQQDDFSRICSRKLLLIRLQIKEILRGMNAGEYSVDDLVSNTRLNKESVLAVLRKHGYGVEQEGCDAVVKSAGPVYPPKGNSVTFDLPVLDISDVRKERRSPETPEKQRVVEEVTHDSDAHTPLCSLVDDTTLFIGESPREVTDSSAEISDLAKRLGARLCQERSLVDQLRNIGREKSFVEQLREVVTSSSTTQTRVKEFHFIPSTPLSKPTLPVTIHCKETDVQTSIRFEAPIIANKETRDNATDLPSLDCISMSEHGALQQLAGAFIIQEDVSSSTVSSDQSAGQVPE…	827	20	0	0.8183	FL81_22447;ACOC_LOCUS27;CRE_03704;Acey_s0170.g265;ANCCAN_12858;FL83_17358;ANCDUO_08860;HPLM_LOCUS17630;Acey_s0170.g265;OESDEN_04609;CRE_03704;ANCCEY_08044;Acey_s0170.g265;Acey_s0170.g265;FL83_17358;ANCDUO_08860;HPLM_LOCUS17630;CELE_Y71G12B.23;FL82_07776;ANCCEY_08044;OESDEN_04609;Acey_s0170.g265;NECAME_05437;GCK72_001167;ACOC_LOCUS27;HPLM_LOCUS1711;CELE_Y71G12B.23;FL81_22447;HPLM_LOCUS1711;FL82_07…	GO:0016020-IEA;GO:0016021-IEA	membrane-IEA;integral component of membrane-IEA	1	GO:0016021	integral component of membrane	-	-	IPR004254;IPR004254	FAMILY;FAMILY;FAMILY;FAMILY;FAMILY;FAMILY;FAMILY;FAMILY	AdipoR/Haemolysin-III-related;AdipoR/Haemolysin-III-related;AdipoR/Haemolysin-III-related;AdipoR/Haemolysin-III-related;AdipoR/Haemolysin-III-related;AdipoR/Haemolysin-III-related;AdipoR/Haemolysin-III-related;AdipoR/Haemolysin-III-related	PF03006 (PFAM);mobidb-lite (MOBIDB_LITE);mobidb-lite (MOBIDB_LITE);mobidb-lite (MOBIDB_LITE);mobidb-lite (MOBIDB_LITE);mobidb-lite (MOBIDB_LITE);PTHR20855 (PANTHER);PTHR20855:SF3 (PANTHER)	integral component of membrane;integral component of membrane;
MSTRG.25.1	SH2 domain protein	MVLPPTAAELRGSGIQFTFEYLGSVPVIVALHEMTDDMRPLVVKECINIIAGSSGIIPIRETNAIIKLLVGEPELANHKVELNISTKALTIIYADDKNKEKMNRMIARHNIELVSFAAQGSEESSTADMFGYIAKRRDETDRRCHVFRFNDVPRVMHIIDDAIRLATRDTPMPPPILPTSGIVNMDPPFGHELRPQPLAPSPRPANRSRIPDRPSPELGVRDDPNGVLGLDLQDKPWFHGELDRAAAEYLLQKDGDFLVRTSANSPGQFILDGVEQGNYRHILLINDGVVRTMNNIFPSVSALITYHYGNRLPISTKESVIYLTNPILK	329	20	0	0.8207	DICVIV_00586;shc-1;Acey_s0170.g269;Acey_s0170.g269;shc-1;shc-1;Acey_s0170.g269;shc-1;Acey_s0170.g269;Acey_s0170.g269;shc-1;shc-1;Acey_s0170.g269;HPBE_LOCUS14068;shc-1;shc-1;shc-1;shc-1;shc-1;HPBE_LOCUS14068;Acey_s0170.g269;shc-1;Acey_s0170.g269;HPBE_LOCUS14068;HPBE_LOCUS14070;shc-1;shc-1;shc-1;shc-1;shc-1;Acey_s0170.g269;TELCIR_14345;DICVIV_00586	GO:0005515-IPI;GO:0005737-IDA;GO:0005737-IEA;GO:0048863-IEA;GO:0016020-IEA;GO:0016021-IEA;GO:0030971-IBA;GO:0030971-IEA;GO:0033674-IDA;GO:0048680-IMP;GO:0035556-IEA;GO:0010038-IMP;GO:0031434-IPI;GO:0034976-IMP;GO:0031435-IPI;GO:0008284-IEA;GO:0007169-IBA;GO:0005159-IPI;GO:0005634-IDA;GO:0005634-IEA;GO:0005886-IBA;GO:0005886-IEA	protein binding-IPI;cytoplasm-IDA;cytoplasm-IEA;stem cell differentiation-IEA;membrane-IEA;integral component of membrane-IEA;receptor tyrosine kinase binding-IBA;receptor tyrosine kinase binding-IEA;positive regulation of kinase activity-IDA;positive regulation of axon regeneration-IMP;intracellular signal transduction-IEA;response to metal ion-IMP;mitogen-activated protein kinase kinase binding…	6	GO:0005622;GO:0008284;GO:0016021;GO:0030971;GO:0035556;GO:0048863	intracellular;positive regulation of cell population proliferation;integral component of membrane;receptor tyrosine kinase binding;intracellular signal transduction;stem cell differentiation	-	-	IPR000980;IPR036860;IPR006020;IPR011993;IPR029596;IPR029596;IPR000980;IPR006020;IPR036860	DOMAIN;HOMOLOGOUS_SUPERFAMILY;DOMAIN;HOMOLOGOUS_SUPERFAMILY;HOMOLOGOUS_SUPERFAMILY;HOMOLOGOUS_SUPERFAMILY;FAMILY;FAMILY;FAMILY;FAMILY;DOMAIN;DOMAIN;HOMOLOGOUS_SUPERFAMILY;HOMOLOGOUS_SUPERFAMILY	SH2 domain;SH2 domain superfamily;PTB/PI domain;PH-like domain superfamily;PH-like domain superfamily;PH-like domain superfamily;SHC-transforming protein 4;SHC-transforming protein 4;SHC-transforming protein 4;SHC-transforming protein 4;SH2 domain;PTB/PI domain;SH2 domain superfamily;SH2 domain superfamily	PF00017 (PFAM);G3DSA:3.30.505.10 (GENE3D);PF00640 (PFAM);G3DSA:2.30.29.30 (GENE3D);mobidb-lite (MOBIDB_LITE);mobidb-lite (MOBIDB_LITE);PTHR10337:SF12 (PANTHER);PTHR10337 (PANTHER);PTHR10337 (PANTHER);PTHR10337:SF12 (PANTHER);PS50001 (PROSITE_PROFILES);PS01179 (PROSITE_PROFILES);SSF55550 (SUPERFAMILY);SSF50729 (SUPERFAMILY)	;protein binding;receptor tyrosine kinase binding/positive regulation of cell population proliferation/stem cell differentiation;receptor tyrosine kinase binding/positive regulation of cell population proliferation/stem cell differentiation;protein binding;
MSTRG.27.1	DEgenerin Like	MICKAICNTLVIVFLVSLCSVLFVLQSLYFIFRITEDTEKEQIKTIDGSPLSLPAIIICNRMPFSQDGTDSVNRDLRQDPVIRYLLEWARPSLRDEPDYVRLSHTYLNAGQTILLQYLPQNNRNQSINQMEYMCQSVINSCSYKERNIQAYECCKNVIYKVATTNGLCWVFYDRYMSQDSSQPMQQFSLTFQMSRNSWYSQQTTPIHPGIDIYLKENVNDIMTIVNQLENPIRLLDKKGIHIKIHKEKRVDLRRKLCGSSLSDAELADKNALARNETNILMCVIMIAAELGRSVLSFSNPIQVKPAVGPKESTSPGA	317	20	0	0.7747	ANCDUO_05621;ANCCAN_05830;FL83_13153;FL83_13153;DICVIV_00587;DICVIV_00587;HPLM_LOCUS19952;ACOC_LOCUS29;del-3;CAEBREN_31533;CAEBREN_31533;ANCCEY_08047;NBR_LOCUS6996;NECAME_05441;NBR_LOCUS6996;ANCCEY_08047;ANCDUO_05621;NBR_LOCUS6996;DICVIV_00587;ANCDUO_05621;ANCCEY_08047;DICVIV_00587;ACOC_LOCUS29;del-3;CAEBREN_31533;WR25_21695;ANCDUO_26219;TELCIR_14862;ANCCEY_08047;Cni-del-3;ANCCEY_08047;HPLM_LOCUS…	GO:0006814-IEA;GO:0005272-IEA;GO:0016020-IEA;GO:0016021-IEA;GO:0035725-IEA;GO:0006811-IEA	sodium ion transport-IEA;sodium channel activity-IEA;membrane-IEA;integral component of membrane-IEA;sodium ion transmembrane transport-IEA;ion transport-IEA	3	GO:0005272;GO:0016021;GO:0035725	sodium channel activity;integral component of membrane;sodium ion transmembrane transport	-	-	IPR001873;IPR001873	FAMILY;FAMILY;FAMILY	Epithelial sodium channel;Epithelial sodium channel;Epithelial sodium channel	PF00858 (PFAM);PTHR11690:SF246 (PANTHER);PTHR11690 (PANTHER)	sodium channel activity/sodium ion transport/membrane;sodium channel activity/sodium ion transport/membrane
transcript_ACOC_0000002801-mRNA-1	DEgenerin Like	MIFIEHFITCNIDGSPLSLPAIIICNRMPFSQDGTDSVNRDLRQDPVIRYLLEWARPSLRDEPDYVRLSHTYLNAGQTILLQYLPQNNRNQSINQMEYMCQSVINSCSYKRNIQAYECCKNVIYKVATTNGLCWVFYDRYMSQDSSQPMQQFSLTFQMSRNSWYSQQTTPIHPGIDIYLKENVNDIMTIVNQLENPIRLLDKKGIHIKIHKEKRVDLRRKLCGSSLSDAELADKNALARNETNILMCVIMISMQYCGCHPLLAEMIPEISLRDFSLRVNSTQVCTLDQYETCARPYVHMARPSSWLEPVPKDMLGAADISYCRRKNPYPCQTVSYPGIIDHYDLPSVYQNTQDFVARLVLQYTTTQVTEVLKTNGSNVYELLSYIGYNIATWFTIAKFF…	430	20	0	0.7364	WR25_27186;ANCCAN_05830;FL83_13153;FL81_16733;FL81_16733;FL83_13153;DICVIV_00587;DICVIV_00587;ACOC_LOCUS29;CAEBREN_31533;del-3;CAEBREN_31533;OESDEN_16368;NBR_LOCUS6996;NECAME_05441;NBR_LOCUS6996;HPLM_LOCUS15608;NBR_LOCUS6996;DICVIV_00587;FL82_08176;DICVIV_00587;ACOC_LOCUS29;CAEBREN_31533;del-3;OESDEN_16368;FL81_16733;Cni-del-3;ACOC_LOCUS29;del-3;CAEBREN_31533;OESDEN_16368;ANCCAN_23817;del-3;FL81_…	GO:0006814-IEA;GO:0005272-IEA;GO:0016020-IEA;GO:0016021-IEA;GO:0035725-IEA;GO:0006811-IEA	sodium ion transport-IEA;sodium channel activity-IEA;membrane-IEA;integral component of membrane-IEA;sodium ion transmembrane transport-IEA;ion transport-IEA	3	GO:0005272;GO:0016021;GO:0035725	sodium channel activity;integral component of membrane;sodium ion transmembrane transport	-	-	IPR001873	FAMILY;FAMILY	Epithelial sodium channel;Epithelial sodium channel	PTHR11690 (PANTHER);PTHR11690:SF246 (PANTHER)	sodium channel activity/sodium ion transport/membrane;
transcript_ACOC_0000003001-mRNA-1	shTK domain protein	MCLSRFGRQDGKLDFWKTAKNLNGFWDVMVDEQVGNELLERLSKYEIGYIKTIDDVQKLITAKERAERPRRLHDESSGPFYDFGRYGSYEDMVSWMRALAKDDPRHVLFLSIGTTHEGRSIDGVELTAHYKTDSTIQKLFEHITFVIVPCVNPDGYEFTRSSTNPHIRLWRKNRSLMQCREDNWGRKRCCRGVDLNRNFDFHFKETGSSDDPCSEIYQGTAAFSEPETRAIRDAILSRRYRGRVDAFITLHTYSQIWIHPYGHRKDSYPGDIRELYDVGKKAAKALQKVYGTKYVVGSGADTEDWAKHTGGIKFVYLLELRPDEKNWDGFILDESELIPTARETWEGVKVVASAVLERIQQQQPEAIEAPKAKRFRFGDGTEGSCYDLRHACKRWVAER…	421	20	0	0.7845	CAEBREN_28872;HPLM_LOCUS15607;CELE_T06A4.3;Acey_s0170.g280;CELE_T06A4.3;CAEBREN_28872;Acey_s0170.g280;HPLM_LOCUS15607;ACOC_LOCUS31;OESDEN_10273;OESDEN_10273;Cni-T06A4.3;Acey_s0170.g280;CELE_T06A4.3;FL81_14374;CELE_T06A4.3;ACOC_LOCUS31;Cni-T06A4.3;NBR_LOCUS6997;Cni-T06A4.3;TCLT_LOCUS63;Acey_s0170.g280;CAEBREN_28872;HPLM_LOCUS15607;Cni-T06A4.3;NBR_LOCUS6997;CELE_T06A4.3;C7TNR7;NBR_LOCUS6997;Acey_s0…	GO:0004181-IBA;GO:0004181-IEA;GO:0008270-IEA;GO:0004180-IEA;GO:0005615-IBA;GO:0006508-IBA;GO:0006508-IEA;GO:0016020-IEA;GO:0016021-IEA	metallocarboxypeptidase activity-IBA;metallocarboxypeptidase activity-IEA;zinc ion binding-IEA;carboxypeptidase activity-IEA;extracellular space-IBA;proteolysis-IBA;proteolysis-IEA;membrane-IEA;integral component of membrane-IEA	5	GO:0004181;GO:0005615;GO:0006508;GO:0008270;GO:0016021	metallocarboxypeptidase activity;extracellular space;proteolysis;zinc ion binding;integral component of membrane	EC:3.4.17	Acting on peptide bonds (peptidases)	IPR000834;IPR036990;IPR000834;IPR003146;IPR003582;IPR003582	DOMAIN;HOMOLOGOUS_SUPERFAMILY;DOMAIN;DOMAIN;DOMAIN;DOMAIN;DOMAIN;DOMAIN;DOMAIN;DOMAIN;DOMAIN;DOMAIN	Peptidase M14, carboxypeptidase A;Metallocarboxypeptidase-like, propeptide;Peptidase M14, carboxypeptidase A;Carboxypeptidase, activation peptide;Carboxypeptidase, activation peptide;ShKT domain;ShKT domain;ShKT domain;ShKT domain;ShKT domain;ShKT domain;ShKT domain	PR00765 (PRINTS);G3DSA:3.30.70.340 (GENE3D);PF00246 (PFAM);PF02244 (PFAM);G3DSA:3.40.630.10 (GENE3D);PF01549 (PFAM);PTHR11705 (PANTHER);PTHR11705:SF49 (PANTHER);PS51670 (PROSITE_PROFILES);cd03860 (CDD);SSF54897 (SUPERFAMILY);SSF53187 (SUPERFAMILY)	metallocarboxypeptidase activity/zinc ion binding/proteolysis;metallocarboxypeptidase activity/zinc ion binding/proteolysis;
transcript_ACOC_0000003101-mRNA-1	shTK domain protein	MVVVVVIVATVFVTSVVVVGGDESSPPTSQKPPPHRTEVVSVYRLLPKNHTQFNVIRSLYDNSTHLQAGFVDFTAAFRFGYVG	83	6	1.1e-52	0.769	Acey_s0170.g280;DICVIV_00588;Acey_s0170.g280;Acey_s0170.g280;DICVIV_00588;DICVIV_00588;Acey_s0170.g280;C7TNR7;C7TNR7;DICVIV_00588;C7TNR7;Acey_s0170.g280;DICVIV_00588;Acey_s0170.g280	GO:0004181-IEA;GO:0008270-IEA;GO:0006508-IEA;GO:0016020-IEA;GO:0016021-IEA	metallocarboxypeptidase activity-IEA;zinc ion binding-IEA;proteolysis-IEA;membrane-IEA;integral component of membrane-IEA	4	GO:0004181;GO:0006508;GO:0008270;GO:0016021	metallocarboxypeptidase activity;proteolysis;zinc ion binding;integral component of membrane	EC:3.4.17	Acting on peptide bonds (peptidases)	-	-	-	-	-
transcript_ACOC_0000003201-mRNA-1	ShKT domain-containing protein	MGSEAPICVNDEKSKNPFSTRVMRKNDNRWARIHFALAQYHSFADVINYLNALALTYPEKVSVEPIGTTHEGRQIPLIKITNKRLVGPKKGIWIDGGIHAREWISPATVLYFIHMLVTQYDKDPQVQQFVDNIEWYIVPLLNPDGYEYSRSSSNPEIRLWRKNRSPPKCIQQSTGLFTVPQTVCCQGVDLNRNFDWFFGQVGSSTDPCSEIYQGAYAFSEPETASVRDFLQRHKVHTFLTFHSYSQILMYPFGHQIRTYSSDFNDLRSTALSASSHLQRMFGTTYKVGTGADTLYPASGGSEDWAKGRARVKYSYLFELRPEEQVWDGFLLSENQIMPTARETWEAVKVIALQTMALPVVARQRHCVDRDALCASWAESGACSSWPEMKQRCPLSCGVC…	401	20	0	0.8861	FL82_16143;FL82_16143;ACOC_LOCUS33;CELE_Y18H1A.9;DICVIV_00589;ACOC_LOCUS33;CELE_Y18H1A.9;ANCCEY_08049;ANCCEY_08049;CELE_Y18H1A.9;CAEBREN_32266;NECAME_05442;HPLM_LOCUS14687;Cni-Y18H1A.9;FL81_14376;FL83_06303;Acey_s0170.g281;FL83_06303;ACOC_LOCUS33;NECAME_05442;NECAME_05442;CRE_20720;FL82_16143;Cni-Y18H1A.9;FL81_14376;CAEBREN_01888;DICVIV_00589;CELE_Y18H1A.9;ANCCAN_05834;CRE_20720;NECAME_05442;HPLM…	GO:0004181-IBA;GO:0004181-IEA;GO:0008270-IEA;GO:0005615-IBA;GO:0004180-IEA;GO:0006508-IBA;GO:0006508-IEA;GO:0016020-IEA;GO:0016021-IEA	metallocarboxypeptidase activity-IBA;metallocarboxypeptidase activity-IEA;zinc ion binding-IEA;extracellular space-IBA;carboxypeptidase activity-IEA;proteolysis-IBA;proteolysis-IEA;membrane-IEA;integral component of membrane-IEA	5	GO:0004181;GO:0005615;GO:0006508;GO:0008270;GO:0016021	metallocarboxypeptidase activity;extracellular space;proteolysis;zinc ion binding;integral component of membrane	EC:3.4.17	Acting on peptide bonds (peptidases)	IPR000834;IPR003582;IPR000834;IPR003582	DOMAIN;DOMAIN;DOMAIN;DOMAIN;DOMAIN;DOMAIN;DOMAIN;DOMAIN;DOMAIN	Peptidase M14, carboxypeptidase A;ShKT domain;Peptidase M14, carboxypeptidase A;Peptidase M14, carboxypeptidase A;Peptidase M14, carboxypeptidase A;Peptidase M14, carboxypeptidase A;ShKT domain;ShKT domain;ShKT domain	PR00765 (PRINTS);PF01549 (PFAM);PF00246 (PFAM);G3DSA:3.40.630.10 (GENE3D);PTHR11705:SF69 (PANTHER);PTHR11705 (PANTHER);PS51670 (PROSITE_PROFILES);cd03860 (CDD);SSF53187 (SUPERFAMILY)	metallocarboxypeptidase activity/zinc ion binding/proteolysis;metallocarboxypeptidase activity/zinc ion binding/proteolysis;
MSTRG.30.1	ShKT domain-containing protein	MISYRLLVILLSLLIWSSISRKFTVHRLKPTTKSDVDFLQDLLVNNVKLDFWKSPTQPGNEVHVMVDDVVEPELMKLLNERNITHSVMIDDVRKVIVGQNEQHDKLKSQLRLKDWREGKIHFALAQYHSFADVINYLNALALTYPEKVSVEPIGTTHEGRQIPLIKITNKRLVGPKKGIWIDGGIHAREWISPATVLYFIHMLVTQYDKDPQVQQFVDNIEWYIVPLLNPDGYEYSRSSSNPEIRLWRKNRSPPKCIQQSTGLFTVPQTVCCQGVDLNRNFDWFFGQVGSSTDPCSEIYQGAYAFSEPETASVRDFLQRHKVHTFLTFHSYSQILMYPFGHQIRTYSSDFNDLRSTALSASSHLQRMFGTTYKVGTGADTLYPASGGSEDWAKGRARVK…	493	20	0	0.8986	FL82_16143;FL82_16143;ACOC_LOCUS33;CELE_Y18H1A.9;DICVIV_00589;ACOC_LOCUS33;CELE_Y18H1A.9;ANCCEY_08049;ANCCEY_08049;CELE_Y18H1A.9;CAEBREN_32266;NECAME_05442;HPLM_LOCUS14687;Cni-Y18H1A.9;FL81_14376;FL83_06303;Acey_s0170.g281;FL83_06303;ACOC_LOCUS33;NECAME_05442;NECAME_05442;CRE_20720;FL82_16143;Cni-Y18H1A.9;FL81_14376;CAEBREN_01888;DICVIV_00589;CELE_Y18H1A.9;ANCCAN_05834;CRE_20720;NECAME_05442;HPLM…	GO:0004181-IBA;GO:0004181-IEA;GO:0008270-IEA;GO:0005615-IBA;GO:0004180-IEA;GO:0006508-IBA;GO:0006508-IEA;GO:0016020-IEA;GO:0016021-IEA	metallocarboxypeptidase activity-IBA;metallocarboxypeptidase activity-IEA;zinc ion binding-IEA;extracellular space-IBA;carboxypeptidase activity-IEA;proteolysis-IBA;proteolysis-IEA;membrane-IEA;integral component of membrane-IEA	5	GO:0004181;GO:0005615;GO:0006508;GO:0008270;GO:0016021	metallocarboxypeptidase activity;extracellular space;proteolysis;zinc ion binding;integral component of membrane	EC:3.4.17	Acting on peptide bonds (peptidases)	IPR000834;IPR036990;IPR003582;IPR003146;IPR000834;IPR003582	DOMAIN;HOMOLOGOUS_SUPERFAMILY;DOMAIN;DOMAIN;DOMAIN;DOMAIN;DOMAIN;DOMAIN;DOMAIN;DOMAIN;DOMAIN;DOMAIN	Peptidase M14, carboxypeptidase A;Metallocarboxypeptidase-like, propeptide;ShKT domain;ShKT domain;Carboxypeptidase, activation peptide;Peptidase M14, carboxypeptidase A;Peptidase M14, carboxypeptidase A;Peptidase M14, carboxypeptidase A;ShKT domain;ShKT domain;ShKT domain;ShKT domain	PR00765 (PRINTS);G3DSA:3.30.70.340 (GENE3D);PF01549 (PFAM);G3DSA:3.40.630.10 (GENE3D);PF02244 (PFAM);PF00246 (PFAM);PTHR11705 (PANTHER);PTHR11705:SF69 (PANTHER);PS51670 (PROSITE_PROFILES);cd03860 (CDD);SSF54897 (SUPERFAMILY);SSF53187 (SUPERFAMILY)	metallocarboxypeptidase activity/zinc ion binding/proteolysis;metallocarboxypeptidase activity/zinc ion binding/proteolysis;
MSTRG.31.1	zona pellucida-like domain protein	MSILIILFLFLLPTTQTLPAIINSSIACDKTDFLLRIKFNETFTGLIQTEKGEPNCIYVNASIQRSLDYEVKIPLIGCETRRSEDGNYENEITIQNNDVFDAKSDKRYLLTCIPANPAFRDSQVTVSFGGITIDNAATTAISLVNSSKVEYEVTVRDGNDLSAPPLKRPLLVGDRVVWGDFEVLRDDYGTTFLSHIKAWAFPTSNEVNIFCNLHLCSDCTQAVCRNRRRRVPPVVMDVTNFRARDDYAPPIPVRASFRLRRDATSAAVTTQKASSSVSRHLNAAAAATTTGRVFPSALYLIRLCPSSYLSVYVFSCVAVWCSS	323	20	1.5e-164	0.7514	NECAME_05444;NECAME_05444;PRIPAC_48052;PRIPAC_48052	GO:0016020-IEA;GO:0016021-IEA	membrane-IEA;integral component of membrane-IEA	1	GO:0016021	integral component of membrane	-	-	IPR001507	HOMOLOGOUS_SUPERFAMILY;HOMOLOGOUS_SUPERFAMILY;HOMOLOGOUS_SUPERFAMILY;DOMAIN	Phosphoribosyltransferase-like;Phosphoribosyltransferase-like;Phosphoribosyltransferase-like;Zona pellucida domain	PTHR46560:SF8 (PANTHER);PTHR46560 (PANTHER);PTHR46560 (PANTHER);PS51034 (PROSITE_PROFILES)	;
transcript_ACOC_0000003301-mRNA-1	zona pellucida-like domain protein	MLTDFLLRIKFNETFTGLIQTEKGEPNCIYVNASIQRSLDYEVKIPLIGCETRRSEDGNYENEITIQNNDVFDAKSDKRYLLTCIPANPAFRDSQVTVSFGGITIDNAATTAISLVNSSKVEYEVTVRDGNDLSAPPLKRPLLVGDRVVFGNFERLSRGRIGRCWASDGKSELDLSDNDGCSLQRAGEASIKKFFYKGARKHSHSYPLRFLQVWGDFEVLRDDYGTTFLSHIKAWAFPTSNEVNIFCNLHLCSDCTQAVCRNRRRRVPPVVMDVTNFRARDDYAPPIPVRASFRLRRDATSAAVTTQKASSSVSRHLNAAAAATTTGRVFPSALYLMLFIVLI	343	20	0	0.7284	NECAME_05444;Cbn-cutl-20;Cbn-cutl-20;NECAME_05444	GO:0016020-IEA;GO:0016021-IEA	membrane-IEA;integral component of membrane-IEA	1	GO:0016021	integral component of membrane	-	-	IPR001507	HOMOLOGOUS_SUPERFAMILY;HOMOLOGOUS_SUPERFAMILY;HOMOLOGOUS_SUPERFAMILY;HOMOLOGOUS_SUPERFAMILY;DOMAIN	Fibronectin type III superfamily;Fibronectin type III superfamily;Fibronectin type III superfamily;Fibronectin type III superfamily;Zona pellucida domain	PTHR46560:SF8 (PANTHER);PTHR46560:SF8 (PANTHER);PTHR46560 (PANTHER);PTHR46560 (PANTHER);PS51034 (PROSITE_PROFILES)	;
MSTRG.32.1	Sodium:neurotransmitter symporter domain containing protein	MGDVLFKSLDVFSSDMPWYHCVGSKSRAYCHSTQRDCRSVKPFGYLPSLYQRRYYNVDVFTAQLSNELRSVNLTDTIPLVHYNLASYSDFYTLTLTTWPSSIFMAWTVITFVMIAYSLAENRESVIKTISYICVCLIFLGSFLFYFVYTYLKPPQYPAYNFVDAINSTQWRTLSPWIEAVVMACTTLQLGHGGVIFLGTQSHFFNNLITDAIVITTLTTIIFIFQAMVHAETRNAFVLQMAQGDFNVFSQTYLNLNNYTVKANRASSKIYAIFMGSLEAYGDLYPPLIFILSLFGTVSAISSKFIRVEIISSVVMEYCGFVHSNVTRSILLCIICLMVSLFTLVFSCSDCYLFQVSLATNVLPMTALVVLLCELFVIVFFYGIRRLFSNVATMVTSGTR…	1304	20	4.5e-170	0.6247	ACOC_LOCUS36;NBR_LOCUS16729;DICVIV_00594;TELCIR_06276;OESDEN_07890;ACOC_LOCUS36;NBR_LOCUS16729;ACOC_LOCUS36;Acey_s0211.g2215;ACOC_LOCUS37;OESDEN_14570;Acey_s0211.g2215;DICVIV_11676;OESDEN_07890;TELCIR_06276;DICVIV_11676;DICVIV_00593;DICVIV_00592;ANCCEY_10014;DICVIV_00594;ANCCEY_10014;Acey_s0012.g1860;OESDEN_14570;ANCCEY_10014;DICVIV_11676;DICVIV_00593;ACOC_LOCUS7696;Acey_s0211.g2215;DICVIV_00592;…	GO:0055085-IEA;GO:0016020-IEA;GO:0016021-IEA;GO:0015293-IEA	transmembrane transport-IEA;membrane-IEA;integral component of membrane-IEA;symporter activity-IEA	1	GO:0016021	integral component of membrane	-	-	IPR000175;IPR000175;IPR000175;IPR000175;IPR037272;IPR037272	FAMILY;FAMILY;FAMILY;FAMILY;FAMILY;FAMILY;HOMOLOGOUS_SUPERFAMILY;HOMOLOGOUS_SUPERFAMILY	Sodium:neurotransmitter symporter;Sodium:neurotransmitter symporter;Sodium:neurotransmitter symporter;Sodium:neurotransmitter symporter;Sodium:neurotransmitter symporter;Sodium:neurotransmitter symporter;Sodium:neurotransmitter symporter superfamily;Sodium:neurotransmitter symporter superfamily	PF00209 (PFAM);mobidb-lite (MOBIDB_LITE);mobidb-lite (MOBIDB_LITE);PTHR11616 (PANTHER);PS50267 (PROSITE_PROFILES);PS50267 (PROSITE_PROFILES);SSF161070 (SUPERFAMILY);SSF161070 (SUPERFAMILY)	integral component of membrane;integral component of membrane;integral component of membrane;integral component of membrane;
transcript_ACOC_0000003601-mRNA-1	unnamed protein product	MGDVLFKSLDVFSSDMPWYHCVGSKSRAYCHSTQRDCRSVKPFGYLPSLYQRRYYNVDVFTAQLSNELRSVNLTDTIPLVHYNDAIVITTLTTIIFIFQAMVHAETRNAFVLQMAQGDFNVFSQTYLNLNNYTVKANRASSKIYAIFMGSLEAYGDLYPPLIFILSLFGTVSAISSKDCYLFQVSLATNVLPMTALVVLLCELFVIVFFYGIRRLFSNVATMVTSGTRRHSQIKMTDYLLNLLMAALWIGVIPIALSPAEPILNMQCNWERGQKRDGKKHGDEDRISAGDFKKIRKGCEGGKKSKRDEQKKASPSKQGRKSEGRLEGGKINVDRQNREKLDENHVSRGQNKKSYGRKGHRLSGEGMSGESCSRERHGRHRAGGEVVSGESHSREGYSRN…	436	17	0	0.614	ACOC_LOCUS36;NBR_LOCUS16729;DICVIV_00594;OESDEN_07890;ACOC_LOCUS36;NBR_LOCUS16729;ACOC_LOCUS36;Acey_s0211.g2215;ACOC_LOCUS37;OESDEN_14570;Acey_s0211.g2215;DICVIV_11676;OESDEN_07890;DICVIV_11676;DICVIV_13116;DICVIV_00593;DICVIV_00592;NECAME_12244;NECAME_12244;DICVIV_00594;Acey_s0012.g1860;OESDEN_14570;DICVIV_11676;DICVIV_00593;Acey_s0012.g1857;Acey_s0211.g2215;DICVIV_00592;HPLM_LOCUS12260;NECAME_1…	GO:0055085-IEA;GO:0016020-IEA;GO:0016021-IEA;GO:0015293-IEA	transmembrane transport-IEA;membrane-IEA;integral component of membrane-IEA;symporter activity-IEA	1	GO:0016021	integral component of membrane	-	-	-	DOMAIN;DOMAIN;DOMAIN;DOMAIN	Palmitoyltransferase, DHHC domain;Palmitoyltransferase, DHHC domain;Palmitoyltransferase, DHHC domain;Palmitoyltransferase, DHHC domain	mobidb-lite (MOBIDB_LITE);mobidb-lite (MOBIDB_LITE);mobidb-lite (MOBIDB_LITE);mobidb-lite (MOBIDB_LITE)	;
transcript_ACOC_0000003801-mRNA-1	putative dTDP-glucose 4,6-dehydratase	MVENLAEPKCVLITGGCGFIGSNFINFISDRWKSTRIVNYDKLAFGASPNHVEKRIRDSDRYMFFEARLEDQDILTMCLNDHHVDMVIHFAAVTHVDESYTDRIGTIRDNIISTTSLLECVVNRNYKGVRRLVHISTDEVYGDSFGDITPKTENSLLNPTNPYAASKAACEMIIRSYGHSYRLPYVIVRMNNVYGPRQACTKLIPKFTKLALEGKPYPLMGDGLHKRSWMYVEDCSEAIKRVAESGQLGEVYNIGTDFEITNVDLTRKIHSIVNKLKKRGESSPSFIPIPDRPYHDRQYYIDFSKIKNAMDWQCTTPFDDGLLATINYYVKQNKQGIVTSRLHG	344	20	0	0.9021	WR25_09504;SVUK_LOCUS10228;ACOC_LOCUS39;Acey_s0021.g265;Cni-F53B1.4;HPBE_LOCUS6312;CBG14085;NBR_LOCUS6691;CAEBREN_25184;HPLM_LOCUS11110;NECAME_01573;CRE_00931;CELE_F53B1.4;ANCDUO_02061;Acey_s0021.g265;Acey_s0021.g265;WR25_09504;ANCDUO_02061;CELE_F53B1.4;TELCIR_09502;ACOC_LOCUS39;CELE_F53B1.4;FL83_00932;CBG14085;SVUK_LOCUS10228;WR25_13513;Cni-F53B1.4;CBG14085;CAEBREN_25184;HPBE_LOCUS6312;Acey_s002…	GO:0008460-IBA;GO:0008460-IEA;GO:0030968-N/A;GO:0009225-IEA	dTDP-glucose 4,6-dehydratase activity-IBA;dTDP-glucose 4,6-dehydratase activity-IEA;endoplasmic reticulum unfolded protein response-N/A;nucleotide-sugar metabolic process-IEA	2	GO:0008460;GO:0009225	dTDP-glucose 4,6-dehydratase activity;nucleotide-sugar metabolic process	EC:4.2.1.46	dTDP-glucose 4,6-dehydratase	IPR016040;IPR005888;IPR036291	HOMOLOGOUS_SUPERFAMILY;HOMOLOGOUS_SUPERFAMILY;DOMAIN;DOMAIN;DOMAIN;FAMILY;HOMOLOGOUS_SUPERFAMILY	Armadillo-type fold;Armadillo-type fold;NAD(P)-binding domain;NAD(P)-binding domain;NAD(P)-binding domain;dTDP-glucose 4,6-dehydratase;NAD(P)-binding domain superfamily	G3DSA:3.90.25.10 (GENE3D);G3DSA:3.40.50.720 (GENE3D);PF16363 (PFAM);PTHR43000 (PANTHER);PTHR43000:SF6 (PANTHER);cd05246 (CDD);SSF51735 (SUPERFAMILY)	;nucleotide-sugar metabolic process/dTDP-glucose 4,6-dehydratase activity;
MSTRG.34.1	metallo-beta-lactamase domain protein	MLMPFILLTLFTASFTNYEKYLLTEEIVRSLDDWERALLRDFVRGKGHGSVSRIPVELFNEQSTDLEDAEENNFVALMNPPESSIRAGPMLTLPREALRMTSISSSTNKKFNTPRTSIRNSKEERRVSSVIMPASKIKRKPVAMPNTTSRKRNKSSLDEPTQQTFKELSNLLQAFIDRRKPLLQKVDISIASTLPSTSPSSPPPHSLLPSTPSRIVTRDENVDETSLKTYAMDKWEPMDPSDDRGSDEGNDHEPHEDWESRMRELSGQLSNILMQIKKARENHSMKHMTTTEKPRPKLTILRNGSANQTNDGYYNFVASITLVEDNGKNILVDTGLGTDINGRMELLKALQKQNIAPPNIDIVVTTHGHPDHAGGVHDFPDAIHYQGWYIHHHTIFNLS…	514	20	0	0.7774	NBR_LOCUS6690;NBR_LOCUS6690;NBR_LOCUS6690;NBR_LOCUS6690;NBR_LOCUS6690;NBR_LOCUS6690;NBR_LOCUS6690	GO:0000166-IEA;GO:0005525-IEA;GO:0007165-IEA;GO:0003924-IEA;GO:0007186-IEA;GO:0019001-IEA;GO:0031683-IEA	nucleotide binding-IEA;GTP binding-IEA;signal transduction-IEA;GTPase activity-IEA;G protein-coupled receptor signaling pathway-IEA;guanyl nucleotide binding-IEA;G-protein beta/gamma-subunit complex binding-IEA	2	GO:0007165;GO:0019001	signal transduction;guanyl nucleotide binding	-	-	IPR001279;IPR036866;IPR039344;IPR036866	DOMAIN;HOMOLOGOUS_SUPERFAMILY;HOMOLOGOUS_SUPERFAMILY;HOMOLOGOUS_SUPERFAMILY;HOMOLOGOUS_SUPERFAMILY;HOMOLOGOUS_SUPERFAMILY;FAMILY;FAMILY;HOMOLOGOUS_SUPERFAMILY	Metallo-beta-lactamase;Ribonuclease Z/Hydroxyacylglutathione hydrolase-like;Ribonuclease Z/Hydroxyacylglutathione hydrolase-like;Ribonuclease Z/Hydroxyacylglutathione hydrolase-like;Ribonuclease Z/Hydroxyacylglutathione hydrolase-like;Ribonuclease Z/Hydroxyacylglutathione hydrolase-like;Metallo-beta-lactamase domain-containing protein 1;Metallo-beta-lactamase domain-containing protein 1;Ribonucle…	PF00753 (PFAM);G3DSA:3.60.15.10 (GENE3D);mobidb-lite (MOBIDB_LITE);mobidb-lite (MOBIDB_LITE);mobidb-lite (MOBIDB_LITE);PTHR23200:SF48 (PANTHER);PTHR23200 (PANTHER);cd07711 (CDD);SSF56281 (SUPERFAMILY)	;
MSTRG.35.1	nucleoside transporter	MTAKTNSDPCQSERLPLDENTAFIQDDHDKNAPKDVGNLVYFIIMLHGVGTLMPWNMFITIAPDYYTNYKMKTFDENGTAHSTVYSANFLSYLAIASQIPNLLLNFINIFVTVKGDLTKRISYSLLIVGSMIVFTMSFVYVDTWSWMSGFFVITLASIVILNGANGVYQNSIFGLASDFPFKFTNTVIIGNNLCGTFVTVISIITTIISNNTANAAFAYFATSLFTIFVCFVSFFLLKKQPFYQHYSKRAMAAQQSDGDDLIPSATSRDYIDALKQGWPQMMNVYLVFFVSLTIFPGIMVDVHDELVGQKYSFVIPEKFFVPITCFLLFNVFAFVGSMLAGRFQYPGPVHLWKVVYTRLLFIPFFAFCNYRPLTRKLPVFFTNTWLYIFMAIIMSVSSG…	449	20	0	0.8006	ACOC_LOCUS41;ent-2;Acey_s0209.g2097;TELCIR_00830;FL83_01805;TELCIR_00830;TELCIR_00830;Acey_s0209.g2097;ANCCAN_14584;DICVIV_12815;Cre-ent-2;HPLM_LOCUS7400;ent-1;WR25_05465;OESDEN_00483;ent-2;NECAME_01543;WR25_05465;WR25_05465;Cnig_chr_III.g8388;ent-2;DICVIV_12815;Cre-ent-2;ent-2;Cre-ent-2;CBG15231;CBG15231;HPBE_LOCUS6121;ANCCAN_14584;CBG15231;ent-2;ent-1;ANCCAN_14584;ent-1;ent-2;Acey_s0209.g2097;H…	GO:0016020-IEA;GO:0016021-IBA;GO:0016021-IEA;GO:1901642-IEA;GO:0005337-IBA;GO:0005337-IEA;GO:0005886-IDA;GO:0005886-IBA	membrane-IEA;integral component of membrane-IBA;integral component of membrane-IEA;nucleoside transmembrane transport-IEA;nucleoside transmembrane transporter activity-IBA;nucleoside transmembrane transporter activity-IEA;plasma membrane-IDA;plasma membrane-IBA	4	GO:0005337;GO:0005886;GO:0016021;GO:1901642	nucleoside transmembrane transporter activity;plasma membrane;integral component of membrane;nucleoside transmembrane transport	-	-	IPR002259;IPR002259;IPR002259;IPR002259;IPR036259	FAMILY;FAMILY;FAMILY;FAMILY;FAMILY;HOMOLOGOUS_SUPERFAMILY	Equilibrative nucleoside transporter;Equilibrative nucleoside transporter;Equilibrative nucleoside transporter;Equilibrative nucleoside transporter;Equilibrative nucleoside transporter;MFS transporter superfamily	PR01130 (PRINTS);PIRSF016379 (PIRSF);PF01733 (PFAM);PTHR10332:SF23 (PANTHER);PTHR10332 (PANTHER);SSF103473 (SUPERFAMILY)	integral component of membrane/nucleoside transmembrane transporter activity/nucleoside transmembrane transport;integral component of membrane/nucleoside transmembrane transporter activity/nucleoside transmembrane transport;integral component of membrane/nucleoside transmembrane transporter activity/nucleoside transmembrane transport;integral component of membrane/nucleoside transmembrane transpo…
transcript_ACOC_0000004101-mRNA-1	Ras family protein	MSGAPYNYSYIFKYIIIGDMGVGKSCLLHQFTEKKFMADCPHTIGVEFGTRIIEVSGQKIKLQIWDTAGQERFRAVTRSYYRGAAGALMVYDITRRSTYNHLSSWLTDARNLTNPNTAIFLIGNKSDLDGQRDVPYEEAKAFAEENGLTFLECSAKTGDNVEDAFLETARKIYQNVKDGSIDLNAADTGVQPKQILPRAAANAGQEKKDCNC	212	20	2.3e-159	0.9618	ACOC_LOCUS42;Cre-rab-14;DICVIV_12816;HPBE_LOCUS22597;HPLM_LOCUS7401;rab-14;rab-14;ANCCAN_14585;NBR_LOCUS5700;Cni-rab-14;NBR_LOCUS5700;ACOC_LOCUS42;WBA_LOCUS1937;rab-14;WR25_08753;ANCDUO_09560;Cre-rab-14;rab-14;NLS_LOCUS9218;FL83_01806;rab-14;rab-14;Bma-rab-14;WBA_LOCUS1937;rab-14;rab-14;bma-rab-14;HPBE_LOCUS22597;bma-rab-14;Cbn-rab-14;PRIPAC_30218;NECAME_01544;NLS_LOCUS9218;rab-14;FL83_01806;rab-…	GO:0005525-IEA;GO:0005769-IDA;GO:0005769-IBA;GO:0005769-IEA;GO:0005802-IDA;GO:0005802-IEA;GO:0003924-IBA;GO:0003924-IEA;GO:0005829-IEA;GO:0012505-IBA;GO:0032456-IEA;GO:0055037-IEA;GO:0090387-IBA;GO:0090387-IGI;GO:0090387-IMP;GO:0090387-IEA;GO:0006895-IBA;GO:0006895-IEA;GO:0045335-IDA;GO:0045335-IBA;GO:0045335-IEA;GO:0042742-IEA;GO:0090382-IEA;GO:0090390-IMP;GO:0090390-IGI;GO:0090390-IEA;GO:000688…	GTP binding-IEA;early endosome-IDA;early endosome-IBA;early endosome-IEA;trans-Golgi network-IDA;trans-Golgi network-IEA;GTPase activity-IBA;GTPase activity-IEA;cytosol-IEA;endomembrane system-IBA;endocytic recycling-IEA;recycling endosome-IEA;phagolysosome assembly involved in apoptotic cell clearance-IBA;phagolysosome assembly involved in apoptotic cell clearance-IGI;phagolysosome assembly invo…	13	GO:0003924;GO:0005525;GO:0005769;GO:0005802;GO:0005829;GO:0006886;GO:0006895;GO:0032456;GO:0042742;GO:0045335;GO:0055037;GO:0090387;GO:0090390	GTPase activity;GTP binding;early endosome;trans-Golgi network;cytosol;intracellular protein transport;Golgi to endosome transport;endocytic recycling;defense response to bacterium;phagocytic vesicle;recycling endosome;phagolysosome assembly involved in apoptotic cell clearance;phagosome acidification involved in apoptotic cell clearance	EC:3.6.1.15	Nucleoside-triphosphate phosphatase	IPR005225;IPR001806;IPR030702;IPR030702;IPR027417	HOMOLOGOUS_SUPERFAMILY;DOMAIN;FAMILY;FAMILY;FAMILY;FAMILY;FAMILY;FAMILY;HOMOLOGOUS_SUPERFAMILY	Protein kinase-like domain superfamily;Small GTP-binding protein domain;Small GTPase;Small GTPase;Ras-related protein Rab14;Ras-related protein Rab14;Ras-related protein Rab14;Ras-related protein Rab14;P-loop containing nucleoside triphosphate hydrolase	PR00449 (PRINTS);TIGR00231 (TIGRFAM);PF00071 (PFAM);G3DSA:3.40.50.300 (GENE3D);PTHR24073:SF1098 (PANTHER);PTHR24073 (PANTHER);PS51419 (PROSITE_PROFILES);cd04122 (CDD);SSF52540 (SUPERFAMILY)	;GTP binding;GTPase activity/GTP binding;GTPase activity/phagosome maturation/recycling endosome/endocytic recycling/defense response to bacterium/phagocytic vesicle/GTP binding/Golgi to endosome transport/trans-Golgi network;GTPase activity/phagosome maturation/recycling endosome/endocytic recycling/defense response to bacterium/phagocytic vesicle/GTP binding/Golgi to endosome transport/trans-Go…
transcript_ACOC_0000004201-mRNA-1	peptidase M16 inactive domain protein	MLGRFSSHALRRSLVSTVSRLKDLHSITRVPLCTPLEGEFAVKSQNAPRYVPFDSKLTTLESNIRVASEPHYGDYCTIGVAIESGSRYEAGYPLGTSHIVEKLAFGSSSGHSSRDEIYAVLQQNGGLIDCQSTRDTFIYAASCHVSGMDAIIEIIANAVWRPQNTPDELKEAKMIVQYEIEDMPKKIESVEPLVTDWLHKAAFRDNTLGFSKFTTETALPKITEKHVNSYMFQYHAPERLVVAGVGVDHADLVAAVERHFRSGSSTWEKNPDILLPKLPPVDLSIAQYSGGEVKAYCFIVPSLLSILKYVDKDLSTLAVGTPYPNLAHVALGFEGVSYRDSDFVAFCVLHMLLGGGGSFSAGGPGKGMYTRLYTDVMNRCHWIYGATAYNHSYADAGLF…	486	20	0	0.8252	BPAG_LOCUS12340;WR25_15440;NECAME_01524;SVUK_LOCUS9345;Bma-mppa-1;Acey_s0209.g2100;bma-mppa-1;DICVIV_12817;Acey_s0209.g2100;X798_08029;Acey_s0209.g2100;WR25_15440;DICVIV_12817;L596_019897;X798_08029;HPLM_LOCUS7402;HPLM_LOCUS9698;NLS_LOCUS8064;ACOC_LOCUS43;Acey_s0209.g2100;ACOC_LOCUS43;ANCCAN_14586;WR25_15440;Acey_s0209.g2100;Acey_s0209.g2100;SVUK_LOCUS9345;BPAG_LOCUS12340;HPLM_LOCUS9698;NECAME_01…	GO:0046872-IEA;GO:0003824-IEA;GO:0006508-IEA;GO:0017087-IEA;GO:0004222-IEA	metal ion binding-IEA;catalytic activity-IEA;proteolysis-IEA;mitochondrial processing peptidase complex-IEA;metalloendopeptidase activity-IEA	3	GO:0004222;GO:0006508;GO:0046872	metalloendopeptidase activity;proteolysis;metal ion binding	EC:3.4.24	Acting on peptide bonds (peptidases)	IPR011765;IPR007863;IPR011249;IPR011249	HOMOLOGOUS_SUPERFAMILY;DOMAIN;DOMAIN;DOMAIN;DOMAIN;DOMAIN;HOMOLOGOUS_SUPERFAMILY;HOMOLOGOUS_SUPERFAMILY	Protein kinase-like domain superfamily;Peptidase M16, N-terminal;Peptidase M16, N-terminal;Peptidase M16, C-terminal;Peptidase M16, C-terminal;Peptidase M16, C-terminal;Metalloenzyme, LuxS/M16 peptidase-like;Metalloenzyme, LuxS/M16 peptidase-like	G3DSA:3.30.830.10 (GENE3D);PF00675 (PFAM);G3DSA:3.30.830.10 (GENE3D);PF05193 (PFAM);PTHR11851:SF49 (PANTHER);PTHR11851 (PANTHER);SSF63411 (SUPERFAMILY);SSF63411 (SUPERFAMILY)	;catalytic activity/metal ion binding;catalytic activity/metal ion binding
MSTRG.37.1	peptidase M16 inactive domain protein	MLGRFSSHALRRSLVSTVSRLKDLHSITRVPLCTPLEGEFAVKSQNAPRYVPFDSKLTTLESNIRVASEPHYGDYCTIGVAIESGSRYEAGYPLGTSHIVEKLAFGSSSGHSSRDEIYAVLQQNGGLIDCQSTRDTFIYAASCHVSGMDAIIEIIANAVWRPQNTPDELKEAKMIVQYEIEDMPKKIESVEPLVTDWLHKAAFRDNTLGFSKFTTETALPKITEKHVNSYMFQYHAPERLVVAGVGVDHADLVAAVERHFRSGSSTWEKNPDILLPKLPPVDLSIAQYSGGEVKVDKDLSTLAVGTPYPNLAHVALGFEGVSYRDSDFVAFCVLHMLLGGGGSFSAGGPGKGMYTRLYTDVMNRCHWIYGATAYNHSYADAGLFCVHASSDPEQINDVL…	520	20	0	0.8451	BPAG_LOCUS12340;WR25_15440;NECAME_01524;SVUK_LOCUS9345;Bma-mppa-1;Acey_s0209.g2100;bma-mppa-1;DICVIV_12817;Acey_s0209.g2100;X798_08029;Acey_s0209.g2100;WR25_15440;DICVIV_12817;L596_019897;X798_08029;HPLM_LOCUS7402;HPLM_LOCUS9698;NLS_LOCUS8064;ACOC_LOCUS43;Acey_s0209.g2100;ACOC_LOCUS43;ANCCAN_14586;WR25_15440;Acey_s0209.g2100;Acey_s0209.g2100;SVUK_LOCUS9345;BPAG_LOCUS12340;HPLM_LOCUS9698;NECAME_01…	GO:0046872-IEA;GO:0003824-IEA;GO:0006508-IEA;GO:0017087-IEA;GO:0004222-IEA	metal ion binding-IEA;catalytic activity-IEA;proteolysis-IEA;mitochondrial processing peptidase complex-IEA;metalloendopeptidase activity-IEA	3	GO:0004222;GO:0006508;GO:0046872	metalloendopeptidase activity;proteolysis;metal ion binding	EC:3.4.24	Acting on peptide bonds (peptidases)	IPR007863;IPR011765;IPR011249;IPR011249	DOMAIN;DOMAIN;DOMAIN;DOMAIN;DOMAIN;DOMAIN;HOMOLOGOUS_SUPERFAMILY;HOMOLOGOUS_SUPERFAMILY	ShKT domain;Peptidase M16, C-terminal;Peptidase M16, N-terminal;Peptidase M16, N-terminal;Peptidase M16, N-terminal;Peptidase M16, N-terminal;Metalloenzyme, LuxS/M16 peptidase-like;Metalloenzyme, LuxS/M16 peptidase-like	G3DSA:3.30.830.10 (GENE3D);PF05193 (PFAM);PF00675 (PFAM);G3DSA:3.30.830.10 (GENE3D);PTHR11851 (PANTHER);PTHR11851:SF49 (PANTHER);SSF63411 (SUPERFAMILY);SSF63411 (SUPERFAMILY)	;catalytic activity/metal ion binding;catalytic activity/metal ion binding
MSTRG.38.1	homeobox domain protein	MSEQVSQSTTEKFEPSNIFGQKSNEFTNIMNMAQLVMRPDMTKQLEQFQAQFGATSPLLVKPTVPFDSPFAIASLTKADNKEEQREEKPVMLDAAPSVSEQRDSLNISDDGGESPDENGKRKQRRYRTTFSAYQLDELEKVFARTHYPDVFTREELAQRVTLTEARVQVWFQNRRAKFRKQERCNHHPYPHPTPISDLPYPMMLNQELMAVMNQHTINHVAQAAAESLLMTPSAMLAAAVARRPQSPMVSSAVSTTTPTIPSAVAMPFATPLMQQDMLNMVMASIPQTQQLMYLQHMSRLNEMCKQLTPTSTATATVAATAAVAAAAGVASANRVTSPATSSPVTVVTTTSPTTSSSSANFSDLSTLINSPTKNE	375	20	0	0.7903	SVUK_LOCUS9762;alr-1;NECAME_01523;ACOC_LOCUS44;NECAME_01523;Acey_s0209.g2101;alr-1;alr-1;CGOC_LOCUS3233;DICVIV_12818;SVUK_LOCUS9762;ANCDUO_09759;NECAME_01523;ACOC_LOCUS44;Acey_s0209.g2101;Acey_s0209.g2101;ACOC_LOCUS44;DICVIV_12818;FL82_00466;DICVIV_12818;alr-1;FL83_01179;Cre-alr-1;FL83_01179;alr-1;GCK72_023722;NECAME_01523;Cre-alr-1;GCK72_023722;DICVIV_12818;alr-1;alr-1;ACOC_LOCUS44;alr-1;alr-1;C…	GO:0003677-IEA;GO:0000981-IBA;GO:0000981-IEA;GO:0006355-IEA;GO:0000977-IDA;GO:0000977-IBA;GO:0000977-IEA;GO:0005634-IDA;GO:0005634-IBA;GO:0005634-IEA;GO:0006357-IEA	DNA binding-IEA;DNA-binding transcription factor activity, RNA polymerase II-specific-IBA;DNA-binding transcription factor activity, RNA polymerase II-specific-IEA;regulation of transcription, DNA-templated-IEA;RNA polymerase II transcription regulatory region sequence-specific DNA binding-IDA;RNA polymerase II transcription regulatory region sequence-specific DNA binding-IBA;RNA polymerase II tr…	4	GO:0000977;GO:0000981;GO:0005634;GO:0006357	RNA polymerase II transcription regulatory region sequence-specific DNA binding;DNA-binding transcription factor activity, RNA polymerase II-specific;nucleus;regulation of transcription by RNA polymerase II	-	-	IPR001356;IPR001356;IPR001356;IPR009057	DOMAIN;DOMAIN;DOMAIN;DOMAIN;DOMAIN;DOMAIN;DOMAIN;DOMAIN;DOMAIN;HOMOLOGOUS_SUPERFAMILY	Homeobox domain;Homeobox domain;Homeobox domain;Homeobox domain;Homeobox domain;Homeobox domain;Homeobox domain;Homeobox domain;Homeobox domain;Homeobox-like domain superfamily	PF00046 (PFAM);G3DSA:1.10.10.60 (GENE3D);mobidb-lite (MOBIDB_LITE);mobidb-lite (MOBIDB_LITE);mobidb-lite (MOBIDB_LITE);PTHR24329 (PANTHER);PTHR24329:SF521 (PANTHER);PS50071 (PROSITE_PROFILES);cd00086 (CDD);SSF46689 (SUPERFAMILY)	DNA binding;DNA binding;DNA binding;
MSTRG.39.1	remodeling and spacing factor 1	MDRKYLFAFGDISIVGDSKPCGKSMSGNDLGSKSSPKALKSSETIEPERKAAADRFRREMEYIGVSLNNIIPSTLKQTAMESSSSSSSEDGQRRSKKKAVKKITPNVRRVPMHVQTVAEGRSRRSVKKVDYKFSEFDSVIKEACRMNESPPPDAVKEVARPQGGAGRGKDMANIIEAQKQQEEGAPRASAGVPPRRFPKHRRRLNDLNDLDESDSDSEEYKANESEEDAEEDDQSSDYVPSETEFRLRRIGGGRKAFARTQSDDDFIVSGSEDSYESPRRKKPNKKEKSRRRARWQSDSESGEDMEEDETYSDDSRGKKKVNRRRSVVSSDETSDEADDTLAPDTVDDIVDGPKTRTGRPLRKAVTKSKTAFLDNSEDEEADANEDTENGLGKQENPRK…	698	20	0	0.6938	HPBE_LOCUS4189;NLS_LOCUS2986;NECAME_01522;ACOC_LOCUS45;NECAME_01522;LOAG_02238;HPBE_LOCUS4189;LOAG_02238;DICVIV_13225;ACOC_LOCUS45;X798_06174;NLS_LOCUS2986;NECAME_01522;NAV_LOCUS3195;ACOC_LOCUS45;WR25_11640;WR25_14384;NOO_LOCUS2238;WR25_11640;Acey_s0209.g2102;Acey_s0209.g2102;NOO_LOCUS2238;NOO_LOCUS2238;Acey_s0209.g2102;DICVIV_13225;NAV_LOCUS3195;X798_06174;DICVIV_13225;LOAG_02238;X798_06174;WR25…	GO:0046872-IEA;GO:0006355-IEA;GO:0031213-IEA	metal ion binding-IEA;regulation of transcription, DNA-templated-IEA;RSF complex-IEA	3	GO:0006355;GO:0031213;GO:0046872	regulation of transcription, DNA-templated;RSF complex;metal ion binding	-	-	-	FAMILY;FAMILY;FAMILY;FAMILY;FAMILY;FAMILY;FAMILY;FAMILY;FAMILY;FAMILY;FAMILY;FAMILY;FAMILY	Epithelial sodium channel;Epithelial sodium channel;Epithelial sodium channel;Epithelial sodium channel;Epithelial sodium channel;Epithelial sodium channel;Epithelial sodium channel;Epithelial sodium channel;Epithelial sodium channel;Epithelial sodium channel;Epithelial sodium channel;Epithelial sodium channel;Epithelial sodium channel	mobidb-lite (MOBIDB_LITE);mobidb-lite (MOBIDB_LITE);mobidb-lite (MOBIDB_LITE);mobidb-lite (MOBIDB_LITE);mobidb-lite (MOBIDB_LITE);mobidb-lite (MOBIDB_LITE);mobidb-lite (MOBIDB_LITE);mobidb-lite (MOBIDB_LITE);mobidb-lite (MOBIDB_LITE);mobidb-lite (MOBIDB_LITE);mobidb-lite (MOBIDB_LITE);mobidb-lite (MOBIDB_LITE);mobidb-lite (MOBIDB_LITE)	;
MSTRG.39.2	PHD-finger family protein	MNLSTEDSSGTAVQRTTQEHDQPTATESTSVINNQTATTSHESDARLVHIEDHLSAEVHPNEKRTINDNKMVAENTRGSYSVIKSESHDEACKLIESGVEISTNSLTITSHVADDESTTGSFGTTVDDVDATTMDDEDASEIEQPRSSTDVLRKPSTAPQIDAEQLRCDPDFAVICSFINKFFTLMRMEPVSFCQLENMFTKLEDGRVSKELVDLHLKLLRRSIVKTVSNDSFEKCILKYLTSTGLLPSEKRQLETYGYVHMSILSKLKILRTLCELQLDHNARLKESIPLALRALDMRDVVTGVDKCGLAYYCQIDSVFDLRLYTTEQDDESGYSWTLVARDMSDLERLIAKLKSEDLGYVKNPNDKREFNKGFDGDAENVVNMVTKKGTYVDMFLDE…	1293	20	0	0.6739	NECAME_01522;HPBE_LOCUS4189;LOAG_02238;DICVIV_13225;BM_Bm8325;X798_06174;Bm8325;NLS_LOCUS2986;Bm8325;NAV_LOCUS3195;ACOC_LOCUS45;BM_Bm8325;Bm8325;NAV_LOCUS3195;Bm8325;Bm8325;NAV_LOCUS3195;HPBE_LOCUS4189;NLS_LOCUS2986;NECAME_01522;ACOC_LOCUS45;LOAG_02238;ACOC_LOCUS45;Acey_s0209.g2103;BPAG_LOCUS12535;Bm8325;OESDEN_01870;Acey_s0209.g2103;NECAME_01522;BPAG_LOCUS12535;Acey_s0209.g2103;BM_Bm8325;WR25_14…	GO:0046872-IEA;GO:0006355-IEA;GO:0031213-IEA	metal ion binding-IEA;regulation of transcription, DNA-templated-IEA;RSF complex-IEA	3	GO:0006355;GO:0031213;GO:0046872	regulation of transcription, DNA-templated;RSF complex;metal ion binding	-	-	IPR028942;IPR019787;IPR028938;IPR019787;IPR011011	DOMAIN;DOMAIN;DOMAIN;DOMAIN;DOMAIN;DOMAIN;DOMAIN;DOMAIN;DOMAIN;DOMAIN;DOMAIN;DOMAIN;DOMAIN;DOMAIN;DOMAIN;DOMAIN;DOMAIN;DOMAIN;DOMAIN;FAMILY;DOMAIN;DOMAIN;HOMOLOGOUS_SUPERFAMILY	WHIM1 domain;Zinc finger, PHD-finger;Zinc finger, PHD-finger;Zinc finger, PHD-finger;Zinc finger, PHD-finger;Zinc finger, PHD-finger;Zinc finger, PHD-finger;Zinc finger, PHD-finger;Zinc finger, PHD-finger;Zinc finger, PHD-finger;Zinc finger, PHD-finger;Zinc finger, PHD-finger;Zinc finger, PHD-finger;Zinc finger, PHD-finger;Zinc finger, PHD-finger;Zinc finger, PHD-finger;Zinc finger, PHD-finger;Zi…	PF15612 (PFAM);PF00628 (PFAM);G3DSA:2.30.30.1150 (GENE3D);mobidb-lite (MOBIDB_LITE);mobidb-lite (MOBIDB_LITE);mobidb-lite (MOBIDB_LITE);mobidb-lite (MOBIDB_LITE);mobidb-lite (MOBIDB_LITE);mobidb-lite (MOBIDB_LITE);mobidb-lite (MOBIDB_LITE);mobidb-lite (MOBIDB_LITE);mobidb-lite (MOBIDB_LITE);mobidb-lite (MOBIDB_LITE);mobidb-lite (MOBIDB_LITE);mobidb-lite (MOBIDB_LITE);mobidb-lite (MOBIDB_LITE);mob…	;RSF complex/regulation of transcription, DNA-templated;
transcript_ACOC_0000004601-mRNA-1	FiLamiN (actin binding protein) homolog	MINAHGECATGSVQVNAISPSGRVQSCAVSKRANSYTASFTPQQVGEFATYFFGKRHVINVCLWKVGILYEGEHIRGSPFSCQVFDASLVQVYGLDIGLVGQELKFNINASEAGRGNLEVCFILLPYEFRE	131	20	8e-93	0.7993	Acey_s0209.g2104;DICVIV_13586;DICVIV_13586;FLNA;FLNA	GO:0003779-IEA;GO:0016020-IEA;GO:0016021-IEA	actin binding-IEA;membrane-IEA;integral component of membrane-IEA	2	GO:0003779;GO:0016020	actin binding;membrane	-	-	IPR013783;IPR013783;IPR017868;IPR014756	HOMOLOGOUS_SUPERFAMILY;HOMOLOGOUS_SUPERFAMILY;HOMOLOGOUS_SUPERFAMILY;HOMOLOGOUS_SUPERFAMILY;REPEAT;HOMOLOGOUS_SUPERFAMILY	Immunoglobulin-like fold;Immunoglobulin-like fold;Immunoglobulin-like fold;Immunoglobulin-like fold;Filamin/ABP280 repeat-like;Immunoglobulin E-set	G3DSA:2.60.40.10 (GENE3D);G3DSA:2.60.40.10 (GENE3D);PTHR38537 (PANTHER);PTHR38537:SF3 (PANTHER);PS50194 (PROSITE_PROFILES);SSF81296 (SUPERFAMILY)	;
transcript_ACOC_0000004901-mRNA-1	DB module	MCKASYFLLLLIITATTSLSLACFASGICGGGCPPPPPPVCGGGCGVGYSCGHYGCFRTRARAASSLTMSIETLAKKAATPDEKFMACCIERNLPDSCLNKCLFSTYTRAALQAMYFKQDSCPIQAATDIHYCAAQGKDHRDCCSRNGVATTLAGYKCMTFCDQRPGNVTQLDFTYLACYDRFENMKACFWHDVSRIDESEQSFSHDERPEMDLISSSRRSSLQAQLFAGGSNPPVRLSVPGSVRTLQAKIFH	253	20	0	0.7514	TCNE_LOCUS18767;TCNE_LOCUS18767	GO:0016020-IEA;GO:0016021-IEA	membrane-IEA;integral component of membrane-IEA	1	GO:0016020	membrane	-	-	IPR002602	DOMAIN;DOMAIN;DOMAIN;DOMAIN	Domain of unknown function DB;Domain of unknown function DB;Domain of unknown function DB;Domain of unknown function DB	PF01682 (PFAM);PTHR46705 (PANTHER);PTHR46705:SF4 (PANTHER);PS51257 (PROSITE_PROFILES)	;
MSTRG.43.1	barrier to autointegration factor	MIHTPTASPNRGERNTSELCETPRSRGRRVPRPTRLQGFTGRRREHLIQPDPELYYDRDGRPLHGAVRGVLVSLPDGTLRADIRPINTTYERMSPSSKLREFVNEPMRDKHVSSVAGIAHECSDTLVGLGFDKAYILFGQFLIYRKERSAFIEWLVATTGIGISNAIAAYDCLSEWSEKFL	181	20	5.8e-64	0.7312	baf-1;Cbn-baf-1;baf-1;CGOC_LOCUS12347;HPLM_LOCUS8864;Cre-baf-1;DICVIV_07293;baf-1;Cre-baf-1;baf-1;baf-1;Cbn-baf-1;baf-1;baf-1;ANCCEY_01192;baf-1;baf-1;TCNE_LOCUS8913;ACOC_LOCUS52;baf-1;baf-1;baf-1;Cbn-baf-1;baf-1;NOO_LOCUS11116;baf-1;baf-1;baf-1;baf-1;Cni-baf-1;baf-1;baf-1;NLS_LOCUS2130;Cre-baf-1;ANCCAN_24735;baf-1;WBA_LOCUS2551;baf-1;baf-1;baf-1;Cbn-baf-1;baf-1;bma-baf-1;Cbn-baf-1;baf-1;baf-1;Cr…	GO:0003677-IBA;GO:0003677-IEA;GO:0005515-IPI;GO:0000793-IDA;GO:0000793-IEA;GO:0005635-IDA;GO:0005635-IEA;GO:0005737-IDA;GO:0005737-IEA;GO:0051276-IMP;GO:0051276-IEA;GO:0006281-IEA;GO:0042802-ISS;GO:0010165-IGI;GO:0010165-IMP;GO:0010165-IEA;GO:0030261-IBA;GO:0009792-IGI;GO:0009792-IMP;GO:0009792-IEA;GO:0003690-ISS;GO:0007059-IBA;GO:0007059-IMP;GO:0007059-IEA;GO:0000779-IDA;GO:0000779-IEA;GO:000565…	DNA binding-IBA;DNA binding-IEA;protein binding-IPI;condensed chromosome-IDA;condensed chromosome-IEA;nuclear envelope-IDA;nuclear envelope-IEA;cytoplasm-IDA;cytoplasm-IEA;chromosome organization-IMP;chromosome organization-IEA;DNA repair-IEA;identical protein binding-ISS;response to X-ray-IGI;response to X-ray-IMP;response to X-ray-IEA;chromosome condensation-IBA;embryo development ending in bir…	10	GO:0000779;GO:0003677;GO:0005515;GO:0005635;GO:0005654;GO:0005737;GO:0007059;GO:0009792;GO:0010165;GO:0030261	condensed chromosome, centromeric region;DNA binding;protein binding;nuclear envelope;nucleoplasm;cytoplasm;chromosome segregation;embryo development ending in birth or egg hatching;response to X-ray;chromosome condensation	-	-	IPR036617;IPR004122;IPR036617	HOMOLOGOUS_SUPERFAMILY;FAMILY;FAMILY;FAMILY;FAMILY;HOMOLOGOUS_SUPERFAMILY	Barrier-to-autointegration factor, BAF superfamily;Barrier- to-autointegration factor, BAF;Barrier- to-autointegration factor, BAF;Barrier- to-autointegration factor, BAF;Barrier- to-autointegration factor, BAF;Barrier-to-autointegration factor, BAF superfamily	G3DSA:1.10.150.40 (GENE3D);PF02961 (PFAM);mobidb-lite (MOBIDB_LITE);mobidb-lite (MOBIDB_LITE);PTHR47507 (PANTHER);SSF47798 (SUPERFAMILY)	DNA binding;DNA binding;DNA binding
MSTRG.44.1	ribosomal protein S6e	MLFYALMKLRQRYKEETRGSRRGEEDSGDQDVEGVTDNVLPCGLRPKRAAKIGKLLKFSKEDDAKKYVTANEETRSEYWILFLVPFSNVVVYNFQNYHREREYLGKPPSVNAQEQRSNSSDEGAAYYKLMTTLGKVASTKADTSPA	146	20	1.3e-15	0.5573	PRIPAC_43764;PRIPAC_43764;SVUK_LOCUS19972;HPLM_LOCUS6303;DICVIV_08875;ANCDUO_05628;SVUK_LOCUS21041;CGOC_LOCUS12506;ANCCEY_10161;DICVIV_08875;NECAME_13190;ANCDUO_05628;OESDEN_07650;NBR_LOCUS12423;SVUK_LOCUS21041;ANCCAN_08490;HPBE_LOCUS13233;ANCCEY_10161;TELCIR_26153;CGOC_LOCUS12506;Acey_s0043.g888;ACOC_LOCUS8808;Cre-rps-6;PRIPAC_43764;NECAME_13190;HPBE_LOCUS13233;Acey_s0043.g888;OESDEN_07650;ANCDU…	GO:0003735-IEA;GO:0016020-IEA;GO:0016021-IEA;GO:0005840-IEA;GO:0016787-IEA;GO:0006412-IEA	structural constituent of ribosome-IEA;membrane-IEA;integral component of membrane-IEA;ribosome-IEA;hydrolase activity-IEA;translation-IEA	1	GO:0016020	membrane	-	-	-	FAMILY	E3 ubiquitin ligase RBR family	mobidb-lite (MOBIDB_LITE)	-
MSTRG.45.1	putative phage head-tail adaptor	MRDVLVTSTKKMTDYNLLSEVTDVKSLCTEVSDIMTKTQMTQLLQVLAVLSTIVGDGTLKVQLLHMAAEPAIRYVHSVESLEFGLVNSKLNLQ	93	11	1.8e-18	0.7161	HPLM_LOCUS12807;Acey_s0095.g2837;OESDEN_01978;Acey_s0095.g2837;NBR_LOCUS16915;Acey_s0095.g2837;ACOC_LOCUS7591;Acey_s0095.g2837;OESDEN_01978;OESDEN_01978;TELCIR_02845;OESDEN_01978;ANCCAN_12080;TELCIR_02845;ACOC_LOCUS7591;DICVIV_09890	GO:0051168-IEA;GO:0005634-IEA;GO:0008536-IEA;GO:0006886-IEA	nuclear export-IEA;nucleus-IEA;Ran GTPase binding-IEA;intracellular protein transport-IEA	2	GO:0005634;GO:0051168	nucleus;nuclear export	-	-	-	-	-	-	-
MSTRG.45.2	putative phage head-tail adaptor	MRDVLVTSTKKMTDYNLLSEEQVTDVKSLCTEVSDIMTKTQMTQLLQVLAVLSTIVGDGTLKVQLLHMAAEPAIRYVHSVESLEFGLVNSKLNLQ	95	11	9e-20	0.7116	HPLM_LOCUS12807;Acey_s0095.g2837;OESDEN_01978;Acey_s0095.g2837;NBR_LOCUS16915;Acey_s0095.g2837;ACOC_LOCUS7591;Acey_s0095.g2837;OESDEN_01978;OESDEN_01978;TELCIR_02845;OESDEN_01978;ANCCAN_12080;TELCIR_02845;ACOC_LOCUS7591;DICVIV_09890	GO:0051168-IEA;GO:0005634-IEA;GO:0008536-IEA;GO:0006886-IEA	nuclear export-IEA;nucleus-IEA;Ran GTPase binding-IEA;intracellular protein transport-IEA	2	GO:0005634;GO:0051168	nucleus;nuclear export	-	-	-	-	-	-	-
transcript_ACOC_0000005201-mRNA-1	unnamed protein product	MNGCLCQTRVNENDDAFDSSTVACSEEHFFSDVIDGVESVGSSLLGLSDDACLILFALMNKSSIEKLHACAGEL	74	16	1.1e-45	0.6848	ACOC_LOCUS9437;ACOC_LOCUS3902;ACOC_LOCUS13028;ACOC_LOCUS9437;ACOC_LOCUS8474;ACOC_LOCUS13028;ACOC_LOCUS13028;ACOC_LOCUS3902;ACOC_LOCUS13028;ACOC_LOCUS8474;ACOC_LOCUS9722;ACOC_LOCUS9722	GO:0003677-IEA;GO:0016020-IEA;GO:0016021-IEA;GO:0007186-IEA;GO:0042025-IEA;GO:0004930-IEA	DNA binding-IEA;membrane-IEA;integral component of membrane-IEA;G protein-coupled receptor signaling pathway-IEA;host cell nucleus-IEA;G protein-coupled receptor activity-IEA	1	GO:0016020	membrane	-	-	-	-	-	-	-
MSTRG.46.2	putative phosphoglycerate dehydrogenase	MPTTCGFPNCKFRSRYRGQEDNRHFYRIPKRPQVLRQRWLSAIGRTEETVVSQLRICSAHFEGGEKKEGDIPVPDPTVDKQLNIELPPKETKGSERKRNKGSPPVSRPLIVRKRQIPDFLRNPLDNSPLSVAAAAASAEPTPVLPVERPQNIHGIIAMSSARNMNGPAGARPLVALLDGRDCTIEMPLLKDVATVAFCDAQSTHEIHEKVLNEAVAALMYHSIKLEKEDLEKFKALRVVVKIGYGFDNIDVKAATELGIAVCHTPGYCIEEIADFTISLILNLYRRTYWLAKAVSEGKKVVGAEHVREVAGGSRRMRGDILGIIGMGRVGTAVALRARSFGMNIVFYDPFVPDGYENALGVERCYALDDLLMKSDAISLHCLLTDETRHIINEQTLKQC…	684	20	0	0.854	DME_LOCUS9828;GCK72_024483;Acey_s0028.g1730;SVUK_LOCUS10609;bma-ctbp-1;NECAME_01801;ctbp-1;HPBE_LOCUS5796;NBR_LOCUS6881;ANCCEY_01552;FL83_00450;WR25_16236;ANCCEY_01552;Acey_s0028.g1730;Cre-ctbp-1;SVUK_LOCUS10609;ctbp-1;Bma-ctbp-1;Acey_s0028.g1730;Cre-ctbp-1;GCK72_024483;DICVIV_08431;NECAME_01801;FL82_01799;HPBE_LOCUS5796;FL82_01799;ctbp-1;Bma-ctbp-1;FL81_02459;NBR_LOCUS6881;NECAME_01801;DME_LOCUS…	GO:0003677-IEA;GO:0016616-IEA;GO:0003714-IEA;GO:0051287-IEA;GO:0016491-IEA;GO:0046872-IEA;GO:0055114-IEA;GO:1903507-IEA;GO:0005634-IDA;GO:0005634-IEA;GO:0003676-IEA	DNA binding-IEA;oxidoreductase activity, acting on the CH-OH group of donors, NAD or NADP as acceptor-IEA;transcription corepressor activity-IEA;NAD binding-IEA;oxidoreductase activity-IEA;metal ion binding-IEA;oxidation-reduction process-IEA;negative regulation of nucleic acid-templated transcription-IEA;nucleus-IDA;nucleus-IEA;nucleic acid binding-IEA	7	GO:0003677;GO:0003714;GO:0005634;GO:0016616;GO:0051287;GO:0055114;GO:1903507	DNA binding;transcription corepressor activity;nucleus;oxidoreductase activity, acting on the CH-OH group of donors, NAD or NADP as acceptor;NAD binding;oxidation-reduction process;negative regulation of nucleic acid-templated transcription	-	-	IPR006139;IPR038441;IPR006612;IPR006140;IPR006612;IPR043322;IPR036291	DOMAIN;DOMAIN;DOMAIN;HOMOLOGOUS_SUPERFAMILY;DOMAIN;DOMAIN;DOMAIN;DOMAIN;DOMAIN;DOMAIN;DOMAIN;DOMAIN;DOMAIN;FAMILY;FAMILY;HOMOLOGOUS_SUPERFAMILY;HOMOLOGOUS_SUPERFAMILY	D-isomer specific 2-hydroxyacid dehydrogenase, catalytic domain;D-isomer specific 2-hydroxyacid dehydrogenase, catalytic domain;D-isomer specific 2-hydroxyacid dehydrogenase, catalytic domain;THAP-type zinc finger superfamily;THAP-type zinc finger;D-isomer specific 2-hydroxyacid dehydrogenase, NAD-binding domain;D-isomer specific 2-hydroxyacid dehydrogenase, NAD-binding domain;D-isomer specific 2…	PF00389 (PFAM);G3DSA:3.40.50.720 (GENE3D);G3DSA:3.40.50.720 (GENE3D);G3DSA:3.30.40.180 (GENE3D);PF05485 (PFAM);PF02826 (PFAM);mobidb-lite (MOBIDB_LITE);mobidb-lite (MOBIDB_LITE);mobidb-lite (MOBIDB_LITE);mobidb-lite (MOBIDB_LITE);PTHR46029 (PANTHER);PTHR46029:SF7 (PANTHER);PS50950 (PROSITE_PROFILES);cd05299 (CDD);SSF52283 (SUPERFAMILY);SSF51735 (SUPERFAMILY);SSF57716 (SUPERFAMILY)	oxidation-reduction process/oxidoreductase activity, acting on the CH-OH group of donors, NAD or NADP as acceptor/NAD binding;nucleic acid binding;oxidation-reduction process/NAD binding;nucleic acid binding;transcription corepressor activity/oxidoreductase activity, acting on the CH-OH group of donors, NAD or NADP as acceptor/NAD binding;
transcript_ACOC_0000005401-mRNA-1	putative phosphoglycerate dehydrogenase	MIYYCYYYDNSPLSVAAAAASAEPTPVLPVERPQNIHGIIAMSSARNMNGPAGARPLVALLDGRDCTIEMPLLKDVATVAFCDAQSTHEIHEKVLNEAVAALMYHSIKLEKEDLEKFKALRVVVKIGYGFDNIDVKAATELGIAVCHTPGYCIEEIADFTISLILNLYRRTYWLAKAVSEGKKVVGAEHVREVAGGSRRMRGDILGIIGMGRVGTAVALRARSFGMNIVFYDPFVPDGYENALGVERCYALDDLLMKSDAISLHCLLTDETRHIINEQTLKQCRPGADLATFLKSGHVRGAALDVHEQEPYEGNIMNPLSQCPNVIHTPHASWFSDSSCKELRVNAAKEVRRAILNRFPNDLLNCVNKDQLLANGGGARRALAAAAAAAANQPGPSSYN…	567	20	0	0.8315	Bma-ctbp-1;X798_04555;bma-ctbp-1;LOAG_17339;SVUK_LOCUS10609;Acey_s0028.g1730;bma-ctbp-1;bma-ctbp-1;X798_04555;NECAME_01801;ASIM_LOCUS13089;HPBE_LOCUS5796;ASIM_LOCUS13089;ASIM_LOCUS13089;NBR_LOCUS6881;ANCCEY_01552;WUBG_05864;bma-ctbp-1;WR25_16236;ANCCEY_01552;Acey_s0028.g1730;bma-ctbp-1;SVUK_LOCUS10609;Bma-ctbp-1;Bma-ctbp-1;Acey_s0028.g1730;DICVIV_08431;LOAG_17339;NECAME_01801;HPBE_LOCUS5796;Bma-c…	GO:0003677-IEA;GO:0016616-IEA;GO:0051287-IEA;GO:0003714-IEA;GO:0016491-IEA;GO:0016020-IEA;GO:0016021-IEA;GO:0055114-IEA;GO:1903507-IEA;GO:0005634-IEA;GO:0003676-IEA	DNA binding-IEA;oxidoreductase activity, acting on the CH-OH group of donors, NAD or NADP as acceptor-IEA;NAD binding-IEA;transcription corepressor activity-IEA;oxidoreductase activity-IEA;membrane-IEA;integral component of membrane-IEA;oxidation-reduction process-IEA;negative regulation of nucleic acid-templated transcription-IEA;nucleus-IEA;nucleic acid binding-IEA	7	GO:0003677;GO:0003714;GO:0016020;GO:0016616;GO:0051287;GO:0055114;GO:1903507	DNA binding;transcription corepressor activity;membrane;oxidoreductase activity, acting on the CH-OH group of donors, NAD or NADP as acceptor;NAD binding;oxidation-reduction process;negative regulation of nucleic acid-templated transcription	-	-	IPR006140;IPR006139;IPR043322;IPR036291	null;DOMAIN;DOMAIN;DOMAIN;DOMAIN;DOMAIN;DOMAIN;DOMAIN;FAMILY;FAMILY;HOMOLOGOUS_SUPERFAMILY	null;D-isomer specific 2-hydroxyacid dehydrogenase, NAD-binding domain;D-isomer specific 2-hydroxyacid dehydrogenase, NAD-binding domain;D-isomer specific 2-hydroxyacid dehydrogenase, catalytic domain;D-isomer specific 2-hydroxyacid dehydrogenase, catalytic domain;D-isomer specific 2-hydroxyacid dehydrogenase, catalytic domain;D-isomer specific 2-hydroxyacid dehydrogenase, catalytic domain;D-isom…	G3DSA:3.40.50.720 (GENE3D);PF02826 (PFAM);G3DSA:3.40.50.720 (GENE3D);PF00389 (PFAM);mobidb-lite (MOBIDB_LITE);mobidb-lite (MOBIDB_LITE);PTHR46029:SF7 (PANTHER);PTHR46029 (PANTHER);cd05299 (CDD);SSF52283 (SUPERFAMILY);SSF51735 (SUPERFAMILY)	;oxidation-reduction process/NAD binding;oxidation-reduction process/oxidoreductase activity, acting on the CH-OH group of donors, NAD or NADP as acceptor/NAD binding;transcription corepressor activity/oxidoreductase activity, acting on the CH-OH group of donors, NAD or NADP as acceptor/NAD binding;
MSTRG.49.1	Protein sax-3	MPDLHSIIFLSVLISLRFSEAEDPEDGVPIIVEHPLDVIVSKGSPATLNCAAKPPGARITWYKDGQPVTTNKDQVNSHRIILDTGALFLLKVNSGKNGKDGDSGSYHCVARNEHGEAQSREGTLKIAMLRDDFRTRPRTVQALSGDKAVLECSPPRGFPEPVVSWRKDDKELKLSEIPRMTLHPDGNLIIEPVEHSDSGTYQCVATNMVGERVSNPARLSVYEKPKFLQEPKDVTVDVGSSVLFDCRVSGEPQPQISWKKKNDQMPVARAYIAKDNRGLRIDRVQISDEGDYVCYARNPAGSIESSARLKVQAPPTFQTKPTDQIVAPGSTATFDCIPVGQPTPAYFWSKEGQQNLLFPGHVSADGRIKVSSSGTLTISDVRPPDEGAYVCAAMNSAGS…	1532	20	0	0.8384	Cbn-sax-3;PRIPAC_34303;Bma-sax-3;sax-3;Cbn-sax-3;LOAG_17117;LOAG_17117;ANCCEY_01555;NECAME_01798;NBR_LOCUS10830;Bma-sax-3;PRIPAC_34303;sax-3;LOAG_17117;sax-3;LOAG_17117;sax-3;NECAME_01798;sax-3;sax-3;LOAG_17117;NBR_LOCUS10830;sax-3;sax-3;PRIPAC_34303;Bma-sax-3;Cbn-sax-3;ANCCEY_01555;NECAME_01798;LOAG_17117;sax-3;NECAME_01798;ANCDUO_06963;NBR_LOCUS10830;PRIPAC_34303;HPBE_LOCUS16441;Acey_s0028.g173…	GO:0005515-IPI;GO:0001764-IMP;GO:0001764-IEA;GO:0006936-IBA;GO:0016020-IEA;GO:0005829-TAS;GO:0016021-IEA;GO:0031430-IBA;GO:0030017-IBA;GO:0033563-IMP;GO:0033563-IEA;GO:0008046-IDA;GO:0008046-IEA;GO:0007155-IEA;GO:1905489-IGI;GO:1905489-IEA;GO:0035385-ISS;GO:0007411-IEA;GO:0097374-IMP;GO:0097374-IEA;GO:0005887-IDA;GO:0005887-IEA;GO:0005886-IEA	protein binding-IPI;neuron migration-IMP;neuron migration-IEA;muscle contraction-IBA;membrane-IEA;cytosol-TAS;integral component of membrane-IEA;M band-IBA;sarcomere-IBA;dorsal/ventral axon guidance-IMP;dorsal/ventral axon guidance-IEA;axon guidance receptor activity-IDA;axon guidance receptor activity-IEA;cell adhesion-IEA;regulation of sensory neuron axon guidance-IGI;regulation of sensory neur…	11	GO:0001764;GO:0005515;GO:0005829;GO:0005887;GO:0006936;GO:0007155;GO:0008046;GO:0031430;GO:0033563;GO:0035385;GO:1905489	neuron migration;protein binding;cytosol;integral component of plasma membrane;muscle contraction;cell adhesion;axon guidance receptor activity;M band;dorsal/ventral axon guidance;Roundabout signaling pathway;regulation of sensory neuron axon guidance	-	-	IPR013783;IPR008160;IPR013098;IPR013783;IPR003961;IPR013783;IPR013783;IPR013783;IPR013783;IPR013783;IPR013783;IPR043204;IPR003961;IPR007110;IPR007110;IPR007110;IPR003961;IPR007110;IPR003961;IPR007110;IPR003961;IPR003961;IPR003961;IPR036179;IPR036179;IPR036179;IPR036179;IPR036179;IPR036116;IPR036116	HOMOLOGOUS_SUPERFAMILY;HOMOLOGOUS_SUPERFAMILY;REPEAT;DOMAIN;HOMOLOGOUS_SUPERFAMILY;HOMOLOGOUS_SUPERFAMILY;DOMAIN;HOMOLOGOUS_SUPERFAMILY;HOMOLOGOUS_SUPERFAMILY;HOMOLOGOUS_SUPERFAMILY;HOMOLOGOUS_SUPERFAMILY;HOMOLOGOUS_SUPERFAMILY;HOMOLOGOUS_SUPERFAMILY;HOMOLOGOUS_SUPERFAMILY;HOMOLOGOUS_SUPERFAMILY;HOMOLOGOUS_SUPERFAMILY;HOMOLOGOUS_SUPERFAMILY;HOMOLOGOUS_SUPERFAMILY;HOMOLOGOUS_SUPERFAMILY;HOMOLOGOUS…	Endonuclease/exonuclease/phosphatase superfamily;Immunoglobulin-like fold;Collagen triple helix repeat;Immunoglobulin I-set;Immunoglobulin-like fold;Immunoglobulin-like fold;Fibronectin type III;Immunoglobulin-like fold;Immunoglobulin-like fold;Immunoglobulin-like fold;Immunoglobulin-like fold;Immunoglobulin-like fold;Immunoglobulin-like fold;Immunoglobulin-like fold;Immunoglobulin-like fold;Immu…	PR00014 (PRINTS);G3DSA:2.60.40.10 (GENE3D);PF01391 (PFAM);PF07679 (PFAM);G3DSA:2.60.40.10 (GENE3D);PF13927 (PFAM);PF00041 (PFAM);G3DSA:2.60.40.10 (GENE3D);G3DSA:2.60.40.10 (GENE3D);G3DSA:2.60.40.10 (GENE3D);G3DSA:2.60.40.10 (GENE3D);G3DSA:2.60.40.10 (GENE3D);G3DSA:2.60.40.10 (GENE3D);mobidb-lite (MOBIDB_LITE);mobidb-lite (MOBIDB_LITE);mobidb-lite (MOBIDB_LITE);mobidb-lite (MOBIDB_LITE);mobidb-lit…	;protein binding;protein binding/cell adhesion/plasma membrane/axon guidance;protein binding;protein binding;protein binding;protein binding;protein binding;protein binding;protein binding;protein binding
MSTRG.49.2	Protein sax-3	MPDLHSIIFLSVLISLRFSEAEDPEDGVPIIVEHPLDVIVSKGSPATLNCAAKPPGARITWYKDGQPVTTNKDQVNSHRIILDTGALFLLKVNSGKNGKDGDSGSYHCVARNEHGEAQSREGTLKIAMLRDDFRTRPRTVQALSGDKAVLECSPPRGFPEPVVSWRKDDKELKLSEIPRMTLHPDGNLIIEPVEHSDSGTYQCVATNMVGERVSNPARLSVYEKPKFLQEPKDVTVDVGSSVLFDCRVSGEPQPQISWKKKNDQMPVARAYIAKDNRGLRIDRVQISDEGDYVCYARNPAGSIESSARLKVQAPPTFQTKPTDQIVAPGSTATFDCIPVGQPTPAYFWSKEGQQNLLFPGHVSADGRIKVSSSGTLTISDVRPPDEGAYVCAAMNSAGS…	1543	20	0	0.8395	Cbn-sax-3;PRIPAC_34303;Bma-sax-3;sax-3;Cbn-sax-3;LOAG_17117;LOAG_17117;ANCCEY_01555;NECAME_01798;NBR_LOCUS10830;Bma-sax-3;PRIPAC_34303;sax-3;LOAG_17117;sax-3;LOAG_17117;sax-3;NECAME_01798;sax-3;sax-3;LOAG_17117;NBR_LOCUS10830;sax-3;sax-3;PRIPAC_34303;Bma-sax-3;Cbn-sax-3;ANCCEY_01555;NECAME_01798;LOAG_17117;sax-3;NECAME_01798;ANCDUO_06963;NBR_LOCUS10830;PRIPAC_34303;HPBE_LOCUS16441;Acey_s0028.g173…	GO:0005515-IPI;GO:0001764-IMP;GO:0001764-IEA;GO:0006936-IBA;GO:0016020-IEA;GO:0005829-TAS;GO:0016021-IEA;GO:0031430-IBA;GO:0030017-IBA;GO:0033563-IMP;GO:0033563-IEA;GO:0008046-IDA;GO:0008046-IEA;GO:0007155-IEA;GO:1905489-IGI;GO:1905489-IEA;GO:0035385-ISS;GO:0007411-IEA;GO:0097374-IMP;GO:0097374-IEA;GO:0005887-IDA;GO:0005887-IEA;GO:0005886-IEA	protein binding-IPI;neuron migration-IMP;neuron migration-IEA;muscle contraction-IBA;membrane-IEA;cytosol-TAS;integral component of membrane-IEA;M band-IBA;sarcomere-IBA;dorsal/ventral axon guidance-IMP;dorsal/ventral axon guidance-IEA;axon guidance receptor activity-IDA;axon guidance receptor activity-IEA;cell adhesion-IEA;regulation of sensory neuron axon guidance-IGI;regulation of sensory neur…	11	GO:0001764;GO:0005515;GO:0005829;GO:0005887;GO:0006936;GO:0007155;GO:0008046;GO:0031430;GO:0033563;GO:0035385;GO:1905489	neuron migration;protein binding;cytosol;integral component of plasma membrane;muscle contraction;cell adhesion;axon guidance receptor activity;M band;dorsal/ventral axon guidance;Roundabout signaling pathway;regulation of sensory neuron axon guidance	-	-	IPR013783;IPR013783;IPR013783;IPR013783;IPR013783;IPR013783;IPR003961;IPR008160;IPR013098;IPR013783;IPR013783;IPR043204;IPR003961;IPR007110;IPR007110;IPR007110;IPR003961;IPR007110;IPR003961;IPR007110;IPR003961;IPR003961;IPR003961;IPR036179;IPR036179;IPR036179;IPR036179;IPR036116;IPR036179;IPR036116	HOMOLOGOUS_SUPERFAMILY;HOMOLOGOUS_SUPERFAMILY;HOMOLOGOUS_SUPERFAMILY;HOMOLOGOUS_SUPERFAMILY;HOMOLOGOUS_SUPERFAMILY;HOMOLOGOUS_SUPERFAMILY;HOMOLOGOUS_SUPERFAMILY;HOMOLOGOUS_SUPERFAMILY;DOMAIN;REPEAT;DOMAIN;HOMOLOGOUS_SUPERFAMILY;HOMOLOGOUS_SUPERFAMILY;HOMOLOGOUS_SUPERFAMILY;HOMOLOGOUS_SUPERFAMILY;HOMOLOGOUS_SUPERFAMILY;HOMOLOGOUS_SUPERFAMILY;HOMOLOGOUS_SUPERFAMILY;HOMOLOGOUS_SUPERFAMILY;FAMILY;FAM…	NAD(P)-binding domain superfamily;Immunoglobulin-like fold;Immunoglobulin-like fold;Immunoglobulin-like fold;Immunoglobulin-like fold;Immunoglobulin-like fold;Immunoglobulin-like fold;Immunoglobulin-like fold;Fibronectin type III;Collagen triple helix repeat;Immunoglobulin I-set;Immunoglobulin-like fold;Immunoglobulin-like fold;Immunoglobulin-like fold;Immunoglobulin-like fold;Immunoglobulin-like…	PR00014 (PRINTS);G3DSA:2.60.40.10 (GENE3D);G3DSA:2.60.40.10 (GENE3D);G3DSA:2.60.40.10 (GENE3D);G3DSA:2.60.40.10 (GENE3D);PF13927 (PFAM);G3DSA:2.60.40.10 (GENE3D);G3DSA:2.60.40.10 (GENE3D);PF00041 (PFAM);PF01391 (PFAM);PF07679 (PFAM);G3DSA:2.60.40.10 (GENE3D);G3DSA:2.60.40.10 (GENE3D);mobidb-lite (MOBIDB_LITE);mobidb-lite (MOBIDB_LITE);mobidb-lite (MOBIDB_LITE);mobidb-lite (MOBIDB_LITE);mobidb-lit…	;protein binding;protein binding/cell adhesion/plasma membrane/axon guidance;protein binding;protein binding;protein binding;protein binding;protein binding;protein binding;protein binding;protein binding
transcript_ACOC_0000005901-mRNA-1	fibronectin type III domain protein	MVFGSFLSLTSALSLCLNGTNCGNLCITTFFSAILVQPPPVIEYGHQNQTLMVGSSATLPCQASGRAPPRITWLLDGNLVDTTKDNRYSQHSSGSLHIADLRKSDTGVYTCRAKNDDGESTWTASLVVEDHNTKSVFSRMPDRDNFPSAPSQPVASNVSDTEVDLEWRPPERSGGSPITGYIIQFFSPEVGEVGGVTTFRQRFSIVFTVSPDDLENLNLEKATRRITSEQLIKLEEVKTINSTAVRLFWKRKKVEDMVEGYYIKWRGPPRSNINQWVNVSGAHVESYVVNGLMPFTNYEFFVIPYHKSIQGAPSNSMDALTAEAPPSLPPSDVHIRMLNLTTLRIGWRAPPADGMNGILKGFQIVILGKGTKFNRNITTNERAASVTLFHLSPGMTYKI…	826	20	0	0.8029	WR25_09826;Cni-sax-3;Cni-sax-3;WR25_09826;WR25_22841;ANCCEY_01555;NECAME_01798;NBR_LOCUS10830;sax-3;Cni-sax-3;NECAME_01798;sax-3;WR25_22841;NBR_LOCUS10830;FL82_00838;WR25_09826;Cni-sax-3;ANCCEY_01555;NECAME_01798;sax-3;Cni-sax-3;NECAME_01798;ANCDUO_06963;NBR_LOCUS10830;WR25_09826;HPBE_LOCUS16441;Acey_s0028.g1733;sax-3;ACOC_LOCUS60;FL82_00838;ANCDUO_06963;NBR_LOCUS10830;Cni-sax-3;ACOC_LOCUS60;OESD…	GO:0006936-IBA;GO:0007155-IEA;GO:0016020-IEA;GO:0016021-IEA;GO:0007411-IEA;GO:0031430-IBA;GO:0005886-IEA;GO:0030017-IBA	muscle contraction-IBA;cell adhesion-IEA;membrane-IEA;integral component of membrane-IEA;axon guidance-IEA;M band-IBA;plasma membrane-IEA;sarcomere-IBA	6	GO:0005886;GO:0006936;GO:0007155;GO:0007411;GO:0016021;GO:0031430	plasma membrane;muscle contraction;cell adhesion;axon guidance;integral component of membrane;M band	-	-	IPR013783;IPR013783;IPR003961;IPR013783;IPR013783;IPR007110;IPR003961;IPR003961;IPR003961;IPR003961;IPR003961;IPR036179;IPR036116;IPR036116	FAMILY;HOMOLOGOUS_SUPERFAMILY;HOMOLOGOUS_SUPERFAMILY;DOMAIN;HOMOLOGOUS_SUPERFAMILY;HOMOLOGOUS_SUPERFAMILY;HOMOLOGOUS_SUPERFAMILY;HOMOLOGOUS_SUPERFAMILY;HOMOLOGOUS_SUPERFAMILY;HOMOLOGOUS_SUPERFAMILY;HOMOLOGOUS_SUPERFAMILY;HOMOLOGOUS_SUPERFAMILY;HOMOLOGOUS_SUPERFAMILY;HOMOLOGOUS_SUPERFAMILY;HOMOLOGOUS_SUPERFAMILY;HOMOLOGOUS_SUPERFAMILY;DOMAIN;DOMAIN;DOMAIN;DOMAIN;DOMAIN;DOMAIN;DOMAIN;HOMOLOGOUS_SUP…	E3 ubiquitin-protein ligase UBR1-like;Immunoglobulin-like fold;Immunoglobulin-like fold;Fibronectin type III;Immunoglobulin-like fold;Immunoglobulin-like fold;Immunoglobulin-like fold;Immunoglobulin-like fold;Immunoglobulin-like fold;Immunoglobulin-like fold;Immunoglobulin-like fold;Immunoglobulin-like fold;Immunoglobulin-like fold;Immunoglobulin-like fold;Immunoglobulin-like fold;Immunoglobulin-…	PR00014 (PRINTS);G3DSA:2.60.40.10 (GENE3D);G3DSA:2.60.40.10 (GENE3D);PF00041 (PFAM);G3DSA:2.60.40.10 (GENE3D);G3DSA:2.60.40.10 (GENE3D);PF13927 (PFAM);mobidb-lite (MOBIDB_LITE);mobidb-lite (MOBIDB_LITE);mobidb-lite (MOBIDB_LITE);mobidb-lite (MOBIDB_LITE);mobidb-lite (MOBIDB_LITE);mobidb-lite (MOBIDB_LITE);mobidb-lite (MOBIDB_LITE);PTHR44170 (PANTHER);PTHR44170:SF9 (PANTHER);PS50835 (PROSITE_PROFI…	;protein binding;protein binding;protein binding;protein binding;protein binding;protein binding;protein binding;protein binding
transcript_ACOC_0000006001-mRNA-1	immunoglobulin I-set domain protein	MRHPEDGVPIIVEHPLDVIVSKGSPATLNCAAKPPGARITWYKDGQPVTTNKDQVNSHRIILDTGALFLLKVNSVILKQQALIEFLGKNGKDGDSGSYHCVARNEHGEAQSREGTLKIAMLRDDFRTRPRTVQVEHSDSGTYQCVATNMVGERVSNPARLSVYEKPKFLQEPKDVTVDVGSSVLFDCRVSGEPQPQISWKKKNDQMPAPPTFQTKPTDQIVAPGSTATFDCIPVGQPTPAYFWSKEGQQNLLFPGHVSADGRIKVSSSGTLTISDVRPPDEGAYVCAAMNSAGSSLSKALLKLSAKGMLLSFTVSLCVFVSGLHRRLRLCSLEAISYEYAVSF	343	20	0	0.6808	Acey_s0028.g1735;Cbn-sax-3;Acey_s0028.g1735;sax-3;WR25_09827;Cbn-sax-3;Cre-sax-3;ACOC_LOCUS61;NECAME_01798;sax-3;sax-3;DICVIV_08427;sax-3;NECAME_01798;WR25_09827;sax-3;sax-3;sax-3;sax-3;NBR_LOCUS10829;Cre-sax-3;Cre-sax-3;WR25_22842;Cbn-sax-3;DICVIV_08427;NECAME_01798;DICVIV_08427;Cre-sax-3;sax-3;NECAME_01798;Cre-sax-3;sax-3;sax-3;sax-3;sax-3;Cbn-sax-3;ACOC_LOCUS61;Cbn-sax-3;sax-3;WR25_22842;NBR_L…	GO:0005515-IPI;GO:0006936-IBA;GO:0001764-IMP;GO:0001764-IEA;GO:0016020-IEA;GO:0005829-TAS;GO:0016021-IEA;GO:0031430-IBA;GO:0030017-IBA;GO:0033563-IMP;GO:0033563-IEA;GO:0008046-IDA;GO:0008046-IEA;GO:0007155-IEA;GO:1905489-IGI;GO:1905489-IEA;GO:0035385-ISS;GO:0007411-IEA;GO:0005887-IDA;GO:0005887-IEA;GO:0097374-IMP;GO:0097374-IEA;GO:0005886-IEA	protein binding-IPI;muscle contraction-IBA;neuron migration-IMP;neuron migration-IEA;membrane-IEA;cytosol-TAS;integral component of membrane-IEA;M band-IBA;sarcomere-IBA;dorsal/ventral axon guidance-IMP;dorsal/ventral axon guidance-IEA;axon guidance receptor activity-IDA;axon guidance receptor activity-IEA;cell adhesion-IEA;regulation of sensory neuron axon guidance-IGI;regulation of sensory neur…	9	GO:0001764;GO:0005515;GO:0005829;GO:0005887;GO:0007155;GO:0008046;GO:0030017;GO:0033563;GO:1905489	neuron migration;protein binding;cytosol;integral component of plasma membrane;cell adhesion;axon guidance receptor activity;sarcomere;dorsal/ventral axon guidance;regulation of sensory neuron axon guidance	-	-	IPR013783;IPR013783;IPR013783;IPR013783;IPR013098;IPR043204;IPR043204;IPR007110;IPR007110;IPR007110;IPR036179;IPR036179;IPR036179	FAMILY;HOMOLOGOUS_SUPERFAMILY;HOMOLOGOUS_SUPERFAMILY;HOMOLOGOUS_SUPERFAMILY;HOMOLOGOUS_SUPERFAMILY;DOMAIN;DOMAIN;DOMAIN;DOMAIN;DOMAIN;FAMILY;FAMILY;DOMAIN;DOMAIN;DOMAIN;HOMOLOGOUS_SUPERFAMILY;HOMOLOGOUS_SUPERFAMILY;HOMOLOGOUS_SUPERFAMILY	mRNA splicing factor SYF2;Immunoglobulin-like fold;Immunoglobulin-like fold;Immunoglobulin-like fold;Immunoglobulin-like fold;Immunoglobulin I-set;Immunoglobulin I-set;Immunoglobulin I-set;Immunoglobulin I-set;Immunoglobulin I-set;Basigin-like;Basigin-like;Immunoglobulin-like domain;Immunoglobulin-like domain;Immunoglobulin-like domain;Immunoglobulin-like domain superfamily;Immunoglobulin-like do…	PF13927 (PFAM);G3DSA:2.60.40.10 (GENE3D);G3DSA:2.60.40.10 (GENE3D);G3DSA:2.60.40.10 (GENE3D);G3DSA:2.60.40.10 (GENE3D);PF07679 (PFAM);mobidb-lite (MOBIDB_LITE);mobidb-lite (MOBIDB_LITE);PTHR10075:SF37 (PANTHER);PTHR10075:SF37 (PANTHER);PTHR10075 (PANTHER);PTHR10075 (PANTHER);PS50835 (PROSITE_PROFILES);PS50835 (PROSITE_PROFILES);PS50835 (PROSITE_PROFILES);SSF48726 (SUPERFAMILY);SSF48726 (SUPERFAMI…	;protein binding/cell adhesion/plasma membrane/axon guidance;protein binding/cell adhesion/plasma membrane/axon guidance;
MSTRG.50.1	Ulp1 protease family, catalytic domain protein	MPARKVRIQLEPSDEADELCQRIWNGQSSQSEEITEAFGIKLTRRDLSTLSDRNWLNDQVIDFYLQLICQRSEATENLPKVYAFNTFFYLNISTKGYDSVRRWTRKVDIFEYDLLLVPIHLEAHWCLAIVDLAMKRIDYYDSLLGRNKKCLDCLKNYLTEEYEDKKKETFGFKGWKFSLRRDIPRQTNGSDCGVFVMNAKFVSDLPVFRVEESAVVNIELLRGIEQSQQIRIGSGGPQSVNPMAQLASSAPVPNAGASSGSALTRGSGPAGPPGSPMTAHGRLNDNNPLMSDSFRLPNPSNRHPGSGSAGAARSAPYRRTLLCSSGNSSTSDVPRSDSRCHLKECRQHIHRSLCDYLVGRLANVIFPLLNPSAINNQRIREVISDAREVEAATFEIAND…	649	20	5.1e-133	0.7895	Acey_s0207.g2007;Acey_s0207.g2007;Acey_s0207.g2007;Acey_s0207.g2007;ANCDUO_23960;TELCIR_10555;Acey_s0207.g2007;ANCCAN_27120;HPLM_LOCUS6422;ACOC_LOCUS62;OESDEN_20124;TELCIR_10555;Acey_s0207.g2007;Acey_s0207.g2007;Acey_s0207.g2007;Acey_s0207.g2007;ulp-1;Acey_s0207.g2007;Acey_s0207.g2007;Acey_s0207.g2007;Acey_s0207.g2007;NBR_LOCUS5941;Cni-ulp-1;Acey_s0207.g2007;HPBE_LOCUS12108;Cni-ulp-1;ACOC_LOCUS11…	GO:0000398-IEA;GO:0006508-IEA;GO:0016567-IEA;GO:0006281-IEA;GO:0061630-IEA;GO:0008233-IEA;GO:0032880-IEA;GO:0016926-IBA;GO:0016926-IEA;GO:0009792-IEA;GO:1904333-IEA;GO:0008234-IEA;GO:0000974-IEA;GO:0004842-IEA;GO:0005634-IBA	mRNA splicing, via spliceosome-IEA;proteolysis-IEA;protein ubiquitination-IEA;DNA repair-IEA;ubiquitin protein ligase activity-IEA;peptidase activity-IEA;regulation of protein localization-IEA;protein desumoylation-IBA;protein desumoylation-IEA;embryo development ending in birth or egg hatching-IEA;positive regulation of error-prone translesion synthesis-IEA;cysteine-type peptidase activity-IEA;P…	7	GO:0000398;GO:0000974;GO:0006281;GO:0006508;GO:0008234;GO:0016567;GO:0061630	mRNA splicing, via spliceosome;Prp19 complex;DNA repair;proteolysis;cysteine-type peptidase activity;protein ubiquitination;ubiquitin protein ligase activity	-	-	IPR001487;IPR036427;IPR036529;IPR003101;IPR001487;IPR003653;IPR003101;IPR001487;IPR003653;IPR036427;IPR036529;IPR038765	DOMAIN;DOMAIN;HOMOLOGOUS_SUPERFAMILY;HOMOLOGOUS_SUPERFAMILY;DOMAIN;DOMAIN;DOMAIN;DOMAIN;DOMAIN;DOMAIN;DOMAIN;DOMAIN;DOMAIN;DOMAIN;DOMAIN;HOMOLOGOUS_SUPERFAMILY;HOMOLOGOUS_SUPERFAMILY;HOMOLOGOUS_SUPERFAMILY	Bromodomain;Bromodomain;Bromodomain-like superfamily;Coactivator CBP, KIX domain superfamily;Coactivator CBP, KIX domain;Bromodomain;Ulp1 protease family, C-terminal catalytic domain;Ulp1 protease family, C-terminal catalytic domain;Ulp1 protease family, C-terminal catalytic domain;Ulp1 protease family, C-terminal catalytic domain;Ulp1 protease family, C-terminal catalytic domain;Ulp1 protease fa…	PR00503 (PRINTS);G3DSA:3.40.395.10 (GENE3D);G3DSA:1.20.920.10 (GENE3D);G3DSA:1.10.246.20 (GENE3D);PF02172 (PFAM);PF00439 (PFAM);PF02902 (PFAM);mobidb-lite (MOBIDB_LITE);mobidb-lite (MOBIDB_LITE);mobidb-lite (MOBIDB_LITE);PTHR12606 (PANTHER);PTHR12606:SF30 (PANTHER);PS50952 (PROSITE_PROFILES);PS50014 (PROSITE_PROFILES);PS50600 (PROSITE_PROFILES);SSF47370 (SUPERFAMILY);SSF47040 (SUPERFAMILY);SSF540…	protein binding;protein binding;regulation of transcription, DNA-templated/transcription coregulator activity;transcription coregulator activity/regulation of transcription, DNA-templated;protein binding;cysteine-type peptidase activity/proteolysis;transcription coregulator activity/regulation of transcription, DNA-templated;protein binding;cysteine-type peptidase activity/proteolysis;protein bin…
MSTRG.52.1	Catechol-O-MethylTransferase family	MKGYDRECRRLSDHSTSLAVAARSTLSHRSTSSRINGCYRPCMPTISKSYQNEKIDPVVDYCSRLTVQQYPLQKELQDSTLKNAPSPSMLGAPEVLTVGSNFIHLIGGKKVLDIGTFTGASALAWALAVGKEGKVYTLDISHKNFAEYGVPIISKDEEVFKRIIPMEGSALEILDKMVANGETGTFDFAFIDADKQNYPIYYELVVTLLRKGGVVMVDNALWDGQVTQHPSTFNEATRKIDETNKKIFQDDRTYSALLNCGDGIHIAFKK	270	20	1.3e-169	0.8378	ANCCAN_02834;ANCCAN_02834;DICVIV_11844;ANCDUO_01040;GCK72_019225;OESDEN_02022;FL81_15445;OESDEN_02022;comt-4;TELCIR_00088;TELCIR_00088;ANCDUO_01040;comt-4;CRE_18530;comt-4;comt-4;FL83_05361;ANCCEY_02004;Acey_s0072.g696;Acey_s0072.g696;ANCDUO_01040;Acey_s0072.g696;HPBE_LOCUS11172;ANCCEY_02004;ANCCAN_02834;Acey_s0072.g696;CAEBREN_28843;DICVIV_11844;DICVIV_11844;ACOC_LOCUS63;Acey_s0072.g696;TELCIR_0…	GO:0008171-IEA;GO:0008168-IEA;GO:0016740-IEA;GO:0008757-IBA;GO:0032259-IEA	O-methyltransferase activity-IEA;methyltransferase activity-IEA;transferase activity-IEA;S-adenosylmethionine-dependent methyltransferase activity-IBA;methylation-IEA	3	GO:0008171;GO:0008757;GO:0032259	O-methyltransferase activity;S-adenosylmethionine-dependent methyltransferase activity;methylation	-	-	IPR002935;IPR002935;IPR029063	FAMILY;FAMILY;FAMILY;FAMILY;FAMILY;FAMILY;HOMOLOGOUS_SUPERFAMILY	Class I-like SAM-dependent O-methyltransferase;Class I-like SAM-dependent O-methyltransferase;Class I-like SAM-dependent O-methyltransferase;Class I-like SAM-dependent O-methyltransferase;Class I-like SAM-dependent O-methyltransferase;Class I-like SAM-dependent O-methyltransferase;S-adenosyl-L-methionine-dependent methyltransferase	PF01596 (PFAM);G3DSA:3.40.50.150 (GENE3D);PTHR10509 (PANTHER);PTHR10509:SF67 (PANTHER);PS51682 (PROSITE_PROFILES);cd02440 (CDD);SSF53335 (SUPERFAMILY)	O-methyltransferase activity;O-methyltransferase activity;
MSTRG.53.1	CBS domain protein	MPSGAALPRLALFDVSDPLGMRAGHGTHFALIVGKYLRNILWNIQRVTSDRHCDDERAFDYMYKTFSNVIIDDPDLVYAEFLRHSQCYETMSSNNKVVVFTDDLSVRKAFYGLLYNSTRTGLIADSTTMQVTGVLSITDFTMVLMMLWKFRENSEAMKGTSLSYSELEAVDIFDVKISRWKEILKMQGMNKGFISVNSNESVYRAVELLTKHRIHRLPVLDRRTGNCTFILTHRRILHYLWKHCCCLSRPWYMNERVADLKLGTYFNIHYATHDMTLMQVLDMIIDNGISGVPIVEASTMKVVDVYTRFDAVAAAFSTTIDMSVSMSEAIRQRQKVYGDRDGVITAPEDVRMLDLVETFVEKNVHRIFLVDNCLRLKGLVSLFDLITYMVQRPAHTEYN…	404	20	0	0.7876	aakg-3;aakg-3;aakg-3;aakg-3;aakg-3;aakg-3;aakg-3;aakg-3;aakg-3;aakg-3;aakg-3;aakg-3;aakg-3;aakg-3;aakg-3;aakg-3;aakg-3;aakg-3;aakg-3;aakg-3;aakg-3;aakg-3;aakg-3;aakg-3	GO:0004679-IBA;GO:0005737-IBA;GO:0050790-IBA;GO:0016310-IEA;GO:0016301-IEA;GO:0019887-IBA;GO:0031588-IBA;GO:0019901-IBA;GO:0045859-IEA;GO:0016208-IBA;GO:0042149-IBA;GO:0005634-IBA;GO:0006468-IBA	AMP-activated protein kinase activity-IBA;cytoplasm-IBA;regulation of catalytic activity-IBA;phosphorylation-IEA;kinase activity-IEA;protein kinase regulator activity-IBA;nucleotide-activated protein kinase complex-IBA;protein kinase binding-IBA;regulation of protein kinase activity-IEA;AMP binding-IBA;cellular response to glucose starvation-IBA;nucleus-IBA;protein phosphorylation-IBA	10	GO:0004679;GO:0005634;GO:0005737;GO:0006468;GO:0016208;GO:0019887;GO:0019901;GO:0031588;GO:0042149;GO:0050790	AMP-activated protein kinase activity;nucleus;cytoplasm;protein phosphorylation;AMP binding;protein kinase regulator activity;protein kinase binding;nucleotide-activated protein kinase complex;cellular response to glucose starvation;regulation of catalytic activity	EC:2.7.11.11	cAMP-dependent protein kinase	IPR000644;IPR000644;IPR000644;IPR000644;IPR000644	DOMAIN;DOMAIN;DOMAIN;DOMAIN;DOMAIN;DOMAIN;DOMAIN;DOMAIN;DOMAIN;DOMAIN;DOMAIN;DOMAIN;DOMAIN	CBS domain;CBS domain;CBS domain;CBS domain;CBS domain;CBS domain;CBS domain;CBS domain;CBS domain;CBS domain;CBS domain;CBS domain;CBS domain	PF00571 (PFAM);G3DSA:3.10.580.10 (GENE3D);G3DSA:3.10.580.10 (GENE3D);PTHR13780:SF99 (PANTHER);PTHR13780 (PANTHER);PS51371 (PROSITE_PROFILES);PS51371 (PROSITE_PROFILES);PS51371 (PROSITE_PROFILES);PS51371 (PROSITE_PROFILES);cd04641 (CDD);cd04618 (CDD);SSF54631 (SUPERFAMILY);SSF54631 (SUPERFAMILY)	;
transcript_ACOC_0000006301-mRNA-1	CBS domain protein	MLILRIEDCRIAFVGKYLRNILWNIQRVTSDRHCDDERAFDYMYKTFSNVIIDDPDLVYAEFLRHSQCYETMSSNNKVVVFTDDLSVRKAFYGLLYNSTRTGLIADSTTMQVTGVLSITDFTMVLMMLWKFRENSEAMKGTSLSYSELEAVDIFDVKISRWKGNDELYRFSLIYQFQSVYRAVELLTKHRIHRLPVLDRRTGNCTFILTHRRILHYLWKHATHDMTLMQVLDMIIDNGISGVPIVEASTMKVVDVYTRFDAVAAAFSTTIDMSVSMSEAIRQRQKVYGDRDGVITAPEDVRMLDLVETFVEKNVHRIFLVDNCLRLKVRL	330	20	0	0.715	aakg-3;aakg-3;aakg-3;aakg-3;aakg-3;aakg-3;aakg-3;aakg-3;aakg-3;aakg-3;aakg-3;aakg-3;aakg-3;aakg-3;aakg-3;aakg-3;aakg-3;aakg-3;aakg-3;aakg-3;aakg-3;aakg-3;aakg-3;aakg-3	GO:0004679-IBA;GO:0005737-IBA;GO:0050790-IBA;GO:0016310-IEA;GO:0016301-IEA;GO:0019887-IBA;GO:0031588-IBA;GO:0019901-IBA;GO:0045859-IEA;GO:0016208-IBA;GO:0042149-IBA;GO:0005634-IBA;GO:0006468-IBA	AMP-activated protein kinase activity-IBA;cytoplasm-IBA;regulation of catalytic activity-IBA;phosphorylation-IEA;kinase activity-IEA;protein kinase regulator activity-IBA;nucleotide-activated protein kinase complex-IBA;protein kinase binding-IBA;regulation of protein kinase activity-IEA;AMP binding-IBA;cellular response to glucose starvation-IBA;nucleus-IBA;protein phosphorylation-IBA	6	GO:0005488;GO:0005622;GO:0016301;GO:0016310;GO:0050790;GO:0110165	binding;intracellular;kinase activity;phosphorylation;regulation of catalytic activity;cellular anatomical entity	-	-	IPR000644;IPR000644;IPR000644;IPR000644	DOMAIN;DOMAIN;DOMAIN;DOMAIN;DOMAIN;DOMAIN;DOMAIN;DOMAIN;DOMAIN;DOMAIN;DOMAIN;DOMAIN	Potassium channel domain;Potassium channel domain;Potassium channel domain;Potassium channel domain;CBS domain;CBS domain;CBS domain;CBS domain;CBS domain;CBS domain;CBS domain;CBS domain	G3DSA:3.10.580.10 (GENE3D);G3DSA:3.10.580.10 (GENE3D);PTHR13780 (PANTHER);PTHR13780:SF99 (PANTHER);PS51371 (PROSITE_PROFILES);PS51371 (PROSITE_PROFILES);PS51371 (PROSITE_PROFILES);PS51371 (PROSITE_PROFILES);cd04641 (CDD);cd04618 (CDD);SSF54631 (SUPERFAMILY);SSF54631 (SUPERFAMILY)	;
MSTRG.54.1	Gamma-aminobutyric acid type B receptor subunit 1	MTVLSWLVLVGALASLRADERIPLHIGGTFPMEAGSGGWAGGQACLPAVQMALEDVNNRPDVLPGYVLHMNTSNSKCQAGLATQQLYDLLYTPPAKLMLLAGCSPVTTVIAESAPVWKLVVVTLSNRERFPTLFRTHPSANMQNPTRVRLFEKFRWRKITILQSVEEVFTSTAKDLEALGRRKGIRVERQSFYGDPTDAMKTLRRQDARVIVGLFYVTEARKVLCQAYHHKLYGRKYTWFFIGWYADTWYVPPVEEHLNCTVEQMVEAAQYHFTTESVMLSRDENATISGMTGKEFQARLTAMLSPDSDPANTGGFPEAPLAYDAVWALALAFNCTRNRLPSNIRLEQFTYDNQLMADILFECVKNTLFKGVSGKVMFSDSGDRIARTQIEQMQNGKYV…	897	20	0	0.8215	HPLM_LOCUS16005;Acey_s0093.g2664;Cni-gbb-1;gbb-1;ACOC_LOCUS65;gbb-1;GABA1;Acey_s0093.g2664;gbb-1;CRE_07528;FL83_01066;DICVIV_12651;Gabbr1;gbb-1;SVUK_LOCUS10090;gbb-1;SVUK_LOCUS10090;gbb-1;GABA1;gbb-1;gbb-1;Gabbr1;FL83_01066;SVUK_LOCUS10090;Acey_s0093.g2664;gbb-1;HPLM_LOCUS16005;Cni-gbb-1;DICVIV_12651;Acey_s0093.g2664;Acey_s0093.g2664;gbb-1;CRE_07528;gbb-1;FL83_01066;GCK72_023841;HPLM_LOCUS16005;A…	GO:0004965-IBA;GO:0004965-IMP;GO:0004965-IEA;GO:0004888-IBA;GO:0042493-IMP;GO:0042493-IEA;GO:0016020-IEA;GO:0016021-IEA;GO:0032223-IMP;GO:0032223-IEA;GO:0038039-IBA;GO:0007165-IEA;GO:0007186-IMP;GO:0007186-IEA;GO:0007214-IBA;GO:1902712-TAS;GO:0004930-IEA;GO:0005886-IEA	G protein-coupled GABA receptor activity-IBA;G protein-coupled GABA receptor activity-IMP;G protein-coupled GABA receptor activity-IEA;transmembrane signaling receptor activity-IBA;response to drug-IMP;response to drug-IEA;membrane-IEA;integral component of membrane-IEA;negative regulation of synaptic transmission, cholinergic-IMP;negative regulation of synaptic transmission, cholinergic-IEA;G pr…	6	GO:0004965;GO:0007214;GO:0032223;GO:0038039;GO:0042493;GO:1902712	G protein-coupled GABA receptor activity;gamma-aminobutyric acid signaling pathway;negative regulation of synaptic transmission, cholinergic;G protein-coupled receptor heterodimeric complex;response to drug;G protein-coupled GABA receptor complex	-	-	IPR017978;IPR001828;IPR002455;IPR017978;IPR028082	HOMOLOGOUS_SUPERFAMILY;HOMOLOGOUS_SUPERFAMILY;DOMAIN;DOMAIN;DOMAIN;DOMAIN;DOMAIN;FAMILY;FAMILY;DOMAIN;DOMAIN;DOMAIN;HOMOLOGOUS_SUPERFAMILY	Uncharacterised domain, di-copper centre;Uncharacterised domain, di-copper centre;GPCR family 3, C-terminal;Receptor, ligand binding region;Receptor, ligand binding region;Receptor, ligand binding region;Receptor, ligand binding region;GPCR family 3, GABA-B receptor;GPCR family 3, GABA-B receptor;GPCR family 3, C-terminal;GPCR family 3, C-terminal;GPCR family 3, C-terminal;Periplasmic binding pro…	PR01177 (PRINTS);PR01176 (PRINTS);PF00003 (PFAM);PF01094 (PFAM);G3DSA:3.40.50.2300 (GENE3D);G3DSA:3.40.50.2300 (GENE3D);mobidb-lite (MOBIDB_LITE);PTHR10519 (PANTHER);PTHR10519:SF42 (PANTHER);PS50259 (PROSITE_PROFILES);cd06366 (CDD);cd15291 (CDD);SSF53822 (SUPERFAMILY)	;G protein-coupled receptor signaling pathway/integral component of membrane/G protein-coupled receptor activity;G protein-coupled receptor signaling pathway/G protein-coupled GABA receptor activity/integral component of membrane;G protein-coupled receptor signaling pathway/integral component of membrane/G protein-coupled receptor activity;
transcript_ACOC_0000006401-mRNA-1	Gamma-aminobutyric acid type B receptor subunit 1	MEAGSGGWAGGQACLPAVQMALEDVNNRPDVLPGYVLHMNTSNSKCQAGLATQQLYDLLYTPPAKLMLLAGCSPVTTVIAESAPVWKLVVVSTRSALSNRERFPTLFRTHPSANMQNPTRLFEKFRWRKITILQSVEEVFTSTAKDLEALGRRKGIRVERQSFYGDPTDAMKTLRRQDARVIVGLFYVTEARKVLCQAYHHKLYGRKYTWFFIGWYADTWYVPPVEEHLNCTVEQMVEAAQYHFTTESVMLSRDENATISGMTGKEFQARLTAMLSPDSDPANTGGFPEAPLAYDAVWALALAFNCTRNRLPSNIRLEQFTYDNQLMADILFECVKNTLFKGVSGKVMFSDSGDRIARTQIEQMQNGKYVVMGFYDTTTQELEWYGKEKWYSSKGPPPD…	777	20	0	0.8055	HPLM_LOCUS16005;Acey_s0093.g2664;Cni-gbb-1;gbb-1;ACOC_LOCUS65;gbb-1;GABA1;Acey_s0093.g2664;gbb-1;CRE_07528;FL83_01066;DICVIV_12651;Gabbr1;gbb-1;SVUK_LOCUS10090;gbb-1;SVUK_LOCUS10090;gbb-1;GABA1;gbb-1;gbb-1;Gabbr1;FL83_01066;SVUK_LOCUS10090;Acey_s0093.g2664;gbb-1;HPLM_LOCUS16005;Cni-gbb-1;DICVIV_12651;Acey_s0093.g2664;Acey_s0093.g2664;gbb-1;CRE_07528;gbb-1;FL83_01066;GCK72_023841;HPLM_LOCUS16005;A…	GO:0004965-IBA;GO:0004965-IMP;GO:0004965-IEA;GO:0004888-IBA;GO:0042493-IMP;GO:0042493-IEA;GO:0016020-IEA;GO:0016021-IEA;GO:0032223-IMP;GO:0032223-IEA;GO:0038039-IBA;GO:0007165-IEA;GO:0007186-IMP;GO:0007186-IEA;GO:0007214-IBA;GO:1902712-TAS;GO:0004930-IEA;GO:0005886-IEA	G protein-coupled GABA receptor activity-IBA;G protein-coupled GABA receptor activity-IMP;G protein-coupled GABA receptor activity-IEA;transmembrane signaling receptor activity-IBA;response to drug-IMP;response to drug-IEA;membrane-IEA;integral component of membrane-IEA;negative regulation of synaptic transmission, cholinergic-IMP;negative regulation of synaptic transmission, cholinergic-IEA;G pr…	6	GO:0004965;GO:0007214;GO:0032223;GO:0038039;GO:0042493;GO:1902712	G protein-coupled GABA receptor activity;gamma-aminobutyric acid signaling pathway;negative regulation of synaptic transmission, cholinergic;G protein-coupled receptor heterodimeric complex;response to drug;G protein-coupled GABA receptor complex	-	-	IPR017978;IPR001828;IPR002455;IPR017978;IPR028082	REPEAT;REPEAT;DOMAIN;DOMAIN;DOMAIN;DOMAIN;DOMAIN;FAMILY;DOMAIN;DOMAIN;DOMAIN;HOMOLOGOUS_SUPERFAMILY	Collagen triple helix repeat;Collagen triple helix repeat;GPCR family 3, C-terminal;GPCR family 3, C-terminal;Receptor, ligand binding region;Receptor, ligand binding region;Receptor, ligand binding region;GPCR family 3, GABA-B receptor;GPCR family 3, C-terminal;GPCR family 3, C-terminal;GPCR family 3, C-terminal;Periplasmic binding protein-like I	PR01176 (PRINTS);PR01177 (PRINTS);PF00003 (PFAM);G3DSA:3.40.50.2300 (GENE3D);PF01094 (PFAM);G3DSA:3.40.50.2300 (GENE3D);PTHR10519:SF42 (PANTHER);PTHR10519 (PANTHER);PS50259 (PROSITE_PROFILES);cd15291 (CDD);cd06366 (CDD);SSF53822 (SUPERFAMILY)	;G protein-coupled receptor signaling pathway/integral component of membrane/G protein-coupled receptor activity;G protein-coupled receptor signaling pathway/G protein-coupled GABA receptor activity/integral component of membrane;G protein-coupled receptor signaling pathway/integral component of membrane/G protein-coupled receptor activity;
transcript_ACOC_0000006501-mRNA-1	endonuclease/exonuclease/phosphatase family protein	MARRRRRHLFNTIFDTRKELFPGTSDSRGVGDVGVLVNTILAMNMDSFEQLTTRTEGLPLKRCGPLPALTIFGFHAPPSNYGEDEVEAFYMDLYRFYTEDDKFSRLPLDI	110	20	7.7e-76	0.7553	NECAME_10526;NECAME_10526;NECAME_10526	GO:0090305-IEA;GO:0004527-IEA;GO:0004519-IEA	nucleic acid phosphodiester bond hydrolysis-IEA;exonuclease activity-IEA;endonuclease activity-IEA	1	GO:0004518	nuclease activity	-	-	-	-	-	-	-
MSTRG.56.1	G_PROTEIN_RECEP_F1_2 domain-containing protein	MLSNGSVEDEMDPLCAQYETYTTVRFIFITIATVIACLGTAGNLLLMYIFAAKKTKITPATLYPTLLAFLDFAICLEYLLLFGVDAAVSFLRIESLFLLYYMYIIPAYVASRITQLAIPYMLIFATVERLVWTSGKIRSRFLLAMNSTSGRYFTAIISLLVCVILRLPTAFATEVAVYPQCEDFFRTMTTQPRTWTYDSEIYYFFDFHLMTIAQTVVPFVILLALNIVIIRKITASDQKKEILCDGRGIEPLNSSKSSAFQERSSKRASIAITLSIRSMKKVSASVRCAIMTMVAIVASYLISNTLHLILTVMERSDHPLLHDTEDPLLSSTFHTFFSDSVSFVYMFTSAIRILIYFFCNPVIRSDIRNFFYTNGEVNL	379	20	0	0.7824	Cni-C54D10.5;FL83_19915;C54D10.5;FL82_11187;Acey_s0106.g3747;CAEBREN_09962;NECAME_14344;CAEBREN_03251;NBR_LOCUS18703;FL83_19915;C54D10.5;Acey_s0106.g3747;FL82_11187;X798_00701;Cni-C54D10.5;ACOC_LOCUS68;CRE_27114;WR25_02169;X798_00701;Acey_s0106.g3747;CBG23488;ANCCEY_02502;CRE_27114;ACOC_LOCUS68;ANCCAN_05694;WR25_02169;Acey_s0106.g3747;CBG23488;ANCCAN_05694;CAEBREN_09962;ANCCEY_02502;CAEBREN_03251…	GO:0016020-IEA;GO:0016021-IEA	membrane-IEA;integral component of membrane-IEA	1	GO:0016021	integral component of membrane	-	-	IPR017452	HOMOLOGOUS_SUPERFAMILY;HOMOLOGOUS_SUPERFAMILY;HOMOLOGOUS_SUPERFAMILY;DOMAIN;DOMAIN;DOMAIN	CH domain superfamily;CH domain superfamily;CH domain superfamily;GPCR, rhodopsin-like, 7TM;GPCR, rhodopsin-like, 7TM;GPCR, rhodopsin-like, 7TM	G3DSA:1.20.1070.10 (GENE3D);PTHR46709:SF14 (PANTHER);PTHR46709 (PANTHER);PS50262 (PROSITE_PROFILES);cd14978 (CDD);SSF81321 (SUPERFAMILY)	;integral component of membrane;
transcript_ACOC_0000006701-mRNA-1	G_PROTEIN_RECEP_F1_2 domain-containing protein	MLSNGSVEDEMDPLCAQYETYTTVRFIFITIATVIACLGTAGNLLLMYIFAAKKTKITPATLYPTLLAFLDFAICLEYLLLFGVDAAVSFLRIESLFLLYYMYIIPAYVASRITQLAIPYMLIFATVERLVWTSGKMSKKLGTVAVRGFWSPMTIVQPLVLDFVHICSRSRFLLAMNSTSGRYFTAIISLLVCVILRLPTAFATEVAVYPQCEDFFRTMTTQPRTWTYDSEIYYFFDFHLMTIAQTVVPFVILLALNIVRFTFLQFFPYLTLSIRSMKKVSASVRCAIMTMVAIVASYLISNTLHLILTVMERSDHPLLHDTEDPLLSSTFHTFFSDSVSFVYMFTSAIRILIYFFCNPVIRSDIRNFFYTNGEVNL	377	20	0	0.7008	Cni-C54D10.5;FL83_19915;C54D10.5;FL82_11187;Acey_s0106.g3747;CAEBREN_09962;NECAME_14344;CAEBREN_03251;NBR_LOCUS18703;FL83_19915;C54D10.5;Acey_s0106.g3747;FL82_11187;Cni-C54D10.5;DME_LOCUS4140;ACOC_LOCUS68;CRE_27114;WR25_02169;DME_LOCUS4140;Acey_s0106.g3747;CBG23488;ANCCEY_02502;CRE_27114;ACOC_LOCUS68;WR25_02169;Acey_s0106.g3747;CBG23488;CAEBREN_09962;ANCCEY_02502;CAEBREN_03251;NBR_LOCUS18703;NECA…	GO:0016020-IEA;GO:0016021-IEA	membrane-IEA;integral component of membrane-IEA	1	GO:0016021	integral component of membrane	-	-	IPR017452	HOMOLOGOUS_SUPERFAMILY;HOMOLOGOUS_SUPERFAMILY;HOMOLOGOUS_SUPERFAMILY;HOMOLOGOUS_SUPERFAMILY;DOMAIN;DOMAIN;DOMAIN	Cyclin-like superfamily;Cyclin-like superfamily;Cyclin-like superfamily;Cyclin-like superfamily;GPCR, rhodopsin-like, 7TM;GPCR, rhodopsin-like, 7TM;GPCR, rhodopsin-like, 7TM	PTHR46709:SF14 (PANTHER);PTHR46709 (PANTHER);PTHR46709:SF14 (PANTHER);PTHR46709 (PANTHER);PS50262 (PROSITE_PROFILES);cd14978 (CDD);SSF81321 (SUPERFAMILY)	;integral component of membrane;
MSTRG.57.1	CNH domain protein	MAEAEDGGGIGRLSRLEANYLNGPSKSSTALSFEALLDTLICLYDECCSSTLRKEKCVAEFVESVKAVVTQAKELRLCRDDFELLKVIGKGAFGEVAVVRMRGVGEIYAMKILNKWEMLKRAETACFREERDVLVYGDRRWITNLHFAFQDEKNLYFVMDYYVGGDMLTLLSKFEDRIPETMARFYIAEMVLAIDSVHNLGYVHRDVKPDNVLLDIQGHIRLADFGSCLRLLPDGTVASNVAVGTPDYISPEILRAMEDGKGHYGKECDWWSLGICMYEMLYGNTPFYSERLIDTYGKIMSHQDMLDFPDEDIDWTISEEAKDLIRRLICPREVRLGKGGFADFRDHPFFVGIDWAQIRDSDPPYHPEVSSPTDTSNFDVDICEDDFTPCETQPPRVTA…	1744	20	0	0.7928	Acey_s0106.g3743;mrck-1;Bma-mrck-1;Cni-mrck-1;Cni-mrck-1;NOO_LOCUS2864;ANCCEY_02503;EVEC_LOCUS5433;Bma-mrck-1;Cni-mrck-1;Bma-mrck-1;NAV_LOCUS5507;mrck-1;LOAG_18603;mrck-1;Acey_s0106.g3743;TCLT_LOCUS9525;Bma-mrck-1;LOAG_18603;mrck-1;LOAG_18603;X798_00777;ANCCEY_02503;Acey_s0106.g3743;WR25_25716;NAV_LOCUS5507;mrck-1;WR25_25716;Acey_s0106.g3743;WR25_25716;EVEC_LOCUS5433;EVEC_LOCUS5433;NAV_LOCUS5507;…	GO:0005856-IBA;GO:0000166-IEA;GO:0005737-IDA;GO:0005737-IBA;GO:0005737-IEA;GO:0046872-IEA;GO:0002119-IMP;GO:0002119-IEA;GO:0048598-IGI;GO:0048598-IEA;GO:0016310-IEA;GO:0016740-IEA;GO:0016301-IEA;GO:0035556-IEA;GO:2001137-IMP;GO:2001137-IEA;GO:0018107-IBA;GO:0060562-IMP;GO:0060562-IEA;GO:0031032-IBA;GO:0010172-IGI;GO:0010172-IEA;GO:0009792-IMP;GO:0009792-IGI;GO:0009792-IEA;GO:1903358-IMP;GO:190335…	cytoskeleton-IBA;nucleotide binding-IEA;cytoplasm-IDA;cytoplasm-IBA;cytoplasm-IEA;metal ion binding-IEA;nematode larval development-IMP;nematode larval development-IEA;embryonic morphogenesis-IGI;embryonic morphogenesis-IEA;phosphorylation-IEA;transferase activity-IEA;kinase activity-IEA;intracellular signal transduction-IEA;positive regulation of endocytic recycling-IMP;positive regulation of en…	15	GO:0002119;GO:0004674;GO:0005524;GO:0005737;GO:0005856;GO:0009792;GO:0010172;GO:0018107;GO:0031032;GO:0035556;GO:0043547;GO:0046872;GO:0060562;GO:1903358;GO:2001137	nematode larval development;protein serine/threonine kinase activity;ATP binding;cytoplasm;cytoskeleton;embryo development ending in birth or egg hatching;embryonic body morphogenesis;peptidyl-threonine phosphorylation;actomyosin structure organization;intracellular signal transduction;positive regulation of GTPase activity;metal ion binding;epithelial tube morphogenesis;regulation of Golgi organ…	-	-	IPR017892;IPR001180;IPR000719;IPR002219;IPR011993;IPR031597;IPR002219;IPR001180;IPR000961;IPR001849;IPR000719;IPR000095;IPR002219;IPR011009	DOMAIN;DOMAIN;DOMAIN;DOMAIN;DOMAIN;DOMAIN;HOMOLOGOUS_SUPERFAMILY;DOMAIN;DOMAIN;DOMAIN;DOMAIN;DOMAIN;DOMAIN;DOMAIN;DOMAIN;DOMAIN;DOMAIN;DOMAIN;DOMAIN;DOMAIN;DOMAIN;DOMAIN;DOMAIN;DOMAIN;DOMAIN;DOMAIN;DOMAIN;DOMAIN;DOMAIN;HOMOLOGOUS_SUPERFAMILY;HOMOLOGOUS_SUPERFAMILY;HOMOLOGOUS_SUPERFAMILY	Protein kinase, C-terminal;Protein kinase, C-terminal;Protein kinase, C-terminal;Citron homology (CNH) domain;Protein kinase domain;Protein kinase C-like, phorbol ester/diacylglycerol-binding domain;PH-like domain superfamily;KELK-motif containing domain;KELK-motif containing domain;KELK-motif containing domain;KELK-motif containing domain;KELK-motif containing domain;KELK-motif containing domain…	PF00433 (PFAM);G3DSA:1.10.510.10 (GENE3D);G3DSA:3.30.60.20 (GENE3D);PF00780 (PFAM);PF00069 (PFAM);PF00130 (PFAM);G3DSA:2.30.29.30 (GENE3D);PF15796 (PFAM);G3DSA:3.30.200.20 (GENE3D);mobidb-lite (MOBIDB_LITE);mobidb-lite (MOBIDB_LITE);mobidb-lite (MOBIDB_LITE);mobidb-lite (MOBIDB_LITE);mobidb-lite (MOBIDB_LITE);mobidb-lite (MOBIDB_LITE);mobidb-lite (MOBIDB_LITE);PTHR22988 (PANTHER);PTHR22988:SF66 (…	ATP binding/protein phosphorylation/protein serine/threonine kinase activity;ATP binding/protein phosphorylation/protein kinase activity;intracellular signal transduction;intracellular signal transduction;ATP binding/protein serine/threonine kinase activity/protein phosphorylation;ATP binding/protein phosphorylation/protein kinase activity;intracellular signal transduction;
transcript_ACOC_0000007001-mRNA-1	unnamed protein product	MNTPPLSPTYTTVNRCGPNAEASQSARYTPPRPPVCCLWAGISGGDGGCGDGGGDYVVSEGDGVERAAAVHNPEDSLPATIADDTKDNFAIRMHLEAIQYVVMTVVIVQTKDGVQMDDGVANETHYRRPNRRRPTHLTHTVLGLWLCFILQSIVELLLIRRVDVDVGRRRAEDGQLRLR	179	1	1.1e-129	1	ACOC_LOCUS71;ACOC_LOCUS71	GO:0016020-IEA;GO:0016021-IEA	membrane-IEA;integral component of membrane-IEA	1	GO:0016021	integral component of membrane	-	-	-	-	-	-	-
MSTRG.60.1	zinc finger, C2H2 type	MHPPSSPSPMQEVVSSSGQQQLQNHQHSLMQRLLMGAGGGNGSTHTSSARNGIEDIAARLHKQNGSTSIGVAGNGYYSTDLMSTWGDHLSISNNTPMMHLTCLECGINKNNSEDMEVHLKREHLNWLPFQCPICLSERASDAEMREHLHSSHRKNMNKFIYVDNVTAKRSLQIMMDRALSHAMSRRANHGTGRMSSSTTISPPAAAVNHLAAAMKAHDKLPSLERSRTSPTEVPVTNAAGSRKRHIDESLSTGNTNTDALLASISRATNSRGMEGDVSEDVELIPMFNNKRIKSEFEVDQEQEDGSMIDDSILDNLNPISVLDNVAALFASDGRIEDPCADPHPEKPAKSQSAKALSSAISKKRVLGECSKCQKPVTAGARQMHMFFHLAKDHGTFRFR…	853	20	0	0.7492	sup-37;Cni-sup-37;sup-37;sup-37;PRIPAC_40731;Cni-sup-37;sup-37;PRIPAC_40731	GO:0016020-IEA;GO:0016021-IEA;GO:0010468-IBA;GO:0048557-IEA;GO:0005634-IBA;GO:0005634-IEA	membrane-IEA;integral component of membrane-IEA;regulation of gene expression-IBA;embryonic digestive tract morphogenesis-IEA;nucleus-IBA;nucleus-IEA	1	GO:0110165	cellular anatomical entity	-	-	-	HOMOLOGOUS_SUPERFAMILY;HOMOLOGOUS_SUPERFAMILY;HOMOLOGOUS_SUPERFAMILY;HOMOLOGOUS_SUPERFAMILY;HOMOLOGOUS_SUPERFAMILY;HOMOLOGOUS_SUPERFAMILY;HOMOLOGOUS_SUPERFAMILY;HOMOLOGOUS_SUPERFAMILY;HOMOLOGOUS_SUPERFAMILY;HOMOLOGOUS_SUPERFAMILY;HOMOLOGOUS_SUPERFAMILY	LEM/LEM-like domain superfamily;LEM/LEM-like domain superfamily;LEM/LEM-like domain superfamily;LEM/LEM-like domain superfamily;LEM/LEM-like domain superfamily;LEM/LEM-like domain superfamily;LEM/LEM-like domain superfamily;LEM/LEM-like domain superfamily;LEM/LEM-like domain superfamily;LEM/LEM-like domain superfamily;LEM/LEM-like domain superfamily	G3DSA:3.30.160.60 (GENE3D);mobidb-lite (MOBIDB_LITE);mobidb-lite (MOBIDB_LITE);mobidb-lite (MOBIDB_LITE);mobidb-lite (MOBIDB_LITE);mobidb-lite (MOBIDB_LITE);mobidb-lite (MOBIDB_LITE);mobidb-lite (MOBIDB_LITE);mobidb-lite (MOBIDB_LITE);PTHR24376 (PANTHER);PTHR24376:SF107 (PANTHER)	;
MSTRG.60.2	zinc finger, C2H2 type	MHPPSSPSPMQEVVSSSGQQQLQNHQHSLMQRLLMGAGGGNGSTHTSSARNGIEDIAARLHKQNGSTSIGVAGNGYYSTDLMSTWGDHLSISNNTPMMHLTCLECGINKNNSEDMEVHLKREHLNWLPFQCPICLSERASDAEMREHLHSSHRKNMNKFIYVDNVTAKRSLQIMMDRALSHAMSRRANHGTGRMSSSTTISPPAAAVNHLAAAMKAHDKLPSLERSRTSPTEVPVTNAAGSRKRHIDESLSTGNTNTDALLASISRATNSRGMEGDVSEDVELIPMFNNKRIKSEFEVDQEQEDGSMIDDSILDNLNPISVLDNVAALFASDGRIEDPCADPHPEKPAKSQSAKALSSAISKKRVLGECSKCQKPVTAGARQMHMFFHLAKDHGTFRFR…	911	20	0	0.7104	sup-37;Cni-sup-37;sup-37;sup-37;PRIPAC_40731;Cni-sup-37;sup-37;PRIPAC_40731	GO:0016020-IEA;GO:0016021-IEA;GO:0010468-IBA;GO:0048557-IEA;GO:0005634-IBA;GO:0005634-IEA	membrane-IEA;integral component of membrane-IEA;regulation of gene expression-IBA;embryonic digestive tract morphogenesis-IEA;nucleus-IBA;nucleus-IEA	1	GO:0110165	cellular anatomical entity	-	-	-	HOMOLOGOUS_SUPERFAMILY;HOMOLOGOUS_SUPERFAMILY;HOMOLOGOUS_SUPERFAMILY;HOMOLOGOUS_SUPERFAMILY;HOMOLOGOUS_SUPERFAMILY;HOMOLOGOUS_SUPERFAMILY;HOMOLOGOUS_SUPERFAMILY;HOMOLOGOUS_SUPERFAMILY;HOMOLOGOUS_SUPERFAMILY;HOMOLOGOUS_SUPERFAMILY;HOMOLOGOUS_SUPERFAMILY;HOMOLOGOUS_SUPERFAMILY	LEM/LEM-like domain superfamily;LEM/LEM-like domain superfamily;LEM/LEM-like domain superfamily;LEM/LEM-like domain superfamily;LEM/LEM-like domain superfamily;LEM/LEM-like domain superfamily;LEM/LEM-like domain superfamily;LEM/LEM-like domain superfamily;LEM/LEM-like domain superfamily;LEM/LEM-like domain superfamily;LEM/LEM-like domain superfamily;LEM/LEM-like domain superfamily	G3DSA:3.30.160.60 (GENE3D);mobidb-lite (MOBIDB_LITE);mobidb-lite (MOBIDB_LITE);mobidb-lite (MOBIDB_LITE);mobidb-lite (MOBIDB_LITE);mobidb-lite (MOBIDB_LITE);mobidb-lite (MOBIDB_LITE);mobidb-lite (MOBIDB_LITE);mobidb-lite (MOBIDB_LITE);mobidb-lite (MOBIDB_LITE);PTHR24376 (PANTHER);PTHR24376:SF107 (PANTHER)	;
transcript_ACOC_0000007101-mRNA-1	zinc finger, C2H2 type	MHPPSSPSPMQEVVSSSGQQQLQNHQHSLMQRLLMGAGGGNGSTHTSSARNGIEDIAARLHKQNGSTSIGVAGNGYYSTDLMSTWGDHLSISNNTPMMHLTCLECGINKNNSEDMEVHLKREHLNWLPFQCPICLSERASDAEMREHLHSSHRKNMNKFIYVDNVTAKRSLQIMMDRALSHAMSRRANHGTGRMSSSTTISPPAAAKLPSLERSRTSPTEVPVTNAAGSRKRHIDESLSTGNTNTDALLASISRATNSRGMEGDVSEDVELIPMFNNKRIKSEFEVDQEQEDGSMIDDSILDNLNPISVLDNVAALFASDGRIEDPCADPHPEKPAKSQSAKALSSALPLSFCVPIIPHSNVRLKELDFLLFQTFRFRCLFEGCTVEHYRKDQMENHQS…	869	20	0	0.6881	sup-37;Cni-sup-37;Cni-sup-37;sup-37;sup-37;sup-37	GO:0016020-IEA;GO:0016021-IEA;GO:0010468-IBA;GO:0048557-IEA;GO:0005634-IBA;GO:0005634-IEA	membrane-IEA;integral component of membrane-IEA;regulation of gene expression-IBA;embryonic digestive tract morphogenesis-IEA;nucleus-IBA;nucleus-IEA	1	GO:0110165	cellular anatomical entity	-	-	-	DOMAIN;DOMAIN;DOMAIN;DOMAIN;DOMAIN;DOMAIN;DOMAIN;DOMAIN;DOMAIN;DOMAIN;DOMAIN;DOMAIN;DOMAIN;DOMAIN	FMP27, C-terminal;FMP27, C-terminal;FMP27, C-terminal;FMP27, C-terminal;FMP27, C-terminal;FMP27, C-terminal;FMP27, C-terminal;FMP27, C-terminal;FMP27, C-terminal;FMP27, C-terminal;FMP27, C-terminal;FMP27, C-terminal;FMP27, C-terminal;FMP27, C-terminal	G3DSA:3.30.160.60 (GENE3D);mobidb-lite (MOBIDB_LITE);mobidb-lite (MOBIDB_LITE);mobidb-lite (MOBIDB_LITE);mobidb-lite (MOBIDB_LITE);mobidb-lite (MOBIDB_LITE);mobidb-lite (MOBIDB_LITE);mobidb-lite (MOBIDB_LITE);mobidb-lite (MOBIDB_LITE);mobidb-lite (MOBIDB_LITE);mobidb-lite (MOBIDB_LITE);mobidb-lite (MOBIDB_LITE);PTHR24403:SF67 (PANTHER);PTHR24403 (PANTHER)	;
MSTRG.61.1	cathepsin B-like cysteine proteinase	MAGPGLLRKAQPQRKILLISLLFTLLEGGIGSDSSEDNDNFYLSGRRFTLDRFRNRHIPREAEELTGKQLIDYVNRKQKLWKAKKHRRFVHYPDRTKWGLMGVNHVHLSVKAKQHLSSTKDLDIDIPETFDARQHWSNCQSIKNIRDQSSCGSCWAFGAVEAMSDRICIASNEKIQVTLSADDLLSCCRTCGFGCEGGDPMLAWQYWVDHGIVTGSNFTVNQGCKPYPFPPCEHHSNKTRFDPCRHDLYPTPKCSKKCVPSYKEKNYDDDKFYGRTAYGVKNDVVAIQKEVLTHGPVEVAFEVYEDFLHYAGGIYVHTGGKLGGGHAVKLIGWGIDQGTPYWLIANSWNTDWGEDGFFRILRGVDECGIESGVVGGVPKLTNIQRRGYIENYAWEDDDF	399	20	0	0.8559	Acey_s0897.g2931;pXY14;WR25_16296;HPBE_LOCUS18300;CAEBREN_13756;FL82_01648;cpr-6;CAEBREN_13756;Cre-cpr-6;TELCIR_10739;GCK72_024615;pXY14;cpr-6;FL83_00324;TELCIR_10739;cpr-6;pXY14;CAEBREN_13756;cpr-6;ACOC_LOCUS73;cpr-6;Cni-cpr-6;cpr-6;cpr-6;FL83_00324;NBR_LOCUS8906;Cni-cpr-6;E5KEA9;ACOC_LOCUS73;Cre-cpr-6;FL82_01648;FL81_02590;NBR_LOCUS8906;E5KEA9;cpr-6;Cre-cpr-6;FL81_02590;WR25_16296;Acey_s0897.g2…	GO:0005615-IBA;GO:0008233-IEA;GO:0006508-IEA;GO:0004197-IBA;GO:0008234-IEA;GO:0005764-IDA;GO:0005764-IBA;GO:0005764-IEA;GO:0051603-IBA;GO:0016787-IEA	extracellular space-IBA;peptidase activity-IEA;proteolysis-IEA;cysteine-type endopeptidase activity-IBA;cysteine-type peptidase activity-IEA;lysosome-IDA;lysosome-IBA;lysosome-IEA;proteolysis involved in cellular protein catabolic process-IBA;hydrolase activity-IEA	4	GO:0004197;GO:0005615;GO:0005764;GO:0051603	cysteine-type endopeptidase activity;extracellular space;lysosome;proteolysis involved in cellular protein catabolic process	EC:3.4.22	Acting on peptide bonds (peptidases)	IPR000668;IPR000668;IPR038765	DOMAIN;DOMAIN;DOMAIN;DOMAIN;DOMAIN;DOMAIN;HOMOLOGOUS_SUPERFAMILY	Peptidase C1A, papain C-terminal;Peptidase C1A, papain C-terminal;Peptidase C1A, papain C-terminal;Peptidase C1A, papain C-terminal;Peptidase C1A, papain C-terminal;Peptidase C1A, papain C-terminal;Papain-like cysteine peptidase superfamily	PR00705 (PRINTS);PF00112 (PFAM);G3DSA:3.90.70.10 (GENE3D);PTHR12411 (PANTHER);PTHR12411:SF613 (PANTHER);cd02620 (CDD);SSF54001 (SUPERFAMILY)	cysteine-type peptidase activity/proteolysis;cysteine-type peptidase activity/proteolysis;
MSTRG.62.1	hypothetical protein Y032_0349g3197	MRPPPFFFTQAFGNVVIILALSNHVLPLLHFNAGSINPTSFGSKSLVLNDIKSKKVTQTQNNGSTPNNVAAKLSHSMRLLHTTPIPITSAITTSTTNTTSAATQSVASVMKTTTTSMIGLGGEDTPYNQKREKKSDQSILITLLWLIAVAVIIISISYVYYDHRKSRHRQMNNSAPKESPEVEKTITKQSKLSTKRKKLKKKPRQIQAAKLNMEEFKKKGPLVLQAAFRGDIKHQLDEDKSVSLRGLNFDPNQNSIVWIGTEVEHVEGQSPPKSSGYDGILNTMKTQSIIGVNAKKTSETKTKQSTTPSNGSKKSTESSALQHKASTSR	329	20	2.1e-33	0.7151	DICVIV_05333;Acey_s0016.g2913;Acey_s0073.g761;Acey_s0349.g3197;Acey_s0073.g761;HPBE_LOCUS1761;HPBE_LOCUS1761;Acey_s0349.g3197;DICVIV_13478;Acey_s0016.g2913;DICVIV_13478;DICVIV_05333	GO:0016020-IEA;GO:0016021-IEA;GO:0097502-IEA;GO:0004377-IEA	membrane-IEA;integral component of membrane-IEA;mannosylation-IEA;GDP-Man:Man3GlcNAc2-PP-Dol alpha-1,2-mannosyltransferase activity-IEA	1	GO:0016020	membrane	-	-	-	HOMOLOGOUS_SUPERFAMILY	LEM/LEM-like domain superfamily	mobidb-lite (MOBIDB_LITE)	-
transcript_ACOC_0000007301-mRNA-1	unnamed protein product	MLVVVVFITLATDCVAADVVFVLKEKVTVDAILVIGIIDNVAGKVTVILNDVVSTVEVVMALVIGIGVVLVVVVVGVVVVVVVVGVVVVVVVVGVVVVVVVVGVVVVVVVVGVVVVVVVVGVVVVVVVVGVVVVVVVVGVVVLVVVVFAMRVGSFLCCFLSVCVRLFLSVSFIGAANPINTSLSFPAKSGEMFVKKK	197	1	4.5e-105	1	ACOC_LOCUS74;ACOC_LOCUS74	GO:0016020-IEA;GO:0016021-IEA	membrane-IEA;integral component of membrane-IEA	1	GO:0016021	integral component of membrane	-	-	-	-	-	-	-
MSTRG.64.1	hypothetical protein Angca_000177	MLTLTILSLLSILPSMLIALKCHQVATANLASPPETQPTECIAGSLACVKLIDYTSKTFSKQCQQFNCTAGTLMNAPAQCTNTSQLGRESMTCCCYGDGCNSAMVNSMWLVIATIILPFVGSTILI	126	20	5.3e-72	0.7834	Acey_s0633.g887;Acey_s0633.g887	GO:0016020-IEA;GO:0016021-IEA	membrane-IEA;integral component of membrane-IEA	1	GO:0016021	integral component of membrane	-	-	-	HOMOLOGOUS_SUPERFAMILY;HOMOLOGOUS_SUPERFAMILY	KICSTOR complex protein C12orf66-like, central domain superfamily;KICSTOR complex protein C12orf66-like, central domain superfamily	PTHR34721:SF11 (PANTHER);PTHR34721 (PANTHER)	;
transcript_ACOC_0000007401-mRNA-1	unnamed protein product	MLTLTILSLLSILPSMLIALKCHQVATANLASPPETQPTECIAGSLACVKLIDYTSKTFSKQCQQFNCTVSFLTENKTSSDSSNISDVINAGSHGDSEHQKTTVAPFRNDGEQGRSH	117	20	3.7e-81	0.8131	Acey_s0633.g887;Acey_s0633.g887	GO:0016020-IEA;GO:0016021-IEA	membrane-IEA;integral component of membrane-IEA	1	GO:0016021	integral component of membrane	-	-	-	FAMILY;FAMILY;FAMILY;FAMILY	Bardet-Biedl syndrome 1 protein;Bardet-Biedl syndrome 1 protein;Bardet-Biedl syndrome 1 protein;Bardet-Biedl syndrome 1 protein	mobidb-lite (MOBIDB_LITE);mobidb-lite (MOBIDB_LITE);PTHR34721 (PANTHER);PTHR34721:SF11 (PANTHER)	;
MSTRG.65.1	astacin	MMALFTPWLLFACLSVAKLVLGRGKVIDIFDGKGDILQLNEPDGFHHDYASSVFLNAILSNSRRKWNLRDSNGNIVIPYVIGGGYEGYEINTIKQAMMRIEANTCIRFRPRSSEWDYIFIVNRDGEGCYTSVGRQNGRSILVLEANDDNTCMETHIVQHELLHVIGLWHEHMRYDRDQYITVFRQNIAPGYASQFKKISSSESTVYGLPYDYTSIMHYAKTAFAIPGTITMKTRDPRYMNVIGRQRDASRSDYLKVCQIYGCNQCNGEGTRPEGGEKCIDKFSQLCVVVKQHGLLDCNGNSKGYCCATCKAITQ	314	20	0	0.675	ANCCAN_10719;ANCCEY_02129;ANCCEY_02129;OESDEN_06846;OESDEN_01067;Acey_s0189.g1206;ACOC_LOCUS2444;ANCCAN_10719;ANCCAN_10719;NECAME_11360;ACOC_LOCUS2444;OESDEN_06846;DICVIV_08938;DICVIV_08938;OESDEN_01067;HPBE_LOCUS9953;NECAME_11360;DICVIV_01388;ACOC_LOCUS10247;OESDEN_06539;ANCCEY_02129;ACOC_LOCUS2444;ANCCEY_02129;HPBE_LOCUS9953;OESDEN_01067;OESDEN_06539;OESDEN_06846;Acey_s0189.g1206;ACOC_LOCUS2444…	GO:0008270-IEA;GO:0046872-IEA;GO:0008233-IEA;GO:0006508-IEA;GO:0008237-IEA;GO:0004222-IEA;GO:0016787-IEA	zinc ion binding-IEA;metal ion binding-IEA;peptidase activity-IEA;proteolysis-IEA;metallopeptidase activity-IEA;metalloendopeptidase activity-IEA;hydrolase activity-IEA	3	GO:0004222;GO:0006508;GO:0008270	metalloendopeptidase activity;proteolysis;zinc ion binding	EC:3.4.24	Acting on peptide bonds (peptidases)	IPR001506;IPR024079;IPR001506;IPR034035	DOMAIN;HOMOLOGOUS_SUPERFAMILY;DOMAIN;DOMAIN;DOMAIN;DOMAIN;DOMAIN;DOMAIN	Peptidase M12A;Metallopeptidase, catalytic domain superfamily;Peptidase M12A;Peptidase M12A;Peptidase M12A;Peptidase M12A;Astacin-like metallopeptidase domain;Astacin-like metallopeptidase domain	PR00480 (PRINTS);G3DSA:3.40.390.10 (GENE3D);PF01400 (PFAM);PTHR10127:SF835 (PANTHER);PTHR10127 (PANTHER);PS51864 (PROSITE_PROFILES);cd04280 (CDD);SSF55486 (SUPERFAMILY)	metalloendopeptidase activity/proteolysis;metallopeptidase activity;metalloendopeptidase activity/proteolysis;proteolysis/metalloendopeptidase activity;
transcript_ACOC_0000007501-mRNA-1	astacin	MATVRLPQCRKACAGKEGYEINTIKQAMMRIEANTCIRFRPRSSEWDYIFIVNRDGEGCMETHIVQHELLHVIGLWHEHMRYDRDQYITVFRQNIAPGYASQFKKISSSESTVYGLPYDYTSIMHYAKTAFAIPGTITMKTRDPRYMNVIGRQRDASRSDYLKVCQIYGCNQCNGEGTRPEGGESNHYWIFFSTQAFLPQKTNELLPICLNNLVECIDKFSQLCVVVKQHGLLDCNGNSKGYCCATCKAITQ	252	20	0	0.6375	ANCCAN_10719;ANCCEY_02129;ANCCEY_02129;OESDEN_06846;Acey_s0189.g1206;ACOC_LOCUS2444;ANCCAN_10719;ANCCAN_10719;NECAME_11360;ACOC_LOCUS2444;DICVIV_14133;OESDEN_06846;DICVIV_14133;DICVIV_08938;ANCDUO_03458;DICVIV_08938;HPBE_LOCUS9953;NECAME_11360;DICVIV_01388;ACOC_LOCUS10247;OESDEN_06539;ANCCEY_02129;ACOC_LOCUS2444;ANCCEY_02129;HPBE_LOCUS9953;DICVIV_14133;OESDEN_06539;OESDEN_06846;Acey_s0189.g1206;A…	GO:0008270-IEA;GO:0046872-IEA;GO:0008233-IEA;GO:0006508-IEA;GO:0008237-IEA;GO:0004222-IEA;GO:0016787-IEA	zinc ion binding-IEA;metal ion binding-IEA;peptidase activity-IEA;proteolysis-IEA;metallopeptidase activity-IEA;metalloendopeptidase activity-IEA;hydrolase activity-IEA	3	GO:0004222;GO:0006508;GO:0008270	metalloendopeptidase activity;proteolysis;zinc ion binding	EC:3.4.24	Acting on peptide bonds (peptidases)	IPR001506;IPR024079;IPR001506;IPR034035	DOMAIN;HOMOLOGOUS_SUPERFAMILY;DOMAIN;DOMAIN;DOMAIN;DOMAIN;DOMAIN	Peptidase M12A;Metallopeptidase, catalytic domain superfamily;Peptidase M12A;Peptidase M12A;Peptidase M12A;Astacin-like metallopeptidase domain;Astacin-like metallopeptidase domain	PR00480 (PRINTS);G3DSA:3.40.390.10 (GENE3D);PF01400 (PFAM);PTHR10127 (PANTHER);PS51864 (PROSITE_PROFILES);cd04280 (CDD);SSF55486 (SUPERFAMILY)	metalloendopeptidase activity/proteolysis;metallopeptidase activity;metalloendopeptidase activity/proteolysis;proteolysis/metalloendopeptidase activity;
transcript_ACOC_0000007701-mRNA-1	RRM domain-containing protein	MRASSTSSTDSNGFPVKDPDALKLFVGQIPRNLEEKDLRHLFEQFGKIYEFTILKDKYTGSLSQFKLDLKEFRKKQTFLKHF	82	20	9.1e-53	0.9908	unc-75;Cre-unc-75;ANCCAN_10717;Cre-unc-75;TELCIR_11469;unc-75;ANCDUO_03460;unc-75;Cre-unc-75;unc-75;unc-75;ANCCEY_02128;unc-75;Cre-unc-75;unc-75;ANCDUO_03460;WR25_18049;unc-75;Cre-unc-75;unc-75;unc-75;unc-75;unc-75;HPBE_LOCUS13435;unc-75;TELCIR_03844;TELCIR_11469;FL83_15888;Cre-unc-75;unc-75;unc-75;FL82_16997;NBR_LOCUS12239;FL81_18924;unc-75;TELCIR_03844;WR25_18049;Cre-unc-75;unc-75;unc-75;ACOC_L…	GO:0003723-IBA;GO:0003723-IEA;GO:0005737-IBA;GO:0016071-ISS;GO:0000381-IBA;GO:0000381-IMP;GO:0000381-IEA;GO:0003727-IDA;GO:0003727-IEA;GO:0032224-IMP;GO:0032224-IEA;GO:0003729-ISS;GO:0003729-IBA;GO:1990904-IBA;GO:0007271-IMP;GO:0007271-IEA;GO:0016607-IDA;GO:0016607-IEA;GO:0032230-IMP;GO:0032230-IEA;GO:0045202-IEA;GO:0045664-IMP;GO:0045664-IEA;GO:0006376-IBA;GO:0005634-IBA;GO:0003676-IEA	RNA binding-IBA;RNA binding-IEA;cytoplasm-IBA;mRNA metabolic process-ISS;regulation of alternative mRNA splicing, via spliceosome-IBA;regulation of alternative mRNA splicing, via spliceosome-IMP;regulation of alternative mRNA splicing, via spliceosome-IEA;single-stranded RNA binding-IDA;single-stranded RNA binding-IEA;positive regulation of synaptic transmission, cholinergic-IMP;positive regulati…	11	GO:0000381;GO:0003727;GO:0003729;GO:0005737;GO:0006376;GO:0016607;GO:0032224;GO:0032230;GO:0045202;GO:0045664;GO:1990904	regulation of alternative mRNA splicing, via spliceosome;single-stranded RNA binding;mRNA binding;cytoplasm;mRNA splice site selection;nuclear speck;positive regulation of synaptic transmission, cholinergic;positive regulation of synaptic transmission, GABAergic;synapse;regulation of neuron differentiation;ribonucleoprotein complex	-	-	IPR000504;IPR012677;IPR000504;IPR035979	DOMAIN;HOMOLOGOUS_SUPERFAMILY;HOMOLOGOUS_SUPERFAMILY;HOMOLOGOUS_SUPERFAMILY;DOMAIN;HOMOLOGOUS_SUPERFAMILY	RNA recognition motif domain;Nucleotide-binding alpha-beta plait domain superfamily;Nucleotide-binding alpha-beta plait domain superfamily;Nucleotide-binding alpha-beta plait domain superfamily;RNA recognition motif domain;RNA-binding domain superfamily	PF00076 (PFAM);G3DSA:3.30.70.330 (GENE3D);PTHR24012:SF686 (PANTHER);PTHR24012 (PANTHER);PS50102 (PROSITE_PROFILES);SSF54928 (SUPERFAMILY)	nucleic acid binding;nucleic acid binding;nucleic acid binding
transcript_ACOC_0000007801-mRNA-1	CUGBP Elav-like family member 3-A	MHKGCAFLTYCHRDSAMKCQAALHDQKTLPGVSSPDYLVLSGLVKKSSTGAVIFLQSSFNVKNDFSLRINDDIVLFRCSQKLQ	83	20	5.4e-55	0.9041	tnrc4-a;DICVIV_08940;tnrc4-a;tnrc4-a;ANCCAN_10717;TELCIR_03844;tnrc4-a;ANCDUO_03460;tnrc4-a;tnrc4-a;ANCCEY_02128;D917_08117;tnrc4-a;tnrc4-a;D917_08117;tnrc4-a;BTMF_LOCUS11439;ANCDUO_03460;tnrc4-a;WBA_LOCUS6437;DICVIV_08940;tnrc4-a;tnrc4-a;tnrc4-a;ANCCEY_02128;HPBE_LOCUS13435;tnrc4-a;tnrc4-a;tnrc4-a;OFLC_LOCUS3910;ANCCAN_10717;TELCIR_03844;HPBE_LOCUS13435;NBR_LOCUS12239;BTMF_LOCUS11439;OFLC_LOCUS3…	GO:0003723-IEA;GO:0003676-IEA	RNA binding-IEA;nucleic acid binding-IEA	1	GO:0003723	RNA binding	-	-	-	HOMOLOGOUS_SUPERFAMILY;HOMOLOGOUS_SUPERFAMILY	LEM/LEM-like domain superfamily;LEM/LEM-like domain superfamily	PTHR24012:SF716 (PANTHER);PTHR24012 (PANTHER)	;
MSTRG.68.1	HrETR-1 protein	MHKGCAFLTYCHRDSAMKCQAALHDQKTLPGMNRAMQVKPADTESRPTSPKDKIDDKKLFVGMLSKHQSEEEVRALFLPFGVLEEVTVLRGADGASKGCAFVKFKNALDAQMAITALHGSQTMAGASSSLVVKYADTEKERQVRRMQQMAAQMGLLNPVLVNQVGAQYSAAYQQILQQQALANVAAAQSSAAYMPLVQHPALMQMPSATPLLTQQGLTQIGLAAGSQMAIPSLQAQHHFQALQALVAQQQHVQPEFQCSRYGILIESAPSSTNGEAAFAIPNAGYPIINMDHHNNVALQHLAQLHQQAAVIPLVTPKEVLGPEGCNLFIYHLPQEFGDAELIQMFAPFGNVISAKVFVDRATNQSKCFGFVSYDSLAASQAAIAAMNGFQIGMKRLKSA…	427	20	0	0.7874	LOAG_18405;HPLM_LOCUS7569;ANCCAN_10716;NECAME_11358;DICVIV_08941;Bm1_27610;BM_BM2262;L596_007821;WR25_18049;TELCIR_11469;ANCCEY_02127;WR25_18049;ASIM_LOCUS12096;WR25_18049;WR25_18049;Acey_s0189.g1211;ASIM_LOCUS12096;WR25_18049;Acey_s0189.g1211;WR25_18049;WR25_18049;LOAG_18405;Bm1_27610;ANCCEY_02127;BPAG_LOCUS9176;WR25_18049;HPLM_LOCUS7569;L596_007821;DICVIV_08941;NECAME_11358;BM_BM2262;L596_00782…	GO:0003723-IEA;GO:1990904-IEA;GO:0003676-IEA	RNA binding-IEA;ribonucleoprotein complex-IEA;nucleic acid binding-IEA	1	GO:0003723	RNA binding	-	-	IPR000504;IPR012677;IPR012677;IPR012677;IPR000504;IPR000504;IPR035979;IPR035979	DOMAIN;HOMOLOGOUS_SUPERFAMILY;HOMOLOGOUS_SUPERFAMILY;HOMOLOGOUS_SUPERFAMILY;HOMOLOGOUS_SUPERFAMILY;HOMOLOGOUS_SUPERFAMILY;DOMAIN;DOMAIN;HOMOLOGOUS_SUPERFAMILY;HOMOLOGOUS_SUPERFAMILY	RNA recognition motif domain;Nucleotide-binding alpha-beta plait domain superfamily;Nucleotide-binding alpha-beta plait domain superfamily;Nucleotide-binding alpha-beta plait domain superfamily;Nucleotide-binding alpha-beta plait domain superfamily;Nucleotide-binding alpha-beta plait domain superfamily;RNA recognition motif domain;RNA recognition motif domain;RNA-binding domain superfamily;RNA-bi…	PF00076 (PFAM);G3DSA:3.30.70.330 (GENE3D);G3DSA:3.30.70.330 (GENE3D);G3DSA:3.30.70.330 (GENE3D);PTHR24012:SF716 (PANTHER);PTHR24012 (PANTHER);PS50102 (PROSITE_PROFILES);PS50102 (PROSITE_PROFILES);SSF54928 (SUPERFAMILY);SSF54928 (SUPERFAMILY)	nucleic acid binding;nucleic acid binding;nucleic acid binding;nucleic acid binding;nucleic acid binding
MSTRG.68.3	RNA recognition motif domain containing protein	MKCQAALHDQKTLPGMNRAMQVKPADTESRPTSPKDKIDDKKLFVGMLSKHQSEEEVRALFLPFGVLEEVTVLRGADGASKGCAFVKFKNALDAQMAITALHGSQTMAGASSSLVVKYADTEKERQVRRMQQMAAQMGLLNPVLVNQVGAQYSAAYQQILQQQALANVAAAQSSAAYMPLVQHPALMQMPSATPLLTQQGLTQIGLAAGSQMAIPSLQAQHHFQALQALVAQQQHVQPEFQCSPPSSTNGEAAFAIPNAGYPIINMDHHNNVALQHLAQLHQQAAVIPLVTPKEVLGPEGCNLFIYHLPQEFGDAELIQMFAPFGNVISAKVFVDRATNQSKCFGFVSYDSLAASQAAIAAMNGFQIGMKRLKSACCATLSPPSRPYPRDFVRRPPPFI…	403	20	0	0.7972	HPLM_LOCUS7569;ANCCAN_10716;TCNE_LOCUS710;NECAME_11358;DICVIV_08941;L596_007821;CELF3;WR25_18049;TELCIR_11469;CELF3;TCNE_LOCUS710;ANCCEY_02127;WR25_18049;ASIM_LOCUS12096;TCNE_LOCUS710;WR25_18049;WR25_18049;Acey_s0189.g1211;ASIM_LOCUS12096;WR25_18049;Acey_s0189.g1211;TCNE_LOCUS710;WR25_18049;WR25_18049;ANCCEY_02127;HPLM_LOCUS7569;WR25_18049;L596_007821;DICVIV_08941;NECAME_11358;L596_007821;TELCIR_…	GO:0003723-IEA;GO:0016020-IEA;GO:0016021-IEA;GO:1990904-IEA;GO:0003676-IEA	RNA binding-IEA;membrane-IEA;integral component of membrane-IEA;ribonucleoprotein complex-IEA;nucleic acid binding-IEA	1	GO:0003723	RNA binding	-	-	IPR000504;IPR012677;IPR012677;IPR000504;IPR000504;IPR035979	DOMAIN;HOMOLOGOUS_SUPERFAMILY;HOMOLOGOUS_SUPERFAMILY;HOMOLOGOUS_SUPERFAMILY;HOMOLOGOUS_SUPERFAMILY;HOMOLOGOUS_SUPERFAMILY;DOMAIN;DOMAIN;HOMOLOGOUS_SUPERFAMILY	RNA recognition motif domain;Nucleotide-binding alpha-beta plait domain superfamily;Nucleotide-binding alpha-beta plait domain superfamily;Nucleotide-binding alpha-beta plait domain superfamily;Nucleotide-binding alpha-beta plait domain superfamily;Nucleotide-binding alpha-beta plait domain superfamily;RNA recognition motif domain;RNA recognition motif domain;RNA-binding domain superfamily	PF00076 (PFAM);G3DSA:3.30.70.330 (GENE3D);G3DSA:3.30.70.330 (GENE3D);mobidb-lite (MOBIDB_LITE);PTHR24012:SF716 (PANTHER);PTHR24012 (PANTHER);PS50102 (PROSITE_PROFILES);PS50102 (PROSITE_PROFILES);SSF54928 (SUPERFAMILY)	nucleic acid binding;nucleic acid binding;nucleic acid binding;nucleic acid binding
transcript_ACOC_0000007901-mRNA-1	RNA recognition motif domain containing protein	MNRAMQVKPADTESRPTSPKDKLQIDDKKLFVGMLSKHQSEEEVRALFLPFGVLEELVGRGRVCCMQVTVLRGADGASKGCAFVKFKNALDAQMAITALHGSQTMAGASSSLVVKYADTEKERQVRRMQQMAAQMGLLNPVLVNQVGAQYSAAYQQVCQW	160	20	6.9e-116	0.8907	HPLM_LOCUS7569;WR25_18049;ACOC_LOCUS80;WR25_18049;NECAME_11358;DICVIV_08941;WR25_18049;WR25_18049;WR25_18049;TELCIR_11469;ANCCEY_02127;WR25_18049;WR25_18049;Acey_s0189.g1211;WR25_18049;WR25_18049;WR25_18049;Acey_s0189.g1211;WR25_18049;WR25_18049;WR25_18049;WR25_18049;WR25_18049;ANCCEY_02127;WR25_18049;WR25_18049;HPLM_LOCUS7569;WR25_18049;ACOC_LOCUS80;DICVIV_08941;NECAME_11358;TELCIR_11469;HPBE_LO…	GO:0003723-IEA;GO:0003676-IEA	RNA binding-IEA;nucleic acid binding-IEA	1	GO:0003723	RNA binding	-	-	IPR012677;IPR000504;IPR000504;IPR035979	HOMOLOGOUS_SUPERFAMILY;DOMAIN;DOMAIN;DOMAIN;DOMAIN;DOMAIN;HOMOLOGOUS_SUPERFAMILY	Nucleotide-binding alpha-beta plait domain superfamily;RNA recognition motif domain;RNA recognition motif domain;RNA recognition motif domain;RNA recognition motif domain;RNA recognition motif domain;RNA-binding domain superfamily	G3DSA:3.30.70.330 (GENE3D);PF00076 (PFAM);mobidb-lite (MOBIDB_LITE);PTHR24012:SF739 (PANTHER);PTHR24012 (PANTHER);PS50102 (PROSITE_PROFILES);SSF54928 (SUPERFAMILY)	;nucleic acid binding;nucleic acid binding;nucleic acid binding
MSTRG.69.1	Peptide P4	MRTVICALMLVAVYAAPLHDDEKIEEKLKHLQDQLTQLQRQLETPIVKEKQNGRKLLFNEWQPQKRLVAWQPMKRTIDERQPVLHVIEQRLSEVLRAGERLGISPEEVLEDLRHRNQFAE	120	20	2.4e-55	0.7515	nlp-40;nlp-40;Cre-nlp-40;nlp-40;nlp-40;nlp-40;nlp-40;nlp-40;nlp-40;Cre-nlp-40;Cre-nlp-40;nlp-40;nlp-40	GO:0005615-IDA;GO:0005615-IEA;GO:2000294-IMP;GO:2000294-IEA;GO:0031410-IEA;GO:0071855-IC;GO:0007218-IDA;GO:0007218-IEA;GO:0005576-IEA	extracellular space-IDA;extracellular space-IEA;positive regulation of defecation-IMP;positive regulation of defecation-IEA;cytoplasmic vesicle-IEA;neuropeptide receptor binding-IC;neuropeptide signaling pathway-IDA;neuropeptide signaling pathway-IEA;extracellular region-IEA	4	GO:0005615;GO:0007218;GO:0071855;GO:2000294	extracellular space;neuropeptide signaling pathway;neuropeptide receptor binding;positive regulation of defecation	-	-	-	-	-	-	-
MSTRG.69.3	Peptide P4	MRTVICALMLVAVYAAPLHDDEKIEEKLKHLQDQLTQLQRQLETPIVKEKQNGRKLLFNEWQPQKRLVAWQPMKRTIDERQPGFSYR	87	18	1.2e-38	0.7251	nlp-40;nlp-40;Cre-nlp-40;nlp-40;nlp-40;nlp-40;nlp-40;nlp-40;nlp-40;Cre-nlp-40;Cre-nlp-40;nlp-40;nlp-40	GO:0005615-IDA;GO:0005615-IEA;GO:2000294-IMP;GO:2000294-IEA;GO:0031410-IEA;GO:0071855-IC;GO:0007218-IDA;GO:0007218-IEA;GO:0005576-IEA	extracellular space-IDA;extracellular space-IEA;positive regulation of defecation-IMP;positive regulation of defecation-IEA;cytoplasmic vesicle-IEA;neuropeptide receptor binding-IC;neuropeptide signaling pathway-IDA;neuropeptide signaling pathway-IEA;extracellular region-IEA	4	GO:0005615;GO:0007218;GO:0071855;GO:2000294	extracellular space;neuropeptide signaling pathway;neuropeptide receptor binding;positive regulation of defecation	-	-	-	-	-	-	-
MSTRG.70.1	SH2 domain protein	MTGGQLSDQIWYWGNVDKYVVSEIMQEQPEGTFMVRDASSPGDYTLTVRFGNNTKLVRIHVYKGRCGFALESLTHDSVVSLIDFYRTRSLKCYNAQLDVCLKYPLPRRKQSIRTVDPQNTPCVSPSLPTFNADWDLRLGLERLRICQTEVDRAARLFDAVHEEKKLADQLHYEYTQAIVDLDRKVKQIEEAVNTIQNCEEFNDESDLKRLQAFIANCKVMECSIKKLKEERDLVVDRRARVSKAIEDLNLASSHAKGRLVSCHNNRNQCYTELFKKGVPKVKLVSTIELSTGMLEKESMKASELLADIRLAWEPEQYLVNDSSKEAAAALILGTRNRALEKTKGQIPTDGIFLIRPSASQANKLALSVLHGGRVSHCLIEQTSQGWGFENGGVYFVTIG…	426	20	0	0.7245	aap-1;aap-1;Cre-aap-1;aap-1;aap-1;Cre-aap-1;aap-1;aap-1;aap-1;Cre-aap-1;aap-1;aap-1;ACOC_LOCUS83;aap-1;DICVIV_08943;aap-1;aap-1;aap-1;aap-1;aap-1;DICVIV_08943;aap-1;aap-1;aap-1;aap-1;Cre-aap-1;ACOC_LOCUS83;aap-1;aap-1;Cre-aap-1;aap-1;aap-1;aap-1	GO:0040024-IMP;GO:0040024-IGI;GO:0040024-IEA;GO:0043551-IBA;GO:0008286-IBA;GO:0008286-IMP;GO:0008286-IGI;GO:0008286-IEA;GO:0016020-IEA;GO:0008340-IMP;GO:0008340-IEA;GO:0016021-IEA;GO:0046854-IBA;GO:0016310-IEA;GO:0046935-IBA;GO:0016301-IEA;GO:0019901-IPI;GO:0019901-IEA;GO:0005942-IDA;GO:0005942-IBA;GO:0005942-IEA	dauer larval development-IMP;dauer larval development-IGI;dauer larval development-IEA;regulation of phosphatidylinositol 3-kinase activity-IBA;insulin receptor signaling pathway-IBA;insulin receptor signaling pathway-IMP;insulin receptor signaling pathway-IGI;insulin receptor signaling pathway-IEA;membrane-IEA;determination of adult lifespan-IMP;determination of adult lifespan-IEA;integral compo…	6	GO:0005942;GO:0008286;GO:0008340;GO:0016021;GO:0019901;GO:0040024	phosphatidylinositol 3-kinase complex;insulin receptor signaling pathway;determination of adult lifespan;integral component of membrane;protein kinase binding;dauer larval development	-	-	IPR000980;IPR036860;IPR036860;IPR000980;IPR000980;IPR000980;IPR036860;IPR036860	HOMOLOGOUS_SUPERFAMILY;DOMAIN;HOMOLOGOUS_SUPERFAMILY;HOMOLOGOUS_SUPERFAMILY;DOMAIN;DOMAIN;DOMAIN;DOMAIN;DOMAIN;HOMOLOGOUS_SUPERFAMILY;HOMOLOGOUS_SUPERFAMILY	RNA-binding domain superfamily;SH2 domain;SH2 domain superfamily;SH2 domain superfamily;SH2 domain;SH2 domain;SH2 domain;SH2 domain;SH2 domain;SH2 domain superfamily;SH2 domain superfamily	PR00678 (PRINTS);PR00401 (PRINTS);G3DSA:3.30.505.10 (GENE3D);G3DSA:3.30.505.10 (GENE3D);PF00017 (PFAM);PTHR10155:SF10 (PANTHER);PTHR10155 (PANTHER);PS50001 (PROSITE_PROFILES);PS50001 (PROSITE_PROFILES);SSF55550 (SUPERFAMILY);SSF55550 (SUPERFAMILY)	;
transcript_ACOC_0000008201-mRNA-1	SH2 domain protein	MTGGQLSDQIWYWGNVDKYVVSEVLFLLQQIMQEQPEGTFMVRDASSPGDYTLTVRFGNNTKLVRIHVYKGRCGFALESLTHDSVVSLIDFYRTRSLKCYNAQLDVCLKYPLPRRKQSIRTVDPQNTPCVSPSLPTFNADWDLRLGLERLRICQTEVDRAARLFDAVHEEKKLADQLHYEYTQAIVDLDRKVKQIEEAVNTIQNCEEFNDESDLKRLQAFIANCKVMECSIKKLKEERDLVVDRRARVSKAIEDLNLASSHAKGRLVSCHNNRNQCYTELFKKGVPKVKLVSTIELSTGMLEKESMKASELLADIRLAWEPEQYLVNDSSKEAAAALILGTRNRALEKTKGQIPTDGIFLIRPSASQINEISMRMTDVWDRIRAKVLRTFGDHGLLCEE…	643	20	0	0.8467	ACOC_LOCUS83;DICVIV_08943;NBR_LOCUS18702;TELCIR_18426;WR25_10423;WR25_13665;TELCIR_18426;WR25_10423;HPLM_LOCUS4557;Acey_s0189.g1228;DICVIV_08943;Acey_s0189.g1228;tmem106b;ASIM_LOCUS11551;ACOC_LOCUS83;NBR_LOCUS18702;HPLM_LOCUS4557;ASIM_LOCUS11551;tmem106b;WR25_13665	GO:0016020-IEA;GO:0016021-IEA	membrane-IEA;integral component of membrane-IEA	1	GO:0016021	integral component of membrane	-	-	IPR000980;IPR000980;IPR009790;IPR036860;IPR000980;IPR036860	DOMAIN;DOMAIN;FAMILY;HOMOLOGOUS_SUPERFAMILY;HOMOLOGOUS_SUPERFAMILY;HOMOLOGOUS_SUPERFAMILY;DOMAIN;HOMOLOGOUS_SUPERFAMILY	SH2 domain;SH2 domain;Protein of unknown function DUF1356, TMEM106;SH2 domain superfamily;SH2 domain superfamily;SH2 domain superfamily;SH2 domain;SH2 domain superfamily	PR00401 (PRINTS);PF00017 (PFAM);PF07092 (PFAM);G3DSA:3.30.505.10 (GENE3D);PTHR10155:SF10 (PANTHER);PTHR10155 (PANTHER);PS50001 (PROSITE_PROFILES);SSF55550 (SUPERFAMILY)	;
MSTRG.70.3	SH2 domain protein	MNYCSVDGPLLSLLVSWFKFIPNCTACAYFMLLPLVFFSLNVFFALRSMKSEHSVSGDGQTNVNGGSSTSRSLNSDYTELMGGSVPCPSCKGTGRIPKEMEETLVALIPLNDDRLKPKRTWFWVLIGISICFLIASGVIFMLVPRAVDLHSNKPAINIIHVTEHTILPPRIRFHFMNYLNISNANYYIVQVVNTSATIVSKFQPWSNEEIGSGLNTSVVSVAPLSTDRNLLMFNNSVTLTDVVAEYCQAPFSRVTSLYVNMQFDIVVTLVYFNHYEKVSLLTNQQVCCVPSDMETLMREGSNEEEEEEEEEEDMKDDLPVQDEAAENESNENGTELCTAEEQEPEAYADEELLSIASSDLAMADETCEGSDEENLEALTEYVAEEVEQFDIDNFRPGPT…	1679	20	0	0.765	ACOC_LOCUS83;Acey_s0189.g1228;DICVIV_08943;tmem106b;NBR_LOCUS18702;ACOC_LOCUS83;NBR_LOCUS18702;HPLM_LOCUS4557;tmem106b;HPLM_LOCUS4557;Acey_s0189.g1228;DICVIV_08943	GO:0016020-IEA;GO:0016021-IEA	membrane-IEA;integral component of membrane-IEA	1	GO:0016021	integral component of membrane	-	-	IPR009790;IPR009790	FAMILY;FAMILY;FAMILY;FAMILY;FAMILY	Protein of unknown function DUF1356, TMEM106;Protein of unknown function DUF1356, TMEM106;Protein of unknown function DUF1356, TMEM106;Protein of unknown function DUF1356, TMEM106;Protein of unknown function DUF1356, TMEM106	PF07092 (PFAM);mobidb-lite (MOBIDB_LITE);mobidb-lite (MOBIDB_LITE);mobidb-lite (MOBIDB_LITE);PTHR28556 (PANTHER)	;
MSTRG.71.1	CUTicle and epithelial Integrity	MKKTSGEPKAEELPPNFCFSTDDPFYFGPATCHLMHYNMAAYMAGVVEMTMLCGGSFSFWRLYNVNQSMDWWVVFCMFCLTVAGLVTTFLMFYGLKTEQAQLISPKMTFIQIEITILMIFAAFAIVSMAFGINLTHRLFSVFVRIPEMERDFGPIWPFNIAVIAFFAAAICTWMRVLVGGAIDFILDKQFFTNAPSIEMEKTLPRIE	207	20	1.4e-123	0.7494	NBR_LOCUS10755;ANCCAN_01674;Cni-cuti-1;ACOC_LOCUS84;CAEBREN_17788;FL81_17279;Tcan_07368;ANCDUO_18605;cuti-1;NBR_LOCUS10755;PRIPAC_44724;Cni-cuti-1;TCNE_LOCUS10518;Tcan_07368;ANCDUO_18605;FL81_17279;OESDEN_10714;Acey_s0189.g1224;OESDEN_10714;cuti-1;cuti-1;TELCIR_09989;PRIPAC_44724;TCNE_LOCUS10518;TELCIR_09989;SVUK_LOCUS4407;Acey_s0189.g1224;ANCCAN_01674;PRIPAC_44724;CAEBREN_17788;ACOC_LOCUS84;cuti…	GO:0005737-IDA;GO:0005737-IEA;GO:0016020-IEA;GO:0016021-IEA	cytoplasm-IDA;cytoplasm-IEA;membrane-IEA;integral component of membrane-IEA	2	GO:0005737;GO:0016021	cytoplasm;integral component of membrane	-	-	-	-	-	-	-
transcript_ACOC_0000008301-mRNA-1	CUTicle and epithelial Integrity	MKKTSGEPKAEELPPNFCFSTDDPFYFGPATCHLMHYNMAAYMAGVVEMTMLCGGSFSFWRTFSSVTFYGLKTEQAQLISPKMTFIQIEITILMIFAAFAIVSMAFGINLTHRLFSVFVRIPEMERDFGPIWPFNIAVIAFFAAAICTWMRVLVGGAIDFILDKQFFTNAPSIEMEKTLPRIE	183	20	1.7e-133	0.7011	NBR_LOCUS10755;ANCCAN_01674;Cni-cuti-1;TELCIR_14986;ACOC_LOCUS84;CAEBREN_17788;Tcan_07368;FL82_17882;cuti-1;NBR_LOCUS10755;PRIPAC_44724;Cni-cuti-1;TCNE_LOCUS10518;Tcan_07368;OESDEN_10714;Acey_s0189.g1224;FL82_17882;OESDEN_10714;cuti-1;cuti-1;TELCIR_09989;PRIPAC_44724;TCNE_LOCUS10518;TELCIR_09989;SVUK_LOCUS4407;Acey_s0189.g1224;TELCIR_14986;ANCCAN_01674;PRIPAC_44724;CAEBREN_17788;ACOC_LOCUS84;cuti…	GO:0005737-IDA;GO:0005737-IEA;GO:0016020-IEA;GO:0016021-IEA	cytoplasm-IDA;cytoplasm-IEA;membrane-IEA;integral component of membrane-IEA	2	GO:0005737;GO:0016021	cytoplasm;integral component of membrane	-	-	-	-	-	-	-
MSTRG.72.2	TPR_REGION domain-containing protein	MKRFHPLLILARAAVRLSLQSKRYGFVAKRVVAGGLSSTLALSFFSPAPQVEVTEVDLSRPKNFDIIVREADKLYDGYLIENAYNILKKWGSSDCSELLWRLARVLCEKAKLSSDKAERTSLMYEAFAVVKKAIEKEPKGGCFGAHKWYAILLDYVGEIEGNKSRILKSYEVKEHLERALEICSSDATTWHILG	194	20	3.3e-99	0.8034	ANCCEY_02124;ANCCEY_02124	GO:0016020-IEA;GO:0016021-IEA	membrane-IEA;integral component of membrane-IEA	1	GO:0016021	integral component of membrane	-	-	-	HOMOLOGOUS_SUPERFAMILY;HOMOLOGOUS_SUPERFAMILY	Cyclin-like superfamily;Cyclin-like superfamily	PTHR16056 (PANTHER);PTHR16056:SF16 (PANTHER)	;
transcript_ACOC_0000008501-mRNA-1	SPRY domain protein	MGTFTLAYFVRTVFWDKKGYWLTVFPVYHFGRCWDNAGYAKVEMMKVGLRTFWSSIRSC	59	20	5.1e-37	0.7252	ANCCAN_01676;ANCCAN_01676;ANCCAN_01676;ANCCAN_01676;ANCCAN_01676;ANCCAN_01676	GO:0002943-IEA;GO:0017150-IEA;GO:0050660-IEA;GO:0003824-IEA;GO:0008033-IEA;GO:0055114-IEA	tRNA dihydrouridine synthesis-IEA;tRNA dihydrouridine synthase activity-IEA;flavin adenine dinucleotide binding-IEA;catalytic activity-IEA;tRNA processing-IEA;oxidation-reduction process-IEA	4	GO:0002943;GO:0017150;GO:0050660;GO:0055114	tRNA dihydrouridine synthesis;tRNA dihydrouridine synthase activity;flavin adenine dinucleotide binding;oxidation-reduction process	-	-	-	-	-	-	-
MSTRG.73.1	Protein Y38E10A.24	MGTFTLAYFVRTVFWDKKGYWLTVFPVYHFGRCWDNAGYAKVEMMKGRSKMYAERIRAIPKHEDPWKY	68	20	4e-34	0.7817	ASIM_LOCUS11922;ASIM_LOCUS11922	GO:0016020-IEA;GO:0016021-IEA	membrane-IEA;integral component of membrane-IEA	1	GO:0016020	membrane	-	-	-	-	-	-	-
MSTRG.74.1	SPRY domain protein	MITNRGLPLADDSSNSNDEDMGEEMSSSRGLSEDSWCSDGMKPATTFEEDERVARERLASLYPRVDLRRLPRTWNKNDKYHFLDISHSSLRVSYKGNGKQQQKDAASTRADYPIPPQCGVYYFEITIVRGLKGCMGVGVCGKSVNLNRLPGWDRYSYGYHGDDGNFFSFSGNGVSYGPKFTSGDVVGCGINLVNKTIFFTKNGVHLGIASRDLEHIDDLYPTVGLQTTGEVVDANFGQRPFRFDIRPEMETARAKVTNEILSIQLPPEKTDWMNRLVSSWMACEGYSKSMASFCNAAKLVPEEDEQSIEMRKEIVALVLSGRSKEAISRMEEAYPDIFVLNKNIALVLKCQQFVEMAAEIARQDSLANPVTASSSNGQALHSVVTPRSTLSHSTNPHKR…	655	20	0	0.7686	ANCCEY_02126;ANCCAN_01676;ANCCEY_02126;ANCCEY_02126;ANCCAN_01676;ANCCEY_02126;ANCCAN_01676;ANCCAN_01676;ANCCAN_01676;ANCCAN_01676;ANCCEY_02126;ANCCEY_02126	GO:0002943-IEA;GO:0017150-IEA;GO:0003824-IEA;GO:0050660-IEA;GO:0008033-IEA;GO:0055114-IEA	tRNA dihydrouridine synthesis-IEA;tRNA dihydrouridine synthase activity-IEA;catalytic activity-IEA;flavin adenine dinucleotide binding-IEA;tRNA processing-IEA;oxidation-reduction process-IEA	4	GO:0002943;GO:0017150;GO:0050660;GO:0055114	tRNA dihydrouridine synthesis;tRNA dihydrouridine synthase activity;flavin adenine dinucleotide binding;oxidation-reduction process	-	-	IPR024964;IPR003877;IPR043136;IPR001870;IPR006595;IPR035782;IPR013320	DOMAIN;DOMAIN;HOMOLOGOUS_SUPERFAMILY;HOMOLOGOUS_SUPERFAMILY;HOMOLOGOUS_SUPERFAMILY;HOMOLOGOUS_SUPERFAMILY;HOMOLOGOUS_SUPERFAMILY;HOMOLOGOUS_SUPERFAMILY;HOMOLOGOUS_SUPERFAMILY;DOMAIN;DOMAIN;DOMAIN;HOMOLOGOUS_SUPERFAMILY	CTLH/CRA C-terminal to LisH motif domain;SPRY domain;B30.2/SPRY domain superfamily;B30.2/SPRY domain superfamily;B30.2/SPRY domain superfamily;B30.2/SPRY domain superfamily;B30.2/SPRY domain superfamily;B30.2/SPRY domain superfamily;B30.2/SPRY domain superfamily;B30.2/SPRY domain;CTLH, C-terminal LisH motif;Ran binding protein 9/10, SPRY domain;Concanavalin A-like lectin/glucanase domain superfam…	PF10607 (PFAM);PF00622 (PFAM);G3DSA:2.60.120.920 (GENE3D);mobidb-lite (MOBIDB_LITE);mobidb-lite (MOBIDB_LITE);mobidb-lite (MOBIDB_LITE);mobidb-lite (MOBIDB_LITE);PTHR12864 (PANTHER);PTHR12864:SF56 (PANTHER);PS50188 (PROSITE_PROFILES);PS50897 (PROSITE_PROFILES);cd12909 (CDD);SSF49899 (SUPERFAMILY)	;protein binding;
MSTRG.74.2	SPRY domain protein	MITNRGLPLADDSSNSNDEDMGEEMSSSRGLSEDSWCSDGMKPATTFEEDERVARERLASLYPRVDLRRLPRTWNKNDKYHFLDISHSSLRVSYKGNGKQQQKDAASTRADYPIPPQCGVYYFEITIVRGLKGCMGVGVCGKSVNLNRLPGWDRYSYGYHGDDGNFFSFSGNGVSYGPKFTSGDVVGCGINLVNKTIFFTKNGVHLGIASRDLEHIDDLYPTVGLQTTGEVVDANFGQRPFRFDIRPEMETARAKVTNEILSIQLPPEKTDWMNRLVSSWMACEGYSKSMASFCNAAKLVPEEDEQSIEMRKEIVALVLSGRSKEAISRMEEAYPDIFVLNKNIALVLKCQQFVEMAAEIARQDSLANPVTASSSNGQALHSVVTPRSTLSHSTNPHKR…	652	20	0	0.7696	ANCCEY_02126;ANCCAN_01676;ANCCEY_02126;ANCCEY_02126;ANCCAN_01676;ANCCEY_02126;ANCCAN_01676;ANCCAN_01676;ANCCAN_01676;ANCCAN_01676;ANCCEY_02126;ANCCEY_02126	GO:0002943-IEA;GO:0017150-IEA;GO:0003824-IEA;GO:0050660-IEA;GO:0008033-IEA;GO:0055114-IEA	tRNA dihydrouridine synthesis-IEA;tRNA dihydrouridine synthase activity-IEA;catalytic activity-IEA;flavin adenine dinucleotide binding-IEA;tRNA processing-IEA;oxidation-reduction process-IEA	4	GO:0002943;GO:0017150;GO:0050660;GO:0055114	tRNA dihydrouridine synthesis;tRNA dihydrouridine synthase activity;flavin adenine dinucleotide binding;oxidation-reduction process	-	-	IPR024964;IPR003877;IPR043136;IPR001870;IPR006595;IPR035782;IPR013320	DOMAIN;DOMAIN;HOMOLOGOUS_SUPERFAMILY;HOMOLOGOUS_SUPERFAMILY;HOMOLOGOUS_SUPERFAMILY;HOMOLOGOUS_SUPERFAMILY;HOMOLOGOUS_SUPERFAMILY;HOMOLOGOUS_SUPERFAMILY;DOMAIN;DOMAIN;DOMAIN;HOMOLOGOUS_SUPERFAMILY	CTLH/CRA C-terminal to LisH motif domain;SPRY domain;B30.2/SPRY domain superfamily;B30.2/SPRY domain superfamily;B30.2/SPRY domain superfamily;B30.2/SPRY domain superfamily;B30.2/SPRY domain superfamily;B30.2/SPRY domain superfamily;B30.2/SPRY domain;CTLH, C-terminal LisH motif;Ran binding protein 9/10, SPRY domain;Concanavalin A-like lectin/glucanase domain superfamily	PF10607 (PFAM);PF00622 (PFAM);G3DSA:2.60.120.920 (GENE3D);mobidb-lite (MOBIDB_LITE);mobidb-lite (MOBIDB_LITE);mobidb-lite (MOBIDB_LITE);PTHR12864 (PANTHER);PTHR12864:SF56 (PANTHER);PS50188 (PROSITE_PROFILES);PS50897 (PROSITE_PROFILES);cd12909 (CDD);SSF49899 (SUPERFAMILY)	;protein binding;
MSTRG.75.1	SPRY domain protein	MGATSGSSLFANKVIMAPMVRAGRTPLSGADVAAIDVNMGCPKPFSIHCGMGAALLLQVDKVKEILTSLVGVSQVPVSCKIRVLDDLSATLNLVRVIENCGVAAIGVHGRRRDERDHHPCRIDEIREIARTVRIPVIANGGSADINCYDDVLKFRSDTGTSSVMIARKALSCPSVFRREGVLQFDEDVRNFLDLACECDENYTATKYVVQRMLGSNQDRDPRGRQTVLAGSVQEICRAWGCEEKYEKCRRDRIRKQNKRVFSNEISDYEYYDVTFPQKRLKDAKNASATPKCILFNYCKEVNAEKPVYSSHLREQDKRFEGSVEVLGKKFRSRKGQPNTRMAEQVAALAALIGLNLRHLLKGDWEEKP	368	20	0	0.8149	CAEBREN_15216;OESDEN_15507;GCK72_001509;NBR_LOCUS10759;PRIPAC_43294;L596_008580;HPBE_LOCUS4778;Acey_s0189.g1218;CRE_14205;FL82_19657;FL81_18078;ANCCEY_02126;FL81_18078;Acey_s0189.g1218;ANCDUO_09915;FL82_19657;CRE_14205;FL81_18078;ANCCAN_01676;GCK72_001509;GCK72_001509;ACOC_LOCUS88;Acey_s0189.g1218;ANCCAN_01676;Acey_s0189.g1218;ANCCAN_01676;HPLM_LOCUS15165;ACOC_LOCUS88;Acey_s0189.g1218;FL81_18078;…	GO:0003723-IEA;GO:0002943-IEA;GO:0017150-IEA;GO:0003824-IEA;GO:0050660-IEA;GO:0008033-IEA;GO:0016020-IEA;GO:0016021-IEA;GO:0055114-IEA	RNA binding-IEA;tRNA dihydrouridine synthesis-IEA;tRNA dihydrouridine synthase activity-IEA;catalytic activity-IEA;flavin adenine dinucleotide binding-IEA;tRNA processing-IEA;membrane-IEA;integral component of membrane-IEA;oxidation-reduction process-IEA	5	GO:0002943;GO:0016020;GO:0017150;GO:0050660;GO:0055114	tRNA dihydrouridine synthesis;membrane;tRNA dihydrouridine synthase activity;flavin adenine dinucleotide binding;oxidation-reduction process	-	-	IPR014720;IPR013785;IPR001269;IPR035587	DOMAIN;HOMOLOGOUS_SUPERFAMILY;HOMOLOGOUS_SUPERFAMILY;FAMILY;FAMILY;DOMAIN;DOMAIN;DOMAIN	Double-stranded RNA-binding domain;Aldolase-type TIM barrel;Aldolase-type TIM barrel;tRNA-dihydrouridine synthase;tRNA-dihydrouridine synthase;DUS-like, FMN-binding domain;DUS-like, FMN-binding domain;DUS-like, FMN-binding domain	PF00035 (PFAM);G3DSA:3.20.20.70 (GENE3D);G3DSA:3.30.160.20 (GENE3D);PF01207 (PFAM);PTHR45936 (PANTHER);cd02801 (CDD);SSF54768 (SUPERFAMILY);SSF51395 (SUPERFAMILY)	;catalytic activity;flavin adenine dinucleotide binding/oxidation-reduction process/tRNA processing/tRNA dihydrouridine synthase activity;
MSTRG.75.2	SPRY domain protein	MGATSGSSLFANKVIMAPMVRAGRTPLRLLALKYGADLCYTEEIIDQKLLSSTRVVNNILNTVDYALVDDIVLRIAPGEIGRCVLQIGTNSGTRATQVARMVGADVAAIDVNMGCPKPFSIHCGMGAALLLQVDKVKEILTSLVGVSQVPVSCKIRVLDDLSATLNLVRVIENCGVAAIGVHGRRRDERDHHPCRIDEIREIARTVRIPVIANGGSADINCYDDVLKFRSDTGTSSVMIARKALSCPSVFRREGVLQFDEDVRNFLDLACECDENYTATKYVVQRMLGSNQDRDPRGRQTVLAGSVQEICRAWGCEEKYEKCRRDRIRKQNKRVFSNEISDYEYYDVTFPQKRLKDAKNASATPKCILFNYCKEVNAEKPVYSSHLREQDKRFEGSVEV…	442	20	0	0.8124	CAEBREN_15216;GCK72_001509;NBR_LOCUS10759;PRIPAC_43294;HPBE_LOCUS4778;Acey_s0189.g1218;CRE_14205;FL82_19657;dus-2;FL81_18078;ANCCEY_02126;dus-2;Acey_s0189.g1218;FL81_18078;FL82_19657;CRE_14205;FL81_18078;ANCCAN_01676;GCK72_001509;ACOC_LOCUS88;GCK72_001509;Acey_s0189.g1218;ANCCAN_01676;Acey_s0189.g1218;ANCCAN_01676;HPLM_LOCUS15165;dus-2;Acey_s0189.g1218;ACOC_LOCUS88;HPLM_LOCUS15165;FL81_18078;dus-…	GO:0003723-IEA;GO:0005737-IBA;GO:0002943-IBA;GO:0002943-IEA;GO:0017150-IBA;GO:0017150-IEA;GO:0003824-IEA;GO:0050660-IEA;GO:0008033-IEA;GO:0016020-IEA;GO:0016021-IEA;GO:0055114-IEA	RNA binding-IEA;cytoplasm-IBA;tRNA dihydrouridine synthesis-IBA;tRNA dihydrouridine synthesis-IEA;tRNA dihydrouridine synthase activity-IBA;tRNA dihydrouridine synthase activity-IEA;catalytic activity-IEA;flavin adenine dinucleotide binding-IEA;tRNA processing-IEA;membrane-IEA;integral component of membrane-IEA;oxidation-reduction process-IEA	6	GO:0002943;GO:0005737;GO:0016021;GO:0017150;GO:0050660;GO:0055114	tRNA dihydrouridine synthesis;cytoplasm;integral component of membrane;tRNA dihydrouridine synthase activity;flavin adenine dinucleotide binding;oxidation-reduction process	-	-	IPR014720;IPR013785;IPR001269;IPR035587	DOMAIN;HOMOLOGOUS_SUPERFAMILY;HOMOLOGOUS_SUPERFAMILY;FAMILY;FAMILY;DOMAIN;DOMAIN;DOMAIN	Double-stranded RNA-binding domain;Aldolase-type TIM barrel;Aldolase-type TIM barrel;tRNA-dihydrouridine synthase;tRNA-dihydrouridine synthase;DUS-like, FMN-binding domain;DUS-like, FMN-binding domain;DUS-like, FMN-binding domain	PF00035 (PFAM);G3DSA:3.20.20.70 (GENE3D);G3DSA:3.30.160.20 (GENE3D);PF01207 (PFAM);PTHR45936 (PANTHER);cd02801 (CDD);SSF51395 (SUPERFAMILY);SSF54768 (SUPERFAMILY)	;catalytic activity;flavin adenine dinucleotide binding/oxidation-reduction process/tRNA processing/tRNA dihydrouridine synthase activity;
transcript_ACOC_0000008701-mRNA-1	SPRY domain protein	MGATSGSSLFANKVIMAPMVRAGRTPLRLLALKYGADLCYTEEIIDQKLLSSTRVVNNILNTVDYALVDDIVLRIAPGEIGRCVLQIGTNSGTRATQVARMVGADVAAIDVNMGCPKPFSIHCGMGAALLLQVDKVKEILTSLVGVSQVPVSCKIRVLDDLSATLNLVRVIENCGVAAIGVHGRRRDERDHHPCRIDEIREIARTVRIPVIANGGSADINCYDDVLKFRSDTGTSSVMIARKALSCPSVFRREGVLQFDEDVRNFLDLGLSCYDAFVFTSSYITVFQDRDPRGRQTVLAGSVQEICRAWGCEEKYEKCRRDRIRKQNKRVFSNEISDYEKRLKDAKNASATPKCILFNYCKEVNAEKPVYSSVNKRFEGSVEVLGKKFRSRKGQPNTRM…	426	20	0	0.772	CAEBREN_15216;GCK72_001509;NBR_LOCUS10759;HPBE_LOCUS4778;Acey_s0189.g1218;CRE_14205;FL82_19657;dus-2;FL81_18078;ANCCEY_02126;dus-2;Acey_s0189.g1218;FL81_18078;FL82_19657;CRE_14205;FL81_18078;ANCCAN_01676;GCK72_001509;GCK72_001509;ACOC_LOCUS88;Acey_s0189.g1218;ANCCAN_01676;Acey_s0189.g1218;ANCCAN_01676;HPLM_LOCUS15165;dus-2;Acey_s0189.g1218;ACOC_LOCUS88;FL81_18078;HPLM_LOCUS15165;dus-2;CRE_14205;A…	GO:0003723-IEA;GO:0005737-IBA;GO:0002943-IBA;GO:0002943-IEA;GO:0017150-IBA;GO:0017150-IEA;GO:0003824-IEA;GO:0050660-IEA;GO:0008033-IEA;GO:0016020-IEA;GO:0016021-IEA;GO:0055114-IEA	RNA binding-IEA;cytoplasm-IBA;tRNA dihydrouridine synthesis-IBA;tRNA dihydrouridine synthesis-IEA;tRNA dihydrouridine synthase activity-IBA;tRNA dihydrouridine synthase activity-IEA;catalytic activity-IEA;flavin adenine dinucleotide binding-IEA;tRNA processing-IEA;membrane-IEA;integral component of membrane-IEA;oxidation-reduction process-IEA	6	GO:0002943;GO:0005737;GO:0016020;GO:0017150;GO:0050660;GO:0055114	tRNA dihydrouridine synthesis;cytoplasm;membrane;tRNA dihydrouridine synthase activity;flavin adenine dinucleotide binding;oxidation-reduction process	-	-	IPR013785;IPR001269;IPR035587	DOMAIN;HOMOLOGOUS_SUPERFAMILY;FAMILY;FAMILY;DOMAIN;DOMAIN;DOMAIN	Zmiz1, N-terminal tetratricopeptide repeat domain;Aldolase-type TIM barrel;tRNA-dihydrouridine synthase;tRNA-dihydrouridine synthase;DUS-like, FMN-binding domain;DUS-like, FMN-binding domain;DUS-like, FMN-binding domain	G3DSA:3.30.160.20 (GENE3D);G3DSA:3.20.20.70 (GENE3D);PF01207 (PFAM);PTHR45936 (PANTHER);cd02801 (CDD);SSF51395 (SUPERFAMILY);SSF54768 (SUPERFAMILY)	;catalytic activity;flavin adenine dinucleotide binding/oxidation-reduction process/tRNA processing/tRNA dihydrouridine synthase activity;
transcript_ACOC_0000008801-mRNA-1	peptidyl-prolyl cis-trans isomerase, cyclophilin-type	MNQFISFVLCLLVVPAIYATSEPKGPKVTDKVWFDIEQNGQPMGRIVIGLFGKTVPRTTENFIGLAKKPKGEGYLGSKFHRVIPEFMIQGGDFTHGDGTGGKSIYGEKFADENFKVKHYGAGWVSMANAGKDTNGSQFFITVKKTSWLDGRHVVFGKVLSGMDVVRAIETVPKVGDKPKDDIIIAACGHEVVEMPFAVEKSDATA	205	20	4.9e-149	0.87	Cbn-cyn-5;HPBE_LOCUS4776;DICVIV_09716;cyn-5;Cnig_chr_I.g3813;NBR_LOCUS10762;cyn-5;cyn-5;TELCIR_15771;Acey_s0305.g1960;Cre-cyn-5;NBR_LOCUS10762;Acey_s0305.g1960;TELCIR_15771;Acey_s0305.g1960;NECAME_15322;HPLM_LOCUS393;Acey_s0305.g1960;Acey_s0305.g1960;HPLM_LOCUS15164;FL83_09144;Acey_s0305.g1960;cyn-5;HPBE_LOCUS4776;Cbn-cyn-5;Cre-cyn-5;L596_010285;HPLM_LOCUS15164;ACOC_LOCUS89;cyn-5;NECAME_15322;FL8…	GO:0003755-IBA;GO:0003755-IEA;GO:0005737-IBA;GO:0005737-IEA;GO:0043231-IBA;GO:0000413-IBA;GO:0000413-IEA;GO:0016853-IEA;GO:0016018-IBA;GO:0006457-IBA;GO:0006457-IEA	peptidyl-prolyl cis-trans isomerase activity-IBA;peptidyl-prolyl cis-trans isomerase activity-IEA;cytoplasm-IBA;cytoplasm-IEA;intracellular membrane-bounded organelle-IBA;protein peptidyl-prolyl isomerization-IBA;protein peptidyl-prolyl isomerization-IEA;isomerase activity-IEA;cyclosporin A binding-IBA;protein folding-IBA;protein folding-IEA	6	GO:0000413;GO:0003755;GO:0005737;GO:0006457;GO:0016018;GO:0043231	protein peptidyl-prolyl isomerization;peptidyl-prolyl cis-trans isomerase activity;cytoplasm;protein folding;cyclosporin A binding;intracellular membrane-bounded organelle	EC:5.2.1.8	Peptidylprolyl isomerase	IPR002130;IPR002130;IPR029000;IPR002130;IPR029000	DOMAIN;DOMAIN;HOMOLOGOUS_SUPERFAMILY;HOMOLOGOUS_SUPERFAMILY;HOMOLOGOUS_SUPERFAMILY;DOMAIN;HOMOLOGOUS_SUPERFAMILY	Cyclophilin-type peptidyl-prolyl cis-trans isomerase domain;Cyclophilin-type peptidyl-prolyl cis-trans isomerase domain;Cyclophilin-like domain superfamily;Cyclophilin-like domain superfamily;Cyclophilin-like domain superfamily;Cyclophilin-type peptidyl-prolyl cis-trans isomerase domain;Cyclophilin-like domain superfamily	PR00153 (PRINTS);PF00160 (PFAM);G3DSA:2.40.100.10 (GENE3D);PTHR11071:SF293 (PANTHER);PTHR11071 (PANTHER);PS50072 (PROSITE_PROFILES);SSF50891 (SUPERFAMILY)	peptidyl-prolyl cis-trans isomerase activity/protein peptidyl-prolyl isomerization;peptidyl-prolyl cis-trans isomerase activity/protein peptidyl-prolyl isomerization;peptidyl-prolyl cis-trans isomerase activity/protein peptidyl-prolyl isomerization;
transcript_ACOC_0000008901-mRNA-1	cyclin ccl1	MYSTSTQKKEWTFTKDELAEKRRLANEAFRYKQADLLQPGEEEILLTVEEEAQMLNVVECAAIRIALQIVMMACFYLAMKVEEFYVTIDEFVANLRSGTPEQNTTRILGLEPEIMRALRYHITIHCPFRPFEGHLVEMKTRMLLLNFNVETIREPADQFFRKALLSDIMLMYPPSQIALAALKYGLDSLDKSPDVLTEFLQKLMGIEDDWKGTHGDALQIIDKLLIRQVLVGCYP	235	20	8.5e-175	0.8387	ACOC_LOCUS90;ANCCAN_01669;OESDEN_19572;Cre-cyh-1;Cre-cyh-1;HPBE_LOCUS4775;Cre-cyh-1;OESDEN_19572;OESDEN_19572;ACOC_LOCUS90;TELCIR_15772;NECAME_15323;HPBE_LOCUS4775;Acey_s0305.g1963;ANCDUO_22478;TELCIR_15772;DICVIV_09717;TELCIR_24780;TELCIR_15772;HPBE_LOCUS4775;DICVIV_09717;Cre-cyh-1;WR25_14288;TELCIR_15957;ANCCAN_01669;OESDEN_19572;CGOC_LOCUS2148;NECAME_15323;TELCIR_15957;ANCDUO_22478;HPLM_LOCUS6…	GO:0000079-IEA;GO:0016538-IEA;GO:0016020-IEA;GO:0016021-IEA;GO:0042025-IEA;GO:0006357-IEA	regulation of cyclin-dependent protein serine/threonine kinase activity-IEA;cyclin-dependent protein serine/threonine kinase regulator activity-IEA;membrane-IEA;integral component of membrane-IEA;host cell nucleus-IEA;regulation of transcription by RNA polymerase II-IEA	5	GO:0000079;GO:0006357;GO:0016021;GO:0016538;GO:0042025	regulation of cyclin-dependent protein serine/threonine kinase activity;regulation of transcription by RNA polymerase II;integral component of membrane;cyclin-dependent protein serine/threonine kinase regulator activity;host cell nucleus	-	-	IPR031658;IPR006671;IPR043198;IPR013763;IPR036915;IPR036915	DOMAIN;DOMAIN;DOMAIN;DOMAIN;DOMAIN;FAMILY;DOMAIN;HOMOLOGOUS_SUPERFAMILY;HOMOLOGOUS_SUPERFAMILY	Cyclin, C-terminal domain 2;Cyclin, C-terminal domain 2;Cyclin, C-terminal domain 2;Cyclin, N-terminal;Cyclin, N-terminal;Cyclin/Cyclin-like subunit Ssn8;Cyclin-like;Cyclin-like superfamily;Cyclin-like superfamily	PF16899 (PFAM);G3DSA:1.10.472.10 (GENE3D);G3DSA:1.10.472.10 (GENE3D);PF00134 (PFAM);PTHR10026:SF8 (PANTHER);PTHR10026 (PANTHER);cd00043 (CDD);SSF47954 (SUPERFAMILY);SSF47954 (SUPERFAMILY)	;host cell nucleus/cyclin-dependent protein serine/threonine kinase regulator activity/regulation of transcription by RNA polymerase II;
MSTRG.77.1	cyclin ccl1	MYSTSTQKKEWTFTKDELAEKRRLANEAFRYKQADLLQPGEEEILLTVEEEAQMLNVVECAAIRFSDTFQPSMWPSVRWTAYAYFKRLFLGWSVMEASPKIVMMACFYLAMKVEEFYVTIDEFVANLRSGTPEQNTTRILGLEPEIMRALRYHITIHCPFRPFEGHLVEMKTRMLLLNFNVETIREPADQFFRKALLSDIMLMYPPSQIALAALKYGLDSLDKSPDVLTEFLQKLMGIEDDWKGTHGDALQIIDKLLIRLNDIVDIVNSSGKPLTQEEHTAIQARTEDWATLSLALEERRQSKPGYTKKEEPVDSDDE	318	20	0	0.8661	ACOC_LOCUS90;ANCCAN_01669;CAEBREN_02046;HPBE_LOCUS4775;CAEBREN_02046;ACOC_LOCUS90;DME_LOCUS2968;TELCIR_15772;NECAME_15323;HPBE_LOCUS4775;Acey_s0305.g1963;ANCDUO_22478;TELCIR_15772;DICVIV_09717;DME_LOCUS2968;DME_LOCUS2968;TELCIR_15772;HPBE_LOCUS4775;DICVIV_09717;WR25_14288;TELCIR_15957;ANCCAN_01669;CGOC_LOCUS2148;NECAME_15323;DME_LOCUS2968;TELCIR_15957;ANCDUO_22478;HPLM_LOCUS6889;SVUK_LOCUS1336;PR…	GO:0000079-IEA;GO:0016538-IEA;GO:0042025-IEA;GO:0006357-IEA	regulation of cyclin-dependent protein serine/threonine kinase activity-IEA;cyclin-dependent protein serine/threonine kinase regulator activity-IEA;host cell nucleus-IEA;regulation of transcription by RNA polymerase II-IEA	4	GO:0000079;GO:0006357;GO:0016538;GO:0042025	regulation of cyclin-dependent protein serine/threonine kinase activity;regulation of transcription by RNA polymerase II;cyclin-dependent protein serine/threonine kinase regulator activity;host cell nucleus	-	-	IPR031658;IPR006671;IPR043198;IPR013763;IPR036915;IPR036915	HOMOLOGOUS_SUPERFAMILY;DOMAIN;DOMAIN;DOMAIN;DOMAIN;FAMILY;FAMILY;DOMAIN;HOMOLOGOUS_SUPERFAMILY;HOMOLOGOUS_SUPERFAMILY	Papain-like cysteine peptidase superfamily;Cyclin, C-terminal domain 2;Cyclin, N-terminal;Cyclin, N-terminal;Cyclin, N-terminal;Cyclin/Cyclin-like subunit Ssn8;Cyclin/Cyclin-like subunit Ssn8;Cyclin-like;Cyclin-like superfamily;Cyclin-like superfamily	G3DSA:1.10.472.10 (GENE3D);PF16899 (PFAM);PF00134 (PFAM);G3DSA:1.10.472.10 (GENE3D);mobidb-lite (MOBIDB_LITE);PTHR10026 (PANTHER);PTHR10026:SF8 (PANTHER);cd00043 (CDD);SSF47954 (SUPERFAMILY);SSF47954 (SUPERFAMILY)	;host cell nucleus/cyclin-dependent protein serine/threonine kinase regulator activity/regulation of transcription by RNA polymerase II;
MSTRG.79.1	metal cation transporter, ZIP family	MAVLKPSRAGNWELRKNRRRYSLDGLEHSTKDMRKPIDEIECRIVQVFALKMRHGLRWLDVLFPLPNAEFSTLRASSHSAQDSLRALLLLTLFAITFASTMLATVLRGEYARNHLSSFIACFGGGVFLATCLLDLLPDAIESFEKTNFDTSFPVAESAVIGGLLIVLFMEQIVLTMRERGCLVSGHTHLHSERDDQEIQGSPTSMVSGEERNSAVGALLLVLVLSLHALFEGLSIAVVNDASKLVEVFVALTLHKCVIGFSLGVRLVQSGLRTSWVALSSCIFSVQILIGGFGGLELMALLSGGDRATAALVSSILQGIACGTFLYITTFEVVPHELDRMGILFSTLFVFSVGFYWFLSSQ	361	20	1e-155	0.7651	Acey_s0305.g1966;NBR_LOCUS8554;zipt-1;GCK72_001466;Cni-F31C3.4;GCK72_001466;zipt-1;ACOC_LOCUS92;zipt-1;HPLM_LOCUS6886;zipt-1;DICVIV_09719;FL81_18042;Cni-F31C3.4;zipt-1;FL83_09146;Acey_s0305.g1966;HPBE_LOCUS4773;zipt-1;zipt-1;DICVIV_09719;FL81_18042;zipt-1;ANCCAN_01666;HPLM_LOCUS6886;zipt-1;CRE_20683;zipt-1;zipt-1;CRE_20683;Cni-F31C3.4;HPBE_LOCUS4773;zipt-1;NBR_LOCUS8554;Acey_s0305.g1966;FL83_0914…	GO:0055085-IEA;GO:0046873-IEA;GO:0016020-IBA;GO:0016020-IEA;GO:0016021-IEA;GO:0030001-IEA;GO:0005385-IBA;GO:0071577-IBA;GO:0005886-IBA	transmembrane transport-IEA;metal ion transmembrane transporter activity-IEA;membrane-IBA;membrane-IEA;integral component of membrane-IEA;metal ion transport-IEA;zinc ion transmembrane transporter activity-IBA;zinc ion transmembrane transport-IBA;plasma membrane-IBA	4	GO:0005385;GO:0005886;GO:0016021;GO:0071577	zinc ion transmembrane transporter activity;plasma membrane;integral component of membrane;zinc ion transmembrane transport	-	-	IPR003689	FAMILY;FAMILY;FAMILY	Zinc/iron permease;Zinc/iron permease;Zinc/iron permease	PF02535 (PFAM);PTHR11040 (PANTHER);PTHR11040:SF137 (PANTHER)	metal ion transport/membrane/metal ion transmembrane transporter activity/transmembrane transport;
MSTRG.80.1	primase zinc finger	MDPHGAFNSITSHPPPRRPANAVFHNDYRAKLGNRQTQVPSTTSNLTGTIHPIGNNVVKQLEMKTITKAEERTKLKEIIGGRSHLLGARNMTSLTNPKKIGGKVQSVVRDGSMLEFIKKQPTALKRYPYVPKLGTGLRGDKSVNLVAKAPDGSSTSSQDPARIRAIAILKRRQEATGSASKPLKRKSENKADQESPKRSKLSSIGNLPNLDILLRKKSIHDSESNKAQGIAMQKHLDSLEQTEKVETFASECMAVKNVRIVSCKKCGYTAQKRSELCMREGHYITKGTAEKRFFKCSSCQRRTVAYGIMPTKACKHCHENEWVRVAMKDERKVQLENEKLLVRDIYKFCRCLQRWRENSESCTFIPPARIVETKTCFACAKHLCLSDTVLKRDIASRWF…	402	20	0	0.6872	Acey_s0305.g1967;mcm-10;Acey_s0305.g1967;ANCCAN_01665;Cni-mcm-10;ANCCAN_01665;Acey_s0305.g1967;Acey_s0305.g1967;TELCIR_11666;Acey_s0305.g1967;mcm-10;ANCCAN_01665;FL83_17657;ACOC_LOCUS93;Acey_s0305.g1967;mcm-10;ANCCAN_01665;mcm-10;Acey_s0305.g1967;mcm-10;mcm-10;FL81_14923;ANCDUO_24547;Acey_s0305.g1967;mcm-10;FL81_14923;DICVIV_09720;mcm-10;NECAME_15980;FL83_17657;NECAME_15980;FL81_14923;FL81_14923;…	GO:0006270-IBA;GO:0006270-IEA;GO:0003688-IBA;GO:0006260-IEA;GO:0003690-IBA;GO:0003690-IEA;GO:0031298-IBA;GO:0005634-IEA;GO:0003697-IBA;GO:0003697-IEA	DNA replication initiation-IBA;DNA replication initiation-IEA;DNA replication origin binding-IBA;DNA replication-IEA;double-stranded DNA binding-IBA;double-stranded DNA binding-IEA;replication fork protection complex-IBA;nucleus-IEA;single-stranded DNA binding-IBA;single-stranded DNA binding-IEA	4	GO:0003690;GO:0003697;GO:0005634;GO:0006270	double-stranded DNA binding;single-stranded DNA binding;nucleus;DNA replication initiation	-	-	IPR015411;IPR040184	DOMAIN;DOMAIN;DOMAIN;DOMAIN;FAMILY	Replication factor Mcm10, C-terminal;Replication factor Mcm10, C-terminal;Replication factor Mcm10, C-terminal;Replication factor Mcm10, C-terminal;Minichromosome maintenance protein 10	PF09332 (PFAM);mobidb-lite (MOBIDB_LITE);mobidb-lite (MOBIDB_LITE);mobidb-lite (MOBIDB_LITE);PTHR13454 (PANTHER)	;double-stranded DNA binding/DNA replication initiation/single-stranded DNA binding
transcript_ACOC_0000009201-mRNA-1	primase zinc finger	MPNFRAKLGNRQTQVPSTTSNLTGTIHPIGNNVVKQLEMKTITKAEERTKLKEIIGGRSHLLGARNMTSLTNPKKIGGKVQSVVRDGSMLEFIKKQPTALKRYPYVPKLGTGLRGDKSVNLVAKAPDGSSTSSQDPARIRAIAILKRRQEATGSASKPLKRKSENKADQESPKRSKLSSIGNLPNLDILLRKKSIHDSESNKAQGIAMQKHLDSLEQTEKVETFASECMAVKNVRIVSCKKCGYTAQKRSELCMREGHYITKGTAEKRFFKCSSCQRRTVAYGIMPTKACKTVGRLV	297	20	0	0.6753	Acey_s0305.g1967;mcm-10;Acey_s0305.g1967;ANCCAN_01665;Cni-mcm-10;ANCCAN_01665;Acey_s0305.g1967;Acey_s0305.g1967;TELCIR_11666;Acey_s0305.g1967;mcm-10;ANCCAN_01665;FL83_17657;ACOC_LOCUS93;Acey_s0305.g1967;mcm-10;ANCCAN_01665;mcm-10;Acey_s0305.g1967;mcm-10;mcm-10;FL81_14923;ANCDUO_24547;Acey_s0305.g1967;mcm-10;FL81_14923;DICVIV_09720;mcm-10;NECAME_15980;FL83_17657;NECAME_15980;FL81_14923;FL81_14923;…	GO:0006270-IBA;GO:0006270-IEA;GO:0003688-IBA;GO:0006260-IEA;GO:0003690-IBA;GO:0003690-IEA;GO:0031298-IBA;GO:0005634-IEA;GO:0003697-IBA;GO:0003697-IEA	DNA replication initiation-IBA;DNA replication initiation-IEA;DNA replication origin binding-IBA;DNA replication-IEA;double-stranded DNA binding-IBA;double-stranded DNA binding-IEA;replication fork protection complex-IBA;nucleus-IEA;single-stranded DNA binding-IBA;single-stranded DNA binding-IEA	4	GO:0003690;GO:0003697;GO:0005634;GO:0006270	double-stranded DNA binding;single-stranded DNA binding;nucleus;DNA replication initiation	-	-	IPR015411;IPR040184	DOMAIN;DOMAIN;DOMAIN;DOMAIN;FAMILY	Replication factor Mcm10, C-terminal;Replication factor Mcm10, C-terminal;Replication factor Mcm10, C-terminal;Replication factor Mcm10, C-terminal;Minichromosome maintenance protein 10	PF09332 (PFAM);mobidb-lite (MOBIDB_LITE);mobidb-lite (MOBIDB_LITE);mobidb-lite (MOBIDB_LITE);PTHR13454 (PANTHER)	;double-stranded DNA binding/DNA replication initiation/single-stranded DNA binding
MSTRG.82.1	unnamed protein product	MAPSDMLWRNNCGRLTRIHPALTKVTIMLVQRSLLSQHVALERTGKCVELRDRGYRSLSLVDFTDVMDEDNDDVIEATEALETACCLNRAPEIPPGLESTSSSSGQPNTPSFHPADVERVIQRYGQLIEKFQFNQAREAIEQYMQSTSKPVVITNEKDVSWSALLSSLALIANCDKNYYLLSFLQPKAFFRKENALKNQYYQISENLMRASPSASVPDSSATNLALADYLIVQCRQYVLARVKMINIYTTLASLANDREILWESIHARGVRITEMLQSSQKHSLFSMVHLLSGEIAVLLLLVSAQIHISNCKMFESLLQLKEIRERFDFWVRDSHCLNSVNKSVFYFFRSTEKLPRNRLINWFVQFYNLLMAKFSLYFTNVLANFCSVDDLKNIYTIDN…	566	20	0	0.8641	ANCCEY_00216;ANCCEY_00216	GO:0016020-IEA;GO:0016021-IEA	membrane-IEA;integral component of membrane-IEA	1	GO:0016021	integral component of membrane	-	-	IPR018544;IPR038060;IPR018544;IPR038060	FAMILY;FAMILY;HOMOLOGOUS_SUPERFAMILY;HOMOLOGOUS_SUPERFAMILY;HOMOLOGOUS_SUPERFAMILY;FAMILY;HOMOLOGOUS_SUPERFAMILY;HOMOLOGOUS_SUPERFAMILY	Bardet-Biedl syndrome 1 protein;KICSTOR complex protein C12orf66-like;KICSTOR complex protein C12orf66-like, central domain superfamily;KICSTOR complex protein C12orf66-like, central domain superfamily;KICSTOR complex protein C12orf66-like, central domain superfamily;KICSTOR complex protein C12orf66-like;KICSTOR complex protein C12orf66-like, central domain superfamily;KICSTOR complex protein C12…	G3DSA:3.30.450.240 (GENE3D);PF09404 (PFAM);G3DSA:1.10.3450.30 (GENE3D);mobidb-lite (MOBIDB_LITE);mobidb-lite (MOBIDB_LITE);PTHR31581 (PANTHER);SSF158548 (SUPERFAMILY);SSF160651 (SUPERFAMILY)	;
transcript_ACOC_0000009401-mRNA-1	unnamed protein product	MDEDNDDVIEATEALETACCLNRAPEIPPGLESTSSSSGQPNTPSFHPADVERVIQRYGQLIEKFQFNQAREAIEQYMQSTSKPVVITNEKDVSWSALLSSLALIANCDKNYYLLSFLQPKAFFRKENALKNQYYQISENLMRASPSASVPDSSATNLALADYLIVQCRQYVLARVKMINIYTTLASLANDREILWESIHARGVRITEMLQSSQKHSLFSMVHLLSGEIAVLLLLVSAQIHISNCKMFESLLQLKEIRERFDFWVRDSHCLNSVNKSVFYFFRSTEKLPRNRLINWFVQFYNLLMAKFSLYFTNVLANFCSVDDLKNIYTIDNGYNFISNATQLVKKTDAVCLAIVMDRENFTENFYGFGYHRLKDRFTPGAPTEPRKGLAALCPAVFR…	500	20	0	0.8652	ANCCEY_00216;ANCCEY_00216	GO:0016020-IEA;GO:0016021-IEA	membrane-IEA;integral component of membrane-IEA	1	GO:0016021	integral component of membrane	-	-	IPR018544;IPR038060;IPR018544;IPR038060	HOMOLOGOUS_SUPERFAMILY;FAMILY;HOMOLOGOUS_SUPERFAMILY;HOMOLOGOUS_SUPERFAMILY;HOMOLOGOUS_SUPERFAMILY;FAMILY;HOMOLOGOUS_SUPERFAMILY;HOMOLOGOUS_SUPERFAMILY	LEM/LEM-like domain superfamily;KICSTOR complex protein C12orf66-like;KICSTOR complex protein C12orf66-like, central domain superfamily;KICSTOR complex protein C12orf66-like, central domain superfamily;KICSTOR complex protein C12orf66-like, central domain superfamily;KICSTOR complex protein C12orf66-like;KICSTOR complex protein C12orf66-like, central domain superfamily;KICSTOR complex protein C12…	G3DSA:3.30.450.240 (GENE3D);PF09404 (PFAM);G3DSA:1.10.3450.30 (GENE3D);mobidb-lite (MOBIDB_LITE);mobidb-lite (MOBIDB_LITE);PTHR31581 (PANTHER);SSF158548 (SUPERFAMILY);SSF160651 (SUPERFAMILY)	;
MSTRG.83.1	Protein F02E9.1	MLTNFLNGIRNEGTCSKISMVFYDKYKYLLVIGPVQIDMIARDKVRLTSDGHHHYFLLSVTDKGHITWFCHAIKWTVCPSLLPHLMVFDMEELNSLSFERLEYVADYCNLAKQLEDRLILARSEITKARTVRELSFTSLYNVNVQSLEPTARVLYKEGKFRLFDESQMKDEEEGSSTIRSRKAESFDANSEQEKPKPEIPRFRPFGILEPSSAKEARKTMQSALQIICELATLQYEIKRIDSKLLTIKKTLTEDRELSQKLYEVLQV	267	20	2.4e-123	0.6439	NBR_LOCUS8229;FL82_12380;impad1;EVEC_LOCUS11900;impad1;FL83_22801;TCNE_LOCUS15370;ACOC_LOCUS96;TCNE_LOCUS15370;HPLM_LOCUS11977;impad1;DICVIV_00972;impad1;WR25_00496;TCNE_LOCUS15370;TELCIR_07402;TCNE_LOCUS15370;NECAME_05597	GO:0016020-IEA;GO:0016021-IEA;GO:0046854-IEA;GO:0046855-IEA;GO:0070072-IEA	membrane-IEA;integral component of membrane-IEA;phosphatidylinositol phosphorylation-IEA;inositol phosphate dephosphorylation-IEA;vacuolar proton-transporting V-type ATPase complex assembly-IEA	1	GO:0070072	vacuolar proton-transporting V-type ATPase complex assembly	-	-	IPR040357	DOMAIN;DOMAIN;FAMILY	DUS-like, FMN-binding domain;DUS-like, FMN-binding domain;Vma22/CCDC115	mobidb-lite (MOBIDB_LITE);mobidb-lite (MOBIDB_LITE);PTHR31996 (PANTHER)	;vacuolar proton-transporting V-type ATPase complex assembly
transcript_ACOC_0000009601-mRNA-1	ribosomal protein L19	MDGYPLIDIRRPPDIAEPDTIHESLRIFRLIAVRVLGTILRLPGLILLELWWRNHFSLINVTLKAPFNSCLDISTILAFVHTRNFDNSAAIILSYSVLFLSIMFLTLPLSKLFKVYTHALSLMIFAFAHYMSTTYVNLEQNSNDVELKLDTFVKLERHGFHFLAQLMLSVVQSCVLGLESDLGRALLTVFTLPIVARMSGFPLEKLIIAHNIACSLVMLFICIYVLNRVPDMVHGMRIAFRQVKAIFVVRGLAGGFVTIWRRLRIAELMTCAWLTMFTIRLYVEIWEKGCTWREAGPALLASIAESTNTPISLLSLALTVSFVCKWVVDGTQLVIGGRRDHGHVLAHSGYTEALTLVLLCLQTGLLGMKTEKKAFLLGLVLFIVMSALLQSLYELLEPQ…	638	20	0	0.7768	rnf-145;FL81_14479;FL83_14695;Acey_s0333.g2809;HPLM_LOCUS11978;NECAME_05596;ANCCEY_12594;DICVIV_00973;Acey_s0333.g2809;FL81_14479;HPLM_LOCUS11978;NECAME_05596;ANCCEY_12594;Acey_s0333.g2809;HPLM_LOCUS11978;HPLM_LOCUS11978;ANCCEY_12594;ACOC_LOCUS97;DICVIV_00973;L596_007092;FL83_14695;FL82_16261;CAEBREN_12920;rnf-145;rnf-145;ACOC_LOCUS97;HPLM_LOCUS11978;Acey_s0333.g2809;FL82_16261;Acey_s0333.g2809;r…	GO:0061630-IBA;GO:0008270-IEA;GO:0003735-IEA;GO:0046872-IEA;GO:0016020-IEA;GO:0016021-IEA;GO:0012505-IBA;GO:0005783-IBA;GO:0005840-IEA;GO:0006412-IEA;GO:0016567-IEA	ubiquitin protein ligase activity-IBA;zinc ion binding-IEA;structural constituent of ribosome-IEA;metal ion binding-IEA;membrane-IEA;integral component of membrane-IEA;endomembrane system-IBA;endoplasmic reticulum-IBA;ribosome-IEA;translation-IEA;protein ubiquitination-IEA	6	GO:0003735;GO:0005840;GO:0006412;GO:0008270;GO:0012505;GO:0016021	structural constituent of ribosome;ribosome;translation;zinc ion binding;endomembrane system;integral component of membrane	-	-	IPR025754;IPR001841;IPR013083;IPR001841	DOMAIN;DOMAIN;HOMOLOGOUS_SUPERFAMILY;HOMOLOGOUS_SUPERFAMILY;HOMOLOGOUS_SUPERFAMILY;DOMAIN;DOMAIN	TRC8 N-terminal domain;Zinc finger, RING-type;Zinc finger, RING/FYVE/PHD-type;Zinc finger, RING/FYVE/PHD-type;Zinc finger, RING/FYVE/PHD-type;Zinc finger, RING-type;Zinc finger, RING-type	PF13705 (PFAM);PF13639 (PFAM);G3DSA:3.30.40.10 (GENE3D);PTHR22763 (PANTHER);PTHR22763:SF168 (PANTHER);PS50089 (PROSITE_PROFILES);SSF57850 (SUPERFAMILY)	;
MSTRG.84.1	ribosomal protein L19	MDGYPLIDIRRPPDIAEPDTIHESLRIFRLIAVRVLGTILRLPGLILLELWWRNRDINIEEVAQEMLTKAPFNSCLDISTILAFVHTRNFDNSAAIILSYSVLFLSIMFLTLPLSKLFKVYTHALSLMIFAFAHYMSTTYVNLEQNSNDVELKLDTFVKLERHGFHFLAQLMLSVVQSCVLGLESDLGRALLTVFTLPIVARMSGFPLEKLIIAHNIACSLVMLFICIYVLNRVPDMVHGMRIAFRQVKAIFVVRGLAGGFVTIWRRLRIAELMTCAWLTMFTIRLYVEIWEKGCTWREAGPALLASIAESTNTPISLLSLALTVSFVCKWVVDGTQLVIGGRRDHGHVLAHSGYTEALTLVLLCLQTGLLGMKTEKKAFLLGLVLFIVMSALLQSLYE…	696	20	0	0.8065	rnf-145;FL81_14479;FL83_14695;Acey_s0333.g2809;X798_00404;HPLM_LOCUS11978;NECAME_05596;ANCCEY_12594;DICVIV_00973;Acey_s0333.g2809;FL81_14479;HPLM_LOCUS11978;NECAME_05596;ANCCEY_12594;HPLM_LOCUS11978;Acey_s0333.g2809;HPLM_LOCUS11978;X798_00404;ACOC_LOCUS97;ANCCEY_12594;DICVIV_00973;L596_007092;FL83_14695;FL82_16261;X798_00404;rnf-145;rnf-145;ACOC_LOCUS97;HPLM_LOCUS11978;FL82_16261;Acey_s0333.g2809…	GO:0061630-IBA;GO:0008270-IEA;GO:0003735-IEA;GO:0046872-IEA;GO:0016020-IEA;GO:0016021-IEA;GO:0012505-IBA;GO:0005783-IBA;GO:0005840-IEA;GO:0006412-IEA;GO:0016567-IEA	ubiquitin protein ligase activity-IBA;zinc ion binding-IEA;structural constituent of ribosome-IEA;metal ion binding-IEA;membrane-IEA;integral component of membrane-IEA;endomembrane system-IBA;endoplasmic reticulum-IBA;ribosome-IEA;translation-IEA;protein ubiquitination-IEA	6	GO:0003735;GO:0005840;GO:0006412;GO:0008270;GO:0012505;GO:0016021	structural constituent of ribosome;ribosome;translation;zinc ion binding;endomembrane system;integral component of membrane	-	-	IPR001841;IPR013083;IPR025754;IPR001841	DOMAIN;HOMOLOGOUS_SUPERFAMILY;DOMAIN;DOMAIN;DOMAIN;DOMAIN;DOMAIN;DOMAIN;DOMAIN	Zinc finger, RING-type;Zinc finger, RING/FYVE/PHD-type;TRC8 N-terminal domain;TRC8 N-terminal domain;TRC8 N-terminal domain;TRC8 N-terminal domain;Zinc finger, RING-type;Zinc finger, RING-type;Zinc finger, RING-type	PF13639 (PFAM);G3DSA:3.30.40.10 (GENE3D);PF13705 (PFAM);mobidb-lite (MOBIDB_LITE);PTHR22763 (PANTHER);PTHR22763:SF168 (PANTHER);PS50089 (PROSITE_PROFILES);cd16476 (CDD);SSF57850 (SUPERFAMILY)	;
MSTRG.85.1	ribosomal protein L19	MTSFSVSPMMRLVQAVAVQRFSCRNSAEMCPSRPSRASRKLSGLKKRMEELKHIPDFPLIYPDFLQSPVWNRRNKLKEELEHQDMLERRMNIDIPEFYVGSILAVTTSEKYLGSKEHRFVGICIRREKEGLHHQFTLRNVIEGIGVEVMYDLYNPTIRKIETLKLEKRLDRDLSYLADALPEYSTFDFHMEPTSHPAGAPVPINPIKVKLQPPPWSRRWELYDYKGIDGAWAGATPYFKRKFHKTKMNDYLRYDLIADYRVSSDLEHELNVEEKMQKFEKERHEAGLTRRRIFRSAAALNRPSSQILDVSIDS	313	20	0	0.8481	CAEBREN_30208;mrpl-19;ANCCAN_14162;FL83_14696;WR25_15280;Acey_s0333.g2811;HPLM_LOCUS11978;ANCCEY_12594;DICVIV_00973;HPLM_LOCUS11978;ACOC_LOCUS98;ANCCEY_12594;HPLM_LOCUS11978;mrpl-19;CAEBREN_30936;TELCIR_15609;NBR_LOCUS8232;HPLM_LOCUS11978;mrpl-19;ANCCEY_12594;DICVIV_00973;Cni-mrpl-19;CRE_03651;ANCCAN_14162;mrpl-19;mrpl-19;HPLM_LOCUS11978;CAEBREN_30208;mrpl-19;Cni-mrpl-19;NECAME_05595;DICVIV_00973…	GO:0003735-IBA;GO:0003735-IEA;GO:0008270-IEA;GO:0046872-IEA;GO:0005739-IEA;GO:0016020-IEA;GO:0016021-IEA;GO:0005762-IBA;GO:0005840-IEA;GO:0006412-IEA	structural constituent of ribosome-IBA;structural constituent of ribosome-IEA;zinc ion binding-IEA;metal ion binding-IEA;mitochondrion-IEA;membrane-IEA;integral component of membrane-IEA;mitochondrial large ribosomal subunit-IBA;ribosome-IEA;translation-IEA	5	GO:0003735;GO:0005762;GO:0006412;GO:0008270;GO:0016021	structural constituent of ribosome;mitochondrial large ribosomal subunit;translation;zinc ion binding;integral component of membrane	-	-	IPR038657;IPR001857;IPR001857;IPR008991	HOMOLOGOUS_SUPERFAMILY;FAMILY;FAMILY;FAMILY;HOMOLOGOUS_SUPERFAMILY	Ribosomal protein L19 superfamily;Ribosomal protein L19;Ribosomal protein L19;Ribosomal protein L19;Translation protein SH3-like domain superfamily	G3DSA:2.30.30.790 (GENE3D);PF01245 (PFAM);PTHR15680 (PANTHER);PTHR15680:SF9 (PANTHER);SSF50104 (SUPERFAMILY)	;translation/ribosome/structural constituent of ribosome;translation/ribosome/structural constituent of ribosome;
transcript_ACOC_0000009701-mRNA-1	ribosomal protein L19	MTSFSVSPMMRLVQAVAVQRFSCRNSAEIGLKKRMEELKHIPDFPLIYPDFLQSPVWNRRNKLKEELEHQDMLERRMNIDIPEFYVGSILAVTTSEKYLGSKEHRFVGICIRREKEGLHHQFTLRNVIEGIGVEVMYDLYNPTIRKIETLKLEKRLDRDLSYLADALPEYSTFDFHMEPTSHPAGAPVPINPIKVKLQPPPWSRRWELYDYKGIDGAWAGATPYFKRKFHKTKMNDYLRYDLIADYRVSSDLEHELNVEEKMQKFEKERHEAGLTRRRIFRSAAALNRPSSQILDVSIDS	300	20	0	0.8463	CAEBREN_30208;mrpl-19;ANCCAN_14162;FL83_14696;WR25_15280;Acey_s0333.g2811;HPLM_LOCUS11978;ANCCEY_12594;DICVIV_00973;HPLM_LOCUS11978;ACOC_LOCUS98;ANCCEY_12594;HPLM_LOCUS11978;mrpl-19;CAEBREN_30936;TELCIR_15609;NBR_LOCUS8232;HPLM_LOCUS11978;mrpl-19;ANCCEY_12594;DICVIV_00973;Cni-mrpl-19;CRE_03651;ANCCAN_14162;mrpl-19;mrpl-19;HPLM_LOCUS11978;CAEBREN_30208;mrpl-19;Cni-mrpl-19;NECAME_05595;DICVIV_00973…	GO:0003735-IBA;GO:0003735-IEA;GO:0008270-IEA;GO:0046872-IEA;GO:0005739-IEA;GO:0016020-IEA;GO:0016021-IEA;GO:0005762-IBA;GO:0005840-IEA;GO:0006412-IEA	structural constituent of ribosome-IBA;structural constituent of ribosome-IEA;zinc ion binding-IEA;metal ion binding-IEA;mitochondrion-IEA;membrane-IEA;integral component of membrane-IEA;mitochondrial large ribosomal subunit-IBA;ribosome-IEA;translation-IEA	5	GO:0003735;GO:0005762;GO:0006412;GO:0008270;GO:0016021	structural constituent of ribosome;mitochondrial large ribosomal subunit;translation;zinc ion binding;integral component of membrane	-	-	IPR001857;IPR038657;IPR001857;IPR008991	FAMILY;HOMOLOGOUS_SUPERFAMILY;FAMILY;FAMILY;HOMOLOGOUS_SUPERFAMILY	Ribosomal protein L19;Ribosomal protein L19 superfamily;Ribosomal protein L19;Ribosomal protein L19;Translation protein SH3-like domain superfamily	PF01245 (PFAM);G3DSA:2.30.30.790 (GENE3D);PTHR15680 (PANTHER);PTHR15680:SF9 (PANTHER);SSF50104 (SUPERFAMILY)	translation/ribosome/structural constituent of ribosome;translation/ribosome/structural constituent of ribosome;
MSTRG.86.1	hypothetical protein Angca_009728, partial	MGDELTTEIVQLIATSRGSVGNSTASRPSISKTQASVVHVETIIVHSSCGENCSRAITIEMWTIRREWNSQVTGLAPMFLKNAIRSHLHFSQLNSWISMQSGRLPDGVSCTYRIHLSAGELSRRDDEVTEHTFPVCRMDRQSVLVVSVKYVKAEQMPVPVGLCLTLGVLPIDQWLMPSPLESPTDDGPLIASSEAVTISSLKHKPLPPASPPSPDGPSPKFSAIAGPNDERPARRVLSTHMSTRTENRQDSKEIELLASRLQVIQSDHGRQRSKTRGSIFNKITGLPLHSSPAPLSRQRNNVAASDMVLPKSRRCRQQPSSLLGNFEESALNGRLDPVKTLNGFKLQLAASGSFSSPHTSLPVTAHFFDLDDNETAPSPYLGKCSLEALGRHGYRVPKQ…	520	20	0	0.763	ACOC_LOCUS99;ACOC_LOCUS99	GO:0016020-IEA;GO:0016021-IEA	membrane-IEA;integral component of membrane-IEA	1	GO:0016021	integral component of membrane	-	-	IPR033473;IPR025261	DOMAIN;DOMAIN;DOMAIN;DOMAIN	Protein FAM214/SPAC3H8.04, C-terminal;Domain of unknown function DUF4210;Domain of unknown function DUF4210;Domain of unknown function DUF4210	PF13889 (PFAM);PF13915 (PFAM);mobidb-lite (MOBIDB_LITE);PTHR13199 (PANTHER)	;
transcript_ACOC_0000009801-mRNA-1	unnamed protein product	MGDELTTEIVQLIATSRGSVGNSTASRPSISKTQASVVHVEGLAPMFLKNAIRSHLHFSQLNSWISMQSGRLPDGVSCTYRIHLSAGELSRRDDEVTEHTFPVCRMDRQSVLVVSVKYVKAEQMPVPVGLCLTLGVLPIDQWLMPSPLESPTDDGPLIASSEAVTISSLKHKPLPPASPPSPDGPSPKFSAIAGPNDERPARRVLSTHMSTRTENRQDSKEIELLASRLQVIQSDHGRQRSKTRGSIFNKITGLPLHSSPAPLSRQRNNVAASDMVLPKSRRCRQQPSSLLGNFEESALNGRLDPVKTLNGFKLQLELLWLFSLFNSLFILVVYFNINYKQLNILLFDSFLRFQTLFNPQDTVVKVFVITYDISDMPPSSQTFIRQRTFIGNDGDSKVD…	470	20	0	0.6873	ACOC_LOCUS99;ACOC_LOCUS99	GO:0016020-IEA;GO:0016021-IEA	membrane-IEA;integral component of membrane-IEA	1	GO:0016021	integral component of membrane	-	-	IPR033473	DOMAIN;DOMAIN;DOMAIN	Protein FAM214/SPAC3H8.04, C-terminal;Protein FAM214/SPAC3H8.04, C-terminal;Protein FAM214/SPAC3H8.04, C-terminal	PF13889 (PFAM);mobidb-lite (MOBIDB_LITE);PTHR13199 (PANTHER)	;
transcript_ACOC_0000009901-mRNA-1	CRE-TYR-4 protein	MLLISILASSLLMMVVAVVNNAKVERDPCASAPTESAKIICGQLHRWDEMARQAFKKKSALPPGAAATLPAELAPIASSIYQCMDLQCMCSYMRGDWLLLQQRRYHSYEQLSSFRKEIRMMTDDERQRYYSAIRMMKQNGEYDRVARMHTRSTVMGGAHSGPAFLPWHREYIKRLEFAIRQIDPTLALPYWDSTLEEALARPADSVMFSSDIGGSTNRQGFVNSGPFTQWQTLEGKPNIKREVGAKGGPMKQEEIDFVMRQSEVDQVLNTSVMCCKNELQGCPYRTDYNCLEYTHGNVHIFVGGDMFDTSTSANDPLFFLHHAFVDLIWEQWRQRRQSRAERERVYPPDNQLCASPQHFAAAQMNPFPPMRNIDGLSNKYTDNLYEYAPRPTCSEAYPD…	709	20	0	0.7454	Acey_s0012.g1647;NBR_LOCUS8234;Cni-tyr-4;Acey_s0012.g1647;NBR_LOCUS8234;tyr-4;Acey_s0012.g1647;Cbn-tyr-4;Cre-tyr-4;tyr-4;FL83_14275;L596_008363;Acey_s0012.g1647;L596_008363;NBR_LOCUS8234;Cni-tyr-4;ACOC_LOCUS100;FL81_20890;Cni-tyr-4;tyr-4;Acey_s0012.g1647;Cbn-tyr-4;HPLM_LOCUS14510;GCK72_001023;Cbn-tyr-4;tyr-4;DICVIV_00976;NBR_LOCUS8234;Acey_s0012.g1647;Cni-tyr-4;HPLM_LOCUS14510;GCK72_001023;ACOC_L…	GO:0042438-IEA;GO:0033162-IEA;GO:0046872-IEA;GO:0016716-IEA;GO:0016491-IEA;GO:0005507-IEA;GO:0055114-IEA	melanin biosynthetic process-IEA;melanosome membrane-IEA;metal ion binding-IEA;oxidoreductase activity, acting on paired donors, with incorporation or reduction of molecular oxygen, another compound as one donor, and incorporation of one atom of oxygen-IEA;oxidoreductase activity-IEA;copper ion binding-IEA;oxidation-reduction process-IEA	5	GO:0005507;GO:0016716;GO:0033162;GO:0042438;GO:0055114	copper ion binding;oxidoreductase activity, acting on paired donors, with incorporation or reduction of molecular oxygen, another compound as one donor, and incorporation of one atom of oxygen;melanosome membrane;melanin biosynthetic process;oxidation-reduction process	EC:1.14.18	Acting on paired donors, with incorporation or reduction of molecular oxygen. The oxygen incorporated need not be derived from O(2)	IPR002227;IPR003582;IPR002227;IPR008922;IPR015559;IPR003582;IPR003582;IPR003582;IPR003582;IPR008922	DOMAIN;DOMAIN;DOMAIN;HOMOLOGOUS_SUPERFAMILY;HOMOLOGOUS_SUPERFAMILY;FAMILY;DOMAIN;DOMAIN;DOMAIN;DOMAIN;HOMOLOGOUS_SUPERFAMILY	Tyrosinase copper-binding domain;ShKT domain;Tyrosinase copper-binding domain;Uncharacterised domain, di-copper centre;Uncharacterised domain, di-copper centre;Putative tyrosinase-like, Tyr-3;ShKT domain;ShKT domain;ShKT domain;ShKT domain;Uncharacterised domain, di-copper centre	PR00092 (PRINTS);PF01549 (PFAM);PF00264 (PFAM);G3DSA:1.10.1280.10 (GENE3D);PTHR11474 (PANTHER);PTHR11474:SF21 (PANTHER);PS51670 (PROSITE_PROFILES);PS51670 (PROSITE_PROFILES);PS51670 (PROSITE_PROFILES);PS51670 (PROSITE_PROFILES);SSF48056 (SUPERFAMILY)	oxidoreductase activity;oxidoreductase activity;oxidation-reduction process/copper ion binding/melanin biosynthetic process/melanosome membrane/oxidoreductase activity, acting on paired donors, with incorporation or reduction of molecular oxygen, another compound as one donor, and incorporation of one atom of oxygen;
MSTRG.87.3	CRE-TYR-4 protein	MLLISILASSLLMMVVAVVNNAKVERDPCASAPTESAKIICGQLHRWDEMAREQAFKKKSALPPGAAATLPAELAPIASSIYQCMDLQCMCSYMRGIAAPDGQCRLPNGQILEKAIRKEIRMMTDDERQRYYSAIRMMKQNGEYDRVARMHTRSTVMGGAHSGPAFLPWHREYIKRLEFAIRQIDPTLALPYWDSTLEEALARPADSVMFSSDIGGSTNRQGFVNSGPFTQWQTLEGKPNIKREVGAKGGPMKQEEIDFVMRQSEVDQVLAFSSPRRGCPYRTDYNCLEYTHGNVHIFVGGDMFDTSTSANDPLFFLHHAFVDLIWEQWRQRRQSRAERERVYPPDNQLCASPQHFAAAQMNPFPPMRNIDGLSNKYTDNLYEYAPRPTCSEAYPDCGS…	585	20	0	0.7868	Acey_s0012.g1647;NBR_LOCUS8234;Cni-tyr-4;Acey_s0012.g1647;NBR_LOCUS8234;tyr-4;Acey_s0012.g1647;Cbn-tyr-4;Cre-tyr-4;tyr-4;Acey_s0012.g1647;NBR_LOCUS8234;Cni-tyr-4;FL81_20890;ACOC_LOCUS100;Cni-tyr-4;tyr-4;Acey_s0012.g1647;Cbn-tyr-4;HPLM_LOCUS14510;PRIPAC_38096;FL82_07894;GCK72_001023;Cbn-tyr-4;tyr-4;DICVIV_00976;NBR_LOCUS8234;Acey_s0012.g1647;Cni-tyr-4;HPLM_LOCUS14510;GCK72_001023;ACOC_LOCUS100;GCK…	GO:0042438-IEA;GO:0033162-IEA;GO:0046872-IEA;GO:0016716-IEA;GO:0016491-IEA;GO:0005507-IEA;GO:0055114-IEA	melanin biosynthetic process-IEA;melanosome membrane-IEA;metal ion binding-IEA;oxidoreductase activity, acting on paired donors, with incorporation or reduction of molecular oxygen, another compound as one donor, and incorporation of one atom of oxygen-IEA;oxidoreductase activity-IEA;copper ion binding-IEA;oxidation-reduction process-IEA	5	GO:0005507;GO:0016716;GO:0033162;GO:0042438;GO:0055114	copper ion binding;oxidoreductase activity, acting on paired donors, with incorporation or reduction of molecular oxygen, another compound as one donor, and incorporation of one atom of oxygen;melanosome membrane;melanin biosynthetic process;oxidation-reduction process	EC:1.14.18	Acting on paired donors, with incorporation or reduction of molecular oxygen. The oxygen incorporated need not be derived from O(2)	IPR002227;IPR002227;IPR003582;IPR008922;IPR015559;IPR003582;IPR003582;IPR008922	DOMAIN;DOMAIN;DOMAIN;HOMOLOGOUS_SUPERFAMILY;FAMILY;FAMILY;DOMAIN;DOMAIN;HOMOLOGOUS_SUPERFAMILY	Tyrosinase copper-binding domain;Tyrosinase copper-binding domain;ShKT domain;Uncharacterised domain, di-copper centre;Putative tyrosinase-like, Tyr-3;Putative tyrosinase-like, Tyr-3;ShKT domain;ShKT domain;Uncharacterised domain, di-copper centre	PR00092 (PRINTS);PF00264 (PFAM);PF01549 (PFAM);G3DSA:1.10.1280.10 (GENE3D);PTHR11474:SF21 (PANTHER);PTHR11474 (PANTHER);PS51670 (PROSITE_PROFILES);PS51670 (PROSITE_PROFILES);SSF48056 (SUPERFAMILY)	oxidoreductase activity;oxidoreductase activity;oxidation-reduction process/copper ion binding/melanin biosynthetic process/melanosome membrane/oxidoreductase activity, acting on paired donors, with incorporation or reduction of molecular oxygen, another compound as one donor, and incorporation of one atom of oxygen;
transcript_ACOC_0000010201-mRNA-1	Uncharacterised protein family UPF0057 domain containing protein	MSEKSEGQVFVVDNRRRDELIKTVLIIVLIIIFPPAAIAVQANECNIHVVISLFLMFFFIIPAYIHAVWYCFIRKAPEHIIA	82	20	4.6e-52	0.9229	ANCCAN_14171;FL83_22811;L596_008340;ANCCEY_10993;HPBE_LOCUS17240;DICVIV_00977;L596_008340;ANCCAN_14171;FL83_22811;Cni-T23B3.2;DICVIV_00977;NBR_LOCUS8235;Cni-T23B3.2;CRE_28524;HPLM_LOCUS16475;CRE_28524;Cni-T23B3.2;CBG12708;CELE_T23B3.2;TELCIR_06066;CAEBREN_12185;ACOC_LOCUS103;ANCCEY_10993;ANCDUO_04572;Acey_s0012.g1642;HPLM_LOCUS16475;CAEBREN_12185;NBR_LOCUS8235;CBG12708;CELE_T23B3.2;TELCIR_06066;C…	GO:0016020-IEA;GO:0016021-IEA	membrane-IEA;integral component of membrane-IEA	1	GO:0016021	integral component of membrane	-	-	IPR000612;IPR000612	FAMILY;FAMILY;FAMILY	Proteolipid membrane potential modulator;Proteolipid membrane potential modulator;Proteolipid membrane potential modulator	PF01679 (PFAM);PTHR21659 (PANTHER);PTHR21659:SF10 (PANTHER)	integral component of membrane;integral component of membrane;
MSTRG.89.2	Bardet-Biedl syndrome 1 protein	MTSSNMYGDGDTKLVVAHIGGSKFNLRLKVIRGVTVVGECALAEMPTAVVSFYNEKATLPAIGVASGSFIRVYKNLKPFYQYNTPSAPVHSVEQEAWTKTAAKQLTHDELFTVIQNLANETLEHRHNGIQLS	132	20	4.4e-74	0.8282	ASIM_LOCUS15514;TCNE_LOCUS18526;NECAME_05590;ANCDUO_24146;OESDEN_03327;EVEC_LOCUS5629;Acey_s0012.g1641;ANCCEY_10992;ACOC_LOCUS104;ANCDUO_13872;BBS1;ASIM_LOCUS15514;ANCCEY_10992;ANCCAN_14172;HPLM_LOCUS11069;EVEC_LOCUS5629;SVUK_LOCUS7198;Acey_s0012.g1641;ASIM_LOCUS197;OESDEN_03327;DICVIV_00978;BBS1;NECAME_05590;HPLM_LOCUS11069;TCNE_LOCUS18526;ANCCAN_14172;ANCDUO_13872;ASIM_LOCUS197;DICVIV_00978;ANC…	GO:0034464-IEA;GO:1905515-IEA	BBSome-IEA;non-motile cilium assembly-IEA	2	GO:0034464;GO:1905515	BBSome;non-motile cilium assembly	-	-	IPR032728;IPR028784	DOMAIN;FAMILY	Bardet-Biedl syndrome 1, N-terminal;Bardet-Biedl syndrome 1 protein	PF14779 (PFAM);PTHR20870 (PANTHER)	;non-motile cilium assembly/BBSome
MSTRG.89.3	Bardet-Biedl syndrome 1 protein homolog	MTSSNMYGDGDTKLVVAHIGGSKFNLRLKVIRGVTVVGECALAEMPTAVVSFYNEKATLPAIGVASGSFIRVYKNLKPFYQYNTPSAPVHSVEQEAWTKTAAKQLTHDELFTVIQNLANEISSSLLTPMSRTLLTIKPEERSAFIDYYAVPKYVNNFRNPRASSMFTFE	169	20	7.5e-103	0.8026	TCNE_LOCUS18526;OESDEN_03327;ANCCEY_10992;BBS1;ASIM_LOCUS15514;ANCCAN_14172;bbs-1;ASIM_LOCUS197;bbs-1;BBS1;bbs-1;bbs-1;bbs-1;NECAME_05590;HPLM_LOCUS11069;TCNE_LOCUS18526;ANCCAN_14172;bbs-1;ASIM_LOCUS197;bbs-1;bbs-1;bbs-1;bbs-1;ASIM_LOCUS15514;NECAME_05590;bbs-1;ANCDUO_24146;EVEC_LOCUS5629;Acey_s0012.g1641;bbs-1;bbs-1;bbs-1;bbs-1;bbs-1;ACOC_LOCUS104;ANCDUO_13872;bbs-1;bbs-1;ANCCEY_10992;bbs-1;HPLM…	GO:0005856-IEA;GO:0005119-IBA;GO:0005737-IEA;GO:0005813-IBA;GO:0005929-IEA;GO:0035721-IMP;GO:0036064-IDA;GO:0036064-IBA;GO:0030030-IEA;GO:0034464-IBA;GO:0034464-IEA;GO:0015031-IEA;GO:1905515-IBA;GO:1905515-IEP;GO:1905515-IEA;GO:0043005-IDA;GO:0005113-IBA;GO:0061512-IBA;GO:0061512-IMP;GO:0042995-IEA;GO:0003674-ND;GO:0005930-IDA;GO:0005930-IBA	cytoskeleton-IEA;smoothened binding-IBA;cytoplasm-IEA;centrosome-IBA;cilium-IEA;intraciliary retrograde transport-IMP;ciliary basal body-IDA;ciliary basal body-IBA;cell projection organization-IEA;BBSome-IBA;BBSome-IEA;protein transport-IEA;non-motile cilium assembly-IBA;non-motile cilium assembly-IEP;non-motile cilium assembly-IEA;neuron projection-IDA;patched binding-IBA;protein localization to…	8	GO:0005102;GO:0005930;GO:0034464;GO:0035721;GO:0036064;GO:0043005;GO:0061512;GO:1905515	signaling receptor binding;axoneme;BBSome;intraciliary retrograde transport;ciliary basal body;neuron projection;protein localization to cilium;non-motile cilium assembly	-	-	IPR032728;IPR028784	DOMAIN;FAMILY	Bardet-Biedl syndrome 1, N-terminal;Bardet-Biedl syndrome 1 protein	PF14779 (PFAM);PTHR20870 (PANTHER)	;non-motile cilium assembly/BBSome
MSTRG.89.4	Bardet-Biedl syndrome 1 protein homolog	MTSSNMYGDGDTKLVVAHIGGSKFNLRLKVIRGVTVVGECALAEMPTAVVSFYNEKATLPAIGVASGSFIRVYKNLKPFYQYNTPSAPVHSVEQEAWTKTAAKQLTHDELFTVIQNLANEISSSLLTPMSRTLLTIKPEERSAFIDYYAVPKYVNNFRNPETIACLSTMPKSTIDNLEVLVFGTERGMVFVVDSQAFQVIAECQISGVPVQIVTYGVFDVEYRCFVSTRNGNIFCVKRAQTVKEKPIISCKTDIVSFNILNKIVAVATTDHMLFFYSFAGKCLNSIAIGESINGLEPFRYAPKQFEGILVLLENQIRLYTHLHLLDIIKTERSLSWMKFGQFGREEGALIVGTSDGGLFVKLFRRKASLDERVDLAAPPKPYNIKLNIPKKSKIFIDQT…	414	20	0	0.7878	CGOC_LOCUS10349;ANCDUO_03759;ANCCEY_10992;Bma-bbs-1;Bma-bbs-1;BBS1;ASIM_LOCUS15514;bbs-1;ASIM_LOCUS197;bbs-1;BBS1;bbs-1;bbs-1;bbs-1;NECAME_05590;HPLM_LOCUS11069;bbs-1;ASIM_LOCUS197;Bma-bbs-1;bbs-1;bbs-1;ASIM_LOCUS15514;bbs-1;bbs-1;TELCIR_06842;NECAME_05590;bbs-1;Bma-bbs-1;Bma-bbs-1;Bma-bbs-1;Bma-bbs-1;EVEC_LOCUS5629;Acey_s0012.g1641;bbs-1;bbs-1;bbs-1;bbs-1;bbs-1;Bma-bbs-1;ANCDUO_13872;bbs-1;bbs-1…	GO:0005856-IEA;GO:0005119-IBA;GO:0005737-IEA;GO:0005813-IBA;GO:0005929-IEA;GO:0035721-IMP;GO:0035721-IEA;GO:0036064-IDA;GO:0036064-IBA;GO:0036064-IEA;GO:0030030-IEA;GO:0034464-IBA;GO:0034464-IEA;GO:0015031-IEA;GO:1905515-IBA;GO:1905515-IEP;GO:1905515-IEA;GO:0043005-IDA;GO:0043005-IEA;GO:0005113-IBA;GO:0061512-IBA;GO:0061512-IMP;GO:0061512-IEA;GO:0042995-IEA;GO:0003674-ND;GO:0005930-IDA;GO:0005930…	cytoskeleton-IEA;smoothened binding-IBA;cytoplasm-IEA;centrosome-IBA;cilium-IEA;intraciliary retrograde transport-IMP;intraciliary retrograde transport-IEA;ciliary basal body-IDA;ciliary basal body-IBA;ciliary basal body-IEA;cell projection organization-IEA;BBSome-IBA;BBSome-IEA;protein transport-IEA;non-motile cilium assembly-IBA;non-motile cilium assembly-IEP;non-motile cilium assembly-IEA;neur…	8	GO:0005102;GO:0005930;GO:0034464;GO:0035721;GO:0036064;GO:0043005;GO:0061512;GO:1905515	signaling receptor binding;axoneme;BBSome;intraciliary retrograde transport;ciliary basal body;neuron projection;protein localization to cilium;non-motile cilium assembly	-	-	IPR032728;IPR028784;IPR036322	DOMAIN;FAMILY;HOMOLOGOUS_SUPERFAMILY	Bardet-Biedl syndrome 1, N-terminal;Bardet-Biedl syndrome 1 protein;WD40-repeat-containing domain superfamily	PF14779 (PFAM);PTHR20870 (PANTHER);SSF50978 (SUPERFAMILY)	;non-motile cilium assembly/BBSome;protein binding
MSTRG.90.1	nematode cuticle collagen domain protein	MFIVGFASTIALVTTVACLVSIAVIVSDINDLRDNILSTIGNFKDVADSTWIEIVNLNTHPNGNRGAPSTFASIFGRHKRASFPPECNCGPLPENCPLGPPGPPGISGLPGLDGEDGPDGRPGVKELHLLSRTVFQADALRRDGERGLRGPDGEIGIPGPKGPVGEPGLAGIPGIAGKDGYPGAPGCRGLPAMPAPRGEMGPKGYPGGQGKMGERGPPGERGPAGPPGHPGNRGTPGPPGTNGKLGMPGRPGLDGGYCPCPPHGRLRL	268	20	1.3e-143	0.5976	TELCIR_13045;DICVIV_11059;col-184;NECAME_11203;ANCCAN_14175;HPLM_LOCUS19905;ASIM_LOCUS11636;Cre-dpy-5;NOO_LOCUS11273;Cre-dpy-5;TELCIR_07062;Acey_s0012.g1640;ANCDUO_03758;NOO_LOCUS10424;Acey_s0012.g1640;TELCIR_07062;HPLM_LOCUS19905;ACOC_LOCUS106;Cre-dpy-5;ANCDUO_03758;DICVIV_11059;NECAME_11203;NOO_LOCUS11273;NECAME_05588;NOO_LOCUS10424;DICVIV_11059;NOO_LOCUS10424;NECAME_11203;Cni-col-184;Cre-dpy-5…	GO:0042329-IEA;GO:0060102-IEA;GO:0040014-IEA;GO:0040002-IEA;GO:0016020-IEA;GO:0005581-IEA;GO:0016021-IEA;GO:0040032-IEA;GO:0042302-IEA;GO:0042338-IEA	structural constituent of collagen and cuticulin-based cuticle-IEA;collagen and cuticulin-based cuticle extracellular matrix-IEA;regulation of multicellular organism growth-IEA;collagen and cuticulin-based cuticle development-IEA;membrane-IEA;collagen trimer-IEA;integral component of membrane-IEA;post-embryonic body morphogenesis-IEA;structural constituent of cuticle-IEA;cuticle development invol…	2	GO:0016020;GO:0042302	membrane;structural constituent of cuticle	-	-	IPR002486;IPR008160	DOMAIN;DOMAIN;REPEAT;REPEAT;REPEAT;REPEAT;REPEAT;REPEAT;REPEAT	Nematode cuticle collagen, N-terminal;Nematode cuticle collagen, N-terminal;Collagen triple helix repeat;Collagen triple helix repeat;Collagen triple helix repeat;Collagen triple helix repeat;Collagen triple helix repeat;Collagen triple helix repeat;Collagen triple helix repeat	PF01484 (PFAM);G3DSA:1.20.5.320 (GENE3D);PF01391 (PFAM);mobidb-lite (MOBIDB_LITE);mobidb-lite (MOBIDB_LITE);mobidb-lite (MOBIDB_LITE);mobidb-lite (MOBIDB_LITE);PTHR24637:SF272 (PANTHER);PTHR24637 (PANTHER)	structural constituent of cuticle;
transcript_ACOC_0000010501-mRNA-1	nematode cuticle collagen domain protein	MFIVGFASTIALVTTVACLVSIAVIVSDINDLRDNILSTIGNFKDVADSTWIEIVNLNTHPNGNRGAPSTFASIFGRHKRASFPPECNCGPLPENCPLGPPGPPGISGLPGLDGEDGPDGRPGGIALAVTHRIPGGCIECLPGPPGLQGPRGSAGLPGRDGERGLRGPDGEIGIPGPKGPVGEPGLAGIPGIAGKDGYPGAPGCRGLPAMPAPRGEMGPKGYPGGQGKMGERGPPGERGPAGPPGHPGNRGTPGPPGTNGKLGMPGRPGLDGGYCPCPPHGRLRL	285	20	0	0.6638	DICVIV_11059;dpy-5;dpy-5;Cre-dpy-5;Cre-dpy-5;NOO_LOCUS10424;TELCIR_07062;Cre-dpy-5;DICVIV_11059;SVUK_LOCUS4116;NECAME_05588;SVUK_LOCUS4116;DICVIV_11059;NOO_LOCUS10424;Cre-dpy-5;dpy-5;ANCCAN_14175;dpy-5;dpy-5;NECAME_05588;dpy-5;Cre-dpy-5;DICVIV_11059;dpy-5;OESDEN_06324;HPLM_LOCUS19905;dpy-5;dpy-5;NAV_LOCUS1071;TELCIR_13045;TCLT_LOCUS9226;ANCCAN_14175;HPLM_LOCUS19905;NAV_LOCUS1071;TELCIR_07062;Acey…	GO:0042329-IDA;GO:0042329-IEA;GO:0060102-IDA;GO:0060102-IEA;GO:0040014-IMP;GO:0040014-IEA;GO:0040002-IMP;GO:0040002-IEA;GO:0016020-IEA;GO:0005581-IEA;GO:0040032-IMP;GO:0040032-IEA;GO:0016021-IEA;GO:0042302-IEA;GO:0042338-IMP;GO:0042338-IEA	structural constituent of collagen and cuticulin-based cuticle-IDA;structural constituent of collagen and cuticulin-based cuticle-IEA;collagen and cuticulin-based cuticle extracellular matrix-IDA;collagen and cuticulin-based cuticle extracellular matrix-IEA;regulation of multicellular organism growth-IMP;regulation of multicellular organism growth-IEA;collagen and cuticulin-based cuticle developm…	4	GO:0005581;GO:0016021;GO:0040002;GO:0042302	collagen trimer;integral component of membrane;collagen and cuticulin-based cuticle development;structural constituent of cuticle	-	-	IPR008160;IPR002486	REPEAT;DOMAIN;DOMAIN;DOMAIN;DOMAIN;DOMAIN;DOMAIN;DOMAIN	Collagen triple helix repeat;Nematode cuticle collagen, N-terminal;Nematode cuticle collagen, N-terminal;Nematode cuticle collagen, N-terminal;Nematode cuticle collagen, N-terminal;Nematode cuticle collagen, N-terminal;Nematode cuticle collagen, N-terminal;Nematode cuticle collagen, N-terminal	PF01391 (PFAM);PF01484 (PFAM);mobidb-lite (MOBIDB_LITE);mobidb-lite (MOBIDB_LITE);mobidb-lite (MOBIDB_LITE);mobidb-lite (MOBIDB_LITE);PTHR24637 (PANTHER);PTHR24637:SF272 (PANTHER)	;structural constituent of cuticle;
MSTRG.91.1	hypothetical protein Y032_0325g2549	MTEDISYEEHVQQNNQRLISIKTSLMEENSFPSACTELTQWCADQRAFSSYFEENLLAALQVAVENGIKEGFDFALAHQLISACFTHRKLLSKGSATQINRWYEQFRRLKKGGGKRKRKTEPSQPTGPLLVDPTVKTVTVADRSR	145	20	5.3e-80	0.836	CRE_25970;CRE_25970	GO:0016020-IEA;GO:0016021-IEA	membrane-IEA;integral component of membrane-IEA	1	GO:0016020	membrane	-	-	IPR040797	DOMAIN;DOMAIN	Zmiz1, N-terminal tetratricopeptide repeat domain;Zmiz1, N-terminal tetratricopeptide repeat domain	PF18028 (PFAM);mobidb-lite (MOBIDB_LITE)	;
MSTRG.92.1	MIZ/SP-RING zinc finger	MWPSAGPMLQSPTYPPGPAPTAMMQPMSGYGMQPSPYPMDPAGARPQYPPMPDQSAGIYDQNMMNYNQQQQQQQQQQQQRMMMLHQQQQIQQAQAHARARRVPSMPMPQQPGQPFDPMYQGVPMGVNNVPGQTQPLMRYPQGTMTSPSYPMPTAAGPRPNNMMTSPAYPQMYRAGAPVLYGQVQQHAQHQQVVSYPNPNVPPDERYNVPYPQDSSPPVILSKEVIMRPFGLEHNMNHHTFTFNLRTEIIQQLQSPFIDIQLKSFHKDDKKIATQWPPKQTSNGHSVPGTHPECSIQVLINGQMVPIPDLSRSLFIKQVVVHGPNTIEFNVNQCVCSHSFIMQLVVRQPLSKVTQDIFTRTQNCTAETCRDKLLKLAPPTGLRVPLVCDITHRRMSIPAR…	704	20	0	0.8614	SVUK_LOCUS13364;ANCCEY_03975;ANCCAN_05990;HPBE_LOCUS17062;Acey_s0325.g2547;NECAME_10376	GO:0008270-IEA	zinc ion binding-IEA	1	GO:0008270	zinc ion binding	-	-	IPR004181;IPR013083;IPR004181	DOMAIN;HOMOLOGOUS_SUPERFAMILY;HOMOLOGOUS_SUPERFAMILY;HOMOLOGOUS_SUPERFAMILY;HOMOLOGOUS_SUPERFAMILY;HOMOLOGOUS_SUPERFAMILY;HOMOLOGOUS_SUPERFAMILY;HOMOLOGOUS_SUPERFAMILY;HOMOLOGOUS_SUPERFAMILY;HOMOLOGOUS_SUPERFAMILY;HOMOLOGOUS_SUPERFAMILY;HOMOLOGOUS_SUPERFAMILY;HOMOLOGOUS_SUPERFAMILY;DOMAIN	Zinc finger, MIZ-type;Zinc finger, RING/FYVE/PHD-type;Zinc finger, RING/FYVE/PHD-type;Zinc finger, RING/FYVE/PHD-type;Zinc finger, RING/FYVE/PHD-type;Zinc finger, RING/FYVE/PHD-type;Zinc finger, RING/FYVE/PHD-type;Zinc finger, RING/FYVE/PHD-type;Zinc finger, RING/FYVE/PHD-type;Zinc finger, RING/FYVE/PHD-type;Zinc finger, RING/FYVE/PHD-type;Zinc finger, RING/FYVE/PHD-type;Zinc finger, RING/FYVE/PH…	PF02891 (PFAM);G3DSA:3.30.40.10 (GENE3D);mobidb-lite (MOBIDB_LITE);mobidb-lite (MOBIDB_LITE);mobidb-lite (MOBIDB_LITE);mobidb-lite (MOBIDB_LITE);mobidb-lite (MOBIDB_LITE);mobidb-lite (MOBIDB_LITE);mobidb-lite (MOBIDB_LITE);mobidb-lite (MOBIDB_LITE);mobidb-lite (MOBIDB_LITE);mobidb-lite (MOBIDB_LITE);PTHR10782 (PANTHER);PS51044 (PROSITE_PROFILES)	zinc ion binding;zinc ion binding
transcript_ACOC_0000010901-mRNA-1	Collagen alpha-5(IV) chain	MDLEHRIRAYRFVAYSAVTFSVVSVLSVCITLPMVYNYVHHVKKIMHNEINFCKGSAKDIWSEVNNLKNLPSGNRTARHSGYASGDISRGGGGGGGSGGGNCNSCCLPGPAGPTGTPGKPGRPGKPGAPGLPGNPGRPPQQPCEPITPPPCRPCPQGPPGPPGLAGPPGDAGAPGNPGAPGSGGQPGPPGPKGPPGASGKPGAAGSPGQAGAPAISEPLVPGPPGAPGAPGPRGPPGPDGQPGQPGGPGQPGPKGPMGPNGQPGAAGNPGVPGQAGPPGSAGEPGICPKYCAIDGGAYRFVAYAAVTFSVVSVLSVCVTLPMVHNYVHHVKRTMHNEINLCKGSAKDIWSEVNQLKNLPSVNRTARQAGYGDLDVSRGNTNLGGNCNSCCLPGPAGPQG…	589	20	0	0.7823	FL82_07619;FL82_07619;ACOC_LOCUS110;HPBE_LOCUS22930;TCNE_LOCUS13686;col-3;Cnig_chr_IV.g13969;TCNE_LOCUS13686;NECAME_10377;ACOC_LOCUS110;FL82_07619;SRAE_2000434700;col-3;TCNE_LOCUS13686;SRAE_2000439500;CRE_13728;col-125;HPBE_LOCUS22930;ANCCAN_05993;col-125;col-125;SRAE_2000434700;ACOC_LOCUS110;GCK72_014080;ASIM_LOCUS13706;TCNE_LOCUS15239;Cnig_chr_IV.g15636;CRE_13728;TCNE_LOCUS15239;Cnig_chr_IV.g13…	GO:0016020-IEA;GO:0016021-IEA;GO:0005581-IEA;GO:0042302-IEA	membrane-IEA;integral component of membrane-IEA;collagen trimer-IEA;structural constituent of cuticle-IEA	3	GO:0005581;GO:0016021;GO:0042302	collagen trimer;integral component of membrane;structural constituent of cuticle	-	-	IPR002486;IPR008160	DOMAIN;REPEAT;REPEAT;REPEAT;REPEAT;REPEAT;REPEAT;REPEAT;REPEAT;REPEAT;REPEAT;REPEAT	Nematode cuticle collagen, N-terminal;Collagen triple helix repeat;Collagen triple helix repeat;Collagen triple helix repeat;Collagen triple helix repeat;Collagen triple helix repeat;Collagen triple helix repeat;Collagen triple helix repeat;Collagen triple helix repeat;Collagen triple helix repeat;Collagen triple helix repeat;Collagen triple helix repeat	PF01484 (PFAM);PF01391 (PFAM);mobidb-lite (MOBIDB_LITE);mobidb-lite (MOBIDB_LITE);mobidb-lite (MOBIDB_LITE);mobidb-lite (MOBIDB_LITE);mobidb-lite (MOBIDB_LITE);mobidb-lite (MOBIDB_LITE);mobidb-lite (MOBIDB_LITE);mobidb-lite (MOBIDB_LITE);PTHR24637:SF269 (PANTHER);PTHR24637 (PANTHER)	structural constituent of cuticle;
MSTRG.94.1	Collagen alpha-5(IV) chain	MESSAKTESKKDSAKKILYEARSINTVPPSNRTVRQLSYSDAAVKDFEEDICAECCLPGPPGPQGPPGRPGRPGAPGRPPQEPCEEITPPPCPPSPPGPRGPPGKQGSPGAPGPSGNPGKPGADALPNPPGLKGPPGPPGDIGLSGQPGLPEEDAVINIIPGQPGPIGPPGQPGPPGPDGMQGPPGAIGEIGLKGAQRPEERPGADGNPGASGESGSPGTPGARGICPKYCAIDGGVFFEDGSRQ	245	20	3.7e-154	0.569	FL82_07619;FL82_07619;Cnig_chr_V.g19157;HPBE_LOCUS22930;Cnig_chr_IV.g13969;DICVIV_01108;col-3;col-157.1;FL82_07619;CAEBREN_28117;SRAE_2000434700;Cnig_chr_V.g19157;col-3;OESDEN_11635;SRAE_2000439500;CRE_13728;Cnig_chr_V.g19185;col-125;CAEBREN_28117;Cnig_chr_V.g19185;col-157.1;col-157.2;HPBE_LOCUS22930;col-125;col-125;SRAE_2000434700;col-157.1;GCK72_014080;Cnig_chr_V.g19185;col-157.2;Cnig_chr_IV.g1…	GO:0016020-IEA;GO:0016021-IEA;GO:0005581-IEA;GO:0042302-IEA	membrane-IEA;integral component of membrane-IEA;collagen trimer-IEA;structural constituent of cuticle-IEA	2	GO:0016021;GO:0042302	integral component of membrane;structural constituent of cuticle	-	-	IPR008160	REPEAT;REPEAT;REPEAT;REPEAT;REPEAT;REPEAT;REPEAT	Collagen triple helix repeat;Collagen triple helix repeat;Collagen triple helix repeat;Collagen triple helix repeat;Collagen triple helix repeat;Collagen triple helix repeat;Collagen triple helix repeat	PF01391 (PFAM);mobidb-lite (MOBIDB_LITE);mobidb-lite (MOBIDB_LITE);mobidb-lite (MOBIDB_LITE);mobidb-lite (MOBIDB_LITE);PTHR24637:SF269 (PANTHER);PTHR24637 (PANTHER)	;
transcript_ACOC_0000011001-mRNA-1	Collagen alpha-5(IV) chain	MESSAKTESFSETAAAFGQDPELTYIDGYGNVGKYWYRKHRVKAYRFVAFTAGLFSAVSVISFGITLPIFVKHIIEVRREIGNDVRYCKDSAKKILYEARSINTVPPSNRTVRQLSYSDAAVKDFEEDICAECCLPGPPGPQGPPGRPGRPGAPGRPPQEPCEEITPPPCPPSPPGPRGPPGKQGSPGAPGPSGNPGKPGADALPNPPGLKGPPGPPGDIGLSGQPGLPEEDAVINIIPGQPGPIGPPGQPGPPGPDGMQGPPGAIGEIGLKGAQRPEERPGADGNPGASGESGSPGTPGARGICPKYCAIDGGVFFEDGSRQ	323	20	0	0.597	FL82_07619;FL82_07619;CAEBREN_11581;Cnig_chr_V.g19157;HPBE_LOCUS22930;Cnig_chr_IV.g13969;col-3;col-157.1;FL82_07619;CAEBREN_28117;SRAE_2000434700;Cnig_chr_V.g19157;CAEBREN_11581;col-3;OESDEN_11635;SRAE_2000439500;CRE_13728;Cnig_chr_V.g19185;col-125;CAEBREN_28117;Cnig_chr_V.g19185;col-157.1;col-157.2;HPBE_LOCUS22930;col-125;col-125;SRAE_2000434700;col-157.1;GCK72_014080;Cnig_chr_V.g19185;col-157.2…	GO:0016020-IEA;GO:0016021-IEA;GO:0005581-IEA;GO:0042302-IEA	membrane-IEA;integral component of membrane-IEA;collagen trimer-IEA;structural constituent of cuticle-IEA	2	GO:0016021;GO:0042302	integral component of membrane;structural constituent of cuticle	-	-	IPR002486;IPR008160	DOMAIN;REPEAT;REPEAT;REPEAT;REPEAT;REPEAT;REPEAT;REPEAT	Nematode cuticle collagen, N-terminal;Collagen triple helix repeat;Collagen triple helix repeat;Collagen triple helix repeat;Collagen triple helix repeat;Collagen triple helix repeat;Collagen triple helix repeat;Collagen triple helix repeat	PF01484 (PFAM);PF01391 (PFAM);mobidb-lite (MOBIDB_LITE);mobidb-lite (MOBIDB_LITE);mobidb-lite (MOBIDB_LITE);mobidb-lite (MOBIDB_LITE);PTHR24637 (PANTHER);PTHR24637:SF269 (PANTHER)	structural constituent of cuticle;
transcript_ACOC_0000011201-mRNA-1	unnamed protein product	MQSYNDGGNLHIHGKVYAMIRDLLKSSNLLIGDNSSYVTIYVYFLLMKIMIVLMMIGWSGHMSMPQTLSTMTFDGETRPNSSLPSAKPIKSDENPAKSFTKKQDL	105	2	6.8e-72	0.8525	DICVIV_04339;ACOC_LOCUS113;ACOC_LOCUS113;DICVIV_04339	GO:0016020-IEA;GO:0016021-IEA	membrane-IEA;integral component of membrane-IEA	1	GO:0016021	integral component of membrane	-	-	-	HOMOLOGOUS_SUPERFAMILY;HOMOLOGOUS_SUPERFAMILY	LEM/LEM-like domain superfamily;LEM/LEM-like domain superfamily	mobidb-lite (MOBIDB_LITE);mobidb-lite (MOBIDB_LITE)	;
MSTRG.96.1	MAN1 protein	MQSYNDGGNLHIHGKVYAMIRDLLKSSNLLIGDNSSYVTIYVYFLLMKIMIVLMMIGWSGHMSMPQTLSTMTFDDLITTGRHSSDVSNKTSRQYLFNMIPYDDIKSYVIVFVSLPPLLMKDIASLSDSELRDELVKYNVSVGPILGTTRSLYEKKLFKLIKEGSSKGDSAHPQKEKTSPPLKHSSSPSKSPSRGSLTLRTATQSTRRKTARSESEDEEPVVNSTFDKPLTSTPKSADEVASLAPSVPSRQTVRSSERRFHTTTSSSVPRSTPQIVHGYGGDQPGSTPPRKTVLPKTPPRPSTRVTTTTSYTLSQDSDRSGLFNKSNRTAFGTSSVGSRGLLDLGNTIGNDDDDDDGQESSRYIYTTRTAGPERRSPLRKAWDNLLGYDFKAGKVPGSQY…	726	20	0	0.7343	NECAME_04945;OESDEN_23615;OESDEN_23615;HPLM_LOCUS3931;OESDEN_23615;OESDEN_15059;ANCDUO_09608;ANCDUO_09608;OESDEN_23615;OESDEN_15059;NBR_LOCUS20518;OESDEN_15059;OESDEN_15059;OESDEN_15059;HPLM_LOCUS3931;NECAME_04945;Cre-lem-2;FL82_05643;WR25_01642;Cre-lem-2;FL82_05643;Acey_s0176.g557;NECAME_04945;Cre-lem-2;ANCCAN_12738;Cre-lem-2;FL82_05643;Acey_s0176.g557;NBR_LOCUS20518;ANCDUO_09608;Acey_s0176.g557…	GO:0005637-IEA;GO:1902531-IEA;GO:0016020-IEA;GO:0016021-IEA;GO:0006997-IEA;GO:0003676-IEA	nuclear inner membrane-IEA;regulation of intracellular signal transduction-IEA;membrane-IEA;integral component of membrane-IEA;nucleus organization-IEA;nucleic acid binding-IEA	5	GO:0003676;GO:0005637;GO:0006997;GO:0016021;GO:1902531	nucleic acid binding;nuclear inner membrane;nucleus organization;integral component of membrane;regulation of intracellular signal transduction	-	-	IPR003887;IPR011015;IPR041885;IPR012677;IPR003887;IPR011015	DOMAIN;HOMOLOGOUS_SUPERFAMILY;HOMOLOGOUS_SUPERFAMILY;HOMOLOGOUS_SUPERFAMILY;HOMOLOGOUS_SUPERFAMILY;HOMOLOGOUS_SUPERFAMILY;HOMOLOGOUS_SUPERFAMILY;HOMOLOGOUS_SUPERFAMILY;HOMOLOGOUS_SUPERFAMILY;HOMOLOGOUS_SUPERFAMILY;HOMOLOGOUS_SUPERFAMILY;DOMAIN;DOMAIN;HOMOLOGOUS_SUPERFAMILY	LEM domain;LEM/LEM-like domain superfamily;MAN1, winged-helix domain;Nucleotide-binding alpha-beta plait domain superfamily;Nucleotide-binding alpha-beta plait domain superfamily;Nucleotide-binding alpha-beta plait domain superfamily;Nucleotide-binding alpha-beta plait domain superfamily;Nucleotide-binding alpha-beta plait domain superfamily;Nucleotide-binding alpha-beta plait domain superfamily;…	PF03020 (PFAM);G3DSA:1.10.720.40 (GENE3D);G3DSA:1.10.10.1180 (GENE3D);G3DSA:3.30.70.330 (GENE3D);mobidb-lite (MOBIDB_LITE);mobidb-lite (MOBIDB_LITE);mobidb-lite (MOBIDB_LITE);mobidb-lite (MOBIDB_LITE);mobidb-lite (MOBIDB_LITE);mobidb-lite (MOBIDB_LITE);PTHR13428 (PANTHER);PS50954 (PROSITE_PROFILES);cd12940 (CDD);SSF63451 (SUPERFAMILY)	;
MSTRG.96.2	MAN1 protein	MQSYNDGGNLHIHGKVYAMIRDLLKSSNLLIGDNSSYVTIYVYFLLMKIMIVLMMIGWSGHMSMPQTLSTMTFDDLITTGRHSSDVSNKTSRQYLFNMIPYDDIKSYVIVFVSLPPLLMKDIASLSDSELRDELVKYNVSVGPILGTTRSLYEKKLFKLIKEGSSKGDSAHPQKEKTSPPLKHSSSPSKSPSRGSLTLRTATQSTRRKTARSESEEGSDEEPVVNSTFDKPLTSTPKSADEVASLAPSVPSRQTVRSSERRFHTTTSSSVPRSTPQIVHGYGGDQPGSTPPRKTVLPKTPPRPSTRVTTTTSYTLSQDSDRSGLFNKSNRTAFGTSSVGSRGLLDLGNTIGNDDDDDDGQESSRYIYTTRTAGPERRSPLRKAWDNLLGYDFKAGKVPG…	729	20	0	0.7366	NECAME_04945;OESDEN_23615;OESDEN_23615;HPLM_LOCUS3931;OESDEN_23615;OESDEN_15059;ANCDUO_09608;ANCDUO_09608;OESDEN_23615;OESDEN_15059;NBR_LOCUS20518;OESDEN_15059;OESDEN_15059;OESDEN_15059;HPLM_LOCUS3931;NECAME_04945;Cre-lem-2;FL82_05643;WR25_01642;Cre-lem-2;FL82_05643;Acey_s0176.g557;NECAME_04945;Cre-lem-2;ANCCAN_12738;Cre-lem-2;FL82_05643;Acey_s0176.g557;NBR_LOCUS20518;ANCDUO_09608;Acey_s0176.g557…	GO:0005637-IEA;GO:1902531-IEA;GO:0016020-IEA;GO:0016021-IEA;GO:0006997-IEA;GO:0003676-IEA	nuclear inner membrane-IEA;regulation of intracellular signal transduction-IEA;membrane-IEA;integral component of membrane-IEA;nucleus organization-IEA;nucleic acid binding-IEA	5	GO:0003676;GO:0005637;GO:0006997;GO:0016021;GO:1902531	nucleic acid binding;nuclear inner membrane;nucleus organization;integral component of membrane;regulation of intracellular signal transduction	-	-	IPR011015;IPR003887;IPR012677;IPR041885;IPR003887;IPR011015	HOMOLOGOUS_SUPERFAMILY;DOMAIN;HOMOLOGOUS_SUPERFAMILY;HOMOLOGOUS_SUPERFAMILY;HOMOLOGOUS_SUPERFAMILY;HOMOLOGOUS_SUPERFAMILY;HOMOLOGOUS_SUPERFAMILY;HOMOLOGOUS_SUPERFAMILY;HOMOLOGOUS_SUPERFAMILY;HOMOLOGOUS_SUPERFAMILY;DOMAIN;DOMAIN;HOMOLOGOUS_SUPERFAMILY	LEM/LEM-like domain superfamily;LEM domain;Nucleotide-binding alpha-beta plait domain superfamily;MAN1, winged-helix domain;MAN1, winged-helix domain;MAN1, winged-helix domain;MAN1, winged-helix domain;MAN1, winged-helix domain;MAN1, winged-helix domain;MAN1, winged-helix domain;LEM domain;LEM domain;LEM/LEM-like domain superfamily	G3DSA:1.10.720.40 (GENE3D);PF03020 (PFAM);G3DSA:3.30.70.330 (GENE3D);G3DSA:1.10.10.1180 (GENE3D);mobidb-lite (MOBIDB_LITE);mobidb-lite (MOBIDB_LITE);mobidb-lite (MOBIDB_LITE);mobidb-lite (MOBIDB_LITE);mobidb-lite (MOBIDB_LITE);PTHR13428 (PANTHER);PS50954 (PROSITE_PROFILES);cd12940 (CDD);SSF63451 (SUPERFAMILY)	;
MSTRG.96.3	MAN1 protein	MQSYNDGGNLHIHGKVYAMIRDLLKSSNLLIGDNSSYVTIYVYFLLMKIMIVLMMIGWSGHMSMPQTLSTMTFDDLITTGRHSSDVSNKTSRQYLFNMIPYDDIKSYVIVFVSLPPLLMKDIASLSDSELRDELVKYNVSVGPILGTTRSLYEKKLFKLIKEGSSKGDSAHPQKEKTSPPLKHSSSPSKSPSRGSLTLRTATQSTRRKTARSESEEGSDEEPVVNSTFDKPLTSTPKSADEVASLAPSVPSRQTVRSSERRFHTTTSSSVPRSTPQIVHGYGGDQPGSTPPRKTVLPKTPPRPSTRVTTTTSYTLSQDSDRSGLFNKSNRTAFGTSSVGSRGLLDLGNTIGNDDDDDDGQESSRYIYTTRTAGPERRSPLRKAWDNLLGYDFKAGKVPG…	715	20	0	0.7368	NECAME_04945;OESDEN_23615;OESDEN_23615;HPLM_LOCUS3931;OESDEN_23615;OESDEN_15059;ANCDUO_09608;ANCDUO_09608;OESDEN_23615;OESDEN_15059;NBR_LOCUS20518;OESDEN_15059;OESDEN_15059;OESDEN_15059;HPLM_LOCUS3931;NECAME_04945;Cre-lem-2;FL82_05643;WR25_01642;Cre-lem-2;FL82_05643;Acey_s0176.g557;NECAME_04945;Cre-lem-2;ANCCAN_12738;Cre-lem-2;FL82_05643;Acey_s0176.g557;NBR_LOCUS20518;ANCDUO_09608;Acey_s0176.g557…	GO:0005637-IEA;GO:1902531-IEA;GO:0016020-IEA;GO:0016021-IEA;GO:0006997-IEA;GO:0003676-IEA	nuclear inner membrane-IEA;regulation of intracellular signal transduction-IEA;membrane-IEA;integral component of membrane-IEA;nucleus organization-IEA;nucleic acid binding-IEA	5	GO:0003676;GO:0005637;GO:0006997;GO:0016021;GO:1902531	nucleic acid binding;nuclear inner membrane;nucleus organization;integral component of membrane;regulation of intracellular signal transduction	-	-	IPR011015;IPR003887;IPR012677;IPR041885;IPR003887;IPR011015	HOMOLOGOUS_SUPERFAMILY;DOMAIN;HOMOLOGOUS_SUPERFAMILY;HOMOLOGOUS_SUPERFAMILY;HOMOLOGOUS_SUPERFAMILY;HOMOLOGOUS_SUPERFAMILY;HOMOLOGOUS_SUPERFAMILY;HOMOLOGOUS_SUPERFAMILY;HOMOLOGOUS_SUPERFAMILY;HOMOLOGOUS_SUPERFAMILY;DOMAIN;DOMAIN;HOMOLOGOUS_SUPERFAMILY	LEM/LEM-like domain superfamily;LEM domain;Nucleotide-binding alpha-beta plait domain superfamily;MAN1, winged-helix domain;MAN1, winged-helix domain;MAN1, winged-helix domain;MAN1, winged-helix domain;MAN1, winged-helix domain;MAN1, winged-helix domain;MAN1, winged-helix domain;LEM domain;LEM domain;LEM/LEM-like domain superfamily	G3DSA:1.10.720.40 (GENE3D);PF03020 (PFAM);G3DSA:3.30.70.330 (GENE3D);G3DSA:1.10.10.1180 (GENE3D);mobidb-lite (MOBIDB_LITE);mobidb-lite (MOBIDB_LITE);mobidb-lite (MOBIDB_LITE);mobidb-lite (MOBIDB_LITE);mobidb-lite (MOBIDB_LITE);PTHR13428 (PANTHER);PS50954 (PROSITE_PROFILES);cd12940 (CDD);SSF63451 (SUPERFAMILY)	;
transcript_ACOC_0000011301-mRNA-1	MAN1 protein	MKDIASLSDSELRDELVKYNVSVGPILGTTRSLYEKKLFKLIKEGSSKERLDLGSRGLLDLGNTIGNDDDDDDGQESSRYIYTTRTAGPERRSPLRKAWDNLLGYDFKAGKVPGSQYELRHGSTTTRVDRDPRTGRIRVQQHIFSLFFCNISTILMMTLTVFFVLLAIAYVATTIHTISGAIRDTVHFFYTYAIVPCLIILGVFALYFGHKKWTEMKERDEAAFYDLVDRILDIVRESSENGEEYISIPHVRDVMFPPAKRRGAELARWERAVDFINANESRIATETRVLRGGQECDVWRWIPAKRTGWQGSGRL	315	20	0	0.7817	NECAME_04945;OESDEN_23615;OESDEN_23615;HPLM_LOCUS3931;OESDEN_23615;OESDEN_15059;ANCDUO_09608;ANCDUO_09608;OESDEN_23615;OESDEN_15059;NBR_LOCUS20518;OESDEN_15059;OESDEN_15059;OESDEN_15059;HPLM_LOCUS3931;NECAME_04945;Cre-lem-2;FL82_05643;WR25_01642;Cre-lem-2;FL82_05643;Acey_s0176.g557;NECAME_04945;Cre-lem-2;ANCCAN_12738;Cre-lem-2;FL82_05643;Acey_s0176.g557;NBR_LOCUS20518;ANCDUO_09608;Acey_s0176.g557…	GO:0005637-IEA;GO:1902531-IEA;GO:0016020-IEA;GO:0016021-IEA;GO:0006997-IEA;GO:0003676-IEA	nuclear inner membrane-IEA;regulation of intracellular signal transduction-IEA;membrane-IEA;integral component of membrane-IEA;nucleus organization-IEA;nucleic acid binding-IEA	5	GO:0003676;GO:0005637;GO:0006997;GO:0016021;GO:1902531	nucleic acid binding;nuclear inner membrane;nucleus organization;integral component of membrane;regulation of intracellular signal transduction	-	-	IPR003887;IPR041885;IPR011015;IPR003887;IPR011015	DOMAIN;HOMOLOGOUS_SUPERFAMILY;HOMOLOGOUS_SUPERFAMILY;HOMOLOGOUS_SUPERFAMILY;DOMAIN;DOMAIN;HOMOLOGOUS_SUPERFAMILY	LEM domain;MAN1, winged-helix domain;LEM/LEM-like domain superfamily;LEM/LEM-like domain superfamily;LEM domain;LEM domain;LEM/LEM-like domain superfamily	PF03020 (PFAM);G3DSA:1.10.10.1180 (GENE3D);G3DSA:1.10.720.40 (GENE3D);PTHR13428 (PANTHER);PS50954 (PROSITE_PROFILES);cd12940 (CDD);SSF63451 (SUPERFAMILY)	;
transcript_ACOC_0000011401-mRNA-1	Ion channel	MVDKCLWDCIRFDAVQRFLVNKDLTGGLMLVTYEPDMDFFKAIYFNFVTLTSIGLGDIVPRSESYMLLTMIYIAIGLALTTVAIEIAADTLKKLHYFGRKIENVGNVAIWFGGKKITVKALVKNLGDQFNLPTTVMKDLDLDHFVDQAIKVEEGEIETLRVSFNGAPPFVPDSASFQEIAFVDEPKEEEVSEWPPVPLSEQSARETTPPRSPTPAPQELTPLPCESIPIAEPERELSVEIEPQPNPESQSMIETEPEPKSEHSQEQTSSVKGELWPK	277	20	0	0.8753	FL81_06339;FL81_06339;Acey_s0727.g1876;egl-23;ANCCEY_03286;egl-23;CRE_17734;egl-23;Acey_s0727.g1876;ANCCAN_12621;egl-23;egl-23;egl-23;Cre-egl-23;FL81_06339;Cni-egl-23;egl-23;Cre-egl-23;egl-23;egl-23;Cre-egl-23;egl-23;egl-23;Acey_s0727.g1876;egl-23;egl-23;egl-23;ACOC_LOCUS115;egl-23;egl-23;egl-23;Cre-egl-23;Acey_s0727.g1876;egl-23;egl-23;OESDEN_11597;ACOC_LOCUS115;Acey_s0727.g1876;Cni-egl-23;Cni-e…	GO:0071805-IBA;GO:0071805-IEA;GO:0016020-IEA;GO:0016021-IEA;GO:0030322-IBA;GO:0005267-IEA;GO:0006811-IEA;GO:0005887-IBA;GO:0022841-IBA	potassium ion transmembrane transport-IBA;potassium ion transmembrane transport-IEA;membrane-IEA;integral component of membrane-IEA;stabilization of membrane potential-IBA;potassium channel activity-IEA;ion transport-IEA;integral component of plasma membrane-IBA;potassium ion leak channel activity-IBA	4	GO:0005887;GO:0022841;GO:0030322;GO:0071805	integral component of plasma membrane;potassium ion leak channel activity;stabilization of membrane potential;potassium ion transmembrane transport	-	-	IPR013099	DOMAIN;DOMAIN;DOMAIN;DOMAIN;DOMAIN;DOMAIN	Potassium channel domain;Potassium channel domain;Potassium channel domain;Potassium channel domain;Potassium channel domain;Potassium channel domain	PF07885 (PFAM);G3DSA:1.10.287.70 (GENE3D);mobidb-lite (MOBIDB_LITE);PTHR11003:SF142 (PANTHER);PTHR11003 (PANTHER);SSF81324 (SUPERFAMILY)	;
MSTRG.97.1	Ion channel	MILRNVTHISFVIASLEKLDEVSESEDDEKNSQAILLFILFIIYIVLGGLMLVTYEPDMDFFKAIYFNFVTLTSIGLGDIVPRSESYMLLTMIYIAIGLALTTVAIEIAADTLKKLHYFGRKIENVGNVAIWFGGKKITVKALVKNLGDQFNLPTTVMKDLDLDHFVDQAIKVEEGEIETLRAPPFVPDSASFQEIAFVDEPKEEVWKCNSTPPSLSALPSLPLSPTRSEQTPSLGLPSPPPSEHSTVPTPPTSRTSSIEEVSEWPPVPLSEQSARETTPPRSPTPAPQELTPLPCESIPIAEPERELSVEIEPQPNPESQSMIETEPEPKSEHSQEQTSSVKGELWPK	349	20	1.2e-151	0.8931	FL81_06339;FL81_06339;Acey_s0727.g1876;egl-23;DICVIV_05370;ANCCEY_03286;egl-23;CRE_17734;DICVIV_05370;Acey_s0727.g1876;ANCCAN_12621;egl-23;egl-23;egl-23;Cre-egl-23;FL81_06339;Cni-egl-23;egl-23;Cre-egl-23;egl-23;DICVIV_05370;egl-23;Cre-egl-23;FL82_04839;FL82_04839;egl-23;Acey_s0727.g1876;egl-23;egl-23;FL82_04839;ACOC_LOCUS115;egl-23;FL82_04839;egl-23;DICVIV_05370;egl-23;Cre-egl-23;Acey_s0727.g1876…	GO:0071805-IBA;GO:0071805-IEA;GO:0016020-IEA;GO:0016021-IEA;GO:0030322-IBA;GO:0005267-IEA;GO:0006811-IEA;GO:0005887-IBA;GO:0022841-IBA	potassium ion transmembrane transport-IBA;potassium ion transmembrane transport-IEA;membrane-IEA;integral component of membrane-IEA;stabilization of membrane potential-IBA;potassium channel activity-IEA;ion transport-IEA;integral component of plasma membrane-IBA;potassium ion leak channel activity-IBA	4	GO:0005887;GO:0022841;GO:0030322;GO:0071805	integral component of plasma membrane;potassium ion leak channel activity;stabilization of membrane potential;potassium ion transmembrane transport	-	-	IPR013099	HOMOLOGOUS_SUPERFAMILY;DOMAIN;DOMAIN;DOMAIN;DOMAIN;DOMAIN;DOMAIN	Protein kinase-like domain superfamily;Potassium channel domain;Potassium channel domain;Potassium channel domain;Potassium channel domain;Potassium channel domain;Potassium channel domain	G3DSA:1.10.287.70 (GENE3D);PF07885 (PFAM);mobidb-lite (MOBIDB_LITE);mobidb-lite (MOBIDB_LITE);PTHR11003:SF142 (PANTHER);PTHR11003 (PANTHER);SSF81324 (SUPERFAMILY)	;
MSTRG.98.1	CRE-AMAN-1 protein	MSYHWKPEKRRMDDENVILIACKAWSNEKEVINVHLVPHTHDDLGWIKTVDQYYYGAKSSLVPVGVQYIYNTVINELQKNPERRFSFAETGFLWRWYNDHDDSYKHQLQKLVKSGQVEIIGGGWVQNDEAASHYVDIVDQMTFGLKKLEQLFGECGKPMVAWQIDPFGHSKEQANLFALMGYTSLFFARLHYLEKEDRLKNRSLEFIWNCSEDLKTQIFTGAFYRNDYGPPNGFCFDALCRDDPIMDNPDLEEYNLDEKISSFVTYVKNQSSFLRSSHAMLLMGSDFQYTNADQWYTNLDKLIHYVNRNTSHGVRVFYSTPSCYVKGVLESLSARLLTKADDFFPYASSNHSYWTGYFTSRPTLKGMIREASSLMQLCKQLDALADLGPEDDSDIEIMA…	934	20	0	0.7063	TCNE_LOCUS519;FL83_00617;Cbn-aman-1;ACOC_LOCUS117;L596_020456;Acey_s0015.g2750;WR25_04468;Cbn-aman-1;L596_020456;PRIPAC_40844;aman-1;aman-1;WR25_19322;WR25_04468;GCK72_024310;DICVIV_06990;WR25_04468;FL83_00617;WR25_19322;WR25_19322;PRIPAC_40844;Acey_s0015.g2750;WR25_04468;Acey_s0015.g2750;L596_020456;aman-1;L596_020456;MAN2B1;Acey_s0015.g2750;FL83_00617;Cni-aman-1;MAN2B1;GCK72_024310;ACOC_LOCUS11…	GO:0008152-IEA;GO:0004559-IEA;GO:0003824-IEA;GO:0046872-IEA;GO:0016020-IEA;GO:0016021-IEA;GO:0006013-IEA;GO:0030246-IEA;GO:0005774-IBA;GO:0005975-IEA;GO:0016798-IEA;GO:0016787-IEA	metabolic process-IEA;alpha-mannosidase activity-IEA;catalytic activity-IEA;metal ion binding-IEA;membrane-IEA;integral component of membrane-IEA;mannose metabolic process-IEA;carbohydrate binding-IEA;vacuolar membrane-IBA;carbohydrate metabolic process-IEA;hydrolase activity, acting on glycosyl bonds-IEA;hydrolase activity-IEA	5	GO:0004559;GO:0005774;GO:0006013;GO:0030246;GO:0046872	alpha-mannosidase activity;vacuolar membrane;mannose metabolic process;carbohydrate binding;metal ion binding	EC:3.2.1.24	Alpha-mannosidase	IPR013780;IPR041147;IPR037094;IPR027291;IPR037094;IPR000602;IPR011682;IPR015341;IPR011330;IPR028995;IPR011013	HOMOLOGOUS_SUPERFAMILY;HOMOLOGOUS_SUPERFAMILY;DOMAIN;HOMOLOGOUS_SUPERFAMILY;HOMOLOGOUS_SUPERFAMILY;HOMOLOGOUS_SUPERFAMILY;HOMOLOGOUS_SUPERFAMILY;DOMAIN;DOMAIN;DOMAIN;DOMAIN;DOMAIN;DOMAIN;HOMOLOGOUS_SUPERFAMILY;HOMOLOGOUS_SUPERFAMILY;HOMOLOGOUS_SUPERFAMILY	Glycosyl hydrolase, all-beta;Glycosyl hydrolase, all-beta;Glycosyl hydrolases family 38, C-terminal beta sandwich domain;Glycoside hydrolase family 38, central domain superfamily;Glycoside hydrolase family 38, central domain superfamily;Glycoside hydrolase 38, N-terminal domain superfamily;Glycoside hydrolase family 38, central domain superfamily;Glycoside hydrolase family 38, N-terminal domain;G…	G3DSA:2.60.40.1180 (GENE3D);G3DSA:2.60.40.1360 (GENE3D);PF17677 (PFAM);G3DSA:1.20.1270.50 (GENE3D);G3DSA:2.70.98.30 (GENE3D);G3DSA:3.20.110.10 (GENE3D);G3DSA:1.20.1270.50 (GENE3D);PF01074 (PFAM);PF07748 (PFAM);PF09261 (PFAM);PTHR11607 (PANTHER);PTHR11607:SF3 (PANTHER);cd10810 (CDD);SSF88713 (SUPERFAMILY);SSF88688 (SUPERFAMILY);SSF74650 (SUPERFAMILY)	;mannose metabolic process/alpha-mannosidase activity;mannose metabolic process/alpha-mannosidase activity;mannose metabolic process/alpha-mannosidase activity;mannose metabolic process/alpha-mannosidase activity;mannose metabolic process/alpha-mannosidase activity;catalytic activity/carbohydrate metabolic process;catalytic activity/carbohydrate metabolic process/carbohydrate binding
MSTRG.99.1	CRE-LON-2 protein	MILFYYTLKVNATKCDCRTSDEENKTRDHLRLVIRISALKLLPTVREIIYQSEAEKSYLLLRAKYEILKDLRVNYGNLLAGTNIMPSVDVLIDSIRVMMNDNQSLTLKEMHLLVTKSVSKFHATVLPTAFLCFALGTCRMGSSQYMSCMRNNVQQWTTFLGDDPLNIAKKLADFLHRYKGADNVLQAIHTSLITAENEVTSECARRFNEITVCLKCLTDDTVGYCRNSCLMASFGCLENLAEKWDANVDELYELTRNYKQGFEELIKGVGNSFRRLVGIKQPRLARVIVSRCGPLLLENISDTSYITPKPRKPKEVELNMEKLVEQMRQLRKCWRQIAERMCSAATTEHSFCWNGTSVVRIQLATDDFNIETKDVRPRPKEPWLEESSGYPYDTDDEDY…	500	20	0	0.6489	FL81_02282;lon-2;HPBE_LOCUS19750;lon-2;Acey_s0015.g2752;NBR_LOCUS9394;ANCCAN_12713;DICVIV_06992;HPBE_LOCUS19750;Acey_s0015.g2752;Acey_s0015.g2752;lon-2;lon-2;EVEC_LOCUS8886;lon-2;Cre-lon-2;FL83_00616;ACOC_LOCUS118;Cre-lon-2;EVEC_LOCUS8886;Cre-lon-2;Acey_s0015.g2752;lon-2;Tcan_03515;Cre-lon-2;ANCCEY_01266;Acey_s0015.g2752;FL83_00616;Cre-lon-2;TCNE_LOCUS13396;lon-2;lon-2;FL82_01086;EVEC_LOCUS8886;A…	GO:0016477-IBA;GO:0030334-IEA;GO:0030512-IEA;GO:1905475-IBA;GO:0040015-IEA;GO:0019838-IEA;GO:0062023-IEA;GO:0009986-IBA;GO:0009986-IEA;GO:0042661-IEA;GO:1901048-IEA;GO:0045202-IBA;GO:0005576-IBA;GO:0046658-IEA;GO:0009966-IEA	cell migration-IBA;regulation of cell migration-IEA;negative regulation of transforming growth factor beta receptor signaling pathway-IEA;regulation of protein localization to membrane-IBA;negative regulation of multicellular organism growth-IEA;growth factor binding-IEA;collagen-containing extracellular matrix-IEA;cell surface-IBA;cell surface-IEA;regulation of mesodermal cell fate specification…	3	GO:0009966;GO:0046658;GO:0062023	regulation of signal transduction;anchored component of plasma membrane;collagen-containing extracellular matrix	-	-	IPR001863;IPR001863	FAMILY;FAMILY;FAMILY;FAMILY	Glypican;Glypican;Glypican;Glypican	PF01153 (PFAM);mobidb-lite (MOBIDB_LITE);PTHR10822:SF33 (PANTHER);PTHR10822 (PANTHER)	anchored component of plasma membrane/regulation of signal transduction/collagen-containing extracellular matrix;anchored component of plasma membrane/regulation of signal transduction/collagen-containing extracellular matrix
transcript_ACOC_0000011701-mRNA-1	CRE-LON-2 protein	MTSLQLMEHQSDSTSDSAHIYTQDKVNATKCDCRTSDEENKTRDHLRLVIRISALKLLPTVREIIYQSEAEKSYLLLRAKYEILKDLRVNYGNLLAGTNIMPSVDVLIDSIRVMMNDNQSLTLKEMHLLVTKSVSKFHATVLPTAFLCFALGTCRMGSSQYMSCMRNNVQQWTTFLGDDPLNIAKKLADFLHRYKGADNVLQAIHTSLITAENEVTSECARRFNEITVCLKCLTDDTVGYCRNSCLMASFGCLENLAEKWDANVDELYELTRNYKQGFEEVGIKQPRLARVIVSRCGPLLLENISDTSYITPKPRKPKEVELNMEKLVEQMRQLRKCWRQIAERMCSAATTEHSFCWNGTSVVRIQLATDDFNIETKDVRPRPKEPWLEESSGYPYDTD…	438	20	0	0.6361	FL81_02282;lon-2;HPBE_LOCUS19750;lon-2;lon-2;Acey_s0015.g2752;NBR_LOCUS9394;ANCCAN_12713;DICVIV_06992;HPBE_LOCUS19750;Acey_s0015.g2752;Acey_s0015.g2752;lon-2;lon-2;lon-2;EVEC_LOCUS8886;lon-2;Cre-lon-2;FL83_00616;ACOC_LOCUS118;Cre-lon-2;lon-2;EVEC_LOCUS8886;Cre-lon-2;Acey_s0015.g2752;lon-2;lon-2;lon-2;Tcan_03515;Cre-lon-2;ANCCEY_01266;Acey_s0015.g2752;FL83_00616;Cre-lon-2;TCNE_LOCUS13396;lon-2;lon…	GO:0016477-IBA;GO:0030334-IGI;GO:0030334-IEA;GO:0030512-IGI;GO:0030512-IMP;GO:0030512-IEA;GO:1905475-IBA;GO:0040015-IMP;GO:0040015-IEA;GO:0019838-IPI;GO:0019838-IEA;GO:0062023-IEA;GO:0009986-IDA;GO:0009986-IBA;GO:0009986-IEA;GO:0042661-IGI;GO:0042661-IEA;GO:1901048-IGI;GO:1901048-IEA;GO:0045202-IBA;GO:0005576-IBA;GO:0046658-IEA;GO:0009966-IEA	cell migration-IBA;regulation of cell migration-IGI;regulation of cell migration-IEA;negative regulation of transforming growth factor beta receptor signaling pathway-IGI;negative regulation of transforming growth factor beta receptor signaling pathway-IMP;negative regulation of transforming growth factor beta receptor signaling pathway-IEA;regulation of protein localization to membrane-IBA;negat…	5	GO:0009966;GO:0046658;GO:0050793;GO:0051239;GO:0062023	regulation of signal transduction;anchored component of plasma membrane;regulation of developmental process;regulation of multicellular organismal process;collagen-containing extracellular matrix	-	-	IPR001863;IPR001863	FAMILY;FAMILY;FAMILY;FAMILY	Glypican;Glypican;Glypican;Glypican	PF01153 (PFAM);mobidb-lite (MOBIDB_LITE);PTHR10822:SF33 (PANTHER);PTHR10822 (PANTHER)	anchored component of plasma membrane/regulation of signal transduction/collagen-containing extracellular matrix;anchored component of plasma membrane/regulation of signal transduction/collagen-containing extracellular matrix
MSTRG.100.1	unnamed protein product	MMNRDGLLTNGERSVGDIGRKWTLLDIPQSTVLPAREAQNFSSRRCFGDHPTSFDSMDEPFLPPLTPLDQYMETEGKLAASIRWLILRVYGQEKDIPDKLRLSGFRDERGHLQLDIAILTGLTNGSLYCQAAAKIFKEPHLVTQSHGAVIAALTDYGVDVVQCSNGKSANVTEAELFTADSFQMAAHLAMMDALMLAHLRNVITVDRVIDAVSRHTTVDESERPMDSVDALLFWINKVCLLVRDDVERSQIQLKGGAEGGMIPEMEDLYDEISDGQCLCALVAWYRPREMDLEEVCYNDQMSTADCHYNLFLLQRFCHNNLPWNPFHFEIEDILYLRDSLQMNINAFLSDLFDIFEPAPTVVVQPEPMTSPRRFVPIQPIPDLRAGKSVARTPQSRSVR…	1219	20	0	0.7419	SVUK_LOCUS10233;FL82_15324;DICVIV_11126;ANCDUO_10713;ACOC_LOCUS120;NBR_LOCUS12483;WR25_13520;WR25_09665;Acey_s0515.g2788;Acey_s0515.g2788;ANCDUO_10713;WR25_13520;WR25_09665;Acey_s0515.g2788;DICVIV_11126;WR25_09665;WR25_09665;OESDEN_08621;FL82_15324;Acey_s0515.g2788;CAEBREN_09933;ANCDUO_10713;ANCCAN_12820;Acey_s0515.g2788;NBR_LOCUS12483;WR25_09665;FL81_01273;OESDEN_08621;ANCCAN_12820;NBR_LOCUS1248…	GO:0005516-IEA;GO:0002119-IEA;GO:0051011-IEA;GO:0008017-IEA;GO:0031122-IEA;GO:0005874-IEA;GO:0036449-IEA	calmodulin binding-IEA;nematode larval development-IEA;microtubule minus-end binding-IEA;microtubule binding-IEA;cytoplasmic microtubule organization-IEA;microtubule-IEA;microtubule minus-end-IEA	3	GO:0005516;GO:0005874;GO:0008017	calmodulin binding;microtubule;microtubule binding	-	-	IPR022613;IPR038209;IPR014797;IPR036872;IPR032940;IPR014797;IPR001715;IPR011033;IPR036872	DOMAIN;HOMOLOGOUS_SUPERFAMILY;DOMAIN;HOMOLOGOUS_SUPERFAMILY;HOMOLOGOUS_SUPERFAMILY;HOMOLOGOUS_SUPERFAMILY;HOMOLOGOUS_SUPERFAMILY;HOMOLOGOUS_SUPERFAMILY;HOMOLOGOUS_SUPERFAMILY;FAMILY;FAMILY;DOMAIN;DOMAIN;HOMOLOGOUS_SUPERFAMILY;HOMOLOGOUS_SUPERFAMILY	Calmodulin-regulated spectrin-associated protein, CH domain;CKK domain superfamily;CKK domain;CH domain superfamily;CH domain superfamily;CH domain superfamily;CH domain superfamily;CH domain superfamily;CH domain superfamily;Calmodulin-regulated spectrin-associated protein;Calmodulin-regulated spectrin-associated protein;CKK domain;Calponin homology domain;PRC-barrel-like superfamily;CH domain s…	PF11971 (PFAM);G3DSA:3.10.20.360 (GENE3D);PF08683 (PFAM);G3DSA:1.10.418.10 (GENE3D);mobidb-lite (MOBIDB_LITE);mobidb-lite (MOBIDB_LITE);mobidb-lite (MOBIDB_LITE);mobidb-lite (MOBIDB_LITE);mobidb-lite (MOBIDB_LITE);PTHR21595 (PANTHER);PTHR21595:SF0 (PANTHER);PS51508 (PROSITE_PROFILES);PS50021 (PROSITE_PROFILES);SSF50346 (SUPERFAMILY);SSF47576 (SUPERFAMILY)	;microtubule binding;microtubule binding/calmodulin binding;microtubule binding;protein binding;
transcript_ACOC_0000012001-mRNA-1	Kunitz/Bovine pancreatic trypsin inhibitor domain protein	MLETEQLNNCVTIPLVCSTLDWNKIANGVLGFTRTITEIRVYGLQTTQVHLIYTRYSANFEFVLDFNCQIAEDETKFLKFSTQTRLLSQSMVVGFADTIQLERLTPDQTLWSQRSCYLTSFDKFYYQQPYAQQRTMMYPVRTNCQYVWCNQNRYRWNYRPIGNISR	166	10	4.6e-121	0.8557	WR25_03177;SVUK_LOCUS10200;WR25_03177;ANCCEY_01205;HPLM_LOCUS3038;ANCCAN_12819;WR25_03177;HPBE_LOCUS8743;WR25_03177;ANCCAN_12819;HPLM_LOCUS3038;ANCCEY_01205;SVUK_LOCUS10200;HPBE_LOCUS8743	GO:0004867-IEA;GO:0010951-IEA	serine-type endopeptidase inhibitor activity-IEA;negative regulation of endopeptidase activity-IEA	2	GO:0004867;GO:0010951	serine-type endopeptidase inhibitor activity;negative regulation of endopeptidase activity	-	-	-	-	-	-	-
transcript_ACOC_0000012101-mRNA-1	Proteinase inhibitor I2 domain containing protein	MLFHVTTLPTPPPEILTNSTKPPTLSESTTKIPFTTMFLSSERKQTKKKFFNPCLSGRPLMNEFEMPISCNYLNQPNGGCPEDYWCHIGASFATTSCCPKTDTLDRCGMQRATGEGDELVARWYYDHRVKQCRRFLYKGIRGNMNNFVTKTQCIDACEISTAVDGKNPCRFGHPAKHQQNRSLVMCGPNNTSLCPQNHFCHLGETPETTVCCESSGSTDPCLLPLNVGEGKALLKRFYYNTFTKRCSEFIYRGIKGNENNFVTNRQCEDVCQRWNNPCPTEMNNLLKKECSLLGTECSEDQWCHIGPSQATTVCCPGGVTEPCSLPLKTGEGDFELPRWYADPNEKSCSRQCKPFMYKGAKGNQNNFLTKTACEKKCQRKCKSPCGTGTMLMTPTNEPR…	908	20	0	0.7895	ACOC_LOCUS122;FL82_00480;Acey_s0515.g2789;Acey_s0515.g2789;Acey_s0515.g2789;Acey_s0515.g2789;HPLM_LOCUS3038;FL81_01723;GCK72_023735;CBG17404;FL83_01166;GCK72_023735;CAEBREN_15350;FL81_01723;Acey_s0515.g2789;C34F6.1;DICVIV_11124;NBR_LOCUS12484;Cni-C34F6.1;CRE_07476;NBR_LOCUS12484;Acey_s0515.g2789;CRE_07476;FL82_00480;Cni-C34F6.1;CBG17404;DICVIV_11124;C34F6.1;FL83_01166;HPLM_LOCUS3038;Acey_s0515.g2…	GO:0004867-IEA;GO:0010951-IEA	serine-type endopeptidase inhibitor activity-IEA;negative regulation of endopeptidase activity-IEA	2	GO:0004867;GO:0010951	serine-type endopeptidase inhibitor activity;negative regulation of endopeptidase activity	-	-	IPR002223;IPR036880;IPR028150;IPR036880;IPR036880;IPR036880;IPR002223;IPR036880;IPR002223;IPR002223;IPR002223;IPR002223;IPR002223;IPR002223;IPR002223;IPR002223;IPR002223;IPR002223;IPR002223;IPR002223;IPR002223;IPR002223;IPR002223;IPR036880;IPR036880;IPR036880;IPR036880;IPR036880;IPR036880;IPR036880;IPR036880	DOMAIN;HOMOLOGOUS_SUPERFAMILY;REPEAT;HOMOLOGOUS_SUPERFAMILY;HOMOLOGOUS_SUPERFAMILY;HOMOLOGOUS_SUPERFAMILY;DOMAIN;HOMOLOGOUS_SUPERFAMILY;HOMOLOGOUS_SUPERFAMILY;HOMOLOGOUS_SUPERFAMILY;HOMOLOGOUS_SUPERFAMILY;HOMOLOGOUS_SUPERFAMILY;HOMOLOGOUS_SUPERFAMILY;DOMAIN;DOMAIN;DOMAIN;DOMAIN;DOMAIN;DOMAIN;DOMAIN;DOMAIN;DOMAIN;DOMAIN;DOMAIN;DOMAIN;DOMAIN;DOMAIN;DOMAIN;HOMOLOGOUS_SUPERFAMILY;HOMOLOGOUS_SUPERFAMI…	Pancreatic trypsin inhibitor Kunitz domain;Pancreatic trypsin inhibitor Kunitz domain superfamily;Lustrin, cysteine-rich repeated;Pancreatic trypsin inhibitor Kunitz domain superfamily;Pancreatic trypsin inhibitor Kunitz domain superfamily;Pancreatic trypsin inhibitor Kunitz domain superfamily;Pancreatic trypsin inhibitor Kunitz domain;Pancreatic trypsin inhibitor Kunitz domain superfamily;Pancre…	PR00759 (PRINTS);G3DSA:4.10.410.10 (GENE3D);PF14625 (PFAM);G3DSA:4.10.410.10 (GENE3D);G3DSA:4.10.410.10 (GENE3D);G3DSA:4.10.410.10 (GENE3D);PF00014 (PFAM);G3DSA:4.10.410.10 (GENE3D);PTHR46339:SF2 (PANTHER);PTHR46339 (PANTHER);PTHR46339 (PANTHER);PTHR46339:SF2 (PANTHER);PTHR46339 (PANTHER);PS50279 (PROSITE_PROFILES);PS50279 (PROSITE_PROFILES);PS50279 (PROSITE_PROFILES);PS50279 (PROSITE_PROFILES);P…	serine-type endopeptidase inhibitor activity;serine-type endopeptidase inhibitor activity;serine-type endopeptidase inhibitor activity;serine-type endopeptidase inhibitor activity;serine-type endopeptidase inhibitor activity;serine-type endopeptidase inhibitor activity;serine-type endopeptidase inhibitor activity;serine-type endopeptidase inhibitor activity;serine-type endopeptidase inhibitor act…
MSTRG.101.2	Proteinase inhibitor I2 domain containing protein	MPISCNYLNQPNGGCPEDYWCHIGASFATTSCCPKTDTLDRCGMQRATGEGDELVARWYYDHRVKQCRRFLYKGIRGNMNNFVTKTQCIDACEISTDPCLLPLNVGEGKALLKRFYYNTFTKRCSEFIYRGIKGNENNFVTNRQCEDVCQRWNNPCPTEMNNLLKKECSLLGTECSEDQWCHIGPSQATTVCCPGGVTEPCSLPLKTGEGDFELPRWYADPNEKSCSRQCKPFMYKGAKGNQNNFLTKTACEKKCQRKCKSPCGTGTMLMTPTNEPRFCSPTSPCPQTHWCHVGITAETTVCCSTVLNTCELPMMKGHGNSFLTRWHFDNNQKKCVKFIYSGEGGNQNMFLTQEDCHTICPVFQNPCGSGKPLLIMGMPKVCSPSQRCPSTHFCHIGVD…	785	20	0	0.8152	ACOC_LOCUS122;FL82_00480;Acey_s0515.g2789;Acey_s0515.g2789;Acey_s0515.g2789;Acey_s0515.g2789;HPLM_LOCUS3038;FL81_01723;GCK72_023735;CBG17404;FL83_01166;GCK72_023735;CAEBREN_15350;FL81_01723;Acey_s0515.g2789;C34F6.1;DICVIV_11124;NBR_LOCUS12484;Cni-C34F6.1;CRE_07476;NBR_LOCUS12484;Acey_s0515.g2789;CRE_07476;FL82_00480;Cni-C34F6.1;CBG17404;DICVIV_11124;C34F6.1;FL83_01166;HPLM_LOCUS3038;Acey_s0515.g2…	GO:0004867-IEA;GO:0010951-IEA	serine-type endopeptidase inhibitor activity-IEA;negative regulation of endopeptidase activity-IEA	2	GO:0004867;GO:0010951	serine-type endopeptidase inhibitor activity;negative regulation of endopeptidase activity	-	-	IPR002223;IPR036880;IPR002223;IPR036880;IPR036880;IPR036880;IPR028150;IPR036880;IPR002223;IPR002223;IPR002223;IPR002223;IPR002223;IPR002223;IPR002223;IPR002223;IPR002223;IPR002223;IPR002223;IPR002223;IPR002223;IPR002223;IPR002223;IPR002223;IPR036880;IPR036880;IPR036880;IPR036880;IPR036880;IPR036880;IPR036880;IPR036880	DOMAIN;HOMOLOGOUS_SUPERFAMILY;DOMAIN;HOMOLOGOUS_SUPERFAMILY;HOMOLOGOUS_SUPERFAMILY;HOMOLOGOUS_SUPERFAMILY;REPEAT;HOMOLOGOUS_SUPERFAMILY;HOMOLOGOUS_SUPERFAMILY;HOMOLOGOUS_SUPERFAMILY;DOMAIN;DOMAIN;DOMAIN;DOMAIN;DOMAIN;DOMAIN;DOMAIN;DOMAIN;DOMAIN;DOMAIN;DOMAIN;DOMAIN;DOMAIN;DOMAIN;DOMAIN;DOMAIN;HOMOLOGOUS_SUPERFAMILY;HOMOLOGOUS_SUPERFAMILY;HOMOLOGOUS_SUPERFAMILY;HOMOLOGOUS_SUPERFAMILY;HOMOLOGOUS_SU…	Pancreatic trypsin inhibitor Kunitz domain;Pancreatic trypsin inhibitor Kunitz domain superfamily;Pancreatic trypsin inhibitor Kunitz domain;Pancreatic trypsin inhibitor Kunitz domain superfamily;Pancreatic trypsin inhibitor Kunitz domain superfamily;Pancreatic trypsin inhibitor Kunitz domain superfamily;Lustrin, cysteine-rich repeated;Pancreatic trypsin inhibitor Kunitz domain superfamily;Pancre…	PR00759 (PRINTS);G3DSA:4.10.410.10 (GENE3D);PF00014 (PFAM);G3DSA:4.10.410.10 (GENE3D);G3DSA:4.10.410.10 (GENE3D);G3DSA:4.10.410.10 (GENE3D);PF14625 (PFAM);G3DSA:4.10.410.10 (GENE3D);PTHR46339 (PANTHER);PTHR46339:SF2 (PANTHER);PS50279 (PROSITE_PROFILES);PS50279 (PROSITE_PROFILES);PS50279 (PROSITE_PROFILES);PS50279 (PROSITE_PROFILES);PS50279 (PROSITE_PROFILES);PS50279 (PROSITE_PROFILES);PS50279 (PR…	serine-type endopeptidase inhibitor activity;serine-type endopeptidase inhibitor activity;serine-type endopeptidase inhibitor activity;serine-type endopeptidase inhibitor activity;serine-type endopeptidase inhibitor activity;serine-type endopeptidase inhibitor activity;serine-type endopeptidase inhibitor activity;serine-type endopeptidase inhibitor activity;serine-type endopeptidase inhibitor act…
MSTRG.102.1	heparan sulfate 2-O-sulfotransferase	MSPSRTHEQQRNAQKTTSTDVGPRSNLIVIYNRIPKTGSTTVTNAVAYDLYKVNGFNVIHLNMTKNRQVMSLTDQSEFIANITSWSERKPAFYHGHVAFVDFGRFGIQNPIYINIVREPLERLLSHYYFLRFGDNFRVGLKRSRAGNNETFDECVSRNGHDCDVKQMWLQIPYFCGHHHFCTVAGSKAALDQAKKNLIDKYLIVGISEQIRDFIALLDRLVPRFFKGALMHFDNLSESRAHLRNTKQKYPPNDHTLSMIRRTEVYQLEKEFYEFAKEEFKAIFKKATNGTNNALDVLRLRLQFHYEKVKPERPMFDLKRS	320	20	0	0.8958	NECAME_01563;ACOC_LOCUS123;hst-2;hst-2;OESDEN_13697;hst-2;ANCCAN_08275;DICVIV_11123;Cre-hst-2;Cni-hst-2;hst-2;hst-2;Cbn-hst-2;Cbn-hst-2;OESDEN_13697;DICVIV_11123;ANCDUO_16488;Acey_s0346.g3133;Cre-hst-2;Cbn-hst-2;hst-2;hst-2;hst-2;Cre-hst-2;OESDEN_10477;hst-2;Cre-hst-2;HPLM_LOCUS3037;NBR_LOCUS12485;hst-2;Cbn-hst-2;SVUK_LOCUS10201;ANCCAN_08275;Cbn-hst-2;hst-2;hst-2;SVUK_LOCUS10201;Cre-hst-2;Cbn-hst…	GO:0016020-IEA;GO:0016021-IEA;GO:0016740-IEA;GO:0030334-IMP;GO:0030334-IEA;GO:0015015-IDA;GO:0015015-IBA;GO:0015015-IGI;GO:0015015-IMP;GO:0015015-IEA;GO:0015014-IBA;GO:0007275-IEA;GO:0004394-IDA;GO:0004394-IBA;GO:0004394-IMP;GO:0004394-IEA;GO:1902667-IMP;GO:1902667-IEA;GO:0008146-IBA;GO:0008146-IEA;GO:0005794-ISS;GO:0005794-IEA;GO:0000139-IEA;GO:0040018-IGI;GO:0040018-IMP;GO:0040018-IEA	membrane-IEA;integral component of membrane-IEA;transferase activity-IEA;regulation of cell migration-IMP;regulation of cell migration-IEA;heparan sulfate proteoglycan biosynthetic process, enzymatic modification-IDA;heparan sulfate proteoglycan biosynthetic process, enzymatic modification-IBA;heparan sulfate proteoglycan biosynthetic process, enzymatic modification-IGI;heparan sulfate proteoglyc…	8	GO:0000139;GO:0004394;GO:0015014;GO:0015015;GO:0016021;GO:0030334;GO:0040018;GO:1902667	Golgi membrane;heparan sulfate 2-O-sulfotransferase activity;heparan sulfate proteoglycan biosynthetic process, polysaccharide chain biosynthetic process;heparan sulfate proteoglycan biosynthetic process, enzymatic modification;integral component of membrane;regulation of cell migration;positive regulation of multicellular organism growth;regulation of axon guidance	-	-	IPR005331;IPR007734;IPR027417	FAMILY;FAMILY;FAMILY;FAMILY;FAMILY;HOMOLOGOUS_SUPERFAMILY	Glypican;Sulfotransferase;Sulfotransferase;Heparan sulphate 2-O-sulfotransferase;Heparan sulphate 2-O-sulfotransferase;P-loop containing nucleoside triphosphate hydrolase	G3DSA:3.40.50.300 (GENE3D);PF03567 (PFAM);mobidb-lite (MOBIDB_LITE);PTHR12129 (PANTHER);PTHR12129:SF17 (PANTHER);SSF52540 (SUPERFAMILY)	;integral component of membrane/sulfotransferase activity;integral component of membrane/sulfotransferase activity;
transcript_ACOC_0000012201-mRNA-1	heparan sulfate 2-O-sulfotransferase	MSPSRTQLLFANLCTIGLVILYVNVRLNSEQQRNAQKTTSTDVGPRSNLIVIYNRIPKTGSTTVTNAVAYDLYKVNGFNVIHLNMTKNRQVMSLTDQSEFIANITSWSERKPAFYHGHVAFVDFGRFGIQNPIYINIVREPLERLLSHYYFLRFGDNFRVGLKRSRAGNNETFDECVSRNGHDCDVKQIVAGSKAALDQAKKNLIDKYLIVGISEQIRDFIALLDRLVPRFFKGALMHFDNLSESRAHLRNTKQKYPPNDHTLSMIRRTEVYQLEKEFYEFAKEEFKAIFKKATNGTNNALDVLRLRLQFHYEKVKPERPMFDLKRS	327	20	0	0.8349	NECAME_01563;ACOC_LOCUS123;hst-2;hst-2;OESDEN_13697;hst-2;ANCCAN_08275;DICVIV_11123;Cre-hst-2;Cni-hst-2;hst-2;hst-2;Cbn-hst-2;Cbn-hst-2;OESDEN_13697;DICVIV_11123;ANCDUO_16488;Acey_s0346.g3133;Cre-hst-2;Cbn-hst-2;hst-2;hst-2;hst-2;Cre-hst-2;OESDEN_10477;hst-2;Cre-hst-2;HPLM_LOCUS3037;NBR_LOCUS12485;hst-2;Cbn-hst-2;SVUK_LOCUS10201;ANCCAN_08275;Cbn-hst-2;hst-2;hst-2;SVUK_LOCUS10201;Cre-hst-2;Cbn-hst…	GO:0016020-IEA;GO:0016021-IEA;GO:0016740-IEA;GO:0030334-IMP;GO:0030334-IEA;GO:0015015-IDA;GO:0015015-IBA;GO:0015015-IGI;GO:0015015-IMP;GO:0015015-IEA;GO:0015014-IBA;GO:0007275-IEA;GO:0004394-IDA;GO:0004394-IBA;GO:0004394-IMP;GO:0004394-IEA;GO:1902667-IMP;GO:1902667-IEA;GO:0008146-IBA;GO:0008146-IEA;GO:0005794-ISS;GO:0005794-IEA;GO:0000139-IEA;GO:0040018-IGI;GO:0040018-IMP;GO:0040018-IEA	membrane-IEA;integral component of membrane-IEA;transferase activity-IEA;regulation of cell migration-IMP;regulation of cell migration-IEA;heparan sulfate proteoglycan biosynthetic process, enzymatic modification-IDA;heparan sulfate proteoglycan biosynthetic process, enzymatic modification-IBA;heparan sulfate proteoglycan biosynthetic process, enzymatic modification-IGI;heparan sulfate proteoglyc…	8	GO:0000139;GO:0004394;GO:0015014;GO:0015015;GO:0016021;GO:0030334;GO:0040018;GO:1902667	Golgi membrane;heparan sulfate 2-O-sulfotransferase activity;heparan sulfate proteoglycan biosynthetic process, polysaccharide chain biosynthetic process;heparan sulfate proteoglycan biosynthetic process, enzymatic modification;integral component of membrane;regulation of cell migration;positive regulation of multicellular organism growth;regulation of axon guidance	-	-	IPR005331;IPR007734;IPR027417	FAMILY;FAMILY;FAMILY;FAMILY;HOMOLOGOUS_SUPERFAMILY	Sulfotransferase;Sulfotransferase;Heparan sulphate 2-O-sulfotransferase;Heparan sulphate 2-O-sulfotransferase;P-loop containing nucleoside triphosphate hydrolase	PF03567 (PFAM);G3DSA:3.40.50.300 (GENE3D);PTHR12129 (PANTHER);PTHR12129:SF17 (PANTHER);SSF52540 (SUPERFAMILY)	integral component of membrane/sulfotransferase activity;integral component of membrane/sulfotransferase activity;
transcript_ACOC_0000012301-mRNA-1	isocitrate dehydrogenase, NADP-dependent	MWNVRRFLTSSRSIASAVFSSRPKIKVANPVVELDGDEMTRIIWAEIKKKLILPYLDIDIQYFDLGLPNRDETNDEVTRVAAEAIKKYNVGIKCATITPDEARVKEFKLKKMWLSPNGTIRNILGGTVFREPILCKNIPRLVPGWKKPIVIGRHAFGDQYKATDVVIPQGSTLQLVIKGPDGKENVRNVFTFDKSSGIGMAMYNTDESIRGFAHSCFQYALMKKWPLYLSTKNTILKQYDGRFKGIFQEIYSTTYESDFKTAGIFYEHRLIDDQVAQCLKSAGGFVWACKNYDGDVQSDIVAQGYGSLGLMASVLVCPDGKTIEAEAAHGTVTRHYREHQKGNPTSTNPVASIFAWTRGLHHRGVLDQNEMLKRFSLTLEKACIETIEEGRMTKDLSIC…	431	20	0	0.9062	ANCCAN_12817;FL83_01159;ANCCEY_01206;idh-2;NBR_LOCUS12486;CRE_07290;FL83_01159;Cni-idh-2;ACOC_LOCUS124;HPLM_LOCUS3036;Acey_s0545.g3246;HPLM_LOCUS3036;NECAME_01564;WR25_23419;idh-2;NBR_LOCUS12486;ACOC_LOCUS124;idh-2;GCK72_023743;ANCCEY_01206;ACOC_LOCUS124;idh-2;NECAME_01564;NECAME_01564;ANCCAN_12817;PRIPAC_30184;CRE_07290;ACOC_LOCUS124;PRIPAC_30184;Acey_s0545.g3246;NBR_LOCUS12486;WR25_23419;idh-2;…	GO:0000287-IEA;GO:0016491-IEA;GO:0046872-IEA;GO:0051287-IEA;GO:0005739-IBA;GO:0016020-IEA;GO:0006739-IBA;GO:0016021-IEA;GO:0055114-IEA;GO:0016616-IEA;GO:0006099-IEA;GO:0006102-IBA;GO:0006102-IEA;GO:0004450-IBA;GO:0004450-IEA	magnesium ion binding-IEA;oxidoreductase activity-IEA;metal ion binding-IEA;NAD binding-IEA;mitochondrion-IBA;membrane-IEA;NADP metabolic process-IBA;integral component of membrane-IEA;oxidation-reduction process-IEA;oxidoreductase activity, acting on the CH-OH group of donors, NAD or NADP as acceptor-IEA;tricarboxylic acid cycle-IEA;isocitrate metabolic process-IBA;isocitrate metabolic process-I…	8	GO:0000287;GO:0004450;GO:0005739;GO:0006099;GO:0006102;GO:0006739;GO:0016021;GO:0051287	magnesium ion binding;isocitrate dehydrogenase (NADP+) activity;mitochondrion;tricarboxylic acid cycle;isocitrate metabolic process;NADP metabolic process;integral component of membrane;NAD binding	EC:1.1.1.42	Isocitrate dehydrogenase (NADP(+))	IPR004790;IPR024084;IPR004790;IPR004790	FAMILY;DOMAIN;DOMAIN;FAMILY;FAMILY;FAMILY;FAMILY	Isocitrate dehydrogenase NADP-dependent;Isopropylmalate dehydrogenase-like domain;Isopropylmalate dehydrogenase-like domain;Isocitrate dehydrogenase NADP-dependent;Isocitrate dehydrogenase NADP-dependent;Isocitrate dehydrogenase NADP-dependent;Isocitrate dehydrogenase NADP-dependent	PIRSF000108 (PIRSF);PF00180 (PFAM);G3DSA:3.40.718.10 (GENE3D);TIGR00127 (TIGRFAM);PTHR11822:SF11 (PANTHER);PTHR11822 (PANTHER);SSF53659 (SUPERFAMILY)	oxidation-reduction process/isocitrate dehydrogenase (NADP+) activity/isocitrate metabolic process;oxidation-reduction process/oxidoreductase activity, acting on the CH-OH group of donors, NAD or NADP as acceptor;oxidation-reduction process/isocitrate dehydrogenase (NADP+) activity/isocitrate metabolic process;oxidation-reduction process/isocitrate dehydrogenase (NADP+) activity/isocitrate metabo…
MSTRG.104.1	ubiquitinyl hydrolase 1	MNVSFLLCEKILSSKVVFSSDTVFQFGPSYLSHQRLDYVYDGVGRGDRIGEQIGIPTFVCGEIGASIKNQRLLVNGYSVNKLLTKMPLGGSSTMTHRKRKKEFDRCFDMVGSTSKKSTEQDDHIGSFKDATENVIIKKRHQSELESSSDVLTEDCKKPLLKSSPAEECAAVVLPVGTPANEETFTRSKSKKTSDRKRTLSENARKEMSDPVCPYDMSGVWTFEGFQHTRDIPHGAGLVNKRNICFANSVLQSLVHIPPFTRYTLEKHIHSNGEQEKKCVWCMMRRAHYSKIFNYKKPYLAKWVVELWPSLFSKKYRGSQEDAHEFFLKLADALKLIEENSPSNETSPPSPIDIIFGGKTRYETTCAACGDKTVRYQKFLDLSLPLPETWKKRRAPNTTD…	802	20	0	0.5284	Usp36;HPLM_LOCUS3034;Usp36;ANCCAN_12816;WR25_23420;ANCDUO_05189;NAV_LOCUS4869;ANCCAN_12816;Acey_s0282.g1266;HPLM_LOCUS3034;DICVIV_11121;Acey_s0282.g1266;WR25_23420;WR25_20969;ACOC_LOCUS125;SVUK_LOCUS10071;WR25_20969;Usp36;SVUK_LOCUS10071;Usp36;HPBE_LOCUS16858;NAV_LOCUS4869;NBR_LOCUS19553;Acey_s0282.g1266;Acey_s0282.g1266;ANCDUO_05189;ANCDUO_05189;NAV_LOCUS4869;NBR_LOCUS19553;SRAE_2000358500;DICVI…	GO:0008233-IEA;GO:0006508-IEA;GO:0016020-IEA;GO:0016021-IEA;GO:0008234-IEA;GO:0016787-IEA;GO:0036459-IEA;GO:0006511-IEA;GO:0016579-IEA	peptidase activity-IEA;proteolysis-IEA;membrane-IEA;integral component of membrane-IEA;cysteine-type peptidase activity-IEA;hydrolase activity-IEA;thiol-dependent ubiquitin-specific protease activity-IEA;ubiquitin-dependent protein catabolic process-IEA;protein deubiquitination-IEA	2	GO:0016579;GO:0036459	protein deubiquitination;thiol-dependent ubiquitin-specific protease activity	EC:3.4.19;EC:3.4.19.12	Acting on peptide bonds (peptidases);Ubiquitinyl hydrolase 1	IPR001394;IPR028889;IPR038765	DOMAIN;DOMAIN;DOMAIN;DOMAIN;DOMAIN;DOMAIN;DOMAIN;DOMAIN;DOMAIN;DOMAIN;DOMAIN;HOMOLOGOUS_SUPERFAMILY	Peptidase C19, ubiquitin carboxyl-terminal hydrolase;Peptidase C19, ubiquitin carboxyl-terminal hydrolase;Peptidase C19, ubiquitin carboxyl-terminal hydrolase;Peptidase C19, ubiquitin carboxyl-terminal hydrolase;Peptidase C19, ubiquitin carboxyl-terminal hydrolase;Peptidase C19, ubiquitin carboxyl-terminal hydrolase;Peptidase C19, ubiquitin carboxyl-terminal hydrolase;Peptidase C19, ubiquitin car…	PF00443 (PFAM);G3DSA:3.90.70.10 (GENE3D);mobidb-lite (MOBIDB_LITE);mobidb-lite (MOBIDB_LITE);mobidb-lite (MOBIDB_LITE);mobidb-lite (MOBIDB_LITE);mobidb-lite (MOBIDB_LITE);mobidb-lite (MOBIDB_LITE);PTHR21646:SF23 (PANTHER);PTHR21646 (PANTHER);PS50235 (PROSITE_PROFILES);SSF54001 (SUPERFAMILY)	thiol-dependent ubiquitin-specific protease activity/protein deubiquitination;
transcript_ACOC_0000012501-mRNA-1	protein tyrosine kinase	MLGESCFPQVRVGIRTSDLRQRSKIKDDVLYAKQSKISQDGTNFSLSSQISSLSRSPSDTQKRNDLHIPLHKRMAKKIRVTLSFVADWFFLTEIHFNSDDKIYAHTIFAQPSITKHQIEEEYGGDSLERPSLHAANKNDDIHQYDSVAVREQINKLLGLCADVCEGMRHLESLGIVHGHLTPNNIVLDENLRAKVTSPRGLAHYAQLRYSSPESILQNSFSSRSDVWAFAVCCWEIADTSCKKIPFASLSNSEIIENAEKIMNGHNDAIVLTFKDFIPRGIRNVLLRCFDAEPQARPLFAHISCLMSKYYVTIDE	315	20	0	0.8089	Acey_s0064.g3519;OESDEN_00476;Acey_s0064.g3519;OESDEN_00476;Acey_s0064.g3519;WR25_09560;NECAME_06546;ACOC_LOCUS126;Acey_s0064.g3519;Acey_s0064.g3519;ANCCAN_19164;WR25_09560;ANCCAN_19164;OESDEN_00476;ANCDUO_12031;WR25_09560;Acey_s0064.g3519;WR25_09560;DICVIV_11120;ANCCAN_18892;WR25_09560;DICVIV_11120;ANCCAN_18892;WR25_09560;Acey_s0064.g3519;ANCCAN_18892;WR25_09560;DICVIV_11120;Acey_s0064.g3519;WR2…	GO:0016020-IEA;GO:0016021-IEA;GO:0038063-IEA;GO:0038062-IEA;GO:0016310-IEA;GO:0004672-IEA;GO:0016301-IEA;GO:0005524-IEA;GO:0005887-IEA;GO:0006468-IEA	membrane-IEA;integral component of membrane-IEA;collagen-activated tyrosine kinase receptor signaling pathway-IEA;protein tyrosine kinase collagen receptor activity-IEA;phosphorylation-IEA;protein kinase activity-IEA;kinase activity-IEA;ATP binding-IEA;integral component of plasma membrane-IEA;protein phosphorylation-IEA	5	GO:0005524;GO:0005887;GO:0006468;GO:0038062;GO:0038063	ATP binding;integral component of plasma membrane;protein phosphorylation;protein tyrosine kinase collagen receptor activity;collagen-activated tyrosine kinase receptor signaling pathway	EC:2.7.10;EC:2.7.10.1	Transferring phosphorus-containing groups;Receptor protein-tyrosine kinase	IPR001245;IPR000719;IPR011009	FAMILY;DOMAIN;DOMAIN;DOMAIN;DOMAIN;DOMAIN;HOMOLOGOUS_SUPERFAMILY	Vma22/CCDC115;Serine-threonine/tyrosine-protein kinase, catalytic domain;Serine-threonine/tyrosine-protein kinase, catalytic domain;Serine-threonine/tyrosine-protein kinase, catalytic domain;Serine-threonine/tyrosine-protein kinase, catalytic domain;Protein kinase domain;Protein kinase-like domain superfamily	G3DSA:2.60.120.1190 (GENE3D);PF07714 (PFAM);G3DSA:1.10.510.10 (GENE3D);PTHR24416:SF513 (PANTHER);PTHR24416 (PANTHER);PS50011 (PROSITE_PROFILES);SSF56112 (SUPERFAMILY)	;protein phosphorylation/protein kinase activity;ATP binding/protein phosphorylation/protein kinase activity;
MSTRG.106.1	f5/8 type C domain protein	MWLVVAAVVLQSVSPLRLDECNATALGMESGVIRDSQITASSSFDRQSVGPQNSRIRTEIGSGAWCPKPQIHSSSYEFLQINLESTYIVTAVETQGRYGNGTGREFVSEYMIDYLRPGSKWIRYRNRSGHTLMTANQETTTAVRRVLVPPIVASRIRIVPHSKQMRTICLRMELYGCLHRNGLLFYSTLPAGSRVGGVDFRDKTFENSDLYTETGIKRGLGLLSDGYVSENSPFDGNNPNGSWIGWSKHHTDGIVTLLFEFDQLRIFSGVLLAAYGRINSIDVIFSQDGTNFSLSSQISSLSRSPSDTQKRNDLHIPLHKRMAKKIRVTLSFVADWFFLTEIHFNSVLFNESSVVVDVRSNTVVTPTILGFTALLLSTIVLCLVIHIRRQKSDNKLENF…	789	20	0	0.7269	OESDEN_00476;OESDEN_00476;Acey_s0064.g3519;WR25_09560;ddr-1;ddr-1;WR25_09560;OESDEN_00476;ddr-1;Cre-ddr-1;Cbn-ddr-1;WR25_09560;ddr-1;ANCCAN_18892;Cbn-ddr-1;Acey_s0064.g3519;WR25_09560;WR25_09560;ANCCAN_18892;Acey_s0064.g3519;Acey_s0064.g3519;Acey_s0064.g3519;Acey_s0064.g3519;WR25_09560;Acey_s0064.g3519;ANCCAN_19164;Acey_s0064.g3519;ddr-1;Acey_s0064.g3519;Cre-ddr-1;OESDEN_00476;OESDEN_00476;Acey_s…	GO:0000166-IEA;GO:0004714-IBA;GO:0005518-IBA;GO:0016020-IEA;GO:0016021-IEA;GO:0033674-IBA;GO:0048680-IGI;GO:0048680-IEA;GO:0018108-IEA;GO:0030424-IEA;GO:0007275-IBA;GO:0008045-IGI;GO:0008045-IEA;GO:0038063-IEA;GO:0007169-IBA;GO:0038062-IBA;GO:0038062-IEA;GO:0043235-IBA;GO:0004672-IEA;GO:0007399-IEA;GO:0042995-IEA;GO:0043204-IEA;GO:0005524-IEA;GO:0005887-IBA;GO:0005887-IEA;GO:0006468-IEA;GO:000588…	nucleotide binding-IEA;transmembrane receptor protein tyrosine kinase activity-IBA;collagen binding-IBA;membrane-IEA;integral component of membrane-IEA;positive regulation of kinase activity-IBA;positive regulation of axon regeneration-IGI;positive regulation of axon regeneration-IEA;peptidyl-tyrosine phosphorylation-IEA;axon-IEA;multicellular organism development-IBA;motor neuron axon guidance-I…	7	GO:0005524;GO:0005887;GO:0006468;GO:0008045;GO:0038062;GO:0038063;GO:0048680	ATP binding;integral component of plasma membrane;protein phosphorylation;motor neuron axon guidance;protein tyrosine kinase collagen receptor activity;collagen-activated tyrosine kinase receptor signaling pathway;positive regulation of axon regeneration	EC:2.7.10;EC:2.7.10.1	Transferring phosphorus-containing groups;Receptor protein-tyrosine kinase	IPR000421;IPR008979;IPR001245;IPR000719;IPR000421;IPR000421;IPR008979;IPR011009	DOMAIN;HOMOLOGOUS_SUPERFAMILY;DOMAIN;DOMAIN;DOMAIN;DOMAIN;DOMAIN;DOMAIN;DOMAIN;DOMAIN;HOMOLOGOUS_SUPERFAMILY;HOMOLOGOUS_SUPERFAMILY	Coagulation factor 5/8 C-terminal domain;Galactose-binding-like domain superfamily;Serine-threonine/tyrosine-protein kinase, catalytic domain;Serine-threonine/tyrosine-protein kinase, catalytic domain;Serine-threonine/tyrosine-protein kinase, catalytic domain;Serine-threonine/tyrosine-protein kinase, catalytic domain;Serine-threonine/tyrosine-protein kinase, catalytic domain;Protein kinase domain…	PF00754 (PFAM);G3DSA:2.60.120.260 (GENE3D);PF07714 (PFAM);G3DSA:2.60.120.1190 (GENE3D);G3DSA:1.10.510.10 (GENE3D);PTHR24416 (PANTHER);PTHR24416:SF515 (PANTHER);PS50011 (PROSITE_PROFILES);PS50022 (PROSITE_PROFILES);cd00057 (CDD);SSF49785 (SUPERFAMILY);SSF56112 (SUPERFAMILY)	;protein phosphorylation/protein kinase activity;ATP binding/protein phosphorylation/protein kinase activity;
MSTRG.106.2	f5/8 type C domain protein	MWLVVAAVVLQSVSPLRLDECNATALGMESGVIRDSQITASSSFDRQSVGPQNSRIRTEIGSGAWCPKPQIHSSSYEFLQINLESTYIVTAVETQGRYGNGTGREFVSEYMIDYLRPGSKWIRYRNRSGHTLMTANQETTTAVRRVLVPPIVASRIRIVPHSKQMRTICLRMELYGCLHRNGLLFYSTLPAGSRVGGVDFRDKTFENSDLYTETGIKRGLGLLSDGYVSENSPFDGNNPNGSWIGWSKHHTDGIVTLLFEFDQLRIFSGVLLAAYGRINSIDVIFSQDGTNFSLSSQISSLSRSPSDTQKRNDLHIPLHKRMAKKIRVTLSFVADWFFLTEIHFNSVLFNESSVVVDVRSNTVVTPTILGFTVSSSALLLSTIVLCLVIHIRRQKSDNK…	793	20	0	0.7251	OESDEN_00476;OESDEN_00476;Acey_s0064.g3519;WR25_09560;ddr-1;ddr-1;WR25_09560;OESDEN_00476;ddr-1;Cre-ddr-1;Cbn-ddr-1;WR25_09560;ddr-1;ANCCAN_18892;Cbn-ddr-1;Acey_s0064.g3519;WR25_09560;WR25_09560;ANCCAN_18892;Acey_s0064.g3519;Acey_s0064.g3519;Acey_s0064.g3519;Acey_s0064.g3519;WR25_09560;Acey_s0064.g3519;ANCCAN_19164;Acey_s0064.g3519;ddr-1;Acey_s0064.g3519;Cre-ddr-1;OESDEN_00476;OESDEN_00476;Acey_s…	GO:0000166-IEA;GO:0004714-IBA;GO:0005518-IBA;GO:0016020-IEA;GO:0016021-IEA;GO:0033674-IBA;GO:0048680-IGI;GO:0048680-IEA;GO:0018108-IEA;GO:0030424-IEA;GO:0007275-IBA;GO:0008045-IGI;GO:0008045-IEA;GO:0038063-IEA;GO:0007169-IBA;GO:0038062-IBA;GO:0038062-IEA;GO:0043235-IBA;GO:0004672-IEA;GO:0007399-IEA;GO:0042995-IEA;GO:0043204-IEA;GO:0005524-IEA;GO:0005887-IBA;GO:0005887-IEA;GO:0006468-IEA;GO:000588…	nucleotide binding-IEA;transmembrane receptor protein tyrosine kinase activity-IBA;collagen binding-IBA;membrane-IEA;integral component of membrane-IEA;positive regulation of kinase activity-IBA;positive regulation of axon regeneration-IGI;positive regulation of axon regeneration-IEA;peptidyl-tyrosine phosphorylation-IEA;axon-IEA;multicellular organism development-IBA;motor neuron axon guidance-I…	7	GO:0005524;GO:0005887;GO:0006468;GO:0008045;GO:0038062;GO:0038063;GO:0048680	ATP binding;integral component of plasma membrane;protein phosphorylation;motor neuron axon guidance;protein tyrosine kinase collagen receptor activity;collagen-activated tyrosine kinase receptor signaling pathway;positive regulation of axon regeneration	EC:2.7.10;EC:2.7.10.1	Transferring phosphorus-containing groups;Receptor protein-tyrosine kinase	IPR001245;IPR008979;IPR000421;IPR000719;IPR000421;IPR000421;IPR008979;IPR011009	DOMAIN;HOMOLOGOUS_SUPERFAMILY;HOMOLOGOUS_SUPERFAMILY;DOMAIN;DOMAIN;DOMAIN;DOMAIN;DOMAIN;DOMAIN;DOMAIN;HOMOLOGOUS_SUPERFAMILY;HOMOLOGOUS_SUPERFAMILY	Serine-threonine/tyrosine-protein kinase, catalytic domain;Galactose-binding-like domain superfamily;Galactose-binding-like domain superfamily;Coagulation factor 5/8 C-terminal domain;Coagulation factor 5/8 C-terminal domain;Coagulation factor 5/8 C-terminal domain;Coagulation factor 5/8 C-terminal domain;Protein kinase domain;Coagulation factor 5/8 C-terminal domain;Coagulation factor 5/8 C-term…	PF07714 (PFAM);G3DSA:2.60.120.260 (GENE3D);G3DSA:2.60.120.1190 (GENE3D);PF00754 (PFAM);G3DSA:1.10.510.10 (GENE3D);PTHR24416 (PANTHER);PTHR24416:SF515 (PANTHER);PS50011 (PROSITE_PROFILES);PS50022 (PROSITE_PROFILES);cd00057 (CDD);SSF49785 (SUPERFAMILY);SSF56112 (SUPERFAMILY)	protein phosphorylation/protein kinase activity;ATP binding/protein phosphorylation/protein kinase activity;
transcript_ACOC_0000012701-mRNA-1	f5/8 type C domain protein	MNAMRQRLAWNQVSSVILKSPLAAVSIDKVLDRKIPGFAQKSDPEHGAQNHKYIAVVMNSYRFLYGYYINLESTYIVTAVETQGRYGNGTGREFVSEYMIDYLRPGSKWIRYRNRSGHTLMTANQETTTAVRRVLVPPIVASRIRIVPHSKQMRTICLRMELYGCLHRNGLLFYSTLPAGSRVGGVDFRDKTFENSDLYTETGIKRGLGLLSDGYVSENSPFDGNNPNGSWIGWSKHHTGQN	242	20	0	0.8881	NBR_LOCUS11349;HPBE_LOCUS14131;Acey_s0064.g3519;OESDEN_00476;OESDEN_00476;Acey_s0064.g3519;Acey_s0064.g3519;WR25_09560;TELCIR_08036;ANCCAN_19164;ANCCAN_19164;OESDEN_00476;ANCCAN_18892;NBR_LOCUS11349;ANCCAN_18892;ANCCAN_18892;WR25_09560;TELCIR_08036;WR25_09560;Acey_s0064.g3519;Acey_s0064.g3519;ANCCAN_18892;ANCCAN_18892;Acey_s0064.g3519;ANCCAN_18892;ANCCAN_19164;Acey_s0064.g3519;TELCIR_08036;ANCCAN…	GO:0016020-IEA;GO:0016021-IEA;GO:0038063-IEA;GO:0038062-IEA;GO:0004672-IEA;GO:0005524-IEA;GO:0005887-IEA;GO:0006468-IEA	membrane-IEA;integral component of membrane-IEA;collagen-activated tyrosine kinase receptor signaling pathway-IEA;protein tyrosine kinase collagen receptor activity-IEA;protein kinase activity-IEA;ATP binding-IEA;integral component of plasma membrane-IEA;protein phosphorylation-IEA	5	GO:0005524;GO:0005887;GO:0006468;GO:0038062;GO:0038063	ATP binding;integral component of plasma membrane;protein phosphorylation;protein tyrosine kinase collagen receptor activity;collagen-activated tyrosine kinase receptor signaling pathway	EC:2.7.10;EC:2.7.10.1	Transferring phosphorus-containing groups;Receptor protein-tyrosine kinase	IPR000421;IPR008979;IPR000421;IPR008979	HOMOLOGOUS_SUPERFAMILY;DOMAIN;HOMOLOGOUS_SUPERFAMILY;HOMOLOGOUS_SUPERFAMILY;HOMOLOGOUS_SUPERFAMILY;DOMAIN;HOMOLOGOUS_SUPERFAMILY	P-loop containing nucleoside triphosphate hydrolase;Coagulation factor 5/8 C-terminal domain;Galactose-binding-like domain superfamily;Galactose-binding-like domain superfamily;Galactose-binding-like domain superfamily;Coagulation factor 5/8 C-terminal domain;Galactose-binding-like domain superfamily	G3DSA:2.60.120.1190 (GENE3D);PF00754 (PFAM);G3DSA:2.60.120.260 (GENE3D);PTHR24416:SF515 (PANTHER);PTHR24416 (PANTHER);PS50022 (PROSITE_PROFILES);SSF49785 (SUPERFAMILY)	;
MSTRG.109.1	Protein KIAA0556 homolog	MNDHGFQNYSESRVHAQMGVRRLRAALDGRSIFVGEIDRAFADHESEPMGETILFTTEESILEAIAENDVCLANNMEKTQSTCDFVGEDLVLGLTPGRPVTREMNRVPNNKEKPHCSTLTDVEEDGSVGKVKVIHLELCGNWGAPGLIGLCGLELLDNKDDVIDPSTMTISANDGSDCDSQRLLNGNNLTRSPDDMWLTTFDPKYPPTITIMLLKPTVVKGISFWNYNASQELAYAGVRLLNICTNGKAVVNNVLLRKAPGFVLFDFVQDVHIDRHPTIRPLMRPATHSVYGFIFQLRLLSSWGDEFYIGLNGIELYDRQDKRINVGPHNLAAFPESVNILPSVEGDPRACLNLINGCNDTNRAEQMWLTPILPNRCARVFFVFDDPVAVSTIVIYNYR…	441	20	0	0.7308	K04F10.2;K04F10.2;K04F10.2	GO:0005856-IEA;GO:0005737-IEA;GO:0042995-IEA	cytoskeleton-IEA;cytoplasm-IEA;cell projection-IEA	1	GO:0110165	cellular anatomical entity	-	-	IPR027859;IPR026704	DOMAIN;FAMILY	Domain of unknown function DUF4457;Protein KIAA0556	PF14652 (PFAM);PTHR21534 (PANTHER)	;
MSTRG.110.1	aminotransferase, class V	MVTRCAVAVTRICCRPLATQAVDVSSAYPIYLDVQATSPMDPRVVDAMIPYMVNDYGNAHSRTHAFGWKAEAAVEKARAQVAALINADPREVVFTSGATESNNIAIKGVSKFQHHTGKNHIITVQTEHKCVLDSCRSLEAEGFYVTYLPVDQRGRVDLKKLEDAINPQTCLVSVMTVNNEIGVIQPIKEIGDICREKKVTFHTDAAQALGKVPIDVNALKVDLMSISGHKIYGPKGIGALYVRRRPRVRLEAQMSGGGQERGMRSGTLPTALCVGLGEACRIASKEMEMDAAHVTRLSNMLLDGIQSKLSEIIRNGDPDHAYPGCVNLSFAYVEGESLLMALKSVALSSGSACTSASLEPSYVLRAIGAEEDLAHSSIRFGIGRFTTEKEVQHTIDLCV…	429	20	0	0.8968	CBG12821;FL81_17085;ACOC_LOCUS130;nfs-1;CRE_28484;GCK72_001911;HPLM_LOCUS11929;NBR_LOCUS7043;OESDEN_01114;CAEBREN_24116;HPBE_LOCUS16862;HPLM_LOCUS11929;CBG12821;CAEBREN_24116;HPLM_LOCUS11929;CBG12821;Cni-B0205.6;WR25_00503;CBG12821;nfs-1;GCK72_001911;DICVIV_09026;ANCCAN_16226;CBG12821;ANCCEY_02034;nfs-1;CRE_28484;nfs-1;NBR_LOCUS7043;CBG12821;HPBE_LOCUS16862;OESDEN_01114;ANCCAN_16226;ANCCEY_02034;…	GO:0003824-IEA;GO:0005739-IBA;GO:0044571-IEA;GO:0005829-IBA;GO:0016740-IEA;GO:0016226-IBA;GO:0031071-IBA;GO:0031071-IEA;GO:0030170-IEA;GO:0008483-IEA;GO:0004672-IEA;GO:0005634-IBA;GO:0005524-IEA;GO:0006468-IEA	catalytic activity-IEA;mitochondrion-IBA;[2Fe-2S] cluster assembly-IEA;cytosol-IBA;transferase activity-IEA;iron-sulfur cluster assembly-IBA;cysteine desulfurase activity-IBA;cysteine desulfurase activity-IEA;pyridoxal phosphate binding-IEA;transaminase activity-IEA;protein kinase activity-IEA;nucleus-IBA;ATP binding-IEA;protein phosphorylation-IEA	10	GO:0004672;GO:0005524;GO:0005634;GO:0005739;GO:0005829;GO:0006468;GO:0008483;GO:0030170;GO:0031071;GO:0044571	protein kinase activity;ATP binding;nucleus;mitochondrion;cytosol;protein phosphorylation;transaminase activity;pyridoxal phosphate binding;cysteine desulfurase activity;[2Fe-2S] cluster assembly	EC:2.8.1.7	Cysteine desulfurase	IPR016454;IPR000192;IPR015422;IPR015421;IPR010240;IPR010240;IPR010240;IPR015424	FAMILY;DOMAIN;HOMOLOGOUS_SUPERFAMILY;HOMOLOGOUS_SUPERFAMILY;FAMILY;FAMILY;FAMILY;FAMILY;HOMOLOGOUS_SUPERFAMILY	Cysteine desulfurase;Aminotransferase class V domain;Pyridoxal phosphate-dependent transferase domain 1;Pyridoxal phosphate-dependent transferase, major domain;Cysteine desulfurase IscS;Cysteine desulfurase IscS;Cysteine desulfurase IscS;Cysteine desulfurase IscS;Pyridoxal phosphate-dependent transferase	PIRSF005572 (PIRSF);PF00266 (PFAM);G3DSA:3.90.1150.10 (GENE3D);G3DSA:3.40.640.10 (GENE3D);TIGR02006 (TIGRFAM);PTHR11601 (PANTHER);PTHR11601:SF34 (PANTHER);MF_00331 (HAMAP);SSF53383 (SUPERFAMILY)	;catalytic activity;catalytic activity;cysteine desulfurase activity/pyridoxal phosphate binding/[2Fe-2S] cluster assembly;cysteine desulfurase activity/pyridoxal phosphate binding/[2Fe-2S] cluster assembly;cysteine desulfurase activity/pyridoxal phosphate binding/[2Fe-2S] cluster assembly;
MSTRG.111.1	AChain A, Casein Kinase Ii Subunit Alpha	MAPVASKSRVYADVNPLRPREYWDYEAHVIEWGNIDDYQLVRKLGRGKYSEVFEGVKITTDEKVVIKILKPVKKKKIKREIKILENLRGGTNVITLLDVVKDPISRTPALIFEYVNNSDFKQLYGTLSDLDIRYYLYELLKALDYCHSQGIMHRDVKPHNVMIDHEKKQLRLIDWGLAEFYHPKQDYNVRVASRYFKGPELLVDYQCYDYSLDMWSLGCMLASMIFRKEPFFHGHDNYDQLVRIAKVLGTEELHEYVEKYRIELDPRFNDILGRHSRKRWERFIHAENQHLVTPEAIDFLDKLLRYDHQERLTAREAMAHPYFFPVVDSARQSGDTLSAKSEHSELLPQAVATS	354	20	0	0.9433	DICVIV_09025;kin-3;Cre-kin-3;CSNK2A1;CK2A;bma-kin-3;kin-3;Cre-kin-3;CK2A;WR25_00503;WUBG_02507;kin-3;ANCCAN_16227;Cre-kin-3;Cre-kin-3;Cre-kin-3;DICVIV_09025;Cre-kin-3;kin-3;bma-kin-3;Bma-kin-3;CK2A;bma-kin-3;bma-kin-3;kin-3;Cre-kin-3;NBR_LOCUS7042;ANCCAN_16227;ANCCAN_16227;Cre-kin-3;Acey_s0086.g1991;BPAG_LOCUS968;NBR_LOCUS7042;CSNK2A1;NBR_LOCUS7042;CSNK2A1;kin-3;Cre-kin-3;ANCCAN_16227;bma-kin-3;k…	GO:0034608-IEA;GO:0000166-IEA;GO:0097730-IEA;GO:0005956-IBA;GO:0005956-IEA;GO:0034606-IEA;GO:0003824-IEA;GO:0044571-IEA;GO:0005829-IBA;GO:0005929-IEA;GO:0051726-IBA;GO:0016310-IEA;GO:0016301-IEA;GO:0018105-IBA;GO:0018105-IEA;GO:0030425-IEA;GO:0030424-IEA;GO:0018107-IBA;GO:0031071-IEA;GO:0030170-IEA;GO:0043025-IEA;GO:0004672-IEA;GO:0004674-IBA;GO:0004674-IEA;GO:0005634-IBA;GO:0005634-IEA;GO:000552…	vulval location-IEA;nucleotide binding-IEA;non-motile cilium-IEA;protein kinase CK2 complex-IBA;protein kinase CK2 complex-IEA;response to hermaphrodite contact-IEA;catalytic activity-IEA;[2Fe-2S] cluster assembly-IEA;cytosol-IBA;cilium-IEA;regulation of cell cycle-IBA;phosphorylation-IEA;kinase activity-IEA;peptidyl-serine phosphorylation-IBA;peptidyl-serine phosphorylation-IEA;dendrite-IEA;axon…	17	GO:0004674;GO:0005524;GO:0005634;GO:0005829;GO:0005956;GO:0018105;GO:0018107;GO:0030170;GO:0030424;GO:0030425;GO:0031071;GO:0034606;GO:0034608;GO:0043025;GO:0044571;GO:0051726;GO:0097730	protein serine/threonine kinase activity;ATP binding;nucleus;cytosol;protein kinase CK2 complex;peptidyl-serine phosphorylation;peptidyl-threonine phosphorylation;pyridoxal phosphate binding;axon;dendrite;cysteine desulfurase activity;response to hermaphrodite contact;vulval location;neuronal cell body;[2Fe-2S] cluster assembly;regulation of cell cycle;non-motile cilium	EC:2.8.1.7	Cysteine desulfurase	IPR000719;IPR000719;IPR011009	FAMILY;DOMAIN;DOMAIN;DOMAIN;DOMAIN;DOMAIN;DOMAIN;HOMOLOGOUS_SUPERFAMILY	Minichromosome maintenance protein 10;Protein kinase domain;Protein kinase domain;Protein kinase domain;Protein kinase domain;Protein kinase domain;Protein kinase domain;Protein kinase-like domain superfamily	G3DSA:3.30.200.20 (GENE3D);PF00069 (PFAM);G3DSA:1.10.510.10 (GENE3D);PTHR24054:SF28 (PANTHER);PTHR24054 (PANTHER);PS50011 (PROSITE_PROFILES);cd14132 (CDD);SSF56112 (SUPERFAMILY)	;ATP binding/protein phosphorylation/protein kinase activity;ATP binding/protein phosphorylation/protein kinase activity;
transcript_ACOC_0000013001-mRNA-1	CMGC/CK2 protein kinase	MAPVASKSRVYADVNPLRPREYWDYEAHVIEWGNIDDYQLVRKLGRGKYSEPVKKKKIKREIKILENLRGGTNVITLLDVVKDPISRTPALIFEYVNNSDFKQLYGTLSDLDIRYYLYELLKALDYCHSQGIMHRDVKPHNVMIDHEKKQLRLIDWGLAEFYHPKQDYNVRVASRYFKGPELLVDYQCYDYSLDMWSLGCMLASMIFRKEPFFHGHDNYDQLVRIAKVLGTEELHEYVEKYRIELDPRFNDILGRHSRKRWERFIHAENQHLVTPEAIDFLDKLLRYDHQERLTAREAMAHPYFFPVVDSARQSGDTLSAKSEHSELLPQAVATS	335	20	0	0.8954	OFLC_LOCUS20;DICVIV_09025;Cbn-kin-3;kin-3;Cre-kin-3;CSNK2A1;kin-3;kin-3;bma-kin-3;kin-3;Cre-kin-3;kin-3;WR25_00503;WUBG_02507;kin-3;kin-3;kin-3;ANCCAN_16227;kin-3;Cbn-kin-3;Cre-kin-3;kin-3;LOAG_03081;Cre-kin-3;Cre-kin-3;DICVIV_09025;Cre-kin-3;kin-3;bma-kin-3;LOAG_03081;Bma-kin-3;bma-kin-3;bma-kin-3;kin-3;kin-3;LOAG_03081;kin-3;Cre-kin-3;kin-3;NBR_LOCUS7042;ANCCAN_16227;ANCCAN_16227;kin-3;kin-3;ki…	GO:0034608-IMP;GO:0034608-IEA;GO:0034606-IMP;GO:0034606-IEA;GO:0003824-IEA;GO:0044571-IEA;GO:0005829-IBA;GO:0005929-IDA;GO:0005929-IEA;GO:0051726-IBA;GO:0016740-IEA;GO:0016301-IEA;GO:0018105-IDA;GO:0018105-IBA;GO:0018105-IEA;GO:0030425-IDA;GO:0030425-IEA;GO:0030424-IDA;GO:0030424-IEA;GO:0018107-IBA;GO:0031071-IEA;GO:0043025-IDA;GO:0043025-IEA;GO:0004672-IDA;GO:0004672-IEA;GO:0042995-IEA;GO:000467…	vulval location-IMP;vulval location-IEA;response to hermaphrodite contact-IMP;response to hermaphrodite contact-IEA;catalytic activity-IEA;[2Fe-2S] cluster assembly-IEA;cytosol-IBA;cilium-IDA;cilium-IEA;regulation of cell cycle-IBA;transferase activity-IEA;kinase activity-IEA;peptidyl-serine phosphorylation-IDA;peptidyl-serine phosphorylation-IBA;peptidyl-serine phosphorylation-IEA;dendrite-IDA;d…	19	GO:0004674;GO:0005515;GO:0005524;GO:0005634;GO:0005829;GO:0005956;GO:0016055;GO:0018105;GO:0018107;GO:0030170;GO:0030424;GO:0030425;GO:0031071;GO:0034606;GO:0034608;GO:0043204;GO:0044571;GO:0051726;GO:0097730	protein serine/threonine kinase activity;protein binding;ATP binding;nucleus;cytosol;protein kinase CK2 complex;Wnt signaling pathway;peptidyl-serine phosphorylation;peptidyl-threonine phosphorylation;pyridoxal phosphate binding;axon;dendrite;cysteine desulfurase activity;response to hermaphrodite contact;vulval location;perikaryon;[2Fe-2S] cluster assembly;regulation of cell cycle;non-motile cil…	EC:2.8.1.7	Cysteine desulfurase	IPR000719;IPR000719;IPR011009	HOMOLOGOUS_SUPERFAMILY;HOMOLOGOUS_SUPERFAMILY;HOMOLOGOUS_SUPERFAMILY;DOMAIN;DOMAIN;DOMAIN;DOMAIN;DOMAIN;HOMOLOGOUS_SUPERFAMILY	Protein kinase-like domain superfamily;Protein kinase-like domain superfamily;Protein kinase-like domain superfamily;Protein kinase domain;Protein kinase domain;Protein kinase domain;Protein kinase domain;Protein kinase domain;Protein kinase-like domain superfamily	G3DSA:3.30.200.20 (GENE3D);G3DSA:3.30.200.20 (GENE3D);G3DSA:1.10.510.10 (GENE3D);PF00069 (PFAM);PTHR24054:SF28 (PANTHER);PTHR24054 (PANTHER);PS50011 (PROSITE_PROFILES);cd14132 (CDD);SSF56112 (SUPERFAMILY)	;ATP binding/protein phosphorylation/protein kinase activity;ATP binding/protein phosphorylation/protein kinase activity;
MSTRG.112.1	ribosomal protein L9 domain protein	MLWTTAISSQLRPLMGKALQSSRSTWVLRRVFAPEPTPPGKTQRNPEELPNLMKLEVVEFETLKPAGPLKVILLEDVEGVGHQFDVVDVDRRLARSDLLLTRKAVYASPFDLEYYGQIKKEMADELAKKVRIPYEYICIGRDLQAIVVPIRVSIENKWTIDRQILKTSLRLIGIDMTDDAIFFDDAISGPNFEIEAKLVRFYVVVSKQYIVPMLGRISHISVDESKQMLSPEANRPVTKDQLTRHKIKPEEPYYSPEPGIDGTFPVVDFMRSKARSP	277	20	1.3e-148	0.8445	Acey_s0086.g1989;TELCIR_15949;NLS_LOCUS3893;OESDEN_01112;DICVIV_09024;GCK72_001909;NBR_LOCUS7041;CAEBREN_07756;PRIPAC_40178;L596_008303;Acey_s0086.g1989;CRE_28168;HPLM_LOCUS11931;OESDEN_01112;GCK72_001909;TCNE_LOCUS13755;ANCCAN_26785;HPLM_LOCUS11931;TCNE_LOCUS13755;HPLM_LOCUS11931;CAEBREN_07756;TELCIR_15949;L596_008303;PRIPAC_40178;CRE_28168;Acey_s0086.g1989;Acey_s0086.g1989;ANCCAN_26785;mRpL9;Ac…	GO:0003735-IEA;GO:0008540-IEA;GO:0016020-IEA;GO:0016021-IEA;GO:0005840-IEA;GO:0006412-IEA;GO:0006511-IEA	structural constituent of ribosome-IEA;proteasome regulatory particle, base subcomplex-IEA;membrane-IEA;integral component of membrane-IEA;ribosome-IEA;translation-IEA;ubiquitin-dependent protein catabolic process-IEA	6	GO:0003735;GO:0005840;GO:0006412;GO:0006511;GO:0008540;GO:0016021	structural constituent of ribosome;ribosome;translation;ubiquitin-dependent protein catabolic process;proteasome regulatory particle, base subcomplex;integral component of membrane	-	-	IPR020070;IPR036935;IPR000244;IPR009027	DOMAIN;HOMOLOGOUS_SUPERFAMILY;FAMILY;FAMILY;HOMOLOGOUS_SUPERFAMILY	Ribosomal protein L9, N-terminal;Ribosomal protein L9, N-terminal domain superfamily;Ribosomal protein L9;Ribosomal protein L9;Ribosomal protein L9/RNase H1, N-terminal	PF01281 (PFAM);G3DSA:3.40.5.10 (GENE3D);PTHR21368 (PANTHER);PTHR21368:SF18 (PANTHER);SSF55658 (SUPERFAMILY)	;translation/ribosome/structural constituent of ribosome;
transcript_ACOC_0000013101-mRNA-1	ribosomal protein L9 domain protein	MKLEVVEFETLKPAGPLKVILLEDVEGVGHQFDVVDVDRRLARSDLLLTRKAVYASPFDLEYYGQIKKEMADELAKKVRIPYEYICIGRDLQAIVVPIRVSIENKWTIDRQILKTSLRLIGIDMTDDAIFFDDAISGPNFEIEAKLVRFYVVVCSFFFTFLLVF	164	20	1.3e-114	0.8786	Acey_s0086.g1989;TELCIR_15949;NLS_LOCUS3893;OESDEN_01112;ACOC_LOCUS132;DICVIV_09024;NBR_LOCUS7041;CAEBREN_07756;PRIPAC_40178;L596_008303;Acey_s0086.g1989;OESDEN_01112;TCNE_LOCUS13755;ANCCAN_26785;TCNE_LOCUS13755;CAEBREN_07756;TELCIR_15949;L596_008303;PRIPAC_40178;ACOC_LOCUS132;Acey_s0086.g1989;Acey_s0086.g1989;ANCCAN_26785;ANCCAN_16228;mRpL9;NECAME_14771;Acey_s0086.g1989;Acey_s0086.g1989;ACOC_LOC…	GO:0003735-IEA;GO:0008540-IEA;GO:0016020-IEA;GO:0016021-IEA;GO:0005840-IEA;GO:0006412-IEA;GO:0006511-IEA	structural constituent of ribosome-IEA;proteasome regulatory particle, base subcomplex-IEA;membrane-IEA;integral component of membrane-IEA;ribosome-IEA;translation-IEA;ubiquitin-dependent protein catabolic process-IEA	6	GO:0003735;GO:0005840;GO:0006412;GO:0006511;GO:0008540;GO:0016021	structural constituent of ribosome;ribosome;translation;ubiquitin-dependent protein catabolic process;proteasome regulatory particle, base subcomplex;integral component of membrane	-	-	IPR036935;IPR020070;IPR000244;IPR009027	HOMOLOGOUS_SUPERFAMILY;DOMAIN;DOMAIN;FAMILY;HOMOLOGOUS_SUPERFAMILY	Ribosomal protein L9, N-terminal domain superfamily;Ribosomal protein L9, N-terminal;Ribosomal protein L9, N-terminal;Ribosomal protein L9;Ribosomal protein L9/RNase H1, N-terminal	G3DSA:3.40.5.10 (GENE3D);PF01281 (PFAM);PTHR21368:SF18 (PANTHER);PTHR21368 (PANTHER);SSF55658 (SUPERFAMILY)	;translation/ribosome/structural constituent of ribosome;
transcript_ACOC_0000013201-mRNA-1	26S proteasome non-ATPase regulatory subunit 4	MVQESTMICVDNSEWMRNGDFVPTRLQCQQDAANLILQCKLRANPENAVGLLSMANQVQVLSTMTQESGRLFMKLHQLEPQGHCNFMSAIKIAHLALKHRQNRNHKMRIVIFIGSPIDDLDSAELTKIAKKLKKEKVQCDVICFGEADSENSQIMGQFIDTLNGKEGNGSNLLVVPAGSALTEALISSAVCRGEDGGNAPVVGTGGGFEFGVDPEDDPDLALALRVSMEEERARQAAEAAAAAANASSEVPTSAGNIDVMDMEMGEMTEEQQLEWALRMSMQDSVPCTMDNIDELINNPELLQQIIDDLPGGEKVFPFVYFFSP	324	20	0	0.8221	NAV_LOCUS5273;bma-rpn-10;rpn-10;HPBE_LOCUS23816;Bma-rpn-10;WBA_LOCUS416;DME_LOCUS7625;DICVIV_09024;rpn-10;rpn-10;rpn-10;ANCCAN_16230;rpn-10;HPLM_LOCUS11931;CAEBREN_10201;rpn-10;LOAG_17971;Cni-rpn-10;HPLM_LOCUS11931;rpn-10;rpn-10;rpn-10;rpn-10;HPLM_LOCUS11931;ANCDUO_08713;ACOC_LOCUS133;rpn-10;ANCCAN_16230;Bma-rpn-10;NAV_LOCUS5273;ANCDUO_08713;bma-rpn-10;bma-rpn-10;WBA_LOCUS416;CAEBREN_17091;L596_0…	GO:0005737-IDA;GO:0005737-IEA;GO:0043161-IBA;GO:0005829-IBA;GO:0016020-IEA;GO:0016021-IEA;GO:0007283-IGI;GO:0007283-IMP;GO:0007283-IEA;GO:0031593-IBA;GO:0008540-IBA;GO:0008540-IEA;GO:0000502-IEA;GO:0005840-IEA;GO:0043248-IBA;GO:0005634-IDA;GO:0005634-IBA;GO:0005634-IEA;GO:0006511-IMP;GO:0006511-IGI;GO:0006511-IEA	cytoplasm-IDA;cytoplasm-IEA;proteasome-mediated ubiquitin-dependent protein catabolic process-IBA;cytosol-IBA;membrane-IEA;integral component of membrane-IEA;spermatogenesis-IGI;spermatogenesis-IMP;spermatogenesis-IEA;polyubiquitin modification-dependent protein binding-IBA;proteasome regulatory particle, base subcomplex-IBA;proteasome regulatory particle, base subcomplex-IEA;proteasome complex-I…	9	GO:0005634;GO:0005829;GO:0005840;GO:0007283;GO:0008540;GO:0016020;GO:0031593;GO:0043161;GO:0043248	nucleus;cytosol;ribosome;spermatogenesis;proteasome regulatory particle, base subcomplex;membrane;polyubiquitin modification-dependent protein binding;proteasome-mediated ubiquitin-dependent protein catabolic process;proteasome assembly	-	-	IPR002035;IPR003903;IPR036465;IPR027040;IPR003903;IPR002035;IPR003903;IPR036465	DOMAIN;CONSERVED_SITE;HOMOLOGOUS_SUPERFAMILY;HOMOLOGOUS_SUPERFAMILY;FAMILY;CONSERVED_SITE;DOMAIN;CONSERVED_SITE;HOMOLOGOUS_SUPERFAMILY	von Willebrand factor, type A;Ubiquitin interacting motif;von Willebrand factor A-like domain superfamily;von Willebrand factor A-like domain superfamily;Proteasome subunit Rpn10;Ubiquitin interacting motif;von Willebrand factor, type A;Ubiquitin interacting motif;von Willebrand factor A-like domain superfamily	PF13519 (PFAM);PF02809 (PFAM);G3DSA:3.40.50.410 (GENE3D);PTHR10223 (PANTHER);PTHR10223:SF0 (PANTHER);PS50330 (PROSITE_PROFILES);PS50234 (PROSITE_PROFILES);PS50330 (PROSITE_PROFILES);SSF53300 (SUPERFAMILY)	;proteasome regulatory particle, base subcomplex/ubiquitin-dependent protein catabolic process;
MSTRG.113.1	26S proteasome non-ATPase regulatory subunit 4	MVQESTMICVDNSEWMRNGDFVPTRLQCQQDAANLILQCKLRANPENAVGLLSMANQVQVLSTMTQESGRLFMKLHQLEPQGHCNFMSAIKIAHLALKHRQNRNHKMRIVIFIGSPIDDLDSAELTKIAKKLKKEKVQCDVICFGEADSENSQIMGQFIDTLNGKEGNGSNLLVVPAGSALTEALISSAVCRGEDGGNAPVVGTGGGFEFGVDPEDDPDLALALRVSMEEERARQAAEAAAAAANASSEVPTSAGADIAQNIDVMDMEMGEMTEEQQLEWALRMSMQDSVPSTQPPQGQPVEETMDVTTAQMDNIDELINNPELLQQIIDDLPGGEKKEEEKPKSERK	348	20	0	0.7945	NAV_LOCUS5273;bma-rpn-10;rpn-10;HPBE_LOCUS23816;Bma-rpn-10;WBA_LOCUS416;DME_LOCUS7625;DICVIV_09024;rpn-10;rpn-10;rpn-10;ANCCAN_16230;rpn-10;HPLM_LOCUS11931;CAEBREN_10201;rpn-10;LOAG_17971;HPLM_LOCUS11931;rpn-10;rpn-10;rpn-10;rpn-10;HPLM_LOCUS11931;ANCDUO_08713;ACOC_LOCUS133;rpn-10;ANCCAN_16230;Bma-rpn-10;NAV_LOCUS5273;ANCDUO_08713;bma-rpn-10;bma-rpn-10;WBA_LOCUS416;CAEBREN_17091;L596_008263;HPBE_…	GO:0005737-IDA;GO:0005737-IEA;GO:0043161-IBA;GO:0005829-IBA;GO:0016020-IEA;GO:0016021-IEA;GO:0007283-IGI;GO:0007283-IMP;GO:0007283-IEA;GO:0031593-IBA;GO:0008540-IBA;GO:0008540-IEA;GO:0000502-IEA;GO:0005840-IEA;GO:0043248-IBA;GO:0005634-IDA;GO:0005634-IBA;GO:0005634-IEA;GO:0006511-IMP;GO:0006511-IGI;GO:0006511-IEA	cytoplasm-IDA;cytoplasm-IEA;proteasome-mediated ubiquitin-dependent protein catabolic process-IBA;cytosol-IBA;membrane-IEA;integral component of membrane-IEA;spermatogenesis-IGI;spermatogenesis-IMP;spermatogenesis-IEA;polyubiquitin modification-dependent protein binding-IBA;proteasome regulatory particle, base subcomplex-IBA;proteasome regulatory particle, base subcomplex-IEA;proteasome complex-I…	9	GO:0005634;GO:0005829;GO:0005840;GO:0007283;GO:0008540;GO:0016021;GO:0031593;GO:0043161;GO:0043248	nucleus;cytosol;ribosome;spermatogenesis;proteasome regulatory particle, base subcomplex;integral component of membrane;polyubiquitin modification-dependent protein binding;proteasome-mediated ubiquitin-dependent protein catabolic process;proteasome assembly	-	-	IPR003903;IPR002035;IPR036465;IPR027040;IPR003903;IPR003903;IPR002035;IPR036465	CONSERVED_SITE;DOMAIN;HOMOLOGOUS_SUPERFAMILY;HOMOLOGOUS_SUPERFAMILY;HOMOLOGOUS_SUPERFAMILY;HOMOLOGOUS_SUPERFAMILY;FAMILY;CONSERVED_SITE;CONSERVED_SITE;DOMAIN;HOMOLOGOUS_SUPERFAMILY	Ubiquitin interacting motif;von Willebrand factor, type A;von Willebrand factor A-like domain superfamily;von Willebrand factor A-like domain superfamily;von Willebrand factor A-like domain superfamily;von Willebrand factor A-like domain superfamily;Proteasome subunit Rpn10;Ubiquitin interacting motif;Ubiquitin interacting motif;von Willebrand factor, type A;von Willebrand factor A-like domain su…	PF02809 (PFAM);PF13519 (PFAM);G3DSA:3.40.50.410 (GENE3D);mobidb-lite (MOBIDB_LITE);mobidb-lite (MOBIDB_LITE);PTHR10223 (PANTHER);PTHR10223:SF0 (PANTHER);PS50330 (PROSITE_PROFILES);PS50330 (PROSITE_PROFILES);PS50234 (PROSITE_PROFILES);SSF53300 (SUPERFAMILY)	;proteasome regulatory particle, base subcomplex/ubiquitin-dependent protein catabolic process;
MSTRG.114.1	fork head domain protein	MESDMEKHCVDALRDYQRTLLAMDPCNDISQFGIPLRLGLMPSRSFFSPTSLFPILDQPKPQYSYIGLIAMAILSSPEKKMVLSEVYEWIMIHYPYFRTRGSGWRNSIRHNLSLNDCFVKAGRAANGKGHYWAVHPACLRDFERGDFRRRRAQRKVRRHMGLSVPDGESSDDSPHPSPAFVFPVQEFKLGTSPSRRRDFSIDSLLADDM	209	20	5.6e-149	0.8832	HPBE_LOCUS19402;Acey_s0017.g3472;NECAME_04384;DME_LOCUS190;ANCCAN_30535;Acey_s0017.g3472;HPLM_LOCUS19400;HPLM_LOCUS19400;fkh-10;B4U80_01106;ANCDUO_09435;fkh-10;OESDEN_02306;ANCDUO_09435;fkh-10;NECAME_04384;OESDEN_02306;fkh-10;HPBE_LOCUS19402;ANCCAN_30535;ANCCAN_30535;L596_009850;L596_009850;Acey_s0017.g3472;Acey_s0017.g3472;OESDEN_02306;SVUK_LOCUS912;B4U80_01106;HPLM_LOCUS19400;ANCDUO_09435;DME_L…	GO:0003677-IEA;GO:0000981-IBA;GO:0003700-IEA;GO:0016020-IEA;GO:0016021-IEA;GO:0006355-IEA;GO:0030154-IBA;GO:0043565-IEA;GO:0009653-IBA;GO:0005634-IBA;GO:0005634-IEA;GO:0006357-IBA	DNA binding-IEA;DNA-binding transcription factor activity, RNA polymerase II-specific-IBA;DNA-binding transcription factor activity-IEA;membrane-IEA;integral component of membrane-IEA;regulation of transcription, DNA-templated-IEA;cell differentiation-IBA;sequence-specific DNA binding-IEA;anatomical structure morphogenesis-IBA;nucleus-IBA;nucleus-IEA;regulation of transcription by RNA polymerase …	7	GO:0000981;GO:0005634;GO:0006357;GO:0009653;GO:0016021;GO:0030154;GO:0043565	DNA-binding transcription factor activity, RNA polymerase II-specific;nucleus;regulation of transcription by RNA polymerase II;anatomical structure morphogenesis;integral component of membrane;cell differentiation;sequence-specific DNA binding	-	-	IPR001766;IPR036388;IPR001766;IPR001766;IPR001766;IPR036390	DOMAIN;HOMOLOGOUS_SUPERFAMILY;DOMAIN;DOMAIN;DOMAIN;DOMAIN;DOMAIN;DOMAIN;HOMOLOGOUS_SUPERFAMILY	Fork head domain;Winged helix-like DNA-binding domain superfamily;Fork head domain;Fork head domain;Fork head domain;Fork head domain;Fork head domain;Fork head domain;Winged helix DNA-binding domain superfamily	PR00053 (PRINTS);G3DSA:1.10.10.10 (GENE3D);PF00250 (PFAM);mobidb-lite (MOBIDB_LITE);PTHR11829 (PANTHER);PTHR11829:SF142 (PANTHER);PS50039 (PROSITE_PROFILES);cd00059 (CDD);SSF46785 (SUPERFAMILY)	sequence-specific DNA binding/DNA-binding transcription factor activity/regulation of transcription, DNA-templated;sequence-specific DNA binding/DNA-binding transcription factor activity/regulation of transcription, DNA-templated;sequence-specific DNA binding/DNA-binding transcription factor activity/regulation of transcription, DNA-templated;sequence-specific DNA binding/DNA-binding transcriptio…
MSTRG.116.1	RNA recognition motif domain containing protein	MSRGGRTDNGSARKRRNDRSRSRSPQKGDPKRIAGGRDGDRRSGANDRMVFITNLAYEVRWVELKDILREHGGEVVFVELLEDRNGHPKGNAIAEFKTKEGATNCIKNLDGFEIRKRKIITKLIRDPVAFLRKVQEETGIDYLAKCGGSWLSRGRGDERPARTGSFDLFGLSPEFLRQHNIEPPLCDRVFIANLSFNVGTGRIYEIFGLAGNIVWMDLHMDKEGKSKGVCILQFSHPIEAVQAISMFHGQKLYDRVLVVKMDRYEKNEPAREGALPRGLEGIRGDASVPVAPVAPVTAQPTQFPSFGMNSGVISGGTAFQSTPYSLTSHISNGSAVGAFSSALGGFEGRREDSYAGADSRRDDTQFGMNFNVSRVVIIRNLPPDYTWQIVRDRVQQFGD…	444	20	0	0.7724	NBR_LOCUS22467;ACOC_LOCUS135;sup-46;Cni-C25A1.4;Acey_s0017.g3477;NECAME_04382;FL82_23180;ANCCEY_07254;sup-46;Acey_s0017.g3477;Acey_s0017.g3477;Acey_s0017.g3477;sup-46;CAEBREN_19066;sup-46;FL83_18870;Acey_s0017.g3477;Acey_s0017.g3477;sup-46;CAEBREN_19066;FL83_18870;ANCCEY_07254;Acey_s0017.g3477;sup-46;FL82_23180;DICVIV_09011;NBR_LOCUS22467;sup-46;CRE_23966;Acey_s0017.g3477;ANCDUO_23159;Acey_s0017.…	GO:0005515-IPI;GO:0003723-IEA;GO:0005737-IBA;GO:0071014-IBA;GO:2000815-IBA;GO:0003729-IBA;GO:1990904-IBA;GO:0005634-IBA;GO:0003676-IEA	protein binding-IPI;RNA binding-IEA;cytoplasm-IBA;post-mRNA release spliceosomal complex-IBA;regulation of mRNA stability involved in response to oxidative stress-IBA;mRNA binding-IBA;ribonucleoprotein complex-IBA;nucleus-IBA;nucleic acid binding-IEA	4	GO:0003723;GO:0005515;GO:0005634;GO:1990904	RNA binding;protein binding;nucleus;ribonucleoprotein complex	-	-	IPR000504;IPR012677;IPR012677;IPR012677;IPR000504;IPR000504;IPR000504;IPR035979;IPR035979	DOMAIN;HOMOLOGOUS_SUPERFAMILY;HOMOLOGOUS_SUPERFAMILY;HOMOLOGOUS_SUPERFAMILY;HOMOLOGOUS_SUPERFAMILY;HOMOLOGOUS_SUPERFAMILY;HOMOLOGOUS_SUPERFAMILY;HOMOLOGOUS_SUPERFAMILY;DOMAIN;DOMAIN;DOMAIN;DOMAIN;HOMOLOGOUS_SUPERFAMILY;HOMOLOGOUS_SUPERFAMILY	RNA recognition motif domain;Nucleotide-binding alpha-beta plait domain superfamily;Nucleotide-binding alpha-beta plait domain superfamily;Nucleotide-binding alpha-beta plait domain superfamily;Nucleotide-binding alpha-beta plait domain superfamily;Nucleotide-binding alpha-beta plait domain superfamily;Nucleotide-binding alpha-beta plait domain superfamily;Nucleotide-binding alpha-beta plait doma…	PF00076 (PFAM);G3DSA:3.30.70.330 (GENE3D);G3DSA:3.30.70.330 (GENE3D);G3DSA:3.30.70.330 (GENE3D);mobidb-lite (MOBIDB_LITE);mobidb-lite (MOBIDB_LITE);PTHR23003 (PANTHER);PTHR23003:SF3 (PANTHER);PS50102 (PROSITE_PROFILES);PS50102 (PROSITE_PROFILES);PS50102 (PROSITE_PROFILES);cd00590 (CDD);SSF54928 (SUPERFAMILY);SSF54928 (SUPERFAMILY)	nucleic acid binding;nucleic acid binding;nucleic acid binding;nucleic acid binding;nucleic acid binding;nucleic acid binding
MSTRG.116.2	RNA recognition motif domain containing protein	MSRGGRTDNGSARKRRNDRSRSRSPQKGDPKRIAGGRDGDRRSGANDRMVFITNLAYEVRWVELKDILREHGGEVVFVELLEDRNGHPKGNAIAEFKTKEGATNCIKNLDGFEIRKRKIITKLIRDPVAFLRKVQEETGIDYLAKCGGSWLSRGRGDERPARTGSFDLFGLSPEFLRQHNIEPPLCDRVFIANLSFNVGTGRIYEIFGLAGNIVWMDLHMDKEGKSKGVCILQFSHPIEAVQAISMFHGQKLYDRVLVVKMDRYEKNEPAREGALPRGLEGIRGDASVPVAPVAPVTAQPTQFPSFGMNSGVISGGTAFQSTPYSLTSHISNGQSFGGLGSAVGAFSSALGGFEGRREDSYAGADSRRDDTQFGMNFNVSRVVIIRNLPPDYTWQIVRD…	451	20	0	0.7871	NBR_LOCUS22467;ACOC_LOCUS135;sup-46;Cni-C25A1.4;Acey_s0017.g3477;NECAME_04382;FL82_23180;ANCCEY_07254;sup-46;Acey_s0017.g3477;Acey_s0017.g3477;Acey_s0017.g3477;sup-46;CAEBREN_19066;sup-46;Acey_s0017.g3477;Acey_s0017.g3477;sup-46;CAEBREN_19066;ANCCEY_07254;Acey_s0017.g3477;sup-46;FL82_23180;DICVIV_09011;NBR_LOCUS22467;sup-46;CRE_23966;Acey_s0017.g3477;ANCDUO_23159;Acey_s0017.g3477;sup-46;CRE_23966…	GO:0005515-IPI;GO:0003723-IEA;GO:0005737-IBA;GO:0071014-IBA;GO:2000815-IBA;GO:0003729-IBA;GO:1990904-IBA;GO:0005634-IBA;GO:0003676-IEA	protein binding-IPI;RNA binding-IEA;cytoplasm-IBA;post-mRNA release spliceosomal complex-IBA;regulation of mRNA stability involved in response to oxidative stress-IBA;mRNA binding-IBA;ribonucleoprotein complex-IBA;nucleus-IBA;nucleic acid binding-IEA	4	GO:0003723;GO:0005515;GO:0005634;GO:1990904	RNA binding;protein binding;nucleus;ribonucleoprotein complex	-	-	IPR012677;IPR012677;IPR000504;IPR012677;IPR000504;IPR000504;IPR000504;IPR035979;IPR035979	HOMOLOGOUS_SUPERFAMILY;HOMOLOGOUS_SUPERFAMILY;DOMAIN;HOMOLOGOUS_SUPERFAMILY;HOMOLOGOUS_SUPERFAMILY;HOMOLOGOUS_SUPERFAMILY;HOMOLOGOUS_SUPERFAMILY;HOMOLOGOUS_SUPERFAMILY;DOMAIN;DOMAIN;DOMAIN;DOMAIN;HOMOLOGOUS_SUPERFAMILY;HOMOLOGOUS_SUPERFAMILY	Nucleotide-binding alpha-beta plait domain superfamily;Nucleotide-binding alpha-beta plait domain superfamily;RNA recognition motif domain;Nucleotide-binding alpha-beta plait domain superfamily;Nucleotide-binding alpha-beta plait domain superfamily;Nucleotide-binding alpha-beta plait domain superfamily;Nucleotide-binding alpha-beta plait domain superfamily;Nucleotide-binding alpha-beta plait doma…	G3DSA:3.30.70.330 (GENE3D);G3DSA:3.30.70.330 (GENE3D);PF00076 (PFAM);G3DSA:3.30.70.330 (GENE3D);mobidb-lite (MOBIDB_LITE);mobidb-lite (MOBIDB_LITE);PTHR23003:SF3 (PANTHER);PTHR23003 (PANTHER);PS50102 (PROSITE_PROFILES);PS50102 (PROSITE_PROFILES);PS50102 (PROSITE_PROFILES);cd00590 (CDD);SSF54928 (SUPERFAMILY);SSF54928 (SUPERFAMILY)	;nucleic acid binding;nucleic acid binding;nucleic acid binding;nucleic acid binding;nucleic acid binding;nucleic acid binding
transcript_ACOC_0000013401-mRNA-1	RNA recognition motif domain containing protein	MSRGGRTDNGSARKRRNDRSRSRSPQKGDPKRIAGGRDGDRRSGANDRMVFITNLAYEVRWVELKDILREHGGEVVFVELLEDRNGHPKGNAIAEFKTKEGATNCIKNLDGFEIRKRKIITKLIRDPVAFLRKVQEETGIDYLAKCGGSWLSRGRGDERPARTGSFDLFGLSPEFLRQHNIEPPLCDRVFIANLSFNVGTGRIYEIFGLAGNIVWMDLHMDKEGKSKGVCILQFSHPIEAVQAISMFHGQKLYDRVLVVKMDRYEKNEPAREGALPRGLEGIGAGLGANGAPLTDIASVVAGIRGDASVPVAPVAPVTAQPTQVYLKLKTWVFQLKFPSFGMNSGVISGGTAFQSTPFGGLGGSLCGEVFTVVKMILPPDYTWQIVRDRVQQFGDAESV…	440	20	0	0.7812	NBR_LOCUS22467;ACOC_LOCUS135;sup-46;Acey_s0017.g3477;NECAME_04382;FL82_23180;ANCCEY_07254;sup-46;Acey_s0017.g3477;Acey_s0017.g3477;Acey_s0017.g3477;sup-46;CAEBREN_19066;sup-46;FL83_18870;Acey_s0017.g3477;Acey_s0017.g3477;sup-46;CAEBREN_19066;FL83_18870;ANCCEY_07254;Acey_s0017.g3477;sup-46;FL82_23180;DICVIV_09011;NBR_LOCUS22467;sup-46;CRE_23966;Acey_s0017.g3477;ANCDUO_23159;Acey_s0017.g3477;sup-46…	GO:0005515-IPI;GO:0003723-IEA;GO:0005737-IBA;GO:0071014-IBA;GO:2000815-IBA;GO:0003729-IBA;GO:1990904-IBA;GO:0005634-IBA;GO:0003676-IEA	protein binding-IPI;RNA binding-IEA;cytoplasm-IBA;post-mRNA release spliceosomal complex-IBA;regulation of mRNA stability involved in response to oxidative stress-IBA;mRNA binding-IBA;ribonucleoprotein complex-IBA;nucleus-IBA;nucleic acid binding-IEA	4	GO:0003723;GO:0005515;GO:0005634;GO:1990904	RNA binding;protein binding;nucleus;ribonucleoprotein complex	-	-	IPR012677;IPR000504;IPR012677;IPR012677;IPR000504;IPR000504;IPR000504;IPR035979;IPR035979	HOMOLOGOUS_SUPERFAMILY;DOMAIN;HOMOLOGOUS_SUPERFAMILY;HOMOLOGOUS_SUPERFAMILY;HOMOLOGOUS_SUPERFAMILY;HOMOLOGOUS_SUPERFAMILY;HOMOLOGOUS_SUPERFAMILY;HOMOLOGOUS_SUPERFAMILY;DOMAIN;DOMAIN;DOMAIN;DOMAIN;HOMOLOGOUS_SUPERFAMILY;HOMOLOGOUS_SUPERFAMILY	Nucleotide-binding alpha-beta plait domain superfamily;RNA recognition motif domain;Nucleotide-binding alpha-beta plait domain superfamily;Nucleotide-binding alpha-beta plait domain superfamily;Nucleotide-binding alpha-beta plait domain superfamily;Nucleotide-binding alpha-beta plait domain superfamily;Nucleotide-binding alpha-beta plait domain superfamily;Nucleotide-binding alpha-beta plait doma…	G3DSA:3.30.70.330 (GENE3D);PF00076 (PFAM);G3DSA:3.30.70.330 (GENE3D);G3DSA:3.30.70.330 (GENE3D);mobidb-lite (MOBIDB_LITE);mobidb-lite (MOBIDB_LITE);PTHR23003:SF3 (PANTHER);PTHR23003 (PANTHER);PS50102 (PROSITE_PROFILES);PS50102 (PROSITE_PROFILES);PS50102 (PROSITE_PROFILES);cd00590 (CDD);SSF54928 (SUPERFAMILY);SSF54928 (SUPERFAMILY)	;nucleic acid binding;nucleic acid binding;nucleic acid binding;nucleic acid binding;nucleic acid binding;nucleic acid binding
MSTRG.117.1	Taxilin domain containing protein	MAYMKSQCNNANMENKSSLDPFSLRTRRARRSVKRVFVRCLQRVASQEMMSMVFSDDEDVSTHAAALEQVHTSILSKPQSPAANEINGKENLSRSVFKNDPVSLRVLADKNRSPGDVFITPMVTPSKLHDVYELPSDSDPEEISSVQPVSCTFANRHSDSEGSTLRGLTENISPLKFSTPRLSHRRSAIQPSQSDDDVEYTPKTRTYDHESSSGERTVFTMRLRPRRGLWVPEDDLPLAELKPRPSTIIRNKPDGIFNENSQEMKPVANDLNHLKSPSSLFCSILKTELMEIRGHLTSAKGSSLDNGTNQELVLTPCAEAKSREGTRRNKKSRLDDDYRGPDDDVLLIEIKQRRSTLRSSRKDMSRGQYRSLSKYLFVYLILFLSFSSGLFFILSRIIL…	745	20	0	0.8442	TELCIR_17982;ANCDUO_04480;ANCCEY_13483;CAEBREN_25762;TELCIR_17788;NBR_LOCUS872;HPBE_LOCUS24842;WR25_18249;NECAME_04379;ANCCAN_24180;WR25_08140;Acey_s0669.g1357;OESDEN_02312;DICVIV_09010;CRE_14921;CBG08254	GO:0019905-IEA	syntaxin binding-IEA	1	GO:0019905	syntaxin binding	-	-	IPR026183;IPR026183	FAMILY;FAMILY;FAMILY;FAMILY;FAMILY;FAMILY	Taxilin family;Taxilin family;Taxilin family;Taxilin family;Taxilin family;Taxilin family	PF09728 (PFAM);mobidb-lite (MOBIDB_LITE);mobidb-lite (MOBIDB_LITE);mobidb-lite (MOBIDB_LITE);PTHR16127:SF13 (PANTHER);PTHR16127 (PANTHER)	syntaxin binding;syntaxin binding
transcript_ACOC_0000013601-mRNA-1	MORN repeat protein	MNGGRFDFDDGGTYVGGWEEGKAHGHGVCSGPQGKGEYAGAWHYGFEVSGAYYWPSGNTYHGQWQNGKRHGLGVEQRGRWTYKGEWTQGQKGRYGVRNSATSQARYQGTWSGGYHDGYGTEIYVDGGNYQGQWLRGLRHGYGTRRSAPFGQAAKLRPKSQTHASLTSLRSGRGQHLLFYPNSLHHNGRSGFVLKANSNAPARRRRSLSERSLAVKRTLLSGLRIKKQHSTGDIHQRVTSMTGSLRSSGSTMSCTSEDSLHHHHHKAFVSAEFYSGEWKNDTRSGFGVCERSDGLRYQGEWTNNTKNGYGATTLRDGTREEGKYKNNVLVASSRRKGMLFVRSNKLKERVEAAVETAIRAASIAQQKADIAVSRTSTAKERAEQAMFVAKQARDDAEMAK…	670	20	0	0.7417	FL81_19224;jp;NECAME_04377;FL81_19224;jph-1;jph-1;jph-1;FL82_08918;NECAME_04377;EVEC_LOCUS11624;jp;jph-1;NECAME_04377;CAEBREN_15885;ACOC_LOCUS137;Cre-jph-1;Cre-jph-1;jph-1;GCK72_000407;jph-1;jp;CAEBREN_15885;FL83_10842;Cni-jph-1;Cni-jph-1;jph-1;jph-1;Cre-jph-1;CAEBREN_15885;jph-1;jph-1;jph-1;jph-1;FL83_10842;Acey_s0669.g1364;jph-1;DME_LOCUS8;Cni-jph-1;jph-1;FL83_10842;jph-1;DME_LOCUS8;Acey_s0669.…	GO:0005789-IBA;GO:0006936-TAS;GO:1901076-IMP;GO:0016020-IEA;GO:0040011-IMP;GO:0016021-IEA;GO:0005198-TAS;GO:0030314-IBA;GO:0030314-IEA;GO:0005886-TAS;GO:0005886-IBA	endoplasmic reticulum membrane-IBA;muscle contraction-TAS;positive regulation of engulfment of apoptotic cell-IMP;membrane-IEA;locomotion-IMP;integral component of membrane-IEA;structural molecule activity-TAS;junctional membrane complex-IBA;junctional membrane complex-IEA;plasma membrane-TAS;plasma membrane-IBA	8	GO:0005198;GO:0005789;GO:0005886;GO:0006936;GO:0016021;GO:0030314;GO:0040011;GO:1901076	structural molecule activity;endoplasmic reticulum membrane;plasma membrane;muscle contraction;integral component of membrane;junctional membrane complex;locomotion;positive regulation of engulfment of apoptotic cell	-	-	IPR003409;IPR017191	DOMAIN;REPEAT;REPEAT;REPEAT;REPEAT;REPEAT;REPEAT;FAMILY;FAMILY;FAMILY	Zinc finger, SWIM-type;MORN motif;MORN motif;MORN motif;MORN motif;MORN motif;MORN motif;Junctophilin;Junctophilin;Junctophilin	G3DSA:2.20.110.10 (GENE3D);PF02493 (PFAM);mobidb-lite (MOBIDB_LITE);mobidb-lite (MOBIDB_LITE);mobidb-lite (MOBIDB_LITE);mobidb-lite (MOBIDB_LITE);PTHR23085:SF16 (PANTHER);PTHR23085 (PANTHER);SSF82185 (SUPERFAMILY);SSF82185 (SUPERFAMILY)	;junctional membrane complex;
MSTRG.119.1	MORN repeat protein	MNGGRFDFDDGGTYVGGWEEGKAHGHGVCSGPQGKGEYAGAWHYGFEVSGAYYWPSGNTYHGQWQNGKRHGLGVEQRGRWTYKGEWTQGQKGRYGVRNSATSQARYQGTWSGGYHDGYGTEIYVDGGNYQGQWLRGLRHGYGTRRSAPFGQAAKLRPKSQTHASLTSLRSGRGADDDDDDDDTKEQQNGRSGFVLKANSNAPARRRRSLSERSLAVKRTLLSGLRIKKQHSTGDIHQRVTRSLRSSGSTMSCTSEDSLHHHHHKAFVSAEEEPIDDGTTEFYSGEWKNDTRSGFGVCERSDGLRYQGEWTNNTKNGYGATTLRDGTREEGKYKNNVLVASSRRKGMLFVRSNKLKERVEAAVETAIRAASIAQQKADIAVSRTSTAKERAEQAMFVAKQ…	796	20	0	0.7607	FL81_19224;jp;NECAME_04377;FL81_19224;jph-1;jph-1;jph-1;FL82_08918;NECAME_04377;jp;jph-1;ASIM_LOCUS12098;NECAME_04377;ACOC_LOCUS137;CAEBREN_15885;Cre-jph-1;Cre-jph-1;ASIM_LOCUS12098;jph-1;GCK72_000407;jph-1;jp;CAEBREN_15885;FL83_10842;Cni-jph-1;Cni-jph-1;jph-1;jph-1;Cre-jph-1;CAEBREN_15885;jph-1;jph-1;jph-1;jph-1;FL83_10842;Acey_s0669.g1364;jph-1;DME_LOCUS8;Cni-jph-1;jph-1;FL83_10842;jph-1;DME_LO…	GO:0005789-IBA;GO:0006936-TAS;GO:1901076-IMP;GO:0016020-IEA;GO:0040011-IMP;GO:0016021-IEA;GO:0005198-TAS;GO:0030314-IBA;GO:0030314-IEA;GO:0005886-TAS;GO:0005886-IBA	endoplasmic reticulum membrane-IBA;muscle contraction-TAS;positive regulation of engulfment of apoptotic cell-IMP;membrane-IEA;locomotion-IMP;integral component of membrane-IEA;structural molecule activity-TAS;junctional membrane complex-IBA;junctional membrane complex-IEA;plasma membrane-TAS;plasma membrane-IBA	8	GO:0005198;GO:0005789;GO:0005886;GO:0006936;GO:0016021;GO:0030314;GO:0040011;GO:1901076	structural molecule activity;endoplasmic reticulum membrane;plasma membrane;muscle contraction;integral component of membrane;junctional membrane complex;locomotion;positive regulation of engulfment of apoptotic cell	-	-	IPR003409;IPR017191;IPR017191	HOMOLOGOUS_SUPERFAMILY;REPEAT;REPEAT;REPEAT;REPEAT;REPEAT;REPEAT;REPEAT;REPEAT;REPEAT;FAMILY;FAMILY;FAMILY;FAMILY;FAMILY	Profilin superfamily;MORN motif;MORN motif;MORN motif;MORN motif;MORN motif;MORN motif;MORN motif;MORN motif;MORN motif;Junctophilin;Junctophilin;Junctophilin;Junctophilin;Junctophilin	G3DSA:2.20.110.10 (GENE3D);PF02493 (PFAM);mobidb-lite (MOBIDB_LITE);mobidb-lite (MOBIDB_LITE);mobidb-lite (MOBIDB_LITE);mobidb-lite (MOBIDB_LITE);mobidb-lite (MOBIDB_LITE);mobidb-lite (MOBIDB_LITE);mobidb-lite (MOBIDB_LITE);mobidb-lite (MOBIDB_LITE);PTHR23085 (PANTHER);PTHR23085:SF16 (PANTHER);PTHR23085 (PANTHER);SSF82185 (SUPERFAMILY);SSF82185 (SUPERFAMILY)	;junctional membrane complex;junctional membrane complex;
MSTRG.119.2	MORN repeat protein	MNGGRFDFDDGGTYVGGWEEGKAHGHGVCSGPQGKGEYAGAWHYGFEVSGAYYWPSGNTYHGQWQNGKRHGLGVEQRGRWTYKGEWTQGQKGRYGVRNSATSQARYQGTWSGGYHDGYGTEIYVDGGNYQGQWLRGLRHGYGTRRSAPFGQAAKLRPKSQTHASLTSLRSGRGADDDDDDDDTKEQQNGRSGFVLKANSNAPARRRRSLSERSLAVKRTLLSGLRIKKQHSTGDIHQRVTSMTGSLRSSGSTMSCTSEDSLHHHHHKAFVSAEEEPIDDGTTEFYSGEWKNDTRSGFGVCERSDGLRYQGEWTNNTKNGYGATTLRDGTREEGKYKNNVLVASSRRKGMLFVRSNKLKERVEAAVETAIRAASIAQQKADIAVSRTSTAKERAEQAMFV…	799	20	0	0.7646	FL81_19224;jp;NECAME_04377;FL81_19224;jph-1;jph-1;jph-1;FL82_08918;NECAME_04377;jp;jph-1;ASIM_LOCUS12098;NECAME_04377;ACOC_LOCUS137;CAEBREN_15885;Cre-jph-1;Cre-jph-1;ASIM_LOCUS12098;jph-1;GCK72_000407;jph-1;jp;CAEBREN_15885;FL83_10842;Cni-jph-1;Cni-jph-1;jph-1;jph-1;Cre-jph-1;CAEBREN_15885;jph-1;jph-1;jph-1;jph-1;FL83_10842;Acey_s0669.g1364;jph-1;DME_LOCUS8;Cni-jph-1;jph-1;FL83_10842;jph-1;DME_LO…	GO:0005789-IBA;GO:0006936-TAS;GO:1901076-IMP;GO:0016020-IEA;GO:0040011-IMP;GO:0016021-IEA;GO:0005198-TAS;GO:0030314-IBA;GO:0030314-IEA;GO:0005886-TAS;GO:0005886-IBA	endoplasmic reticulum membrane-IBA;muscle contraction-TAS;positive regulation of engulfment of apoptotic cell-IMP;membrane-IEA;locomotion-IMP;integral component of membrane-IEA;structural molecule activity-TAS;junctional membrane complex-IBA;junctional membrane complex-IEA;plasma membrane-TAS;plasma membrane-IBA	8	GO:0005198;GO:0005789;GO:0005886;GO:0006936;GO:0016021;GO:0030314;GO:0040011;GO:1901076	structural molecule activity;endoplasmic reticulum membrane;plasma membrane;muscle contraction;integral component of membrane;junctional membrane complex;locomotion;positive regulation of engulfment of apoptotic cell	-	-	IPR003409;IPR017191;IPR017191	REPEAT;REPEAT;REPEAT;REPEAT;REPEAT;REPEAT;REPEAT;REPEAT;REPEAT;REPEAT;REPEAT;FAMILY;FAMILY;FAMILY;FAMILY;FAMILY	MORN motif;MORN motif;MORN motif;MORN motif;MORN motif;MORN motif;MORN motif;MORN motif;MORN motif;MORN motif;MORN motif;Junctophilin;Junctophilin;Junctophilin;Junctophilin;Junctophilin	PF02493 (PFAM);G3DSA:2.20.110.10 (GENE3D);mobidb-lite (MOBIDB_LITE);mobidb-lite (MOBIDB_LITE);mobidb-lite (MOBIDB_LITE);mobidb-lite (MOBIDB_LITE);mobidb-lite (MOBIDB_LITE);mobidb-lite (MOBIDB_LITE);mobidb-lite (MOBIDB_LITE);mobidb-lite (MOBIDB_LITE);PTHR23085:SF16 (PANTHER);PTHR23085 (PANTHER);PTHR23085:SF16 (PANTHER);PTHR23085 (PANTHER);SSF82185 (SUPERFAMILY);SSF82185 (SUPERFAMILY)	;junctional membrane complex;junctional membrane complex;
MSTRG.119.3	MORN repeat protein	MNGGRFDFDDGGTYVGGWEEGKAHGHGVCSGPQGKGEYAGAWHYGFEVSGAYYWPSGNTYHGQWQNGKRHGLGVEQRGRWTYKGEWTQGQKGRYGVRNSATSQARYQGTWSGGYHDGYGTEIYVDGGNYQGQWLRGLRHGYGTRRSAPFGQAAKLRPKSQTHASLTSLRSGRGADDDDDDDDTKEQQNGRSGFVLKANSNAPARRRRSLSERSLAVKRTLLSGLRIKKQHSTGDIHQRVTSMTGSLRSSGSTMSCTSEDSLHHHHHKAFVSAEEEPIDDGTTEFYSGEWKNDTRSGFGVCERSDGLRYQGEWTNNTKNGYGATTLRDGTREEGKYKNNVLVASSRRKGMLFVRSNKLKERVEAAVETAIRAASIAQQKADIAVSRTSTAKERAEQAMFV…	812	20	0	0.7606	FL81_19224;jp;NECAME_04377;FL81_19224;jph-1;jph-1;jph-1;FL82_08918;NECAME_04377;jp;jph-1;ASIM_LOCUS12098;NECAME_04377;ACOC_LOCUS137;CAEBREN_15885;Cre-jph-1;Cre-jph-1;ASIM_LOCUS12098;jph-1;GCK72_000407;jph-1;jp;CAEBREN_15885;FL83_10842;Cni-jph-1;Cni-jph-1;jph-1;jph-1;Cre-jph-1;CAEBREN_15885;jph-1;jph-1;jph-1;jph-1;FL83_10842;Acey_s0669.g1364;jph-1;DME_LOCUS8;Cni-jph-1;jph-1;FL83_10842;jph-1;DME_LO…	GO:0005789-IBA;GO:0006936-TAS;GO:1901076-IMP;GO:0016020-IEA;GO:0040011-IMP;GO:0016021-IEA;GO:0005198-TAS;GO:0030314-IBA;GO:0030314-IEA;GO:0005886-TAS;GO:0005886-IBA	endoplasmic reticulum membrane-IBA;muscle contraction-TAS;positive regulation of engulfment of apoptotic cell-IMP;membrane-IEA;locomotion-IMP;integral component of membrane-IEA;structural molecule activity-TAS;junctional membrane complex-IBA;junctional membrane complex-IEA;plasma membrane-TAS;plasma membrane-IBA	8	GO:0005198;GO:0005789;GO:0005886;GO:0006936;GO:0016021;GO:0030314;GO:0040011;GO:1901076	structural molecule activity;endoplasmic reticulum membrane;plasma membrane;muscle contraction;integral component of membrane;junctional membrane complex;locomotion;positive regulation of engulfment of apoptotic cell	-	-	IPR003409;IPR017191;IPR017191	REPEAT;REPEAT;REPEAT;REPEAT;REPEAT;REPEAT;REPEAT;REPEAT;REPEAT;REPEAT;REPEAT;REPEAT;FAMILY;FAMILY;FAMILY;FAMILY	MORN motif;MORN motif;MORN motif;MORN motif;MORN motif;MORN motif;MORN motif;MORN motif;MORN motif;MORN motif;MORN motif;MORN motif;Junctophilin;Junctophilin;Junctophilin;Junctophilin	PF02493 (PFAM);G3DSA:2.20.110.10 (GENE3D);mobidb-lite (MOBIDB_LITE);mobidb-lite (MOBIDB_LITE);mobidb-lite (MOBIDB_LITE);mobidb-lite (MOBIDB_LITE);mobidb-lite (MOBIDB_LITE);mobidb-lite (MOBIDB_LITE);mobidb-lite (MOBIDB_LITE);mobidb-lite (MOBIDB_LITE);PTHR23085:SF16 (PANTHER);PTHR23085:SF16 (PANTHER);PTHR23085 (PANTHER);PTHR23085 (PANTHER);SSF82185 (SUPERFAMILY);SSF82185 (SUPERFAMILY)	;junctional membrane complex;junctional membrane complex;
MSTRG.120.1	ubiquitin family protein	MTKSLARKETNKRKTLFRNEAMDAAVALPSDDITFEQAWIIHKLDCLGCLLHDMHNPKPTNCRDNPYCIKRLGLEKFERLIKAEKLNSAKVEESQKRRDILEVPCGLTNSGNFCYVNSFLQVWYNDPIFRQIIFDWRPSSDYVRPPPPAMDVEAVMNSLQHLFYTMQTTPFEDTDDNRHFTAALRLGNEQQDAQEFSLVLFDALDRNLAKHPHGEVIRQRIRERYLGSSTQRIWCTCGKESSRSSPFSALQLNIDGYKTLHEVLDAYFGEELLEDYLCDECSRRGYVKRQTIPEKLPPVIMLQLNRYVFDANGRNRKLKTPIVYPRELSARSFHLGVSKYDDFDYELFAVMIHEGDNTFCGHYYDLVRHPFTGVWYKYNDEHVEPLSRPPGVERSKSIP…	1247	20	0	0.7442	ANCCAN_20627;ANCCEY_02017;HPBE_LOCUS12766;HPLM_LOCUS13963;ANCCEY_02017;DME_LOCUS7623;ACOC_LOCUS138;HPLM_LOCUS13963;ANCCEY_02017;Acey_s0086.g1974;DME_LOCUS7623;NBR_LOCUS1099;WR25_02741;CAEBREN_11655;ANCCEY_02017;PRIPAC_48462;LOAG_06743;ANCCAN_20627;HPBE_LOCUS12766;Acey_s0086.g1974;PRIPAC_48462;NOO_LOCUS3317;NOO_LOCUS3317;HPLM_LOCUS13963;NOO_LOCUS3317;DME_LOCUS7623;CAEBREN_11655;CAEBREN_08447;CAEBR…	GO:0008233-IEA;GO:0016020-IEA;GO:0006508-IEA;GO:0016021-IEA;GO:0008234-IEA;GO:0036459-IEA;GO:0006511-IEA;GO:0016787-IEA;GO:0016579-IEA;GO:0003676-IEA	peptidase activity-IEA;membrane-IEA;proteolysis-IEA;integral component of membrane-IEA;cysteine-type peptidase activity-IEA;thiol-dependent ubiquitin-specific protease activity-IEA;ubiquitin-dependent protein catabolic process-IEA;hydrolase activity-IEA;protein deubiquitination-IEA;nucleic acid binding-IEA	4	GO:0006511;GO:0016021;GO:0016579;GO:0036459	ubiquitin-dependent protein catabolic process;integral component of membrane;protein deubiquitination;thiol-dependent ubiquitin-specific protease activity	EC:3.4.19;EC:3.4.19.12	Acting on peptide bonds (peptidases);Ubiquitinyl hydrolase 1	IPR001394;IPR000626;IPR000626;IPR028889;IPR038765;IPR029071	FAMILY;DOMAIN;DOMAIN;DOMAIN;DOMAIN;DOMAIN;DOMAIN;DOMAIN;DOMAIN;DOMAIN;DOMAIN;DOMAIN;DOMAIN;DOMAIN;DOMAIN;DOMAIN;HOMOLOGOUS_SUPERFAMILY;HOMOLOGOUS_SUPERFAMILY	Neuropeptide-like peptide 36;Peptidase C19, ubiquitin carboxyl-terminal hydrolase;Peptidase C19, ubiquitin carboxyl-terminal hydrolase;Ubiquitin-like domain;Ubiquitin-like domain;Ubiquitin-like domain;Ubiquitin-like domain;Ubiquitin-like domain;Ubiquitin-like domain;Ubiquitin-like domain;Ubiquitin-like domain;Ubiquitin-like domain;Ubiquitin-like domain;Ubiquitin-like domain;Ubiquitin specific pro…	G3DSA:3.10.20.90 (GENE3D);PF00443 (PFAM);G3DSA:3.90.70.10 (GENE3D);PF00240 (PFAM);mobidb-lite (MOBIDB_LITE);mobidb-lite (MOBIDB_LITE);mobidb-lite (MOBIDB_LITE);mobidb-lite (MOBIDB_LITE);mobidb-lite (MOBIDB_LITE);mobidb-lite (MOBIDB_LITE);mobidb-lite (MOBIDB_LITE);PTHR21646 (PANTHER);PTHR21646:SF23 (PANTHER);PS50053 (PROSITE_PROFILES);PS50235 (PROSITE_PROFILES);cd01795 (CDD);SSF54001 (SUPERFAMILY)…	;protein deubiquitination/thiol-dependent ubiquitin-specific protease activity;protein binding;protein binding;
transcript_ACOC_0000013701-mRNA-1	ubiquitin family protein	MTKSLARKETNKRKTLFRNEAMDAAVALPSDDITFEQAWIIHKLDCLGCLLHDMHNPKPTNCRDNPYCIKRLGLEKFERLIKAEKLNSAKVEESQKRRDILEVPCGLTNSGNFCYVNSFLQVWYNDPIFRQIIFDWRPSSDYVRPPPPAMDVEAVMNSLQHLFYTMQTTPFEDTDDNRHFTAALRLGNEQQDAQEFSLVLFDALDRNLAKHPHGEVIRQRIRERGLQLSGFGVHADYLCDECSRRGYVKRQTIPEKLPPVIMLQLNRYVFDANGRNRKLKTPIVYPRELSARSFHLGVSKYDDFDYELFAVMIHEGDNTFCGHYYDLVRHPFTGVWYKYNDEHVEPLSRPPGVERSKSIPGGRPTPDMKACYGLAYRVREANMPDIVMPPNEITEIWAT…	1217	20	0	0.716	ANCCAN_20627;ANCCEY_02017;HPBE_LOCUS12766;HPLM_LOCUS13963;ANCCEY_02017;ACOC_LOCUS138;HPLM_LOCUS13963;ANCCEY_02017;Acey_s0086.g1974;NBR_LOCUS1099;WR25_02741;CAEBREN_11655;PRIPAC_48462;ANCCEY_02017;ANCCAN_20627;HPBE_LOCUS12766;Acey_s0086.g1974;PRIPAC_48462;Cni-usp-48;NOO_LOCUS3317;Cni-usp-48;NOO_LOCUS3317;HPLM_LOCUS13963;NOO_LOCUS3317;CAEBREN_11655;CAEBREN_08447;CAEBREN_11655;ANCCEY_02017;NAV_LOCUS…	GO:0008233-IEA;GO:0016020-IEA;GO:0006508-IEA;GO:0016021-IEA;GO:0008234-IEA;GO:0036459-IEA;GO:0006511-IEA;GO:0016787-IEA;GO:0016579-IEA;GO:0003676-IEA	peptidase activity-IEA;membrane-IEA;proteolysis-IEA;integral component of membrane-IEA;cysteine-type peptidase activity-IEA;thiol-dependent ubiquitin-specific protease activity-IEA;ubiquitin-dependent protein catabolic process-IEA;hydrolase activity-IEA;protein deubiquitination-IEA;nucleic acid binding-IEA	4	GO:0006511;GO:0016020;GO:0016579;GO:0036459	ubiquitin-dependent protein catabolic process;membrane;protein deubiquitination;thiol-dependent ubiquitin-specific protease activity	EC:3.4.19;EC:3.4.19.12	Acting on peptide bonds (peptidases);Ubiquitinyl hydrolase 1	IPR000626;IPR001394;IPR028889;IPR000626;IPR029071;IPR038765	HOMOLOGOUS_SUPERFAMILY;DOMAIN;DOMAIN;DOMAIN;DOMAIN;DOMAIN;DOMAIN;DOMAIN;DOMAIN;DOMAIN;DOMAIN;DOMAIN;DOMAIN;DOMAIN;HOMOLOGOUS_SUPERFAMILY;HOMOLOGOUS_SUPERFAMILY	Immunoglobulin-like domain superfamily;Ubiquitin-like domain;Ubiquitin-like domain;Ubiquitin-like domain;Peptidase C19, ubiquitin carboxyl-terminal hydrolase;Peptidase C19, ubiquitin carboxyl-terminal hydrolase;Peptidase C19, ubiquitin carboxyl-terminal hydrolase;Peptidase C19, ubiquitin carboxyl-terminal hydrolase;Peptidase C19, ubiquitin carboxyl-terminal hydrolase;Peptidase C19, ubiquitin carb…	G3DSA:3.90.70.10 (GENE3D);PF00240 (PFAM);G3DSA:3.10.20.90 (GENE3D);G3DSA:3.90.70.10 (GENE3D);PF00443 (PFAM);mobidb-lite (MOBIDB_LITE);mobidb-lite (MOBIDB_LITE);mobidb-lite (MOBIDB_LITE);mobidb-lite (MOBIDB_LITE);mobidb-lite (MOBIDB_LITE);PTHR24006 (PANTHER);PS50235 (PROSITE_PROFILES);PS50053 (PROSITE_PROFILES);cd01795 (CDD);SSF54236 (SUPERFAMILY);SSF54001 (SUPERFAMILY)	;protein binding;protein deubiquitination/thiol-dependent ubiquitin-specific protease activity;protein binding;
MSTRG.121.1	TspO/MBR family protein	MYGFFSREDWKEYVANEKMLFWTSQDTRNALLSTMIPGGAAVAAFTVFVKDKEVVHWWTTKIKKPNWAPRDVRLYSVMDILTLSPLGYASYLVYKNGGGFDYTDTRLALGIYGTNMVLALATIPLIKKKNLSCLWKNTALVHLTAAGAAYTFYKIDKEAGLWMIPYAIWTAFYAYLTYSVDRENKVNLMSFVYNKEESIENDDIWDDTELIKMYDEAVSATYSKLGVSSASNGWSVGDSCLARYNEDNLFYPAKVLEIRSEESTRPEYLVLYEGYGDTDWVSSNDLLPATPYDDLQENGDVTMNSAVNETPTRMKIERTTKTAKGRAYRKNSEFSDRVSSRPHPTIPLLAPPPPSVHAGISVPDEGEALSSMLMSWYMSGYHTGYYQAIKDMNSNRNAY…	408	20	1.1e-147	0.8574	ACOC_LOCUS139;CAEBREN_00828;ANCCAN_20626;ANCCAN_20626;CAEBREN_00828;CAEBREN_16360;TSPO;ANCCAN_20626;ANCCAN_20626;GCK72_000461;HPLM_LOCUS17408;Cni-C41G7.9;NOO_LOCUS4558;NOO_LOCUS4558;ANCCAN_20626;TELCIR_16698;DICVIV_09016;TELCIR_15622;NOO_LOCUS4558;ANCCAN_20626;TSPO;CBG24492;HPLM_LOCUS17408;Cni-C41G7.9;NOO_LOCUS4558;TELCIR_16698;DICVIV_09016;CBG24492;NBR_LOCUS14201;C41G7.9;TELCIR_15622;CBG24492;CB…	GO:0003723-IEA;GO:0005737-IEA;GO:0016020-IEA;GO:0016021-IBA;GO:0016021-IEA;GO:0006397-IEA;GO:0005741-IBA;GO:0005634-IEA	RNA binding-IEA;cytoplasm-IEA;membrane-IEA;integral component of membrane-IBA;integral component of membrane-IEA;mRNA processing-IEA;mitochondrial outer membrane-IBA;nucleus-IEA	2	GO:0005741;GO:0016021	mitochondrial outer membrane;integral component of membrane	-	-	IPR038330;IPR010304;IPR004307;IPR002999;IPR004307	DOMAIN;HOMOLOGOUS_SUPERFAMILY;DOMAIN;DOMAIN;FAMILY;FAMILY;FAMILY;DOMAIN;FAMILY;FAMILY;FAMILY	Zinc finger, FLYWCH-type;TspO/MBR-related superfamily;Survival motor neuron;Survival motor neuron;TspO/MBR-related protein;TspO/MBR-related protein;TspO/MBR-related protein;Tudor domain;TspO/MBR-related protein;TspO/MBR-related protein;TspO/MBR-related protein	G3DSA:2.30.30.140 (GENE3D);G3DSA:1.20.1260.100 (GENE3D);PF06003 (PFAM);G3DSA:3.40.190.10 (GENE3D);PF03073 (PFAM);PTHR13681:SF27 (PANTHER);PTHR13681 (PANTHER);PS50304 (PROSITE_PROFILES);cd15904 (CDD);cd04508 (CDD);SSF63748 (SUPERFAMILY)	;mRNA processing/cytoplasm/nucleus/RNA binding;integral component of membrane;integral component of membrane;
MSTRG.121.2	TspO/MBR family protein	MYGFFSREDWKEYVANEKMLFWTSQDTRNALLSTMIPGGAAVAAFTVFVKDKEVVHWWTTKIKKPNWAPRDVRLYSVMDILTLSPLGYASYLVYKNGGGFDYTDTRLALGIYGTNMVLALATIPLIKKKNLSCLWKNTALVHLTAAGAAYTFYKIDKEAGLWMIPYAIWTAFYAYLTYSVDRENKVNLMSFVYNKEESIENDDIWDDTELIKMYDEAVSATYKVEPGANGSKLGVSSASNGWSVGDSCLARYNEDNLFYPAKVLEIRSEESTRPEYLVLYEGYGDTDWVSSNDLLPATPYDDLQENGDVTMNSAVNETPTRMKIERTTKTAKGRAYRKNSEFSDRVSSRPHPTIPLLAPPPPSVHAGISVPDEGEALSSMLMSWYMSGYHTGYYQAIKD…	416	20	4.1e-146	0.8558	ACOC_LOCUS139;CAEBREN_00828;ANCCAN_20626;ANCCAN_20626;CAEBREN_00828;CAEBREN_16360;TSPO;ANCCAN_20626;ANCCAN_20626;GCK72_000461;HPLM_LOCUS17408;Cni-C41G7.9;NOO_LOCUS4558;NOO_LOCUS4558;ANCCAN_20626;TELCIR_16698;DICVIV_09016;TELCIR_15622;NOO_LOCUS4558;ANCCAN_20626;TSPO;CBG24492;HPLM_LOCUS17408;Cni-C41G7.9;NOO_LOCUS4558;TELCIR_16698;DICVIV_09016;CBG24492;NBR_LOCUS14201;C41G7.9;TELCIR_15622;CBG24492;CB…	GO:0003723-IEA;GO:0005737-IEA;GO:0016020-IEA;GO:0016021-IBA;GO:0016021-IEA;GO:0006397-IEA;GO:0005741-IBA;GO:0005634-IEA	RNA binding-IEA;cytoplasm-IEA;membrane-IEA;integral component of membrane-IBA;integral component of membrane-IEA;mRNA processing-IEA;mitochondrial outer membrane-IBA;nucleus-IEA	2	GO:0005741;GO:0016021	mitochondrial outer membrane;integral component of membrane	-	-	IPR038330;IPR010304;IPR004307;IPR002999;IPR004307	HOMOLOGOUS_SUPERFAMILY;HOMOLOGOUS_SUPERFAMILY;DOMAIN;DOMAIN;FAMILY;FAMILY;FAMILY;DOMAIN;FAMILY;FAMILY;FAMILY	Beta-lactamase/transpeptidase-like;TspO/MBR-related superfamily;Survival motor neuron;Survival motor neuron;TspO/MBR-related protein;TspO/MBR-related protein;TspO/MBR-related protein;Tudor domain;TspO/MBR-related protein;TspO/MBR-related protein;TspO/MBR-related protein	G3DSA:3.40.190.10 (GENE3D);G3DSA:1.20.1260.100 (GENE3D);PF06003 (PFAM);G3DSA:2.30.30.140 (GENE3D);PF03073 (PFAM);PTHR13681 (PANTHER);PTHR13681:SF27 (PANTHER);PS50304 (PROSITE_PROFILES);cd15904 (CDD);cd04508 (CDD);SSF63748 (SUPERFAMILY)	;mRNA processing/cytoplasm/nucleus/RNA binding;integral component of membrane;integral component of membrane;
transcript_ACOC_0000013801-mRNA-1	TspO/MBR family protein	MLFWTSQDTRNALLSTMIPGGAAVAAFTVFVKDKEVVHWWTTKIKKPNWAPRDVRLYSVMDILTLSPLGYASYLVYKNGGGFDYTDTRLALGIYGTNMVLALATIPLIKKKNLSCLWKNTALVHLTAAGAAYTFYKIDKEAGLWMIPYAIWTAFYAYLTYSVDRENKVIKDI	172	20	1.4e-122	0.8871	ACOC_LOCUS139;WR25_07716;CAEBREN_00828;ANCCAN_20626;ANCCAN_20626;NECAME_04389;CAEBREN_00828;CAEBREN_16360;TSPO;ANCCAN_20626;ANCCAN_20626;GCK72_000461;WR25_07716;HPLM_LOCUS17408;Cni-C41G7.9;ANCCAN_20626;TELCIR_16698;DICVIV_09016;TELCIR_15622;FL82_08985;NECAME_04389;ANCCAN_20626;TSPO;CBG24492;HPLM_LOCUS17408;Cni-C41G7.9;TELCIR_16698;DICVIV_09016;CBG24492;FL82_08985;NBR_LOCUS14201;TELCIR_15622;CBG24…	GO:0003723-IEA;GO:0005737-IEA;GO:0016020-IEA;GO:0016021-IBA;GO:0016021-IEA;GO:0006397-IEA;GO:0005741-IBA;GO:0005634-IEA	RNA binding-IEA;cytoplasm-IEA;membrane-IEA;integral component of membrane-IBA;integral component of membrane-IEA;mRNA processing-IEA;mitochondrial outer membrane-IBA;nucleus-IEA	5	GO:0003723;GO:0005634;GO:0005741;GO:0006397;GO:0016021	RNA binding;nucleus;mitochondrial outer membrane;mRNA processing;integral component of membrane	-	-	IPR004307;IPR038330;IPR004307;IPR004307	FAMILY;HOMOLOGOUS_SUPERFAMILY;FAMILY;FAMILY;FAMILY	TspO/MBR-related protein;TspO/MBR-related superfamily;TspO/MBR-related protein;TspO/MBR-related protein;TspO/MBR-related protein	PF03073 (PFAM);G3DSA:1.20.1260.100 (GENE3D);PTHR10057 (PANTHER);PTHR10057:SF0 (PANTHER);cd15904 (CDD)	integral component of membrane;integral component of membrane;integral component of membrane
transcript_ACOC_0000013901-mRNA-1	Tudor domain-containing protein	MLMSWYMSGYHTGYYQVRFLCCDVYSWYLLVLNKKKIEIVYVEIAYCSN	49	20	4.8e-28	0.9543	KP79_PYT14916;KP79_PYT14916;Acey_s0276.g1074;smn-1;smn-1;smn-1;FQN60_017839;ACOC_LOCUS140;ACOC_LOCUS140;smn-1;smn-1;SMN1;Acey_s0276.g1074;smn-1;ACOC_LOCUS140;smn-1;smn-1;CR201_G0016086;CR201_G0016086;Acey_s0276.g1074;Acey_s0276.g1074;CR201_G0016086;ACOC_LOCUS140;Acey_s0276.g1074;B4U79_14029;FQN60_017839;SMN1;FQN60_017839;CK820_G0034203;smn-1;ACOC_LOCUS140;smn-1;SMN1;SMN1;smn-1;Acey_s0276.g1074;SM…	GO:0043050-IMP;GO:0005515-IPI;GO:0005737-IEA;GO:0003723-IEA;GO:0002119-IMP;GO:0016020-IEA;GO:0005829-IDA;GO:0016021-IEA;GO:0016604-IDA;GO:0007281-IMP;GO:0040025-IMP;GO:0040011-IMP;GO:0008340-IMP;GO:0009792-IMP;GO:0006397-IEA;GO:0043621-IPI;GO:0005634-IDA;GO:0005634-IEA	pharyngeal pumping-IMP;protein binding-IPI;cytoplasm-IEA;RNA binding-IEA;nematode larval development-IMP;membrane-IEA;cytosol-IDA;integral component of membrane-IEA;nuclear body-IDA;germ cell development-IMP;vulval development-IMP;locomotion-IMP;determination of adult lifespan-IMP;embryo development ending in birth or egg hatching-IMP;mRNA processing-IEA;protein self-association-IPI;nucleus-IDA;n…	5	GO:0003723;GO:0005634;GO:0005737;GO:0006397;GO:0016021	RNA binding;nucleus;cytoplasm;mRNA processing;integral component of membrane	-	-	IPR010304	DOMAIN	Survival motor neuron	PF06003 (PFAM)	mRNA processing/cytoplasm/nucleus/RNA binding
MSTRG.122.1	Aryl hydrocarbon receptor protein 1	MYASKRRQRNFKRFLTNSKRIGTEEQVREPPKPSTSTNPSKRHRERLNGELETVAALLPYDAATISRLDKLSVLRLAVSYLEVKAHFHACLTSSPFICELPLATHSYAYCPQSLSFSAVPTVYHSQASQALVDPSESDFETIALKSLGGFLLIVNDNGEIYYASENIENFLGFHQSDVLHQSLYDLIHSEDRDDIRQQLNPAYSLPPGSNNPHDLYEQENAQHLERNVNARFRCLLDNTCGFLRIDMRGKLMSLHGLPSSYVLGRSNPGLVMGLITVCTPFVPPSSTDILAEDQILKTKHQLDGTLVSMDEKVHAMLELSESELPISFYSLVNVEDAICLAEAHKEVIKNGSSGLLIYRLVSTKTFRTYFVQSSCRMFYKNGKPESIGLTHRLLNEVEG…	617	20	0	0.8083	ahr-1;FL83_13214;ahr-1;ahr-1;ANCCEY_02022;Acey_s0276.g1078;FL82_08980;ahr-1;Cre-ahr-1;HPLM_LOCUS12679;ANCCEY_02022;ahr-1;ahr-1;Acey_s0276.g1078;ahr-1;FL82_08980;NBR_LOCUS326;FL82_08980;FL83_13214;ahr-1;ANCDUO_22786;Cre-ahr-1;NBR_LOCUS326;FL83_13214;ANCDUO_22786;ahr-1;ACOC_LOCUS141;Cre-ahr-1;Cre-ahr-1;Acey_s0276.g1078;HPLM_LOCUS12679;ANCCEY_02022;NECAME_04391;ahr-1;ANCDUO_22786;ahr-1;HPLM_LOCUS126…	GO:0003677-IDA;GO:0003677-IEA;GO:0005515-IPI;GO:0000122-IBA;GO:0004879-IBA;GO:0046983-IEA;GO:0001085-IPI;GO:0001085-IEA;GO:0006805-IEA;GO:1990837-IBA;GO:0030522-TAS;GO:0030522-IEA;GO:0009410-IDA;GO:0009410-IEA;GO:0040013-IMP;GO:0040013-IEA;GO:0006355-IEA;GO:0007610-IEA;GO:0007399-IEA;GO:0005634-IBA;GO:0005634-IEA;GO:0045944-IBA	DNA binding-IDA;DNA binding-IEA;protein binding-IPI;negative regulation of transcription by RNA polymerase II-IBA;nuclear receptor activity-IBA;protein dimerization activity-IEA;RNA polymerase II transcription factor binding-IPI;RNA polymerase II transcription factor binding-IEA;xenobiotic metabolic process-IEA;sequence-specific double-stranded DNA binding-IBA;intracellular receptor signaling pat…	10	GO:0000122;GO:0001085;GO:0004879;GO:0005634;GO:0006805;GO:0030522;GO:0040013;GO:0045944;GO:0046983;GO:1990837	negative regulation of transcription by RNA polymerase II;RNA polymerase II transcription factor binding;nuclear receptor activity;nucleus;xenobiotic metabolic process;intracellular receptor signaling pathway;negative regulation of locomotion;positive regulation of transcription by RNA polymerase II;protein dimerization activity;sequence-specific double-stranded DNA binding	-	-	IPR036638;IPR013767;IPR039091;IPR011598;IPR000014;IPR011598;IPR000014;IPR035965;IPR036638	HOMOLOGOUS_SUPERFAMILY;HOMOLOGOUS_SUPERFAMILY;DOMAIN;DOMAIN;DOMAIN;DOMAIN;DOMAIN;FAMILY;DOMAIN;DOMAIN;DOMAIN;DOMAIN;HOMOLOGOUS_SUPERFAMILY;HOMOLOGOUS_SUPERFAMILY	Helix-loop-helix DNA-binding domain superfamily;Helix-loop-helix DNA-binding domain superfamily;PAS fold;PAS fold;PAS fold;PAS fold;PAS fold;Aryl hydrocarbon receptor/Aryl hydrocarbon receptor repressor;Myc-type, basic helix-loop-helix (bHLH) domain;PAS domain;Myc-type, basic helix-loop-helix (bHLH) domain;PAS domain;PAS domain superfamily;Helix-loop-helix DNA-binding domain superfamily	G3DSA:4.10.280.10 (GENE3D);PF14598 (PFAM);PF00989 (PFAM);G3DSA:3.30.450.20 (GENE3D);G3DSA:3.30.450.20 (GENE3D);mobidb-lite (MOBIDB_LITE);PTHR10649:SF13 (PANTHER);PTHR10649 (PANTHER);PS50888 (PROSITE_PROFILES);PS50112 (PROSITE_PROFILES);cd00083 (CDD);cd00130 (CDD);SSF55785 (SUPERFAMILY);SSF47459 (SUPERFAMILY)	protein dimerization activity;regulation of transcription, DNA-templated;xenobiotic metabolic process/response to xenobiotic stimulus;protein dimerization activity;protein dimerization activity;protein dimerization activity
MSTRG.123.1	Skp1 family, dimerization domain protein	MGCSQNAGDRSIATVGPDTNRIEVGKFEIIAVSGMVSRSNSTNTTTEKRTSEKLYKLQTKDNEIFEVAASIIGMSKLISTMSEDLNLQDDDTPVPIPNVSANIFKKIVLWCEKHRYVGDDRAGSQNVLEQWDNDFFNIDHPTLFELITAANYLDIPALLEDACRRIARKMRGKTPEEIRKMFNIVNDFTPEEEEQIRKENAWCEE	205	20	1.2e-100	0.6945	DICVIV_09021;K4FTL6;CAEBREN_03973;HPBE_LOCUS26248;ACOC_LOCUS142;ANCCEY_02039;K4FTL6;TELCIR_13918;K4FTL6;K4FTL6;NECAME_14768;106074681;Cnig_chr_IV.g12574	GO:0016310-IEA;GO:0019005-IEA;GO:0016301-IEA;GO:0006511-IEA	phosphorylation-IEA;SCF ubiquitin ligase complex-IEA;kinase activity-IEA;ubiquitin-dependent protein catabolic process-IEA	1	GO:0006511	ubiquitin-dependent protein catabolic process	-	-	IPR016073;IPR016072;IPR036296;IPR011333	DOMAIN;DOMAIN;DOMAIN;DOMAIN;DOMAIN;HOMOLOGOUS_SUPERFAMILY;HOMOLOGOUS_SUPERFAMILY	SKP1 component, POZ domain;SKP1 component, dimerisation;SKP1 component, dimerisation;SKP1 component, dimerisation;SKP1 component, dimerisation;SKP1-like, dimerisation domain superfamily;SKP1/BTB/POZ domain superfamily	PF03931 (PFAM);PF01466 (PFAM);G3DSA:3.30.710.10 (GENE3D);PTHR11165 (PANTHER);cd18322 (CDD);SSF81382 (SUPERFAMILY);SSF54695 (SUPERFAMILY)	ubiquitin-dependent protein catabolic process;ubiquitin-dependent protein catabolic process;ubiquitin-dependent protein catabolic process;
transcript_ACOC_0000014101-mRNA-1	Skp1 family, dimerization domain protein	MVSRSNSTNTTTEKRTSEKLYKLQTKDNEIFEVAASIIGMSKLISTMSEDLNLQDDDTPVPIPNVSANIFKKIVLWCEKHRYVGDDRAGSQNVLEQWDNDFFNIDHPTLFELITGKTPEEIRKMFNIVNDFTPEEEEQIRKENAWCEE	148	20	3.5e-106	0.6341	TELCIR_13918;DICVIV_09021;NECAME_14768;CAEBREN_03973;ANCDUO_12784;ACOC_LOCUS142;106074681;Cnig_chr_IV.g12574;ANCCEY_02039	GO:0006511-IEA	ubiquitin-dependent protein catabolic process-IEA	1	GO:0006511	ubiquitin-dependent protein catabolic process	-	-	IPR016073;IPR016897;IPR016072;IPR011333;IPR036296	DOMAIN;FAMILY;DOMAIN;DOMAIN;DOMAIN;DOMAIN;DOMAIN;HOMOLOGOUS_SUPERFAMILY;HOMOLOGOUS_SUPERFAMILY	SKP1 component, POZ domain;S-phase kinase-associated protein 1;SKP1 component, dimerisation;SKP1 component, dimerisation;SKP1 component, dimerisation;SKP1 component, dimerisation;SKP1 component, dimerisation;SKP1/BTB/POZ domain superfamily;SKP1-like, dimerisation domain superfamily	PF03931 (PFAM);PIRSF028729 (PIRSF);PF01466 (PFAM);G3DSA:3.30.710.10 (GENE3D);G3DSA:3.30.710.10 (GENE3D);PTHR11165 (PANTHER);cd18322 (CDD);SSF54695 (SUPERFAMILY);SSF81382 (SUPERFAMILY)	ubiquitin-dependent protein catabolic process;ubiquitin-dependent protein catabolic process;ubiquitin-dependent protein catabolic process;ubiquitin-dependent protein catabolic process
MSTRG.124.1	Protein CBG12816	MEFATDCVWSFSEMSVVSGSELASEGKSQDTDSGVEKAELRPGGASPTPPCSLDEMFSNRYTTSNHSYAKISEGFDPVICLYPFHSKPKHFERNRPHYGSGGRHPYNKRQRPSWSHH	117	17	1.2e-66	0.6889	SVUK_LOCUS18255;ACOC_LOCUS143;Acey_s0086.g1978;CBG12816;GPUH_LOCUS22498;ANCCAN_30627;ANCCAN_16231;MED4;NECAME_14769;OESDEN_10324;CBG12816;SVUK_LOCUS18255;MED4;Acey_s0086.g1978;OFLC_LOCUS7721;ANCCAN_30627;ANCCAN_16231;OESDEN_10324;OFLC_LOCUS7721;CGOC_LOCUS9734;NECAME_14769;GPUH_LOCUS22498;CGOC_LOCUS9734;MED4;MED4;MED4;GPUH_LOCUS20535;NECAME_14769;MED4;GPUH_LOCUS20535;Acey_s0086.g1978;OFLC_LOCUS772…	GO:0005845-IEA;GO:0003723-IEA;GO:0003712-IEA;GO:0016592-IEA;GO:0016020-IEA;GO:0016021-IEA;GO:0106005-IEA;GO:0005634-IEA;GO:0006357-IEA	mRNA cap binding complex-IEA;RNA binding-IEA;transcription coregulator activity-IEA;mediator complex-IEA;membrane-IEA;integral component of membrane-IEA;RNA 5'-cap (guanine-N7)-methylation-IEA;nucleus-IEA;regulation of transcription by RNA polymerase II-IEA	4	GO:0003723;GO:0005845;GO:0016021;GO:0106005	RNA binding;mRNA cap binding complex;integral component of membrane;RNA 5'-cap (guanine-N7)-methylation	-	-	IPR028271	FAMILY;FAMILY;FAMILY	RNA guanine-N7 methyltransferase activating subunit;RNA guanine-N7 methyltransferase activating subunit;RNA guanine-N7 methyltransferase activating subunit	PF15320 (PFAM);mobidb-lite (MOBIDB_LITE);mobidb-lite (MOBIDB_LITE)	mRNA cap binding complex/RNA binding/RNA 5'-cap (guanine-N7)-methylation;
MSTRG.125.1	Protein CBG12817	MCLSSCPKRKLEAPFPMGIFSHLVTACVGVYGGAYLAQNYEIGKVPSVTELVQQLEKYLQNYKKER	66	20	1.3e-28	0.8154	TELCIR_20002;TELCIR_20002;WR25_07228;WR25_07228	GO:0009058-IEA;GO:0003824-IEA;GO:0016020-IEA;GO:0016021-IEA	biosynthetic process-IEA;catalytic activity-IEA;membrane-IEA;integral component of membrane-IEA	1	GO:0016021	integral component of membrane	-	-	IPR027854	FAMILY	Short transmembrane mitochondrial protein 1	PF15054 (PFAM)	-
transcript_ACOC_0000014301-mRNA-1	Protein CBG12817	MGIFSHLVTACVGVYGGAYLAQNYEIGKVPSVTELVQQLEKYLQNYKKER	50	20	9.9e-29	0.8117	TELCIR_20002;TELCIR_20002;WR25_07228;WR25_07228	GO:0009058-IEA;GO:0003824-IEA;GO:0016020-IEA;GO:0016021-IEA	biosynthetic process-IEA;catalytic activity-IEA;membrane-IEA;integral component of membrane-IEA	1	GO:0016021	integral component of membrane	-	-	IPR027854	FAMILY	Short transmembrane mitochondrial protein 1	PF15054 (PFAM)	-
MSTRG.127.1	Protein CBG03224	MTATDNNTNQCQVMSVDGNAQHSARKDKEKNVESEDWGDDVSIILRNDKTSVGTVILKICFALIFIGLATGALIYAVNNSEEQQNQPSSKFQTLYFPYDITQQCTNGTLAITHRRNCSGEEQKYAFVSYGTTWMQDATKRFLYHRVGLTEDDWQYSYYVLRNITFYATKLHCSRIQKSYDDFLKGMGFTYLRRQRDEEIFLNGRYKEVIAYEGELPENVTIKGHHPNLIRGYSSEQKNATYGWELYFERSLNFSLYKKEYWYPEMQSLSPDWDIFSDIPVSCLHSQMIDHL	291	20	1.8e-127	0.7021	WR25_16180;NBR_LOCUS6098;Cni-C18E9.5;ANCCAN_25459;FL81_07827;CBG03224;FL81_07827;ANCDUO_17155;CRE_01892;FL83_09284;SVUK_LOCUS10313;SVUK_LOCUS10313;CBG03224;CRE_01892;ANCDUO_17155;FL83_09284;ANCCAN_25459;OESDEN_07884;ANCCAN_16388;NECAME_02966;WR25_16180;Cni-C18E9.5;NECAME_02966;ANCCAN_16388;OESDEN_07884;NBR_LOCUS6098	GO:0016020-IEA;GO:0016021-IEA	membrane-IEA;integral component of membrane-IEA	1	GO:0016021	integral component of membrane	-	-	-	HOMOLOGOUS_SUPERFAMILY;HOMOLOGOUS_SUPERFAMILY	SMAD/FHA domain superfamily;SMAD/FHA domain superfamily	mobidb-lite (MOBIDB_LITE);mobidb-lite (MOBIDB_LITE)	;
transcript_ACOC_0000014601-mRNA-1	eukaryotic porin	MSQPTSESTAVPSKPSTNPGSYEELHRKARDIFPTCFEGAKVMISKGLSSHFQVSHTLSISPTSTGYRFGATYVGTKVVGPQEQYPIFLGDTDVAGNTTATVVHQFGDNYRLRLQGQVQQNKLVGAQGTFERRGRLTTLGLTFANTDVVNESGVVVGQLLRKLTNNIDVGTELLYQYGKQIPGQKLSMLSYSLRYTTPIWTAVATLGSSGAHFTYYHKQTDNLSFGVEFESNTNVGEAVGTFAYQAELPDEGVTMRASIDTNWSVGGVFEKRLSQQLPFTFAMSGLFNHAKV	292	20	0	0.9076	FL83_09283;Acey_s0460.g1851;Cre-tomm-40;HPLM_LOCUS20507;tomm-40;tomm-40;DICVIV_11750;ACOC_LOCUS147;tomm-40;DICVIV_11750;Acey_s0460.g1851;Cni-tomm-40;tomm-40;ANCCEY_08652;GCK72_005640;NBR_LOCUS6097;tomm-40;ANCDUO_09468;OESDEN_12862;Cre-tomm-40;TELCIR_10160;tomm-40;tomm-40;GCK72_005640;Cbn-tomm-40;tomm-40;Acey_s0460.g1851;ACOC_LOCUS147;tomm-40;Cbn-tomm-40;tomm-40;HPBE_LOCUS24697;ANCCEY_08652;ANCDUO…	GO:0031966-IDA;GO:0031966-IEA;GO:0006626-ISS;GO:0005739-IEA;GO:0016020-IEA;GO:0016021-IEA;GO:0055085-IEA;GO:0015288-IEA;GO:0030150-IBA;GO:0030150-IMP;GO:0030150-IEA;GO:0008320-IBA;GO:0008320-IEA;GO:0015031-IEA;GO:0046930-IEA;GO:0005742-IBA;GO:0005741-IEA;GO:0006811-IEA	mitochondrial membrane-IDA;mitochondrial membrane-IEA;protein targeting to mitochondrion-ISS;mitochondrion-IEA;membrane-IEA;integral component of membrane-IEA;transmembrane transport-IEA;porin activity-IEA;protein import into mitochondrial matrix-IBA;protein import into mitochondrial matrix-IMP;protein import into mitochondrial matrix-IEA;protein transmembrane transporter activity-IBA;protein tra…	6	GO:0005742;GO:0006811;GO:0008320;GO:0015288;GO:0030150;GO:0046930	mitochondrial outer membrane translocase complex;ion transport;protein transmembrane transporter activity;porin activity;protein import into mitochondrial matrix;pore complex	-	-	IPR023614;IPR027246;IPR037930;IPR037930	HOMOLOGOUS_SUPERFAMILY;FAMILY;FAMILY;FAMILY;FAMILY;FAMILY	Porin domain superfamily;Eukaryotic porin/Tom40;Eukaryotic porin/Tom40;Eukaryotic porin/Tom40;Tom40;Tom40	G3DSA:2.40.160.10 (GENE3D);PF01459 (PFAM);mobidb-lite (MOBIDB_LITE);mobidb-lite (MOBIDB_LITE);PTHR10802 (PANTHER);cd07305 (CDD)	;mitochondrial outer membrane/transmembrane transport;protein transmembrane transporter activity/protein import into mitochondrial matrix/mitochondrial outer membrane;protein transmembrane transporter activity/protein import into mitochondrial matrix/mitochondrial outer membrane
MSTRG.128.1	eukaryotic porin	MSQPTSESTAVPSKPSTNPGSYEELHRKARDIFPTCFEGAKVMISKGLSSHFQVSHTLSISPTSTGYRFGATYVGTKVVGPQEQYPIFLGDTDVAGNTTATVVHQFGDNYRLRLQGQVQQNKLVGAQGTFERRGRLTTLGLTFANTDVVNESGVVVGQLLRKLTNNIDVGTELLYQYGKQIPGQKLSMLSYSLRYTTPIWTAVATLGSSGAHFTYYHKQTDNLSFGVEFESNTNVGEAVGTFAYQAELPDEGVTMRASIDTNWSVGGVFEKRLSQQLPFTFAMSGLFNHAKVAGKFGIGLIIG	303	20	0	0.9082	FL83_09283;Acey_s0460.g1851;Cre-tomm-40;HPLM_LOCUS20507;tomm-40;tomm-40;DICVIV_11750;ACOC_LOCUS147;tomm-40;DICVIV_11750;Acey_s0460.g1851;Cni-tomm-40;tomm-40;ANCCEY_08652;GCK72_005640;NBR_LOCUS6097;tomm-40;ANCDUO_09468;OESDEN_12862;Cre-tomm-40;TELCIR_10160;tomm-40;tomm-40;GCK72_005640;Cbn-tomm-40;tomm-40;Acey_s0460.g1851;ACOC_LOCUS147;tomm-40;Cbn-tomm-40;tomm-40;HPBE_LOCUS24697;ANCCEY_08652;ANCDUO…	GO:0031966-IDA;GO:0031966-IEA;GO:0006626-ISS;GO:0005739-IEA;GO:0016020-IEA;GO:0016021-IEA;GO:0055085-IEA;GO:0015288-IEA;GO:0030150-IBA;GO:0030150-IMP;GO:0030150-IEA;GO:0008320-IBA;GO:0008320-IEA;GO:0015031-IEA;GO:0046930-IEA;GO:0005742-IBA;GO:0005741-IEA;GO:0006811-IEA	mitochondrial membrane-IDA;mitochondrial membrane-IEA;protein targeting to mitochondrion-ISS;mitochondrion-IEA;membrane-IEA;integral component of membrane-IEA;transmembrane transport-IEA;porin activity-IEA;protein import into mitochondrial matrix-IBA;protein import into mitochondrial matrix-IMP;protein import into mitochondrial matrix-IEA;protein transmembrane transporter activity-IBA;protein tra…	6	GO:0005742;GO:0006811;GO:0008320;GO:0015288;GO:0030150;GO:0046930	mitochondrial outer membrane translocase complex;ion transport;protein transmembrane transporter activity;porin activity;protein import into mitochondrial matrix;pore complex	-	-	IPR027246;IPR023614;IPR037930;IPR037930	FAMILY;HOMOLOGOUS_SUPERFAMILY;HOMOLOGOUS_SUPERFAMILY;HOMOLOGOUS_SUPERFAMILY;FAMILY;FAMILY	Eukaryotic porin/Tom40;Porin domain superfamily;Porin domain superfamily;Porin domain superfamily;Tom40;Tom40	PF01459 (PFAM);G3DSA:2.40.160.10 (GENE3D);mobidb-lite (MOBIDB_LITE);mobidb-lite (MOBIDB_LITE);PTHR10802 (PANTHER);cd07305 (CDD)	mitochondrial outer membrane/transmembrane transport;protein transmembrane transporter activity/protein import into mitochondrial matrix/mitochondrial outer membrane;protein transmembrane transporter activity/protein import into mitochondrial matrix/mitochondrial outer membrane
transcript_ACOC_0000014701-mRNA-1	eukaryotic porin	MVIKFTSNVVDPPALLYMGVDKYENEELIKYGWPEDVWFHVDKVSSAHVYLRLPEGMTIDTIPQALIDDCCQLVKANSIDGNKMTDVGIVYTMWGNLKKTGDMAVGQIGFHDSKKVKRCVVQKRINEIVNRLNKTEKKEDIDYRAEREQRDTAVRRLQRKLEQEKKALEMKEAEEREALRRQRHYEDVDWNAQRDSEDGNLSDDFM	206	20	2.6e-152	0.8832	ANCCAN_25471;DICVIV_11750;ANCCAN_25471;WR25_00026;DICVIV_11750;DICVIV_11750;WR25_00026;DICVIV_11750;WR25_00026;WR25_00026	GO:0055085-IEA;GO:0008320-IEA;GO:0030150-IEA;GO:0016020-IEA;GO:0016021-IEA;GO:0005741-IEA	transmembrane transport-IEA;protein transmembrane transporter activity-IEA;protein import into mitochondrial matrix-IEA;membrane-IEA;integral component of membrane-IEA;mitochondrial outer membrane-IEA	4	GO:0005741;GO:0008320;GO:0016021;GO:0030150	mitochondrial outer membrane;protein transmembrane transporter activity;integral component of membrane;protein import into mitochondrial matrix	-	-	IPR008532;IPR039730	DOMAIN;DOMAIN;FAMILY;FAMILY	NFACT, RNA-binding domain;NFACT, RNA-binding domain;Jlp2/Ccd25;Jlp2/Ccd25	PF05670 (PFAM);mobidb-lite (MOBIDB_LITE);PTHR13049 (PANTHER);PTHR13049:SF2 (PANTHER)	;
transcript_ACOC_0000014801-mRNA-1	unnamed protein product	MESAAGYMTTCLLTIQTSVDIVISVFMGPLERMVKNRLMPTDGNIRSRAADTGKVEHYKKKKWQVENFKWEVQ	73	1	1e-48	1	ACOC_LOCUS149;ACOC_LOCUS149	GO:0016020-IEA;GO:0016021-IEA	membrane-IEA;integral component of membrane-IEA	1	GO:0016021	integral component of membrane	-	-	-	-	-	-	-
MSTRG.130.1	B30.2/SPRY domain-containing protein	MEWLRGRMFFGGTSSNDSSGDDEQQRLVVEATTSGIRRRSMMGGKQSTHEDNQAYEVSPVGETCPSRGASISGTISAGMPAPDDRDRPITSHRCKLHYHDGQQRTLSPAHPHAAPCALDDLLRPAKFDFILGSQQLIDRHTQELHAWNPDDRSLNIFVKDDDCFTFHRHPVAQSTDCIRGKMGYTTGFHVWQMEWPQRQRGTHAVVGVATKAAALHAMGYTSLIGTNTESYGWDLTRGECHHDSKNCASWQYPTGVPLRPAYIPIPDKFYCILDMDDGYMAFATDEHYLGVAFRNLQGRTLYPIVSAVWGHCEVTMKYLGGIEPSPRPLMDICRRAIRVEMGRHRLHRVDELRLPPPLKRFILYRK	366	20	0	0.8351	spsb-1;spsb-1;WR25_16367;spsb-1;spsb-1;spsb-1;spsb-1;spsb-1;spsb-1;spsb-1	GO:0043161-IBA;GO:0019005-IBA;GO:0035556-IEA;GO:0006511-IBA	proteasome-mediated ubiquitin-dependent protein catabolic process-IBA;SCF ubiquitin ligase complex-IBA;intracellular signal transduction-IEA;ubiquitin-dependent protein catabolic process-IBA	2	GO:0019005;GO:0043161	SCF ubiquitin ligase complex;proteasome-mediated ubiquitin-dependent protein catabolic process	-	-	IPR003877;IPR043136;IPR001496;IPR001496;IPR001870;IPR013320	DOMAIN;HOMOLOGOUS_SUPERFAMILY;DOMAIN;DOMAIN;DOMAIN;DOMAIN;DOMAIN;DOMAIN;DOMAIN;DOMAIN;DOMAIN;HOMOLOGOUS_SUPERFAMILY	SPRY domain;B30.2/SPRY domain superfamily;SOCS box domain;SOCS box domain;SOCS box domain;SOCS box domain;SOCS box domain;SOCS box domain;SOCS box domain;B30.2/SPRY domain;B30.2/SPRY domain;Concanavalin A-like lectin/glucanase domain superfamily	PF00622 (PFAM);G3DSA:2.60.120.920 (GENE3D);PF07525 (PFAM);G3DSA:1.10.750.20 (GENE3D);mobidb-lite (MOBIDB_LITE);mobidb-lite (MOBIDB_LITE);PTHR12245:SF11 (PANTHER);PTHR12245 (PANTHER);PS50225 (PROSITE_PROFILES);PS50188 (PROSITE_PROFILES);cd12906 (CDD);SSF49899 (SUPERFAMILY)	protein binding;
MSTRG.132.1	unnamed protein product	MADNIVRQLCVEFRKKRVLSGKASDALFEKADAHQKLQQSKFDRYLEVKSKLSKEDIIRLELEKEQQQLLEAEQEMAAAEQSANDVEKRLQTCVAELKSNVSMLRKSELDSSKEQPMREMYQDMLEKLSELHIKSRESQRCSLVNERLVLEEQVSSLSMKTSQIRDEVDRLSADLDATGYEGLLHATRRSAMALMKAKYTGIKNELLRLRLGTHTLRIRARSAQSISALEK	231	18	6.1e-160	0.723	DICVIV_12288;DICVIV_12288	GO:0016020-IEA;GO:0016021-IEA	membrane-IEA;integral component of membrane-IEA	1	GO:0016020	membrane	-	-	-	-	-	-	-
MSTRG.133.1	TIP49 protein	MALVGGVELRNVIRVERVGAHSHIHGLGVASNFDPEDVADGMVGQIRARKAAAIVVKMVQTGNIAGRGVLIYGQPGTGKTAIAMGIAKALGQDTPFVSVSASEIFSVEISKSEALTQAFRKAIGVRIKEETEVLEGEVVSIEMDRPATGVGPKVGKLSLKTTDMETIYDLGSKMVDQCIKLRVCAGDVIQIDKGSGRLTRVGRSATRSHDYDAMGPQTKFVPCPRGEIQTTREVVHTVCLHEIDVINSRSQGFLALFTGDTGEIKSEVREQINKKVAEWREEGKAMIQPGVLFIDEAHLLDLECFSFLNRAMESELSPLLIMATNRDRGVVRGTDVTANYCLPPDLVDRLIGIATKPYTSDEIGRILSLRADEEGVRMEAGALNLLKMIVGETSMRYGM…	454	20	0	0.9227	Bma-ruvb-2;WBA_LOCUS10589;ACOC_LOCUS153;Acey_s0460.g1862;ANCCAN_19150;Acey_s0460.g1862;HPBE_LOCUS14042;ANCCAN_19150;HPBE_LOCUS14042;HPBE_LOCUS14042;Bma-ruvb-2;DICVIV_12289;NECAME_02959;ANCCAN_19150;Bma-ruvb-2;NBR_LOCUS8969;ANCDUO_15074;ANCCAN_19150;Bm1_34895;HPLM_LOCUS6782;HPBE_LOCUS14042;HPBE_LOCUS14042;ANCCAN_19150;Bma-ruvb-2;Bm1_34895;Bma-ruvb-2;Bma-ruvb-2;ANCCAN_19150;Acey_s0460.g1862;HPLM_LO…	GO:0097255-IEA;GO:0000166-IEA;GO:0032508-IEA;GO:0003678-IEA;GO:0005737-IEA;GO:0003723-IEA;GO:0016491-IEA;GO:0055114-IEA;GO:0016787-IEA;GO:0035267-IEA;GO:0031011-IEA;GO:0004386-IEA;GO:0043139-IEA;GO:0005524-IEA;GO:0005634-IEA;GO:0003676-IEA	R2TP complex-IEA;nucleotide binding-IEA;DNA duplex unwinding-IEA;DNA helicase activity-IEA;cytoplasm-IEA;RNA binding-IEA;oxidoreductase activity-IEA;oxidation-reduction process-IEA;hydrolase activity-IEA;NuA4 histone acetyltransferase complex-IEA;Ino80 complex-IEA;helicase activity-IEA;5'-3' DNA helicase activity-IEA;ATP binding-IEA;nucleus-IEA;nucleic acid binding-IEA	10	GO:0003723;GO:0005524;GO:0005737;GO:0016491;GO:0031011;GO:0032508;GO:0035267;GO:0043139;GO:0055114;GO:0097255	RNA binding;ATP binding;cytoplasm;oxidoreductase activity;Ino80 complex;DNA duplex unwinding;NuA4 histone acetyltransferase complex;5'-3' DNA helicase activity;oxidation-reduction process;R2TP complex	EC:3.6.1.3;EC:3.6.4.12;EC:3.6.1.15	Adenosinetriphosphatase;DNA helicase;Nucleoside-triphosphate phosphatase	IPR041048;IPR010339;IPR042487;IPR027238;IPR037942;IPR027417	DOMAIN;DOMAIN;DOMAIN;DOMAIN;HOMOLOGOUS_SUPERFAMILY;FAMILY;FAMILY;FAMILY;FAMILY;HOMOLOGOUS_SUPERFAMILY	RuvB-like, AAA-lid domain;RuvB-like, AAA-lid domain;RuvB-like, AAA-lid domain;TIP49, P-loop domain;RuvB-like helicase 2, domain II;RuvB-like;RuvB-like helicase 2;RuvB-like helicase 2;RuvB-like helicase 2;P-loop containing nucleoside triphosphate hydrolase	PF17856 (PFAM);G3DSA:1.10.8.60 (GENE3D);G3DSA:3.40.50.300 (GENE3D);PF06068 (PFAM);G3DSA:2.40.50.360 (GENE3D);PTHR11093 (PANTHER);PTHR11093:SF2 (PANTHER);cd00009 (CDD);cd00009 (CDD);SSF52540 (SUPERFAMILY)	;ATP binding/DNA helicase activity;5'-3' DNA helicase activity;Ino80 complex/NuA4 histone acetyltransferase complex/5'-3' DNA helicase activity/R2TP complex;
transcript_ACOC_0000015201-mRNA-1	TIP49 protein	MALVGGVELRNVIRVERVGAHSHIHGLGVASNFDPEDVADGMVGQIRARKAAAIVVKMVQTGNIAGRGVLIYGQPGTGKTAIAMGIAKALGQDTPFVSVSASEIFSVEISKSEALTQAFRKAIGVRIKEETEVLEGEVVSIEMDRPATGVGPKVGKLSLKTTDMETIYDLGSKMVDQCIKLRVCAGDVIQIDKGSGRLTRVGRSATRSHDYDAMGPQTKFVPCPRGEIQTTREVVHTVCLHEIDVINSRSQGFLALFTGDTGEIKSEVREQINKKVAEWREEGKAMIQPGVLFIDEAHLLDLECFSFLNRAMESELSPLLIMATNRDRGVVRGTDVTANYCLPPDLVDRLIGIATKPYTSDEIGRILSLRADEEGVR	377	20	0	0.9356	WBA_LOCUS10589;ACOC_LOCUS153;Acey_s0460.g1862;ANCCAN_19150;Acey_s0460.g1862;HPBE_LOCUS14042;ANCCAN_19150;HPBE_LOCUS14042;HPBE_LOCUS14042;DICVIV_12289;NECAME_02959;ANCCAN_19150;Bma-ruvb-2;NBR_LOCUS8969;ANCDUO_15074;ANCCAN_19150;Bm1_34895;HPLM_LOCUS6782;HPBE_LOCUS14042;HPBE_LOCUS14042;ANCCAN_19150;Bm1_34895;Bma-ruvb-2;ANCCAN_19150;Acey_s0460.g1862;HPLM_LOCUS6782;WR25_08469;Bm1_34895;ACOC_LOCUS153;A…	GO:0097255-IEA;GO:0000166-IEA;GO:0032508-IEA;GO:0003678-IEA;GO:0005737-IEA;GO:0003723-IEA;GO:0016491-IEA;GO:0055114-IEA;GO:0016787-IEA;GO:0035267-IEA;GO:0031011-IEA;GO:0004386-IEA;GO:0043139-IEA;GO:0005524-IEA;GO:0005634-IEA;GO:0003676-IEA	R2TP complex-IEA;nucleotide binding-IEA;DNA duplex unwinding-IEA;DNA helicase activity-IEA;cytoplasm-IEA;RNA binding-IEA;oxidoreductase activity-IEA;oxidation-reduction process-IEA;hydrolase activity-IEA;NuA4 histone acetyltransferase complex-IEA;Ino80 complex-IEA;helicase activity-IEA;5'-3' DNA helicase activity-IEA;ATP binding-IEA;nucleus-IEA;nucleic acid binding-IEA	10	GO:0003723;GO:0005524;GO:0005737;GO:0016491;GO:0031011;GO:0032508;GO:0035267;GO:0043139;GO:0055114;GO:0097255	RNA binding;ATP binding;cytoplasm;oxidoreductase activity;Ino80 complex;DNA duplex unwinding;NuA4 histone acetyltransferase complex;5'-3' DNA helicase activity;oxidation-reduction process;R2TP complex	EC:3.6.1.3;EC:3.6.4.12;EC:3.6.1.15	Adenosinetriphosphatase;DNA helicase;Nucleoside-triphosphate phosphatase	IPR010339;IPR042487;IPR027238;IPR037942;IPR027417	HOMOLOGOUS_SUPERFAMILY;DOMAIN;HOMOLOGOUS_SUPERFAMILY;FAMILY;FAMILY;FAMILY;FAMILY;HOMOLOGOUS_SUPERFAMILY	Armadillo-type fold;TIP49, P-loop domain;RuvB-like helicase 2, domain II;RuvB-like;RuvB-like helicase 2;RuvB-like helicase 2;RuvB-like helicase 2;P-loop containing nucleoside triphosphate hydrolase	G3DSA:3.40.50.300 (GENE3D);PF06068 (PFAM);G3DSA:2.40.50.360 (GENE3D);PTHR11093 (PANTHER);PTHR11093:SF2 (PANTHER);cd00009 (CDD);cd00009 (CDD);SSF52540 (SUPERFAMILY)	;ATP binding/DNA helicase activity;5'-3' DNA helicase activity;Ino80 complex/NuA4 histone acetyltransferase complex/5'-3' DNA helicase activity/R2TP complex;
MSTRG.134.1	GroES-like protein	MLSSRAGVLSIRWLSARQLVYSEYGNPSKVVKLETVSLPDTPPAGYVHVKWLGAPINPADLNMIQGVYAVKPSIPAVGGNEGYGRVEKVGSGVTSLRVGDHVISVKAGYGTWRSDGHHKEVDLFQIDNTLSHEHSCSIQVNPPTAYRMLKDFVVLKPGDTVIQNGANSAVGRAAIQICRLRGFRSVNVVRQRDDMATLVDELKGLGANEVITEDQLVREYRGKIKDVKLALNCVGGKSTLLLASTLGFRGCMVTYGGMSKMPLQVSTGPFIFNDIRLTGFWMSRWYEDPGNLEERKRMYTELCAWMKAGELRPPQFQKRRFEDHTEALEAAAVDFTKKQLFVP	343	20	0	0.8118	Cbn-mecr-1;Cni-mecr-1;W09H1.5;W09H1.5;TELCIR_03647;ANCCAN_19150;HPLM_LOCUS6782;GCK72_005275;ANCCAN_19150;HPLM_LOCUS6782;NBR_LOCUS8970;ANCCAN_19150;ANCCEY_08648;W09H1.5;ANCCAN_19150;HPLM_LOCUS6782;ANCCAN_19150;W09H1.5;DICVIV_12290;Cre-mecr-1;HPLM_LOCUS6782;ANCCAN_19150;W09H1.5;HPLM_LOCUS6782;HPLM_LOCUS6782;ANCCAN_19150;Cni-mecr-1;ACOC_LOCUS154;W09H1.5;W09H1.5;ANCCAN_19150;NBR_LOCUS8970;HPLM_LOCUS6…	GO:0097255-IEA;GO:0003678-IEA;GO:0000166-IEA;GO:0032508-IEA;GO:0003723-IEA;GO:0016491-IEA;GO:0005739-IBA;GO:0005739-IEA;GO:0006629-IEA;GO:0019166-IBA;GO:0055114-IEA;GO:0016787-IEA;GO:0035267-IEA;GO:0031011-IEA;GO:0006631-IBA;GO:0006631-IEA;GO:0004386-IEA;GO:0043139-IEA;GO:0005634-IEA;GO:0005524-IEA;GO:0003676-IEA;GO:0006633-IEA	R2TP complex-IEA;DNA helicase activity-IEA;nucleotide binding-IEA;DNA duplex unwinding-IEA;RNA binding-IEA;oxidoreductase activity-IEA;mitochondrion-IBA;mitochondrion-IEA;lipid metabolic process-IEA;trans-2-enoyl-CoA reductase (NADPH) activity-IBA;oxidation-reduction process-IEA;hydrolase activity-IEA;NuA4 histone acetyltransferase complex-IEA;Ino80 complex-IEA;fatty acid metabolic process-IBA;fa…	11	GO:0003723;GO:0005524;GO:0005739;GO:0006631;GO:0019166;GO:0031011;GO:0032508;GO:0035267;GO:0043139;GO:0055114;GO:0097255	RNA binding;ATP binding;mitochondrion;fatty acid metabolic process;trans-2-enoyl-CoA reductase (NADPH) activity;Ino80 complex;DNA duplex unwinding;NuA4 histone acetyltransferase complex;5'-3' DNA helicase activity;oxidation-reduction process;R2TP complex	EC:3.6.1.3;EC:3.6.4.12;EC:1.3.1.38;EC:3.6.1.15	Adenosinetriphosphatase;DNA helicase;Trans-2-enoyl-CoA reductase (NADPH);Nucleoside-triphosphate phosphatase	IPR013149;IPR013154;IPR011032;IPR036291	HOMOLOGOUS_SUPERFAMILY;DOMAIN;DOMAIN;DOMAIN;DOMAIN;DOMAIN;DOMAIN;HOMOLOGOUS_SUPERFAMILY;HOMOLOGOUS_SUPERFAMILY	RNA-binding domain superfamily;Alcohol dehydrogenase, C-terminal;Alcohol dehydrogenase, N-terminal;Alcohol dehydrogenase, N-terminal;Alcohol dehydrogenase, N-terminal;Alcohol dehydrogenase, N-terminal;Alcohol dehydrogenase, N-terminal;GroES-like superfamily;NAD(P)-binding domain superfamily	G3DSA:3.90.180.10 (GENE3D);PF00107 (PFAM);PF08240 (PFAM);G3DSA:3.40.50.720 (GENE3D);PTHR43981:SF2 (PANTHER);PTHR43981 (PANTHER);cd08290 (CDD);SSF50129 (SUPERFAMILY);SSF51735 (SUPERFAMILY)	;oxidation-reduction process;oxidation-reduction process;
transcript_ACOC_0000015301-mRNA-1	GroES-like protein	MLSSRAGVLSIRWLSARQLVYSEYGNPSKVILKLETVSLPDTPPAGYVHVKWLGAPINPADLNMIQGVYAVKPSIPAVGGNEGYGRVEKVGSGVTSLRVGDHVISVKAGYGTWRSDGHHKEVDLFQIDNTLSHEHSCSIQVNPPTAYRMLKDFVVLKPGDTVIQNGANSAVGRAAIQICRLRGFRSVNVVRQRDDMATLVDELKGLGANEVITEDQLSCSGKIKDVKLALNCVGGKSTLLLASTLGFRGCMVTYGGMSKMPLQVDEIHCNFFYHLHYSPFIFNDIRLTGFWMSRWYEDPGNLEERKRMYTELCAWMKAGELRPPQFQKRRFEDHTEALEAAAVDFTKKQLFVP	353	20	0	0.7771	Cbn-mecr-1;Cni-mecr-1;W09H1.5;W09H1.5;TELCIR_03647;ANCCAN_19150;HPLM_LOCUS6782;GCK72_005275;ANCCAN_19150;HPLM_LOCUS6782;NBR_LOCUS8970;ANCCAN_19150;ANCCEY_08648;W09H1.5;ANCCAN_19150;HPLM_LOCUS6782;ANCCAN_19150;W09H1.5;DICVIV_12290;Cre-mecr-1;HPLM_LOCUS6782;ANCCAN_19150;W09H1.5;HPLM_LOCUS6782;HPLM_LOCUS6782;ANCCAN_19150;Cni-mecr-1;ACOC_LOCUS154;W09H1.5;W09H1.5;ANCCAN_19150;NBR_LOCUS8970;HPLM_LOCUS6…	GO:0097255-IEA;GO:0003678-IEA;GO:0000166-IEA;GO:0032508-IEA;GO:0003723-IEA;GO:0016491-IEA;GO:0005739-IBA;GO:0005739-IEA;GO:0006629-IEA;GO:0019166-IBA;GO:0055114-IEA;GO:0016787-IEA;GO:0035267-IEA;GO:0031011-IEA;GO:0006631-IBA;GO:0006631-IEA;GO:0004386-IEA;GO:0043139-IEA;GO:0005634-IEA;GO:0005524-IEA;GO:0003676-IEA;GO:0006633-IEA	R2TP complex-IEA;DNA helicase activity-IEA;nucleotide binding-IEA;DNA duplex unwinding-IEA;RNA binding-IEA;oxidoreductase activity-IEA;mitochondrion-IBA;mitochondrion-IEA;lipid metabolic process-IEA;trans-2-enoyl-CoA reductase (NADPH) activity-IBA;oxidation-reduction process-IEA;hydrolase activity-IEA;NuA4 histone acetyltransferase complex-IEA;Ino80 complex-IEA;fatty acid metabolic process-IBA;fa…	11	GO:0003723;GO:0005524;GO:0005739;GO:0006631;GO:0019166;GO:0031011;GO:0032508;GO:0035267;GO:0043139;GO:0055114;GO:0097255	RNA binding;ATP binding;mitochondrion;fatty acid metabolic process;trans-2-enoyl-CoA reductase (NADPH) activity;Ino80 complex;DNA duplex unwinding;NuA4 histone acetyltransferase complex;5'-3' DNA helicase activity;oxidation-reduction process;R2TP complex	EC:3.6.1.3;EC:3.6.4.12;EC:1.3.1.38;EC:3.6.1.15	Adenosinetriphosphatase;DNA helicase;Trans-2-enoyl-CoA reductase (NADPH);Nucleoside-triphosphate phosphatase	IPR013149;IPR013154;IPR011032;IPR036291	DOMAIN;DOMAIN;DOMAIN;DOMAIN;DOMAIN;DOMAIN;DOMAIN;HOMOLOGOUS_SUPERFAMILY;HOMOLOGOUS_SUPERFAMILY	Alcohol dehydrogenase, C-terminal;Alcohol dehydrogenase, C-terminal;Alcohol dehydrogenase, C-terminal;Alcohol dehydrogenase, N-terminal;Alcohol dehydrogenase, N-terminal;Alcohol dehydrogenase, N-terminal;Alcohol dehydrogenase, N-terminal;GroES-like superfamily;NAD(P)-binding domain superfamily	PF00107 (PFAM);G3DSA:3.40.50.720 (GENE3D);G3DSA:3.90.180.10 (GENE3D);PF08240 (PFAM);PTHR43981 (PANTHER);PTHR43981:SF2 (PANTHER);cd08290 (CDD);SSF50129 (SUPERFAMILY);SSF51735 (SUPERFAMILY)	oxidation-reduction process;oxidation-reduction process;
MSTRG.135.1	CRE-RSP-7 protein	MSGKMKEKIKILQVSNISVTATKDQIFTMFQYIGRIEEMKVYPSDMNITSATTSKCAFIKYDDERAVEVGQHLTNTVLIDRAVVCAPYLQSVIPDEATFTSTGGPVTAGQRQLPPHVTNRVQELDDGSSVLLTVDPQMEALGLPTYPPLPGNTDLAKVEEIRRTIYVGNLPKGVDGQAVLDFFNSYVGEVMYLRMAIGPDTLPCAYAYVEFTNQTSVPIALQNNGIDFQGKPLRIQHSRVAIIKPQAKSADQALEEVEEAIRMGKNGRSRSRSPLRRRRTPSPSPRRKSRSPRRRRSRSRSKSRERRRSRTRSKERKRSRSRDKKRSRSREKRRSRSRERRSRRSRSRDKKRDRSRSRDKKKEKEKDKKERKRSKSRERKKEKDAKRDRSSERKKDKEK…	468	20	0	0.879	FL81_18692;NECAME_02956;Acey_s0460.g1866;ANCCAN_19150;ANCCEY_08647;rsp-7;Acey_s0460.g1866;Acey_s0460.g1866;Cre-rsp-7;Cre-rsp-7;ANCCAN_19150;ANCCAN_19150;rsp-7;ANCDUO_25056;ANCDUO_25056;ANCDUO_25056;ANCCAN_19150;WR25_13270;ANCCAN_19150;FL82_05388;ANCCAN_19150;HPBE_LOCUS14044;WR25_14698;TELCIR_03646;NECAME_02956;ANCCAN_19150;NBR_LOCUS8971;DICVIV_12291;ACOC_LOCUS155;ANCCAN_19150;FL82_05388;HPLM_LOCU…	GO:0097255-IEA;GO:0003678-IEA;GO:0032508-IEA;GO:0000166-IEA;GO:0003723-IBA;GO:0003723-IEA;GO:0016491-IEA;GO:0000381-IEA;GO:0055114-IEA;GO:0016787-IEA;GO:0035267-IEA;GO:0031011-IEA;GO:0004386-IEA;GO:0043139-IEA;GO:0005654-IBA;GO:0005634-IEA;GO:0005524-IEA;GO:0003676-IEA	R2TP complex-IEA;DNA helicase activity-IEA;DNA duplex unwinding-IEA;nucleotide binding-IEA;RNA binding-IBA;RNA binding-IEA;oxidoreductase activity-IEA;regulation of alternative mRNA splicing, via spliceosome-IEA;oxidation-reduction process-IEA;hydrolase activity-IEA;NuA4 histone acetyltransferase complex-IEA;Ino80 complex-IEA;helicase activity-IEA;5'-3' DNA helicase activity-IEA;nucleoplasm-IBA;n…	10	GO:0000381;GO:0003723;GO:0005524;GO:0016491;GO:0031011;GO:0032508;GO:0035267;GO:0043139;GO:0055114;GO:0097255	regulation of alternative mRNA splicing, via spliceosome;RNA binding;ATP binding;oxidoreductase activity;Ino80 complex;DNA duplex unwinding;NuA4 histone acetyltransferase complex;5'-3' DNA helicase activity;oxidation-reduction process;R2TP complex	EC:3.6.1.3;EC:3.6.4.12;EC:3.6.1.15	Adenosinetriphosphatase;DNA helicase;Nucleoside-triphosphate phosphatase	IPR012677;IPR000504;IPR012677;IPR033568;IPR000504;IPR035979;IPR035979	HOMOLOGOUS_SUPERFAMILY;DOMAIN;HOMOLOGOUS_SUPERFAMILY;HOMOLOGOUS_SUPERFAMILY;HOMOLOGOUS_SUPERFAMILY;HOMOLOGOUS_SUPERFAMILY;HOMOLOGOUS_SUPERFAMILY;FAMILY;FAMILY;DOMAIN;DOMAIN;HOMOLOGOUS_SUPERFAMILY;HOMOLOGOUS_SUPERFAMILY	Nucleotide-binding alpha-beta plait domain superfamily;RNA recognition motif domain;Nucleotide-binding alpha-beta plait domain superfamily;Nucleotide-binding alpha-beta plait domain superfamily;Nucleotide-binding alpha-beta plait domain superfamily;Nucleotide-binding alpha-beta plait domain superfamily;Nucleotide-binding alpha-beta plait domain superfamily;Splicing regulatory glutamine/lysine-ric…	G3DSA:3.30.70.330 (GENE3D);PF00076 (PFAM);G3DSA:3.30.70.330 (GENE3D);mobidb-lite (MOBIDB_LITE);mobidb-lite (MOBIDB_LITE);mobidb-lite (MOBIDB_LITE);mobidb-lite (MOBIDB_LITE);PTHR32343:SF7 (PANTHER);PTHR32343 (PANTHER);PS50102 (PROSITE_PROFILES);cd12259 (CDD);SSF54928 (SUPERFAMILY);SSF54928 (SUPERFAMILY)	;nucleic acid binding;regulation of alternative mRNA splicing, via spliceosome;nucleic acid binding;nucleic acid binding;nucleic acid binding
transcript_ACOC_0000015401-mRNA-1	Probable splicing factor, arginine/serine-rich 7	MSGKMKEKIKILQVSNISVTATKDQIFTMFQYIGRIEEMKVYPSDMNITSATTSKCAFIKYDDERAVEVGQHLTNTVLIDRAVVCAPYLQSVIPDEATFTSTGGPVTAGQRQLPPHVTNRVQELDDGSSVLLTVDPQMEALGLPTYPPLPGNTDLAKVEEIRRTIYVGNLPKGVDGQAVLDFFNSYVGEVMYLRMAIGPDTLPCAYAYVEFTNQTSVPIALQNNGIDFQGKPLRIQHSRVAIIKPQAKSADQALEEVEEAIRMGKNGRSRSRSPLRRRRTPSPSPRRKSRSPRRRRSRSRSKSRERRRSRTRSKERKRSRSRDKKRSRSREKRRSRSR	338	20	0	0.9131	FL81_18692;NECAME_02956;Acey_s0460.g1866;ANCCAN_19150;ANCCEY_08647;Acey_s0460.g1866;Acey_s0460.g1866;rsp-7;Cre-rsp-7;rsp-7;Cre-rsp-7;ANCCAN_19150;ANCCAN_19150;ANCDUO_25056;ANCDUO_25056;ANCDUO_25056;ANCCAN_19150;ANCCAN_19150;FL82_05388;ANCCAN_19150;rsp-7;HPBE_LOCUS14044;WR25_14698;TELCIR_03646;NECAME_02956;ANCCAN_19150;NBR_LOCUS8971;DICVIV_12291;ACOC_LOCUS155;rsp-7;ANCCAN_19150;FL82_05388;HPLM_LOC…	GO:0097255-IEA;GO:0000398-ISS;GO:0003678-IEA;GO:0032508-IEA;GO:0000166-IEA;GO:0003723-IBA;GO:0003723-IEA;GO:0016491-IEA;GO:0000381-IEA;GO:0055114-IEA;GO:0016787-IEA;GO:0035267-IEA;GO:0008380-IEA;GO:0031011-IEA;GO:0006397-IEA;GO:0004386-IEA;GO:0043139-IEA;GO:0005654-IBA;GO:0005634-IEA;GO:0005524-IEA;GO:0003676-IEA	R2TP complex-IEA;mRNA splicing, via spliceosome-ISS;DNA helicase activity-IEA;DNA duplex unwinding-IEA;nucleotide binding-IEA;RNA binding-IBA;RNA binding-IEA;oxidoreductase activity-IEA;regulation of alternative mRNA splicing, via spliceosome-IEA;oxidation-reduction process-IEA;hydrolase activity-IEA;NuA4 histone acetyltransferase complex-IEA;RNA splicing-IEA;Ino80 complex-IEA;mRNA processing-IEA…	10	GO:0000381;GO:0003723;GO:0005524;GO:0016491;GO:0031011;GO:0032508;GO:0035267;GO:0043139;GO:0055114;GO:0097255	regulation of alternative mRNA splicing, via spliceosome;RNA binding;ATP binding;oxidoreductase activity;Ino80 complex;DNA duplex unwinding;NuA4 histone acetyltransferase complex;5'-3' DNA helicase activity;oxidation-reduction process;R2TP complex	EC:3.6.1.3;EC:3.6.4.12;EC:3.6.1.15	Adenosinetriphosphatase;DNA helicase;Nucleoside-triphosphate phosphatase	IPR012677;IPR012677;IPR000504;IPR033568;IPR000504;IPR035979;IPR035979	HOMOLOGOUS_SUPERFAMILY;HOMOLOGOUS_SUPERFAMILY;DOMAIN;DOMAIN;DOMAIN;DOMAIN;FAMILY;DOMAIN;DOMAIN;HOMOLOGOUS_SUPERFAMILY;HOMOLOGOUS_SUPERFAMILY	Nucleotide-binding alpha-beta plait domain superfamily;Nucleotide-binding alpha-beta plait domain superfamily;RNA recognition motif domain;RNA recognition motif domain;RNA recognition motif domain;RNA recognition motif domain;Splicing regulatory glutamine/lysine-rich protein 1;RNA recognition motif domain;RNA recognition motif domain;RNA-binding domain superfamily;RNA-binding domain superfamily	G3DSA:3.30.70.330 (GENE3D);G3DSA:3.30.70.330 (GENE3D);PF00076 (PFAM);mobidb-lite (MOBIDB_LITE);mobidb-lite (MOBIDB_LITE);PTHR32343 (PANTHER);PTHR32343:SF7 (PANTHER);PS50102 (PROSITE_PROFILES);cd12259 (CDD);SSF54928 (SUPERFAMILY);SSF54928 (SUPERFAMILY)	;nucleic acid binding;regulation of alternative mRNA splicing, via spliceosome;nucleic acid binding;nucleic acid binding;nucleic acid binding
transcript_ACOC_0000015501-mRNA-1	putative 50S ribosomal protein L7Ae	MADDGVNPKAYPLADTQLSQKLLDLVQQALNYKQLKKGANEATKTLNRGISEVIIMAADAEPLEIILHLPLLCEDKNVPYVFVRSKAALGRACGVTRPVIAVSITQNEGSQLKSQIQKLKEDVEKLLI	128	20	1.3e-87	0.9645	Bm14055;ACOC_LOCUS156;M28.5;OESDEN_10853;WR25_13271;M28.5;M28.5;Cni-M28.5;FL83_21940;FL83_21940;TCNE_LOCUS11860;OFLC_LOCUS5285;OESDEN_10853;SRAE_1000318100;ANCCAN_19152;OFLC_LOCUS5285;M28.5;TCLT_LOCUS2163;NBR_LOCUS8972;DICVIV_12292;SRAE_1000318100;ASIM_LOCUS19222;NAV_LOCUS2286;M28.5;NAV_LOCUS2286;ANCCAN_19152;M28.5;HPBE_LOCUS14045;CBG03041;ANCDUO_12641;WR25_13271;TCNE_LOCUS11860;BPAG_LOCUS1079;HP…	GO:0000398-IBA;GO:0071011-IBA;GO:0003723-IBA;GO:0003723-IEA;GO:0031428-IBA;GO:0000470-IBA;GO:0046540-IBA;GO:1990904-IEA;GO:0032040-IBA;GO:0030490-IBA;GO:0008380-IEA;GO:0005681-IEA;GO:0042254-IEA;GO:0006397-IEA;GO:0005730-IEA;GO:0005840-IEA;GO:0005634-IEA	mRNA splicing, via spliceosome-IBA;precatalytic spliceosome-IBA;RNA binding-IBA;RNA binding-IEA;box C/D snoRNP complex-IBA;maturation of LSU-rRNA-IBA;U4/U6 x U5 tri-snRNP complex-IBA;ribonucleoprotein complex-IEA;small-subunit processome-IBA;maturation of SSU-rRNA-IBA;RNA splicing-IEA;spliceosomal complex-IEA;ribosome biogenesis-IEA;mRNA processing-IEA;nucleolus-IEA;ribosome-IEA;nucleus-IEA	9	GO:0000398;GO:0000470;GO:0003723;GO:0005840;GO:0030490;GO:0031428;GO:0032040;GO:0046540;GO:0071011	mRNA splicing, via spliceosome;maturation of LSU-rRNA;RNA binding;ribosome;maturation of SSU-rRNA;box C/D snoRNP complex;small-subunit processome;U4/U6 x U5 tri-snRNP complex;precatalytic spliceosome	-	-	IPR018492;IPR002415;IPR004038;IPR029064;IPR029064	FAMILY;FAMILY;DOMAIN;HOMOLOGOUS_SUPERFAMILY;HOMOLOGOUS_SUPERFAMILY;HOMOLOGOUS_SUPERFAMILY;HOMOLOGOUS_SUPERFAMILY	Ribosomal protein L7Ae/L8/Nhp2 family;H/ACA ribonucleoprotein complex, subunit Nhp2, eukaryote;Ribosomal protein L7Ae/L30e/S12e/Gadd45;50S ribosomal protein L30e-like;50S ribosomal protein L30e-like;50S ribosomal protein L30e-like;50S ribosomal protein L30e-like	PR00881 (PRINTS);PR00883 (PRINTS);PF01248 (PFAM);G3DSA:3.30.1330.30 (GENE3D);PTHR23105 (PANTHER);PTHR23105:SF117 (PANTHER);SSF55315 (SUPERFAMILY)	;nucleolus/RNA binding;
MSTRG.138.1	immunoglobulin domain protein	MIPVIHDGEDFSRKAVKLLCVDLLHSLSHFALKTGQKFSMKRIQLLAILWNTWKTMGRLIAFSVVLLIQEGIVFALLSSLPHKQPSEMLLPIHSTTALMCEVVFSDAENSKAIWYRNGKEVGSVSRDTNAIFENRNYTAEQPMPEVGFLIMSNISRDDEGLYWCRHAETGIAGELFSLTVAYVDEIPTDKHIEIEPPQPQLGDQLMLVCPLPNAVPQPTIDWLLNGEPVAHTSSDAHSYPNGTLFIRHFSTLHNGVYECVVWNFAARTSSRIVLESKQVENRSGLLESSTLGTRCSLLFRSSILWFLFGCLMSSSSVLIYLLCVLVLMRPTPRSTIVPSMWARSNPLLGPGFRKPIVPVPDFITGAPASDHSGLVRNYEDV	381	20	0	0.7649	FL81_10843;DICVIV_07611;NECAME_16460;zig-10;Acey_s0083.g1659;ASIM_LOCUS16977;ANCCEY_05433;zig-10;ASIM_LOCUS16977;DICVIV_07611;ANCCAN_18725;ANCCEY_05433;Acey_s0083.g1659;CAEBREN_04212;Cni-zig-10;zig-10;ASIM_LOCUS16977;Acey_s0083.g1659;HPBE_LOCUS5527;NBR_LOCUS12314;NBR_LOCUS12314;NECAME_16460;NECAME_16460;FL81_10843;CAEBREN_04212;CAEBREN_04212;ASIM_LOCUS16977;FL81_10843;zig-10;NECAME_16460;Acey_s00…	GO:0070593-IBA;GO:0098632-IBA;GO:0050808-IBA;GO:0007155-IEA;GO:0016020-IEA;GO:0016021-IEA;GO:0007411-IBA;GO:0007411-IEA;GO:0007156-IBA;GO:0032589-IBA;GO:0005886-IBA;GO:0005886-IEA;GO:0030424-IBA	dendrite self-avoidance-IBA;cell-cell adhesion mediator activity-IBA;synapse organization-IBA;cell adhesion-IEA;membrane-IEA;integral component of membrane-IEA;axon guidance-IBA;axon guidance-IEA;homophilic cell adhesion via plasma membrane adhesion molecules-IBA;neuron projection membrane-IBA;plasma membrane-IBA;plasma membrane-IEA;axon-IBA	4	GO:0005886;GO:0007155;GO:0007411;GO:0016021	plasma membrane;cell adhesion;axon guidance;integral component of membrane	-	-	IPR013783;IPR013783;IPR043204;IPR007110;IPR007110;IPR036179;IPR036179	HOMOLOGOUS_SUPERFAMILY;HOMOLOGOUS_SUPERFAMILY;HOMOLOGOUS_SUPERFAMILY;HOMOLOGOUS_SUPERFAMILY;FAMILY;DOMAIN;DOMAIN;DOMAIN;HOMOLOGOUS_SUPERFAMILY;HOMOLOGOUS_SUPERFAMILY	Immunoglobulin-like fold;Immunoglobulin-like fold;Immunoglobulin-like fold;Immunoglobulin-like fold;Basigin-like;Immunoglobulin-like domain;Immunoglobulin-like domain;Immunoglobulin-like domain;Immunoglobulin-like domain superfamily;Immunoglobulin-like domain superfamily	G3DSA:2.60.40.10 (GENE3D);G3DSA:2.60.40.10 (GENE3D);PF13927 (PFAM);PTHR10075:SF46 (PANTHER);PTHR10075 (PANTHER);PS50835 (PROSITE_PROFILES);PS50835 (PROSITE_PROFILES);cd00096 (CDD);SSF48726 (SUPERFAMILY);SSF48726 (SUPERFAMILY)	;protein binding/axon guidance/cell adhesion/plasma membrane;
transcript_ACOC_0000015701-mRNA-1	immunoglobulin domain protein	MDFLYSQNGEPVAHTSSDAHSYPNGTLFIRHFSTLHNGVYECVVWNFAARTSSRIVLESKQVENRSGLLESSTLGTRCSLLFRSSILWFLFGCLMSSSSVLIYLLCVLVLMRPTPRSTIVPSMWARSNPLLGPGFRKPIVPVPDFITGAPASDHSGLVRNYEDV	164	20	3e-117	0.7696	FL82_12151;DICVIV_07611;NECAME_16460;zig-10;Acey_s0083.g1659;ANCCEY_05433;zig-10;DICVIV_07611;ANCCAN_18725;FL82_12151;ANCCEY_05433;Acey_s0083.g1659;CAEBREN_04212;Cni-zig-10;zig-10;Acey_s0083.g1659;HPBE_LOCUS5527;NBR_LOCUS12314;NBR_LOCUS12314;NECAME_16460;NECAME_16460;FL82_12151;CAEBREN_04212;CAEBREN_04212;zig-10;NECAME_16460;Acey_s0083.g1659;NBR_LOCUS12314;Acey_s0083.g1659;zig-10;SVUK_LOCUS17959;…	GO:0070593-IBA;GO:0098632-IBA;GO:0050808-IBA;GO:0007155-IEA;GO:0016020-IEA;GO:0016021-IEA;GO:0007411-IBA;GO:0007411-IEA;GO:0007156-IBA;GO:0032589-IBA;GO:0005886-IBA;GO:0005886-IEA;GO:0030424-IBA	dendrite self-avoidance-IBA;cell-cell adhesion mediator activity-IBA;synapse organization-IBA;cell adhesion-IEA;membrane-IEA;integral component of membrane-IEA;axon guidance-IBA;axon guidance-IEA;homophilic cell adhesion via plasma membrane adhesion molecules-IBA;neuron projection membrane-IBA;plasma membrane-IBA;plasma membrane-IEA;axon-IBA	5	GO:0005886;GO:0007155;GO:0007411;GO:0016021;GO:0043005	plasma membrane;cell adhesion;axon guidance;integral component of membrane;neuron projection	-	-	IPR013783;IPR036179	HOMOLOGOUS_SUPERFAMILY;HOMOLOGOUS_SUPERFAMILY	Immunoglobulin-like fold;Immunoglobulin-like domain superfamily	G3DSA:2.60.40.10 (GENE3D);SSF48726 (SUPERFAMILY)	;
MSTRG.140.1	Bardet-Biedl syndrome 2 protein homolog	MPTSHVEFILKIRNQRILDWVMDTFLIDVDFPINPEEDKMEICFLGLASKRDQPLCIMHLQSDGKTALYHDCMETAGNIIQSLCDYFAIESLEAQAEFPSIFAEVDKICSELDSMYDVRDRLATDLTEKQTQLMEMIIRAEDAIVIGDLDLVRKYYTRIGHLDRTVRQAFHLRSNNHERFVHSLRTLHKIIEQAAKLRCGEPSRKIVSACREAIADDNKAILAKYLRYGA	230	20	1.6e-139	0.8099	CAEBREN_30879;CAEBREN_30879;Acey_s0484.g2315;ANCCEY_13721;NBR_LOCUS17881;NBR_LOCUS17881;Acey_s0484.g2315;NBR_LOCUS17881;SVUK_LOCUS2976;Acey_s0484.g2315;HPBE_LOCUS5582;FL81_05211;ANCDUO_02497;FL81_05211;FL81_05211;Acey_s0484.g2315;OESDEN_09097;CAEBREN_30879;bbs-2;CAEBREN_30879;Acey_s0484.g2315;HPBE_LOCUS5582;CAEBREN_30879;FL81_05211;NBR_LOCUS17881;ANCDUO_02497;CAEBREN_30879;bbs-2;ANCCAN_08795;Acey…	GO:0005856-IEA;GO:0005737-IEA;GO:0016020-IBA;GO:0005929-IEA;GO:0060271-IBA;GO:0031514-IBA;GO:0036064-IDA;GO:0036064-IBA;GO:0036064-IEA;GO:0030030-IEA;GO:0034464-IBA;GO:0034464-IEA;GO:0015031-IEA;GO:1905515-IEP;GO:1905515-IEA;GO:0043005-IDA;GO:0043005-IBA;GO:0043005-IEA;GO:0042995-IEA	cytoskeleton-IEA;cytoplasm-IEA;membrane-IBA;cilium-IEA;cilium assembly-IBA;motile cilium-IBA;ciliary basal body-IDA;ciliary basal body-IBA;ciliary basal body-IEA;cell projection organization-IEA;BBSome-IBA;BBSome-IEA;protein transport-IEA;non-motile cilium assembly-IEP;non-motile cilium assembly-IEA;neuron projection-IDA;neuron projection-IBA;neuron projection-IEA;cell projection-IEA	5	GO:0005737;GO:0034464;GO:0036064;GO:0043005;GO:1905515	cytoplasm;BBSome;ciliary basal body;neuron projection;non-motile cilium assembly	-	-	IPR029333;IPR016616	DOMAIN;FAMILY	Ciliary BBSome complex subunit 2, C-terminal domain;Bardet-Biedl syndrome 2 protein	PF14782 (PFAM);PTHR32465 (PANTHER)	;BBSome/non-motile cilium assembly
transcript_ACOC_0000015801-mRNA-1	FG-GAP repeat protein	MDTFLIDVDFPINPEEDKMEICFLGLASKRDQPLCIMHLQSDGKLDSMYDVRDRLATDLTEKQTQLMEMIIRAEDAIVIGDLCVCSSKSRS	91	20	5.5e-60	0.6609	NBR_LOCUS17881;ANCDUO_02497;HPLM_LOCUS17790;ANCCAN_08795;Acey_s0484.g2315;Acey_s0484.g2315;WR25_04386;OESDEN_09097;ANCCEY_13721;NBR_LOCUS17881;Acey_s0484.g2315;NBR_LOCUS17881;Acey_s0484.g2315;NBR_LOCUS17881;NBR_LOCUS17881;SVUK_LOCUS2976;Acey_s0484.g2315;Acey_s0484.g2315;HPBE_LOCUS5582;TELCIR_13922;WR25_04386;ANCDUO_02497;Acey_s0484.g2315;WR25_04386;TELCIR_13922;WR25_04386;OESDEN_09097;Acey_s0484.…	GO:0005856-IEA;GO:0005737-IEA;GO:0034464-IEA;GO:0005929-IEA;GO:1905515-IEA;GO:0042995-IEA	cytoskeleton-IEA;cytoplasm-IEA;BBSome-IEA;cilium-IEA;non-motile cilium assembly-IEA;cell projection-IEA	2	GO:0034464;GO:1905515	BBSome;non-motile cilium assembly	-	-	-	-	-	-	-
MSTRG.141.1	SWIM zinc finger domain protein	MSGEDDWLVQAAAQEAGMLHLAPDSFEDSDRFEGDSECSWVSSESITLAKNWRGWSHCSPDDNLQSGISTCIYPYQNSYSRSGHYSSSSNIATLRNGSSDKASRSVSSLSDLSARVCARQMSFVELERNYRDICQKKEHISEIPVAHSLPDKLFLSIVYWCFPATADDIRLYSCLANGNADEFNHGGSLYQTGAVRDVVQIGYLLSAVVFASHQECVQAQRHSRVVHNVSLNVDRCRIVSCDCSCASKSAWCQHVVAVCLYRIHQPNEVQFRVTIWDSVNELSMAKLKKFAQYLVNELPKEYLPVAQRLLDQLKCSESEINRSPGAPDPTDGGHEKNAIWTLDVEGLHTSIRRLLIKYCVPAPTVHCDVQYLGTAQHPIAAEWLTIMKSLRAREPEGIW…	1648	20	0	0.7295	ebax-1;ebax-1;ebax-1;WR25_10066;ebax-1;NBR_LOCUS18966;NBR_LOCUS20742;Cni-ebax-1;ebax-1;ebax-1;ebax-1;DICVIV_02038;ebax-1;ebax-1;ebax-1;GCK72_014920;ANCCEY_13720;Acey_s0484.g2320;Bma-ebax-1;ebax-1;ebax-1;ebax-1;Bma-ebax-1;ebax-1;FL83_14049;Bma-pqn-55	GO:0040017-IEA;GO:0051787-IEA;GO:0008270-IEA;GO:0031462-IBA;GO:0031462-IEA;GO:0005829-IEA;GO:1901046-IEA;GO:1902667-IBA;GO:1902667-IEA;GO:0043025-IEA;GO:0005102-IEA;GO:1902435-IEA;GO:0051879-IEA;GO:0030424-IEA	positive regulation of locomotion-IEA;misfolded protein binding-IEA;zinc ion binding-IEA;Cul2-RING ubiquitin ligase complex-IBA;Cul2-RING ubiquitin ligase complex-IEA;cytosol-IEA;positive regulation of oviposition-IEA;regulation of axon guidance-IBA;regulation of axon guidance-IEA;neuronal cell body-IEA;signaling receptor binding-IEA;regulation of male mating behavior-IEA;Hsp90 protein binding-IE…	2	GO:0008270;GO:0050789	zinc ion binding;regulation of biological process	-	-	IPR007527	HOMOLOGOUS_SUPERFAMILY;HOMOLOGOUS_SUPERFAMILY;HOMOLOGOUS_SUPERFAMILY;HOMOLOGOUS_SUPERFAMILY;HOMOLOGOUS_SUPERFAMILY;HOMOLOGOUS_SUPERFAMILY;HOMOLOGOUS_SUPERFAMILY;DOMAIN	RNA-binding domain superfamily;RNA-binding domain superfamily;RNA-binding domain superfamily;RNA-binding domain superfamily;RNA-binding domain superfamily;RNA-binding domain superfamily;RNA-binding domain superfamily;Zinc finger, SWIM-type	mobidb-lite (MOBIDB_LITE);mobidb-lite (MOBIDB_LITE);mobidb-lite (MOBIDB_LITE);mobidb-lite (MOBIDB_LITE);mobidb-lite (MOBIDB_LITE);PTHR22619 (PANTHER);PTHR22619:SF1 (PANTHER);PS50966 (PROSITE_PROFILES)	;zinc ion binding
[truncated: 21,377 more rows]
