# Supplementary material for: Identification of Novel Genes and Proteoforms in Angiostrongylus costaricensis through a Proteogenomic Approach
Source: Pathogens. 2022 Oct 31;11(11):1273. doi: 10.3390/pathogens11111273 (PMC9694666; doi:10.3390/pathogens11111273)
Supplement: Supplementary file 1 [file pathogens-11-01273-s001.zip › Supplemental_Data_S9.xlsx]

## Sheet: SNVs
Supplemental Data S9. Nucleotide and hypothetical amino acid substitutions per transcript
Transcript ID	SNV	Alelle	Nucleotide substitution	Hypotheical Amino acid substitution	Hypothetical conservation of amino acid substitution
MSTRG.100.1	nonsynonymous	homozygous	c.A1189G	p.S397G	nonconservative
MSTRG.100.1	nonsynonymous	homozygous	c.A1234G	p.S412G	nonconservative
MSTRG.100.1	nonsynonymous	homozygous	c.A2756G	p.D919G	nonconservative
MSTRG.100.1	nonsynonymous	homozygous	c.C2020T	p.P674S	nonconservative
MSTRG.100.1	nonsynonymous	homozygous	c.C2215T	p.P739S	nonconservative
MSTRG.100.1	nonsynonymous	homozygous	c.C2657G	p.A886G	conservative
MSTRG.100.1	nonsynonymous	homozygous	c.C2825T	p.A942V	conservative
MSTRG.100.1	nonsynonymous	homozygous	c.G1774A	p.A592T	nonconservative
MSTRG.100.1	nonsynonymous	homozygous	c.G1816A	p.V606I	conservative
MSTRG.100.1	nonsynonymous	homozygous	c.G2383A	p.A795T	nonconservative
MSTRG.100.1	nonsynonymous	homozygous	c.G2573A	p.R858Q	nonconservative
MSTRG.100.1	nonsynonymous	homozygous	c.G2703A	p.M901I	conservative
MSTRG.100.1	nonsynonymous	homozygous	c.G3643T	p.A1215S	nonconservative
MSTRG.100.1	nonsynonymous	homozygous	c.T1621C	p.S541P	nonconservative
MSTRG.100.1	nonsynonymous	homozygous	c.T1732A	p.L578I	conservative
MSTRG.100.1	nonsynonymous	homozygous	c.T1849C	p.S617P	nonconservative
MSTRG.100.1	nonsynonymous	homozygous	c.T2666C	p.V889A	conservative
MSTRG.100.1	nonsynonymous	homozygous	c.T2757A	p.D919E	conservative
MSTRG.100.1	nonsynonymous	homozygous	c.T98C	p.L33P	conservative
MSTRG.100.1	synonymous	homozygous	c.A1002T	p.L334L	NA
MSTRG.100.1	synonymous	homozygous	c.A1281G	p.Q427Q	NA
MSTRG.100.1	synonymous	homozygous	c.A1290T	p.L430L	NA
MSTRG.100.1	synonymous	homozygous	c.A1368T	p.T456T	NA
MSTRG.100.1	synonymous	homozygous	c.A1422G	p.A474A	NA
MSTRG.100.1	synonymous	homozygous	c.A1467T	p.S489S	NA
MSTRG.100.1	synonymous	homozygous	c.A1884C	p.G628G	NA
MSTRG.100.1	synonymous	homozygous	c.A411G	p.K137K	NA
MSTRG.100.1	synonymous	homozygous	c.A798G	p.E266E	NA
MSTRG.100.1	synonymous	homozygous	c.C1110T	p.S370S	NA
MSTRG.100.1	synonymous	homozygous	c.C114T	p.A38A	NA
MSTRG.100.1	synonymous	homozygous	c.C1374T	p.F458F	NA
MSTRG.100.1	synonymous	homozygous	c.C1392T	p.P464P	NA
MSTRG.100.1	synonymous	homozygous	c.C1500T	p.D500D	NA
MSTRG.100.1	synonymous	homozygous	c.C1791T	p.A597A	NA
MSTRG.100.1	synonymous	homozygous	c.C1971T	p.Y657Y	NA
MSTRG.100.1	synonymous	homozygous	c.C2133T	p.H711H	NA
MSTRG.100.1	synonymous	homozygous	c.C2649T	p.G883G	NA
MSTRG.100.1	synonymous	homozygous	c.C2841T	p.D947D	NA
MSTRG.100.1	synonymous	homozygous	c.C2850T	p.A950A	NA
MSTRG.100.1	synonymous	homozygous	c.C3525A	p.S1175S	NA
MSTRG.100.1	synonymous	homozygous	c.C513A	p.V171V	NA
MSTRG.100.1	synonymous	homozygous	c.C858T	p.R286R	NA
MSTRG.100.1	synonymous	homozygous	c.G117A	p.Q39Q	NA
MSTRG.100.1	synonymous	homozygous	c.G1509A	p.K503K	NA
MSTRG.100.1	synonymous	homozygous	c.G2370C	p.L790L	NA
MSTRG.100.1	synonymous	homozygous	c.G267C	p.V89V	NA
MSTRG.100.1	synonymous	homozygous	c.G2940A	p.E980E	NA
MSTRG.100.1	synonymous	homozygous	c.G2982A	p.R994R	NA
MSTRG.100.1	synonymous	homozygous	c.G3030A	p.K1010K	NA
MSTRG.100.1	synonymous	homozygous	c.G3120A	p.G1040G	NA
MSTRG.100.1	synonymous	homozygous	c.G3156A	p.Q1052Q	NA
MSTRG.100.1	synonymous	homozygous	c.T1095G	p.P365P	NA
MSTRG.100.1	synonymous	homozygous	c.T1395C	p.N465N	NA
MSTRG.100.1	synonymous	homozygous	c.T3105A	p.G1035G	NA
MSTRG.100.1	synonymous	homozygous	c.T384C	p.Y128Y	NA
MSTRG.100.1	synonymous	homozygous	c.T897C	p.D299D	NA
MSTRG.100.1	synonymous	homozygous	c.T990C	p.I330I	NA
MSTRG.10002.1	nonsynonymous	homozygous	c.A1193G	p.Q398R	nonconservative
MSTRG.10002.1	nonsynonymous	homozygous	c.A277C	p.T93P	nonconservative
MSTRG.10002.1	nonsynonymous	homozygous	c.A915G	p.I305M	conservative
MSTRG.10002.1	nonsynonymous	homozygous	c.C886A	p.P296T	nonconservative
MSTRG.10002.1	nonsynonymous	homozygous	c.G1685A	p.R562K	conservative
MSTRG.10002.1	nonsynonymous	homozygous	c.T883A	p.S295T	conservative
MSTRG.10002.1	synonymous	homozygous	c.A105G	p.L35L	NA
MSTRG.10002.1	synonymous	homozygous	c.A279G	p.T93T	NA
MSTRG.10002.1	synonymous	homozygous	c.A585G	p.L195L	NA
MSTRG.10002.1	synonymous	homozygous	c.A612C	p.G204G	NA
MSTRG.10002.1	synonymous	homozygous	c.C1362G	p.L454L	NA
MSTRG.10002.1	synonymous	homozygous	c.C1650T	p.L550L	NA
MSTRG.10002.1	synonymous	homozygous	c.C546T	p.G182G	NA
MSTRG.10002.1	synonymous	homozygous	c.G1668A	p.S556S	NA
MSTRG.10002.1	synonymous	homozygous	c.G1710A	p.L570L	NA
MSTRG.10002.1	synonymous	heterozygous	c.G669A	p.R223R	NA
MSTRG.10002.1	synonymous	homozygous	c.T1329C	p.Y443Y	NA
MSTRG.10002.1	synonymous	homozygous	c.T348C	p.I116I	NA
MSTRG.10002.1	synonymous	homozygous	c.T540C	p.T180T	NA
MSTRG.10002.1	synonymous	heterozygous	c.T684C	p.N228N	NA
MSTRG.10002.1	synonymous	homozygous	c.T843G	p.L281L	NA
MSTRG.10004.1	nonsynonymous	homozygous	c.G217C	p.V73L	conservative
MSTRG.10004.1	synonymous	homozygous	c.A327G	p.V109V	NA
MSTRG.10004.1	synonymous	homozygous	c.C549T	p.C183C	NA
MSTRG.10004.1	synonymous	homozygous	c.T1074G	p.T358T	NA
MSTRG.10004.1	synonymous	homozygous	c.T28C	p.L10L	NA
MSTRG.10004.1	synonymous	homozygous	c.T714C	p.F238F	NA
MSTRG.10009.1	nonsynonymous	homozygous	c.A1089T	p.E363D	conservative
MSTRG.10009.1	nonsynonymous	homozygous	c.A1238G	p.N413S	conservative
MSTRG.10009.1	nonsynonymous	homozygous	c.A184G	p.K62E	nonconservative
MSTRG.10009.1	nonsynonymous	homozygous	c.A1960G	p.R654G	nonconservative
MSTRG.10009.1	nonsynonymous	homozygous	c.A2057G	p.D686G	nonconservative
MSTRG.10009.1	nonsynonymous	homozygous	c.A2090T	p.E697V	nonconservative
MSTRG.10009.1	nonsynonymous	homozygous	c.A2208T	p.Q736H	nonconservative
MSTRG.10009.1	nonsynonymous	homozygous	c.A2391C	p.E797D	conservative
MSTRG.10009.1	nonsynonymous	homozygous	c.A2554C	p.I852L	conservative
MSTRG.10009.1	nonsynonymous	homozygous	c.A59G	p.Y20C	conservative
MSTRG.10009.1	nonsynonymous	homozygous	c.A791T	p.K264M	nonconservative
MSTRG.10009.1	nonsynonymous	homozygous	c.C1747T	p.P583S	nonconservative
MSTRG.10009.1	nonsynonymous	homozygous	c.C1811T	p.A604V	conservative
MSTRG.10009.1	nonsynonymous	homozygous	c.C1885T	p.H629Y	nonconservative
MSTRG.10009.1	nonsynonymous	homozygous	c.C2087A	p.A696E	nonconservative
MSTRG.10009.1	nonsynonymous	homozygous	c.C2346G	p.F782L	conservative
MSTRG.10009.1	nonsynonymous	homozygous	c.C2431G	p.L811V	conservative
MSTRG.10009.1	nonsynonymous	homozygous	c.C2572G	p.R858G	nonconservative
MSTRG.10009.1	nonsynonymous	homozygous	c.C442G	p.L148V	conservative
MSTRG.10009.1	nonsynonymous	homozygous	c.C489A	p.D163E	conservative
MSTRG.10009.1	nonsynonymous	homozygous	c.C652T	p.L218F	conservative
MSTRG.10009.1	nonsynonymous	homozygous	c.G1130C	p.R377P	nonconservative
MSTRG.10009.1	nonsynonymous	homozygous	c.G1418A	p.G473E	nonconservative
MSTRG.10009.1	nonsynonymous	homozygous	c.G1673T	p.R558L	nonconservative
MSTRG.10009.1	nonsynonymous	homozygous	c.G1871A	p.R624Q	nonconservative
MSTRG.10009.1	nonsynonymous	homozygous	c.G556A	p.D186N	nonconservative
MSTRG.10009.1	nonsynonymous	homozygous	c.G640C	p.V214L	conservative
MSTRG.10009.1	nonsynonymous	homozygous	c.G794A	p.R265K	conservative
MSTRG.10009.1	nonsynonymous	homozygous	c.G946A	p.G316R	nonconservative
MSTRG.10009.1	nonsynonymous	homozygous	c.T118A	p.F40I	conservative
MSTRG.10009.1	nonsynonymous	homozygous	c.T1576A	p.S526T	conservative
MSTRG.10009.1	nonsynonymous	homozygous	c.T1655C	p.L552S	nonconservative
MSTRG.10009.1	nonsynonymous	homozygous	c.T2345G	p.F782C	nonconservative
MSTRG.10009.1	nonsynonymous	homozygous	c.T2507G	p.M836R	nonconservative
MSTRG.10009.1	nonsynonymous	homozygous	c.T251C	p.I84T	nonconservative
MSTRG.10009.1	nonsynonymous	homozygous	c.T2729G	p.I910R	nonconservative
MSTRG.10009.1	nonsynonymous	homozygous	c.T580C	p.F194L	conservative
MSTRG.10009.1	nonsynonymous	homozygous	c.T749C	p.L250S	nonconservative
MSTRG.10009.1	synonymous	homozygous	c.A144G	p.V48V	NA
MSTRG.10009.1	synonymous	homozygous	c.A1533G	p.K511K	NA
MSTRG.10009.1	synonymous	homozygous	c.A1803G	p.K601K	NA
MSTRG.10009.1	synonymous	homozygous	c.A1815G	p.G605G	NA
MSTRG.10009.1	synonymous	homozygous	c.A255G	p.T85T	NA
MSTRG.10009.1	synonymous	homozygous	c.A2622G	p.Q874Q	NA
MSTRG.10009.1	synonymous	homozygous	c.A573G	p.R191R	NA
MSTRG.10009.1	synonymous	homozygous	c.A867C	p.R289R	NA
MSTRG.10009.1	synonymous	homozygous	c.A984G	p.L328L	NA
MSTRG.10009.1	synonymous	homozygous	c.C1260T	p.T420T	NA
MSTRG.10009.1	synonymous	homozygous	c.C1650T	p.D550D	NA
MSTRG.10009.1	synonymous	homozygous	c.C1905T	p.C635C	NA
MSTRG.10009.1	synonymous	homozygous	c.C1920T	p.S640S	NA
MSTRG.10009.1	synonymous	homozygous	c.C2658T	p.A886A	NA
MSTRG.10009.1	synonymous	homozygous	c.G1335C	p.G445G	NA
MSTRG.10009.1	synonymous	homozygous	c.G1605A	p.R535R	NA
MSTRG.10009.1	synonymous	homozygous	c.G2634A	p.G878G	NA
MSTRG.10009.1	synonymous	homozygous	c.G288A	p.L96L	NA
MSTRG.10009.1	synonymous	homozygous	c.G693A	p.L231L	NA
MSTRG.10009.1	synonymous	homozygous	c.T129C	p.G43G	NA
MSTRG.10009.1	synonymous	homozygous	c.T1398C	p.C466C	NA
MSTRG.10009.1	synonymous	homozygous	c.T1881A	p.T627T	NA
MSTRG.10009.1	synonymous	homozygous	c.T1950C	p.Y650Y	NA
MSTRG.10009.1	synonymous	heterozygous	c.T2583C	p.G861G	NA
MSTRG.10009.1	synonymous	homozygous	c.T2586C	p.Y862Y	NA
MSTRG.10009.1	synonymous	homozygous	c.T519C	p.N173N	NA
MSTRG.10009.1	synonymous	homozygous	c.T762C	p.F254F	NA
MSTRG.1001.2	nonsynonymous	homozygous	c.A1087G	p.I363V	conservative
MSTRG.1001.2	nonsynonymous	homozygous	c.A11G	p.Q4R	nonconservative
MSTRG.1001.2	nonsynonymous	homozygous	c.A1475G	p.D492G	nonconservative
MSTRG.1001.2	nonsynonymous	homozygous	c.A1619G	p.D540G	nonconservative
MSTRG.1001.2	nonsynonymous	homozygous	c.C1390G	p.P464A	conservative
MSTRG.1001.2	nonsynonymous	homozygous	c.C1585T	p.P529S	nonconservative
MSTRG.1001.2	nonsynonymous	homozygous	c.C1771A	p.P591T	nonconservative
MSTRG.1001.2	nonsynonymous	homozygous	c.C29G	p.P10R	nonconservative
MSTRG.1001.2	nonsynonymous	homozygous	c.G1345C	p.D449H	nonconservative
MSTRG.1001.2	nonsynonymous	homozygous	c.G1582A	p.V528I	conservative
MSTRG.1001.2	nonsynonymous	homozygous	c.G1805A	p.G602D	nonconservative
MSTRG.1001.2	nonsynonymous	homozygous	c.G70C	p.A24P	conservative
MSTRG.1001.2	nonsynonymous	homozygous	c.T131C	p.V44A	conservative
MSTRG.1001.2	synonymous	homozygous	c.A1569G	p.A523A	NA
MSTRG.1001.2	synonymous	homozygous	c.A1584G	p.V528V	NA
MSTRG.1001.2	synonymous	homozygous	c.A1878T	p.T626T	NA
MSTRG.1001.2	synonymous	homozygous	c.A234G	p.Q78Q	NA
MSTRG.1001.2	synonymous	homozygous	c.A297G	p.Q99Q	NA
MSTRG.1001.2	synonymous	homozygous	c.A399G	p.T133T	NA
MSTRG.1001.2	synonymous	homozygous	c.A549G	p.V183V	NA
MSTRG.1001.2	synonymous	homozygous	c.A618C	p.A206A	NA
MSTRG.1001.2	synonymous	homozygous	c.C1035A	p.P345P	NA
MSTRG.1001.2	synonymous	homozygous	c.C1173T	p.I391I	NA
MSTRG.1001.2	synonymous	homozygous	c.C1605T	p.R535R	NA
MSTRG.1001.2	synonymous	homozygous	c.C363T	p.G121G	NA
MSTRG.1001.2	synonymous	homozygous	c.C504T	p.G168G	NA
MSTRG.1001.2	synonymous	homozygous	c.C681T	p.S227S	NA
MSTRG.1001.2	synonymous	homozygous	c.C90G	p.G30G	NA
MSTRG.1001.2	synonymous	homozygous	c.C957T	p.L319L	NA
MSTRG.1001.2	synonymous	homozygous	c.G1167A	p.K389K	NA
MSTRG.1001.2	synonymous	homozygous	c.G1368A	p.E456E	NA
MSTRG.1001.2	synonymous	homozygous	c.G1458A	p.K486K	NA
MSTRG.1001.2	synonymous	homozygous	c.G963A	p.Q321Q	NA
MSTRG.1001.2	synonymous	homozygous	c.T1125C	p.T375T	NA
MSTRG.1001.2	synonymous	homozygous	c.T1731G	p.P577P	NA
MSTRG.1001.2	synonymous	homozygous	c.T249C	p.T83T	NA
MSTRG.1001.2	synonymous	homozygous	c.T351C	p.V117V	NA
MSTRG.1001.2	synonymous	homozygous	c.T576C	p.A192A	NA
MSTRG.10010.1	nonsynonymous	homozygous	c.A448G	p.T150A	nonconservative
MSTRG.10010.1	nonsynonymous	homozygous	c.G145T	p.A49S	nonconservative
MSTRG.10010.1	nonsynonymous	homozygous	c.G267A	p.M89I	conservative
MSTRG.10010.1	nonsynonymous	homozygous	c.G286A	p.G96R	nonconservative
MSTRG.10010.1	nonsynonymous	homozygous	c.G389C	p.R130P	nonconservative
MSTRG.10010.1	nonsynonymous	heterozygous	c.G443A	p.R148K	conservative
MSTRG.10010.1	nonsynonymous	homozygous	c.G593A	p.G198D	nonconservative
MSTRG.10010.1	nonsynonymous	homozygous	c.G667C	p.E223Q	nonconservative
MSTRG.10010.1	nonsynonymous	homozygous	c.G802A	p.V268I	conservative
MSTRG.10010.1	nonsynonymous	homozygous	c.T590C	p.L197P	conservative
MSTRG.10010.1	synonymous	homozygous	c.A210G	p.G70G	NA
MSTRG.10010.1	synonymous	homozygous	c.A450T	p.T150T	NA
MSTRG.10010.1	synonymous	homozygous	c.C124A	p.R42R	NA
MSTRG.10010.1	synonymous	homozygous	c.C309T	p.S103S	NA
MSTRG.10010.1	synonymous	homozygous	c.C399T	p.I133I	NA
MSTRG.10010.1	synonymous	homozygous	c.C432T	p.D144D	NA
MSTRG.10010.1	synonymous	homozygous	c.C666T	p.Y222Y	NA
MSTRG.10010.1	synonymous	homozygous	c.C69T	p.D23D	NA
MSTRG.10010.1	synonymous	homozygous	c.C795T	p.T265T	NA
MSTRG.10010.1	synonymous	homozygous	c.C834T	p.V278V	NA
MSTRG.10010.1	synonymous	homozygous	c.G117A	p.L39L	NA
MSTRG.10010.1	synonymous	homozygous	c.G213A	p.L71L	NA
MSTRG.10010.1	synonymous	homozygous	c.T273C	p.I91I	NA
MSTRG.10010.1	synonymous	homozygous	c.T27C	p.C9C	NA
MSTRG.10010.1	synonymous	homozygous	c.T426C	p.Y142Y	NA
MSTRG.10010.1	synonymous	homozygous	c.T613C	p.L205L	NA
MSTRG.10010.1	synonymous	homozygous	c.T849C	p.F283F	NA
MSTRG.10011.1	nonsynonymous	homozygous	c.A34G	p.S12G	nonconservative
MSTRG.10011.1	nonsynonymous	homozygous	c.A488T	p.Y163F	nonconservative
MSTRG.10011.1	nonsynonymous	homozygous	c.A862T	p.T288S	conservative
MSTRG.10011.1	nonsynonymous	homozygous	c.A893T	p.E298V	nonconservative
MSTRG.10011.1	nonsynonymous	homozygous	c.C695T	p.T232I	nonconservative
MSTRG.10011.1	nonsynonymous	homozygous	c.C820A	p.L274I	conservative
MSTRG.10011.1	nonsynonymous	homozygous	c.C833G	p.T278S	conservative
MSTRG.10011.1	nonsynonymous	homozygous	c.G230A	p.S77N	conservative
MSTRG.10011.1	synonymous	homozygous	c.A33C	p.G11G	NA
MSTRG.10011.1	synonymous	homozygous	c.A414G	p.R138R	NA
MSTRG.10011.1	synonymous	homozygous	c.A453C	p.P151P	NA
MSTRG.10011.1	synonymous	homozygous	c.A543G	p.T181T	NA
MSTRG.10011.1	synonymous	homozygous	c.A616C	p.R206R	NA
MSTRG.10011.1	synonymous	homozygous	c.C351T	p.H117H	NA
MSTRG.10011.1	synonymous	homozygous	c.C507T	p.D169D	NA
MSTRG.10011.1	synonymous	homozygous	c.G309A	p.L103L	NA
MSTRG.10011.1	synonymous	homozygous	c.G501T	p.V167V	NA
MSTRG.10011.1	synonymous	heterozygous	c.T162C	p.V54V	NA
MSTRG.10011.1	synonymous	homozygous	c.T367C	p.L123L	NA
MSTRG.10011.1	synonymous	homozygous	c.T684C	p.N228N	NA
MSTRG.10011.1	synonymous	homozygous	c.T720C	p.D240D	NA
MSTRG.10011.1	synonymous	homozygous	c.T72C	p.S24S	NA
MSTRG.10011.1	synonymous	homozygous	c.T843C	p.F281F	NA
MSTRG.10012.1	nonsynonymous	homozygous	c.A228C	p.Q76H	nonconservative
MSTRG.10012.1	nonsynonymous	homozygous	c.A352G	p.K118E	nonconservative
MSTRG.10012.1	nonsynonymous	homozygous	c.C14T	p.P5L	conservative
MSTRG.10012.1	nonsynonymous	homozygous	c.C236T	p.P79L	conservative
MSTRG.10012.1	nonsynonymous	homozygous	c.C718A	p.P240T	nonconservative
MSTRG.10012.1	nonsynonymous	homozygous	c.C946A	p.H316N	nonconservative
MSTRG.10012.1	nonsynonymous	homozygous	c.G313C	p.D105H	nonconservative
MSTRG.10012.1	nonsynonymous	homozygous	c.G911A	p.R304K	conservative
MSTRG.10012.1	nonsynonymous	homozygous	c.T800C	p.V267A	conservative
MSTRG.10012.1	nonsynonymous	homozygous	c.T871G	p.L291V	conservative
MSTRG.10012.1	nonsynonymous	homozygous	c.T983C	p.I328T	nonconservative
MSTRG.10012.1	synonymous	homozygous	c.A399T	p.L133L	NA
MSTRG.10012.1	synonymous	homozygous	c.C453T	p.H151H	NA
MSTRG.10012.1	synonymous	heterozygous	c.C546A	p.G182G	NA
MSTRG.10012.1	synonymous	homozygous	c.C720G	p.P240P	NA
MSTRG.10012.1	synonymous	homozygous	c.C966T	p.N322N	NA
MSTRG.10012.1	synonymous	homozygous	c.C9T	p.P3P	NA
MSTRG.10012.1	synonymous	homozygous	c.G165A	p.R55R	NA
MSTRG.10012.1	synonymous	homozygous	c.G264A	p.A88A	NA
MSTRG.10012.1	synonymous	homozygous	c.G612C	p.S204S	NA
MSTRG.10012.1	synonymous	homozygous	c.G804A	p.K268K	NA
MSTRG.10012.1	synonymous	homozygous	c.T177C	p.T59T	NA
MSTRG.10012.1	synonymous	homozygous	c.T852C	p.P284P	NA
MSTRG.10012.3	nonsynonymous	homozygous	c.A228C	p.Q76H	nonconservative
MSTRG.10012.3	nonsynonymous	homozygous	c.A352G	p.K118E	nonconservative
MSTRG.10012.3	nonsynonymous	homozygous	c.C14T	p.P5L	conservative
MSTRG.10012.3	nonsynonymous	homozygous	c.C236T	p.P79L	conservative
MSTRG.10012.3	nonsynonymous	homozygous	c.G313C	p.D105H	nonconservative
MSTRG.10012.3	synonymous	homozygous	c.C9T	p.P3P	NA
MSTRG.10012.3	synonymous	homozygous	c.G165A	p.R55R	NA
MSTRG.10012.3	synonymous	homozygous	c.G264A	p.A88A	NA
MSTRG.10012.3	synonymous	homozygous	c.T177C	p.T59T	NA
MSTRG.10014.1	nonsynonymous	homozygous	c.G536A	p.R179K	conservative
MSTRG.10014.1	synonymous	homozygous	c.C582T	p.I194I	NA
MSTRG.10015.1	nonsynonymous	homozygous	c.A1C	p.M1L	conservative
MSTRG.10015.1	nonsynonymous	homozygous	c.A9C	p.R3S	nonconservative
MSTRG.10015.1	nonsynonymous	homozygous	c.C716T	p.T239I	nonconservative
MSTRG.10015.1	nonsynonymous	homozygous	c.T623C	p.V208A	conservative
MSTRG.10015.1	synonymous	homozygous	c.C486T	p.T162T	NA
MSTRG.10015.1	synonymous	homozygous	c.C708T	p.I236I	NA
MSTRG.10015.1	synonymous	homozygous	c.T105C	p.N35N	NA
MSTRG.10015.1	synonymous	homozygous	c.T114C	p.C38C	NA
MSTRG.10015.2	nonsynonymous	homozygous	c.A1025C	p.N342T	conservative
MSTRG.10015.2	nonsynonymous	homozygous	c.A1117G	p.T373A	nonconservative
MSTRG.10015.2	nonsynonymous	homozygous	c.A1120C	p.T374P	nonconservative
MSTRG.10015.2	nonsynonymous	homozygous	c.A1198C	p.I400L	conservative
MSTRG.10015.2	nonsynonymous	homozygous	c.A1360G	p.N454D	nonconservative
MSTRG.10015.2	nonsynonymous	homozygous	c.A1366G	p.T456A	nonconservative
MSTRG.10015.2	nonsynonymous	homozygous	c.A1C	p.M1L	conservative
MSTRG.10015.2	nonsynonymous	homozygous	c.A946G	p.T316A	nonconservative
MSTRG.10015.2	nonsynonymous	homozygous	c.A9C	p.R3S	nonconservative
MSTRG.10015.2	nonsynonymous	homozygous	c.C1405G	p.Q469E	nonconservative
MSTRG.10015.2	nonsynonymous	homozygous	c.G1169A	p.G390E	nonconservative
MSTRG.10015.2	nonsynonymous	homozygous	c.G1358A	p.R453Q	nonconservative
MSTRG.10015.2	nonsynonymous	homozygous	c.G886C	p.A296P	conservative
MSTRG.10015.2	nonsynonymous	homozygous	c.T1136C	p.F379S	nonconservative
MSTRG.10015.2	nonsynonymous	homozygous	c.T668A	p.V223E	nonconservative
MSTRG.10015.2	synonymous	homozygous	c.A1221G	p.E407E	NA
MSTRG.10015.2	synonymous	homozygous	c.A1440G	p.E480E	NA
MSTRG.10015.2	synonymous	homozygous	c.A669C	p.V223V	NA
MSTRG.10015.2	synonymous	homozygous	c.C1533T	p.H511H	NA
MSTRG.10015.2	synonymous	homozygous	c.C486T	p.T162T	NA
MSTRG.10015.2	synonymous	homozygous	c.G1395A	p.P465P	NA
MSTRG.10015.2	synonymous	homozygous	c.T105C	p.N35N	NA
MSTRG.10015.2	synonymous	homozygous	c.T114C	p.C38C	NA
MSTRG.10015.2	synonymous	homozygous	c.T1500C	p.N500N	NA
MSTRG.10015.2	synonymous	homozygous	c.T1503C	p.S501S	NA
MSTRG.10015.2	synonymous	homozygous	c.T846C	p.F282F	NA
MSTRG.10015.3	nonsynonymous	homozygous	c.A1034C	p.N345T	conservative
MSTRG.10015.3	nonsynonymous	homozygous	c.A1126G	p.T376A	nonconservative
MSTRG.10015.3	nonsynonymous	homozygous	c.A1129C	p.T377P	nonconservative
MSTRG.10015.3	nonsynonymous	homozygous	c.A1207C	p.I403L	conservative
MSTRG.10015.3	nonsynonymous	homozygous	c.A1369G	p.N457D	nonconservative
MSTRG.10015.3	nonsynonymous	homozygous	c.A1375G	p.T459A	nonconservative
MSTRG.10015.3	nonsynonymous	homozygous	c.A1C	p.M1L	conservative
MSTRG.10015.3	nonsynonymous	homozygous	c.A955G	p.T319A	nonconservative
MSTRG.10015.3	nonsynonymous	homozygous	c.A9C	p.R3S	nonconservative
MSTRG.10015.3	nonsynonymous	homozygous	c.C1414G	p.Q472E	nonconservative
MSTRG.10015.3	nonsynonymous	homozygous	c.G1178A	p.G393E	nonconservative
MSTRG.10015.3	nonsynonymous	homozygous	c.G1367A	p.R456Q	nonconservative
MSTRG.10015.3	nonsynonymous	homozygous	c.G895C	p.A299P	conservative
MSTRG.10015.3	nonsynonymous	homozygous	c.T1145C	p.F382S	nonconservative
MSTRG.10015.3	nonsynonymous	homozygous	c.T677A	p.V226E	nonconservative
MSTRG.10015.3	synonymous	homozygous	c.A1230G	p.E410E	NA
MSTRG.10015.3	synonymous	homozygous	c.A1449G	p.E483E	NA
MSTRG.10015.3	synonymous	homozygous	c.A678C	p.V226V	NA
MSTRG.10015.3	synonymous	homozygous	c.C1542T	p.H514H	NA
MSTRG.10015.3	synonymous	homozygous	c.C486T	p.T162T	NA
MSTRG.10015.3	synonymous	homozygous	c.G1404A	p.P468P	NA
MSTRG.10015.3	synonymous	homozygous	c.T105C	p.N35N	NA
MSTRG.10015.3	synonymous	homozygous	c.T114C	p.C38C	NA
MSTRG.10015.3	synonymous	homozygous	c.T1509C	p.N503N	NA
MSTRG.10015.3	synonymous	homozygous	c.T1512C	p.S504S	NA
MSTRG.10015.3	synonymous	homozygous	c.T855C	p.F285F	NA
MSTRG.10016.1	nonsynonymous	heterozygous	c.C80T	p.A27V	conservative
MSTRG.10016.1	nonsynonymous	homozygous	c.G73T	p.G25C	nonconservative
MSTRG.10016.1	synonymous	homozygous	c.A162G	p.T54T	NA
MSTRG.10016.1	synonymous	homozygous	c.A222G	p.S74S	NA
MSTRG.10016.1	synonymous	heterozygous	c.A441G	p.A147A	NA
MSTRG.10016.1	synonymous	homozygous	c.A879G	p.E293E	NA
MSTRG.10016.1	synonymous	homozygous	c.C1569T	p.L523L	NA
MSTRG.10016.1	synonymous	homozygous	c.C885T	p.S295S	NA
MSTRG.10016.1	synonymous	homozygous	c.G1239A	p.T413T	NA
MSTRG.10016.1	synonymous	homozygous	c.G1443A	p.Q481Q	NA
MSTRG.10016.1	synonymous	homozygous	c.G690A	p.R230R	NA
MSTRG.10016.1	synonymous	homozygous	c.T990C	p.G330G	NA
MSTRG.10017.1	nonsynonymous	homozygous	c.A373G	p.N125D	nonconservative
MSTRG.10017.1	nonsynonymous	homozygous	c.C389T	p.A130V	conservative
MSTRG.10017.1	nonsynonymous	homozygous	c.G370A	p.D124N	nonconservative
MSTRG.10017.1	nonsynonymous	homozygous	c.G388A	p.A130T	nonconservative
MSTRG.10017.1	nonsynonymous	homozygous	c.T320C	p.V107A	conservative
MSTRG.10017.1	nonsynonymous	homozygous	c.T385C	p.F129L	conservative
MSTRG.10017.1	synonymous	homozygous	c.A183T	p.T61T	NA
MSTRG.10017.1	synonymous	homozygous	c.C603G	p.T201T	NA
MSTRG.10017.1	synonymous	homozygous	c.C90T	p.R30R	NA
MSTRG.10017.1	synonymous	homozygous	c.G696A	p.T232T	NA
MSTRG.10017.1	synonymous	homozygous	c.G747A	p.S249S	NA
MSTRG.10017.1	synonymous	homozygous	c.G765A	p.L255L	NA
MSTRG.10017.1	synonymous	homozygous	c.G81A	p.Q27Q	NA
MSTRG.10017.1	synonymous	homozygous	c.G915C	p.A305A	NA
MSTRG.10017.1	synonymous	homozygous	c.T480C	p.I160I	NA
MSTRG.10019.1	nonsynonymous	homozygous	c.A196T	p.M66L	conservative
MSTRG.10019.1	nonsynonymous	homozygous	c.A350G	p.K117R	conservative
MSTRG.10019.1	nonsynonymous	homozygous	c.G76C	p.V26L	conservative
MSTRG.10019.1	nonsynonymous	homozygous	c.T677C	p.V226A	conservative
MSTRG.10019.1	synonymous	homozygous	c.C204T	p.S68S	NA
MSTRG.10019.1	synonymous	homozygous	c.C279T	p.C93C	NA
MSTRG.10019.1	synonymous	homozygous	c.C801T	p.N267N	NA
MSTRG.10019.1	synonymous	homozygous	c.G651A	p.Q217Q	NA
MSTRG.10019.1	synonymous	homozygous	c.T471C	p.G157G	NA
MSTRG.10019.1	synonymous	homozygous	c.T525C	p.Y175Y	NA
MSTRG.10019.1	synonymous	homozygous	c.T640C	p.L214L	NA
MSTRG.10019.1	synonymous	homozygous	c.T654C	p.Y218Y	NA
MSTRG.1002.1	nonsynonymous	homozygous	c.G112A	p.A38T	nonconservative
MSTRG.1002.1	nonsynonymous	homozygous	c.G520A	p.A174T	nonconservative
MSTRG.1002.1	synonymous	homozygous	c.A528T	p.P176P	NA
MSTRG.1002.1	synonymous	homozygous	c.C259T	p.L87L	NA
MSTRG.1002.1	synonymous	homozygous	c.C453T	p.N151N	NA
MSTRG.1002.1	synonymous	homozygous	c.G968A	p.X323X	NA
MSTRG.1002.1	synonymous	homozygous	c.T372C	p.D124D	NA
MSTRG.1002.1	synonymous	homozygous	c.T898C	p.L300L	NA
MSTRG.10020.1	nonsynonymous	homozygous	c.A118G	p.K40E	nonconservative
MSTRG.10020.1	nonsynonymous	homozygous	c.A2593G	p.I865V	conservative
MSTRG.10020.1	nonsynonymous	heterozygous	c.A898G	p.S300G	nonconservative
MSTRG.10020.1	nonsynonymous	homozygous	c.C1124T	p.A375V	conservative
MSTRG.10020.1	nonsynonymous	homozygous	c.C1306T	p.L436F	conservative
MSTRG.10020.1	nonsynonymous	heterozygous	c.C2062G	p.R688G	nonconservative
MSTRG.10020.1	nonsynonymous	homozygous	c.C2234G	p.T745S	conservative
MSTRG.10020.1	nonsynonymous	homozygous	c.C281T	p.A94V	conservative
MSTRG.10020.1	nonsynonymous	homozygous	c.C2894G	p.P965R	nonconservative
MSTRG.10020.1	nonsynonymous	homozygous	c.C556A	p.P186T	nonconservative
MSTRG.10020.1	nonsynonymous	heterozygous	c.C571A	p.P191T	nonconservative
MSTRG.10020.1	nonsynonymous	homozygous	c.C586G	p.L196V	conservative
MSTRG.10020.1	nonsynonymous	homozygous	c.G1450T	p.V484L	conservative
MSTRG.10020.1	nonsynonymous	homozygous	c.G2041A	p.D681N	nonconservative
MSTRG.10020.1	nonsynonymous	homozygous	c.G2524T	p.A842S	nonconservative
MSTRG.10020.1	nonsynonymous	homozygous	c.G2558A	p.C853Y	conservative
MSTRG.10020.1	nonsynonymous	homozygous	c.G2656C	p.E886Q	nonconservative
MSTRG.10020.1	nonsynonymous	homozygous	c.G2747A	p.R916H	conservative
MSTRG.10020.1	nonsynonymous	homozygous	c.G2906A	p.G969D	nonconservative
MSTRG.10020.1	nonsynonymous	homozygous	c.G683C	p.S228T	conservative
MSTRG.10020.1	nonsynonymous	homozygous	c.G758A	p.G253D	nonconservative
MSTRG.10020.1	nonsynonymous	homozygous	c.T113C	p.I38T	nonconservative
MSTRG.10020.1	nonsynonymous	homozygous	c.T156G	p.H52Q	nonconservative
MSTRG.10020.1	nonsynonymous	homozygous	c.T462G	p.N154K	nonconservative
MSTRG.10020.1	nonsynonymous	homozygous	c.T809C	p.V270A	conservative
MSTRG.10020.1	synonymous	homozygous	c.A1236G	p.L412L	NA
MSTRG.10020.1	synonymous	homozygous	c.A1917G	p.A639A	NA
MSTRG.10020.1	synonymous	homozygous	c.A2490G	p.E830E	NA
MSTRG.10020.1	synonymous	homozygous	c.A2544G	p.E848E	NA
MSTRG.10020.1	synonymous	homozygous	c.A2883G	p.A961A	NA
MSTRG.10020.1	synonymous	homozygous	c.A405G	p.V135V	NA
MSTRG.10020.1	synonymous	homozygous	c.A474G	p.S158S	NA
MSTRG.10020.1	synonymous	homozygous	c.A618G	p.L206L	NA
MSTRG.10020.1	synonymous	homozygous	c.A642T	p.P214P	NA
MSTRG.10020.1	synonymous	heterozygous	c.A871C	p.R291R	NA
MSTRG.10020.1	synonymous	homozygous	c.A939G	p.R313R	NA
MSTRG.10020.1	synonymous	homozygous	c.C1572T	p.V524V	NA
MSTRG.10020.1	synonymous	homozygous	c.C1608T	p.R536R	NA
MSTRG.10020.1	synonymous	homozygous	c.C1800T	p.A600A	NA
MSTRG.10020.1	synonymous	homozygous	c.C1821T	p.A607A	NA
MSTRG.10020.1	synonymous	homozygous	c.C2082T	p.F694F	NA
MSTRG.10020.1	synonymous	homozygous	c.C2856T	p.C952C	NA
MSTRG.10020.1	synonymous	homozygous	c.C2886T	p.V962V	NA
MSTRG.10020.1	synonymous	homozygous	c.C444T	p.P148P	NA
MSTRG.10020.1	synonymous	homozygous	c.C486A	p.T162T	NA
MSTRG.10020.1	synonymous	homozygous	c.C876T	p.I292I	NA
MSTRG.10020.1	synonymous	homozygous	c.G120A	p.K40K	NA
MSTRG.10020.1	synonymous	homozygous	c.G1344C	p.R448R	NA
MSTRG.10020.1	synonymous	homozygous	c.G1512A	p.A504A	NA
MSTRG.10020.1	synonymous	homozygous	c.G1593C	p.V531V	NA
MSTRG.10020.1	synonymous	homozygous	c.G1758A	p.E586E	NA
MSTRG.10020.1	synonymous	homozygous	c.G195A	p.Q65Q	NA
MSTRG.10020.1	synonymous	heterozygous	c.G1968A	p.R656R	NA
MSTRG.10020.1	synonymous	homozygous	c.G2469A	p.K823K	NA
MSTRG.10020.1	synonymous	homozygous	c.G2823A	p.G941G	NA
MSTRG.10020.1	synonymous	homozygous	c.G2853A	p.V951V	NA
MSTRG.10020.1	synonymous	homozygous	c.G849A	p.K283K	NA
MSTRG.10020.1	synonymous	homozygous	c.T1422A	p.V474V	NA
MSTRG.10020.1	synonymous	homozygous	c.T1543C	p.L515L	NA
MSTRG.10020.1	synonymous	homozygous	c.T1809C	p.L603L	NA
MSTRG.10020.1	synonymous	homozygous	c.T2121G	p.S707S	NA
MSTRG.10020.1	synonymous	homozygous	c.T2304C	p.D768D	NA
MSTRG.10020.1	synonymous	homozygous	c.T531C	p.S177S	NA
MSTRG.10020.1	synonymous	heterozygous	c.T972G	p.A324A	NA
MSTRG.10021.1	nonsynonymous	homozygous	c.A2256C	p.R752S	nonconservative
MSTRG.10021.1	nonsynonymous	homozygous	c.A2300G	p.H767R	conservative
MSTRG.10021.1	nonsynonymous	homozygous	c.A2461G	p.S821G	nonconservative
MSTRG.10021.1	nonsynonymous	homozygous	c.A2683T	p.I895F	conservative
MSTRG.10021.1	nonsynonymous	homozygous	c.A2785G	p.I929V	conservative
MSTRG.10021.1	nonsynonymous	homozygous	c.A2936G	p.D979G	nonconservative
MSTRG.10021.1	nonsynonymous	homozygous	c.A3446G	p.H1149R	conservative
MSTRG.10021.1	nonsynonymous	homozygous	c.C1714T	p.H572Y	nonconservative
MSTRG.10021.1	nonsynonymous	homozygous	c.G236A	p.R79K	conservative
MSTRG.10021.1	nonsynonymous	homozygous	c.G2389A	p.D797N	nonconservative
MSTRG.10021.1	nonsynonymous	homozygous	c.G2396A	p.G799E	nonconservative
MSTRG.10021.1	nonsynonymous	homozygous	c.G3694A	p.A1232T	nonconservative
MSTRG.10021.1	nonsynonymous	homozygous	c.G3784A	p.A1262T	nonconservative
MSTRG.10021.1	nonsynonymous	homozygous	c.G936T	p.M312I	conservative
MSTRG.10021.1	nonsynonymous	homozygous	c.T1544G	p.V515G	conservative
MSTRG.10021.1	nonsynonymous	heterozygous	c.T2387C	p.V796A	conservative
MSTRG.10021.1	nonsynonymous	homozygous	c.T2891C	p.M964T	nonconservative
MSTRG.10021.1	nonsynonymous	homozygous	c.T2999C	p.L1000P	conservative
MSTRG.10021.1	nonsynonymous	heterozygous	c.T727G	p.S243A	nonconservative
MSTRG.10021.1	nonsynonymous	homozygous	c.T903A	p.D301E	conservative
MSTRG.10021.1	synonymous	homozygous	c.A120G	p.T40T	NA
MSTRG.10021.1	synonymous	homozygous	c.A1506G	p.E502E	NA
MSTRG.10021.1	synonymous	homozygous	c.A2535G	p.E845E	NA
MSTRG.10021.1	synonymous	homozygous	c.A3231G	p.T1077T	NA
MSTRG.10021.1	synonymous	homozygous	c.A3261G	p.L1087L	NA
MSTRG.10021.1	synonymous	homozygous	c.A3300G	p.Q1100Q	NA
MSTRG.10021.1	synonymous	homozygous	c.A342G	p.Q114Q	NA
MSTRG.10021.1	synonymous	homozygous	c.A3441G	p.L1147L	NA
MSTRG.10021.1	synonymous	homozygous	c.A3513G	p.G1171G	NA
MSTRG.10021.1	synonymous	homozygous	c.A3522G	p.V1174V	NA
MSTRG.10021.1	synonymous	homozygous	c.A3609G	p.A1203A	NA
MSTRG.10021.1	synonymous	homozygous	c.A372G	p.E124E	NA
MSTRG.10021.1	synonymous	homozygous	c.A3918G	p.R1306R	NA
MSTRG.10021.1	synonymous	homozygous	c.A3936G	p.L1312L	NA
MSTRG.10021.1	synonymous	homozygous	c.A717T	p.A239A	NA
MSTRG.10021.1	synonymous	homozygous	c.A960G	p.T320T	NA
MSTRG.10021.1	synonymous	homozygous	c.C1287T	p.C429C	NA
MSTRG.10021.1	synonymous	homozygous	c.C1818T	p.D606D	NA
MSTRG.10021.1	synonymous	homozygous	c.C1875G	p.S625S	NA
MSTRG.10021.1	synonymous	homozygous	c.C2179T	p.L727L	NA
MSTRG.10021.1	synonymous	homozygous	c.C2481T	p.T827T	NA
MSTRG.10021.1	synonymous	homozygous	c.C2745T	p.F915F	NA
MSTRG.10021.1	synonymous	homozygous	c.C3615T	p.F1205F	NA
MSTRG.10021.1	synonymous	homozygous	c.C87T	p.V29V	NA
MSTRG.10021.1	synonymous	homozygous	c.G1434T	p.A478A	NA
MSTRG.10021.1	synonymous	homozygous	c.G2616C	p.L872L	NA
MSTRG.10021.1	synonymous	homozygous	c.G444A	p.E148E	NA
MSTRG.10021.1	synonymous	homozygous	c.G492A	p.A164A	NA
MSTRG.10021.1	synonymous	homozygous	c.T1065C	p.A355A	NA
MSTRG.10021.1	synonymous	homozygous	c.T1098C	p.P366P	NA
MSTRG.10021.1	synonymous	homozygous	c.T1515G	p.V505V	NA
MSTRG.10021.1	synonymous	homozygous	c.T159C	p.L53L	NA
MSTRG.10021.1	synonymous	homozygous	c.T1824C	p.D608D	NA
MSTRG.10021.1	synonymous	homozygous	c.T1980C	p.V660V	NA
MSTRG.10021.1	synonymous	homozygous	c.T1998C	p.N666N	NA
MSTRG.10021.1	synonymous	homozygous	c.T2491C	p.L831L	NA
MSTRG.10021.1	synonymous	homozygous	c.T2586C	p.T862T	NA
MSTRG.10021.1	synonymous	homozygous	c.T2784C	p.S928S	NA
MSTRG.10021.1	synonymous	homozygous	c.T2823C	p.F941F	NA
MSTRG.10021.1	synonymous	homozygous	c.T3057C	p.N1019N	NA
MSTRG.10021.1	synonymous	homozygous	c.T3147C	p.S1049S	NA
MSTRG.10021.1	synonymous	homozygous	c.T366C	p.D122D	NA
MSTRG.10021.1	synonymous	homozygous	c.T522C	p.Y174Y	NA
MSTRG.10022.1	nonsynonymous	homozygous	c.G20C	p.G7A	conservative
MSTRG.10022.1	nonsynonymous	homozygous	c.T124C	p.S42P	nonconservative
MSTRG.10022.1	synonymous	homozygous	c.A303G	p.K101K	NA
MSTRG.10022.1	synonymous	heterozygous	c.C192T	p.N64N	NA
MSTRG.10022.1	synonymous	homozygous	c.C195T	p.V65V	NA
MSTRG.10022.1	synonymous	homozygous	c.G114A	p.E38E	NA
MSTRG.10022.1	synonymous	homozygous	c.T324A	p.S108S	NA
MSTRG.10023.1	nonsynonymous	homozygous	c.T17C	p.V6A	conservative
MSTRG.10023.1	synonymous	homozygous	c.A210G	p.E70E	NA
MSTRG.10023.1	synonymous	homozygous	c.A261G	p.G87G	NA
MSTRG.10023.1	synonymous	homozygous	c.A507G	p.L169L	NA
MSTRG.10023.1	synonymous	homozygous	c.A72G	p.R24R	NA
MSTRG.10023.1	synonymous	homozygous	c.A813G	p.L271L	NA
MSTRG.10023.1	synonymous	homozygous	c.C79T	p.L27L	NA
MSTRG.10023.1	synonymous	homozygous	c.G360C	p.R120R	NA
MSTRG.10023.1	synonymous	homozygous	c.G900A	p.L300L	NA
MSTRG.10023.1	synonymous	homozygous	c.T1008C	p.D336D	NA
MSTRG.10023.1	synonymous	homozygous	c.T636C	p.S212S	NA
MSTRG.10025.1	nonsynonymous	homozygous	c.A257G	p.K86R	conservative
MSTRG.10025.1	nonsynonymous	homozygous	c.G275A	p.R92K	conservative
MSTRG.10025.1	nonsynonymous	homozygous	c.G3C	p.M1I	conservative
MSTRG.10025.1	nonsynonymous	homozygous	c.G4A	p.G2S	nonconservative
MSTRG.10025.1	nonsynonymous	homozygous	c.G525A	p.M175I	conservative
MSTRG.10025.1	synonymous	homozygous	c.C424T	p.L142L	NA
MSTRG.10025.1	synonymous	homozygous	c.G69A	p.R23R	NA
MSTRG.10025.1	synonymous	homozygous	c.T369C	p.F123F	NA
MSTRG.10025.2	nonsynonymous	homozygous	c.A257G	p.K86R	conservative
MSTRG.10025.2	nonsynonymous	homozygous	c.A689G	p.N230S	conservative
MSTRG.10025.2	nonsynonymous	homozygous	c.A710C	p.E237A	nonconservative
MSTRG.10025.2	nonsynonymous	homozygous	c.A815G	p.K272R	conservative
MSTRG.10025.2	nonsynonymous	homozygous	c.A894G	p.I298M	conservative
MSTRG.10025.2	nonsynonymous	homozygous	c.G275A	p.R92K	conservative
MSTRG.10025.2	nonsynonymous	homozygous	c.G3C	p.M1I	conservative
MSTRG.10025.2	nonsynonymous	homozygous	c.G4A	p.G2S	nonconservative
MSTRG.10025.2	nonsynonymous	heterozygous	c.G671A	p.R224H	conservative
MSTRG.10025.2	nonsynonymous	homozygous	c.G677A	p.S226N	conservative
MSTRG.10025.2	nonsynonymous	homozygous	c.T925G	p.S309A	nonconservative
MSTRG.10025.2	synonymous	homozygous	c.A663T	p.G221G	NA
MSTRG.10025.2	synonymous	homozygous	c.C424T	p.L142L	NA
MSTRG.10025.2	synonymous	homozygous	c.G69A	p.R23R	NA
MSTRG.10025.2	synonymous	homozygous	c.G801T	p.A267A	NA
MSTRG.10025.2	synonymous	homozygous	c.T369C	p.F123F	NA
MSTRG.10025.2	synonymous	homozygous	c.T837G	p.P279P	NA
MSTRG.10026.1	nonsynonymous	homozygous	c.G151A	p.G51S	nonconservative
MSTRG.10026.1	nonsynonymous	homozygous	c.G160A	p.A54T	nonconservative
MSTRG.10026.1	synonymous	homozygous	c.A138G	p.E46E	NA
MSTRG.10026.1	synonymous	homozygous	c.T156C	p.I52I	NA
MSTRG.10027.1	nonsynonymous	homozygous	c.C452A	p.P151H	nonconservative
MSTRG.10027.1	nonsynonymous	homozygous	c.T590C	p.V197A	conservative
MSTRG.10027.1	synonymous	homozygous	c.A630G	p.V210V	NA
MSTRG.10027.1	synonymous	homozygous	c.C489A	p.I163I	NA
MSTRG.10028.1	nonsynonymous	homozygous	c.A892G	p.T298A	nonconservative
MSTRG.10028.1	nonsynonymous	homozygous	c.G242A	p.G81E	nonconservative
MSTRG.10028.1	synonymous	homozygous	c.A462T	p.S154S	NA
MSTRG.10028.1	synonymous	homozygous	c.A807G	p.V269V	NA
MSTRG.10028.1	synonymous	homozygous	c.C1146T	p.R382R	NA
MSTRG.10028.1	synonymous	homozygous	c.G1287A	p.E429E	NA
MSTRG.10028.1	synonymous	homozygous	c.G1325A	p.X442X	NA
MSTRG.10028.1	synonymous	homozygous	c.G168A	p.Q56Q	NA
MSTRG.10028.1	synonymous	homozygous	c.G618A	p.G206G	NA
MSTRG.10028.1	synonymous	homozygous	c.G651A	p.P217P	NA
MSTRG.10028.1	synonymous	homozygous	c.T1312C	p.L438L	NA
MSTRG.10028.1	synonymous	homozygous	c.T459C	p.A153A	NA
MSTRG.10029.1	nonsynonymous	homozygous	c.A1165T	p.I389L	conservative
MSTRG.10029.1	nonsynonymous	homozygous	c.A1211G	p.D404G	nonconservative
MSTRG.10029.1	nonsynonymous	homozygous	c.A1377T	p.Q459H	nonconservative
MSTRG.10029.1	nonsynonymous	homozygous	c.A1400G	p.N467S	conservative
MSTRG.10029.1	nonsynonymous	homozygous	c.A17G	p.K6R	conservative
MSTRG.10029.1	nonsynonymous	homozygous	c.A79G	p.I27V	conservative
MSTRG.10029.1	nonsynonymous	homozygous	c.G1282A	p.A428T	nonconservative
MSTRG.10029.1	nonsynonymous	homozygous	c.T1360A	p.C454S	conservative
MSTRG.10029.1	synonymous	homozygous	c.A222G	p.L74L	NA
MSTRG.10029.1	synonymous	homozygous	c.A36G	p.E12E	NA
MSTRG.10029.1	synonymous	homozygous	c.A468T	p.I156I	NA
MSTRG.10029.1	synonymous	homozygous	c.C1515T	p.G505G	NA
MSTRG.10029.1	synonymous	homozygous	c.C351T	p.F117F	NA
MSTRG.10029.1	synonymous	homozygous	c.C783A	p.T261T	NA
MSTRG.10029.1	synonymous	homozygous	c.C943T	p.L315L	NA
MSTRG.10029.1	synonymous	homozygous	c.G1272A	p.V424V	NA
MSTRG.10029.1	synonymous	homozygous	c.G1392A	p.L464L	NA
MSTRG.10029.1	synonymous	homozygous	c.G1512A	p.S504S	NA
MSTRG.10029.1	synonymous	homozygous	c.G426C	p.V142V	NA
MSTRG.10029.1	synonymous	homozygous	c.G681A	p.K227K	NA
MSTRG.10029.1	synonymous	homozygous	c.T1404C	p.S468S	NA
MSTRG.10029.1	synonymous	homozygous	c.T162C	p.N54N	NA
MSTRG.10029.1	synonymous	homozygous	c.T201A	p.L67L	NA
MSTRG.10029.1	synonymous	homozygous	c.T393C	p.I131I	NA
MSTRG.1003.1	nonsynonymous	homozygous	c.A1292T	p.D431V	nonconservative
MSTRG.1003.1	nonsynonymous	homozygous	c.A1516C	p.K506Q	nonconservative
MSTRG.1003.1	nonsynonymous	homozygous	c.A2192G	p.K731R	conservative
MSTRG.1003.1	nonsynonymous	homozygous	c.A2203G	p.T735A	nonconservative
MSTRG.1003.1	nonsynonymous	homozygous	c.A3250T	p.N1084Y	conservative
MSTRG.1003.1	nonsynonymous	homozygous	c.C1082T	p.S361L	nonconservative
MSTRG.1003.1	nonsynonymous	homozygous	c.C2183G	p.A728G	conservative
MSTRG.1003.1	nonsynonymous	homozygous	c.C2330T	p.T777I	nonconservative
MSTRG.1003.1	nonsynonymous	homozygous	c.C2386T	p.L796F	conservative
MSTRG.1003.1	nonsynonymous	homozygous	c.C418T	p.H140Y	nonconservative
MSTRG.1003.1	nonsynonymous	homozygous	c.C605T	p.S202F	nonconservative
MSTRG.1003.1	nonsynonymous	homozygous	c.G1022A	p.R341H	conservative
MSTRG.1003.1	nonsynonymous	homozygous	c.G1117A	p.V373M	conservative
MSTRG.1003.1	nonsynonymous	homozygous	c.G1404C	p.E468D	conservative
MSTRG.1003.1	nonsynonymous	homozygous	c.G1424A	p.R475K	conservative
MSTRG.1003.1	nonsynonymous	homozygous	c.G1536C	p.E512D	conservative
MSTRG.1003.1	nonsynonymous	homozygous	c.G1985A	p.R662K	conservative
MSTRG.1003.1	nonsynonymous	homozygous	c.G2448T	p.Q816H	nonconservative
MSTRG.1003.1	nonsynonymous	homozygous	c.G2569A	p.V857I	conservative
MSTRG.1003.1	nonsynonymous	homozygous	c.G2659C	p.D887H	nonconservative
MSTRG.1003.1	nonsynonymous	homozygous	c.G79T	p.A27S	nonconservative
MSTRG.1003.1	nonsynonymous	homozygous	c.T1584G	p.H528Q	nonconservative
MSTRG.1003.1	nonsynonymous	homozygous	c.T2354C	p.I785T	nonconservative
MSTRG.1003.1	nonsynonymous	homozygous	c.T2438A	p.V813D	nonconservative
MSTRG.1003.1	nonsynonymous	homozygous	c.T3106C	p.F1036L	conservative
MSTRG.1003.1	nonsynonymous	homozygous	c.T3172C	p.Y1058H	nonconservative
MSTRG.1003.1	nonsynonymous	homozygous	c.T395C	p.I132T	nonconservative
MSTRG.1003.1	synonymous	homozygous	c.A1380G	p.R460R	NA
MSTRG.1003.1	synonymous	homozygous	c.A2682G	p.E894E	NA
MSTRG.1003.1	synonymous	homozygous	c.A2919G	p.K973K	NA
MSTRG.1003.1	synonymous	homozygous	c.A303G	p.L101L	NA
MSTRG.1003.1	synonymous	homozygous	c.A3288G	p.P1096P	NA
MSTRG.1003.1	synonymous	homozygous	c.A3384G	p.P1128P	NA
MSTRG.1003.1	synonymous	homozygous	c.C2175T	p.V725V	NA
MSTRG.1003.1	synonymous	homozygous	c.C225T	p.V75V	NA
MSTRG.1003.1	synonymous	homozygous	c.C2343T	p.F781F	NA
MSTRG.1003.1	synonymous	homozygous	c.C2395T	p.L799L	NA
MSTRG.1003.1	synonymous	homozygous	c.C2427T	p.A809A	NA
MSTRG.1003.1	synonymous	homozygous	c.C2523T	p.G841G	NA
MSTRG.1003.1	synonymous	homozygous	c.C2661T	p.D887D	NA
MSTRG.1003.1	synonymous	homozygous	c.C2896T	p.L966L	NA
MSTRG.1003.1	synonymous	homozygous	c.C3430T	p.L1144L	NA
MSTRG.1003.1	synonymous	homozygous	c.C850T	p.L284L	NA
MSTRG.1003.1	synonymous	homozygous	c.C991A	p.R331R	NA
MSTRG.1003.1	synonymous	homozygous	c.G1119A	p.V373V	NA
MSTRG.1003.1	synonymous	homozygous	c.G1278A	p.Q426Q	NA
MSTRG.1003.1	synonymous	homozygous	c.G1986A	p.R662R	NA
MSTRG.1003.1	synonymous	heterozygous	c.G2187A	p.K729K	NA
MSTRG.1003.1	synonymous	homozygous	c.G2256A	p.G752G	NA
MSTRG.1003.1	synonymous	homozygous	c.G2850A	p.L950L	NA
MSTRG.1003.1	synonymous	homozygous	c.G3015A	p.T1005T	NA
MSTRG.1003.1	synonymous	homozygous	c.G3072A	p.V1024V	NA
MSTRG.1003.1	synonymous	homozygous	c.T1524C	p.D508D	NA
MSTRG.1003.1	synonymous	homozygous	c.T1701C	p.I567I	NA
MSTRG.1003.1	synonymous	homozygous	c.T2058C	p.S686S	NA
MSTRG.1003.1	synonymous	homozygous	c.T2388C	p.L796L	NA
MSTRG.1003.1	synonymous	homozygous	c.T2835C	p.L945L	NA
MSTRG.1003.1	synonymous	homozygous	c.T2958C	p.C986C	NA
MSTRG.1003.1	synonymous	homozygous	c.T3063C	p.I1021I	NA
MSTRG.1003.1	synonymous	homozygous	c.T3202C	p.L1068L	NA
MSTRG.1003.1	synonymous	homozygous	c.T3258C	p.A1086A	NA
MSTRG.10030.1	nonsynonymous	homozygous	c.A475G	p.I159V	conservative
MSTRG.10030.1	nonsynonymous	homozygous	c.A547G	p.I183V	conservative
MSTRG.10030.1	nonsynonymous	homozygous	c.C136A	p.P46T	nonconservative
MSTRG.10030.1	nonsynonymous	homozygous	c.T3010C	p.S1004P	nonconservative
MSTRG.10030.1	synonymous	homozygous	c.A1374G	p.L458L	NA
MSTRG.10030.1	synonymous	homozygous	c.A1446G	p.G482G	NA
MSTRG.10030.1	synonymous	homozygous	c.A2022C	p.A674A	NA
MSTRG.10030.1	synonymous	homozygous	c.A2193G	p.Q731Q	NA
MSTRG.10030.1	synonymous	homozygous	c.A2241G	p.L747L	NA
MSTRG.10030.1	synonymous	homozygous	c.A267G	p.L89L	NA
MSTRG.10030.1	synonymous	homozygous	c.A2772G	p.K924K	NA
MSTRG.10030.1	synonymous	homozygous	c.A2949G	p.T983T	NA
MSTRG.10030.1	synonymous	homozygous	c.A384G	p.S128S	NA
MSTRG.10030.1	synonymous	homozygous	c.C1071T	p.Y357Y	NA
MSTRG.10030.1	synonymous	homozygous	c.C1536T	p.A512A	NA
MSTRG.10030.1	synonymous	homozygous	c.C1695T	p.D565D	NA
MSTRG.10030.1	synonymous	homozygous	c.C3033G	p.G1011G	NA
MSTRG.10030.1	synonymous	homozygous	c.G150A	p.L50L	NA
MSTRG.10030.1	synonymous	homozygous	c.G1680A	p.V560V	NA
MSTRG.10030.1	synonymous	homozygous	c.G222A	p.G74G	NA
MSTRG.10030.1	synonymous	heterozygous	c.G2715A	p.L905L	NA
MSTRG.10030.1	synonymous	homozygous	c.G408A	p.Q136Q	NA
MSTRG.10030.1	synonymous	homozygous	c.G645T	p.L215L	NA
MSTRG.10030.1	synonymous	homozygous	c.G690A	p.K230K	NA
MSTRG.10030.1	synonymous	homozygous	c.G942A	p.K314K	NA
MSTRG.10030.1	synonymous	homozygous	c.G975A	p.K325K	NA
MSTRG.10030.1	synonymous	homozygous	c.T1101A	p.R367R	NA
MSTRG.10030.1	synonymous	homozygous	c.T1104C	p.V368V	NA
MSTRG.10030.1	synonymous	homozygous	c.T2154C	p.L718L	NA
MSTRG.10030.1	synonymous	homozygous	c.T2226C	p.A742A	NA
MSTRG.10030.1	synonymous	heterozygous	c.T2742C	p.S914S	NA
MSTRG.10030.1	synonymous	homozygous	c.T2961G	p.S987S	NA
MSTRG.10030.1	synonymous	homozygous	c.T3162C	p.R1054R	NA
MSTRG.10030.1	synonymous	homozygous	c.T3315C	p.N1105N	NA
MSTRG.10030.1	synonymous	homozygous	c.T570C	p.V190V	NA
MSTRG.10031.1	nonsynonymous	homozygous	c.A122G	p.E41G	nonconservative
MSTRG.10031.1	nonsynonymous	homozygous	c.A172G	p.R58G	nonconservative
MSTRG.10031.1	nonsynonymous	homozygous	c.C419G	p.T140S	conservative
MSTRG.10031.1	nonsynonymous	homozygous	c.T238A	p.F80I	conservative
MSTRG.10031.1	nonsynonymous	homozygous	c.T353C	p.V118A	conservative
MSTRG.10031.1	nonsynonymous	homozygous	c.T464C	p.I155T	nonconservative
MSTRG.10031.1	synonymous	homozygous	c.A294G	p.Q98Q	NA
MSTRG.10031.1	synonymous	homozygous	c.A518G	p.X173X	NA
MSTRG.10031.1	synonymous	homozygous	c.C207T	p.I69I	NA
MSTRG.10031.1	synonymous	homozygous	c.C396T	p.S132S	NA
MSTRG.10031.1	synonymous	homozygous	c.T180C	p.L60L	NA
MSTRG.10031.1	synonymous	homozygous	c.T189A	p.V63V	NA
MSTRG.10031.2	nonsynonymous	homozygous	c.A122G	p.E41G	nonconservative
MSTRG.10031.2	nonsynonymous	homozygous	c.A292G	p.R98G	nonconservative
MSTRG.10031.2	nonsynonymous	homozygous	c.C539G	p.T180S	conservative
MSTRG.10031.2	nonsynonymous	homozygous	c.T358A	p.F120I	conservative
MSTRG.10031.2	nonsynonymous	homozygous	c.T473C	p.V158A	conservative
MSTRG.10031.2	nonsynonymous	homozygous	c.T584C	p.I195T	nonconservative
MSTRG.10031.2	synonymous	homozygous	c.A414G	p.Q138Q	NA
MSTRG.10031.2	synonymous	homozygous	c.A638G	p.X213X	NA
MSTRG.10031.2	synonymous	homozygous	c.C168T	p.I56I	NA
MSTRG.10031.2	synonymous	homozygous	c.C192T	p.R64R	NA
MSTRG.10031.2	synonymous	homozygous	c.C327T	p.I109I	NA
MSTRG.10031.2	synonymous	homozygous	c.C516T	p.S172S	NA
MSTRG.10031.2	synonymous	homozygous	c.G150A	p.V50V	NA
MSTRG.10031.2	synonymous	homozygous	c.T300C	p.L100L	NA
MSTRG.10031.2	synonymous	homozygous	c.T309A	p.V103V	NA
MSTRG.10034.1	nonsynonymous	homozygous	c.A1139G	p.K380R	conservative
MSTRG.10034.1	nonsynonymous	homozygous	c.A1286G	p.N429S	conservative
MSTRG.10034.1	nonsynonymous	homozygous	c.A1296T	p.L432F	conservative
MSTRG.10034.1	nonsynonymous	homozygous	c.A139G	p.T47A	nonconservative
MSTRG.10034.1	nonsynonymous	homozygous	c.C1015G	p.L339V	conservative
MSTRG.10034.1	nonsynonymous	homozygous	c.C1160T	p.A387V	conservative
MSTRG.10034.1	nonsynonymous	homozygous	c.C1567G	p.Q523E	nonconservative
MSTRG.10034.1	nonsynonymous	homozygous	c.C675G	p.F225L	conservative
MSTRG.10034.1	nonsynonymous	homozygous	c.G1111C	p.V371L	conservative
MSTRG.10034.1	nonsynonymous	homozygous	c.G1288A	p.E430K	nonconservative
MSTRG.10034.1	nonsynonymous	homozygous	c.G133C	p.A45P	conservative
MSTRG.10034.1	nonsynonymous	homozygous	c.G271A	p.E91K	nonconservative
MSTRG.10034.1	nonsynonymous	homozygous	c.G956A	p.R319K	conservative
MSTRG.10034.1	nonsynonymous	homozygous	c.T1121A	p.L374H	nonconservative
MSTRG.10034.1	nonsynonymous	homozygous	c.T263G	p.V88G	conservative
MSTRG.10034.1	nonsynonymous	homozygous	c.T274C	p.S92P	nonconservative
MSTRG.10034.1	nonsynonymous	homozygous	c.T283C	p.F95L	conservative
MSTRG.10034.1	nonsynonymous	homozygous	c.T308C	p.L103S	nonconservative
MSTRG.10034.1	synonymous	homozygous	c.A1605G	p.R535R	NA
MSTRG.10034.1	synonymous	homozygous	c.A207G	p.L69L	NA
MSTRG.10034.1	synonymous	homozygous	c.A879G	p.E293E	NA
MSTRG.10034.1	synonymous	homozygous	c.C1578T	p.R526R	NA
MSTRG.10034.1	synonymous	homozygous	c.C1671T	p.N557N	NA
MSTRG.10034.1	synonymous	homozygous	c.C1674T	p.V558V	NA
MSTRG.10034.1	synonymous	homozygous	c.C171T	p.G57G	NA
MSTRG.10034.1	synonymous	homozygous	c.C654T	p.C218C	NA
MSTRG.10034.1	synonymous	homozygous	c.C667T	p.L223L	NA
MSTRG.10034.1	synonymous	homozygous	c.C874T	p.L292L	NA
MSTRG.10034.1	synonymous	homozygous	c.C975T	p.S325S	NA
MSTRG.10034.1	synonymous	homozygous	c.G1302A	p.R434R	NA
MSTRG.10034.1	synonymous	homozygous	c.G1446A	p.L482L	NA
MSTRG.10034.1	synonymous	homozygous	c.G1779C	p.P593P	NA
MSTRG.10034.1	synonymous	homozygous	c.G963A	p.L321L	NA
MSTRG.10034.1	synonymous	homozygous	c.T1011C	p.F337F	NA
MSTRG.10034.1	synonymous	homozygous	c.T1113C	p.V371V	NA
MSTRG.10034.1	synonymous	homozygous	c.T1224C	p.N408N	NA
MSTRG.10034.1	synonymous	homozygous	c.T1371A	p.S457S	NA
MSTRG.10034.1	synonymous	homozygous	c.T312C	p.Y104Y	NA
MSTRG.10034.1	synonymous	homozygous	c.T318C	p.V106V	NA
MSTRG.10034.1	synonymous	homozygous	c.T570G	p.S190S	NA
MSTRG.10034.1	synonymous	homozygous	c.T906G	p.S302S	NA
MSTRG.10036.1	nonsynonymous	homozygous	c.A1465G	p.I489V	conservative
MSTRG.10036.1	nonsynonymous	homozygous	c.A1732G	p.I578V	conservative
MSTRG.10036.1	nonsynonymous	homozygous	c.A1778T	p.D593V	nonconservative
MSTRG.10036.1	nonsynonymous	homozygous	c.A1969T	p.N657Y	conservative
MSTRG.10036.1	nonsynonymous	homozygous	c.A2492G	p.N831S	conservative
MSTRG.10036.1	nonsynonymous	homozygous	c.A290G	p.N97S	conservative
MSTRG.10036.1	nonsynonymous	homozygous	c.A562G	p.I188V	conservative
MSTRG.10036.1	nonsynonymous	homozygous	c.A969G	p.I323M	conservative
MSTRG.10036.1	nonsynonymous	homozygous	c.C109G	p.H37D	nonconservative
MSTRG.10036.1	nonsynonymous	homozygous	c.C122T	p.P41L	conservative
MSTRG.10036.1	nonsynonymous	homozygous	c.C1927T	p.L643F	conservative
MSTRG.10036.1	nonsynonymous	homozygous	c.C2004A	p.D668E	conservative
MSTRG.10036.1	nonsynonymous	homozygous	c.C205A	p.L69I	conservative
MSTRG.10036.1	nonsynonymous	homozygous	c.C2326G	p.L776V	conservative
MSTRG.10036.1	nonsynonymous	homozygous	c.C458G	p.A153G	conservative
MSTRG.10036.1	nonsynonymous	homozygous	c.G1735A	p.A579T	nonconservative
MSTRG.10036.1	nonsynonymous	homozygous	c.G2565C	p.L855F	conservative
MSTRG.10036.1	nonsynonymous	homozygous	c.G565A	p.V189I	conservative
MSTRG.10036.1	nonsynonymous	homozygous	c.G589A	p.A197T	nonconservative
MSTRG.10036.1	synonymous	homozygous	c.A1134G	p.A378A	NA
MSTRG.10036.1	synonymous	homozygous	c.A1233G	p.K411K	NA
MSTRG.10036.1	synonymous	homozygous	c.A1542G	p.R514R	NA
MSTRG.10036.1	synonymous	homozygous	c.A1731G	p.A577A	NA
MSTRG.10036.1	synonymous	homozygous	c.A2307G	p.R769R	NA
MSTRG.10036.1	synonymous	homozygous	c.A2409T	p.V803V	NA
MSTRG.10036.1	synonymous	homozygous	c.A297G	p.V99V	NA
MSTRG.10036.1	synonymous	homozygous	c.A543T	p.I181I	NA
MSTRG.10036.1	synonymous	homozygous	c.A789C	p.R263R	NA
MSTRG.10036.1	synonymous	homozygous	c.A825G	p.L275L	NA
MSTRG.10036.1	synonymous	homozygous	c.A936G	p.E312E	NA
MSTRG.10036.1	synonymous	homozygous	c.A987G	p.T329T	NA
MSTRG.10036.1	synonymous	homozygous	c.C1023T	p.N341N	NA
MSTRG.10036.1	synonymous	homozygous	c.C1077T	p.V359V	NA
MSTRG.10036.1	synonymous	homozygous	c.C1143T	p.I381I	NA
MSTRG.10036.1	synonymous	homozygous	c.C1624T	p.L542L	NA
MSTRG.10036.1	synonymous	homozygous	c.C1668T	p.L556L	NA
MSTRG.10036.1	synonymous	homozygous	c.C1707T	p.V569V	NA
MSTRG.10036.1	synonymous	homozygous	c.C636T	p.I212I	NA
MSTRG.10036.1	synonymous	homozygous	c.C864T	p.T288T	NA
MSTRG.10036.1	synonymous	homozygous	c.C870A	p.S290S	NA
MSTRG.10036.1	synonymous	homozygous	c.G1107A	p.P369P	NA
MSTRG.10036.1	synonymous	homozygous	c.G1242A	p.P414P	NA
MSTRG.10036.1	synonymous	homozygous	c.G168A	p.Q56Q	NA
MSTRG.10036.1	synonymous	homozygous	c.G2007A	p.G669G	NA
MSTRG.10036.1	synonymous	homozygous	c.G246A	p.R82R	NA
MSTRG.10036.1	synonymous	homozygous	c.G33A	p.V11V	NA
MSTRG.10036.1	synonymous	homozygous	c.G378A	p.L126L	NA
MSTRG.10036.1	synonymous	homozygous	c.G960A	p.G320G	NA
MSTRG.10036.1	synonymous	homozygous	c.T1284C	p.H428H	NA
MSTRG.10036.1	synonymous	homozygous	c.T1440C	p.I480I	NA
MSTRG.10036.1	synonymous	homozygous	c.T2274C	p.P758P	NA
MSTRG.10036.1	synonymous	homozygous	c.T531G	p.V177V	NA
MSTRG.10036.1	synonymous	homozygous	c.T549C	p.I183I	NA
MSTRG.10037.1	nonsynonymous	homozygous	c.G1348A	p.E450K	nonconservative
MSTRG.10037.1	nonsynonymous	homozygous	c.G1357A	p.V453I	conservative
MSTRG.10037.1	nonsynonymous	homozygous	c.G406C	p.G136R	nonconservative
MSTRG.10037.1	nonsynonymous	homozygous	c.T1184C	p.V395A	conservative
MSTRG.10037.1	synonymous	homozygous	c.A1047G	p.G349G	NA
MSTRG.10037.1	synonymous	homozygous	c.A1194T	p.A398A	NA
MSTRG.10037.1	synonymous	homozygous	c.A1284G	p.K428K	NA
MSTRG.10037.1	synonymous	homozygous	c.A1383G	p.L461L	NA
MSTRG.10037.1	synonymous	homozygous	c.A309G	p.Q103Q	NA
MSTRG.10037.1	synonymous	homozygous	c.C159T	p.V53V	NA
MSTRG.10037.1	synonymous	homozygous	c.C639T	p.V213V	NA
MSTRG.10037.1	synonymous	homozygous	c.G201A	p.K67K	NA
MSTRG.10037.1	synonymous	homozygous	c.G513A	p.E171E	NA
MSTRG.10037.1	synonymous	homozygous	c.G696C	p.A232A	NA
MSTRG.10037.1	synonymous	homozygous	c.T1080G	p.S360S	NA
MSTRG.10037.1	synonymous	homozygous	c.T1305C	p.D435D	NA
MSTRG.10038.1	nonsynonymous	homozygous	c.A88C	p.I30L	conservative
MSTRG.10038.1	nonsynonymous	homozygous	c.C1606T	p.H536Y	nonconservative
MSTRG.10038.1	nonsynonymous	homozygous	c.G1471A	p.V491I	conservative
MSTRG.10038.1	synonymous	homozygous	c.A1107G	p.V369V	NA
MSTRG.10038.1	synonymous	homozygous	c.C1509A	p.G503G	NA
MSTRG.10038.1	synonymous	homozygous	c.G957A	p.P319P	NA
MSTRG.10038.1	synonymous	homozygous	c.G975A	p.L325L	NA
MSTRG.10038.1	synonymous	homozygous	c.T1446C	p.D482D	NA
MSTRG.10038.1	synonymous	homozygous	c.T883C	p.L295L	NA
MSTRG.10039.1	nonsynonymous	homozygous	c.A169G	p.I57V	conservative
MSTRG.10039.1	nonsynonymous	homozygous	c.C995T	p.T332I	nonconservative
MSTRG.10039.1	nonsynonymous	homozygous	c.T839C	p.I280T	nonconservative
MSTRG.10039.1	nonsynonymous	homozygous	c.T948A	p.H316Q	nonconservative
MSTRG.10039.1	synonymous	homozygous	c.A744G	p.Q248Q	NA
MSTRG.10039.1	synonymous	homozygous	c.A807G	p.L269L	NA
MSTRG.10039.1	synonymous	homozygous	c.A840C	p.I280I	NA
MSTRG.10039.1	synonymous	homozygous	c.C1011T	p.S337S	NA
MSTRG.10039.1	synonymous	heterozygous	c.C330G	p.P110P	NA
MSTRG.10039.1	synonymous	homozygous	c.C882T	p.G294G	NA
MSTRG.10039.1	synonymous	homozygous	c.C96T	p.A32A	NA
MSTRG.10039.1	synonymous	homozygous	c.G108A	p.Q36Q	NA
MSTRG.10039.1	synonymous	heterozygous	c.T514C	p.L172L	NA
MSTRG.10039.1	synonymous	homozygous	c.T627C	p.S209S	NA
MSTRG.10039.1	synonymous	homozygous	c.T750C	p.D250D	NA
MSTRG.1004.2	nonsynonymous	homozygous	c.A1534G	p.N512D	nonconservative
MSTRG.1004.2	nonsynonymous	homozygous	c.G1211A	p.G404D	nonconservative
MSTRG.1004.2	synonymous	homozygous	c.A1134G	p.K378K	NA
MSTRG.1004.2	synonymous	homozygous	c.A591T	p.G197G	NA
MSTRG.1004.2	synonymous	homozygous	c.A99C	p.V33V	NA
MSTRG.1004.2	synonymous	homozygous	c.C1099T	p.L367L	NA
MSTRG.1004.2	synonymous	homozygous	c.C1155T	p.G385G	NA
MSTRG.1004.2	synonymous	homozygous	c.C1248T	p.F416F	NA
MSTRG.1004.2	synonymous	homozygous	c.C639T	p.F213F	NA
MSTRG.1004.2	synonymous	homozygous	c.C816T	p.N272N	NA
MSTRG.1004.2	synonymous	homozygous	c.C909T	p.N303N	NA
MSTRG.1004.2	synonymous	homozygous	c.G1263A	p.Q421Q	NA
MSTRG.1004.2	synonymous	homozygous	c.G12A	p.E4E	NA
MSTRG.1004.2	synonymous	homozygous	c.G978A	p.P326P	NA
MSTRG.1004.2	synonymous	homozygous	c.T1047C	p.F349F	NA
MSTRG.1004.2	synonymous	homozygous	c.T132C	p.I44I	NA
MSTRG.1004.2	synonymous	homozygous	c.T433C	p.L145L	NA
MSTRG.1004.2	synonymous	homozygous	c.T825C	p.D275D	NA
MSTRG.1004.2	synonymous	homozygous	c.T876A	p.A292A	NA
MSTRG.10040.1	nonsynonymous	homozygous	c.A313G	p.K105E	nonconservative
MSTRG.10040.1	nonsynonymous	homozygous	c.G127A	p.V43M	conservative
MSTRG.10040.1	nonsynonymous	homozygous	c.T306G	p.N102K	nonconservative
MSTRG.10040.1	synonymous	homozygous	c.A195G	p.K65K	NA
MSTRG.10040.1	synonymous	homozygous	c.A360T	p.P120P	NA
MSTRG.10040.1	synonymous	homozygous	c.C252T	p.C84C	NA
MSTRG.10040.1	synonymous	homozygous	c.C384T	p.G128G	NA
MSTRG.10040.1	synonymous	homozygous	c.C513T	p.R171R	NA
MSTRG.10040.1	synonymous	homozygous	c.C537T	p.V179V	NA
MSTRG.10040.1	synonymous	homozygous	c.T216C	p.T72T	NA
MSTRG.10042.1	nonsynonymous	homozygous	c.A99G	p.I33M	conservative
MSTRG.10042.1	nonsynonymous	homozygous	c.G461A	p.R154H	conservative
MSTRG.10042.1	synonymous	homozygous	c.A546G	p.A182A	NA
MSTRG.10042.1	synonymous	homozygous	c.C117T	p.F39F	NA
MSTRG.10042.1	synonymous	homozygous	c.G396A	p.L132L	NA
MSTRG.10042.1	synonymous	homozygous	c.T309C	p.S103S	NA
MSTRG.10042.1	synonymous	homozygous	c.T468C	p.S156S	NA
MSTRG.10042.1	synonymous	homozygous	c.T495C	p.Y165Y	NA
MSTRG.10043.1	nonsynonymous	homozygous	c.A158G	p.Q53R	nonconservative
MSTRG.10043.1	nonsynonymous	heterozygous	c.A166G	p.T56A	nonconservative
MSTRG.10043.1	nonsynonymous	homozygous	c.C488T	p.T163M	nonconservative
MSTRG.10043.1	nonsynonymous	homozygous	c.G496A	p.A166T	nonconservative
MSTRG.10043.1	synonymous	homozygous	c.A495C	p.T165T	NA
MSTRG.10043.1	synonymous	homozygous	c.C214T	p.L72L	NA
MSTRG.10043.1	synonymous	homozygous	c.C249T	p.H83H	NA
MSTRG.10043.1	synonymous	homozygous	c.G129T	p.L43L	NA
MSTRG.10043.1	synonymous	homozygous	c.G180A	p.G60G	NA
MSTRG.10043.1	synonymous	homozygous	c.G456C	p.P152P	NA
MSTRG.10043.1	synonymous	heterozygous	c.T141C	p.S47S	NA
MSTRG.10043.1	synonymous	homozygous	c.T237C	p.H79H	NA
MSTRG.10043.2	nonsynonymous	homozygous	c.A158G	p.Q53R	nonconservative
MSTRG.10043.2	nonsynonymous	heterozygous	c.A166G	p.T56A	nonconservative
MSTRG.10043.2	synonymous	homozygous	c.C214T	p.L72L	NA
MSTRG.10043.2	synonymous	homozygous	c.C249T	p.H83H	NA
MSTRG.10043.2	synonymous	homozygous	c.G129T	p.L43L	NA
MSTRG.10043.2	synonymous	homozygous	c.G180A	p.G60G	NA
MSTRG.10043.2	synonymous	heterozygous	c.T141C	p.S47S	NA
MSTRG.10043.2	synonymous	homozygous	c.T237C	p.H79H	NA
MSTRG.10045.1	nonsynonymous	homozygous	c.T1102G	p.L368V	conservative
MSTRG.10045.1	synonymous	homozygous	c.A1008G	p.T336T	NA
MSTRG.10045.1	synonymous	homozygous	c.A510T	p.T170T	NA
MSTRG.10045.1	synonymous	homozygous	c.A546G	p.E182E	NA
MSTRG.10045.1	synonymous	homozygous	c.A57G	p.S19S	NA
MSTRG.10045.1	synonymous	homozygous	c.A717T	p.G239G	NA
MSTRG.10045.1	synonymous	homozygous	c.G168A	p.Q56Q	NA
MSTRG.10045.1	synonymous	homozygous	c.T156C	p.S52S	NA
MSTRG.10045.1	synonymous	homozygous	c.T174C	p.Y58Y	NA
MSTRG.10045.1	synonymous	homozygous	c.T207C	p.D69D	NA
MSTRG.10045.1	synonymous	homozygous	c.T694C	p.L232L	NA
MSTRG.10045.1	synonymous	homozygous	c.T702C	p.N234N	NA
MSTRG.10046.1	nonsynonymous	homozygous	c.A1171T	p.T391S	conservative
MSTRG.10046.1	nonsynonymous	heterozygous	c.A1244G	p.H415R	conservative
MSTRG.10046.1	nonsynonymous	homozygous	c.A1289G	p.K430R	conservative
MSTRG.10046.1	nonsynonymous	homozygous	c.A225C	p.E75D	conservative
MSTRG.10046.1	nonsynonymous	homozygous	c.G1426C	p.A476P	conservative
MSTRG.10046.1	nonsynonymous	homozygous	c.G328A	p.V110M	conservative
MSTRG.10046.1	nonsynonymous	homozygous	c.G372T	p.Q124H	nonconservative
MSTRG.10046.1	nonsynonymous	homozygous	c.G419T	p.R140L	nonconservative
MSTRG.10046.1	nonsynonymous	homozygous	c.G74A	p.R25K	conservative
MSTRG.10046.1	nonsynonymous	homozygous	c.T1205C	p.V402A	conservative
MSTRG.10046.1	synonymous	homozygous	c.A339G	p.K113K	NA
MSTRG.10046.1	synonymous	homozygous	c.A810G	p.L270L	NA
MSTRG.10046.1	synonymous	homozygous	c.C1050T	p.C350C	NA
MSTRG.10046.1	synonymous	homozygous	c.C117G	p.S39S	NA
MSTRG.10046.1	synonymous	homozygous	c.C1203G	p.V401V	NA
MSTRG.10046.1	synonymous	homozygous	c.C1398A	p.R466R	NA
MSTRG.10046.1	synonymous	homozygous	c.C312T	p.R104R	NA
MSTRG.10046.1	synonymous	homozygous	c.C348G	p.T116T	NA
MSTRG.10046.1	synonymous	homozygous	c.C708T	p.H236H	NA
MSTRG.10046.1	synonymous	homozygous	c.C732T	p.D244D	NA
MSTRG.10046.1	synonymous	homozygous	c.G1137A	p.R379R	NA
MSTRG.10046.1	synonymous	homozygous	c.G177A	p.V59V	NA
MSTRG.10046.1	synonymous	homozygous	c.G699A	p.G233G	NA
MSTRG.10046.1	synonymous	homozygous	c.G705A	p.K235K	NA
MSTRG.10046.1	synonymous	homozygous	c.G915A	p.E305E	NA
MSTRG.10046.1	synonymous	homozygous	c.T526C	p.L176L	NA
MSTRG.10046.1	synonymous	homozygous	c.T585C	p.C195C	NA
MSTRG.10046.1	synonymous	homozygous	c.T588C	p.Y196Y	NA
MSTRG.10046.1	synonymous	homozygous	c.T735C	p.V245V	NA
MSTRG.10046.1	synonymous	homozygous	c.T780C	p.Y260Y	NA
MSTRG.10046.1	synonymous	homozygous	c.T897G	p.L299L	NA
MSTRG.10047.1	nonsynonymous	homozygous	c.A1095C	p.Q365H	nonconservative
MSTRG.10047.1	nonsynonymous	homozygous	c.A760G	p.N254D	nonconservative
MSTRG.10047.1	nonsynonymous	homozygous	c.A835G	p.R279G	nonconservative
MSTRG.10047.1	nonsynonymous	homozygous	c.C1167G	p.D389E	conservative
MSTRG.10047.1	nonsynonymous	homozygous	c.C380T	p.A127V	conservative
MSTRG.10047.1	nonsynonymous	homozygous	c.C889T	p.L297F	conservative
MSTRG.10047.1	nonsynonymous	homozygous	c.G149T	p.W50L	conservative
MSTRG.10047.1	nonsynonymous	homozygous	c.G150T	p.W50C	nonconservative
MSTRG.10047.1	nonsynonymous	homozygous	c.G196A	p.E66K	nonconservative
MSTRG.10047.1	nonsynonymous	homozygous	c.G251A	p.S84N	conservative
MSTRG.10047.1	nonsynonymous	homozygous	c.G620A	p.C207Y	conservative
MSTRG.10047.1	nonsynonymous	homozygous	c.G805A	p.A269T	nonconservative
MSTRG.10047.1	synonymous	homozygous	c.A1344T	p.R448R	NA
MSTRG.10047.1	synonymous	homozygous	c.A342C	p.G114G	NA
MSTRG.10047.1	synonymous	homozygous	c.A930C	p.R310R	NA
MSTRG.10047.1	synonymous	homozygous	c.C1041T	p.T347T	NA
MSTRG.10047.1	synonymous	homozygous	c.C1089G	p.G363G	NA
MSTRG.10047.1	synonymous	homozygous	c.C1257T	p.I419I	NA
MSTRG.10047.1	synonymous	homozygous	c.C762T	p.N254N	NA
MSTRG.10047.1	synonymous	homozygous	c.G1050T	p.R350R	NA
MSTRG.10047.1	synonymous	homozygous	c.G411T	p.T137T	NA
MSTRG.10047.1	synonymous	homozygous	c.G435A	p.V145V	NA
MSTRG.10047.1	synonymous	homozygous	c.G651A	p.R217R	NA
MSTRG.10047.1	synonymous	homozygous	c.G747A	p.A249A	NA
MSTRG.10047.1	synonymous	homozygous	c.T1002C	p.C334C	NA
MSTRG.10047.1	synonymous	homozygous	c.T1212C	p.A404A	NA
MSTRG.10047.1	synonymous	homozygous	c.T225C	p.C75C	NA
MSTRG.10047.1	synonymous	homozygous	c.T234C	p.N78N	NA
MSTRG.10047.1	synonymous	homozygous	c.T405A	p.P135P	NA
MSTRG.10047.2	nonsynonymous	homozygous	c.A1101C	p.Q367H	nonconservative
MSTRG.10047.2	nonsynonymous	homozygous	c.A766G	p.N256D	nonconservative
MSTRG.10047.2	nonsynonymous	homozygous	c.A841G	p.R281G	nonconservative
MSTRG.10047.2	nonsynonymous	homozygous	c.C1173G	p.D391E	conservative
MSTRG.10047.2	nonsynonymous	homozygous	c.C380T	p.A127V	conservative
MSTRG.10047.2	nonsynonymous	homozygous	c.C895T	p.L299F	conservative
MSTRG.10047.2	nonsynonymous	homozygous	c.G149T	p.W50L	conservative
MSTRG.10047.2	nonsynonymous	homozygous	c.G150T	p.W50C	nonconservative
MSTRG.10047.2	nonsynonymous	homozygous	c.G196A	p.E66K	nonconservative
MSTRG.10047.2	nonsynonymous	homozygous	c.G251A	p.S84N	conservative
MSTRG.10047.2	nonsynonymous	homozygous	c.G626A	p.C209Y	conservative
MSTRG.10047.2	nonsynonymous	homozygous	c.G811A	p.A271T	nonconservative
MSTRG.10047.2	synonymous	homozygous	c.A1350T	p.R450R	NA
MSTRG.10047.2	synonymous	homozygous	c.A342C	p.G114G	NA
MSTRG.10047.2	synonymous	homozygous	c.A936C	p.R312R	NA
MSTRG.10047.2	synonymous	homozygous	c.C1047T	p.T349T	NA
MSTRG.10047.2	synonymous	homozygous	c.C1095G	p.G365G	NA
MSTRG.10047.2	synonymous	homozygous	c.C1263T	p.I421I	NA
MSTRG.10047.2	synonymous	homozygous	c.C768T	p.N256N	NA
MSTRG.10047.2	synonymous	homozygous	c.G1056T	p.R352R	NA
MSTRG.10047.2	synonymous	homozygous	c.G411T	p.T137T	NA
MSTRG.10047.2	synonymous	homozygous	c.G435A	p.V145V	NA
MSTRG.10047.2	synonymous	homozygous	c.G657A	p.R219R	NA
MSTRG.10047.2	synonymous	homozygous	c.G753A	p.A251A	NA
MSTRG.10047.2	synonymous	homozygous	c.T1008C	p.C336C	NA
MSTRG.10047.2	synonymous	homozygous	c.T1218C	p.A406A	NA
MSTRG.10047.2	synonymous	homozygous	c.T225C	p.C75C	NA
MSTRG.10047.2	synonymous	homozygous	c.T234C	p.N78N	NA
MSTRG.10047.2	synonymous	homozygous	c.T405A	p.P135P	NA
MSTRG.10048.1	nonsynonymous	homozygous	c.A1007G	p.K336R	conservative
MSTRG.10048.1	nonsynonymous	homozygous	c.A1178G	p.Q393R	nonconservative
MSTRG.10048.1	nonsynonymous	homozygous	c.A1603G	p.N535D	nonconservative
MSTRG.10048.1	nonsynonymous	homozygous	c.A1807G	p.N603D	nonconservative
MSTRG.10048.1	nonsynonymous	homozygous	c.A598G	p.S200G	nonconservative
MSTRG.10048.1	nonsynonymous	homozygous	c.A937G	p.I313V	conservative
MSTRG.10048.1	nonsynonymous	homozygous	c.C1693G	p.Q565E	nonconservative
MSTRG.10048.1	nonsynonymous	homozygous	c.G1565A	p.R522K	conservative
MSTRG.10048.1	nonsynonymous	heterozygous	c.G1780C	p.A594P	conservative
MSTRG.10048.1	nonsynonymous	homozygous	c.G391C	p.A131P	conservative
MSTRG.10048.1	nonsynonymous	homozygous	c.G67A	p.E23K	nonconservative
MSTRG.10048.1	nonsynonymous	homozygous	c.G985A	p.D329N	nonconservative
MSTRG.10048.1	nonsynonymous	homozygous	c.T1139C	p.V380A	conservative
MSTRG.10048.1	nonsynonymous	homozygous	c.T1495G	p.S499A	nonconservative
MSTRG.10048.1	nonsynonymous	homozygous	c.T20C	p.V7A	conservative
MSTRG.10048.1	nonsynonymous	heterozygous	c.T740C	p.L247S	nonconservative
MSTRG.10048.1	synonymous	homozygous	c.A165G	p.V55V	NA
MSTRG.10048.1	synonymous	homozygous	c.A1815G	p.E605E	NA
MSTRG.10048.1	synonymous	homozygous	c.A330G	p.L110L	NA
MSTRG.10048.1	synonymous	homozygous	c.A561G	p.L187L	NA
MSTRG.10048.1	synonymous	homozygous	c.C1531T	p.L511L	NA
MSTRG.10048.1	synonymous	homozygous	c.C276T	p.D92D	NA
MSTRG.10048.1	synonymous	homozygous	c.C459T	p.H153H	NA
MSTRG.10048.1	synonymous	homozygous	c.C933T	p.P311P	NA
MSTRG.10048.1	synonymous	homozygous	c.G1011A	p.A337A	NA
MSTRG.10048.1	synonymous	homozygous	c.G1215A	p.T405T	NA
MSTRG.10048.1	synonymous	homozygous	c.G1455A	p.L485L	NA
MSTRG.10048.1	synonymous	homozygous	c.G1644A	p.P548P	NA
MSTRG.10048.1	synonymous	heterozygous	c.G1710A	p.R570R	NA
MSTRG.10048.1	synonymous	homozygous	c.G462A	p.A154A	NA
MSTRG.10048.1	synonymous	homozygous	c.G783A	p.Q261Q	NA
MSTRG.10048.1	synonymous	homozygous	c.T373C	p.L125L	NA
MSTRG.10048.1	synonymous	homozygous	c.T423C	p.H141H	NA
MSTRG.10048.1	synonymous	homozygous	c.T496C	p.L166L	NA
MSTRG.10048.1	synonymous	homozygous	c.T624C	p.S208S	NA
MSTRG.10049.1	nonsynonymous	homozygous	c.A1465G	p.R489G	nonconservative
MSTRG.10049.1	nonsynonymous	homozygous	c.A1628G	p.H543R	conservative
MSTRG.10049.1	nonsynonymous	homozygous	c.A1717G	p.K573E	nonconservative
MSTRG.10049.1	nonsynonymous	homozygous	c.A568G	p.I190V	conservative
MSTRG.10049.1	nonsynonymous	homozygous	c.A68G	p.D23G	nonconservative
MSTRG.10049.1	nonsynonymous	homozygous	c.C1727T	p.T576I	nonconservative
MSTRG.10049.1	nonsynonymous	homozygous	c.G1222A	p.A408T	nonconservative
MSTRG.10049.1	nonsynonymous	homozygous	c.G1684A	p.D562N	nonconservative
MSTRG.10049.1	nonsynonymous	homozygous	c.T1733C	p.F578S	nonconservative
MSTRG.10049.1	nonsynonymous	homozygous	c.T687G	p.F229L	conservative
MSTRG.10049.1	stopgain	homozygous	c.C1756T	p.R586X	NA
MSTRG.10049.1	synonymous	homozygous	c.A1176G	p.P392P	NA
MSTRG.10049.1	synonymous	homozygous	c.A1290G	p.T430T	NA
MSTRG.10049.1	synonymous	homozygous	c.A1380G	p.K460K	NA
MSTRG.10049.1	synonymous	homozygous	c.A294G	p.K98K	NA
MSTRG.10049.1	synonymous	homozygous	c.A750T	p.R250R	NA
MSTRG.10049.1	synonymous	homozygous	c.A888G	p.L296L	NA
MSTRG.10049.1	synonymous	homozygous	c.C1644G	p.T548T	NA
MSTRG.10049.1	synonymous	homozygous	c.C936T	p.S312S	NA
MSTRG.10049.1	synonymous	homozygous	c.G1497A	p.R499R	NA
MSTRG.10049.1	synonymous	homozygous	c.G477C	p.T159T	NA
MSTRG.10049.1	synonymous	homozygous	c.G561A	p.S187S	NA
MSTRG.10049.1	synonymous	homozygous	c.G762A	p.A254A	NA
MSTRG.10049.1	synonymous	homozygous	c.T1156C	p.L386L	NA
MSTRG.10049.1	synonymous	homozygous	c.T1413C	p.N471N	NA
MSTRG.10049.1	synonymous	homozygous	c.T360C	p.C120C	NA
MSTRG.10049.1	synonymous	homozygous	c.T693C	p.I231I	NA
MSTRG.10049.1	synonymous	homozygous	c.T696C	p.V232V	NA
MSTRG.10049.1	synonymous	homozygous	c.T699A	p.S233S	NA
MSTRG.1005.1	nonsynonymous	homozygous	c.A1240G	p.T414A	nonconservative
MSTRG.1005.1	nonsynonymous	homozygous	c.A1287G	p.I429M	conservative
MSTRG.1005.1	nonsynonymous	homozygous	c.A190G	p.I64V	conservative
MSTRG.1005.1	nonsynonymous	homozygous	c.A310G	p.I104V	conservative
MSTRG.1005.1	nonsynonymous	homozygous	c.A431G	p.Y144C	conservative
MSTRG.1005.1	nonsynonymous	homozygous	c.A56G	p.E19G	nonconservative
MSTRG.1005.1	nonsynonymous	homozygous	c.C752T	p.A251V	conservative
MSTRG.1005.1	nonsynonymous	homozygous	c.C788T	p.A263V	conservative
MSTRG.1005.1	nonsynonymous	homozygous	c.C851T	p.S284F	nonconservative
MSTRG.1005.1	nonsynonymous	homozygous	c.G1238A	p.G413E	nonconservative
MSTRG.1005.1	nonsynonymous	homozygous	c.G349A	p.A117T	nonconservative
MSTRG.1005.1	nonsynonymous	homozygous	c.G656A	p.R219K	conservative
MSTRG.1005.1	nonsynonymous	homozygous	c.G687T	p.M229I	conservative
MSTRG.1005.1	nonsynonymous	homozygous	c.G837C	p.E279D	conservative
MSTRG.1005.1	nonsynonymous	homozygous	c.G911C	p.S304T	conservative
MSTRG.1005.1	nonsynonymous	homozygous	c.G97A	p.V33I	conservative
MSTRG.1005.1	nonsynonymous	homozygous	c.T470C	p.V157A	conservative
MSTRG.1005.1	synonymous	homozygous	c.A417G	p.P139P	NA
MSTRG.1005.1	synonymous	homozygous	c.A873G	p.Q291Q	NA
MSTRG.1005.1	synonymous	homozygous	c.A897G	p.E299E	NA
MSTRG.1005.1	synonymous	homozygous	c.A927T	p.I309I	NA
MSTRG.1005.1	synonymous	homozygous	c.C162T	p.Y54Y	NA
MSTRG.1005.1	synonymous	homozygous	c.C90G	p.S30S	NA
MSTRG.1005.1	synonymous	homozygous	c.G207A	p.E69E	NA
MSTRG.1005.1	synonymous	homozygous	c.G387A	p.T129T	NA
MSTRG.1005.1	synonymous	homozygous	c.G498T	p.A166A	NA
MSTRG.1005.1	synonymous	homozygous	c.T1200A	p.S400S	NA
MSTRG.1005.1	synonymous	homozygous	c.T216A	p.V72V	NA
MSTRG.1005.1	synonymous	homozygous	c.T297A	p.A99A	NA
MSTRG.10050.1	nonsynonymous	homozygous	c.A523G	p.M175V	conservative
MSTRG.10050.1	nonsynonymous	homozygous	c.A661G	p.I221V	conservative
MSTRG.10050.1	nonsynonymous	homozygous	c.A824G	p.N275S	conservative
MSTRG.10050.1	nonsynonymous	homozygous	c.C514A	p.Q172K	nonconservative
MSTRG.10050.1	nonsynonymous	homozygous	c.G79A	p.V27I	conservative
MSTRG.10050.1	nonsynonymous	homozygous	c.G908A	p.R303H	conservative
MSTRG.10050.1	nonsynonymous	homozygous	c.T200G	p.L67R	nonconservative
MSTRG.10050.1	nonsynonymous	homozygous	c.T241G	p.S81A	nonconservative
MSTRG.10050.1	nonsynonymous	homozygous	c.T746C	p.V249A	conservative
MSTRG.10050.1	nonsynonymous	homozygous	c.T980C	p.M327T	nonconservative
MSTRG.10050.1	synonymous	homozygous	c.A234C	p.G78G	NA
MSTRG.10050.1	synonymous	homozygous	c.A246G	p.Q82Q	NA
MSTRG.10050.1	synonymous	homozygous	c.A534G	p.V178V	NA
MSTRG.10050.1	synonymous	homozygous	c.A612G	p.R204R	NA
MSTRG.10050.1	synonymous	homozygous	c.A660G	p.L220L	NA
MSTRG.10050.1	synonymous	homozygous	c.A840G	p.G280G	NA
MSTRG.10050.1	synonymous	homozygous	c.C249A	p.L83L	NA
MSTRG.10050.1	synonymous	homozygous	c.C438G	p.P146P	NA
MSTRG.10050.1	synonymous	homozygous	c.C651A	p.L217L	NA
MSTRG.10050.1	synonymous	homozygous	c.C678T	p.Y226Y	NA
MSTRG.10050.1	synonymous	homozygous	c.G342A	p.Q114Q	NA
MSTRG.10050.1	synonymous	homozygous	c.G390A	p.K130K	NA
MSTRG.10050.1	synonymous	homozygous	c.G528A	p.S176S	NA
MSTRG.10050.1	synonymous	homozygous	c.G723A	p.V241V	NA
MSTRG.10050.1	synonymous	homozygous	c.G906T	p.P302P	NA
MSTRG.10050.1	synonymous	homozygous	c.T786C	p.N262N	NA
MSTRG.10050.1	synonymous	homozygous	c.T804C	p.H268H	NA
MSTRG.10050.1	synonymous	homozygous	c.T903C	p.F301F	NA
MSTRG.10050.2	nonsynonymous	homozygous	c.A490G	p.M164V	conservative
MSTRG.10050.2	nonsynonymous	homozygous	c.A628G	p.I210V	conservative
MSTRG.10050.2	nonsynonymous	homozygous	c.A791G	p.N264S	conservative
MSTRG.10050.2	nonsynonymous	homozygous	c.C481A	p.Q161K	nonconservative
MSTRG.10050.2	nonsynonymous	homozygous	c.G79A	p.V27I	conservative
MSTRG.10050.2	nonsynonymous	homozygous	c.G875A	p.R292H	conservative
MSTRG.10050.2	nonsynonymous	homozygous	c.T200G	p.L67R	nonconservative
MSTRG.10050.2	nonsynonymous	homozygous	c.T713C	p.V238A	conservative
MSTRG.10050.2	nonsynonymous	homozygous	c.T947C	p.M316T	nonconservative
MSTRG.10050.2	synonymous	homozygous	c.A234C	p.G78G	NA
MSTRG.10050.2	synonymous	homozygous	c.A501G	p.V167V	NA
MSTRG.10050.2	synonymous	homozygous	c.A579G	p.R193R	NA
MSTRG.10050.2	synonymous	homozygous	c.A627G	p.L209L	NA
MSTRG.10050.2	synonymous	homozygous	c.A807G	p.G269G	NA
MSTRG.10050.2	synonymous	homozygous	c.C405G	p.P135P	NA
MSTRG.10050.2	synonymous	homozygous	c.C618A	p.L206L	NA
MSTRG.10050.2	synonymous	homozygous	c.C645T	p.Y215Y	NA
MSTRG.10050.2	synonymous	homozygous	c.G309A	p.Q103Q	NA
MSTRG.10050.2	synonymous	homozygous	c.G357A	p.K119K	NA
MSTRG.10050.2	synonymous	homozygous	c.G495A	p.S165S	NA
MSTRG.10050.2	synonymous	homozygous	c.G690A	p.V230V	NA
MSTRG.10050.2	synonymous	homozygous	c.G873T	p.P291P	NA
MSTRG.10050.2	synonymous	homozygous	c.T753C	p.N251N	NA
MSTRG.10050.2	synonymous	homozygous	c.T771C	p.H257H	NA
MSTRG.10050.2	synonymous	homozygous	c.T870C	p.F290F	NA
MSTRG.10057.1	nonsynonymous	homozygous	c.A278C	p.E93A	nonconservative
MSTRG.10057.1	nonsynonymous	homozygous	c.A376G	p.T126A	nonconservative
MSTRG.10057.1	nonsynonymous	homozygous	c.C290G	p.S97C	conservative
MSTRG.10057.1	nonsynonymous	homozygous	c.T221A	p.F74Y	nonconservative
MSTRG.10057.1	nonsynonymous	homozygous	c.T71C	p.F24S	nonconservative
MSTRG.10057.1	synonymous	homozygous	c.A177G	p.L59L	NA
MSTRG.10057.1	synonymous	homozygous	c.A516G	p.G172G	NA
MSTRG.10057.1	synonymous	homozygous	c.C175T	p.L59L	NA
MSTRG.10057.1	synonymous	homozygous	c.C96T	p.I32I	NA
MSTRG.10057.1	synonymous	homozygous	c.G51A	p.T17T	NA
MSTRG.10057.1	synonymous	homozygous	c.T48C	p.L16L	NA
MSTRG.10057.1	synonymous	homozygous	c.T522C	p.P174P	NA
MSTRG.10057.1	synonymous	homozygous	c.T588C	p.T196T	NA
MSTRG.10058.1	nonsynonymous	homozygous	c.A205G	p.I69V	conservative
MSTRG.10058.1	nonsynonymous	homozygous	c.C1115T	p.A372V	conservative
MSTRG.10058.1	nonsynonymous	homozygous	c.G1171A	p.D391N	nonconservative
MSTRG.10058.1	nonsynonymous	homozygous	c.G445A	p.V149I	conservative
MSTRG.10058.1	nonsynonymous	homozygous	c.G610A	p.D204N	nonconservative
MSTRG.10058.1	nonsynonymous	homozygous	c.T41G	p.F14C	nonconservative
MSTRG.10058.1	nonsynonymous	homozygous	c.T446C	p.V149A	conservative
MSTRG.10058.1	nonsynonymous	homozygous	c.T527C	p.V176A	conservative
MSTRG.10058.1	synonymous	homozygous	c.A402G	p.Q134Q	NA
MSTRG.10058.1	synonymous	homozygous	c.A765G	p.E255E	NA
MSTRG.10058.1	synonymous	homozygous	c.A888G	p.L296L	NA
MSTRG.10058.1	synonymous	homozygous	c.C210T	p.N70N	NA
MSTRG.10058.1	synonymous	homozygous	c.C381T	p.Y127Y	NA
MSTRG.10058.1	synonymous	homozygous	c.G462A	p.V154V	NA
MSTRG.10058.1	synonymous	homozygous	c.G816A	p.G272G	NA
MSTRG.10058.1	synonymous	homozygous	c.G870A	p.T290T	NA
MSTRG.10058.1	synonymous	homozygous	c.T1026C	p.N342N	NA
MSTRG.10058.1	synonymous	homozygous	c.T22C	p.L8L	NA
MSTRG.10058.1	synonymous	homozygous	c.T237C	p.F79F	NA
MSTRG.10058.1	synonymous	homozygous	c.T66C	p.F22F	NA
MSTRG.10058.1	synonymous	homozygous	c.T882C	p.I294I	NA
MSTRG.10058.1	synonymous	homozygous	c.T915C	p.L305L	NA
MSTRG.10058.1	synonymous	homozygous	c.T975C	p.S325S	NA
MSTRG.1006.1	nonsynonymous	homozygous	c.A2686G	p.I896V	conservative
MSTRG.1006.1	nonsynonymous	homozygous	c.A4016G	p.K1339R	conservative
MSTRG.1006.1	nonsynonymous	homozygous	c.A4081G	p.R1361G	nonconservative
MSTRG.1006.1	nonsynonymous	homozygous	c.A4486G	p.N1496D	nonconservative
MSTRG.1006.1	nonsynonymous	homozygous	c.A4518T	p.E1506D	conservative
MSTRG.1006.1	nonsynonymous	homozygous	c.A487C	p.K163Q	nonconservative
MSTRG.1006.1	nonsynonymous	homozygous	c.C1745T	p.T582I	nonconservative
MSTRG.1006.1	nonsynonymous	homozygous	c.C1889T	p.A630V	conservative
MSTRG.1006.1	nonsynonymous	homozygous	c.C2329G	p.L777V	conservative
MSTRG.1006.1	nonsynonymous	homozygous	c.G1220A	p.R407H	conservative
MSTRG.1006.1	nonsynonymous	homozygous	c.G1691A	p.R564K	conservative
MSTRG.1006.1	nonsynonymous	homozygous	c.G2217A	p.M739I	conservative
MSTRG.1006.1	nonsynonymous	homozygous	c.G2785A	p.A929T	nonconservative
MSTRG.1006.1	nonsynonymous	homozygous	c.G3419A	p.R1140K	conservative
MSTRG.1006.1	nonsynonymous	homozygous	c.G3677A	p.R1226K	conservative
MSTRG.1006.1	nonsynonymous	homozygous	c.G5221T	p.A1741S	nonconservative
MSTRG.1006.1	nonsynonymous	homozygous	c.G914A	p.R305Q	nonconservative
MSTRG.1006.1	nonsynonymous	homozygous	c.T1585C	p.F529L	conservative
MSTRG.1006.1	nonsynonymous	homozygous	c.T3702G	p.F1234L	conservative
MSTRG.1006.1	synonymous	homozygous	c.A1146G	p.Q382Q	NA
MSTRG.1006.1	synonymous	homozygous	c.A126G	p.R42R	NA
MSTRG.1006.1	synonymous	homozygous	c.A1407G	p.K469K	NA
MSTRG.1006.1	synonymous	homozygous	c.A1515G	p.V505V	NA
MSTRG.1006.1	synonymous	homozygous	c.A2223G	p.K741K	NA
MSTRG.1006.1	synonymous	homozygous	c.A2310T	p.V770V	NA
MSTRG.1006.1	synonymous	homozygous	c.A2436G	p.Q812Q	NA
MSTRG.1006.1	synonymous	homozygous	c.A2796G	p.K932K	NA
MSTRG.1006.1	synonymous	homozygous	c.A4758G	p.E1586E	NA
MSTRG.1006.1	synonymous	homozygous	c.A4818C	p.A1606A	NA
MSTRG.1006.1	synonymous	homozygous	c.A579G	p.S193S	NA
MSTRG.1006.1	synonymous	homozygous	c.A60G	p.L20L	NA
MSTRG.1006.1	synonymous	homozygous	c.A739C	p.R247R	NA
MSTRG.1006.1	synonymous	homozygous	c.A978G	p.L326L	NA
MSTRG.1006.1	synonymous	homozygous	c.C1014T	p.F338F	NA
MSTRG.1006.1	synonymous	homozygous	c.C1053T	p.P351P	NA
MSTRG.1006.1	synonymous	homozygous	c.C2080T	p.L694L	NA
MSTRG.1006.1	synonymous	homozygous	c.C2679T	p.D893D	NA
MSTRG.1006.1	synonymous	homozygous	c.C3120T	p.A1040A	NA
MSTRG.1006.1	synonymous	homozygous	c.C3756T	p.L1252L	NA
MSTRG.1006.1	synonymous	heterozygous	c.C4506T	p.S1502S	NA
MSTRG.1006.1	synonymous	homozygous	c.C471T	p.D157D	NA
MSTRG.1006.1	synonymous	homozygous	c.C486T	p.S162S	NA
MSTRG.1006.1	synonymous	homozygous	c.C4876T	p.L1626L	NA
MSTRG.1006.1	synonymous	homozygous	c.C4923T	p.I1641I	NA
MSTRG.1006.1	synonymous	homozygous	c.C5037T	p.G1679G	NA
MSTRG.1006.1	synonymous	homozygous	c.C558T	p.S186S	NA
MSTRG.1006.1	synonymous	homozygous	c.C99A	p.L33L	NA
MSTRG.1006.1	synonymous	homozygous	c.G1275A	p.G425G	NA
MSTRG.1006.1	synonymous	homozygous	c.G1848C	p.R616R	NA
MSTRG.1006.1	synonymous	homozygous	c.G1953A	p.A651A	NA
MSTRG.1006.1	synonymous	homozygous	c.G2124A	p.R708R	NA
MSTRG.1006.1	synonymous	homozygous	c.G2334A	p.S778S	NA
MSTRG.1006.1	synonymous	homozygous	c.G2574A	p.V858V	NA
MSTRG.1006.1	synonymous	homozygous	c.G3069A	p.Q1023Q	NA
MSTRG.1006.1	synonymous	homozygous	c.G3339A	p.K1113K	NA
MSTRG.1006.1	synonymous	homozygous	c.G4140A	p.E1380E	NA
MSTRG.1006.1	synonymous	homozygous	c.G4290A	p.L1430L	NA
MSTRG.1006.1	synonymous	homozygous	c.G4314A	p.S1438S	NA
MSTRG.1006.1	synonymous	homozygous	c.G4326A	p.E1442E	NA
MSTRG.1006.1	synonymous	homozygous	c.G4797A	p.T1599T	NA
MSTRG.1006.1	synonymous	homozygous	c.G5061T	p.P1687P	NA
MSTRG.1006.1	synonymous	homozygous	c.G5064T	p.L1688L	NA
MSTRG.1006.1	synonymous	homozygous	c.G5169A	p.S1723S	NA
MSTRG.1006.1	synonymous	homozygous	c.G618A	p.R206R	NA
MSTRG.1006.1	synonymous	homozygous	c.G882A	p.E294E	NA
MSTRG.1006.1	synonymous	homozygous	c.G897A	p.V299V	NA
MSTRG.1006.1	synonymous	homozygous	c.G996A	p.G332G	NA
MSTRG.1006.1	synonymous	homozygous	c.T1071C	p.C357C	NA
MSTRG.1006.1	synonymous	homozygous	c.T1092A	p.P364P	NA
MSTRG.1006.1	synonymous	homozygous	c.T1101C	p.F367F	NA
MSTRG.1006.1	synonymous	homozygous	c.T1212C	p.H404H	NA
MSTRG.1006.1	synonymous	homozygous	c.T1329G	p.T443T	NA
MSTRG.1006.1	synonymous	heterozygous	c.T147C	p.H49H	NA
MSTRG.1006.1	synonymous	homozygous	c.T2094C	p.H698H	NA
MSTRG.1006.1	synonymous	homozygous	c.T2113C	p.L705L	NA
MSTRG.1006.1	synonymous	homozygous	c.T225C	p.Y75Y	NA
MSTRG.1006.1	synonymous	homozygous	c.T2850C	p.F950F	NA
MSTRG.1006.1	synonymous	homozygous	c.T3444C	p.P1148P	NA
MSTRG.1006.1	synonymous	homozygous	c.T3492C	p.H1164H	NA
MSTRG.1006.1	synonymous	homozygous	c.T3585C	p.C1195C	NA
MSTRG.1006.1	synonymous	homozygous	c.T3991C	p.L1331L	NA
MSTRG.1006.1	synonymous	heterozygous	c.T4560C	p.R1520R	NA
MSTRG.1006.1	synonymous	homozygous	c.T4809C	p.N1603N	NA
MSTRG.1006.1	synonymous	homozygous	c.T675A	p.G225G	NA
MSTRG.1006.1	synonymous	homozygous	c.T771C	p.S257S	NA
MSTRG.10060.1	synonymous	homozygous	c.A252G	p.P84P	NA
MSTRG.10060.1	synonymous	homozygous	c.A348G	p.E116E	NA
MSTRG.10060.1	synonymous	homozygous	c.C132T	p.C44C	NA
MSTRG.10060.1	synonymous	homozygous	c.G72A	p.S24S	NA
MSTRG.10061.1	nonsynonymous	homozygous	c.A1180T	p.M394L	conservative
MSTRG.10061.1	nonsynonymous	homozygous	c.A2248T	p.T750S	conservative
MSTRG.10061.1	nonsynonymous	homozygous	c.A377G	p.Q126R	nonconservative
MSTRG.10061.1	nonsynonymous	homozygous	c.A455T	p.D152V	nonconservative
MSTRG.10061.1	nonsynonymous	heterozygous	c.A581C	p.K194T	nonconservative
MSTRG.10061.1	nonsynonymous	homozygous	c.C2044T	p.R682C	nonconservative
MSTRG.10061.1	nonsynonymous	homozygous	c.C569G	p.P190R	nonconservative
MSTRG.10061.1	nonsynonymous	homozygous	c.G1405A	p.V469I	conservative
MSTRG.10061.1	nonsynonymous	homozygous	c.G2207A	p.S736N	conservative
MSTRG.10061.1	nonsynonymous	homozygous	c.G673A	p.V225M	conservative
MSTRG.10061.1	nonsynonymous	homozygous	c.T1144A	p.S382T	conservative
MSTRG.10061.1	nonsynonymous	homozygous	c.T2270C	p.I757T	nonconservative
MSTRG.10061.1	nonsynonymous	homozygous	c.T307G	p.S103A	nonconservative
MSTRG.10061.1	synonymous	homozygous	c.A1137G	p.E379E	NA
MSTRG.10061.1	synonymous	homozygous	c.A1896G	p.K632K	NA
MSTRG.10061.1	synonymous	homozygous	c.A1941G	p.V647V	NA
MSTRG.10061.1	synonymous	homozygous	c.A1974G	p.R658R	NA
MSTRG.10061.1	synonymous	homozygous	c.A450G	p.V150V	NA
MSTRG.10061.1	synonymous	homozygous	c.A813T	p.A271A	NA
MSTRG.10061.1	synonymous	homozygous	c.C1377T	p.S459S	NA
MSTRG.10061.1	synonymous	homozygous	c.C2082G	p.L694L	NA
MSTRG.10061.1	synonymous	homozygous	c.C2083A	p.R695R	NA
MSTRG.10061.1	synonymous	homozygous	c.C651T	p.I217I	NA
MSTRG.10061.1	synonymous	homozygous	c.C669T	p.D223D	NA
MSTRG.10061.1	synonymous	homozygous	c.C849T	p.S283S	NA
MSTRG.10061.1	synonymous	homozygous	c.G1512A	p.T504T	NA
MSTRG.10061.1	synonymous	homozygous	c.G1713A	p.E571E	NA
MSTRG.10061.1	synonymous	homozygous	c.G1755A	p.L585L	NA
MSTRG.10061.1	synonymous	homozygous	c.G1773A	p.R591R	NA
MSTRG.10061.1	synonymous	homozygous	c.G2124T	p.S708S	NA
MSTRG.10061.1	synonymous	homozygous	c.G567A	p.G189G	NA
MSTRG.10061.1	synonymous	homozygous	c.G846A	p.P282P	NA
MSTRG.10061.1	synonymous	homozygous	c.T1065G	p.S355S	NA
MSTRG.10061.1	synonymous	homozygous	c.T1344C	p.D448D	NA
MSTRG.10061.1	synonymous	homozygous	c.T1620C	p.V540V	NA
MSTRG.10061.1	synonymous	homozygous	c.T1806A	p.L602L	NA
MSTRG.10061.1	synonymous	homozygous	c.T2244C	p.I748I	NA
MSTRG.10061.1	synonymous	homozygous	c.T393C	p.T131T	NA
MSTRG.10061.1	synonymous	homozygous	c.T750C	p.Y250Y	NA
MSTRG.10061.1	synonymous	homozygous	c.T999A	p.R333R	NA
MSTRG.10061.2	nonsynonymous	homozygous	c.A1180T	p.M394L	conservative
MSTRG.10061.2	nonsynonymous	homozygous	c.A377G	p.Q126R	nonconservative
MSTRG.10061.2	nonsynonymous	homozygous	c.A455T	p.D152V	nonconservative
MSTRG.10061.2	nonsynonymous	heterozygous	c.A581C	p.K194T	nonconservative
MSTRG.10061.2	nonsynonymous	homozygous	c.C569G	p.P190R	nonconservative
MSTRG.10061.2	nonsynonymous	homozygous	c.G1405A	p.V469I	conservative
MSTRG.10061.2	nonsynonymous	homozygous	c.G2026T	p.A676S	nonconservative
MSTRG.10061.2	nonsynonymous	homozygous	c.G673A	p.V225M	conservative
MSTRG.10061.2	nonsynonymous	homozygous	c.T1144A	p.S382T	conservative
MSTRG.10061.2	nonsynonymous	homozygous	c.T307G	p.S103A	nonconservative
MSTRG.10061.2	synonymous	homozygous	c.A1137G	p.E379E	NA
MSTRG.10061.2	synonymous	homozygous	c.A1896G	p.K632K	NA
MSTRG.10061.2	synonymous	homozygous	c.A1941G	p.V647V	NA
MSTRG.10061.2	synonymous	homozygous	c.A450G	p.V150V	NA
MSTRG.10061.2	synonymous	homozygous	c.A813T	p.A271A	NA
MSTRG.10061.2	synonymous	homozygous	c.C1377T	p.S459S	NA
MSTRG.10061.2	synonymous	homozygous	c.C651T	p.I217I	NA
MSTRG.10061.2	synonymous	homozygous	c.C669T	p.D223D	NA
MSTRG.10061.2	synonymous	homozygous	c.C849T	p.S283S	NA
MSTRG.10061.2	synonymous	homozygous	c.G1512A	p.T504T	NA
MSTRG.10061.2	synonymous	homozygous	c.G1713A	p.E571E	NA
MSTRG.10061.2	synonymous	homozygous	c.G1755A	p.L585L	NA
MSTRG.10061.2	synonymous	homozygous	c.G1773A	p.R591R	NA
MSTRG.10061.2	synonymous	homozygous	c.G567A	p.G189G	NA
MSTRG.10061.2	synonymous	homozygous	c.G846A	p.P282P	NA
MSTRG.10061.2	synonymous	homozygous	c.T1065G	p.S355S	NA
MSTRG.10061.2	synonymous	homozygous	c.T1344C	p.D448D	NA
MSTRG.10061.2	synonymous	homozygous	c.T1620C	p.V540V	NA
MSTRG.10061.2	synonymous	homozygous	c.T1806A	p.L602L	NA
MSTRG.10061.2	synonymous	homozygous	c.T393C	p.T131T	NA
MSTRG.10061.2	synonymous	homozygous	c.T750C	p.Y250Y	NA
MSTRG.10061.2	synonymous	homozygous	c.T999A	p.R333R	NA
MSTRG.10062.1	nonsynonymous	homozygous	c.C155T	p.A52V	conservative
MSTRG.10062.1	synonymous	homozygous	c.G219A	p.V73V	NA
MSTRG.10064.1	nonsynonymous	homozygous	c.A1564G	p.I522V	conservative
MSTRG.10064.1	nonsynonymous	homozygous	c.A1875C	p.E625D	conservative
MSTRG.10064.1	nonsynonymous	homozygous	c.A2126G	p.N709S	conservative
MSTRG.10064.1	synonymous	homozygous	c.A1083G	p.R361R	NA
MSTRG.10064.1	synonymous	homozygous	c.C1662T	p.V554V	NA
MSTRG.10064.1	synonymous	homozygous	c.C1710A	p.A570A	NA
MSTRG.10064.1	synonymous	homozygous	c.C1900T	p.L634L	NA
MSTRG.10064.1	synonymous	homozygous	c.C2073T	p.H691H	NA
MSTRG.10064.1	synonymous	homozygous	c.C768T	p.N256N	NA
MSTRG.10064.1	synonymous	homozygous	c.G1383A	p.P461P	NA
MSTRG.10064.1	synonymous	homozygous	c.G1443A	p.Q481Q	NA
MSTRG.10064.1	synonymous	homozygous	c.G1593A	p.S531S	NA
MSTRG.10064.1	synonymous	homozygous	c.G1671A	p.L557L	NA
MSTRG.10064.1	synonymous	homozygous	c.G1824C	p.V608V	NA
MSTRG.10064.1	synonymous	homozygous	c.G2130A	p.T710T	NA
MSTRG.10064.1	synonymous	homozygous	c.G570A	p.L190L	NA
MSTRG.10064.1	synonymous	homozygous	c.T1155C	p.R385R	NA
MSTRG.10064.1	synonymous	homozygous	c.T1326C	p.D442D	NA
MSTRG.10064.1	synonymous	homozygous	c.T132C	p.S44S	NA
MSTRG.10064.1	synonymous	homozygous	c.T1749C	p.N583N	NA
MSTRG.10064.1	synonymous	homozygous	c.T1962C	p.N654N	NA
MSTRG.10064.1	synonymous	homozygous	c.T816C	p.N272N	NA
MSTRG.10064.1	synonymous	homozygous	c.T966C	p.D322D	NA
MSTRG.10065.1	nonsynonymous	homozygous	c.A577C	p.K193Q	nonconservative
MSTRG.10065.1	nonsynonymous	homozygous	c.C79A	p.P27T	nonconservative
MSTRG.10065.1	nonsynonymous	homozygous	c.G121A	p.E41K	nonconservative
MSTRG.10065.1	nonsynonymous	homozygous	c.G139C	p.A47P	conservative
MSTRG.10065.1	nonsynonymous	homozygous	c.G289A	p.A97T	nonconservative
MSTRG.10065.1	nonsynonymous	homozygous	c.G65T	p.C22F	nonconservative
MSTRG.10065.1	nonsynonymous	homozygous	c.T545C	p.V182A	conservative
MSTRG.10065.1	nonsynonymous	homozygous	c.T601G	p.L201V	conservative
MSTRG.10065.1	synonymous	homozygous	c.A300G	p.K100K	NA
MSTRG.10065.1	synonymous	homozygous	c.A579G	p.K193K	NA
MSTRG.10065.2	nonsynonymous	homozygous	c.A535C	p.K179Q	nonconservative
MSTRG.10065.2	nonsynonymous	homozygous	c.C79A	p.P27T	nonconservative
MSTRG.10065.2	nonsynonymous	homozygous	c.G121A	p.E41K	nonconservative
MSTRG.10065.2	nonsynonymous	homozygous	c.G139C	p.A47P	conservative
MSTRG.10065.2	nonsynonymous	homozygous	c.G289A	p.A97T	nonconservative
MSTRG.10065.2	nonsynonymous	homozygous	c.G65T	p.C22F	nonconservative
MSTRG.10065.2	nonsynonymous	homozygous	c.T503C	p.V168A	conservative
MSTRG.10065.2	nonsynonymous	homozygous	c.T559G	p.L187V	conservative
MSTRG.10065.2	synonymous	homozygous	c.A300G	p.K100K	NA
MSTRG.10065.2	synonymous	homozygous	c.A537G	p.K179K	NA
MSTRG.10065.4	nonsynonymous	homozygous	c.C79A	p.P27T	nonconservative
MSTRG.10065.4	nonsynonymous	homozygous	c.G121A	p.E41K	nonconservative
MSTRG.10065.4	nonsynonymous	homozygous	c.G139C	p.A47P	conservative
MSTRG.10065.4	nonsynonymous	homozygous	c.G289A	p.A97T	nonconservative
MSTRG.10065.4	nonsynonymous	homozygous	c.G65T	p.C22F	nonconservative
MSTRG.10065.4	synonymous	homozygous	c.A300G	p.K100K	NA
MSTRG.10066.1	nonsynonymous	homozygous	c.T694A	p.F232I	conservative
MSTRG.10066.1	synonymous	homozygous	c.A150G	p.G50G	NA
MSTRG.10066.1	synonymous	homozygous	c.A339G	p.E113E	NA
MSTRG.10066.1	synonymous	homozygous	c.C408T	p.F136F	NA
MSTRG.10066.1	synonymous	homozygous	c.G672A	p.G224G	NA
MSTRG.10066.1	synonymous	homozygous	c.T369C	p.N123N	NA
MSTRG.10067.1	nonsynonymous	homozygous	c.A1432C	p.K478Q	nonconservative
MSTRG.10067.1	nonsynonymous	homozygous	c.A652G	p.I218V	conservative
MSTRG.10067.1	nonsynonymous	homozygous	c.G43A	p.A15T	nonconservative
MSTRG.10067.1	nonsynonymous	homozygous	c.G62C	p.R21T	nonconservative
MSTRG.10067.1	nonsynonymous	homozygous	c.G967A	p.V323I	conservative
MSTRG.10067.1	nonsynonymous	homozygous	c.T1148C	p.I383T	nonconservative
MSTRG.10067.1	nonsynonymous	homozygous	c.T393A	p.D131E	conservative
MSTRG.10067.1	nonsynonymous	homozygous	c.T431C	p.I144T	nonconservative
MSTRG.10067.1	nonsynonymous	homozygous	c.T558A	p.N186K	nonconservative
MSTRG.10067.1	synonymous	homozygous	c.A162G	p.G54G	NA
MSTRG.10067.1	synonymous	homozygous	c.A453G	p.K151K	NA
MSTRG.10067.1	synonymous	homozygous	c.A465G	p.K155K	NA
MSTRG.10067.1	synonymous	homozygous	c.A504G	p.P168P	NA
MSTRG.10067.1	synonymous	homozygous	c.A825G	p.E275E	NA
MSTRG.10067.1	synonymous	homozygous	c.A870T	p.A290A	NA
MSTRG.10067.1	synonymous	homozygous	c.A873G	p.K291K	NA
MSTRG.10067.1	synonymous	homozygous	c.C1110T	p.L370L	NA
MSTRG.10067.1	synonymous	homozygous	c.C237T	p.C79C	NA
MSTRG.10067.1	synonymous	homozygous	c.G1314C	p.L438L	NA
MSTRG.10067.1	synonymous	homozygous	c.G150A	p.G50G	NA
MSTRG.10067.1	synonymous	homozygous	c.G573A	p.K191K	NA
MSTRG.10067.1	synonymous	homozygous	c.G675A	p.L225L	NA
MSTRG.10067.1	synonymous	homozygous	c.G837A	p.L279L	NA
MSTRG.10067.1	synonymous	homozygous	c.T1203C	p.Y401Y	NA
MSTRG.10067.1	synonymous	homozygous	c.T411C	p.G137G	NA
MSTRG.10067.1	synonymous	homozygous	c.T906C	p.D302D	NA
MSTRG.10068.1	synonymous	homozygous	c.C472T	p.L158L	NA
MSTRG.10068.2	synonymous	homozygous	c.C535T	p.L179L	NA
MSTRG.1007.1	nonsynonymous	homozygous	c.A173T	p.K58M	nonconservative
MSTRG.1007.1	nonsynonymous	homozygous	c.A184G	p.K62E	nonconservative
MSTRG.1007.1	nonsynonymous	homozygous	c.A190G	p.N64D	nonconservative
MSTRG.1007.1	nonsynonymous	homozygous	c.A227G	p.N76S	conservative
MSTRG.1007.1	nonsynonymous	homozygous	c.A431G	p.Q144R	nonconservative
MSTRG.1007.1	nonsynonymous	homozygous	c.C211G	p.L71V	conservative
MSTRG.1007.1	nonsynonymous	homozygous	c.C422A	p.A141E	nonconservative
MSTRG.1007.1	nonsynonymous	heterozygous	c.T95G	p.F32C	nonconservative
MSTRG.1007.1	synonymous	homozygous	c.C387G	p.L129L	NA
MSTRG.10070.1	nonsynonymous	homozygous	c.A103G	p.S35G	nonconservative
MSTRG.10070.1	nonsynonymous	homozygous	c.T34A	p.F12I	conservative
MSTRG.10070.1	nonsynonymous	homozygous	c.T71G	p.I24S	nonconservative
MSTRG.10070.1	synonymous	homozygous	c.C48T	p.H16H	NA
MSTRG.10070.1	synonymous	homozygous	c.T75C	p.F25F	NA
MSTRG.10071.1	nonsynonymous	homozygous	c.A1370G	p.K457R	conservative
MSTRG.10071.1	nonsynonymous	homozygous	c.A1G	p.M1V	conservative
MSTRG.10071.1	nonsynonymous	homozygous	c.A3412G	p.S1138G	nonconservative
MSTRG.10071.1	nonsynonymous	homozygous	c.C2181G	p.D727E	conservative
MSTRG.10071.1	nonsynonymous	homozygous	c.G911A	p.R304K	conservative
MSTRG.10071.1	nonsynonymous	homozygous	c.T1612C	p.F538L	conservative
MSTRG.10071.1	nonsynonymous	homozygous	c.T1715G	p.I572S	nonconservative
MSTRG.10071.1	nonsynonymous	homozygous	c.T182A	p.I61N	nonconservative
MSTRG.10071.1	nonsynonymous	homozygous	c.T2083C	p.Y695H	nonconservative
MSTRG.10071.1	nonsynonymous	homozygous	c.T250G	p.L84V	conservative
MSTRG.10071.1	synonymous	homozygous	c.A1101G	p.R367R	NA
MSTRG.10071.1	synonymous	homozygous	c.A123G	p.L41L	NA
MSTRG.10071.1	synonymous	homozygous	c.A1389G	p.K463K	NA
MSTRG.10071.1	synonymous	homozygous	c.A1644G	p.L548L	NA
MSTRG.10071.1	synonymous	homozygous	c.A1923G	p.S641S	NA
MSTRG.10071.1	synonymous	homozygous	c.A1968G	p.S656S	NA
MSTRG.10071.1	synonymous	homozygous	c.A2199T	p.G733G	NA
MSTRG.10071.1	synonymous	homozygous	c.A3348G	p.K1116K	NA
MSTRG.10071.1	synonymous	homozygous	c.A3411G	p.R1137R	NA
MSTRG.10071.1	synonymous	homozygous	c.A681G	p.A227A	NA
MSTRG.10071.1	synonymous	homozygous	c.C1563G	p.S521S	NA
MSTRG.10071.1	synonymous	homozygous	c.C1743T	p.P581P	NA
MSTRG.10071.1	synonymous	homozygous	c.C2061T	p.P687P	NA
MSTRG.10071.1	synonymous	homozygous	c.C2566T	p.L856L	NA
MSTRG.10071.1	synonymous	homozygous	c.C2622G	p.L874L	NA
MSTRG.10071.1	synonymous	homozygous	c.C2994T	p.D998D	NA
MSTRG.10071.1	synonymous	homozygous	c.C345G	p.S115S	NA
MSTRG.10071.1	synonymous	homozygous	c.G1284A	p.K428K	NA
MSTRG.10071.1	synonymous	homozygous	c.G1530A	p.Q510Q	NA
MSTRG.10071.1	synonymous	homozygous	c.G1665A	p.E555E	NA
MSTRG.10071.1	synonymous	homozygous	c.G1806A	p.S602S	NA
MSTRG.10071.1	synonymous	homozygous	c.G1941T	p.T647T	NA
MSTRG.10071.1	synonymous	homozygous	c.G195A	p.E65E	NA
MSTRG.10071.1	synonymous	homozygous	c.G2055C	p.S685S	NA
MSTRG.10071.1	synonymous	homozygous	c.G3039A	p.L1013L	NA
MSTRG.10071.1	synonymous	homozygous	c.G3384T	p.V1128V	NA
MSTRG.10071.1	synonymous	homozygous	c.G3495A	p.Q1165Q	NA
MSTRG.10071.1	synonymous	homozygous	c.G774A	p.E258E	NA
MSTRG.10071.1	synonymous	homozygous	c.T1230C	p.V410V	NA
MSTRG.10071.1	synonymous	homozygous	c.T2160C	p.R720R	NA
MSTRG.10071.1	synonymous	homozygous	c.T2217C	p.G739G	NA
MSTRG.10071.1	synonymous	homozygous	c.T475C	p.L159L	NA
MSTRG.10071.1	synonymous	homozygous	c.T547C	p.L183L	NA
MSTRG.10071.2	nonsynonymous	homozygous	c.A1370G	p.K457R	conservative
MSTRG.10071.2	nonsynonymous	homozygous	c.A1G	p.M1V	conservative
MSTRG.10071.2	nonsynonymous	homozygous	c.A3568G	p.S1190G	nonconservative
MSTRG.10071.2	nonsynonymous	homozygous	c.C2181G	p.D727E	conservative
MSTRG.10071.2	nonsynonymous	homozygous	c.G911A	p.R304K	conservative
MSTRG.10071.2	nonsynonymous	homozygous	c.T1612C	p.F538L	conservative
MSTRG.10071.2	nonsynonymous	homozygous	c.T1715G	p.I572S	nonconservative
MSTRG.10071.2	nonsynonymous	homozygous	c.T182A	p.I61N	nonconservative
MSTRG.10071.2	nonsynonymous	homozygous	c.T2083C	p.Y695H	nonconservative
MSTRG.10071.2	nonsynonymous	homozygous	c.T250G	p.L84V	conservative
MSTRG.10071.2	synonymous	homozygous	c.A1101G	p.R367R	NA
MSTRG.10071.2	synonymous	homozygous	c.A123G	p.L41L	NA
MSTRG.10071.2	synonymous	homozygous	c.A1389G	p.K463K	NA
MSTRG.10071.2	synonymous	homozygous	c.A1644G	p.L548L	NA
MSTRG.10071.2	synonymous	homozygous	c.A1923G	p.S641S	NA
MSTRG.10071.2	synonymous	homozygous	c.A1968G	p.S656S	NA
MSTRG.10071.2	synonymous	homozygous	c.A2199T	p.G733G	NA
MSTRG.10071.2	synonymous	homozygous	c.A3504G	p.K1168K	NA
MSTRG.10071.2	synonymous	homozygous	c.A3567G	p.R1189R	NA
MSTRG.10071.2	synonymous	homozygous	c.A681G	p.A227A	NA
MSTRG.10071.2	synonymous	homozygous	c.C1563G	p.S521S	NA
MSTRG.10071.2	synonymous	homozygous	c.C1743T	p.P581P	NA
MSTRG.10071.2	synonymous	homozygous	c.C2061T	p.P687P	NA
MSTRG.10071.2	synonymous	homozygous	c.C2566T	p.L856L	NA
MSTRG.10071.2	synonymous	homozygous	c.C2622G	p.L874L	NA
MSTRG.10071.2	synonymous	homozygous	c.C3150T	p.D1050D	NA
MSTRG.10071.2	synonymous	homozygous	c.C345G	p.S115S	NA
MSTRG.10071.2	synonymous	homozygous	c.G1284A	p.K428K	NA
MSTRG.10071.2	synonymous	homozygous	c.G1530A	p.Q510Q	NA
MSTRG.10071.2	synonymous	homozygous	c.G1665A	p.E555E	NA
MSTRG.10071.2	synonymous	homozygous	c.G1806A	p.S602S	NA
MSTRG.10071.2	synonymous	homozygous	c.G1941T	p.T647T	NA
MSTRG.10071.2	synonymous	homozygous	c.G195A	p.E65E	NA
MSTRG.10071.2	synonymous	homozygous	c.G2055C	p.S685S	NA
MSTRG.10071.2	synonymous	homozygous	c.G3195A	p.L1065L	NA
MSTRG.10071.2	synonymous	homozygous	c.G3540T	p.V1180V	NA
MSTRG.10071.2	synonymous	homozygous	c.G3651A	p.Q1217Q	NA
MSTRG.10071.2	synonymous	homozygous	c.G774A	p.E258E	NA
MSTRG.10071.2	synonymous	homozygous	c.T1230C	p.V410V	NA
MSTRG.10071.2	synonymous	homozygous	c.T2160C	p.R720R	NA
MSTRG.10071.2	synonymous	homozygous	c.T2217C	p.G739G	NA
MSTRG.10071.2	synonymous	homozygous	c.T475C	p.L159L	NA
MSTRG.10071.2	synonymous	homozygous	c.T547C	p.L183L	NA
MSTRG.10072.1	nonsynonymous	homozygous	c.A1108G	p.I370V	conservative
MSTRG.10072.1	nonsynonymous	homozygous	c.A1257T	p.Q419H	nonconservative
MSTRG.10072.1	nonsynonymous	homozygous	c.A1335G	p.I445M	conservative
MSTRG.10072.1	nonsynonymous	homozygous	c.A16G	p.S6G	nonconservative
MSTRG.10072.1	nonsynonymous	homozygous	c.A796G	p.I266V	conservative
MSTRG.10072.1	nonsynonymous	homozygous	c.T734C	p.L245P	conservative
MSTRG.10072.1	synonymous	homozygous	c.A201G	p.Q67Q	NA
MSTRG.10072.1	synonymous	homozygous	c.A957G	p.K319K	NA
MSTRG.10072.1	synonymous	homozygous	c.C1381T	p.L461L	NA
MSTRG.10072.1	synonymous	homozygous	c.C597T	p.P199P	NA
MSTRG.10072.1	synonymous	homozygous	c.C867T	p.I289I	NA
MSTRG.10072.1	synonymous	homozygous	c.G12A	p.K4K	NA
MSTRG.10072.1	synonymous	homozygous	c.T1095A	p.T365T	NA
MSTRG.10072.1	synonymous	homozygous	c.T1317C	p.H439H	NA
MSTRG.10072.1	synonymous	homozygous	c.T856C	p.L286L	NA
MSTRG.10072.2	nonsynonymous	homozygous	c.A1156G	p.I386V	conservative
MSTRG.10072.2	nonsynonymous	homozygous	c.A1305T	p.Q435H	nonconservative
MSTRG.10072.2	nonsynonymous	homozygous	c.A1383G	p.I461M	conservative
MSTRG.10072.2	nonsynonymous	homozygous	c.A16G	p.S6G	nonconservative
MSTRG.10072.2	nonsynonymous	homozygous	c.A513T	p.R171S	nonconservative
MSTRG.10072.2	nonsynonymous	homozygous	c.A844G	p.I282V	conservative
MSTRG.10072.2	nonsynonymous	homozygous	c.T526G	p.C176G	nonconservative
MSTRG.10072.2	nonsynonymous	homozygous	c.T782C	p.L261P	conservative
MSTRG.10072.2	synonymous	homozygous	c.A1005G	p.K335K	NA
MSTRG.10072.2	synonymous	homozygous	c.A201G	p.Q67Q	NA
MSTRG.10072.2	synonymous	homozygous	c.C1429T	p.L477L	NA
MSTRG.10072.2	synonymous	homozygous	c.C645T	p.P215P	NA
MSTRG.10072.2	synonymous	homozygous	c.C915T	p.I305I	NA
MSTRG.10072.2	synonymous	homozygous	c.G12A	p.K4K	NA
MSTRG.10072.2	synonymous	homozygous	c.T1143A	p.T381T	NA
MSTRG.10072.2	synonymous	homozygous	c.T1365C	p.H455H	NA
MSTRG.10072.2	synonymous	homozygous	c.T904C	p.L302L	NA
MSTRG.10073.1	nonsynonymous	homozygous	c.A1045G	p.N349D	nonconservative
MSTRG.10073.1	nonsynonymous	homozygous	c.A1432T	p.T478S	conservative
MSTRG.10073.1	nonsynonymous	homozygous	c.G137A	p.R46K	conservative
MSTRG.10073.1	nonsynonymous	homozygous	c.G1592A	p.S531N	conservative
MSTRG.10073.1	nonsynonymous	homozygous	c.G294T	p.L98F	conservative
MSTRG.10073.1	nonsynonymous	homozygous	c.G400A	p.D134N	nonconservative
MSTRG.10073.1	nonsynonymous	homozygous	c.G515A	p.R172K	conservative
MSTRG.10073.1	nonsynonymous	homozygous	c.T799G	p.S267A	nonconservative
MSTRG.10073.1	synonymous	homozygous	c.A108G	p.K36K	NA
MSTRG.10073.1	synonymous	homozygous	c.A1098G	p.G366G	NA
MSTRG.10073.1	synonymous	homozygous	c.A1305G	p.P435P	NA
MSTRG.10073.1	synonymous	homozygous	c.A153G	p.G51G	NA
MSTRG.10073.1	synonymous	homozygous	c.A417G	p.P139P	NA
MSTRG.10073.1	synonymous	homozygous	c.C948T	p.N316N	NA
MSTRG.10073.1	synonymous	homozygous	c.G1290A	p.V430V	NA
MSTRG.10073.1	synonymous	homozygous	c.G303A	p.P101P	NA
MSTRG.10073.1	synonymous	homozygous	c.G393A	p.G131G	NA
MSTRG.10073.1	synonymous	homozygous	c.G522A	p.G174G	NA
MSTRG.10073.1	synonymous	homozygous	c.G723A	p.P241P	NA
MSTRG.10073.1	synonymous	homozygous	c.T1041C	p.C347C	NA
MSTRG.10073.1	synonymous	homozygous	c.T1116C	p.L372L	NA
MSTRG.10073.1	synonymous	homozygous	c.T1221C	p.D407D	NA
MSTRG.10073.1	synonymous	homozygous	c.T1326C	p.D442D	NA
MSTRG.10073.1	synonymous	homozygous	c.T1554G	p.P518P	NA
MSTRG.10073.1	synonymous	homozygous	c.T501C	p.L167L	NA
MSTRG.10073.1	synonymous	homozygous	c.T634C	p.L212L	NA
MSTRG.10073.1	synonymous	homozygous	c.T828C	p.A276A	NA
MSTRG.10073.1	synonymous	homozygous	c.T981C	p.Y327Y	NA
MSTRG.10074.1	nonsynonymous	homozygous	c.C751A	p.Q251K	nonconservative
MSTRG.10074.1	nonsynonymous	homozygous	c.C800T	p.A267V	conservative
MSTRG.10074.1	nonsynonymous	homozygous	c.G1015A	p.G339S	nonconservative
MSTRG.10074.1	nonsynonymous	homozygous	c.G647A	p.R216H	conservative
MSTRG.10074.1	nonsynonymous	homozygous	c.G838A	p.A280T	nonconservative
MSTRG.10074.1	nonsynonymous	homozygous	c.G985A	p.A329T	nonconservative
MSTRG.10074.1	synonymous	homozygous	c.A870G	p.R290R	NA
MSTRG.10074.1	synonymous	homozygous	c.C960T	p.A320A	NA
MSTRG.10074.1	synonymous	heterozygous	c.G588A	p.E196E	NA
MSTRG.10074.1	synonymous	homozygous	c.G831A	p.S277S	NA
MSTRG.10074.1	synonymous	homozygous	c.T648C	p.R216R	NA
MSTRG.10075.1	nonsynonymous	homozygous	c.A235G	p.T79A	nonconservative
MSTRG.10075.1	nonsynonymous	homozygous	c.A26G	p.N9S	conservative
MSTRG.10075.1	nonsynonymous	homozygous	c.C589G	p.L197V	conservative
MSTRG.10075.1	nonsynonymous	homozygous	c.C607A	p.P203T	nonconservative
MSTRG.10075.1	nonsynonymous	homozygous	c.C659T	p.S220L	nonconservative
MSTRG.10075.1	nonsynonymous	homozygous	c.G189A	p.M63I	conservative
MSTRG.10075.1	nonsynonymous	homozygous	c.G496A	p.E166K	nonconservative
MSTRG.10075.1	nonsynonymous	homozygous	c.G605A	p.R202K	conservative
MSTRG.10075.1	nonsynonymous	homozygous	c.T166C	p.C56R	nonconservative
MSTRG.10075.1	stopgain	homozygous	c.C16T	p.Q6X	NA
MSTRG.10075.1	synonymous	homozygous	c.T522C	p.A174A	NA
MSTRG.10076.1	nonsynonymous	homozygous	c.T343G	p.L115V	conservative
MSTRG.10076.1	synonymous	homozygous	c.A417G	p.K139K	NA
MSTRG.10076.1	synonymous	homozygous	c.A531G	p.P177P	NA
MSTRG.10076.1	synonymous	homozygous	c.C441T	p.R147R	NA
MSTRG.10076.1	synonymous	homozygous	c.C462T	p.T154T	NA
MSTRG.10076.1	synonymous	homozygous	c.C477T	p.D159D	NA
MSTRG.10076.1	synonymous	homozygous	c.C93T	p.V31V	NA
MSTRG.10076.1	synonymous	homozygous	c.G330A	p.R110R	NA
MSTRG.10076.1	synonymous	homozygous	c.G570A	p.G190G	NA
MSTRG.10076.1	synonymous	homozygous	c.G576T	p.T192T	NA
MSTRG.10076.1	synonymous	homozygous	c.G594A	p.T198T	NA
MSTRG.10076.1	synonymous	homozygous	c.T168C	p.R56R	NA
MSTRG.10077.1	nonsynonymous	homozygous	c.A2084G	p.E695G	nonconservative
MSTRG.10077.1	nonsynonymous	homozygous	c.A2222G	p.K741R	conservative
MSTRG.10077.1	nonsynonymous	homozygous	c.A275T	p.Q92L	nonconservative
MSTRG.10077.1	nonsynonymous	homozygous	c.A287G	p.N96S	conservative
MSTRG.10077.1	nonsynonymous	homozygous	c.A3000T	p.E1000D	conservative
MSTRG.10077.1	nonsynonymous	homozygous	c.A3262G	p.T1088A	nonconservative
MSTRG.10077.1	nonsynonymous	homozygous	c.A3292G	p.M1098V	conservative
MSTRG.10077.1	nonsynonymous	homozygous	c.C1722G	p.N574K	nonconservative
MSTRG.10077.1	nonsynonymous	homozygous	c.G1229A	p.R410K	conservative
MSTRG.10077.1	nonsynonymous	homozygous	c.G2825A	p.G942E	nonconservative
MSTRG.10077.1	nonsynonymous	homozygous	c.G3289A	p.E1097K	nonconservative
MSTRG.10077.1	nonsynonymous	homozygous	c.T3275C	p.F1092S	nonconservative
MSTRG.10077.1	nonsynonymous	homozygous	c.T527C	p.I176T	nonconservative
MSTRG.10077.1	synonymous	homozygous	c.A1041G	p.L347L	NA
MSTRG.10077.1	synonymous	homozygous	c.A1128G	p.Q376Q	NA
MSTRG.10077.1	synonymous	homozygous	c.A1176G	p.Q392Q	NA
MSTRG.10077.1	synonymous	homozygous	c.A1405C	p.R469R	NA
MSTRG.10077.1	synonymous	heterozygous	c.A1479G	p.Q493Q	NA
MSTRG.10077.1	synonymous	homozygous	c.A1494C	p.A498A	NA
MSTRG.10077.1	synonymous	homozygous	c.A1683C	p.T561T	NA
MSTRG.10077.1	synonymous	homozygous	c.A1794G	p.P598P	NA
MSTRG.10077.1	synonymous	homozygous	c.A213G	p.L71L	NA
MSTRG.10077.1	synonymous	homozygous	c.A2355G	p.L785L	NA
MSTRG.10077.1	synonymous	homozygous	c.A2916C	p.L972L	NA
MSTRG.10077.1	synonymous	homozygous	c.A438G	p.E146E	NA
MSTRG.10077.1	synonymous	homozygous	c.A618G	p.E206E	NA
MSTRG.10077.1	synonymous	homozygous	c.A771C	p.V257V	NA
MSTRG.10077.1	synonymous	homozygous	c.C1395T	p.N465N	NA
MSTRG.10077.1	synonymous	homozygous	c.C1725T	p.T575T	NA
MSTRG.10077.1	synonymous	homozygous	c.C1827A	p.L609L	NA
MSTRG.10077.1	synonymous	homozygous	c.C2013T	p.S671S	NA
MSTRG.10077.1	synonymous	homozygous	c.C2841A	p.P947P	NA
MSTRG.10077.1	synonymous	homozygous	c.C2914T	p.L972L	NA
MSTRG.10077.1	synonymous	homozygous	c.C435T	p.A145A	NA
MSTRG.10077.1	synonymous	homozygous	c.C504T	p.T168T	NA
MSTRG.10077.1	synonymous	homozygous	c.C681T	p.I227I	NA
MSTRG.10077.1	synonymous	homozygous	c.G1170A	p.T390T	NA
MSTRG.10077.1	synonymous	homozygous	c.G129A	p.T43T	NA
MSTRG.10077.1	synonymous	homozygous	c.G1842A	p.L614L	NA
MSTRG.10077.1	synonymous	homozygous	c.G2319A	p.V773V	NA
MSTRG.10077.1	synonymous	homozygous	c.G2460C	p.V820V	NA
MSTRG.10077.1	synonymous	homozygous	c.G2754A	p.K918K	NA
MSTRG.10077.1	synonymous	homozygous	c.G2979A	p.L993L	NA
MSTRG.10077.1	synonymous	homozygous	c.G3231A	p.R1077R	NA
MSTRG.10077.1	synonymous	homozygous	c.G540A	p.T180T	NA
MSTRG.10077.1	synonymous	homozygous	c.G882T	p.T294T	NA
MSTRG.10077.1	synonymous	homozygous	c.T1194C	p.D398D	NA
MSTRG.10077.1	synonymous	homozygous	c.T1539C	p.D513D	NA
MSTRG.10077.1	synonymous	homozygous	c.T1851C	p.S617S	NA
MSTRG.10077.1	synonymous	homozygous	c.T2097C	p.D699D	NA
MSTRG.10077.1	synonymous	homozygous	c.T2115C	p.D705D	NA
MSTRG.10077.1	synonymous	homozygous	c.T2283C	p.N761N	NA
MSTRG.10077.1	synonymous	homozygous	c.T231C	p.F77F	NA
MSTRG.10077.1	synonymous	homozygous	c.T2478C	p.T826T	NA
MSTRG.10077.1	synonymous	homozygous	c.T2547C	p.I849I	NA
MSTRG.10077.1	synonymous	homozygous	c.T2637C	p.I879I	NA
MSTRG.10077.1	synonymous	homozygous	c.T2766C	p.I922I	NA
MSTRG.10077.1	synonymous	homozygous	c.T3072C	p.N1024N	NA
MSTRG.10077.1	synonymous	homozygous	c.T639C	p.T213T	NA
MSTRG.10078.1	synonymous	homozygous	c.A258G	p.L86L	NA
MSTRG.10078.1	synonymous	homozygous	c.G366T	p.S122S	NA
MSTRG.10078.1	synonymous	homozygous	c.G465A	p.A155A	NA
MSTRG.10078.1	synonymous	homozygous	c.T132A	p.I44I	NA
MSTRG.10078.1	synonymous	homozygous	c.T234C	p.G78G	NA
MSTRG.10078.1	synonymous	homozygous	c.T348G	p.G116G	NA
MSTRG.10078.1	synonymous	homozygous	c.T357C	p.C119C	NA
MSTRG.10078.2	synonymous	homozygous	c.A258G	p.L86L	NA
MSTRG.10078.2	synonymous	homozygous	c.G390T	p.S130S	NA
MSTRG.10078.2	synonymous	homozygous	c.G489A	p.A163A	NA
MSTRG.10078.2	synonymous	homozygous	c.T132A	p.I44I	NA
MSTRG.10078.2	synonymous	homozygous	c.T234C	p.G78G	NA
MSTRG.10078.2	synonymous	homozygous	c.T372G	p.G124G	NA
MSTRG.10078.2	synonymous	homozygous	c.T381C	p.C127C	NA
MSTRG.10080.1	nonsynonymous	homozygous	c.A571C	p.T191P	nonconservative
MSTRG.10080.1	nonsynonymous	homozygous	c.A94T	p.I32F	conservative
MSTRG.10080.1	nonsynonymous	homozygous	c.G713A	p.S238N	conservative
MSTRG.10080.1	nonsynonymous	homozygous	c.G818A	p.R273Q	nonconservative
MSTRG.10080.1	nonsynonymous	homozygous	c.G81T	p.W27C	nonconservative
MSTRG.10080.1	nonsynonymous	homozygous	c.T56C	p.M19T	nonconservative
MSTRG.10080.1	nonsynonymous	homozygous	c.T634C	p.S212P	nonconservative
MSTRG.10080.1	synonymous	homozygous	c.A447G	p.P149P	NA
MSTRG.10080.1	synonymous	homozygous	c.A558T	p.A186A	NA
MSTRG.10080.1	synonymous	homozygous	c.G1053A	p.E351E	NA
MSTRG.10080.1	synonymous	homozygous	c.G210T	p.S70S	NA
MSTRG.10080.1	synonymous	homozygous	c.G489A	p.P163P	NA
MSTRG.10080.1	synonymous	homozygous	c.G870A	p.L290L	NA
MSTRG.10080.1	synonymous	homozygous	c.T336C	p.S112S	NA
MSTRG.10080.2	nonsynonymous	homozygous	c.A571C	p.T191P	nonconservative
MSTRG.10080.2	nonsynonymous	homozygous	c.A94T	p.I32F	conservative
MSTRG.10080.2	nonsynonymous	homozygous	c.G713A	p.S238N	conservative
MSTRG.10080.2	nonsynonymous	homozygous	c.G818A	p.R273Q	nonconservative
MSTRG.10080.2	nonsynonymous	homozygous	c.G81T	p.W27C	nonconservative
MSTRG.10080.2	nonsynonymous	homozygous	c.T56C	p.M19T	nonconservative
MSTRG.10080.2	nonsynonymous	homozygous	c.T634C	p.S212P	nonconservative
MSTRG.10080.2	synonymous	homozygous	c.A447G	p.P149P	NA
MSTRG.10080.2	synonymous	homozygous	c.A558T	p.A186A	NA
MSTRG.10080.2	synonymous	homozygous	c.G1074A	p.E358E	NA
MSTRG.10080.2	synonymous	homozygous	c.G210T	p.S70S	NA
MSTRG.10080.2	synonymous	homozygous	c.G489A	p.P163P	NA
MSTRG.10080.2	synonymous	homozygous	c.G870A	p.L290L	NA
MSTRG.10080.2	synonymous	homozygous	c.T336C	p.S112S	NA
MSTRG.10081.1	nonsynonymous	homozygous	c.T125C	p.V42A	conservative
MSTRG.10081.1	nonsynonymous	homozygous	c.T23C	p.L8P	conservative
MSTRG.10081.1	synonymous	homozygous	c.A81T	p.P27P	NA
MSTRG.10081.1	synonymous	homozygous	c.C318T	p.V106V	NA
MSTRG.10081.1	synonymous	homozygous	c.C342G	p.R114R	NA
MSTRG.10081.1	synonymous	homozygous	c.C436T	p.L146L	NA
MSTRG.10081.1	synonymous	homozygous	c.G249A	p.L83L	NA
MSTRG.10081.1	synonymous	homozygous	c.T150C	p.Y50Y	NA
MSTRG.10081.1	synonymous	homozygous	c.T285C	p.N95N	NA
MSTRG.10081.1	synonymous	homozygous	c.T46C	p.L16L	NA
MSTRG.10082.1	nonsynonymous	homozygous	c.A1184C	p.K395T	nonconservative
MSTRG.10082.1	nonsynonymous	homozygous	c.A1629G	p.I543M	conservative
MSTRG.10082.1	nonsynonymous	homozygous	c.A1952G	p.D651G	nonconservative
MSTRG.10082.1	nonsynonymous	homozygous	c.A2080G	p.I694V	conservative
MSTRG.10082.1	nonsynonymous	homozygous	c.A2096G	p.D699G	nonconservative
MSTRG.10082.1	nonsynonymous	homozygous	c.C206G	p.T69S	conservative
MSTRG.10082.1	nonsynonymous	homozygous	c.C260T	p.T87I	nonconservative
MSTRG.10082.1	nonsynonymous	homozygous	c.C421G	p.P141A	conservative
MSTRG.10082.1	nonsynonymous	homozygous	c.C644T	p.P215L	conservative
MSTRG.10082.1	nonsynonymous	homozygous	c.C8T	p.P3L	conservative
MSTRG.10082.1	nonsynonymous	homozygous	c.G10A	p.D4N	nonconservative
MSTRG.10082.1	nonsynonymous	homozygous	c.G122A	p.C41Y	conservative
MSTRG.10082.1	nonsynonymous	homozygous	c.G1349A	p.C450Y	conservative
MSTRG.10082.1	nonsynonymous	heterozygous	c.G139A	p.A47T	nonconservative
MSTRG.10082.1	nonsynonymous	homozygous	c.G1929C	p.E643D	conservative
MSTRG.10082.1	nonsynonymous	homozygous	c.G1937T	p.R646L	nonconservative
MSTRG.10082.1	nonsynonymous	homozygous	c.G2078A	p.G693D	nonconservative
MSTRG.10082.1	nonsynonymous	homozygous	c.G790T	p.V264L	conservative
MSTRG.10082.1	nonsynonymous	homozygous	c.G887A	p.R296H	conservative
MSTRG.10082.1	nonsynonymous	homozygous	c.G952C	p.G318R	nonconservative
MSTRG.10082.1	nonsynonymous	homozygous	c.T1157C	p.V386A	conservative
MSTRG.10082.1	nonsynonymous	homozygous	c.T503C	p.L168P	conservative
MSTRG.10082.1	nonsynonymous	homozygous	c.T686G	p.L229R	nonconservative
MSTRG.10082.1	nonsynonymous	homozygous	c.T695A	p.L232H	nonconservative
MSTRG.10082.1	nonsynonymous	homozygous	c.T782C	p.L261P	conservative
MSTRG.10082.1	nonsynonymous	heterozygous	c.T79A	p.Y27N	conservative
MSTRG.10082.1	synonymous	homozygous	c.A1197G	p.Q399Q	NA
MSTRG.10082.1	synonymous	homozygous	c.A1581G	p.T527T	NA
MSTRG.10082.1	synonymous	homozygous	c.A1842G	p.G614G	NA
MSTRG.10082.1	synonymous	homozygous	c.A237G	p.Q79Q	NA
MSTRG.10082.1	synonymous	homozygous	c.A504G	p.L168L	NA
MSTRG.10082.1	synonymous	homozygous	c.A960G	p.Q320Q	NA
MSTRG.10082.1	synonymous	homozygous	c.C1338T	p.G446G	NA
MSTRG.10082.1	synonymous	homozygous	c.C1671T	p.G557G	NA
MSTRG.10082.1	synonymous	homozygous	c.C1860T	p.C620C	NA
MSTRG.10082.1	synonymous	homozygous	c.G1332A	p.L444L	NA
MSTRG.10082.1	synonymous	homozygous	c.G1536A	p.L512L	NA
MSTRG.10082.1	synonymous	homozygous	c.G432A	p.G144G	NA
MSTRG.10082.1	synonymous	homozygous	c.G516A	p.R172R	NA
MSTRG.10082.1	synonymous	homozygous	c.G891T	p.T297T	NA
MSTRG.10082.1	synonymous	homozygous	c.T1158C	p.V386V	NA
MSTRG.10082.1	synonymous	homozygous	c.T1330C	p.L444L	NA
MSTRG.10082.1	synonymous	homozygous	c.T1731C	p.C577C	NA
MSTRG.10082.1	synonymous	homozygous	c.T1938C	p.R646R	NA
MSTRG.10082.1	synonymous	heterozygous	c.T234C	p.F78F	NA
MSTRG.10082.1	synonymous	heterozygous	c.T594G	p.T198T	NA
MSTRG.10082.1	synonymous	heterozygous	c.T618C	p.G206G	NA
MSTRG.10083.4	nonsynonymous	homozygous	c.A217G	p.I73V	conservative
MSTRG.10083.4	nonsynonymous	homozygous	c.A421G	p.T141A	nonconservative
MSTRG.10083.4	nonsynonymous	homozygous	c.A424G	p.T142A	nonconservative
MSTRG.10083.4	nonsynonymous	homozygous	c.C167G	p.A56G	conservative
MSTRG.10083.4	nonsynonymous	homozygous	c.C404T	p.P135L	conservative
MSTRG.10083.4	nonsynonymous	homozygous	c.G118A	p.V40I	conservative
MSTRG.10083.4	nonsynonymous	homozygous	c.T314C	p.V105A	conservative
MSTRG.10083.4	synonymous	homozygous	c.A318G	p.E106E	NA
MSTRG.10083.4	synonymous	homozygous	c.G393A	p.K131K	NA
MSTRG.10086.1	nonsynonymous	homozygous	c.A925G	p.S309G	nonconservative
MSTRG.10086.1	nonsynonymous	homozygous	c.C513A	p.H171Q	nonconservative
MSTRG.10086.1	nonsynonymous	homozygous	c.G235A	p.D79N	nonconservative
MSTRG.10086.1	nonsynonymous	homozygous	c.G2482A	p.V828M	conservative
MSTRG.10086.1	nonsynonymous	homozygous	c.T528G	p.H176Q	nonconservative
MSTRG.10086.1	synonymous	homozygous	c.A1455G	p.K485K	NA
MSTRG.10086.1	synonymous	homozygous	c.A1692G	p.Q564Q	NA
MSTRG.10086.1	synonymous	homozygous	c.A177G	p.G59G	NA
MSTRG.10086.1	synonymous	homozygous	c.A189G	p.T63T	NA
MSTRG.10086.1	synonymous	homozygous	c.A2070G	p.T690T	NA
MSTRG.10086.1	synonymous	homozygous	c.A495G	p.E165E	NA
MSTRG.10086.1	synonymous	homozygous	c.C1044T	p.T348T	NA
MSTRG.10086.1	synonymous	homozygous	c.C295T	p.L99L	NA
MSTRG.10086.1	synonymous	homozygous	c.G1149A	p.K383K	NA
MSTRG.10086.1	synonymous	homozygous	c.G1164A	p.K388K	NA
MSTRG.10086.1	synonymous	homozygous	c.G1167C	p.A389A	NA
MSTRG.10086.1	synonymous	homozygous	c.G1227A	p.G409G	NA
MSTRG.10086.1	synonymous	homozygous	c.G1818A	p.Q606Q	NA
MSTRG.10086.1	synonymous	homozygous	c.G1938A	p.R646R	NA
MSTRG.10086.1	synonymous	homozygous	c.G2310A	p.V770V	NA
MSTRG.10086.1	synonymous	homozygous	c.G465A	p.T155T	NA
MSTRG.10086.1	synonymous	homozygous	c.T2304C	p.G768G	NA
MSTRG.10086.1	synonymous	homozygous	c.T2385A	p.G795G	NA
MSTRG.10086.1	synonymous	homozygous	c.T348A	p.R116R	NA
MSTRG.10086.1	synonymous	homozygous	c.T732C	p.N244N	NA
MSTRG.10086.1	synonymous	homozygous	c.T852C	p.S284S	NA
MSTRG.10086.2	nonsynonymous	homozygous	c.A967G	p.S323G	nonconservative
MSTRG.10086.2	nonsynonymous	homozygous	c.G235A	p.D79N	nonconservative
MSTRG.10086.2	nonsynonymous	homozygous	c.G2524A	p.V842M	conservative
MSTRG.10086.2	nonsynonymous	homozygous	c.T570G	p.H190Q	nonconservative
MSTRG.10086.2	synonymous	homozygous	c.A1497G	p.K499K	NA
MSTRG.10086.2	synonymous	homozygous	c.A1734G	p.Q578Q	NA
MSTRG.10086.2	synonymous	homozygous	c.A177G	p.G59G	NA
MSTRG.10086.2	synonymous	homozygous	c.A189G	p.T63T	NA
MSTRG.10086.2	synonymous	homozygous	c.A2112G	p.T704T	NA
MSTRG.10086.2	synonymous	homozygous	c.C1086T	p.T362T	NA
MSTRG.10086.2	synonymous	homozygous	c.C295T	p.L99L	NA
MSTRG.10086.2	synonymous	homozygous	c.G1191A	p.K397K	NA
MSTRG.10086.2	synonymous	homozygous	c.G1206A	p.K402K	NA
MSTRG.10086.2	synonymous	homozygous	c.G1209C	p.A403A	NA
MSTRG.10086.2	synonymous	homozygous	c.G1269A	p.G423G	NA
MSTRG.10086.2	synonymous	homozygous	c.G1860A	p.Q620Q	NA
MSTRG.10086.2	synonymous	homozygous	c.G1980A	p.R660R	NA
MSTRG.10086.2	synonymous	homozygous	c.G2352A	p.V784V	NA
MSTRG.10086.2	synonymous	homozygous	c.G465A	p.T155T	NA
MSTRG.10086.2	synonymous	homozygous	c.T2346C	p.G782G	NA
MSTRG.10086.2	synonymous	homozygous	c.T2427A	p.G809G	NA
MSTRG.10086.2	synonymous	homozygous	c.T348A	p.R116R	NA
MSTRG.10086.2	synonymous	homozygous	c.T774C	p.N258N	NA
MSTRG.10086.2	synonymous	homozygous	c.T894C	p.S298S	NA
MSTRG.10087.2	nonsynonymous	homozygous	c.A217T	p.T73S	conservative
MSTRG.10087.2	nonsynonymous	homozygous	c.A43G	p.I15V	conservative
MSTRG.10087.2	nonsynonymous	homozygous	c.C203T	p.S68F	nonconservative
MSTRG.10087.2	nonsynonymous	homozygous	c.C420G	p.D140E	conservative
MSTRG.10087.2	nonsynonymous	homozygous	c.C450A	p.H150Q	nonconservative
MSTRG.10087.2	nonsynonymous	homozygous	c.G305T	p.R102L	nonconservative
MSTRG.10087.2	nonsynonymous	homozygous	c.G793A	p.V265I	conservative
MSTRG.10087.2	synonymous	homozygous	c.C405T	p.A135A	NA
MSTRG.10087.2	synonymous	homozygous	c.C453T	p.G151G	NA
MSTRG.10087.2	synonymous	heterozygous	c.C600T	p.V200V	NA
MSTRG.10087.2	synonymous	homozygous	c.G249A	p.K83K	NA
MSTRG.10087.2	synonymous	homozygous	c.G270A	p.T90T	NA
MSTRG.10087.2	synonymous	homozygous	c.G297A	p.S99S	NA
MSTRG.10087.2	synonymous	homozygous	c.G540A	p.G180G	NA
MSTRG.10087.2	synonymous	homozygous	c.T213C	p.N71N	NA
MSTRG.10087.2	synonymous	homozygous	c.T309C	p.N103N	NA
MSTRG.10087.2	synonymous	homozygous	c.T486C	p.Y162Y	NA
MSTRG.10088.1	nonsynonymous	homozygous	c.A370G	p.N124D	nonconservative
MSTRG.10088.1	nonsynonymous	homozygous	c.A724G	p.T242A	nonconservative
MSTRG.10088.1	nonsynonymous	homozygous	c.C344G	p.A115G	conservative
MSTRG.10088.1	nonsynonymous	homozygous	c.G224T	p.S75I	nonconservative
MSTRG.10088.1	nonsynonymous	homozygous	c.G463A	p.V155I	conservative
MSTRG.10088.1	nonsynonymous	homozygous	c.G610A	p.D204N	nonconservative
MSTRG.10088.1	synonymous	homozygous	c.C165A	p.L55L	NA
MSTRG.10088.1	synonymous	homozygous	c.G153A	p.K51K	NA
MSTRG.10088.1	synonymous	homozygous	c.T15A	p.G5G	NA
MSTRG.10088.1	synonymous	homozygous	c.T756C	p.L252L	NA
MSTRG.1009.1	nonsynonymous	homozygous	c.C869T	p.S290F	nonconservative
MSTRG.1009.1	nonsynonymous	homozygous	c.G809A	p.R270H	conservative
MSTRG.1009.1	nonsynonymous	homozygous	c.T194A	p.I65K	nonconservative
MSTRG.1009.1	synonymous	homozygous	c.G771A	p.V257V	NA
MSTRG.1009.1	synonymous	homozygous	c.G84C	p.G28G	NA
MSTRG.1009.1	synonymous	homozygous	c.T117C	p.D39D	NA
MSTRG.1009.1	synonymous	homozygous	c.T144C	p.F48F	NA
MSTRG.1009.1	synonymous	homozygous	c.T843C	p.L281L	NA
MSTRG.10091.1	nonsynonymous	homozygous	c.A10G	p.K4E	nonconservative
MSTRG.10091.1	nonsynonymous	homozygous	c.C122T	p.A41V	conservative
MSTRG.10091.1	nonsynonymous	homozygous	c.C83T	p.P28L	conservative
MSTRG.10091.1	nonsynonymous	homozygous	c.G13A	p.G5R	nonconservative
MSTRG.10091.1	nonsynonymous	homozygous	c.G97A	p.V33M	conservative
MSTRG.10091.1	nonsynonymous	homozygous	c.T422A	p.F141Y	nonconservative
MSTRG.10091.1	nonsynonymous	homozygous	c.T589A	p.S197T	conservative
MSTRG.10091.1	synonymous	homozygous	c.A315G	p.Q105Q	NA
MSTRG.10091.1	synonymous	homozygous	c.A540G	p.E180E	NA
MSTRG.10091.1	synonymous	homozygous	c.C396T	p.D132D	NA
MSTRG.10091.1	synonymous	homozygous	c.C510T	p.N170N	NA
MSTRG.10091.1	synonymous	homozygous	c.C567T	p.N189N	NA
MSTRG.10093.1	nonsynonymous	homozygous	c.A1376G	p.K459R	conservative
MSTRG.10093.1	nonsynonymous	homozygous	c.A1429T	p.I477L	conservative
MSTRG.10093.1	nonsynonymous	homozygous	c.A494G	p.N165S	conservative
MSTRG.10093.1	nonsynonymous	homozygous	c.A667G	p.T223A	nonconservative
MSTRG.10093.1	nonsynonymous	homozygous	c.C940G	p.L314V	conservative
MSTRG.10093.1	nonsynonymous	homozygous	c.G1424A	p.R475K	conservative
MSTRG.10093.1	nonsynonymous	homozygous	c.T319C	p.F107L	conservative
MSTRG.10093.1	synonymous	homozygous	c.C1164T	p.D388D	NA
MSTRG.10093.1	synonymous	homozygous	c.C1563T	p.H521H	NA
MSTRG.10093.1	synonymous	homozygous	c.G1251A	p.L417L	NA
MSTRG.10093.1	synonymous	homozygous	c.G1449A	p.L483L	NA
MSTRG.10093.1	synonymous	homozygous	c.G1569C	p.A523A	NA
MSTRG.10093.1	synonymous	homozygous	c.T1197C	p.V399V	NA
MSTRG.10093.1	synonymous	homozygous	c.T1570C	p.L524L	NA
MSTRG.10093.1	synonymous	homozygous	c.T360G	p.P120P	NA
MSTRG.10093.1	synonymous	homozygous	c.T516C	p.D172D	NA
MSTRG.10093.1	synonymous	homozygous	c.T534C	p.Y178Y	NA
MSTRG.10093.1	synonymous	heterozygous	c.T588C	p.D196D	NA
MSTRG.10093.1	synonymous	homozygous	c.T651C	p.D217D	NA
MSTRG.10093.1	synonymous	homozygous	c.T987G	p.P329P	NA
MSTRG.10094.1	nonsynonymous	homozygous	c.A1255G	p.I419V	conservative
MSTRG.10094.1	nonsynonymous	homozygous	c.A1271G	p.E424G	nonconservative
MSTRG.10094.1	nonsynonymous	homozygous	c.A1321G	p.T441A	nonconservative
MSTRG.10094.1	nonsynonymous	homozygous	c.A1525G	p.T509A	nonconservative
MSTRG.10094.1	nonsynonymous	homozygous	c.A1717G	p.S573G	nonconservative
MSTRG.10094.1	nonsynonymous	homozygous	c.A1780G	p.I594V	conservative
MSTRG.10094.1	nonsynonymous	homozygous	c.A292G	p.I98V	conservative
MSTRG.10094.1	nonsynonymous	homozygous	c.A664G	p.T222A	nonconservative
MSTRG.10094.1	nonsynonymous	homozygous	c.A691G	p.I231V	conservative
MSTRG.10094.1	nonsynonymous	homozygous	c.A73T	p.T25S	conservative
MSTRG.10094.1	nonsynonymous	homozygous	c.A880T	p.T294S	conservative
MSTRG.10094.1	nonsynonymous	heterozygous	c.C2056T	p.L686F	conservative
MSTRG.10094.1	nonsynonymous	homozygous	c.C715T	p.R239C	nonconservative
MSTRG.10094.1	nonsynonymous	homozygous	c.C881T	p.T294I	nonconservative
MSTRG.10094.1	nonsynonymous	homozygous	c.G1993A	p.V665M	conservative
MSTRG.10094.1	nonsynonymous	homozygous	c.G2333A	p.G778E	nonconservative
MSTRG.10094.1	nonsynonymous	homozygous	c.T763A	p.C255S	conservative
MSTRG.10094.1	synonymous	homozygous	c.A1998G	p.G666G	NA
MSTRG.10094.1	synonymous	homozygous	c.A834G	p.L278L	NA
MSTRG.10094.1	synonymous	homozygous	c.C1074T	p.N358N	NA
MSTRG.10094.1	synonymous	homozygous	c.C1119G	p.L373L	NA
MSTRG.10094.1	synonymous	homozygous	c.C1305T	p.S435S	NA
MSTRG.10094.1	synonymous	homozygous	c.C1425T	p.T475T	NA
MSTRG.10094.1	synonymous	homozygous	c.C150T	p.Y50Y	NA
MSTRG.10094.1	synonymous	homozygous	c.C1560T	p.V520V	NA
MSTRG.10094.1	synonymous	homozygous	c.C1764T	p.L588L	NA
MSTRG.10094.1	synonymous	homozygous	c.C1818T	p.C606C	NA
MSTRG.10094.1	synonymous	homozygous	c.C1948T	p.L650L	NA
MSTRG.10094.1	synonymous	homozygous	c.C1962T	p.F654F	NA
MSTRG.10094.1	synonymous	homozygous	c.C2016T	p.T672T	NA
MSTRG.10094.1	synonymous	homozygous	c.C222T	p.T74T	NA
MSTRG.10094.1	synonymous	homozygous	c.C2514T	p.S838S	NA
MSTRG.10094.1	synonymous	homozygous	c.C30T	p.R10R	NA
MSTRG.10094.1	synonymous	homozygous	c.C366T	p.V122V	NA
MSTRG.10094.1	synonymous	homozygous	c.C441T	p.P147P	NA
MSTRG.10094.1	synonymous	homozygous	c.C486T	p.G162G	NA
MSTRG.10094.1	synonymous	homozygous	c.C6T	p.N2N	NA
MSTRG.10094.1	synonymous	homozygous	c.G1488A	p.L496L	NA
MSTRG.10094.1	synonymous	homozygous	c.G1674A	p.V558V	NA
MSTRG.10094.1	synonymous	homozygous	c.G96A	p.A32A	NA
MSTRG.10094.1	synonymous	heterozygous	c.T1092C	p.I364I	NA
MSTRG.10094.1	synonymous	homozygous	c.T1944C	p.S648S	NA
MSTRG.10094.1	synonymous	homozygous	c.T2079C	p.P693P	NA
MSTRG.10094.1	synonymous	homozygous	c.T405C	p.N135N	NA
MSTRG.10094.1	synonymous	homozygous	c.T801G	p.S267S	NA
MSTRG.10095.1	synonymous	homozygous	c.C261G	p.V87V	NA
MSTRG.10095.1	synonymous	homozygous	c.T61C	p.L21L	NA
MSTRG.10096.1	nonsynonymous	homozygous	c.A1729G	p.T577A	nonconservative
MSTRG.10096.1	nonsynonymous	homozygous	c.A2380G	p.T794A	nonconservative
MSTRG.10096.1	nonsynonymous	homozygous	c.A2726C	p.E909A	nonconservative
MSTRG.10096.1	nonsynonymous	homozygous	c.A847T	p.N283Y	conservative
MSTRG.10096.1	nonsynonymous	homozygous	c.A880G	p.I294V	conservative
MSTRG.10096.1	nonsynonymous	homozygous	c.A886C	p.T296P	nonconservative
MSTRG.10096.1	nonsynonymous	homozygous	c.C2150T	p.A717V	conservative
MSTRG.10096.1	nonsynonymous	homozygous	c.C2999T	p.A1000V	conservative
MSTRG.10096.1	nonsynonymous	homozygous	c.G1361A	p.S454N	conservative
MSTRG.10096.1	nonsynonymous	homozygous	c.G1709A	p.R570Q	nonconservative
MSTRG.10096.1	nonsynonymous	homozygous	c.G1973A	p.R658K	conservative
MSTRG.10096.1	nonsynonymous	homozygous	c.G2635A	p.V879M	conservative
MSTRG.10096.1	nonsynonymous	homozygous	c.G3110C	p.S1037T	conservative
MSTRG.10096.1	nonsynonymous	homozygous	c.G3145A	p.V1049I	conservative
MSTRG.10096.1	nonsynonymous	homozygous	c.G799A	p.V267I	conservative
MSTRG.10096.1	nonsynonymous	homozygous	c.G830A	p.S277N	conservative
MSTRG.10096.1	nonsynonymous	homozygous	c.T1301C	p.V434A	conservative
MSTRG.10096.1	nonsynonymous	homozygous	c.T2509A	p.L837M	conservative
MSTRG.10096.1	nonsynonymous	homozygous	c.T3005C	p.V1002A	conservative
MSTRG.10096.1	nonsynonymous	homozygous	c.T3100G	p.S1034A	nonconservative
MSTRG.10096.1	synonymous	homozygous	c.A1542G	p.G514G	NA
MSTRG.10096.1	synonymous	homozygous	c.A2061G	p.R687R	NA
MSTRG.10096.1	synonymous	homozygous	c.A2094G	p.P698P	NA
MSTRG.10096.1	synonymous	homozygous	c.A2169G	p.G723G	NA
MSTRG.10096.1	synonymous	homozygous	c.A2193G	p.L731L	NA
MSTRG.10096.1	synonymous	homozygous	c.A240G	p.A80A	NA
MSTRG.10096.1	synonymous	homozygous	c.A2475T	p.V825V	NA
MSTRG.10096.1	synonymous	homozygous	c.A2919G	p.R973R	NA
MSTRG.10096.1	synonymous	homozygous	c.A3102T	p.S1034S	NA
MSTRG.10096.1	synonymous	homozygous	c.A3117G	p.Q1039Q	NA
MSTRG.10096.1	synonymous	homozygous	c.A477G	p.K159K	NA
MSTRG.10096.1	synonymous	homozygous	c.A570G	p.S190S	NA
MSTRG.10096.1	synonymous	homozygous	c.A891G	p.Q297Q	NA
MSTRG.10096.1	synonymous	homozygous	c.A951G	p.Q317Q	NA
MSTRG.10096.1	synonymous	homozygous	c.C1728A	p.G576G	NA
MSTRG.10096.1	synonymous	homozygous	c.C1740T	p.L580L	NA
MSTRG.10096.1	synonymous	heterozygous	c.C1788T	p.F596F	NA
MSTRG.10096.1	synonymous	homozygous	c.C2892T	p.I964I	NA
[truncated: 358,709+ more rows]
