# Supplementary material for: Identification of Novel Genes and Proteoforms in Angiostrongylus costaricensis through a Proteogenomic Approach
Source: Pathogens. 2022 Oct 31;11(11):1273. doi: 10.3390/pathogens11111273 (PMC9694666; doi:10.3390/pathogens11111273)
Supplement: Supplementary file 1 [file pathogens-11-01273-s001.zip › Supplemental_Data_S10.xlsx]

## Sheet: SAAVs
Supplemental Data S10. Nucleotide and amino acid substitutions per transcript and their identified peptides
Transcript ID	SNV	Alelle	Nucleotide substitution	Amino acid substitution	Conservation of amino acid substitution	Identified peptide
MSTRG.1005.1	nonsynonymous	c.C752T	p.A251V	homozygous	conservative	SYVNILPPLNID[A-V]LQEIESDNPFCVDVHR
MSTRG.1005.1	nonsynonymous	c.C788T	p.A263V	homozygous	conservative	SYVNILPPLNIDVLQEIESDNPFC[A-V]DVHR
MSTRG.1005.1	nonsynonymous	c.G911C	p.S304T	homozygous	conservative	EYQTN[S-T]FAVGISHALNIAEVPK
MSTRG.1005.1	synonymous	c.A897G	p.E299E	homozygous	NA	[E-E]YQTNTFAVGISHALNIAEVPK
MSTRG.1005.1	synonymous	c.A927T	p.I309I	homozygous	NA	EYQTNTFAVG[I-I]SHALNIAEVPK
MSTRG.10058.1	nonsynonymous	c.G1171A	p.D391N	homozygous	nonconservative	ILQNSGLPIITAN[D-N]LSDAAEK
MSTRG.10067.1	nonsynonymous	c.G967A	p.V323I	homozygous	conservative	TDAHGHVIVDQYQNTSNSSILC[V-I]GDATGK
MSTRG.10067.1	nonsynonymous	c.T1148C	p.I383T	homozygous	nonconservative	LFNNESSNYLPYENIATVVFSHPLVGTVGLTEAEAI[I-T]K
MSTRG.10067.1	nonsynonymous	c.T1148C	p.I383T	homozygous	nonconservative	SHPLVGTVGLTEAEAI[I-T]K
MSTRG.10067.1	synonymous	c.C1110T	p.L370L	homozygous	NA	LFNNESSNYLPYENIATVVFSHP[L-L]VGTVGLTEAEAITK
MSTRG.10067.1	synonymous	c.C1110T	p.L370L	homozygous	NA	SHP[L-L]VGTVGLTEAEAITK
MSTRG.10067.1	synonymous	c.T906C	p.D302D	homozygous	NA	T[D-D]AHGHVIVDQYQNTSNSSILCIGDATGK
MSTRG.10080.1	nonsynonymous	c.A571C	p.T191P	homozygous	nonconservative	IDQSIHQAVIST[T-P]SQDK
MSTRG.10080.1	nonsynonymous	c.T634C	p.S212P	homozygous	nonconservative	SPVQAIQVYGALEPNR[S-P]R
MSTRG.10080.1	synonymous	c.A558T	p.A186A	homozygous	NA	IDQSIHQ[A-A]VISTPSQDK
MSTRG.10080.2	nonsynonymous	c.A571C	p.T191P	homozygous	nonconservative	IDQSIHQAVIST[T-P]SQDK
MSTRG.10080.2	nonsynonymous	c.T634C	p.S212P	homozygous	nonconservative	SPVQAIQVYGALEPNR[S-P]R
MSTRG.10080.2	synonymous	c.A558T	p.A186A	homozygous	NA	IDQSIHQ[A-A]VISTPSQDK
MSTRG.10088.1	nonsynonymous	c.G610A	p.D204N	homozygous	nonconservative	VLSYSPGPV[D-N]TAMHDIIAK
MSTRG.10097.1	nonsynonymous	c.C182T	p.A61V	homozygous	conservative	SDLDELESLLENIDEEQEIED[A-V]TPAK
MSTRG.10107.1	nonsynonymous	c.C182T	p.A61V	homozygous	conservative	KLEEIG[A-V]SVQVIEAGK
MSTRG.10107.1	nonsynonymous	c.G73T	p.A25S	homozygous	nonconservative	AVFAAIDEHQNEFVA[A-S]LK
MSTRG.10112.1	nonsynonymous	c.A1060G	p.I354V	homozygous	conservative	TFVP[I-V]ENVSHSVEVLPGAR
MSTRG.10112.1	nonsynonymous	c.C1070T	p.A357V	heterozygous	conservative	TFVPVEN[A-V]SHSVEVLPGAR
MSTRG.10112.1	nonsynonymous	c.G157C	p.E53Q	homozygous	nonconservative	AGDSI[E-Q]NLETDLSDGLK
MSTRG.10112.1	synonymous	c.T186C	p.G62G	homozygous	NA	AGDSIQNLETDLSD[G-G]LK
MSTRG.10125.1	nonsynonymous	c.A137G	p.N46S	homozygous	conservative	[N-S]AADSLGLTHTLINAPPGDWSR
MSTRG.10125.1	nonsynonymous	c.A139G	p.T47A	homozygous	nonconservative	S[T-A]ADSLGLTHTLINAPPGDWSR
MSTRG.10125.1	nonsynonymous	c.A340G	p.I114V	homozygous	conservative	VHVMAGIPSSSNE[I-V]DIADLFLNNITYAATK
MSTRG.10125.1	nonsynonymous	c.A739G	p.S247G	homozygous	nonconservative	LLQSTNPGWIVGLEHNFHEAH[S-G]APLEWIR
MSTRG.10125.1	synonymous	c.C375T	p.T125T	homozygous	NA	VHVMAGIPSSSNEVDIADLFLNNI[T-T]YAATK
MSTRG.10130.1	nonsynonymous	c.C391T	p.P131S	homozygous	nonconservative	AGATAM[P-S]QHLSGMATMLSPGLDASTSIQSISEHLK
MSTRG.10130.1	nonsynonymous	c.C391T	p.P131S	homozygous	nonconservative	[P-S]QHLSGMATMLSPGLDASTSIQSISEHLK
MSTRG.10130.1	nonsynonymous	c.G2866T	p.A956S	homozygous	nonconservative	IEQI[A-S]PFPYDLIEAECHK
MSTRG.10130.1	nonsynonymous	c.G2904C	p.Q968H	homozygous	nonconservative	IEQISPFPYDLIEAEC[Q-H]K
MSTRG.10130.1	nonsynonymous	c.G415A	p.A139T	homozygous	nonconservative	AGATAMSQHLSGMA[A-T]MLSPGLDASTSIQSISEHLK
MSTRG.10130.1	nonsynonymous	c.G415A	p.A139T	homozygous	nonconservative	LSGMA[A-T]MLSPGLDASTSIQSISEHLK
MSTRG.10130.1	nonsynonymous	c.G415A	p.A139T	homozygous	nonconservative	SQHLSGMA[A-T]MLSPGLDASTSIQSISEHLK
MSTRG.1014.1	nonsynonymous	c.A980T	p.E327V	homozygous	nonconservative	LPFDRPELMDWSLL[E-V]VNLPQASEHYR
MSTRG.1014.1	synonymous	c.T976C	p.L326L	homozygous	NA	LPFDRPELMDWSL[L-L]VVNLPQASEHYR
MSTRG.10159.1	nonsynonymous	c.A1252G	p.T418A	homozygous	nonconservative	[T-A]NQENSTQSHCEVMR
MSTRG.10159.1	synonymous	c.C1281T	p.H427H	homozygous	NA	ANQENSTQS[H-H]CEVMR
MSTRG.1017.1	nonsynonymous	c.G1031A	p.R344K	homozygous	conservative	LETEEAYETAEESDGGDM[R-K]
MSTRG.10173.1	nonsynonymous	c.A1083G	p.I361M	homozygous	conservative	SIGFSP[I-M]IDTPSLLHDHNEFLNESVFLR
MSTRG.10173.1	synonymous	c.G1104A	p.L368L	homozygous	NA	SIGFSPMIDTPSL[L-L]HDHNEFLNESVFLR
MSTRG.10205.1	nonsynonymous	c.A425G	p.K142R	homozygous	conservative	LNVDDDIDGIIVQLPLDC[K-R]
MSTRG.10205.1	nonsynonymous	c.T247C	p.S83P	homozygous	nonconservative	SENPGFNVVLAIVQVGNR[S-P]DSNVYIGAK
MSTRG.10205.1	synonymous	c.A246G	p.R82R	homozygous	NA	SENPGFNVVLAIVQVGN[R-R]PDSNVYIGAK
MSTRG.10205.1	synonymous	c.T231C	p.V77V	homozygous	NA	SENPGFNVVLAI[V-V]QVGNRPDSNVYIGAK
MSTRG.10205.3	nonsynonymous	c.A1530G	p.I510M	homozygous	conservative	AVVSNHWSSGGIGAIQLAQAL[I-M]DVTSGPR
MSTRG.10205.3	nonsynonymous	c.G1498A	p.V500I	homozygous	conservative	AVVSNHWSSGG[V-I]GAIQLAQALMDVTSGPR
MSTRG.10205.3	nonsynonymous	c.T529C	p.Y177H	homozygous	nonconservative	MFHESTQSD[Y-H]ALFNR
MSTRG.10205.3	synonymous	c.A1545G	p.G515G	homozygous	NA	AVVSNHWSSGGIGAIQLAQALMDVTS[G-G]PR
MSTRG.10205.3	synonymous	c.A537G	p.L179L	homozygous	NA	MFHESTQSDHA[L-L]FNR
MSTRG.10205.3	synonymous	c.T535C	p.L179L	homozygous	NA	MFHESTQSDHA[L-L]FNR
MSTRG.10219.1	nonsynonymous	c.G190T	p.G64C	homozygous	nonconservative	EIQAEQQLSQENL[G-C]GSSAPTFQGFNIATK
MSTRG.10219.1	synonymous	c.G201A	p.S67S	homozygous	NA	EIQAEQQLSQENLCGS[S-S]APTFQGFNIATK
MSTRG.1026.1	nonsynonymous	c.G151A	p.V51M	homozygous	conservative	LISEV[V-M]EGVEVGYLCTLGDNLILEK
MSTRG.1026.1	nonsynonymous	c.G209A	p.R70K	homozygous	conservative	LISEVMEGVEVGYLCTLGDNLILE[R-K]
MSTRG.1026.1	synonymous	c.T180C	p.C60C	homozygous	NA	LISEVMEGVEVGYL[C-C]TLGDNLILEK
MSTRG.10260.1	nonsynonymous	c.A2022T	p.K674N	homozygous	nonconservative	IYVDTLTVEDTSHELE[K-N]AEINLLK
MSTRG.10260.1	nonsynonymous	c.G2003C	p.R668T	homozygous	nonconservative	IYVDTLTVED[R-T]SHELENAEINLLK
MSTRG.10326.1	nonsynonymous	c.A118G	p.M40V	homozygous	conservative	MDPFGMLGG[M-V]GMLEGPLLGSPSR
MSTRG.10341.1	nonsynonymous	c.G721C	p.V241L	homozygous	conservative	THLIVSHINSE[V-L]ISVYK
MSTRG.10345.1	nonsynonymous	c.G556A	p.V186I	homozygous	conservative	VHLSDN[V-I]YNPTTTPPTTTAR
MSTRG.10345.1	nonsynonymous	c.G586A	p.A196T	homozygous	nonconservative	VHLSDNIYNPTTTPPT[A-T]TAR
MSTRG.10348.1	nonsynonymous	c.T1044A	p.D348E	homozygous	conservative	YYRPT[D-E]VDTLLGDSSK
MSTRG.10351.1	nonsynonymous	c.G100A	p.D34N	homozygous	nonconservative	TMAEIL[D-N]ADQDDESLAK
MSTRG.10351.1	nonsynonymous	c.G50A	p.R17Q	homozygous	nonconservative	TENVTENVAENVDDE[R-Q]ENQYRPPEK
MSTRG.10351.1	nonsynonymous	c.T17C	p.M6T	homozygous	nonconservative	TENV[M-T]ENVAENVDDEQENQYRPPEK
MSTRG.10351.1	synonymous	c.T45C	p.D15D	homozygous	NA	TENVTENVAENVD[D-D]EQENQYRPPEK
MSTRG.1036.1	nonsynonymous	c.G392A	p.G131D	homozygous	nonconservative	DFMGCITSS[G-D]MFIPSGEVK
MSTRG.10366.1	nonsynonymous	c.C784T	p.L262F	homozygous	conservative	IDRDEPISGTLPNIGSFAENP[L-F]VLR
MSTRG.10366.1	nonsynonymous	c.G1049C	p.G350A	homozygous	conservative	EQNA[G-A]NAVLHTFGAAVAEASR
MSTRG.10366.1	nonsynonymous	c.T721A	p.F241I	homozygous	conservative	[F-I]DRDEPISGTLPNIGSFAENPFVLR
MSTRG.10366.1	synonymous	c.A1047G	p.A349A	homozygous	NA	EQN[A-A]ANAVLHTFGAAVAEASR
MSTRG.10366.2	nonsynonymous	c.C784T	p.L262F	homozygous	conservative	IDRDEPISGTLPNIGSFAENP[L-F]VLR
MSTRG.10366.2	nonsynonymous	c.G1049C	p.G350A	homozygous	conservative	EQNA[G-A]NAVLHTFGAAVAEASR
MSTRG.10366.2	nonsynonymous	c.T721A	p.F241I	homozygous	conservative	[F-I]DRDEPISGTLPNIGSFAENPFVLR
MSTRG.10366.2	synonymous	c.A1047G	p.A349A	homozygous	NA	EQN[A-A]ANAVLHTFGAAVAEASR
MSTRG.10373.1	nonsynonymous	c.G4415A	p.S1472N	homozygous	conservative	TVHVVNLDPAAESF[S-N]YPASIDVR
MSTRG.10373.1	synonymous	c.T4392C	p.L1464L	homozygous	NA	TVHVVN[L-L]DPAAESFNYPASIDVR
MSTRG.10373.2	nonsynonymous	c.G4376A	p.S1459N	homozygous	conservative	TVHVVNLDPAAESF[S-N]YPASIDVR
MSTRG.10373.2	synonymous	c.T4353C	p.L1451L	homozygous	NA	TVHVVN[L-L]DPAAESFNYPASIDVR
MSTRG.10385.1	nonsynonymous	c.A262G	p.I88V	homozygous	conservative	YGTNPHQKPDAEVY[I-V]VEEK
MSTRG.10385.2	nonsynonymous	c.A658G	p.I220V	homozygous	conservative	YGTNPHQKPDAEVY[I-V]VEEK
MSTRG.10403.1	nonsynonymous	c.A931G	p.N311D	homozygous	nonconservative	NDGSAGGNTSSHS[N-D]GSNAFPSDMK
MSTRG.10403.1	nonsynonymous	c.G892A	p.D298N	homozygous	nonconservative	[D-N]DGSAGGNTSSHSDGSNAFPSDMK
MSTRG.10403.1	nonsynonymous	c.G896A	p.G299D	homozygous	nonconservative	N[G-D]GSAGGNTSSHSDGSNAFPSDMK
MSTRG.10403.1	synonymous	c.G918C	p.T306T	homozygous	NA	NDGSAGGN[T-T]SSHSDGSNAFPSDMK
MSTRG.10448.1	nonsynonymous	c.A145G	p.T49A	homozygous	nonconservative	LTENNS[T-A]LHQPSLETMR
MSTRG.10448.1	nonsynonymous	c.T370A	p.L124M	homozygous	conservative	[L-M]MGMHEPIGDWGHEYVR
MSTRG.10479.1	nonsynonymous	c.A1285T	p.M429L	homozygous	conservative	KTDTCTC[M-L]NPFSDLK
MSTRG.10479.1	nonsynonymous	c.A77G	p.N26S	homozygous	conservative	AFCH[N-S]PPNFGIGAFDESVGK
MSTRG.10491.1	nonsynonymous	c.A176G	p.E59G	homozygous	nonconservative	SVLSSGQISQ[E-G]HHISEEQLPMK
MSTRG.10491.1	nonsynonymous	c.T179A	p.L60H	homozygous	nonconservative	SVLSSGQISQG[L-H]HISEEQLPMK
MSTRG.10491.1	nonsynonymous	c.T266C	p.V89A	homozygous	conservative	RPPLSQEECDAINAGG[V-A]YGL
MSTRG.10501.1	nonsynonymous	c.G1729T	p.A577S	homozygous	nonconservative	IGGAGYHGDPASALLELLDPEQN[A-S]NFNDHFLDVPVDLSR
MSTRG.10501.1	nonsynonymous	c.G2509C	p.A837P	homozygous	conservative	DGPSAGVTIVSSLLSLALNR[A-P]VK
MSTRG.10501.1	synonymous	c.A1707G	p.E569E	homozygous	NA	IGGAGYHGDPASALL[E-E]LLDPEQNSNFNDHFLDVPVDLSR
MSTRG.10501.1	synonymous	c.T1701A	p.L567L	homozygous	NA	IGGAGYHGDPASA[L-L]LELLDPEQNSNFNDHFLDVPVDLSR
MSTRG.10501.1	synonymous	c.T2472C	p.T824T	homozygous	NA	DGPSAGV[T-T]IVSSLLSLALNRPVK
MSTRG.10527.1	nonsynonymous	c.A3586G	p.S1196G	homozygous	nonconservative	SLLSDE[S-G]DDGGNLWSSISNSLNR
MSTRG.10527.1	nonsynonymous	c.A3595G	p.S1199G	homozygous	nonconservative	SLLSDEGDD[S-G]GNLWSSISNSLNR
MSTRG.10527.1	nonsynonymous	c.C2863T	p.P955S	homozygous	nonconservative	HSTVTLIAEE[P-S]K
MSTRG.10527.1	synonymous	c.C3603T	p.N1201N	homozygous	NA	SLLSDEGDDGG[N-N]LWSSISNSLNR
MSTRG.10527.1	synonymous	c.T3606C	p.L1202L	homozygous	NA	SLLSDEGDDGGN[L-L]WSSISNSLNR
MSTRG.10527.1	synonymous	c.T3627C	p.S1209S	homozygous	NA	SLLSDEGDDGGNLWSSISN[S-S]LNR
MSTRG.10531.2	nonsynonymous	c.T670A	p.S224T	homozygous	conservative	[S-T]GAAHAVIDVLGPAR
MSTRG.10531.2	synonymous	c.C699G	p.V233V	homozygous	NA	TGAAHAVID[V-V]LGPAR
MSTRG.10531.2	synonymous	c.T700C	p.L234L	homozygous	NA	TGAAHAVIDV[L-L]GPAR
MSTRG.10534.1	nonsynonymous	c.C529T	p.P177S	homozygous	nonconservative	RADESDNAEW[P-S]AITVLAEDLLR
MSTRG.10534.1	nonsynonymous	c.T562C	p.C188R	homozygous	nonconservative	RADESDNAEWSAITVLAEDLL[C-R]
MSTRG.10535.1	nonsynonymous	c.A140C	p.Q47P	homozygous	nonconservative	AFTNPELAPPNVESQEEEHEGR[Q-P]VGIMSSDYQLSMK
MSTRG.10535.1	nonsynonymous	c.A1514G	p.Y505C	homozygous	conservative	GTSVTSDLVTAVS[Y-C]LEDWK
MSTRG.10535.1	nonsynonymous	c.A674G	p.E225G	homozygous	nonconservative	LSESTEPSNLLQ[E-G]ANHGEIVNLGAALPDEIMMQAAK
MSTRG.10535.1	nonsynonymous	c.A737C	p.E246A	homozygous	nonconservative	LSESTEPSNLLQGANHGEIVNLGAALPDEIMMQ[E-A]AK
MSTRG.10535.1	nonsynonymous	c.C92T	p.S31L	homozygous	nonconservative	AFTNPE[S-L]APPNVESQEEEHEGRPVGIMSSDYQLSMK
MSTRG.10535.1	nonsynonymous	c.G100C	p.A34P	homozygous	conservative	AFTNPELAP[A-P]NVESQEEEHEGRPVGIMSSDYQLSMK
MSTRG.10535.1	nonsynonymous	c.G1487C	p.S496T	homozygous	conservative	GTSV[S-T]SDLVTAVSCLEDWK
MSTRG.10535.1	nonsynonymous	c.G642C	p.R214S	homozygous	nonconservative	L[R-S]ESTEPSNLLQGANHGEIVNLGAALPDEIMMQAAK
MSTRG.10535.1	nonsynonymous	c.T1421C	p.I474T	homozygous	nonconservative	AETAEPDTEATNSIFN[I-T]VLNAK
MSTRG.10535.1	synonymous	c.G168A	p.Q56Q	homozygous	NA	AFTNPELAPPNVESQEEEHEGRPVGIMSSDY[Q-Q]LSMK
MSTRG.10535.1	synonymous	c.T708G	p.A236A	homozygous	NA	LSESTEPSNLLQGANHGEIVNLG[A-A]ALPDEIMMQAAK
MSTRG.10540.1	nonsynonymous	c.C463G	p.L155V	homozygous	conservative	QEY[L-V]YLGSMLSPYASGEWK
MSTRG.10540.1	nonsynonymous	c.G97A	p.A33T	homozygous	nonconservative	SSCVDGVDNIIQIYD[A-T]TEGNGK
MSTRG.10540.1	synonymous	c.A54C	p.S18S	homozygous	NA	[S-S]SCVDGVDNIIQIYDTTEGNGK
MSTRG.10540.1	synonymous	c.T495A	p.A165A	homozygous	NA	QEYVYLGSMLSPY[A-A]SGEWK
MSTRG.10547.1	nonsynonymous	c.C46T	p.P16S	homozygous	nonconservative	VHITTFVLPTGTAT[P-S]QSK
MSTRG.10548.1	nonsynonymous	c.G376A	p.V126M	homozygous	conservative	IWVPDTYFSTGNEL[V-M]NGNR
MSTRG.10548.1	synonymous	c.T384C	p.G128G	homozygous	NA	IWVPDTYFSTGNELMN[G-G]NR
MSTRG.10553.1	nonsynonymous	c.A484G	p.N162D	homozygous	nonconservative	H[N-D]IDAIHPGYGFLSER
MSTRG.10553.1	nonsynonymous	c.A679T	p.T227S	homozygous	conservative	QAAIEAGVQVVPGTATPI[T-S]SAEEAIEFAK
MSTRG.10553.1	synonymous	c.C696T	p.A232A	homozygous	NA	QAAIEAGVQVVPGTATPISSAEE[A-A]IEFAK
MSTRG.10553.1	synonymous	c.T528C	p.R176R	homozygous	NA	HDIDAIHPGYGFLSE[R-R]
MSTRG.10553.2	nonsynonymous	c.A484G	p.N162D	homozygous	nonconservative	H[N-D]IDAIHPGYGFLSER
MSTRG.10553.2	nonsynonymous	c.A679T	p.T227S	homozygous	conservative	QAAIEAGVQVVPGTATPI[T-S]SAEEAIEFAK
MSTRG.10553.2	synonymous	c.C696T	p.A232A	homozygous	NA	QAAIEAGVQVVPGTATPISSAEE[A-A]IEFAK
MSTRG.10553.2	synonymous	c.T528C	p.R176R	homozygous	NA	HDIDAIHPGYGFLSE[R-R]
MSTRG.10558.1	nonsynonymous	c.G427A	p.V143I	homozygous	conservative	AINGLVDGSVLH[V-I]VEEPYTIR
MSTRG.10558.1	nonsynonymous	c.T415A	p.C139S	homozygous	conservative	AINGLVDG[C-S]VLHIVEEPYTIR
MSTRG.10558.1	synonymous	c.A423G	p.L141L	homozygous	NA	AINGLVDGSV[L-L]HIVEEPYTIR
MSTRG.10564.1	nonsynonymous	c.A1118G	p.K373R	homozygous	conservative	IAASRPEHADLLFVDENVYAMLLEGVESSE[K-R]
MSTRG.10564.1	nonsynonymous	c.T1049A	p.L350H	homozygous	nonconservative	IAASRPE[L-H]ADLLFVDENVYAMLLEGVESSER
MSTRG.10564.1	synonymous	c.A1074G	p.E358E	homozygous	NA	IAASRPEHADLLFVD[E-E]NVYAMLLEGVESSER
MSTRG.10564.1	synonymous	c.A1116G	p.E372E	homozygous	NA	IAASRPEHADLLFVDENVYAMLLEGVESS[E-E]R
MSTRG.10569.1	nonsynonymous	c.A637C	p.T213P	homozygous	nonconservative	GLFPDNFVELVQVPINTQSGVVYH[T-P]PPPQHVK
MSTRG.10569.1	nonsynonymous	c.T655G	p.F219V	homozygous	conservative	GLFPDNFVELVQVPINTQSGVVYHPPPPQH[F-V]K
MSTRG.10569.1	synonymous	c.G618A	p.Q206Q	homozygous	NA	GLFPDNFVELVQVPINT[Q-Q]SGVVYHPPPPQHVK
MSTRG.10569.1	synonymous	c.G621C	p.S207S	homozygous	NA	GLFPDNFVELVQVPINTQ[S-S]GVVYHPPPPQHVK
MSTRG.10583.1	nonsynonymous	c.C1202A	p.T401N	homozygous	conservative	QDLAF[T-N]LSPDWQVDYECYTWTK
MSTRG.10583.1	nonsynonymous	c.C1235G	p.S412C	homozygous	conservative	QDLAFNLSPDWQVDYE[S-C]YTWTK
MSTRG.10583.1	nonsynonymous	c.T1196C	p.V399A	homozygous	conservative	QDL[V-A]FNLSPDWQVDYECYTWTK
MSTRG.10583.1	nonsynonymous	c.T1241C	p.M414T	homozygous	nonconservative	QDLAFNLSPDWQVDYECY[M-T]WTK
MSTRG.10583.1	synonymous	c.T1212G	p.P404P	homozygous	NA	QDLAFNLS[P-P]DWQVDYECYTWTK
MSTRG.10615.1	nonsynonymous	c.C74T	p.A25V	homozygous	conservative	EFST[A-V]LRHPDSPEWFNK
MSTRG.10615.1	nonsynonymous	c.G709A	p.V237I	homozygous	conservative	DAV[V-I]QHYIELHPQDFDHFNDR
MSTRG.10615.1	synonymous	c.T744C	p.F248F	homozygous	NA	DAVIQHYIELHPQD[F-F]DHFNDR
MSTRG.10615.2	nonsynonymous	c.G295A	p.V99I	homozygous	conservative	DAV[V-I]QHYIELHPQDFDHFNDR
MSTRG.10615.2	synonymous	c.T330C	p.F110F	homozygous	NA	DAVIQHYIELHPQD[F-F]DHFNDR
MSTRG.10615.5	nonsynonymous	c.C74T	p.A25V	homozygous	conservative	EFST[A-V]LRHPDSPEWFNK
MSTRG.10616.2	nonsynonymous	c.T473C	p.V158A	homozygous	conservative	SP[V-A]EIDLGEFLHSIQGGVR
MSTRG.10616.2	synonymous	c.C486T	p.L162L	homozygous	NA	SPAEID[L-L]GEFLHSIQGGVR
MSTRG.10616.2	synonymous	c.C496T	p.L166L	homozygous	NA	SPAEIDLGEF[L-L]HSIQGGVR
MSTRG.10616.2	synonymous	c.C504T	p.S168S	homozygous	NA	SPAEIDLGEFLH[S-S]IQGGVR
MSTRG.10647.1	nonsynonymous	c.G1756C	p.E586Q	homozygous	nonconservative	QALFDTLT[E-Q]EIEGLLTK
MSTRG.10660.1	nonsynonymous	c.G307C	p.V103L	heterozygous	conservative	SSVLQGMFLTSGT[V-L]QSQLSHAVHLMAK
MSTRG.10660.1	nonsynonymous	c.T342G	p.I114M	homozygous	conservative	SSVLQGMFLTSGTLQSQLSHAVHL[I-M]AK
MSTRG.10660.1	synonymous	c.T321C	p.L107L	homozygous	NA	SSVLQGMFLTSGTLQSQ[L-L]SHAVHLMAK
MSTRG.10665.1	nonsynonymous	c.G154A	p.A52T	homozygous	nonconservative	YSGIINDNGVS[A-T]VNGINTVYANIGGR
MSTRG.10696.1	nonsynonymous	c.G25A	p.A9T	homozygous	nonconservative	QV[A-T]ITGDVCDVGGQDAILR
MSTRG.10696.1	nonsynonymous	c.T161C	p.V54A	homozygous	conservative	EISEQKPEFAAVHVQGLLSA[V-A]DPDFVAK
MSTRG.10696.1	synonymous	c.C151T	p.L51L	homozygous	NA	EISEQKPEFAAVHVQGL[L-L]SAADPDFVAK
MSTRG.10696.1	synonymous	c.C51T	p.V17V	homozygous	NA	QVTITGDVCD[V-V]GGQDAILR
MSTRG.10696.1	synonymous	c.G24T	p.V8V	homozygous	NA	Q[V-V]TITGDVCDVGGQDAILR
MSTRG.10718.1	nonsynonymous	c.A440G	p.N147S	homozygous	conservative	FGHVFLFDTGTSNG[N-S]LSGQSR
MSTRG.10718.1	synonymous	c.A432G	p.S144S	homozygous	NA	FGHVFLFDTGT[S-S]NGSLSGQSR
MSTRG.1073.1	nonsynonymous	c.G3521T	p.R1174I	homozygous	nonconservative	PAEDAAPQLLDSFLATS[R-I]QSECTEEQR
MSTRG.1073.1	synonymous	c.T3513C	p.A1171A	homozygous	NA	PAEDAAPQLLDSFL[A-A]TSIQSECTEEQR
MSTRG.1073.1	synonymous	c.T3534C	p.C1178C	homozygous	NA	PAEDAAPQLLDSFLATSIQSE[C-C]TEEQR
MSTRG.10795.1	nonsynonymous	c.A46G	p.T16A	homozygous	nonconservative	SEP[T-A]YTETDPTPDVIGLEFVR
MSTRG.10795.1	nonsynonymous	c.G709A	p.V237M	homozygous	conservative	VEQTNLETT[V-M]PLPADNTPK
MSTRG.10795.1	nonsynonymous	c.T718C	p.S240P	homozygous	nonconservative	VEQTNLETTMPL[S-P]ADNTPK
MSTRG.10834.1	nonsynonymous	c.G382A	p.A128T	homozygous	nonconservative	EAEAAQVLNE[A-T]HQSDAATR
MSTRG.10834.1	synonymous	c.A402T	p.A134A	homozygous	NA	EAEAAQVLNETHQSDA[A-A]TR
MSTRG.10834.1	synonymous	c.G354A	p.E118E	homozygous	NA	[E-E]AEAAQVLNETHQSDAATR
MSTRG.10872.1	nonsynonymous	c.G75C	p.E25D	homozygous	conservative	TSEWI[E-D]LTNPATNEVISR
MSTRG.10872.1	nonsynonymous	c.G814C	p.V272L	homozygous	conservative	EQTLNQ[V-L]TAAAFGAAGQR
MSTRG.10872.1	synonymous	c.T96C	p.N32N	homozygous	NA	TSEWIDLTNPAT[N-N]EVISR
MSTRG.10883.1	nonsynonymous	c.G110A	p.C37Y	homozygous	conservative	TGACSTAEALSGSASALS[C-Y]AECHTQIETPEQR
MSTRG.10883.1	synonymous	c.A105G	p.L35L	homozygous	NA	TGACSTAEALSGSASA[L-L]SYAECHTQIETPEQR
MSTRG.10883.1	synonymous	c.A114T	p.A38A	homozygous	NA	TGACSTAEALSGSASALSY[A-A]ECHTQIETPEQR
MSTRG.10883.1	synonymous	c.T66C	p.C22C	homozygous	NA	TGA[C-C]STAEALSGSASALSYAECHTQIETPEQR
MSTRG.10892.1	nonsynonymous	c.T589G	p.S197A	homozygous	nonconservative	LIESAPDEGIDPELQ[S-A]MMGFGGFGTTK
MSTRG.10892.1	synonymous	c.A561G	p.P187P	homozygous	NA	LIESA[P-P]DEGIDPELQAMMGFGGFGTTK
MSTRG.10892.1	synonymous	c.T573C	p.I191I	homozygous	NA	LIESAPDEG[I-I]DPELQAMMGFGGFGTTK
MSTRG.10973.1	nonsynonymous	c.A520G	p.M174V	homozygous	conservative	EVYSFYQLAQHHEQL[M-V]STMTEALK
MSTRG.10973.1	nonsynonymous	c.C4078T	p.H1360Y	homozygous	nonconservative	TPIPESGQASITAATPLVENIAAIQQSEPV[H-Y]PHTATK
MSTRG.10973.1	nonsynonymous	c.C4961G	p.T1654R	homozygous	nonconservative	TSTTATTSYVQMAASRPFEAE[T-R]
MSTRG.10973.1	nonsynonymous	c.C558G	p.H186Q	homozygous	nonconservative	TLV[H-Q]AQHDGDIALASK
MSTRG.10973.1	nonsynonymous	c.G2233A	p.V745I	homozygous	conservative	KVET[V-I]YESFMEQEEMK
MSTRG.10973.1	nonsynonymous	c.G4016C	p.C1339S	homozygous	conservative	TPIPESGQA[C-S]ITAATPLVENIAAIQQSEPVYPHTATK
MSTRG.10973.1	nonsynonymous	c.G518T	p.R173L	homozygous	nonconservative	EVYSFYQLAQHHEQ[R-L]VSTMTEALK
MSTRG.10973.1	nonsynonymous	c.G593A	p.R198K	homozygous	conservative	TLVQAQHDGDIALAS[R-K]
MSTRG.10973.1	nonsynonymous	c.G6199A	p.V2067I	homozygous	conservative	IIDEGNGIHSLII[V-I]R
MSTRG.10973.1	synonymous	c.A3990G	p.T1330T	homozygous	NA	[T-T]PIPESGQASITAATPLVENIAAIQQSEPVYPHTATK
MSTRG.10973.1	synonymous	c.A4065G	p.Q1355Q	homozygous	NA	TPIPESGQASITAATPLVENIAAIQ[Q-Q]SEPVYPHTATK
MSTRG.10973.1	synonymous	c.C4038T	p.L1346L	homozygous	NA	TPIPESGQASITAATP[L-L]VENIAAIQQSEPVYPHTATK
MSTRG.10973.1	synonymous	c.T6168C	p.D2056D	homozygous	NA	II[D-D]EGNGIHSLIIIR
MSTRG.10973.4	nonsynonymous	c.A520G	p.M174V	homozygous	conservative	EVYSFYQLAQHHEQL[M-V]STMTEALK
MSTRG.10973.4	nonsynonymous	c.C558G	p.H186Q	homozygous	nonconservative	TLV[H-Q]AQHDGDIALASK
MSTRG.10973.4	nonsynonymous	c.G518T	p.R173L	homozygous	nonconservative	EVYSFYQLAQHHEQ[R-L]VSTMTEALK
MSTRG.10973.4	nonsynonymous	c.G593A	p.R198K	homozygous	conservative	TLVQAQHDGDIALAS[R-K]
MSTRG.110.1	nonsynonymous	c.A526G	p.T176A	homozygous	nonconservative	KLEDAINPQTCLVSVM[T-A]VNNEIGVIQPIK
MSTRG.11012.3	nonsynonymous	c.T2287A	p.F763I	homozygous	conservative	LRPTLLIPHSEDTQETTLEGVLESDQNFLYIEA[F-I]PANTLK
MSTRG.11012.3	synonymous	c.G2286A	p.A762A	homozygous	NA	LRPTLLIPHSEDTQETTLEGVLESDQNFLYIE[A-A]IPANTLK
MSTRG.11012.3	synonymous	c.T2203C	p.L735L	homozygous	NA	LRPTL[L-L]IPHSEDTQETTLEGVLESDQNFLYIEAIPANTLK
MSTRG.11012.3	synonymous	c.T2223C	p.D741D	heterozygous	NA	LRPTLLIPHSE[D-D]TQETTLEGVLESDQNFLYIEAIPANTLK
MSTRG.11020.2	nonsynonymous	c.A178G	p.I60V	homozygous	conservative	KVTSD[I-V]EGHPTPR
MSTRG.11020.2	synonymous	c.A165G	p.K55K	homozygous	NA	[K-K]VTSDVEGHPTPR
MSTRG.11031.1	nonsynonymous	c.C526T	p.P176S	homozygous	nonconservative	T[P-S]ATSASNGNQPGGGAQPR
MSTRG.11036.1	nonsynonymous	c.A350T	p.N117I	homozygous	nonconservative	QGEIDAAENDF[N-I]AVLSVENSNTEVENK
MSTRG.11036.1	synonymous	c.C358T	p.L120L	homozygous	NA	QGEIDAAENDFIAV[L-L]SVENSNTEVENK
MSTRG.11036.1	synonymous	c.C381T	p.T127T	homozygous	NA	QGEIDAAENDFIAVLSVENSN[T-T]EVENK
MSTRG.1104.3	nonsynonymous	c.A477T	p.E159D	homozygous	conservative	LFDEVHQMQGLTL[E-D]VLEK
MSTRG.11067.1	nonsynonymous	c.C977T	p.S326L	homozygous	nonconservative	FIEGASHWVMQDVP[S-L]R
MSTRG.11067.1	nonsynonymous	c.G761A	p.G254D	homozygous	nonconservative	HVFSQP[G-D]ALSGPINYYR
MSTRG.11067.1	synonymous	c.G747A	p.V249V	homozygous	NA	H[V-V]FSQPDALSGPINYYR
MSTRG.11068.1	nonsynonymous	c.G188T	p.S63I	homozygous	nonconservative	SAQLQPEAAS[S-I]GDGDKPMGDK
MSTRG.11077.1	nonsynonymous	c.G284A	p.R95H	homozygous	conservative	[R-H]DDSTGTPSPSFSDTSK
MSTRG.11077.1	nonsynonymous	c.G284A	p.R95H	homozygous	conservative	R[R-H]DDSTGTPSPSFSDTSK
MSTRG.11077.1	synonymous	c.T303C	p.T101T	homozygous	NA	HDDSTG[T-T]PSPSFSDTSK
MSTRG.11077.1	synonymous	c.T303C	p.T101T	homozygous	NA	RHDDSTG[T-T]PSPSFSDTSK
MSTRG.11078.1	nonsynonymous	c.G1999A	p.A667T	homozygous	nonconservative	DRPDTKPV[A-T]TNSSTTDTGGEGTK
MSTRG.11078.1	synonymous	c.A1983G	p.P661P	homozygous	NA	DR[P-P]DTKPVTTNSSTTDTGGEGTK
MSTRG.11078.1	synonymous	c.G2016A	p.T672T	homozygous	NA	DRPDTKPVTTNSS[T-T]TDTGGEGTK
MSTRG.11080.1	nonsynonymous	c.A1633G	p.S545G	homozygous	nonconservative	LSHL[S-G]VDTSLFGQCLTR
MSTRG.11080.1	synonymous	c.A1659G	p.Q553Q	homozygous	NA	LSHLGVDTSLFG[Q-Q]CLTR
MSTRG.11118.1	nonsynonymous	c.A2111G	p.K704R	homozygous	conservative	[K-R]GDVQGQTTNSTGPPSDSVSK
MSTRG.11118.1	nonsynonymous	c.C2146G	p.R716G	homozygous	nonconservative	RGDVQGQTTNST[R-G]PPSDSVSK
MSTRG.11128.1	nonsynonymous	c.G599C	p.G200A	homozygous	conservative	[G-A]ISDPNTAAFMVEPIQGEAGVVVPDDGYLK
MSTRG.11128.1	synonymous	c.C657T	p.G219G	homozygous	NA	AISDPNTAAFMVEPIQGEA[G-G]VVVPDDGYLK
MSTRG.11129.2	nonsynonymous	c.G1990A	p.A664T	homozygous	nonconservative	IGSSTGWGSSSG[A-T]GFGSSSAWER
MSTRG.11129.3	nonsynonymous	c.G2005A	p.A669T	homozygous	nonconservative	IGSSTGWGSSSG[A-T]GFGSSSAWER
MSTRG.11131.1	nonsynonymous	c.A883G	p.I295V	homozygous	conservative	SPSSTEHPNEAPVVLHASSEQSDAT[I-V]MVGAR
MSTRG.11131.1	nonsynonymous	c.A889G	p.M297V	homozygous	conservative	SPSSTEHPNEAPVVLHASSEQSDATVM[M-V]GAR
MSTRG.11131.1	nonsynonymous	c.T809C	p.L270S	homozygous	nonconservative	[L-S]PSSTEHPNEAPVVLHASSEQSDATVMVGAR
MSTRG.11131.1	synonymous	c.T849G	p.V283V	homozygous	NA	SPSSTEHPNEAPV[V-V]LHASSEQSDATVMVGAR
MSTRG.11160.1	nonsynonymous	c.A1272G	p.I424M	homozygous	conservative	[I-M]DTLPTASNQTHVNTSSFDPAPK
MSTRG.11160.1	nonsynonymous	c.A1441G	p.T481A	homozygous	nonconservative	[T-A]VNSSGTLEGSITQNTNHFEAGSPTSASGR
MSTRG.11160.1	nonsynonymous	c.G1484A	p.S495N	homozygous	conservative	AVNSSGTLEGSITQ[S-N]TNHFEAGSPTSASGR
MSTRG.11160.1	nonsynonymous	c.T1313C	p.I438T	homozygous	nonconservative	MDTLPTASNQTHVN[I-T]SSFDPAPK
MSTRG.11160.1	nonsynonymous	c.T346C	p.S116P	homozygous	nonconservative	SPYMNTGEQPTSAV[S-P]TAR
MSTRG.11160.1	synonymous	c.A1464T	p.L488L	homozygous	NA	AVNSSGT[L-L]EGSITQNTNHFEAGSPTSASGR
MSTRG.11160.1	synonymous	c.G1308A	p.V436V	homozygous	NA	MDTLPTASNQTH[V-V]NTSSFDPAPK
MSTRG.11160.1	synonymous	c.G336T	p.T112T	homozygous	NA	SPYMNTGEQP[T-T]SAVPTAR
MSTRG.11160.1	synonymous	c.G339A	p.S113S	homozygous	NA	SPYMNTGEQPT[S-S]AVPTAR
MSTRG.11160.1	synonymous	c.T1287G	p.T429T	homozygous	NA	MDTLP[T-T]ASNQTHVNTSSFDPAPK
MSTRG.11161.1	nonsynonymous	c.A994G	p.K332E	homozygous	nonconservative	TA[K-E]PLALSQQPTQAGSPDTR
MSTRG.11170.1	nonsynonymous	c.A202G	p.I68V	homozygous	conservative	DHVELIADHNG[I-V]VQFFK
MSTRG.11174.1	nonsynonymous	c.C157G	p.P53A	homozygous	conservative	VSEEQTAFHEQAGTG[P-A]TR
MSTRG.11199.1	nonsynonymous	c.A1043G	p.N348S	homozygous	conservative	SNGLGPVLAGNSTLPVINCPPVNE[N-S]NMMLDIWSSVR
MSTRG.11199.1	nonsynonymous	c.A269G	p.K90R	homozygous	conservative	LLNSIGLATHFVAEAGDNEFVA[K-R]
MSTRG.11199.1	nonsynonymous	c.G1168A	p.V390I	homozygous	conservative	ILASHDYM[V-I]FGK
MSTRG.11199.1	nonsynonymous	c.G889A	p.A297T	homozygous	nonconservative	[A-T]THETLEILSEYENDEFPTVIIAVAGR
MSTRG.11199.1	nonsynonymous	c.G935A	p.G312E	homozygous	nonconservative	TTHETLEILSEYEND[G-E]FPTVIIAVAGR
MSTRG.11199.1	nonsynonymous	c.T944C	p.M315T	homozygous	nonconservative	TTHETLEILSEYENDEFP[M-T]VIIAVAGR
MSTRG.11199.1	synonymous	c.C1161T	p.D387D	homozygous	NA	ILASH[D-D]YMIFGK
MSTRG.112.1	nonsynonymous	c.A738C	p.K246N	homozygous	nonconservative	H[K-N]IKPEEPYYSPELEIDGTFPVVDFMR
MSTRG.112.1	nonsynonymous	c.C773T	p.P258L	homozygous	conservative	HNIKPEEPYYSPE[P-L]EIDGTFPVVDFMR
MSTRG.112.1	nonsynonymous	c.G229A	p.V77I	homozygous	conservative	VILLED[V-I]EGVGHQFDVVDVDR
MSTRG.112.1	nonsynonymous	c.G776A	p.G259E	homozygous	nonconservative	HNIKPEEPYYSPEL[G-E]IDGTFPVVDFMR
MSTRG.112.1	synonymous	c.C783T	p.D261D	homozygous	NA	HNIKPEEPYYSPELEI[D-D]GTFPVVDFMR
MSTRG.11211.1	nonsynonymous	c.G295A	p.A99T	homozygous	nonconservative	IQNLSSLVNLE[A-T]LDLSFNR
MSTRG.11211.1	synonymous	c.C288T	p.N96N	homozygous	NA	IQNLSSLV[N-N]LETLDLSFNR
MSTRG.11217.1	nonsynonymous	c.A365C	p.E122A	homozygous	nonconservative	IVGQLVV[E-A]NTQLETLDALVGK
MSTRG.11217.1	synonymous	c.A348C	p.V116V	homozygous	NA	I[V-V]GQLVVANTQLETLDALVGK
MSTRG.11229.1	nonsynonymous	c.G817A	p.A273T	homozygous	nonconservative	T[A-T]DANYADFDQPSSSEMR
MSTRG.11229.1	synonymous	c.G816A	p.T272T	homozygous	NA	[T-T]TDANYADFDQPSSSEMR
MSTRG.11231.1	nonsynonymous	c.G29A	p.S10N	homozygous	conservative	D[S-N]TADGTSQGDDVVSITDDVR
MSTRG.11231.2	nonsynonymous	c.G29A	p.S10N	homozygous	conservative	D[S-N]TADGTSQGDDVVSITDDVR
MSTRG.11231.3	nonsynonymous	c.G29A	p.S10N	homozygous	conservative	D[S-N]TADGTSQGDDVVSITDDVR
MSTRG.11251.1	nonsynonymous	c.G1418C	p.S473T	homozygous	conservative	D[S-T]DYTDADAALQLVLEAASHANEMMK
MSTRG.11251.2	nonsynonymous	c.G1415C	p.S472T	homozygous	conservative	D[S-T]DYTDADAALQLVLEAASHANEMMK
MSTRG.11251.3	nonsynonymous	c.G1448C	p.S483T	homozygous	conservative	D[S-T]DYTDADAALQLVLEAASHANEMMK
MSTRG.113.1	nonsynonymous	c.A503G	p.N168S	homozygous	conservative	EG[N-S]GSNLLVVPAGSALTEALISSAVCR
MSTRG.113.1	synonymous	c.A555G	p.L185L	homozygous	NA	EGSGSNLLVVPAGSALTEA[L-L]ISSAVCR
MSTRG.113.1	synonymous	c.T507C	p.G169G	homozygous	NA	EGS[G-G]SNLLVVPAGSALTEALISSAVCR
MSTRG.11320.1	nonsynonymous	c.G164C	p.S55T	homozygous	conservative	QSDQ[S-T]LSSEEHITLQDGGEIHSGSTPEGR
MSTRG.11320.1	nonsynonymous	c.T170C	p.F57S	homozygous	nonconservative	QSDQTL[F-S]SEEHITLQDGGEIHSGSTPEGR
MSTRG.11320.1	nonsynonymous	c.T90A	p.H30Q	homozygous	nonconservative	QLPIIEPVDNNQSVQ[H-Q]AHELVLR
MSTRG.11320.1	synonymous	c.C57T	p.I19I	homozygous	NA	QLPI[I-I]EPVDNNQSVQQAHELVLR
MSTRG.11320.2	nonsynonymous	c.G170C	p.S57T	homozygous	conservative	QSDQ[S-T]LSSEEHITLQDGGEIHSGSTPEGR
MSTRG.11320.2	nonsynonymous	c.T176C	p.F59S	homozygous	nonconservative	QSDQTL[F-S]SEEHITLQDGGEIHSGSTPEGR
MSTRG.11320.2	nonsynonymous	c.T90A	p.H30Q	homozygous	nonconservative	QLPIIEPVDNNQSVQ[H-Q]AHELVLR
MSTRG.11320.2	synonymous	c.C57T	p.I19I	homozygous	NA	QLPI[I-I]EPVDNNQSVQQAHELVLR
MSTRG.11322.1	nonsynonymous	c.A126T	p.Q42H	homozygous	nonconservative	[Q-H]IIHSANAPAALGPYSQAVR
MSTRG.11322.1	synonymous	c.C132T	p.I44I	homozygous	NA	HI[I-I]HSANAPAALGPYSQAVR
MSTRG.11327.1	nonsynonymous	c.A124G	p.K42E	homozygous	nonconservative	ELWD[K-E]VETSLFDCPVVGVHLMEGDEATK
MSTRG.11327.1	nonsynonymous	c.A431G	p.N144S	homozygous	conservative	APLVS[N-S]STSPSSSAGMSLEER
MSTRG.11327.1	nonsynonymous	c.A476G	p.K159R	homozygous	conservative	APLVSSSTSPSSSAGMSLEE[K-R]
MSTRG.11327.1	nonsynonymous	c.A848G	p.N283S	homozygous	conservative	LPNGE[N-S]IVEEFLSSDFLCTLK
MSTRG.11327.1	nonsynonymous	c.C425T	p.A142V	homozygous	conservative	APL[A-V]SSSTSPSSSAGMSLEER
MSTRG.11327.1	synonymous	c.A468G	p.L156L	homozygous	NA	APLVSSSTSPSSSAGMS[L-L]EER
MSTRG.11327.1	synonymous	c.C417G	p.A139A	homozygous	NA	[A-A]PLVSSSTSPSSSAGMSLEER
MSTRG.11327.1	synonymous	c.T117C	p.L39L	homozygous	NA	E[L-L]WDEVETSLFDCPVVGVHLMEGDEATK
MSTRG.11330.1	nonsynonymous	c.A2957C	p.N986T	homozygous	conservative	EVHNSPF[N-T]VLVAGEGAK
MSTRG.11330.2	nonsynonymous	c.A3437C	p.N1146T	homozygous	conservative	EVHNSPF[N-T]VLVAGEGAK
MSTRG.11335.1	nonsynonymous	c.A973G	p.I325V	homozygous	conservative	NSVMHNTSPSTPSLS[I-V]HPNYR
MSTRG.11335.1	nonsynonymous	c.C121G	p.H41D	homozygous	nonconservative	PANSEDFNGHSSL[H-D]GR
MSTRG.11335.1	nonsynonymous	c.C334G	p.P112A	homozygous	conservative	DVMDESNVT[P-A]CDDFDHSSIDQR
MSTRG.11335.1	nonsynonymous	c.C482A	p.S161Y	homozygous	conservative	L[S-Y]DEDHNCTEDDPSLSISYTSQIFEHR
MSTRG.11335.1	nonsynonymous	c.C548T	p.S183F	heterozygous	nonconservative	LYDEDHNCTEDDPSLSISYTSQI[S-F]EHR
MSTRG.11335.1	nonsynonymous	c.G2376T	p.E792D	homozygous	conservative	EEAQMTTSVVTNGHIA[E-D]QPTVK
MSTRG.11335.1	nonsynonymous	c.G317A	p.G106D	homozygous	nonconservative	DVM[G-D]ESNVTACDDFDHSSIDQR
MSTRG.11335.1	nonsynonymous	c.G540C	p.R180S	homozygous	nonconservative	LYDEDHNCTEDDPSLSISYT[R-S]QIFEHR
MSTRG.11335.1	nonsynonymous	c.G977A	p.R326H	homozygous	conservative	NSVMHNTSPSTPSLSV[R-H]PNYR
MSTRG.11335.1	synonymous	c.C351T	p.D117D	homozygous	NA	DVMDESNVTACDDF[D-D]HSSIDQR
MSTRG.11335.1	synonymous	c.C501T	p.C167C	homozygous	NA	LYDEDHN[C-C]TEDDPSLSISYTSQIFEHR
MSTRG.11335.1	synonymous	c.G2328A	p.E776E	homozygous	NA	[E-E]EAQMTTSVVTNGHIADQPTVK
MSTRG.11352.2	nonsynonymous	c.A238G	p.I80V	homozygous	conservative	DYRPQPELDVYSESGMDDASDLEELS[I-V]GAR
MSTRG.11352.2	nonsynonymous	c.T356C	p.V119A	homozygous	conservative	R[V-A]PVAGEAEEVPMEEEVPIDILENLR
MSTRG.11352.2	nonsynonymous	c.T381A	p.D127E	homozygous	conservative	RAPVAGEAE[D-E]VPMEEEVPIDILENLR
MSTRG.11352.2	synonymous	c.G198A	p.E66E	homozygous	NA	DYRPQPELDVYS[E-E]SGMDDASDLEELSVGAR
MSTRG.11362.1	nonsynonymous	c.A831C	p.K277N	homozygous	nonconservative	TYMAVDSADADVFF[K-N]EMYEK
MSTRG.11374.1	nonsynonymous	c.A941G	p.N314S	homozygous	conservative	GAAP[N-S]VAESPSDTLAADDPLAR
MSTRG.11389.1	nonsynonymous	c.A144G	p.I48M	homozygous	conservative	IRTSDGEQ[I-M]SVPETTTGETEEEMEK
MSTRG.11389.1	nonsynonymous	c.A144G	p.I48M	homozygous	conservative	TSDGEQ[I-M]SVPETTTGETEEEMEK
MSTRG.11389.1	nonsynonymous	c.G172A	p.A58T	homozygous	nonconservative	IRTSDGEQMSVPETTTGE[A-T]EEEMEK
MSTRG.11389.1	nonsynonymous	c.G172A	p.A58T	homozygous	nonconservative	TSDGEQMSVPETTTGE[A-T]EEEMEK
MSTRG.11389.1	nonsynonymous	c.T171A	p.D57E	homozygous	conservative	IRTSDGEQMSVPETTTG[D-E]TEEEMEK
MSTRG.11389.1	nonsynonymous	c.T171A	p.D57E	homozygous	conservative	TSDGEQMSVPETTTG[D-E]TEEEMEK
MSTRG.11389.1	synonymous	c.T147C	p.S49S	homozygous	NA	IRTSDGEQM[S-S]VPETTTGETEEEMEK
MSTRG.11389.1	synonymous	c.T147C	p.S49S	homozygous	NA	TSDGEQM[S-S]VPETTTGETEEEMEK
MSTRG.11397.1	nonsynonymous	c.A323T	p.E108V	homozygous	nonconservative	ESSTASENGNHET[E-V]ESDEASK
MSTRG.1146.1	nonsynonymous	c.G584A	p.S195N	homozygous	conservative	KLEGHQIVSGGENQILTLYEVES[S-N]AMIPK
MSTRG.115.1	nonsynonymous	c.A334G	p.S112G	homozygous	nonconservative	YAQSGVDLT[S-G]SESEGTNK
MSTRG.115.1	nonsynonymous	c.A613G	p.T205A	homozygous	nonconservative	[T-A]TSLNSSLASNHISLTNTGSSISGDSNIDAHSSSAHSQIR
MSTRG.115.1	nonsynonymous	c.C623T	p.S208L	homozygous	nonconservative	ATS[S-L]NSSLASNHISLTNTGSSISGDSNIDAHSSSAHSQIR
MSTRG.115.1	nonsynonymous	c.T647A	p.L216H	homozygous	nonconservative	ATSLNSSLASN[L-H]ISLTNTGSSISGDSNIDAHSSSAHSQIR
MSTRG.115.1	synonymous	c.A669T	p.G223G	homozygous	NA	ATSLNSSLASNHISLTNT[G-G]SSISGDSNIDAHSSSAHSQIR
MSTRG.11501.2	nonsynonymous	c.T630A	p.D210E	homozygous	conservative	NLAEVHWDPVDNTVLAAEQIDA[D-E]GR
MSTRG.11501.2	synonymous	c.A591G	p.V197V	homozygous	NA	NLAEVHWDP[V-V]DNTVLAAEQIDAEGR
MSTRG.11501.2	synonymous	c.A603G	p.V201V	homozygous	NA	NLAEVHWDPVDNT[V-V]LAAEQIDAEGR
MSTRG.11501.2	synonymous	c.G609C	p.A203A	homozygous	NA	NLAEVHWDPVDNTVL[A-A]AEQIDAEGR
MSTRG.11505.1	nonsynonymous	c.A535C	p.K179Q	homozygous	nonconservative	NHLL[K-Q]VGADSYLPTDQDDLPTGEIR
MSTRG.11505.1	nonsynonymous	c.C538G	p.L180V	homozygous	conservative	NHLLQ[L-V]GADSYLPTDQDDLPTGEIR
MSTRG.11505.1	synonymous	c.C558G	p.L186L	homozygous	NA	NHLLQVGADSY[L-L]PTDQDDLPTGEIR
MSTRG.11517.1	nonsynonymous	c.T140C	p.F47S	homozygous	nonconservative	[F-S]MQEVHLDSDFDTLDEPVWDTVK
MSTRG.11517.1	synonymous	c.G186A	p.E62E	homozygous	NA	SMQEVHLDSDFDTLD[E-E]PVWDTVK
MSTRG.11522.1	nonsynonymous	c.A292G	p.S98G	homozygous	nonconservative	QLHLAGNVI[S-G]VLPDEIGLLK
MSTRG.11539.1	nonsynonymous	c.T92C	p.V31A	homozygous	conservative	TGSALSITSHDEEE[V-A]K
MSTRG.11613.1	nonsynonymous	c.G1012A	p.A338T	homozygous	nonconservative	NFHFVHPSANADVVA[A-T]GTAR
MSTRG.11613.1	nonsynonymous	c.T255A	p.H85Q	homozygous	nonconservative	ITDDYALT[H-Q]VMPSDHGTVIAK
MSTRG.11613.1	synonymous	c.C1002T	p.D334D	homozygous	NA	NFHFVHPSANA[D-D]VVATGTAR
MSTRG.11614.1	nonsynonymous	c.T905A	p.V302D	homozygous	nonconservative	YEEVESTDANPSISLVM[V-D]AVK
MSTRG.11614.1	synonymous	c.G867A	p.E289E	homozygous	NA	YEEV[E-E]STDANPSISLVMDAVK
MSTRG.11616.1	nonsynonymous	c.G373A	p.V125I	homozygous	conservative	VSEAFV[V-I]GQTIHAVGMLTEK
MSTRG.1164.3	nonsynonymous	c.A1129G	p.K377E	homozygous	nonconservative	FGAHTAEEA[K-E]TDAFDNEAMK
MSTRG.1164.3	synonymous	c.G1110T	p.A370A	homozygous	NA	FG[A-A]HTAEEAETDAFDNEAMK
MSTRG.11663.1	nonsynonymous	c.C839T	p.A280V	homozygous	conservative	DPTS[A-V]GHIYEFVGPHCYQLSELIDYLYR
MSTRG.11663.1	synonymous	c.A903G	p.L301L	homozygous	NA	DPTSVGHIYEFVGPHCYQLSELIDY[L-L]YR
MSTRG.11663.1	synonymous	c.T849A	p.I283I	homozygous	NA	DPTSVGH[I-I]YEFVGPHCYQLSELIDYLYR
MSTRG.1167.1	nonsynonymous	c.G421A	p.G141S	homozygous	nonconservative	ANIATGAAYSGSTDG[G-S]TACQK
MSTRG.1167.1	synonymous	c.A396G	p.A132A	homozygous	NA	ANIATG[A-A]AYSGSTDGSTACQK
MSTRG.11694.1	nonsynonymous	c.C781T	p.L261F	homozygous	conservative	AV[L-F]ISGHDTNFLAIGR
MSTRG.11723.1	nonsynonymous	c.C3281G	p.A1094G	homozygous	conservative	SVG[A-G]PVLAACPVGDLFDNISK
MSTRG.11723.1	nonsynonymous	c.G2797A	p.A933T	homozygous	nonconservative	DNSFPLTYSEYEPSAVYDVF[A-T]EGK
MSTRG.11723.1	synonymous	c.C2796T	p.F932F	homozygous	NA	DNSFPLTYSEYEPSAVYDV[F-F]TEGK
MSTRG.11723.1	synonymous	c.C2805T	p.G935G	homozygous	NA	DNSFPLTYSEYEPSAVYDVFTE[G-G]K
MSTRG.11723.1	synonymous	c.C3294T	p.A1098A	homozygous	NA	SVGGPVL[A-A]ACPVGDLFDNISK
MSTRG.11723.1	synonymous	c.C3318T	p.F1106F	homozygous	NA	SVGGPVLAACPVGDL[F-F]DNISK
MSTRG.11723.2	nonsynonymous	c.C3281G	p.A1094G	homozygous	conservative	SVG[A-G]PVLAACPVGDLFDNISK
MSTRG.11723.2	nonsynonymous	c.G2797A	p.A933T	homozygous	nonconservative	DNSFPLTYSEYEPSAVYDVF[A-T]EGK
MSTRG.11723.2	synonymous	c.C2796T	p.F932F	homozygous	NA	DNSFPLTYSEYEPSAVYDV[F-F]TEGK
MSTRG.11723.2	synonymous	c.C2805T	p.G935G	homozygous	NA	DNSFPLTYSEYEPSAVYDVFTE[G-G]K
MSTRG.11723.2	synonymous	c.C3294T	p.A1098A	homozygous	NA	SVGGPVL[A-A]ACPVGDLFDNISK
MSTRG.11723.2	synonymous	c.C3318T	p.F1106F	homozygous	NA	SVGGPVLAACPVGDL[F-F]DNISK
MSTRG.11727.1	nonsynonymous	c.A168T	p.E56D	homozygous	conservative	DQAYDVAIELYTMAI[E-D]R
MSTRG.11739.1	nonsynonymous	c.A205G	p.T69A	homozygous	nonconservative	DD[T-A]ISEMATDSITTTVDAQMANLR
MSTRG.11739.1	nonsynonymous	c.A205G	p.T69A	homozygous	nonconservative	KRDD[T-A]ISEMATDSITTTVDAQMANLR
MSTRG.11739.1	nonsynonymous	c.A205G	p.T69A	homozygous	nonconservative	RDD[T-A]ISEMATDSITTTVDAQMANLR
MSTRG.11739.1	nonsynonymous	c.A258G	p.I86M	homozygous	conservative	DDAISEMATDSITTTVDAQ[I-M]ANLR
MSTRG.11739.1	nonsynonymous	c.A258G	p.I86M	homozygous	conservative	KRDDAISEMATDSITTTVDAQ[I-M]ANLR
MSTRG.11739.1	nonsynonymous	c.A258G	p.I86M	homozygous	conservative	RDDAISEMATDSITTTVDAQ[I-M]ANLR
MSTRG.11739.1	nonsynonymous	c.A352G	p.T118A	homozygous	nonconservative	E[T-A]IFAEVQNHCRPDALLITNTSSIR
MSTRG.11739.1	nonsynonymous	c.C218T	p.T73M	homozygous	nonconservative	DDAISE[T-M]ATDSITTTVDAQMANLR
MSTRG.11739.1	nonsynonymous	c.C218T	p.T73M	homozygous	nonconservative	KRDDAISE[T-M]ATDSITTTVDAQMANLR
MSTRG.11739.1	nonsynonymous	c.C218T	p.T73M	homozygous	nonconservative	RDDAISE[T-M]ATDSITTTVDAQMANLR
MSTRG.11739.1	synonymous	c.G270A	p.R90R	homozygous	NA	DDAISEMATDSITTTVDAQMANL[R-R]
MSTRG.11739.1	synonymous	c.G270A	p.R90R	homozygous	NA	KRDDAISEMATDSITTTVDAQMANL[R-R]
MSTRG.11739.1	synonymous	c.G270A	p.R90R	homozygous	NA	RDDAISEMATDSITTTVDAQMANL[R-R]
MSTRG.11739.2	nonsynonymous	c.A205G	p.T69A	homozygous	nonconservative	DD[T-A]ISEMATDSITTTVDAQMANLR
MSTRG.11739.2	nonsynonymous	c.A205G	p.T69A	homozygous	nonconservative	KRDD[T-A]ISEMATDSITTTVDAQMANLR
MSTRG.11739.2	nonsynonymous	c.A205G	p.T69A	homozygous	nonconservative	RDD[T-A]ISEMATDSITTTVDAQMANLR
MSTRG.11739.2	nonsynonymous	c.A258G	p.I86M	homozygous	conservative	DDAISEMATDSITTTVDAQ[I-M]ANLR
MSTRG.11739.2	nonsynonymous	c.A258G	p.I86M	homozygous	conservative	KRDDAISEMATDSITTTVDAQ[I-M]ANLR
MSTRG.11739.2	nonsynonymous	c.A258G	p.I86M	homozygous	conservative	RDDAISEMATDSITTTVDAQ[I-M]ANLR
MSTRG.11739.2	nonsynonymous	c.A352G	p.T118A	homozygous	nonconservative	E[T-A]IFAEVQNHCRPDALLITNTSSIR
MSTRG.11739.2	nonsynonymous	c.C218T	p.T73M	homozygous	nonconservative	DDAISE[T-M]ATDSITTTVDAQMANLR
MSTRG.11739.2	nonsynonymous	c.C218T	p.T73M	homozygous	nonconservative	KRDDAISE[T-M]ATDSITTTVDAQMANLR
MSTRG.11739.2	nonsynonymous	c.C218T	p.T73M	homozygous	nonconservative	RDDAISE[T-M]ATDSITTTVDAQMANLR
MSTRG.11739.2	synonymous	c.G270A	p.R90R	homozygous	NA	DDAISEMATDSITTTVDAQMANL[R-R]
MSTRG.11739.2	synonymous	c.G270A	p.R90R	homozygous	NA	KRDDAISEMATDSITTTVDAQMANL[R-R]
MSTRG.11739.2	synonymous	c.G270A	p.R90R	homozygous	NA	RDDAISEMATDSITTTVDAQMANL[R-R]
MSTRG.1178.2	nonsynonymous	c.G1199A	p.S400N	homozygous	conservative	IEELTDHLEDILGYAEIT[S-N]K
MSTRG.1178.2	synonymous	c.T1164C	p.H388H	homozygous	NA	IEELTD[H-H]LEDILGYAEITNK
MSTRG.11789.1	nonsynonymous	c.T536C	p.V179A	homozygous	conservative	LRPAGLSGAGYFGNQQGV[V-A]NNMGHPGAF
MSTRG.11789.1	synonymous	c.T555C	p.P185P	homozygous	NA	LRPAGLSGAGYFGNQQGVANNMGH[P-P]GAF
MSTRG.11789.2	nonsynonymous	c.T536C	p.V179A	homozygous	conservative	LRPAGLSGAGYFGNQQGV[V-A]NNMGHPGAF
MSTRG.11789.2	synonymous	c.T555C	p.P185P	homozygous	NA	LRPAGLSGAGYFGNQQGVANNMGH[P-P]GAF
MSTRG.11789.3	nonsynonymous	c.T536C	p.V179A	homozygous	conservative	LRPAGLSGAGYFGNQQGV[V-A]NNMGHPGAF
MSTRG.11789.3	synonymous	c.T555C	p.P185P	homozygous	NA	LRPAGLSGAGYFGNQQGVANNMGH[P-P]GAF
MSTRG.11791.1	nonsynonymous	c.G253C	p.V85L	homozygous	conservative	MLECTAPIN[V-L]CGDIHGQLSDLFR
MSTRG.11813.1	nonsynonymous	c.A698T	p.K233M	homozygous	nonconservative	EE[K-M]TVPDDSESTLHQGIGNADAK
MSTRG.11813.1	nonsynonymous	c.G719A	p.G240E	homozygous	nonconservative	EEMTVPDDS[G-E]STLHQGIGNADAK
MSTRG.11866.1	nonsynonymous	c.C1207A	p.L403M	homozygous	conservative	KTEHLLDD[L-M]LYYHER
MSTRG.11866.1	nonsynonymous	c.G680A	p.R227H	homozygous	conservative	VELLDSLMEIF[R-H]SFEHDSLSEK
MSTRG.11866.1	nonsynonymous	c.G689A	p.G230E	homozygous	nonconservative	VELLDSLMEIFHSF[G-E]HDSLSEK
MSTRG.11866.1	synonymous	c.T678C	p.F226F	homozygous	NA	VELLDSLMEI[F-F]HSFEHDSLSEK
MSTRG.11872.1	nonsynonymous	c.G501A	p.M167I	homozygous	conservative	HVVE[M-I]FDEAPALGTR
MSTRG.1188.1	nonsynonymous	c.G743A	p.G248D	homozygous	nonconservative	SELCQSVHME[G-D]VTSK
MSTRG.11892.1	nonsynonymous	c.T1532C	p.I511T	homozygous	nonconservative	IDLVWPPPEGETV[I-T]QGYQGPQHMPSVQWPPAESEQHER
MSTRG.11923.2	nonsynonymous	c.A375G	p.I125M	homozygous	conservative	S[I-M]AAGPGTSVYLGGSAGGAPLGAQSAYFAAPAAGGGGGAK
MSTRG.11923.2	nonsynonymous	c.C325T	p.L109F	homozygous	conservative	PGTSVMTAAAAPGGPAL[L-F]GGPIGAIPIAPAPK
MSTRG.11923.2	nonsynonymous	c.T405G	p.F135L	homozygous	conservative	SMAAGPGTSVY[F-L]GGSAGGAPLGAQSAYFAAPAAGGGGGAK
MSTRG.11923.3	nonsynonymous	c.A420G	p.I140M	homozygous	conservative	S[I-M]AAGPGTSVYLGGSAGGAPLGAQSAYFAAPAAGGGGGAK
MSTRG.11923.3	nonsynonymous	c.C370T	p.L124F	homozygous	conservative	PGTSVMTAAAAPGGPAL[L-F]GGPIGAIPIAPAPK
MSTRG.11923.3	nonsynonymous	c.T450G	p.F150L	homozygous	conservative	SMAAGPGTSVY[F-L]GGSAGGAPLGAQSAYFAAPAAGGGGGAK
MSTRG.11933.1	nonsynonymous	c.A623T	p.Y208F	heterozygous	nonconservative	NQINEASVILSMRPPTSLVWNSGNY[Y-F]QR
MSTRG.11933.1	nonsynonymous	c.A629G	p.H210R	homozygous	conservative	NQINEASVILSMRPPTSLVWNSGNYFQ[H-R]
MSTRG.11933.1	nonsynonymous	c.G571A	p.V191I	homozygous	conservative	NQINEASV[V-I]LSMRPPTSLVWNSGNYFQR
MSTRG.11955.1	nonsynonymous	c.G2695C	p.A899P	homozygous	conservative	K[A-P]GTWLVHAEIISGR
MSTRG.11955.1	nonsynonymous	c.G2722A	p.V908I	homozygous	conservative	KPGTWLVHAE[V-I]ISGR
MSTRG.11962.2	nonsynonymous	c.A2717T	p.H906L	homozygous	nonconservative	DSAIGIHQE[H-L]FGYDSTVDAK
MSTRG.11966.1	nonsynonymous	c.C1631T	p.A544V	homozygous	conservative	[A-V]VAAAVAPALLVDDEEK
MSTRG.11966.1	nonsynonymous	c.T1674A	p.D558E	homozygous	conservative	VVAAAVAPALLVDD[D-E]EK
MSTRG.1199.1	nonsynonymous	c.G1768A	p.V590I	homozygous	conservative	AGMAA[V-I]ALNDGIDVHTFLDEIAK
MSTRG.1202.3	nonsynonymous	c.C5944T	p.H1982Y	homozygous	nonconservative	[H-Y]LTESLAIMEYLEEAYPDR
MSTRG.1202.3	nonsynonymous	c.C5944T	p.H1982Y	homozygous	nonconservative	[H-Y]LTESLAIMEYLEEAYPDRFPLLPK
MSTRG.1202.3	synonymous	c.C5949T	p.L1983L	homozygous	NA	Y[L-L]TESLAIMEYLEEAYPDR
MSTRG.1202.3	synonymous	c.C5949T	p.L1983L	homozygous	NA	Y[L-L]TESLAIMEYLEEAYPDRFPLLPK
MSTRG.12063.2	nonsynonymous	c.T320G	p.V107G	homozygous	conservative	AFEEAVINSL[V-G]DLYTDYR
MSTRG.12063.2	nonsynonymous	c.T320G	p.V107G	homozygous	conservative	DAFEEAVINSL[V-G]DLYTDYR
MSTRG.12063.2	nonsynonymous	c.T320G	p.V107G	homozygous	conservative	DAFEEAVINSL[V-G]DLYTDYRTELK
MSTRG.12063.2	nonsynonymous	c.T320G	p.V107G	homozygous	conservative	TFGFAGKDAFEEAVINSL[V-G]DLYTDYR
MSTRG.12066.1	nonsynonymous	c.T1199C	p.M400T	homozygous	nonconservative	RELVEVADLLNDLDDLDGET[M-T]ELNLVQETK
MSTRG.12066.1	nonsynonymous	c.T1218G	p.H406Q	homozygous	nonconservative	RELVEVADLLNDLDDLDGETTELNLV[H-Q]ETK
MSTRG.12066.1	synonymous	c.T1165C	p.L389L	homozygous	NA	RELVEVADL[L-L]NDLDDLDGETTELNLVQETK
MSTRG.12077.1	nonsynonymous	c.A1772G	p.N591S	homozygous	conservative	FA[N-S]TCLPSPVYALTPLCHSHLSTCETK
MSTRG.12077.1	nonsynonymous	c.A1835G	p.Y612C	homozygous	conservative	FASTCLPSPVYALTPLCHSHLST[Y-C]ETK
MSTRG.12077.1	nonsynonymous	c.G1076A	p.S359N	homozygous	conservative	EEEINNLH[S-N]VIADLR
MSTRG.12077.1	nonsynonymous	c.G1831A	p.A611T	homozygous	nonconservative	FASTCLPSPVYALTPLCHSHLS[A-T]CETK
MSTRG.12077.1	nonsynonymous	c.T635C	p.V212A	homozygous	conservative	SH[V-A]QENEQSVKPLSESEDDRK
MSTRG.12077.1	synonymous	c.T1806G	p.T602T	homozygous	NA	FASTCLPSPVYAL[T-T]PLCHSHLSTCETK
MSTRG.12077.2	nonsynonymous	c.A1778G	p.N593S	homozygous	conservative	FA[N-S]TCLPSPVYALTPLCHSHLSTCETK
MSTRG.12077.2	nonsynonymous	c.A1841G	p.Y614C	homozygous	conservative	FASTCLPSPVYALTPLCHSHLST[Y-C]ETK
MSTRG.12077.2	nonsynonymous	c.G1076A	p.S359N	homozygous	conservative	EEEINNLH[S-N]VIADLR
MSTRG.12077.2	nonsynonymous	c.G1837A	p.A613T	homozygous	nonconservative	FASTCLPSPVYALTPLCHSHLS[A-T]CETK
MSTRG.12077.2	nonsynonymous	c.T635C	p.V212A	homozygous	conservative	SH[V-A]QENEQSVKPLSESEDDRK
MSTRG.12077.2	synonymous	c.T1812G	p.T604T	homozygous	NA	FASTCLPSPVYAL[T-T]PLCHSHLSTCETK
MSTRG.12125.1	nonsynonymous	c.G343A	p.V115I	homozygous	conservative	HHATYVNNLN[V-I]CEEK
MSTRG.1214.2	nonsynonymous	c.C3062T	p.P1021L	homozygous	conservative	GPVALASAC[P-L]FDQAAILLENR
MSTRG.12155.1	nonsynonymous	c.C628T	p.H210Y	heterozygous	nonconservative	TMAGFEA[H-Y]DVTMTDLLSGHSLDQYR
MSTRG.12155.1	synonymous	c.A681G	p.R227R	homozygous	NA	TMAGFEAYDVTMTDLLSGHSLDQY[R-R]
MSTRG.12169.1	nonsynonymous	c.G125C	p.G42A	homozygous	conservative	STAANVPVQVAGIANSE[G-A]R
MSTRG.12169.1	nonsynonymous	c.G127A	p.G43R	homozygous	nonconservative	STAANVPVQVAGIANSEA[G-R]
MSTRG.12217.1	nonsynonymous	c.A291C	p.E97D	homozygous	conservative	AI[E-D]QPLQPLAAAEQSIAMVSLITHK
MSTRG.12221.1	nonsynonymous	c.G571A	p.V191I	homozygous	conservative	LSQ[V-I]NTLQQLENIASHGFIAEHLEK
MSTRG.12280.1	nonsynonymous	c.A165G	p.I55M	homozygous	conservative	SCINENLYME[I-M]ADALVR
MSTRG.12285.1	nonsynonymous	c.A449G	p.H150R	homozygous	conservative	TPTDYQAPGFYPSSEDPVLLQDAQ[H-R]
MSTRG.12285.1	nonsynonymous	c.T424C	p.S142P	homozygous	nonconservative	TPTDYQAPGFYPSSED[S-P]VLLQDAQR
MSTRG.12285.2	nonsynonymous	c.A632G	p.H211R	homozygous	conservative	TPTDYQAPGFYPSSEDPVLLQDAQ[H-R]
MSTRG.12285.2	nonsynonymous	c.T607C	p.S203P	homozygous	nonconservative	TPTDYQAPGFYPSSED[S-P]VLLQDAQR
MSTRG.12301.1	nonsynonymous	c.G100A	p.A34T	homozygous	nonconservative	[A-T]TDALESSIVVDDADTSPAMHDAIIVER
MSTRG.12301.1	synonymous	c.C108T	p.D36D	homozygous	NA	TT[D-D]ALESSIVVDDADTSPAMHDAIIVER
MSTRG.12301.1	synonymous	c.C120T	p.S40S	homozygous	NA	TTDALE[S-S]SIVVDDADTSPAMHDAIIVER
MSTRG.12301.1	synonymous	c.T111C	p.A37A	homozygous	NA	TTD[A-A]LESSIVVDDADTSPAMHDAIIVER
MSTRG.12304.1	synonymous	c.A1437G	p.E479E	homozygous	NA	DPSLLDMW[E-E]EASHQIIYQSFDR
MSTRG.12304.1	synonymous	c.A1467G	p.S489S	homozygous	NA	DPSLLDMWEEASHQIIYQ[S-S]FDR
MSTRG.12304.1	synonymous	c.T1461C	p.Y487Y	homozygous	NA	DPSLLDMWEEASHQII[Y-Y]QSFDR
MSTRG.12355.1	nonsynonymous	c.A1743C	p.Q581H	homozygous	nonconservative	IM[Q-H]TLPQQPVVAQIVSTMER
MSTRG.12355.1	nonsynonymous	c.A1743C	p.Q581H	homozygous	nonconservative	IM[Q-H]TLPQQPVVAQIVSTMERDSNQQVSAFTYDLLNSFAK
MSTRG.12355.1	nonsynonymous	c.A2479G	p.M827V	homozygous	conservative	N[M-V]PTTLGLCLTLSDMQPTIGYAEGDLTMEK
MSTRG.12355.1	nonsynonymous	c.A2594G	p.N865S	homozygous	conservative	L[N-S]TSPSFASTQISEMKLWNPIFEQGVK
MSTRG.12355.1	nonsynonymous	c.A4180G	p.R1394G	homozygous	nonconservative	IFVDNEEVD[R-G]DTVQSYNIEK
MSTRG.12355.1	nonsynonymous	c.A4180G	p.R1394G	homozygous	nonconservative	IFVDNEEVD[R-G]DTVQSYNIEKIEDNMVR
MSTRG.12355.1	nonsynonymous	c.C4765T	p.P1589S	homozygous	nonconservative	TSVLDLNDY[P-S]VSFVENIR
MSTRG.12355.1	nonsynonymous	c.G1813T	p.A605S	homozygous	nonconservative	DSNQQV[A-S]AFTYDLLNSFAK
MSTRG.12355.1	nonsynonymous	c.G1813T	p.A605S	homozygous	nonconservative	IMHTLPQQPVVAQIVSTMERDSNQQV[A-S]AFTYDLLNSFAK
MSTRG.12355.1	nonsynonymous	c.G1813T	p.A605S	homozygous	nonconservative	SNQQV[A-S]AFTYDLLNSFAK
MSTRG.12355.1	nonsynonymous	c.G4195A	p.G1399S	homozygous	nonconservative	IFVDNEEVDGDTVQ[G-S]YNIEK
MSTRG.12355.1	nonsynonymous	c.G4195A	p.G1399S	homozygous	nonconservative	IFVDNEEVDGDTVQ[G-S]YNIEKIEDNMVR
MSTRG.12355.1	nonsynonymous	c.G4760A	p.G1587D	homozygous	nonconservative	TSVLDLN[G-D]YSVSFVENIR
MSTRG.12355.1	nonsynonymous	c.T1357A	p.S453T	homozygous	conservative	RSPAVHQ[S-T]TWLAIGSVMR
MSTRG.12355.1	nonsynonymous	c.T1357A	p.S453T	homozygous	conservative	SPAVHQ[S-T]TWLAIGSVMR
MSTRG.12355.1	nonsynonymous	c.T1847C	p.V616A	homozygous	conservative	DSNQQVSAFTYDLLNSF[V-A]K
MSTRG.12355.1	nonsynonymous	c.T1847C	p.V616A	homozygous	conservative	IMHTLPQQPVVAQIVSTMERDSNQQVSAFTYDLLNSF[V-A]K
MSTRG.12355.1	nonsynonymous	c.T1847C	p.V616A	homozygous	conservative	SNQQVSAFTYDLLNSF[V-A]K
MSTRG.12355.1	synonymous	c.A4782G	p.E1594E	homozygous	NA	TSVLDLNDYSVSFV[E-E]NIR
MSTRG.12355.1	synonymous	c.C1842G	p.S614S	homozygous	NA	DSNQQVSAFTYDLLN[S-S]FAK
MSTRG.12355.1	synonymous	c.C1842G	p.S614S	homozygous	NA	IMHTLPQQPVVAQIVSTMERDSNQQVSAFTYDLLN[S-S]FAK
MSTRG.12355.1	synonymous	c.C1842G	p.S614S	homozygous	NA	SNQQVSAFTYDLLN[S-S]FAK
MSTRG.12355.1	synonymous	c.C4740G	p.T1580T	homozygous	NA	[T-T]SVLDLNDYSVSFVENIR
MSTRG.12355.1	synonymous	c.T4776C	p.F1592F	homozygous	NA	TSVLDLNDYSVS[F-F]VENIR
MSTRG.12361.1	nonsynonymous	c.G357C	p.E119D	homozygous	conservative	ELDAD[E-D]SVGAIILTGNQK
MSTRG.12361.1	synonymous	c.A390G	p.Q130Q	homozygous	NA	ELDADDSVGAIILTGN[Q-Q]K
MSTRG.12371.1	nonsynonymous	c.A241G	p.I81V	homozygous	conservative	FGELSYDHL[I-V]VFAPSVEEFGGSITVDEITR
MSTRG.12371.1	nonsynonymous	c.G813T	p.Q271H	homozygous	nonconservative	AV[Q-H]SGNLELVTALSK
MSTRG.12371.1	synonymous	c.A261G	p.V87V	homozygous	NA	FGELSYDHLVVFAPS[V-V]EEFGGSITVDEITR
MSTRG.12371.1	synonymous	c.C282T	p.I94I	homozygous	NA	FGELSYDHLVVFAPSVEEFGGS[I-I]TVDEITR
MSTRG.12371.1	synonymous	c.G252T	p.A84A	homozygous	NA	FGELSYDHLVVF[A-A]PSVEEFGGSITVDEITR
MSTRG.12372.1	nonsynonymous	c.G772A	p.D258N	homozygous	nonconservative	LENLEALTNLEEIYLSDQGIE[D-N]ISHLALLK
MSTRG.12372.1	nonsynonymous	c.G775A	p.V259I	homozygous	conservative	LENLEALTNLEEIYLSDQGIEN[V-I]SHLALLK
MSTRG.1247.1	nonsynonymous	c.A5773T	p.T1925S	homozygous	conservative	IAG[T-S]DNLQVGETGDEVEAEHGR
MSTRG.1247.1	nonsynonymous	c.G500A	p.R167H	homozygous	conservative	[R-H]RPFVAGVSLER
MSTRG.1247.1	synonymous	c.G5769C	p.A1923A	homozygous	NA	I[A-A]GSDNLQVGETGDEVEAEHGR
MSTRG.1247.2	nonsynonymous	c.A5773T	p.T1925S	homozygous	conservative	IAG[T-S]DNLQVGETGDEVEAEHGR
MSTRG.1247.2	nonsynonymous	c.G500A	p.R167H	homozygous	conservative	[R-H]RPFVAGVSLER
MSTRG.1247.2	synonymous	c.G5769C	p.A1923A	homozygous	NA	I[A-A]GSDNLQVGETGDEVEAEHGR
MSTRG.12475.1	nonsynonymous	c.A1559G	p.D520G	homozygous	nonconservative	NVVNVLHQWA[D-G]QVGALDVGYK
MSTRG.12475.1	nonsynonymous	c.T121C	p.F41L	homozygous	conservative	I[F-L]VDPGLTILQACALVGVDIPR
MSTRG.12475.1	synonymous	c.A1590G	p.K530K	homozygous	NA	NVVNVLHQWAGQVGALDVGY[K-K]
MSTRG.12487.1	nonsynonymous	c.A362G	p.N121S	homozygous	conservative	FFNANYV[N-S]DGEEYDAVAAR
MSTRG.12540.1	nonsynonymous	c.A781T	p.T261S	homozygous	conservative	DPVQGGDIHAITIP[T-S]R
MSTRG.12540.1	nonsynonymous	c.G775A	p.V259I	homozygous	conservative	DPVQGGDIHAIT[V-I]PSR
MSTRG.12540.1	nonsynonymous	c.T538C	p.Y180H	homozygous	nonconservative	TNIFGPLGDGF[Y-H]YR
MSTRG.12546.1	nonsynonymous	c.C660G	p.D220E	homozygous	conservative	AV[D-E]SNVGQTQSNQLGSHER
MSTRG.12546.1	synonymous	c.T654C	p.A218A	homozygous	NA	[A-A]VESNVGQTQSNQLGSHER
MSTRG.12546.2	nonsynonymous	c.C681G	p.D227E	homozygous	conservative	AV[D-E]SNVGQTQSNQLGSHER
MSTRG.12546.2	synonymous	c.T675C	p.A225A	homozygous	NA	[A-A]VESNVGQTQSNQLGSHER
MSTRG.12595.1	nonsynonymous	c.C114A	p.F38L	homozygous	conservative	V[F-L]IAEVPTIAIDWVQIESNTSVLHDEFIAHR
MSTRG.12604.1	nonsynonymous	c.T592A	p.F198I	homozygous	conservative	MLN[F-I]PAGVPITVNVINHQNEVGLR
MSTRG.12604.1	synonymous	c.C597T	p.P199P	homozygous	NA	MLNI[P-P]AGVPITVNVINHQNEVGLR
MSTRG.12611.3	nonsynonymous	c.A834C	p.E278D	homozygous	conservative	SEYCEASGNGGALPTTSATDMQGV[E-D]R
MSTRG.12611.3	nonsynonymous	c.T1124C	p.L375P	heterozygous	conservative	ISDG[L-P]GIENVTINPAVNIHEVIFR
MSTRG.12611.3	nonsynonymous	c.T1124C	p.L375P	heterozygous	conservative	ISDG[L-P]GIENVTINPAVNIHEVIFRPLDR
MSTRG.12611.3	nonsynonymous	c.T217G	p.C73G	homozygous	nonconservative	AVCNSIMLTVPLVTTF[C-G]YPK
MSTRG.12611.3	synonymous	c.C207T	p.V69V	homozygous	NA	AVCNSIMLTVPL[V-V]TTFGYPK
MSTRG.12611.3	synonymous	c.T177C	p.C59C	homozygous	NA	AV[C-C]NSIMLTVPLVTTFGYPK
MSTRG.12611.3	synonymous	c.T786C	p.N262N	homozygous	NA	SEYCEASG[N-N]GGALPTTSATDMQGVDR
MSTRG.12611.3	synonymous	c.T804C	p.T268T	homozygous	NA	SEYCEASGNGGALP[T-T]TSATDMQGVDR
MSTRG.12611.5	nonsynonymous	c.A441C	p.E147D	homozygous	conservative	SEYCEASGNGGALPTTSATDMQGV[E-D]R
MSTRG.12611.5	nonsynonymous	c.T500C	p.L167P	heterozygous	conservative	ISDG[L-P]GIENVTINPAVNIHEVIFR
MSTRG.12611.5	nonsynonymous	c.T500C	p.L167P	heterozygous	conservative	ISDG[L-P]GIENVTINPAVNIHEVIFRPLDR
MSTRG.12611.5	synonymous	c.T393C	p.N131N	homozygous	NA	SEYCEASG[N-N]GGALPTTSATDMQGVDR
MSTRG.12611.5	synonymous	c.T411C	p.T137T	homozygous	NA	SEYCEASGNGGALP[T-T]TSATDMQGVDR
MSTRG.1264.2	nonsynonymous	c.C972A	p.D324E	homozygous	conservative	PIIVNEDGTTSQV[D-E]EDSQIER
MSTRG.1264.2	nonsynonymous	c.G1759A	p.V587I	homozygous	conservative	A[V-I]RPSNHEILVDATDFK
MSTRG.1264.2	synonymous	c.C951T	p.D317D	homozygous	NA	PIIVNE[D-D]GTTSQVEEDSQIER
MSTRG.1264.2	synonymous	c.C957T	p.T319T	homozygous	NA	PIIVNEDG[T-T]TSQVEEDSQIER
MSTRG.12652.1	nonsynonymous	c.C367G	p.L123V	homozygous	conservative	IYLGGTNPDNAEN[L-V]TESGVAAGWLEVR
MSTRG.12652.1	nonsynonymous	c.C367G	p.L123V	homozygous	conservative	IYLGGTNPDNAEN[L-V]TESGVAAGWLEVRPGR
MSTRG.12652.1	synonymous	c.A417G	p.R139R	homozygous	NA	IYLGGTNPDNAENVTESGVAAGWLEVRPG[R-R]
MSTRG.12659.1	nonsynonymous	c.G37T	p.V13L	homozygous	conservative	NFN[V-L]AGFTLPTAMVFSTTASVPVR
MSTRG.12659.1	synonymous	c.C75G	p.S25S	heterozygous	NA	NFNLAGFTLPTAMVF[S-S]TTASVPVR
MSTRG.12659.1	synonymous	c.T93C	p.P31P	homozygous	NA	NFNLAGFTLPTAMVFSTTASV[P-P]VR
MSTRG.1266.1	nonsynonymous	c.A1712G	p.H571R	homozygous	conservative	NAYGGFSSTQDTVIALQALGSYAE[H-R]
MSTRG.1266.1	synonymous	c.C1704T	p.Y568Y	homozygous	NA	NAYGGFSSTQDTVIALQALGS[Y-Y]AER
MSTRG.1266.1	synonymous	c.G1710A	p.E570E	homozygous	NA	NAYGGFSSTQDTVIALQALGSYA[E-E]R
MSTRG.1266.2	nonsynonymous	c.A1883G	p.H628R	homozygous	conservative	NAYGGFSSTQDTVIALQALGSYAE[H-R]
MSTRG.1266.2	synonymous	c.C1875T	p.Y625Y	homozygous	NA	NAYGGFSSTQDTVIALQALGS[Y-Y]AER
MSTRG.1266.2	synonymous	c.G1881A	p.E627E	homozygous	NA	NAYGGFSSTQDTVIALQALGSYA[E-E]R
MSTRG.1266.3	nonsynonymous	c.A2018G	p.H673R	homozygous	conservative	NAYGGFSSTQDTVIALQALGSYAE[H-R]
MSTRG.1266.3	synonymous	c.C2010T	p.Y670Y	homozygous	NA	NAYGGFSSTQDTVIALQALGS[Y-Y]AER
MSTRG.1266.3	synonymous	c.G2016A	p.E672E	homozygous	NA	NAYGGFSSTQDTVIALQALGSYA[E-E]R
MSTRG.1266.4	nonsynonymous	c.A1664G	p.H555R	homozygous	conservative	NAYGGFSSTQDTVIALQALGSYAE[H-R]
MSTRG.1266.4	synonymous	c.C1656T	p.Y552Y	homozygous	NA	NAYGGFSSTQDTVIALQALGS[Y-Y]AER
MSTRG.1266.4	synonymous	c.G1662A	p.E554E	homozygous	NA	NAYGGFSSTQDTVIALQALGSYA[E-E]R
MSTRG.12741.1	nonsynonymous	c.A128C	p.E43A	homozygous	nonconservative	STAANVPVQVAGIANSE[E-A]R
MSTRG.12741.1	nonsynonymous	c.C106G	p.P36A	homozygous	conservative	STAANVPVQV[P-A]GIANSEAR
MSTRG.12774.1	nonsynonymous	c.A312T	p.E104D	homozygous	conservative	KVD[E-D]LLEQCGAMEK
MSTRG.12774.1	nonsynonymous	c.A336G	p.I112M	homozygous	conservative	KVDDLLEQCGA[I-M]EK
MSTRG.12774.1	nonsynonymous	c.C324A	p.H108Q	homozygous	nonconservative	KVDDLLE[H-Q]CGAMEK
MSTRG.12785.1	nonsynonymous	c.A1262G	p.Q421R	homozygous	nonconservative	NV[Q-R]DEMTIAQEEIFGPVMSVLR
MSTRG.12785.1	synonymous	c.C1275T	p.T425T	homozygous	NA	NVRDEM[T-T]IAQEEIFGPVMSVLR
MSTRG.12804.1	nonsynonymous	c.G209A	p.S70N	homozygous	conservative	PALSLSGN[S-N]NVASENIEGLAK
MSTRG.12804.1	synonymous	c.C213T	p.N71N	homozygous	NA	PALSLSGNN[N-N]VASENIEGLAK
MSTRG.12816.1	nonsynonymous	c.T293A	p.V98E	homozygous	nonconservative	TFADAFVQ[V-E]HADQLTAYR
MSTRG.12816.1	nonsynonymous	c.T293A	p.V98E	homozygous	nonconservative	WLAYTFADAFVQ[V-E]HADQLTAYR
MSTRG.12816.1	synonymous	c.A309G	p.L103L	homozygous	NA	TFADAFVQEHADQ[L-L]TAYR
MSTRG.12816.1	synonymous	c.A309G	p.L103L	homozygous	NA	WLAYTFADAFVQEHADQ[L-L]TAYR
MSTRG.1289.1	nonsynonymous	c.C737G	p.A246G	homozygous	conservative	FIFGDDISSVDCTLFGQLATVLYVPTNSY[A-G]K
MSTRG.12911.1	nonsynonymous	c.C581T	p.T194M	homozygous	nonconservative	FGAFGFQEALENE[T-M]HFHGR
MSTRG.12911.1	synonymous	c.A564G	p.E188E	homozygous	NA	FGAFGFQ[E-E]ALENEMHFHGR
MSTRG.1295.1	nonsynonymous	c.C1379T	p.S460L	homozygous	nonconservative	GPEVH[S-L]GSIGAMANFK
MSTRG.1295.2	nonsynonymous	c.C1388T	p.S463L	homozygous	nonconservative	GPEVH[S-L]GSIGAMANFK
MSTRG.12980.1	nonsynonymous	c.T308C	p.V103A	homozygous	conservative	SGQEDDSD[V-A]ASPPTQAAPR
MSTRG.1319.1	nonsynonymous	c.A494T	p.D165V	homozygous	nonconservative	QSEPVVSPANVH[D-V]QTTSPTSLSSSEQVGK
MSTRG.1319.1	nonsynonymous	c.G508C	p.A170P	homozygous	conservative	QSEPVVSPANVHVQTTS[A-P]TSLSSSEQVGK
MSTRG.133.1	nonsynonymous	c.A391G	p.T131A	homozygous	nonconservative	EE[T-A]EVLEGEVVSIEMDRPATGVGPK
MSTRG.133.1	synonymous	c.A387G	p.E129E	homozygous	NA	[E-E]EAEVLEGEVVSIEMDRPATGVGPK
MSTRG.133.1	synonymous	c.G435A	p.R145R	homozygous	NA	EEAEVLEGEVVSIEMD[R-R]PATGVGPK
MSTRG.134.1	nonsynonymous	c.A395C	p.H132P	homozygous	nonconservative	EVDLFQIDNTLS[H-P]EHSCSIQVNPPTAYR
MSTRG.134.1	nonsynonymous	c.G208A	p.V70I	homozygous	conservative	WLGAPINPADLNMIQGVYA[V-I]K
MSTRG.134.1	nonsynonymous	c.T961C	p.F321L	homozygous	conservative	[F-L]EDHTEALEAAAVDFTK
MSTRG.134.1	nonsynonymous	c.T961C	p.F321L	homozygous	conservative	R[F-L]EDHTEALEAAAVDFTK
MSTRG.134.1	synonymous	c.G390A	p.L130L	homozygous	NA	EVDLFQIDNT[L-L]SPEHSCSIQVNPPTAYR
MSTRG.1351.1	nonsynonymous	c.A229G	p.I77V	homozygous	conservative	IPSIDEVQLDVAQCWNNG[I-V]DR
MSTRG.1351.1	synonymous	c.A213G	p.Q71Q	homozygous	NA	IPSIDEVQLDVA[Q-Q]CWNNGVDR
MSTRG.1351.1	synonymous	c.C207T	p.V69V	homozygous	NA	IPSIDEVQLD[V-V]AQCWNNGVDR
MSTRG.1351.1	synonymous	c.C210G	p.A70A	homozygous	NA	IPSIDEVQLDV[A-A]QCWNNGVDR
MSTRG.1377.1	nonsynonymous	c.A691G	p.N231D	homozygous	nonconservative	SPTNTYVVQ[N-D]VDSAAIDVGK
MSTRG.1377.1	nonsynonymous	c.A697G	p.N233D	homozygous	nonconservative	SPTNTYVVQDV[N-D]SAAIDVGK
MSTRG.1377.1	nonsynonymous	c.G323A	p.C108Y	homozygous	conservative	HTEDMDQRPLASVVPPSEAYSTSQD[C-Y]HQSYEAVPK
MSTRG.1377.1	nonsynonymous	c.T292C	p.S98P	homozygous	nonconservative	HTEDMDQRPLASVVP[S-P]SEAYSTSQDYHQSYEAVPK
MSTRG.1377.2	nonsynonymous	c.A691G	p.N231D	homozygous	nonconservative	SPTNTYVVQ[N-D]VDSAAIDVGK
MSTRG.1377.2	nonsynonymous	c.A697G	p.N233D	homozygous	nonconservative	SPTNTYVVQDV[N-D]SAAIDVGK
MSTRG.1377.2	nonsynonymous	c.G323A	p.C108Y	homozygous	conservative	HTEDMDQRPLASVVPPSEAYSTSQD[C-Y]HQSYEAVPK
MSTRG.1377.2	nonsynonymous	c.T292C	p.S98P	homozygous	nonconservative	HTEDMDQRPLASVVP[S-P]SEAYSTSQDYHQSYEAVPK
MSTRG.1378.1	nonsynonymous	c.G576C	p.E192D	homozygous	conservative	NN[E-D]VGMNQAQPQHNELLPTNPAEEFR
MSTRG.1378.1	nonsynonymous	c.G586A	p.D196N	homozygous	nonconservative	NNDVGM[D-N]QAQPQHNELLPTNPAEEFR
MSTRG.1378.1	nonsynonymous	c.T645G	p.S215R	homozygous	nonconservative	NNDVGMNQAQPQHNELLPTNPAEEF[S-R]
MSTRG.1378.1	synonymous	c.A615G	p.L205L	homozygous	NA	NNDVGMNQAQPQHNE[L-L]LPTNPAEEFR
MSTRG.1402.2	nonsynonymous	c.A94G	p.T32A	homozygous	nonconservative	KPCHDLL[T-A]CLIEK
MSTRG.1433.1	nonsynonymous	c.A1702G	p.N568D	homozygous	nonconservative	RLDGEP[N-D]LGIETPIGIVPK
MSTRG.1433.1	synonymous	c.C1686A	p.R562R	homozygous	NA	[R-R]LDGEPDLGIETPIGIVPK
MSTRG.145.1	nonsynonymous	c.T285G	p.D95E	homozygous	conservative	AGLPVDSMIESIVPHL[D-E]SGDIIIDGGNSEYTDTNR
MSTRG.145.1	nonsynonymous	c.T285G	p.D95E	homozygous	conservative	AGLPVDSMIESIVPHL[D-E]SGDIIIDGGNSEYTDTNRR
MSTRG.145.1	nonsynonymous	c.T458C	p.L153P	homozygous	conservative	HGPSLMPGGNPHAW[L-P]HLK
MSTRG.145.1	synonymous	c.G273T	p.V91V	homozygous	NA	AGLPVDSMIESI[V-V]PHLESGDIIIDGGNSEYTDTNR
MSTRG.145.1	synonymous	c.G273T	p.V91V	homozygous	NA	AGLPVDSMIESI[V-V]PHLESGDIIIDGGNSEYTDTNRR
MSTRG.1451.2	nonsynonymous	c.G1344C	p.M448I	homozygous	conservative	QDGADRPTFETIANIIESQ[M-I]EDYNETVEPFWK
MSTRG.1451.2	synonymous	c.C1293T	p.G431G	homozygous	NA	QD[G-G]ADRPTFETIANIIESQIEDYNETVEPFWK
MSTRG.1451.2	synonymous	c.G1305A	p.P435P	homozygous	NA	QDGADR[P-P]TFETIANIIESQIEDYNETVEPFWK
MSTRG.1451.2	synonymous	c.G1365A	p.V455V	homozygous	NA	QDGADRPTFETIANIIESQIEDYNET[V-V]EPFWK
MSTRG.1464.1	nonsynonymous	c.G841T	p.A281S	homozygous	nonconservative	APAFGSVPITDPY[A-S]GGYTASPWAADTR
MSTRG.1485.1	nonsynonymous	c.G1068C	p.M356I	homozygous	conservative	STIPHYYLTSEIN[M-I]DALLK
MSTRG.1485.1	synonymous	c.A1074G	p.A358A	homozygous	NA	STIPHYYLTSEINID[A-A]LLK
MSTRG.1485.1	synonymous	c.G1059A	p.E353E	homozygous	NA	STIPHYYLTS[E-E]INIDALLK
MSTRG.1509.1	nonsynonymous	c.T314C	p.V105A	homozygous	conservative	IFISGP[V-A]GVISPWHDVPLFADEANK
MSTRG.1509.1	synonymous	c.C309A	p.G103G	homozygous	NA	IFIS[G-G]PAGVISPWHDVPLFADEANK
MSTRG.1509.2	nonsynonymous	c.T170C	p.V57A	homozygous	conservative	IFISGP[V-A]GVISPWHDVPLFADEANK
MSTRG.1509.2	synonymous	c.C165A	p.G55G	homozygous	NA	IFIS[G-G]PAGVISPWHDVPLFADEANK
MSTRG.1524.1	nonsynonymous	c.G124A	p.A42T	homozygous	nonconservative	AELHQQGETNSA[A-T]ANDER
MSTRG.1524.2	nonsynonymous	c.G124A	p.A42T	homozygous	nonconservative	AELHQQGETNSA[A-T]ANDER
MSTRG.1529.1	nonsynonymous	c.A1423G	p.S475G	homozygous	nonconservative	GGDTPYEGVFMLPNE[S-G]ESLPLAVVPHGGPHGVSVAGWPSR
MSTRG.1529.1	nonsynonymous	c.A1432C	p.I478L	homozygous	conservative	GGDTPYEGVFMLPNEGES[I-L]PLAVVPHGGPHGVSVAGWPSR
MSTRG.1529.1	nonsynonymous	c.T1442C	p.V481A	homozygous	conservative	GGDTPYEGVFMLPNEGESLPL[V-A]VVPHGGPHGVSVAGWPSR
MSTRG.1529.1	synonymous	c.C1473T	p.V491V	homozygous	NA	GGDTPYEGVFMLPNEGESLPLAVVPHGGPHG[V-V]SVAGWPSR
MSTRG.1529.1	synonymous	c.G1401A	p.G467G	homozygous	NA	GGDTPYE[G-G]VFMLPNEGESLPLAVVPHGGPHGVSVAGWPSR
MSTRG.1531.1	nonsynonymous	c.G1549T	p.A517S	homozygous	nonconservative	SLAELGLAPAVVLHLDFDEPIDGPSL[A-S]QK
MSTRG.1534.4	nonsynonymous	c.A1475G	p.E492G	homozygous	nonconservative	AVELSQSAEEVFTDTSTYL[E-G]GK
MSTRG.1534.4	nonsynonymous	c.A556G	p.S186G	homozygous	nonconservative	TS[S-G]AVSAIGGVLSETK
MSTRG.1534.4	nonsynonymous	c.A876T	p.Q292H	homozygous	nonconservative	VV[Q-H]GSDSVTAAVEDAFSSVK
MSTRG.1534.4	nonsynonymous	c.C1421T	p.A474V	homozygous	conservative	A[A-V]ELSQSAEEVFTDTSTYLGGK
MSTRG.1534.4	nonsynonymous	c.C1480A	p.Q494K	homozygous	nonconservative	AVELSQSAEEVFTDTSTYLGG[Q-K]
MSTRG.1534.4	nonsynonymous	c.C1668G	p.F556L	homozygous	conservative	HSFEE[F-L]VSSTYDK
MSTRG.1534.4	nonsynonymous	c.C890T	p.A297V	homozygous	conservative	VVHGSDS[A-V]TAAVEDAFSSVK
MSTRG.1534.4	nonsynonymous	c.G748A	p.V250I	homozygous	conservative	VEAG[V-I]VEALQHGADEAEK
MSTRG.1534.4	nonsynonymous	c.G880T	p.A294S	homozygous	nonconservative	VVHG[A-S]DSVTAAVEDAFSSVK
MSTRG.1534.4	synonymous	c.C567T	p.S189S	homozygous	NA	TSGAV[S-S]AIGGVLSETK
MSTRG.1534.5	nonsynonymous	c.A1475G	p.E492G	homozygous	nonconservative	AVELSQSAEEVFTDTSTYL[E-G]GK
MSTRG.1534.5	nonsynonymous	c.A556G	p.S186G	homozygous	nonconservative	TS[S-G]AVSAIGGVLSETK
MSTRG.1534.5	nonsynonymous	c.A876T	p.Q292H	homozygous	nonconservative	VV[Q-H]GSDSVTAAVEDAFSSVK
MSTRG.1534.5	nonsynonymous	c.C1421T	p.A474V	homozygous	conservative	A[A-V]ELSQSAEEVFTDTSTYLGGK
MSTRG.1534.5	nonsynonymous	c.C1480A	p.Q494K	homozygous	nonconservative	AVELSQSAEEVFTDTSTYLGG[Q-K]
MSTRG.1534.5	nonsynonymous	c.C1668G	p.F556L	homozygous	conservative	HSFEE[F-L]VSSTYDK
MSTRG.1534.5	nonsynonymous	c.C890T	p.A297V	homozygous	conservative	VVHGSDS[A-V]TAAVEDAFSSVK
MSTRG.1534.5	nonsynonymous	c.G2200T	p.A734S	homozygous	nonconservative	AAEALH[A-S]AEETAAK
MSTRG.1534.5	nonsynonymous	c.G748A	p.V250I	homozygous	conservative	VEAG[V-I]VEALQHGADEAEK
MSTRG.1534.5	nonsynonymous	c.G880T	p.A294S	homozygous	nonconservative	VVHG[A-S]DSVTAAVEDAFSSVK
MSTRG.1534.5	nonsynonymous	c.T2008A	p.S670T	homozygous	conservative	ETAS[S-T]AELEYPPPPAPSPLPSSEAEEQAK
MSTRG.1534.5	nonsynonymous	c.T2056A	p.C686S	homozygous	conservative	ETASTAELEYPPPPAPSPLP[C-S]SEAEEQAK
MSTRG.1534.5	synonymous	c.C567T	p.S189S	homozygous	NA	TSGAV[S-S]AIGGVLSETK
MSTRG.1534.6	nonsynonymous	c.A1409G	p.E470G	homozygous	nonconservative	AVELSQSAEEVFTDTSTYL[E-G]GK
MSTRG.1534.6	nonsynonymous	c.A556G	p.S186G	homozygous	nonconservative	TS[S-G]AVSAIGGVLSETK
MSTRG.1534.6	nonsynonymous	c.A876T	p.Q292H	homozygous	nonconservative	VV[Q-H]GSDSVTAAVEDAFSSVK
MSTRG.1534.6	nonsynonymous	c.C1355T	p.A452V	homozygous	conservative	A[A-V]ELSQSAEEVFTDTSTYLGGK
MSTRG.1534.6	nonsynonymous	c.C1414A	p.Q472K	homozygous	nonconservative	AVELSQSAEEVFTDTSTYLGG[Q-K]
MSTRG.1534.6	nonsynonymous	c.C1602G	p.F534L	homozygous	conservative	HSFEE[F-L]VSSTYDK
MSTRG.1534.6	nonsynonymous	c.C890T	p.A297V	homozygous	conservative	VVHGSDS[A-V]TAAVEDAFSSVK
MSTRG.1534.6	nonsynonymous	c.G2134T	p.A712S	homozygous	nonconservative	AAEALH[A-S]AEETAAK
MSTRG.1534.6	nonsynonymous	c.G748A	p.V250I	homozygous	conservative	VEAG[V-I]VEALQHGADEAEK
MSTRG.1534.6	nonsynonymous	c.G880T	p.A294S	homozygous	nonconservative	VVHG[A-S]DSVTAAVEDAFSSVK
MSTRG.1534.6	nonsynonymous	c.T1942A	p.S648T	homozygous	conservative	ETAS[S-T]AELEYPPPPAPSPLPSSEAEEQAK
MSTRG.1534.6	nonsynonymous	c.T1990A	p.C664S	homozygous	conservative	ETASTAELEYPPPPAPSPLP[C-S]SEAEEQAK
MSTRG.1534.6	synonymous	c.C567T	p.S189S	homozygous	NA	TSGAV[S-S]AIGGVLSETK
MSTRG.1534.7	nonsynonymous	c.A1475G	p.E492G	homozygous	nonconservative	AVELSQSAEEVFTDTSTYL[E-G]GK
MSTRG.1534.7	nonsynonymous	c.A556G	p.S186G	homozygous	nonconservative	TS[S-G]AVSAIGGVLSETK
MSTRG.1534.7	nonsynonymous	c.A876T	p.Q292H	homozygous	nonconservative	VV[Q-H]GSDSVTAAVEDAFSSVK
MSTRG.1534.7	nonsynonymous	c.C1421T	p.A474V	homozygous	conservative	A[A-V]ELSQSAEEVFTDTSTYLGGK
MSTRG.1534.7	nonsynonymous	c.C1480A	p.Q494K	homozygous	nonconservative	AVELSQSAEEVFTDTSTYLGG[Q-K]
MSTRG.1534.7	nonsynonymous	c.C1668G	p.F556L	homozygous	conservative	HSFEE[F-L]VSSTYDK
MSTRG.1534.7	nonsynonymous	c.C890T	p.A297V	homozygous	conservative	VVHGSDS[A-V]TAAVEDAFSSVK
MSTRG.1534.7	nonsynonymous	c.G2200T	p.A734S	homozygous	nonconservative	AAEALH[A-S]AEETAAK
MSTRG.1534.7	nonsynonymous	c.G748A	p.V250I	homozygous	conservative	VEAG[V-I]VEALQHGADEAEK
MSTRG.1534.7	nonsynonymous	c.G880T	p.A294S	homozygous	nonconservative	VVHG[A-S]DSVTAAVEDAFSSVK
MSTRG.1534.7	nonsynonymous	c.T2008A	p.S670T	homozygous	conservative	ETAS[S-T]AELEYPPPPAPSPLPSSEAEEQAK
MSTRG.1534.7	nonsynonymous	c.T2056A	p.C686S	homozygous	conservative	ETASTAELEYPPPPAPSPLP[C-S]SEAEEQAK
MSTRG.1534.7	synonymous	c.C567T	p.S189S	homozygous	NA	TSGAV[S-S]AIGGVLSETK
MSTRG.1534.8	nonsynonymous	c.A1550G	p.E517G	homozygous	nonconservative	AVELSQSAEEVFTDTSTYL[E-G]GK
MSTRG.1534.8	nonsynonymous	c.A631G	p.S211G	homozygous	nonconservative	TS[S-G]AVSAIGGVLSETK
MSTRG.1534.8	nonsynonymous	c.A951T	p.Q317H	homozygous	nonconservative	VV[Q-H]GSDSVTAAVEDAFSSVK
MSTRG.1534.8	nonsynonymous	c.C1496T	p.A499V	homozygous	conservative	A[A-V]ELSQSAEEVFTDTSTYLGGK
MSTRG.1534.8	nonsynonymous	c.C1555A	p.Q519K	homozygous	nonconservative	AVELSQSAEEVFTDTSTYLGG[Q-K]
MSTRG.1534.8	nonsynonymous	c.C1743G	p.F581L	homozygous	conservative	HSFEE[F-L]VSSTYDK
MSTRG.1534.8	nonsynonymous	c.C965T	p.A322V	homozygous	conservative	VVHGSDS[A-V]TAAVEDAFSSVK
MSTRG.1534.8	nonsynonymous	c.G2275T	p.A759S	homozygous	nonconservative	AAEALH[A-S]AEETAAK
MSTRG.1534.8	nonsynonymous	c.G823A	p.V275I	homozygous	conservative	VEAG[V-I]VEALQHGADEAEK
MSTRG.1534.8	nonsynonymous	c.G955T	p.A319S	homozygous	nonconservative	VVHG[A-S]DSVTAAVEDAFSSVK
MSTRG.1534.8	nonsynonymous	c.T2083A	p.S695T	homozygous	conservative	ETAS[S-T]AELEYPPPPAPSPLPSSEAEEQAK
MSTRG.1534.8	nonsynonymous	c.T2131A	p.C711S	homozygous	conservative	ETASTAELEYPPPPAPSPLP[C-S]SEAEEQAK
MSTRG.1534.8	synonymous	c.C642T	p.S214S	homozygous	NA	TSGAV[S-S]AIGGVLSETK
MSTRG.1564.1	nonsynonymous	c.C680T	p.S227L	homozygous	nonconservative	SDENAL[S-L]EIFNPILTQQR
MSTRG.1565.2	nonsynonymous	c.A365G	p.N122S	homozygous	conservative	Y[N-S]LSEEHPGFDVSPTLNDLVAMPK
MSTRG.1565.2	nonsynonymous	c.A426G	p.I142M	homozygous	conservative	YSLSEEHPGFDVSPTLNDLVA[I-M]PK
MSTRG.1584.1	nonsynonymous	c.G496A	p.A166T	homozygous	nonconservative	GV[A-T]DGGINVPHSENR
MSTRG.1584.1	synonymous	c.T516C	p.V172V	homozygous	NA	GVTDGGIN[V-V]PHSENR
MSTRG.1621.1	nonsynonymous	c.C1454T	p.T485I	homozygous	nonconservative	A[T-I]GGTAATGAVNNAEAANK
MSTRG.1621.1	nonsynonymous	c.C1693G	p.H565D	homozygous	nonconservative	SAQTEGGVVSSVA[H-D]GGGK
MSTRG.1621.1	nonsynonymous	c.G1009C	p.D337H	homozygous	nonconservative	GAHGEAIFYADDECQPD[D-H]R
MSTRG.1621.1	nonsynonymous	c.G1543A	p.V515I	homozygous	conservative	THGQQIANANIL[V-I]QSK
MSTRG.1621.1	nonsynonymous	c.G1718A	p.S573N	homozygous	conservative	GTT[S-N]FYVRPGAYASTQGGGAQAQGGGAQAQAR
MSTRG.1621.1	nonsynonymous	c.G1729A	p.G577R	homozygous	nonconservative	GTTNFYV[G-R]PGAYASTQGGGAQAQGGGAQAQAR
MSTRG.1621.1	nonsynonymous	c.G1729A	p.G577R	homozygous	nonconservative	V[G-R]PGAYASTQGGGAQAQGGGAQAQAR
MSTRG.1621.1	nonsynonymous	c.G1729A	p.G577R	homozygous	nonconservative	YV[G-R]PGAYASTQGGGAQAQGGGAQAQAR
MSTRG.1621.1	nonsynonymous	c.T271C	p.S91P	homozygous	nonconservative	QTQAG[S-P]SALLSDGANMNFCMMPTK
MSTRG.1621.1	synonymous	c.A1764G	p.G588G	homozygous	NA	ASTQGG[G-G]AQAQGGGAQAQAR
MSTRG.1621.1	synonymous	c.A1764G	p.G588G	homozygous	NA	GTTNFYVRPGAYASTQGG[G-G]AQAQGGGAQAQAR
MSTRG.1621.1	synonymous	c.A1764G	p.G588G	homozygous	NA	VRPGAYASTQGG[G-G]AQAQGGGAQAQAR
MSTRG.1621.1	synonymous	c.A1764G	p.G588G	homozygous	NA	YVRPGAYASTQGG[G-G]AQAQGGGAQAQAR
MSTRG.1621.1	synonymous	c.G1737C	p.G579G	homozygous	NA	GTTNFYVRP[G-G]AYASTQGGGAQAQGGGAQAQAR
MSTRG.1621.1	synonymous	c.G1737C	p.G579G	homozygous	NA	VRP[G-G]AYASTQGGGAQAQGGGAQAQAR
MSTRG.1621.1	synonymous	c.G1737C	p.G579G	homozygous	NA	YVRP[G-G]AYASTQGGGAQAQGGGAQAQAR
MSTRG.1621.1	synonymous	c.T1656C	p.S552S	homozygous	NA	[S-S]AQTEGGVVSSVADGGGK
MSTRG.1623.1	nonsynonymous	c.G625A	p.V209I	homozygous	conservative	DVITDN[V-I]YPEAINMFAVNLFR
MSTRG.1650.2	nonsynonymous	c.A203C	p.E68A	homozygous	nonconservative	CSPTPPESLG[E-A]SYTNFEHSELDQGPINTSHATLAYR
MSTRG.1650.2	nonsynonymous	c.G268T	p.V90L	homozygous	conservative	CSPTPPESLGASYTNFEHSELDQGPINTSHAT[V-L]AYR
MSTRG.1650.2	nonsynonymous	c.G341A	p.R114Q	homozygous	nonconservative	MLRPDI[R-Q]SVGCAVAK
MSTRG.1650.2	nonsynonymous	c.T254C	p.I85T	homozygous	nonconservative	CSPTPPESLGASYTNFEHSELDQGPIN[I-T]SHATLAYR
MSTRG.1650.2	synonymous	c.A192G	p.E64E	homozygous	NA	CSPTPP[E-E]SLGASYTNFEHSELDQGPINTSHATLAYR
MSTRG.1652.1	nonsynonymous	c.A331G	p.I111V	homozygous	conservative	INEAQAT[I-V]ENVLTDFNPNGEK
MSTRG.1652.1	nonsynonymous	c.C353T	p.S118F	homozygous	nonconservative	INEAQATVENVLTD[S-F]NPNGEK
MSTRG.1656.1	nonsynonymous	c.A2717G	p.K906R	homozygous	conservative	HPPIVAESVSVVPNVSHTPVL[K-R]
MSTRG.1656.1	nonsynonymous	c.A328G	p.T110A	homozygous	nonconservative	SIVIHP[T-A]QSFIITASDDMMIK
MSTRG.1656.1	nonsynonymous	c.C2663T	p.T888I	homozygous	nonconservative	HPP[T-I]VAESVSVVPNVSHTPVLR
MSTRG.1656.1	nonsynonymous	c.C2711T	p.A904V	homozygous	conservative	HPPIVAESVSVVPNVSHTP[A-V]LR
MSTRG.1656.1	nonsynonymous	c.G1381T	p.V461L	homozygous	conservative	SPSSLCFYDWETAQL[V-L]R
MSTRG.1656.1	nonsynonymous	c.G2540C	p.S847T	homozygous	conservative	TAL[S-T]TGAVTFDEAGQAHLR
MSTRG.1666.1	nonsynonymous	c.G518A	p.R173H	homozygous	conservative	TEDSA[R-H]SMNSAQQTPIGSGELTDGTIVSK
MSTRG.1666.1	synonymous	c.G561A	p.E187E	homozygous	NA	TEDSAHSMNSAQQTPIGSG[E-E]LTDGTIVSK
MSTRG.1666.1	synonymous	c.G576C	p.T192T	homozygous	NA	TEDSAHSMNSAQQTPIGSGELTDG[T-T]IVSK
MSTRG.1679.1	nonsynonymous	c.G202A	p.V68I	homozygous	conservative	MLVDDVGDV[V-I]VTNDGATILK
MSTRG.1713.1	nonsynonymous	c.C131T	p.T44I	homozygous	nonconservative	KPIAPTDLVVSP[T-I]IEVK
MSTRG.1717.1	nonsynonymous	c.C1025T	p.T342M	homozygous	nonconservative	EQ[T-M]EHTVQQTTIDSSGK
MSTRG.1717.1	synonymous	c.A1041G	p.Q347Q	homozygous	NA	EQMEHTV[Q-Q]QTTIDSSGK
MSTRG.1717.2	nonsynonymous	c.C1025T	p.T342M	homozygous	nonconservative	EQ[T-M]EHTVQQTTIDSSGK
MSTRG.1717.2	synonymous	c.A1041G	p.Q347Q	homozygous	NA	EQMEHTV[Q-Q]QTTIDSSGK
MSTRG.1721.1	nonsynonymous	c.A849C	p.Q283H	homozygous	nonconservative	TTADP[Q-H]NVNAEELETAGPSTSK
MSTRG.1723.1	nonsynonymous	c.T971A	p.L324H	homozygous	nonconservative	HV[L-H]NSGVTPVSFTEEDNPTQERPK
MSTRG.1723.1	synonymous	c.A1035G	p.K345K	homozygous	NA	HVHNSGVTPVSFTEEDNPTQERP[K-K]
MSTRG.1741.2	nonsynonymous	c.A400T	p.M134L	homozygous	conservative	YDSVCHTPEGVRPIMGQW[M-L]SEEQFAK
MSTRG.1741.2	nonsynonymous	c.A822T	p.E274D	homozygous	conservative	[E-D]EGWMAEHMLIMSITNPAGEER
MSTRG.1741.2	nonsynonymous	c.C1741G	p.P581A	homozygous	conservative	RVDGTEDIAEET[P-A]IGYIPK
MSTRG.1741.2	nonsynonymous	c.G856A	p.G286S	homozygous	nonconservative	DEGWMAEHMLIM[G-S]ITNPAGEER
MSTRG.1741.2	synonymous	c.A411G	p.E137E	homozygous	NA	YDSVCHTPEGVRPIMGQWLSE[E-E]QFAK
MSTRG.1741.2	synonymous	c.A885T	p.R295R	homozygous	NA	DEGWMAEHMLIMSITNPAGEE[R-R]
MSTRG.1741.2	synonymous	c.T1920C	p.T640T	homozygous	NA	HFLECQVGPDLPKPIADEL[T-T]K
MSTRG.1741.2	synonymous	c.T360C	p.C120C	homozygous	NA	YDSV[C-C]HTPEGVRPIMGQWLSEEQFAK
MSTRG.1777.1	nonsynonymous	c.T3987G	p.D1329E	homozygous	conservative	VDVLSFVGE[D-E]HIHPLVVVGQNNEVSLYPPQPK
MSTRG.1777.1	synonymous	c.C3996T	p.H1332H	homozygous	NA	VDVLSFVGEEHI[H-H]PLVVVGQNNEVSLYPPQPK
MSTRG.1777.1	synonymous	c.G4041A	p.P1347P	homozygous	NA	VDVLSFVGEEHIHPLVVVGQNNEVSLY[P-P]PQPK
MSTRG.178.1	nonsynonymous	c.A11276G	p.D3759G	homozygous	nonconservative	NEIGEDEGVFEVIVQDRPGAPEGPLEVS[D-G]VTK
MSTRG.178.1	nonsynonymous	c.A15949G	p.I5317V	homozygous	conservative	VSAANENGQGVPLVGENP[I-V]ITR
MSTRG.178.1	nonsynonymous	c.A498T	p.E166D	homozygous	conservative	DGVPLQMGGLYHAIFTDLG[E-D]QTYLCQLEIR
MSTRG.178.1	nonsynonymous	c.A5566G	p.T1856A	homozygous	nonconservative	NPYDEPGKPH[T-A]LEVMDWDADR
MSTRG.178.1	nonsynonymous	c.C13040T	p.S4347F	homozygous	nonconservative	PSELVVIQEQPGRPVFDL[S-F]NLK
MSTRG.178.1	nonsynonymous	c.C13040T	p.S4347F	homozygous	nonconservative	VIAVNSAGEGEPSKPSELVVIQEQPGRPVFDL[S-F]NLK
MSTRG.178.1	nonsynonymous	c.C15926T	p.A5309V	homozygous	conservative	VSAANENGQG[A-V]PLVGENPVITR
MSTRG.178.1	nonsynonymous	c.C5570T	p.P1857L	homozygous	conservative	NPYDEPGKPHA[P-L]EVMDWDADR
MSTRG.178.1	nonsynonymous	c.C5579T	p.T1860M	homozygous	nonconservative	NPYDEPGKPHALEV[T-M]DWDADR
MSTRG.178.1	nonsynonymous	c.C5618G	p.P1873R	homozygous	nonconservative	VSLEWQ[P-R]PDSDGGAPITQYIIEK
MSTRG.178.1	nonsynonymous	c.C8428T	p.L2810F	homozygous	conservative	AGQEIHLNVPVSGEPPPEITWT[L-F]DGSPVESDDR
MSTRG.178.1	nonsynonymous	c.G142A	p.A48T	homozygous	nonconservative	LLEADPAPTISWQHAGNVITSS[A-T]R
MSTRG.178.1	nonsynonymous	c.G142A	p.A48T	homozygous	nonconservative	PSIQQTPTGDLLMECLLEADPAPTISWQHAGNVITSS[A-T]R
MSTRG.178.1	nonsynonymous	c.G14501A	p.S4834N	homozygous	conservative	YQF[S-N]VPSQPDAPTVHDVDATSAR
MSTRG.178.1	nonsynonymous	c.G7054A	p.V2352I	homozygous	conservative	A[V-I]NSEGASDPLESDTDVLAK
MSTRG.178.1	nonsynonymous	c.T860C	p.M287T	homozygous	nonconservative	TSTPVLEPAN[M-T]LAPEDAVSIEDSR
MSTRG.178.1	synonymous	c.A12975G	p.E4325E	homozygous	NA	VIAVNSAGEG[E-E]PSKPSELVVIQEQPGRPVFDLFNLK
MSTRG.178.1	synonymous	c.A516G	p.Q172Q	homozygous	NA	DGVPLQMGGLYHAIFTDLGDQTYLC[Q-Q]LEIR
MSTRG.178.1	synonymous	c.C14535T	p.H4845H	homozygous	NA	YQFNVPSQPDAPTV[H-H]DVDATSAR
MSTRG.178.1	synonymous	c.G447A	p.V149V	homozygous	NA	DG[V-V]PLQMGGLYHAIFTDLGDQTYLCQLEIR
MSTRG.178.1	synonymous	c.G8382A	p.L2794L	heterozygous	NA	AGQEIH[L-L]NVPVSGEPPPEITWTFDGSPVESDDR
MSTRG.178.1	synonymous	c.T11238C	p.D3746D	homozygous	NA	NEIGEDEGVFEVIVQ[D-D]RPGAPEGPLEVSGVTK
MSTRG.178.1	synonymous	c.T117C	p.H39H	homozygous	NA	LLEADPAPTISWQ[H-H]AGNVITSSTR
MSTRG.178.1	synonymous	c.T117C	p.H39H	homozygous	NA	PSIQQTPTGDLLMECLLEADPAPTISWQ[H-H]AGNVITSSTR
MSTRG.178.1	synonymous	c.T13029A	p.V4343V	homozygous	NA	PSELVVIQEQPGRP[V-V]FDLFNLK
MSTRG.178.1	synonymous	c.T13029A	p.V4343V	homozygous	NA	VIAVNSAGEGEPSKPSELVVIQEQPGRP[V-V]FDLFNLK
MSTRG.178.1	synonymous	c.T7098C	p.D2366D	homozygous	NA	AINSEGASDPLESDT[D-D]VLAK
MSTRG.178.1	synonymous	c.T852C	p.P284P	homozygous	NA	TSTPVLE[P-P]ANTLAPEDAVSIEDSR
MSTRG.178.2	nonsynonymous	c.A11555G	p.D3852G	homozygous	nonconservative	NEIGEDEGVFEVIVQDRPGAPEGPLEVS[D-G]VTK
MSTRG.178.2	nonsynonymous	c.A16228G	p.I5410V	homozygous	conservative	VSAANENGQGVPLVGENP[I-V]ITR
MSTRG.178.2	nonsynonymous	c.A498T	p.E166D	homozygous	conservative	DGVPLQMGGLYHAIFTDLG[E-D]QTYLCQLEIR
MSTRG.178.2	nonsynonymous	c.A5845G	p.T1949A	homozygous	nonconservative	NPYDEPGKPH[T-A]LEVMDWDADR
MSTRG.178.2	nonsynonymous	c.C13319T	p.S4440F	homozygous	nonconservative	PSELVVIQEQPGRPVFDL[S-F]NLK
MSTRG.178.2	nonsynonymous	c.C13319T	p.S4440F	homozygous	nonconservative	VIAVNSAGEGEPSKPSELVVIQEQPGRPVFDL[S-F]NLK
MSTRG.178.2	nonsynonymous	c.C16205T	p.A5402V	homozygous	conservative	VSAANENGQG[A-V]PLVGENPVITR
MSTRG.178.2	nonsynonymous	c.C5849T	p.P1950L	homozygous	conservative	NPYDEPGKPHA[P-L]EVMDWDADR
MSTRG.178.2	nonsynonymous	c.C5858T	p.T1953M	homozygous	nonconservative	NPYDEPGKPHALEV[T-M]DWDADR
MSTRG.178.2	nonsynonymous	c.C5897G	p.P1966R	homozygous	nonconservative	VSLEWQ[P-R]PDSDGGAPITQYIIEK
MSTRG.178.2	nonsynonymous	c.C8707T	p.L2903F	homozygous	conservative	AGQEIHLNVPVSGEPPPEITWT[L-F]DGSPVESDDR
MSTRG.178.2	nonsynonymous	c.G142A	p.A48T	homozygous	nonconservative	LLEADPAPTISWQHAGNVITSS[A-T]R
MSTRG.178.2	nonsynonymous	c.G142A	p.A48T	homozygous	nonconservative	PSIQQTPTGDLLMECLLEADPAPTISWQHAGNVITSS[A-T]R
MSTRG.178.2	nonsynonymous	c.G14780A	p.S4927N	homozygous	conservative	YQF[S-N]VPSQPDAPTVHDVDATSAR
MSTRG.178.2	nonsynonymous	c.G7333A	p.V2445I	homozygous	conservative	A[V-I]NSEGASDPLESDTDVLAK
MSTRG.178.2	nonsynonymous	c.T860C	p.M287T	homozygous	nonconservative	TSTPVLEPAN[M-T]LAPEDAVSIEDSR
MSTRG.178.2	synonymous	c.A13254G	p.E4418E	homozygous	NA	VIAVNSAGEG[E-E]PSKPSELVVIQEQPGRPVFDLFNLK
MSTRG.178.2	synonymous	c.A516G	p.Q172Q	homozygous	NA	DGVPLQMGGLYHAIFTDLGDQTYLC[Q-Q]LEIR
MSTRG.178.2	synonymous	c.C14814T	p.H4938H	homozygous	NA	YQFNVPSQPDAPTV[H-H]DVDATSAR
MSTRG.178.2	synonymous	c.G447A	p.V149V	homozygous	NA	DG[V-V]PLQMGGLYHAIFTDLGDQTYLCQLEIR
MSTRG.178.2	synonymous	c.G8661A	p.L2887L	heterozygous	NA	AGQEIH[L-L]NVPVSGEPPPEITWTFDGSPVESDDR
MSTRG.178.2	synonymous	c.T11517C	p.D3839D	homozygous	NA	NEIGEDEGVFEVIVQ[D-D]RPGAPEGPLEVSGVTK
MSTRG.178.2	synonymous	c.T117C	p.H39H	homozygous	NA	LLEADPAPTISWQ[H-H]AGNVITSSTR
MSTRG.178.2	synonymous	c.T117C	p.H39H	homozygous	NA	PSIQQTPTGDLLMECLLEADPAPTISWQ[H-H]AGNVITSSTR
MSTRG.178.2	synonymous	c.T13308A	p.V4436V	homozygous	NA	PSELVVIQEQPGRP[V-V]FDLFNLK
MSTRG.178.2	synonymous	c.T13308A	p.V4436V	homozygous	NA	VIAVNSAGEGEPSKPSELVVIQEQPGRP[V-V]FDLFNLK
MSTRG.178.2	synonymous	c.T7377C	p.D2459D	homozygous	NA	AINSEGASDPLESDT[D-D]VLAK
MSTRG.178.2	synonymous	c.T852C	p.P284P	homozygous	NA	TSTPVLE[P-P]ANTLAPEDAVSIEDSR
MSTRG.1783.1	nonsynonymous	c.A1105G	p.R369G	homozygous	nonconservative	QHIPTDMLNSVAVWQALLE[R-G]MPMTAM
MSTRG.1783.1	nonsynonymous	c.A1105G	p.R369G	homozygous	nonconservative	QHIPTDMLNSVAVWQALLE[R-G]MPMTAMIR
MSTRG.1783.1	nonsynonymous	c.A1805G	p.E602G	homozygous	nonconservative	TATDFTIAHP[E-G]DAGMLDIVGFDSAVPILLR
MSTRG.1783.1	nonsynonymous	c.C1853T	p.T618I	homozygous	nonconservative	TATDFTIAHPGDAGMLDIVGFDSAVP[T-I]LLR
MSTRG.1783.1	nonsynonymous	c.G1798C	p.D600H	homozygous	nonconservative	TATDFTIA[D-H]PGDAGMLDIVGFDSAVPILLR
MSTRG.1783.1	nonsynonymous	c.G845A	p.R282K	homozygous	conservative	VSNFPTTILEYEQLYHFAA[R-K]
MSTRG.1783.1	nonsynonymous	c.T830A	p.F277Y	homozygous	nonconservative	VSNFPTTILEYEQL[F-Y]HFAAK
MSTRG.1783.1	synonymous	c.A1050G	p.Q350Q	heterozygous	NA	[Q-Q]HIPTDMLNSVAVWQALLEGMPMTAM
MSTRG.1783.1	synonymous	c.A1050G	p.Q350Q	heterozygous	NA	[Q-Q]HIPTDMLNSVAVWQALLEGMPMTAMIR
MSTRG.1783.1	synonymous	c.A816G	p.E272E	homozygous	NA	VSNFPTTIL[E-E]YEQLYHFAAK
MSTRG.1819.1	nonsynonymous	c.A2449G	p.K817E	homozygous	nonconservative	YQIDSLGLQSI[K-E]DGDVILSNHPR
MSTRG.1819.1	nonsynonymous	c.G2222A	p.R741H	homozygous	conservative	IGTQIDPI[R-H]LSIFSNR
MSTRG.1819.1	nonsynonymous	c.G2454C	p.E818D	homozygous	conservative	YQIDSLGLQSIE[E-D]GDVILSNHPR
MSTRG.1819.1	synonymous	c.T2478C	p.H826H	homozygous	NA	YQIDSLGLQSIEDGDVILSN[H-H]PR
MSTRG.1834.1	nonsynonymous	c.A677C	p.N226T	homozygous	conservative	DLNLSSSFSHG[N-T]YTYSNTYNR
MSTRG.1834.1	nonsynonymous	c.G669C	p.R223S	homozygous	nonconservative	DLNLSSSF[R-S]HGTYTYSNTYNR
MSTRG.1834.1	synonymous	c.T702C	p.N234N	homozygous	NA	DLNLSSSFSHGTYTYSNTY[N-N]R
MSTRG.1842.1	nonsynonymous	c.G371A	p.S124N	homozygous	conservative	HNQEVSCFG[S-N]GAQSDSGDDWQLICDSEEWMESEAVR
MSTRG.1862.1	nonsynonymous	c.C2420A	p.A807E	homozygous	nonconservative	L[A-E]ERPPQLISNFETSFTTETAEICAFQCYR
MSTRG.1862.1	synonymous	c.A2496G	p.Q832Q	homozygous	NA	LEERPPQLISNFETSFTTETAEICAF[Q-Q]CYR
MSTRG.1872.1	nonsynonymous	c.A409G	p.I137V	heterozygous	conservative	TGDEEDLFGIIHNLL[I-V]SQHAR
MSTRG.1872.1	nonsynonymous	c.C605T	p.S202L	homozygous	nonconservative	TLHTLI[S-L]QSSILPDEFAR
MSTRG.1872.1	nonsynonymous	c.G1810C	p.V604L	homozygous	conservative	LIGEVLAWAALEHQ[V-L]VSEGAEEFVSPELTR
MSTRG.1872.1	synonymous	c.A1809G	p.Q603Q	homozygous	NA	LIGEVLAWAALEH[Q-Q]LVSEGAEEFVSPELTR
MSTRG.1872.1	synonymous	c.T420C	p.H140H	homozygous	NA	TGDEEDLFGIIHNLLVSQ[H-H]AR
MSTRG.1876.1	nonsynonymous	c.G147C	p.E49D	homozygous	conservative	SVQG[E-D]LAEDVDSLSFLDTLAEHVENASHK
MSTRG.1876.1	synonymous	c.T192C	p.A64A	homozygous	NA	SVQGDLAEDVDSLSFLDTL[A-A]EHVENASHK
MSTRG.1887.1	nonsynonymous	c.G31A	p.V11I	homozygous	conservative	VCL[V-I]VIDGWGISEDSHGNAIK
MSTRG.1887.1	nonsynonymous	c.G730A	p.D244N	homozygous	nonconservative	RYEAQETDEFLKPIILNG[D-N]K
MSTRG.1887.1	synonymous	c.C729T	p.G243G	homozygous	NA	RYEAQETDEFLKPIILN[G-G]NK
MSTRG.1887.1	synonymous	c.G78A	p.A26A	homozygous	NA	VCLIVIDGWGISEDSHGN[A-A]IK
MSTRG.189.1	nonsynonymous	c.G2957C	p.G986A	homozygous	conservative	TPHFESLKPDGVSAL[G-A]DVLK
MSTRG.1892.1	nonsynonymous	c.A136G	p.T46A	homozygous	nonconservative	GDVEEE[T-A]NVQTTGESSGDQNVQTK
MSTRG.1892.1	nonsynonymous	c.A142G	p.M48V	homozygous	conservative	GDVEEEAN[M-V]QTTGESSGDQNVQTK
MSTRG.1892.1	nonsynonymous	c.A259G	p.N87D	homozygous	nonconservative	EYIATETDTPGMSSTKPTDTVGS[N-D]VDVAPEK
MSTRG.1892.1	nonsynonymous	c.T167G	p.V56G	homozygous	conservative	GDVEEEANVQTTGESS[V-G]DQNVQTK
MSTRG.1892.1	synonymous	c.G201T	p.A67A	homozygous	NA	EYI[A-A]TETDTPGMSSTKPTDTVGSDVDVAPEK
MSTRG.1897.1	nonsynonymous	c.G896A	p.S299N	homozygous	conservative	RQQAHLTNSVAANEQPATTPMEFH[S-N]DGMASGK
MSTRG.1897.1	synonymous	c.G864A	p.E288E	homozygous	NA	RQQAHLTNSVAAN[E-E]QPATTPMEFHNDGMASGK
MSTRG.1897.2	nonsynonymous	c.G830A	p.S277N	homozygous	conservative	RQQAHLTNSVAANEQPATTPMEFH[S-N]DGMASGK
MSTRG.1897.2	synonymous	c.G798A	p.E266E	homozygous	NA	RQQAHLTNSVAAN[E-E]QPATTPMEFHNDGMASGK
MSTRG.19.1	nonsynonymous	c.G359A	p.S120N	homozygous	conservative	EYGEDIIEIQ[S-N]NVVSHGWR
MSTRG.1911.1	nonsynonymous	c.T1681A	p.S561T	homozygous	conservative	LFEGDSPLGDCPG[S-T]SAVFDVQLSQLHSHQFIR
MSTRG.1911.1	synonymous	c.T1659C	p.S553S	homozygous	NA	LFEGD[S-S]PLGDCPGTSAVFDVQLSQLHSHQFIR
MSTRG.1914.1	nonsynonymous	c.A728G	p.Y243C	homozygous	conservative	PVLSELGISTPEDLGYDKPELFIPQPE[Y-C]WWEK
MSTRG.1914.1	synonymous	c.C711T	p.F237F	homozygous	NA	PVLSELGISTPEDLGYDKPEL[F-F]IPQPECWWEK
MSTRG.1914.1	synonymous	c.T651C	p.V217V	homozygous	NA	P[V-V]LSELGISTPEDLGYDKPELFIPQPECWWEK
MSTRG.1927.1	nonsynonymous	c.C230T	p.T77I	homozygous	nonconservative	LYDTQTNTFNPLFNM[T-I]GGEGAVQGLHSVR
MSTRG.1927.1	nonsynonymous	c.T211A	p.Y71N	homozygous	conservative	LYDTQTNTF[Y-N]PLFNMIGGEGAVQGLHSVR
MSTRG.1927.1	synonymous	c.G216C	p.P72P	homozygous	NA	LYDTQTNTFN[P-P]LFNMIGGEGAVQGLHSVR
MSTRG.1954.1	nonsynonymous	c.A457G	p.T153A	homozygous	nonconservative	E[T-A]YAEIQQLTAEVHEAIAQGMVVQHK
MSTRG.196.1	nonsynonymous	c.A92G	p.E31G	homozygous	nonconservative	AASEHAPEGPS[E-G]CSR
MSTRG.196.1	nonsynonymous	c.A92G	p.E31G	homozygous	nonconservative	SVQEPLAASEHAPEGPS[E-G]CSR
MSTRG.196.1	nonsynonymous	c.G94T	p.G32C	homozygous	nonconservative	AASEHAPEGPSG[G-C]SR
MSTRG.196.1	nonsynonymous	c.G94T	p.G32C	homozygous	nonconservative	SVQEPLAASEHAPEGPSG[G-C]SR
MSTRG.196.1	nonsynonymous	c.T65C	p.F22S	homozygous	nonconservative	AA[F-S]EHAPEGPSGCSR
MSTRG.196.1	nonsynonymous	c.T65C	p.F22S	homozygous	nonconservative	SVQEPLAA[F-S]EHAPEGPSGCSR
MSTRG.1992.1	nonsynonymous	c.A5182G	p.S1728G	homozygous	nonconservative	QTLNDESPIGTTS[S-G]QMFIGGFAER
MSTRG.1992.1	nonsynonymous	c.G2761T	p.A921S	homozygous	nonconservative	[A-S]AMFAQLIDEYDEVFVQK
MSTRG.1992.1	nonsynonymous	c.T2764G	p.S922A	homozygous	nonconservative	S[S-A]MFAQLIDEYDEVFVQK
MSTRG.2008.1	nonsynonymous	c.A2515G	p.K839E	homozygous	nonconservative	[K-E]ATNSTTCTHLSDR
MSTRG.2008.1	nonsynonymous	c.A624G	p.I208M	homozygous	conservative	FNYQRPFQQSAP[I-M]ESYSTSSMNSASQPFK
MSTRG.2008.1	nonsynonymous	c.C668T	p.S223F	homozygous	nonconservative	FNYQRPFQQSAPMESYSTSSMNSASQP[S-F]K
MSTRG.2008.1	nonsynonymous	c.G2552A	p.G851D	homozygous	nonconservative	EATNSTTCTHLS[G-D]R
MSTRG.2033.1	nonsynonymous	c.G821A	p.S274N	homozygous	conservative	EHNAEYSFDYVEENVSN[S-N]K
MSTRG.2033.1	synonymous	c.C792T	p.F264F	homozygous	NA	EHNAEYS[F-F]DYVEENVSNNK
MSTRG.2033.3	nonsynonymous	c.G530A	p.S177N	homozygous	conservative	EHNAEYSFDYVEENVSN[S-N]K
MSTRG.2033.3	synonymous	c.C501T	p.F167F	homozygous	NA	EHNAEYS[F-F]DYVEENVSNNK
MSTRG.2052.1	nonsynonymous	c.A2056G	p.N686D	homozygous	nonconservative	IQNEHANVEVVEI[N-D]IPVK
MSTRG.2052.1	nonsynonymous	c.G1525A	p.V509M	homozygous	conservative	DETGVQISIPNEQTNSDEI[V-M]VEGK
MSTRG.2052.1	nonsynonymous	c.G1525A	p.V509M	homozygous	conservative	IKDETGVQISIPNEQTNSDEI[V-M]VEGK
MSTRG.2052.1	nonsynonymous	c.G2278C	p.V760L	homozygous	conservative	EINLYEDTV[V-L]AKPEFHR
MSTRG.2052.1	nonsynonymous	c.T2854C	p.F952L	homozygous	conservative	QEAAEENDGQD[F-L]VTISGR
MSTRG.2052.1	nonsynonymous	c.T2854C	p.F952L	homozygous	conservative	RQEAAEENDGQD[F-L]VTISGR
MSTRG.2052.1	synonymous	c.G1509A	p.T503T	homozygous	NA	DETGVQISIPNEQ[T-T]NSDEIMVEGK
MSTRG.2052.1	synonymous	c.G1509A	p.T503T	homozygous	NA	IKDETGVQISIPNEQ[T-T]NSDEIMVEGK
MSTRG.2052.2	nonsynonymous	c.A2098G	p.N700D	homozygous	nonconservative	IQNEHANVEVVEI[N-D]IPVK
MSTRG.2052.2	nonsynonymous	c.G1567A	p.V523M	homozygous	conservative	DETGVQISIPNEQTNSDEI[V-M]VEGK
MSTRG.2052.2	nonsynonymous	c.G1567A	p.V523M	homozygous	conservative	IKDETGVQISIPNEQTNSDEI[V-M]VEGK
MSTRG.2052.2	nonsynonymous	c.G2320C	p.V774L	homozygous	conservative	EINLYEDTV[V-L]AKPEFHR
MSTRG.2052.2	nonsynonymous	c.T2896C	p.F966L	homozygous	conservative	QEAAEENDGQD[F-L]VTISGR
MSTRG.2052.2	nonsynonymous	c.T2896C	p.F966L	homozygous	conservative	RQEAAEENDGQD[F-L]VTISGR
MSTRG.2052.2	synonymous	c.G1551A	p.T517T	homozygous	NA	DETGVQISIPNEQ[T-T]NSDEIMVEGK
MSTRG.2052.2	synonymous	c.G1551A	p.T517T	homozygous	NA	IKDETGVQISIPNEQ[T-T]NSDEIMVEGK
MSTRG.2088.1	nonsynonymous	c.A1300G	p.I434V	homozygous	conservative	IIWSGGGAEGGESDVF[I-V]ER
MSTRG.2088.1	nonsynonymous	c.A1300G	p.I434V	homozygous	conservative	IIWSGGGAEGGESDVF[I-V]ERDEFPYSK
MSTRG.2088.1	nonsynonymous	c.A2149G	p.T717A	homozygous	nonconservative	AYDDYVAGGEAHSHIDS[T-A]DMEK
MSTRG.2088.1	nonsynonymous	c.G359A	p.R120Q	homozygous	nonconservative	VNYQG[R-Q]QSVFTPEQILAALLTK
MSTRG.2088.1	synonymous	c.A363G	p.Q121Q	homozygous	NA	VNYQGQ[Q-Q]SVFTPEQILAALLTK
MSTRG.2088.1	synonymous	c.C1263T	p.S421S	homozygous	NA	IIW[S-S]GGGAEGGESDVFVER
MSTRG.2088.1	synonymous	c.C1263T	p.S421S	homozygous	NA	IIW[S-S]GGGAEGGESDVFVERDEFPYSK
MSTRG.2088.1	synonymous	c.T2139C	p.H713H	homozygous	NA	AYDDYVAGGEAHS[H-H]IDSADMEK
MSTRG.2109.1	nonsynonymous	c.A778G	p.N260D	homozygous	nonconservative	SAELS[N-D]LLAENEMLR
MSTRG.2138.2	nonsynonymous	c.G432A	p.M144I	homozygous	conservative	LDDGGHAFFEVPLDSG[M-I]K
MSTRG.2154.1	nonsynonymous	c.A477T	p.E159D	homozygous	conservative	KKE[E-D]ETVTETETEEK
MSTRG.2154.1	synonymous	c.G507A	p.E169E	homozygous	NA	KKEDETVTETETE[E-E]K
MSTRG.216.1	nonsynonymous	c.T193A	p.C65S	homozygous	conservative	[C-S]QIPASCGANNDHHSSASCR
MSTRG.2197.1	nonsynonymous	c.A2572G	p.M858V	homozygous	conservative	RVDAEAEAAEEDADPDD[M-V]REK
MSTRG.2198.1	nonsynonymous	c.C1154G	p.P385R	homozygous	nonconservative	TPLSEDSFGDSPDTTATLE[P-R]
MSTRG.2198.1	nonsynonymous	c.T1139C	p.M380T	homozygous	nonconservative	TPLSEDSFGDSPDT[M-T]ATLER
MSTRG.2198.1	synonymous	c.C1107T	p.S369S	homozygous	NA	TPL[S-S]EDSFGDSPDTTATLER
MSTRG.22.1	nonsynonymous	c.A4850G	p.N1617S	homozygous	conservative	ACSTTLNQVHPLFAVGTFSSIVEQEM[N-S]R
MSTRG.22.1	synonymous	c.G4794A	p.Q1598Q	homozygous	NA	ACSTTLN[Q-Q]VHPLFAVGTFSSIVEQEMSR
MSTRG.22.2	nonsynonymous	c.A4853G	p.N1618S	homozygous	conservative	ACSTTLNQVHPLFAVGTFSSIVEQEM[N-S]R
MSTRG.22.2	synonymous	c.G4797A	p.Q1599Q	homozygous	NA	ACSTTLN[Q-Q]VHPLFAVGTFSSIVEQEMSR
MSTRG.2229.1	nonsynonymous	c.C193T	p.P65S	homozygous	nonconservative	SGSTLEEIDNT[P-S]QVSTTK
MSTRG.2229.1	synonymous	c.G204C	p.S68S	homozygous	NA	SGSTLEEIDNTSQV[S-S]TTK
MSTRG.2256.1	nonsynonymous	c.A32G	p.N11S	homozygous	conservative	VNTAHVSSS[N-S]STLSAQK
MSTRG.2256.1	nonsynonymous	c.C41T	p.S14L	homozygous	nonconservative	VNTAHVSSSSST[S-L]SAQK
MSTRG.2256.1	nonsynonymous	c.T46G	p.S16A	homozygous	nonconservative	VNTAHVSSSSSTLS[S-A]QK
MSTRG.2282.1	nonsynonymous	c.C45G	p.I15M	homozygous	conservative	AEGVE[I-M]DVTLHVLAVDGLTALQHR
MSTRG.2282.1	nonsynonymous	c.G52A	p.A18T	homozygous	nonconservative	AEGVEMDV[A-T]LHVLAVDGLTALQHR
MSTRG.2282.1	synonymous	c.G93A	p.Q31Q	homozygous	NA	AEGVEMDVTLHVLAVDGLTAL[Q-Q]HR
MSTRG.2304.1	nonsynonymous	c.A54T	p.E18D	homozygous	conservative	[E-D]HVDVNEVIMLMESYK
MSTRG.232.1	nonsynonymous	c.A7232G	p.N2411S	homozygous	conservative	ALAGEALGQVVSVSDP[N-S]SLK
MSTRG.232.1	nonsynonymous	c.A7592C	p.N2531T	homozygous	conservative	ALLAEL[N-T]VPLSDAAIQEGYR
MSTRG.232.1	nonsynonymous	c.G4283A	p.S1428N	homozygous	conservative	VIMDTLLPFLEQLSDTTP[S-N]GGEHDNLR
MSTRG.232.1	synonymous	c.T4230A	p.V1410V	homozygous	NA	[V-V]IMDTLLPFLEQLSDTTPNGGEHDNLR
MSTRG.232.1	synonymous	c.T4264C	p.L1422L	homozygous	NA	VIMDTLLPFLEQ[L-L]SDTTPNGGEHDNLR
MSTRG.232.1	synonymous	c.T4272C	p.D1424D	homozygous	NA	VIMDTLLPFLEQLS[D-D]TTPNGGEHDNLR
MSTRG.232.1	synonymous	c.T7579C	p.L2527L	homozygous	NA	AL[L-L]AELTVPLSDAAIQEGYR
MSTRG.2345.1	nonsynonymous	c.G332A	p.G111E	homozygous	nonconservative	KWEDG[G-E]DVSMIILK
MSTRG.2346.1	nonsynonymous	c.A1910T	p.H637L	homozygous	nonconservative	DNS[H-L]EVHGAGEGEGEGHNLER
MSTRG.2346.1	nonsynonymous	c.A1921G	p.S641G	homozygous	nonconservative	DNSLEVH[S-G]AGEGEGEGHNLER
MSTRG.2346.1	nonsynonymous	c.C1951A	p.H651N	homozygous	nonconservative	DNSLEVHGAGEGEGEGH[H-N]LER
MSTRG.2381.1	nonsynonymous	c.G230A	p.S77N	homozygous	conservative	QLVGTEAIT[S-N]EVVAQAHLENYALK
MSTRG.2381.1	synonymous	c.C240T	p.V80V	homozygous	NA	QLVGTEAITNEV[V-V]AQAHLENYALK
MSTRG.240.1	nonsynonymous	c.G708C	p.E236D	homozygous	conservative	E[E-D]STIHTCGDAGAEK
MSTRG.240.1	nonsynonymous	c.G708C	p.E236D	homozygous	conservative	KE[E-D]STIHTCGDAGAEK
MSTRG.240.2	nonsynonymous	c.G744C	p.E248D	homozygous	conservative	E[E-D]STIHTCGDAGAEK
MSTRG.240.2	nonsynonymous	c.G744C	p.E248D	homozygous	conservative	KE[E-D]STIHTCGDAGAEK
MSTRG.2408.1	nonsynonymous	c.T461C	p.V154A	heterozygous	conservative	DHLESSSLPLL[V-A]FPEGAITSGR
MSTRG.2425.5	nonsynonymous	c.G149C	p.G50A	homozygous	conservative	LQAPILLLTGHEDEIFA[G-A]R
MSTRG.2425.5	synonymous	c.T123C	p.T41T	homozygous	NA	LQAPILLL[T-T]GHEDEIFAAR
MSTRG.2432.1	nonsynonymous	c.G949C	p.A317P	homozygous	conservative	IGDPLE[A-P]HTIIGPLHNEAAVLK
MSTRG.2432.1	synonymous	c.C957A	p.T319T	homozygous	NA	IGDPLEPH[T-T]IIGPLHNEAAVLK
MSTRG.2432.1	synonymous	c.T939C	p.D313D	homozygous	NA	IG[D-D]PLEPHTIIGPLHNEAAVLK
MSTRG.2432.3	nonsynonymous	c.G1075C	p.A359P	homozygous	conservative	IGDPLE[A-P]HTIIGPLHNEAAVLK
MSTRG.2432.3	synonymous	c.C1083A	p.T361T	homozygous	NA	IGDPLEPH[T-T]IIGPLHNEAAVLK
MSTRG.2432.3	synonymous	c.T1065C	p.D355D	homozygous	NA	IG[D-D]PLEPHTIIGPLHNEAAVLK
MSTRG.2456.1	nonsynonymous	c.A916G	p.T306A	homozygous	nonconservative	KTDLDANVVVASATGG[T-A]R
MSTRG.2456.1	nonsynonymous	c.A916G	p.T306A	homozygous	nonconservative	TDLDANVVVASATGG[T-A]R
MSTRG.2456.1	nonsynonymous	c.C914G	p.A305G	homozygous	conservative	KTDLDANVVVASATG[A-G]AR
MSTRG.2456.1	nonsynonymous	c.C914G	p.A305G	homozygous	conservative	TDLDANVVVASATG[A-G]AR
MSTRG.2456.1	nonsynonymous	c.G1790A	p.R597Q	homozygous	nonconservative	MA[R-Q]ALWELALSCETLPDMSK
MSTRG.2456.1	nonsynonymous	c.G191C	p.G64A	homozygous	conservative	AQGLPNS[G-A]SEPGNSTCELCNAPSFATR
MSTRG.2456.1	nonsynonymous	c.G869A	p.R290K	homozygous	conservative	[R-K]TDLDANVVVASATGGAR
MSTRG.2456.1	synonymous	c.C906T	p.A302A	homozygous	NA	KTDLDANVVVAS[A-A]TGGAR
MSTRG.2456.1	synonymous	c.C906T	p.A302A	homozygous	NA	TDLDANVVVAS[A-A]TGGAR
MSTRG.2456.1	synonymous	c.G204A	p.G68G	homozygous	NA	AQGLPNSASEP[G-G]NSTCELCNAPSFATR
MSTRG.2490.1	nonsynonymous	c.G307A	p.A103T	homozygous	nonconservative	MFNIAEIEENIQQS[A-T]ATTPEDENLFVEHLR
MSTRG.2490.1	synonymous	c.T348C	p.H116H	homozygous	NA	MFNIAEIEENIQQSTATTPEDENLFVE[H-H]LR
MSTRG.2500.1	nonsynonymous	c.G3025T	p.A1009S	homozygous	nonconservative	EQQDVVVHVFS[A-S]GASSK
MSTRG.2500.1	synonymous	c.G3030A	p.G1010G	homozygous	NA	EQQDVVVHVFSS[G-G]ASSK
MSTRG.2532.1	nonsynonymous	c.G292T	p.A98S	homozygous	nonconservative	GLTPGLHGFHVHQYGD[A-S]TNGCISAGPHFNPF
MSTRG.2532.1	synonymous	c.T303A	p.G101G	homozygous	NA	GLTPGLHGFHVHQYGDSTN[G-G]CISAGPHFNPF
MSTRG.2532.2	nonsynonymous	c.G220T	p.A74S	homozygous	nonconservative	GLTPGLHGFHVHQYGD[A-S]TNGCISAGPHFNPF
MSTRG.2532.2	synonymous	c.T231A	p.G77G	homozygous	NA	GLTPGLHGFHVHQYGDSTN[G-G]CISAGPHFNPF
MSTRG.2538.1	nonsynonymous	c.C148T	p.P50S	homozygous	nonconservative	HVQQ[P-S]QLPQQTRPTEAIPGGR
MSTRG.2538.1	nonsynonymous	c.C181G	p.P61A	homozygous	conservative	HVQQSQLPQQTRPTE[P-A]IPGGR
MSTRG.2538.1	nonsynonymous	c.T1846A	p.S616T	homozygous	conservative	VGTRPEELDNP[S-T]FFQK
MSTRG.2538.1	synonymous	c.G192T	p.G64G	heterozygous	NA	HVQQSQLPQQTRPTEAIP[G-G]GR
MSTRG.2541.2	nonsynonymous	c.G385A	p.A129T	homozygous	nonconservative	QLVQSLTVFPDIIAAGG[A-T]PLDSTR
MSTRG.2541.2	synonymous	c.G345A	p.Q115Q	homozygous	NA	QLV[Q-Q]SLTVFPDIIAAGGTPLDSTR
MSTRG.2597.2	nonsynonymous	c.T377C	p.M126T	heterozygous	nonconservative	EFDVSSACLSDI[M-T]HYALTAVEYATHVDEHR
MSTRG.2597.2	synonymous	c.G429A	p.R143R	homozygous	NA	EFDVSSACLSDITHYALTAVEYATHVDEH[R-R]
MSTRG.2635.1	nonsynonymous	c.C1496T	p.A499V	homozygous	conservative	LHTAA[A-V]LTESIPTDTSDR
MSTRG.2635.1	nonsynonymous	c.T4372G	p.S1458A	homozygous	nonconservative	NTLTEDQS[S-A]VISTFAER
MSTRG.2635.1	synonymous	c.A4359G	p.T1453T	homozygous	NA	NTL[T-T]EDQSAVISTFAER
MSTRG.264.1	nonsynonymous	c.A827G	p.K276R	homozygous	conservative	SVLGWNQPGFGQSSGLPFP[K-R]
MSTRG.2643.1	nonsynonymous	c.A914G	p.E305G	homozygous	nonconservative	RREDVQEPPAPSWEIENVPEVAPVST[E-G]NAENNVDK
MSTRG.2643.1	nonsynonymous	c.T278C	p.V93A	homozygous	conservative	[V-A]LVESRPDAAHANVYLVDSGAR
MSTRG.2643.1	nonsynonymous	c.T869C	p.L290S	homozygous	nonconservative	RREDVQEPPAP[L-S]WEIENVPEVAPVSTGNAENNVDK
MSTRG.2643.1	synonymous	c.T282C	p.L94L	homozygous	NA	A[L-L]VESRPDAAHANVYLVDSGAR
MSTRG.2643.1	synonymous	c.T297C	p.P99P	homozygous	NA	ALVESR[P-P]DAAHANVYLVDSGAR
MSTRG.2643.2	nonsynonymous	c.A905G	p.E302G	homozygous	nonconservative	RREDVQEPPAPSWEIENVPEVAPVST[E-G]NAENNVDK
MSTRG.2643.2	nonsynonymous	c.T278C	p.V93A	homozygous	conservative	[V-A]LVESRPDAAHANVYLVDSGAR
MSTRG.2643.2	nonsynonymous	c.T860C	p.L287S	homozygous	nonconservative	RREDVQEPPAP[L-S]WEIENVPEVAPVSTGNAENNVDK
MSTRG.2643.2	synonymous	c.T282C	p.L94L	homozygous	NA	A[L-L]VESRPDAAHANVYLVDSGAR
MSTRG.2643.2	synonymous	c.T297C	p.P99P	homozygous	NA	ALVESR[P-P]DAAHANVYLVDSGAR
MSTRG.2669.2	nonsynonymous	c.G1298A	p.R433H	homozygous	conservative	[R-H]SSQSAHSNTGWLDDNK
MSTRG.2669.2	nonsynonymous	c.G1324A	p.A442T	homozygous	nonconservative	HSSQSAHSN[A-T]GWLDDNK
MSTRG.2669.3	nonsynonymous	c.G1436A	p.R479H	homozygous	conservative	[R-H]SSQSAHSNTGWLDDNK
MSTRG.2669.3	nonsynonymous	c.G1462A	p.A488T	homozygous	nonconservative	HSSQSAHSN[A-T]GWLDDNK
MSTRG.2708.2	nonsynonymous	c.A353T	p.Q118L	homozygous	nonconservative	LSFNTTLSSTP[Q-L]VNDRPNSEVATTLK
MSTRG.2708.2	nonsynonymous	c.T349C	p.S117P	homozygous	nonconservative	LSFNTTLSST[S-P]LVNDRPNSEVATTLK
MSTRG.2708.2	synonymous	c.A348G	p.T116T	homozygous	NA	LSFNTTLSS[T-T]PLVNDRPNSEVATTLK
MSTRG.272.1	nonsynonymous	c.A1149T	p.E383D	homozygous	conservative	LYASAPANGLFACPDDASP[E-D]K
MSTRG.272.1	nonsynonymous	c.G1756A	p.A586T	homozygous	nonconservative	CV[A-T]PENTNANHSAIGWLPQQLNVEGLQTNIEQLLQVDK
MSTRG.272.1	synonymous	c.C1143T	p.S381S	homozygous	NA	LYASAPANGLFACPDDA[S-S]PDK
MSTRG.272.1	synonymous	c.C1824T	p.G608G	homozygous	NA	CVTPENTNANHSAIGWLPQQLNVE[G-G]LQTNIEQLLQVDK
MSTRG.272.1	synonymous	c.C1848T	p.L616L	homozygous	NA	CVTPENTNANHSAIGWLPQQLNVEGLQTNIEQ[L-L]LQVDK
MSTRG.272.1	synonymous	c.T1140C	p.A380A	homozygous	NA	LYASAPANGLFACPDD[A-A]SPDK
MSTRG.2758.1	nonsynonymous	c.G614A	p.S205N	homozygous	conservative	SHL[S-N]VTPQQEGVVLYVPVPR
MSTRG.2758.1	synonymous	c.T618C	p.V206V	homozygous	NA	SHLN[V-V]TPQQEGVVLYVPVPR
MSTRG.2758.2	nonsynonymous	c.G467A	p.S156N	homozygous	conservative	SHL[S-N]VTPQQEGVVLYVPVPR
MSTRG.2758.2	synonymous	c.T471C	p.V157V	homozygous	NA	SHLN[V-V]TPQQEGVVLYVPVPR
MSTRG.2759.1	nonsynonymous	c.A370G	p.I124V	homozygous	conservative	AFLGS[I-V]DYLGNGLSNQPYLFR
MSTRG.2759.1	nonsynonymous	c.G398A	p.S133N	homozygous	conservative	AFLGSVDYLGNGLS[S-N]QPYLFR
MSTRG.277.1	nonsynonymous	c.A811G	p.I271V	homozygous	conservative	AHHQAN[I-V]AGHGAADEVNK
MSTRG.277.1	nonsynonymous	c.A838G	p.M280V	homozygous	conservative	AHHQANVAGHGAADE[M-V]NK
MSTRG.2785.1	nonsynonymous	c.G724T	p.A242S	homozygous	nonconservative	LALVSEFTQETA[A-S]VIFGGEIK
MSTRG.2785.1	nonsynonymous	c.T563C	p.V188A	homozygous	conservative	ANVYLEVASGIDSIPFGITSEDA[V-A]K
MSTRG.2803.1	nonsynonymous	c.G1099A	p.A367T	homozygous	nonconservative	HAQMQGPQ[A-T]ETFSTVGLHR
MSTRG.2803.1	nonsynonymous	c.T1084A	p.L362M	homozygous	conservative	HAQ[L-M]QGPQTETFSTVGLHR
MSTRG.2803.2	nonsynonymous	c.G1324A	p.A442T	homozygous	nonconservative	HAQMQGPQ[A-T]ETFSTVGLHR
MSTRG.2803.2	nonsynonymous	c.T1309A	p.L437M	homozygous	conservative	HAQ[L-M]QGPQTETFSTVGLHR
MSTRG.2813.1	nonsynonymous	c.A1324G	p.I442V	homozygous	conservative	DPLAATM[I-V]SLLQQSFSNSLR
MSTRG.2813.2	nonsynonymous	c.A2905G	p.I969V	homozygous	conservative	DPLAATM[I-V]SLLQQSFSNSLR
MSTRG.2813.3	nonsynonymous	c.A2971G	p.I991V	homozygous	conservative	DPLAATM[I-V]SLLQQSFSNSLR
MSTRG.2863.1	nonsynonymous	c.G553C	p.V185L	homozygous	conservative	LEQTFGDLFTHV[V-L]SHGQSAEEVLGR
MSTRG.2863.1	synonymous	c.A564C	p.G188G	homozygous	NA	LEQTFGDLFTHVLSH[G-G]QSAEEVLGR
MSTRG.2863.2	nonsynonymous	c.G583C	p.V195L	homozygous	conservative	LEQTFGDLFTHV[V-L]SHGQSAEEVLGR
MSTRG.2863.2	synonymous	c.A594C	p.G198G	homozygous	NA	LEQTFGDLFTHVLSH[G-G]QSAEEVLGR
MSTRG.3015.1	nonsynonymous	c.C283G	p.Q95E	homozygous	nonconservative	VTSPTAVDAQELSHTLV[Q-E]NMNR
MSTRG.3015.1	nonsynonymous	c.G244A	p.A82T	homozygous	nonconservative	VTSP[A-T]AVDAQELSHTLVENMNR
MSTRG.3015.1	nonsynonymous	c.G68A	p.S23N	homozygous	conservative	LLSELM[S-N]EAHQISMVQQADPSFLPH
MSTRG.3015.1	nonsynonymous	c.T337A	p.Y113N	homozygous	conservative	QSSL[Y-N]GTAATEEAFQHAFTLNEK
MSTRG.3015.1	synonymous	c.A237T	p.T79T	homozygous	NA	V[T-T]SPTAVDAQELSHTLVENMNR
MSTRG.3015.1	synonymous	c.A369G	p.Q123Q	homozygous	NA	QSSLNGTAATEEAF[Q-Q]HAFTLNEK
MSTRG.3015.1	synonymous	c.G390A	p.E130E	homozygous	NA	QSSLNGTAATEEAFQHAFTLN[E-E]K
MSTRG.3015.1	synonymous	c.T111C	p.S37S	homozygous	NA	LLSELMNEAHQISMVQQADP[S-S]FLPH
MSTRG.3038.1	nonsynonymous	c.A179T	p.D60V	homozygous	nonconservative	KSEGDVTL[D-V]DVLRPGR
MSTRG.3038.1	synonymous	c.T165C	p.G55G	homozygous	NA	KSE[G-G]DVTLVDVLRPGR
MSTRG.3038.1	synonymous	c.T175C	p.L59L	homozygous	NA	KSEGDVT[L-L]VDVLRPGR
MSTRG.3052.1	nonsynonymous	c.C989A	p.T330N	homozygous	conservative	GTA[T-N]VTAEVDMMREEANAAK
MSTRG.3097.1	nonsynonymous	c.A973G	p.N325D	homozygous	nonconservative	NQSYDTTV[N-D]NTSIHDNIR
MSTRG.3097.1	synonymous	c.A1002G	p.R334R	homozygous	NA	NQSYDTTVDNTSIHDNI[R-R]
MSTRG.3097.1	synonymous	c.T981A	p.T327T	homozygous	NA	NQSYDTTVDN[T-T]SIHDNIR
MSTRG.3127.1	nonsynonymous	c.A377G	p.E126G	homozygous	nonconservative	GAIQESAVLHTEG[E-G]LSGLNMR
MSTRG.3127.1	synonymous	c.C357T	p.A119A	homozygous	NA	GAIQES[A-A]VLHTEGGLSGLNMR
MSTRG.3132.1	nonsynonymous	c.A485G	p.D162G	homozygous	nonconservative	FVGTYYTSMDLLSYL[D-G]TNGER
MSTRG.3132.1	nonsynonymous	c.A485G	p.D162G	homozygous	nonconservative	VGTYYTSMDLLSYL[D-G]TNGER
MSTRG.3132.1	nonsynonymous	c.A500G	p.Q167R	homozygous	nonconservative	FVGTYYTSMDLLSYLGTNGE[Q-R]
MSTRG.3132.1	nonsynonymous	c.A500G	p.Q167R	homozygous	nonconservative	VGTYYTSMDLLSYLGTNGE[Q-R]
MSTRG.3132.1	synonymous	c.T480C	p.Y160Y	heterozygous	NA	FVGTYYTSMDLLS[Y-Y]LGTNGER
MSTRG.3132.1	synonymous	c.T480C	p.Y160Y	heterozygous	NA	VGTYYTSMDLLS[Y-Y]LGTNGER
MSTRG.3132.1	synonymous	c.T481C	p.L161L	homozygous	NA	FVGTYYTSMDLLSY[L-L]GTNGER
MSTRG.3132.1	synonymous	c.T481C	p.L161L	homozygous	NA	VGTYYTSMDLLSY[L-L]GTNGER
MSTRG.3159.1	nonsynonymous	c.A178G	p.I60V	homozygous	conservative	DVG[I-V]ECDDELPHQMFYYDSK
MSTRG.3159.1	nonsynonymous	c.C197T	p.P66L	homozygous	conservative	DVGVECDDE[P-L]PHQMFYYDSK
MSTRG.3159.1	nonsynonymous	c.G206A	p.R69Q	homozygous	nonconservative	DVGVECDDELPH[R-Q]MFYYDSK
MSTRG.3165.1	nonsynonymous	c.G298A	p.A100T	homozygous	nonconservative	SAVAHLHTAAEDINSIETGI[A-T]AIHQR
MSTRG.3182.1	nonsynonymous	c.T149C	p.V50A	homozygous	conservative	PA[V-A]VNVNESYSSDSPPVLR
MSTRG.3182.1	synonymous	c.T156C	p.N52N	homozygous	NA	PAAV[N-N]VNESYSSDSPPVLR
MSTRG.3210.1	nonsynonymous	c.G335A	p.R112K	homozygous	conservative	TRNEEFTFTLGMGQVI[R-K]
MSTRG.3219.2	nonsynonymous	c.A103G	p.K35E	homozygous	nonconservative	IVGQ[K-E]NVGTAVQAALESGYR
MSTRG.3219.2	synonymous	c.A123C	p.V41V	homozygous	NA	IVGQENVGTA[V-V]QAALESGYR
MSTRG.3219.2	synonymous	c.A148C	p.R50R	homozygous	NA	IVGQENVGTAVQAALESGY[R-R]
MSTRG.3228.2	nonsynonymous	c.G874A	p.E292K	homozygous	nonconservative	ADVLSALAECSIEEGNS[E-K]
MSTRG.329.1	nonsynonymous	c.G424A	p.V142I	homozygous	conservative	D[V-I]RDDWDDHEDLTSAEK
MSTRG.329.1	nonsynonymous	c.G435T	p.E145D	homozygous	conservative	DIRD[E-D]WDDHEDLTSAEK
MSTRG.3313.1	nonsynonymous	c.G275A	p.S92N	homozygous	conservative	AFESVSSMIEYHL[S-N]TSESLLK
MSTRG.3318.1	nonsynonymous	c.T76A	p.C26S	homozygous	conservative	[C-S]DVEGRPPPPVTQLSEHEQHLK
MSTRG.3318.1	synonymous	c.A99G	p.P33P	homozygous	NA	SDVEGRP[P-P]PPVTQLSEHEQHLK
MSTRG.3336.1	nonsynonymous	c.T1558G	p.C520G	homozygous	nonconservative	F[C-G]SNENELCSNSDTTSSIAKPEVSDTSVSR
MSTRG.3336.2	nonsynonymous	c.T1558G	p.C520G	homozygous	nonconservative	F[C-G]SNENELCSNSDTTSSIAKPEVSDTSVSR
MSTRG.3349.1	nonsynonymous	c.G247A	p.E83K	homozygous	nonconservative	ASQLALLAAEEVMSMS[E-K]
MSTRG.3360.1	nonsynonymous	c.A459T	p.Q153H	homozygous	nonconservative	VESTVYEQDLT[Q-H]ATFFEELDYATYK
MSTRG.3360.1	nonsynonymous	c.A481G	p.N161D	heterozygous	nonconservative	VESTVYEQDLTHATFFEEL[N-D]YATYK
MSTRG.3360.1	synonymous	c.T438C	p.V146V	homozygous	NA	VEST[V-V]YEQDLTHATFFEELDYATYK
MSTRG.3422.1	nonsynonymous	c.T1130A	p.V377D	heterozygous	nonconservative	HDN[V-D]DHQDTTPVVGK
MSTRG.3446.2	nonsynonymous	c.A1525G	p.I509V	homozygous	conservative	IVECVGFSDNL[I-V]ELPYNGDWTISR
MSTRG.3446.2	nonsynonymous	c.G1567A	p.V523M	homozygous	conservative	I[V-M]EYMDELDFGGTDCALPMLWAK
MSTRG.3446.2	synonymous	c.C1561A	p.R521R	homozygous	NA	IVECVGFSDNLVELPYNGDWTIS[R-R]
MSTRG.3446.2	synonymous	c.T1585C	p.L529L	heterozygous	NA	IMEYMDE[L-L]DFGGTDCALPMLWAK
MSTRG.345.1	nonsynonymous	c.G487A	p.V163I	homozygous	conservative	GFDDLGG[V-I]DNFSTETLENR
MSTRG.345.1	nonsynonymous	c.G508A	p.A170T	homozygous	nonconservative	GFDDLGGIDNFSTE[A-T]LENR
MSTRG.3456.1	nonsynonymous	c.G245A	p.R82K	homozygous	conservative	PLGTCYSNDDCFGGQCIGAFVG[R-K]
MSTRG.3488.1	nonsynonymous	c.G472A	p.G158S	homozygous	nonconservative	HG[G-S]DDYIFSLLTGYFEAPAGIK
MSTRG.3488.1	synonymous	c.C496T	p.L166L	homozygous	NA	HGSDDYIFSL[L-L]TGYFEAPAGIK
MSTRG.3488.1	synonymous	c.C519G	p.P173P	homozygous	NA	HGSDDYIFSLLTGYFEA[P-P]AGIK
MSTRG.352.1	nonsynonymous	c.A2266G	p.T756A	homozygous	nonconservative	ISDLFDIESYAD[T-A]FYAAATESVESR
MSTRG.352.1	synonymous	c.A2241G	p.L747L	homozygous	NA	ISD[L-L]FDIESYADAFYAAATESVESR
MSTRG.354.1	nonsynonymous	c.C563G	p.S188C	homozygous	conservative	[S-C]EVQQAVDLLYDAEHLHYFFTDR
MSTRG.3552.1	synonymous	c.C351T	p.T117T	homozygous	NA	ISFYM[T-T]NFGEEGTHIGSAAAVLDK
MSTRG.3630.1	nonsynonymous	c.A925G	p.M309V	homozygous	conservative	MNGVTLPENWWEQLD[M-V]ESEPNK
MSTRG.3630.1	nonsynonymous	c.G237A	p.M79I	homozygous	conservative	D[M-I]PVPISESGIPGVHCYYNEECELDGEDCIVHVYDR
MSTRG.3630.1	synonymous	c.A267T	p.P89P	homozygous	NA	DIPVPISESGI[P-P]GVHCYYNEECELDGEDCIVHVYDR
MSTRG.3630.1	synonymous	c.A291G	p.E97E	homozygous	NA	DIPVPISESGIPGVHCYYN[E-E]ECELDGEDCIVHVYDR
MSTRG.3630.1	synonymous	c.A894G	p.T298T	homozygous	NA	MNGV[T-T]LPENWWEQLDVESEPNK
MSTRG.3630.1	synonymous	c.C282T	p.Y94Y	homozygous	NA	DIPVPISESGIPGVHC[Y-Y]YNEECELDGEDCIVHVYDR
MSTRG.3630.1	synonymous	c.C900T	p.P300P	homozygous	NA	MNGVTL[P-P]ENWWEQLDVESEPNK
MSTRG.3711.1	nonsynonymous	c.C196T	p.P66S	homozygous	nonconservative	DVIAESQSM[P-S]LLGHLHPEFLK
MSTRG.3711.1	synonymous	c.A183G	p.E61E	homozygous	NA	DVIA[E-E]SQSMSLLGHLHPEFLK
MSTRG.3711.2	nonsynonymous	c.C196T	p.P66S	homozygous	nonconservative	DVIAESQSM[P-S]LLGHLHPEFLK
MSTRG.3711.2	synonymous	c.A183G	p.E61E	homozygous	NA	DVIA[E-E]SQSMSLLGHLHPEFLK
MSTRG.3718.1	nonsynonymous	c.A93T	p.R31S	homozygous	nonconservative	AVYDDIHAALTQAN[R-S]GEVESDLWSNLAK
MSTRG.3726.1	nonsynonymous	c.A1433G	p.N478S	homozygous	conservative	LLFLMHNWADVLDYS[N-S]ATMER
MSTRG.3726.1	nonsynonymous	c.G632T	p.R211M	homozygous	nonconservative	VDNSALFLE[R-M]TLQNNDK
MSTRG.3726.1	nonsynonymous	c.G835A	p.V279I	homozygous	conservative	EFLSDMACLNVLPAD[V-I]VTR
MSTRG.3772.1	nonsynonymous	c.A2130C	p.K710N	heterozygous	nonconservative	QGMLPLTFADPADYD[K-N]IDSNDK
MSTRG.3772.1	nonsynonymous	c.G2147A	p.R716K	homozygous	conservative	QGMLPLTFADPADYDNIDSND[R-K]
MSTRG.3772.1	nonsynonymous	c.G997A	p.V333I	homozygous	conservative	DLLTADDGAHYDQ[V-I]IDINLDTLIPHVNGPFTPDLASPIDK
MSTRG.3772.1	synonymous	c.G1077A	p.K359K	homozygous	NA	DLLTADDGAHYDQIIDINLDTLIPHVNGPFTPDLASPID[K-K]
MSTRG.3804.1	nonsynonymous	c.G386A	p.S129N	homozygous	conservative	HESDSFTPYWQFS[S-N]PDSSR
MSTRG.3804.1	nonsynonymous	c.T233C	p.I78T	homozygous	nonconservative	E[I-T]GDLHYVIDNTFASLSTAGCTEGLAACVH
MSTRG.3804.1	nonsynonymous	c.T62C	p.V21A	homozygous	conservative	FLLLGIDGFHIDHVSQL[V-A]VDELGK
MSTRG.3804.1	synonymous	c.A400C	p.R134R	homozygous	NA	HESDSFTPYWQFSNPDSS[R-R]
MSTRG.3804.1	synonymous	c.C393T	p.D131D	homozygous	NA	HESDSFTPYWQFSNP[D-D]SSR
MSTRG.3804.1	synonymous	c.T51C	p.V17V	homozygous	NA	FLLLGIDGFHIDH[V-V]SQLAVDELGK
MSTRG.3810.1	nonsynonymous	c.A680T	p.N227I	homozygous	nonconservative	LAADSVQCNNDNDC[N-I]TGDER
MSTRG.3810.1	nonsynonymous	c.C335T	p.A112V	homozygous	conservative	TNEDCGDEEFCDE[A-V]VNYEK
MSTRG.3810.1	nonsynonymous	c.C348G	p.D116E	homozygous	conservative	TNEDCGDEEFCDEVVNY[D-E]K
MSTRG.3810.1	synonymous	c.C696T	p.R232R	homozygous	NA	LAADSVQCNNDNDCITGDE[R-R]
MSTRG.3831.1	nonsynonymous	c.C107T	p.A36V	homozygous	conservative	SPSYCMDILPSPINPTSAEHELSG[A-V]SK
MSTRG.3831.1	nonsynonymous	c.C99A	p.F33L	homozygous	conservative	SPSYCMDILPSPINPTSAEHE[F-L]SGVSK
MSTRG.3831.1	synonymous	c.G87C	p.A29A	homozygous	NA	SPSYCMDILPSPINPTS[A-A]EHELSGVSK
MSTRG.384.1	nonsynonymous	c.G491C	p.S164T	homozygous	conservative	YYPVPYESGIA[S-T]GFQVDK
MSTRG.384.2	nonsynonymous	c.G467C	p.S156T	homozygous	conservative	YYPVPYESGIA[S-T]GFQVDK
MSTRG.3849.1	nonsynonymous	c.G124A	p.E42K	homozygous	nonconservative	VHADFVNFLYANHGEMCE[E-K]
MSTRG.386.1	nonsynonymous	c.C316G	p.Q106E	homozygous	nonconservative	SVLEF[Q-E]PAPNTYQTFTSMPDR
MSTRG.3881.1	nonsynonymous	c.A455G	p.K152R	homozygous	conservative	ISEWTNDGSILAYGLSE[K-R]
MSTRG.3887.1	nonsynonymous	c.A476G	p.D159G	homozygous	nonconservative	AAIINISSGAGSI[D-G]TNTTGSSSAGMLAYR
MSTRG.3887.1	nonsynonymous	c.T502G	p.S168A	homozygous	nonconservative	AAIINISSGAGSIGTNTTGSSS[S-A]GMLAYR
MSTRG.3887.1	nonsynonymous	c.T642G	p.N214K	homozygous	nonconservative	TMAIDLEPEHILISSFCPGWVQTDMGGS[N-K]
MSTRG.3887.1	synonymous	c.A516G	p.A172A	homozygous	NA	AAIINISSGAGSIGTNTTGSSSAGML[A-A]YR
MSTRG.3887.1	synonymous	c.A579G	p.P193P	homozygous	NA	TMAIDLE[P-P]EHILISSFCPGWVQTDMGGSK
MSTRG.3887.1	synonymous	c.T474C	p.I158I	homozygous	NA	AAIINISSGAGS[I-I]GTNTTGSSSAGMLAYR
MSTRG.3887.1	synonymous	c.T585C	p.H195H	homozygous	NA	TMAIDLEPE[H-H]ILISSFCPGWVQTDMGGSK
MSTRG.3926.1	nonsynonymous	c.C685T	p.P229S	homozygous	nonconservative	HVHLEGADVDDTGQ[P-S]YGASITFEK
MSTRG.394.1	nonsynonymous	c.A1160C	p.E387A	homozygous	nonconservative	ATQILAGLTVED[E-A]VIENIQQVTVNDVNAAAK
MSTRG.394.1	nonsynonymous	c.A435C	p.K145N	homozygous	nonconservative	DETSVGISILGHIAQPAFKPWDFEDVVPTL[K-N]VDNAYK
MSTRG.394.1	nonsynonymous	c.A435C	p.K145N	homozygous	nonconservative	IAQPAFKPWDFEDVVPTL[K-N]VDNAYK
MSTRG.394.1	nonsynonymous	c.A435C	p.K145N	homozygous	nonconservative	PWDFEDVVPTL[K-N]VDNAYK
MSTRG.394.1	nonsynonymous	c.A970G	p.I324V	homozygous	conservative	ALSGNGAASAFQAAYHDTGLAGVYI[I-V]ADSTHVSK
MSTRG.394.1	nonsynonymous	c.A970G	p.I324V	homozygous	conservative	QAAYHDTGLAGVYI[I-V]ADSTHVSK
MSTRG.394.1	nonsynonymous	c.C236T	p.A79V	homozygous	conservative	DS[A-V]NYPGLSLIWSSAVSGGR
MSTRG.394.1	nonsynonymous	c.C421G	p.L141V	homozygous	conservative	DETSVGISILGHIAQPAFKPWDFEDV[L-V]PTLNVDNAYK
MSTRG.394.1	nonsynonymous	c.C421G	p.L141V	homozygous	conservative	IAQPAFKPWDFEDV[L-V]PTLNVDNAYK
MSTRG.394.1	nonsynonymous	c.C421G	p.L141V	homozygous	conservative	PWDFEDV[L-V]PTLNVDNAYK
MSTRG.394.1	synonymous	c.G1164T	p.V388V	homozygous	NA	ATQILAGLTVEDA[V-V]IENIQQVTVNDVNAAAK
MSTRG.394.1	synonymous	c.G1215A	p.K405K	homozygous	NA	ATQILAGLTVEDAVIENIQQVTVNDVNAAA[K-K]
MSTRG.394.1	synonymous	c.T1128C	p.T376T	homozygous	NA	A[T-T]QILAGLTVEDAVIENIQQVTVNDVNAAAK
MSTRG.394.1	synonymous	c.T258C	p.L86L	homozygous	NA	DSVNYPGLS[L-L]IWSSAVSGGR
MSTRG.394.1	synonymous	c.T429G	p.T143T	homozygous	NA	DETSVGISILGHIAQPAFKPWDFEDVVP[T-T]LNVDNAYK
MSTRG.394.1	synonymous	c.T429G	p.T143T	homozygous	NA	IAQPAFKPWDFEDVVP[T-T]LNVDNAYK
MSTRG.394.1	synonymous	c.T429G	p.T143T	homozygous	NA	PWDFEDVVP[T-T]LNVDNAYK
MSTRG.394.1	synonymous	c.T957C	p.A319A	homozygous	NA	ALSGNGAASAFQAAYHDTGL[A-A]GVYIVADSTHVSK
MSTRG.394.1	synonymous	c.T957C	p.A319A	homozygous	NA	QAAYHDTGL[A-A]GVYIVADSTHVSK
MSTRG.3968.1	nonsynonymous	c.A757G	p.T253A	homozygous	nonconservative	HYGSSSYAVAADVA[T-A]IQK
MSTRG.3968.1	synonymous	c.A744G	p.A248A	homozygous	NA	HYGSSSYAV[A-A]ADVAAIQK
MSTRG.3968.1	synonymous	c.C720T	p.Y240Y	homozygous	NA	H[Y-Y]GSSSYAVAADVAAIQK
MSTRG.3968.1	synonymous	c.T735C	p.Y245Y	homozygous	NA	HYGSSS[Y-Y]AVAADVAAIQK
MSTRG.40.1	nonsynonymous	c.A4778T	p.D1593V	homozygous	nonconservative	DTVGDSPVD[D-V]NPAHVQALEPVAELPHSPAPSAK
MSTRG.40.1	nonsynonymous	c.G2564A	p.R855K	homozygous	conservative	FNGEEVAGSPWHIPVED[R-K]PER
MSTRG.40.1	nonsynonymous	c.G4696C	p.E1566Q	homozygous	nonconservative	SQESSIEI[E-Q]EPVSEIRDDVIEVVGSK
MSTRG.40.1	nonsynonymous	c.G4708T	p.A1570S	homozygous	nonconservative	SQESSIEIQEPV[A-S]EIRDDVIEVVGSK
MSTRG.40.1	nonsynonymous	c.G7277A	p.G2426E	homozygous	nonconservative	SPSG[G-E]DSVTFLPSQTGPHR
MSTRG.40.1	nonsynonymous	c.T2566C	p.S856P	homozygous	nonconservative	FNGEEVAGSPWHIPVEDK[S-P]ER
MSTRG.40.1	nonsynonymous	c.T4775A	p.V1592D	homozygous	nonconservative	DTVGDSPV[V-D]VNPAHVQALEPVAELPHSPAPSAK
MSTRG.40.1	synonymous	c.A4731C	p.I1577I	homozygous	NA	SQESSIEIQEPVSEIRDDV[I-I]EVVGSK
MSTRG.40.1	synonymous	c.G7314A	p.P2438P	homozygous	NA	SPSGEDSVTFLPSQTG[P-P]HR
MSTRG.40.1	synonymous	c.T4827C	p.H1609H	homozygous	NA	DTVGDSPVDVNPAHVQALEPVAELP[H-H]SPAPSAK
MSTRG.40.2	nonsynonymous	c.A4778T	p.D1593V	homozygous	nonconservative	DTVGDSPVD[D-V]NPAHVQALEPVAELPHSPAPSAK
MSTRG.40.2	nonsynonymous	c.G2564A	p.R855K	homozygous	conservative	FNGEEVAGSPWHIPVED[R-K]PER
MSTRG.40.2	nonsynonymous	c.G4696C	p.E1566Q	homozygous	nonconservative	SQESSIEI[E-Q]EPVSEIRDDVIEVVGSK
MSTRG.40.2	nonsynonymous	c.G4708T	p.A1570S	homozygous	nonconservative	SQESSIEIQEPV[A-S]EIRDDVIEVVGSK
MSTRG.40.2	nonsynonymous	c.G8342A	p.G2781E	homozygous	nonconservative	SPSG[G-E]DSVTFLPSQTGPHR
MSTRG.40.2	nonsynonymous	c.T2566C	p.S856P	homozygous	nonconservative	FNGEEVAGSPWHIPVEDK[S-P]ER
MSTRG.40.2	nonsynonymous	c.T4775A	p.V1592D	homozygous	nonconservative	DTVGDSPV[V-D]VNPAHVQALEPVAELPHSPAPSAK
MSTRG.40.2	synonymous	c.A4731C	p.I1577I	homozygous	NA	SQESSIEIQEPVSEIRDDV[I-I]EVVGSK
MSTRG.40.2	synonymous	c.G8379A	p.P2793P	homozygous	NA	SPSGEDSVTFLPSQTG[P-P]HR
MSTRG.40.2	synonymous	c.T4827C	p.H1609H	homozygous	NA	DTVGDSPVDVNPAHVQALEPVAELP[H-H]SPAPSAK
MSTRG.4002.1	nonsynonymous	c.G661A	p.V221I	homozygous	conservative	P[V-I]VGLMGATAGLCSVYGNTPIDVVK
MSTRG.4002.1	synonymous	c.G729A	p.V243V	homozygous	NA	PIVGLMGATAGLCSVYGNTPIDV[V-V]K
MSTRG.4025.1	nonsynonymous	c.G518A	p.R173H	homozygous	conservative	T[R-H]HNLIEVDADRK
MSTRG.4032.1	nonsynonymous	c.A440G	p.D147G	homozygous	nonconservative	TVAQGNTDEN[D-G]IIDEDTLLEPEDFVRPSGDALK
MSTRG.4032.1	nonsynonymous	c.C422G	p.A141G	homozygous	conservative	TVAQ[A-G]NTDENGIIDEDTLLEPEDFVRPSGDALK
MSTRG.4061.1	nonsynonymous	c.C515A	p.P172Q	homozygous	nonconservative	GSEE[P-Q]QMSFATHANNGK
MSTRG.4061.1	synonymous	c.G534A	p.T178T	homozygous	NA	GSEEQQMSFA[T-T]HANNGK
MSTRG.4065.1	nonsynonymous	c.G269A	p.S90N	homozygous	conservative	TCH[S-N]AAWELVDNYK
MSTRG.408.1	nonsynonymous	c.G523T	p.A175S	homozygous	nonconservative	LQPGSVVVEPEVTSE[A-S]APAPVSEPEK
MSTRG.408.1	nonsynonymous	c.G52A	p.A18T	homozygous	nonconservative	IVQEANVDEEQ[A-T]PPALPTTEPPKDDVGKPAEPEVTEAPK
MSTRG.408.1	nonsynonymous	c.T533C	p.V178A	homozygous	conservative	LQPGSVVVEPEVTSESAP[V-A]PVSEPEK
MSTRG.4149.2	nonsynonymous	c.A125G	p.K42R	homozygous	conservative	DSTDCHQYGHCVVGSDS[K-R]
MSTRG.4149.2	nonsynonymous	c.T410C	p.I137T	homozygous	nonconservative	HANAQCVYNSGSNTYVC[I-T]CK
MSTRG.4149.2	nonsynonymous	c.T410C	p.I137T	homozygous	nonconservative	LCHANAQCVYNSGSNTYVC[I-T]CK
MSTRG.4149.2	synonymous	c.C99T	p.G33G	homozygous	NA	DSTDCHQY[G-G]HCVVGSDSR
MSTRG.4149.2	synonymous	c.T84C	p.D28D	homozygous	NA	DST[D-D]CHQYGHCVVGSDSR
MSTRG.416.1	nonsynonymous	c.A601G	p.K201E	homozygous	nonconservative	SNDYYE[K-E]NHISIITNTR
MSTRG.416.1	nonsynonymous	c.T1439C	p.F480S	homozygous	nonconservative	TIVHG[F-S]VDDLDFVK
MSTRG.416.1	synonymous	c.C1443T	p.V481V	homozygous	NA	TIVHGS[V-V]DDLDFVK
MSTRG.4192.1	nonsynonymous	c.A1069G	p.N357D	homozygous	nonconservative	ELTEDSLVDVENQL[N-D]NLR
MSTRG.4192.1	nonsynonymous	c.A256G	p.I86V	homozygous	conservative	CNNA[I-V]AVLHDAPK
MSTRG.4192.1	nonsynonymous	c.C1802A	p.A601E	homozygous	nonconservative	DVEDLSTMLATID[A-E]IPQEDLSPR
MSTRG.4192.1	nonsynonymous	c.G1826C	p.R609P	homozygous	nonconservative	DVEDLSTMLATIDEIPQEDLS[R-P]R
MSTRG.4192.1	nonsynonymous	c.G2076C	p.Q692H	homozygous	nonconservative	GIADSC[Q-H]EFAMSLSPIASHDDLDK
MSTRG.4192.1	nonsynonymous	c.G2076C	p.Q692H	homozygous	nonconservative	IADSC[Q-H]EFAMSLSPIASHDDLDK
MSTRG.4192.1	nonsynonymous	c.G2245T	p.V749L	homozygous	conservative	LNMVTPEILQISES[V-L]QQQSDEIPHNLSEQQAVLVDLESK
MSTRG.4192.1	nonsynonymous	c.G2268A	p.M756I	homozygous	conservative	LNMVTPEILQISESLQQQSDE[M-I]PHNLSEQQAVLVDLESK
MSTRG.4192.1	nonsynonymous	c.T2079A	p.D693E	homozygous	conservative	GIADSCH[D-E]FAMSLSPIASHDDLDK
MSTRG.4192.1	nonsynonymous	c.T2079A	p.D693E	homozygous	conservative	IADSCH[D-E]FAMSLSPIASHDDLDK
MSTRG.4192.1	nonsynonymous	c.T320C	p.L107S	homozygous	nonconservative	NHPSVEDLNVAL[L-S]SAENIIPILEER
MSTRG.4192.1	nonsynonymous	c.T742A	p.L248M	homozygous	conservative	LCDSVDHFITEMNSICNI[L-M]AEQPTR
MSTRG.4192.1	nonsynonymous	c.T742A	p.L248M	homozygous	conservative	RLCDSVDHFITEMNSICNI[L-M]AEQPTR
MSTRG.4192.1	synonymous	c.C1053T	p.D351D	homozygous	NA	ELTEDSLV[D-D]VENQLDNLR
MSTRG.4192.1	synonymous	c.G750A	p.E250E	homozygous	NA	LCDSVDHFITEMNSICNIMA[E-E]QPTR
MSTRG.4192.1	synonymous	c.G750A	p.E250E	homozygous	NA	RLCDSVDHFITEMNSICNIMA[E-E]QPTR
MSTRG.4192.1	synonymous	c.T1077A	p.L359L	homozygous	NA	ELTEDSLVDVENQLDN[L-L]R
MSTRG.4265.1	nonsynonymous	c.A808G	p.M270V	homozygous	conservative	ELEE[M-V]EAALEQQQADLTSAEDAK
MSTRG.4265.1	nonsynonymous	c.C807A	p.D269E	homozygous	conservative	ELE[D-E]VEAALEQQQADLTSAEDAK
MSTRG.4265.1	nonsynonymous	c.T818C	p.V273A	homozygous	conservative	ELEEVEA[V-A]LEQQQADLTSAEDAK
MSTRG.4265.1	synonymous	c.T849C	p.S283S	homozygous	NA	ELEEVEAALEQQQADLT[S-S]AEDAK
MSTRG.4301.3	nonsynonymous	c.A340G	p.I114V	homozygous	conservative	DGDS[I-V]SIQDTEGKPQENLALLAAAEQMALDK
MSTRG.4301.3	synonymous	c.C388T	p.L130L	homozygous	NA	DGDSVSIQDTEGKPQENLAL[L-L]AAAEQMALDK
MSTRG.431.1	nonsynonymous	c.A994G	p.T332A	homozygous	nonconservative	[T-A]GNNSDLVISTSGPIEYDGSDTSAQHR
MSTRG.431.1	nonsynonymous	c.T1012C	p.F338L	homozygous	conservative	AGNNSD[F-L]VISTSGPIEYDGSDTSAQHR
MSTRG.431.1	synonymous	c.T1062C	p.S354S	homozygous	NA	AGNNSDLVISTSGPIEYDGSDT[S-S]AQHR
MSTRG.4312.1	nonsynonymous	c.C1089A	p.D363E	homozygous	conservative	MAELQL[D-E]QIDQVVLMGAGTR
MSTRG.4312.1	nonsynonymous	c.G260A	p.S87N	homozygous	conservative	HPA[S-N]VYGHLLDLVAK
MSTRG.4312.1	nonsynonymous	c.G584A	p.S195N	homozygous	conservative	LNLLQLI[S-N]DGTAAGLNYGMFR
MSTRG.4312.1	nonsynonymous	c.T1808C	p.F603S	homozygous	nonconservative	DNGIGEAVNDAES[F-S]QSTDK
MSTRG.4312.1	synonymous	c.A1083G	p.Q361Q	homozygous	NA	MAEL[Q-Q]LEQIDQVVLMGAGTR
MSTRG.4312.1	synonymous	c.G624C	p.R208R	homozygous	NA	LNLLQLINDGTAAGLNYGMF[R-R]
MSTRG.4326.2	nonsynonymous	c.C422T	p.A141V	homozygous	conservative	VTDDISSHQ[A-V]STLSTSTAVPPTSTAGSSIVQFK
MSTRG.4326.2	nonsynonymous	c.C787G	p.P263A	homozygous	conservative	LLQPSAG[P-A]STSESLGHIASGK
MSTRG.4326.2	nonsynonymous	c.G407T	p.S136I	homozygous	nonconservative	VTDD[S-I]SSHQVSTLSTSTAVPPTSTAGSSIVQFK
MSTRG.4326.2	nonsynonymous	c.T413C	p.F138S	homozygous	nonconservative	VTDDIS[F-S]HQVSTLSTSTAVPPTSTAGSSIVQFK
MSTRG.4326.2	synonymous	c.C468T	p.A156A	homozygous	NA	VTDDISSHQVSTLSTSTAVPPTST[A-A]GSSIVQFK
MSTRG.4326.2	synonymous	c.T769C	p.L257L	homozygous	NA	L[L-L]QPSAGASTSESLGHIASGK
MSTRG.436.1	nonsynonymous	c.A226G	p.I76V	homozygous	conservative	FAGDAGQGGMPNVDDF[I-V]K
MSTRG.436.1	nonsynonymous	c.G275A	p.S92N	homozygous	conservative	DPEIM[S-N]AFMDIVANPSNLMK
MSTRG.436.1	synonymous	c.T180C	p.F60F	homozygous	NA	[F-F]AGDAGQGGMPNVDDFVK
MSTRG.436.1	synonymous	c.T303G	p.P101P	homozygous	NA	DPEIMNAFMDIVAN[P-P]SNLMK
MSTRG.4364.1	nonsynonymous	c.C1123G	p.L375V	homozygous	conservative	PATTVLDTHPAILFSDYLFEADTVEDAQSNFDELLG[L-V]K
MSTRG.4364.1	synonymous	c.C1119T	p.L373L	homozygous	NA	PATTVLDTHPAILFSDYLFEADTVEDAQSNFDEL[L-L]GVK
MSTRG.4423.1	nonsynonymous	c.C1019G	p.T340S	homozygous	conservative	IQWINHQGLGGVGLSSLQLDDP[T-S]DR
MSTRG.4423.1	nonsynonymous	c.G811A	p.G271S	homozygous	nonconservative	NPNSAVHGDIATEA[G-S]TR
MSTRG.4423.1	nonsynonymous	c.T957A	p.H319Q	homozygous	nonconservative	I[H-Q]WINHQGLGGVGLSSLQLDDPSDR
MSTRG.4423.1	synonymous	c.G993C	p.L331L	homozygous	NA	IQWINHQGLGGVG[L-L]SSLQLDDPSDR
MSTRG.445.1	nonsynonymous	c.A4057G	p.I1353V	homozygous	conservative	[I-V]SAKPEFQQICSDMK
MSTRG.445.1	nonsynonymous	c.G4159A	p.V1387I	homozygous	conservative	GIHGEHSESAEGIYD[V-I]SNK
MSTRG.445.1	synonymous	c.A4137G	p.E1379E	homozygous	NA	GIHGEHS[E-E]SAEGIYDISNK
MSTRG.446.1	nonsynonymous	c.T641C	p.V214A	homozygous	conservative	PI[V-A]INPILAVPSDIFIR
MSTRG.446.1	synonymous	c.C655T	p.L219L	homozygous	NA	PIAINPI[L-L]AVPSDIFIR
MSTRG.448.1	nonsynonymous	c.A529G	p.T177A	homozygous	nonconservative	PYLSEVP[T-A]SESPDDYLR
MSTRG.448.1	nonsynonymous	c.G46A	p.G16S	homozygous	nonconservative	TS[G-S]AENSPALQASHIIVSHGETVAEVFPQWLR
MSTRG.448.1	synonymous	c.G558A	p.R186R	homozygous	NA	PYLSEVPASESPDDYL[R-R]
MSTRG.4480.1	nonsynonymous	c.T515C	p.M172T	homozygous	nonconservative	MELPDSDEFFNE[M-T]LSDAGNPER
MSTRG.4480.1	synonymous	c.C510T	p.N170N	homozygous	NA	MELPDSDEFF[N-N]ETLSDAGNPER
MSTRG.4494.1	nonsynonymous	c.G745C	p.E249Q	homozygous	nonconservative	[E-Q]LIGCWESHDDDQFQNLLK
MSTRG.4500.1	nonsynonymous	c.C782A	p.P261Q	homozygous	nonconservative	YGVAPDSVET[P-Q]SYDLLLK
MSTRG.4500.1	synonymous	c.T796C	p.L266L	homozygous	NA	YGVAPDSVETQSYDL[L-L]LK
MSTRG.451.1	nonsynonymous	c.A733G	p.K245E	homozygous	nonconservative	NPYS[K-E]LGGEITLGGMDLR
MSTRG.451.1	nonsynonymous	c.C770T	p.S257L	homozygous	nonconservative	NPYSELGGEITLGGMD[S-L]R
MSTRG.451.1	nonsynonymous	c.G1046A	p.S349N	homozygous	conservative	VPSLPDISFVIE[S-N]NEFVLK
MSTRG.451.1	synonymous	c.C1017T	p.S339S	homozygous	NA	VP[S-S]LPDISFVIENNEFVLK
MSTRG.451.1	synonymous	c.C726T	p.P242P	homozygous	NA	N[P-P]YSELGGEITLGGMDLR
MSTRG.451.1	synonymous	c.T759C	p.G253G	homozygous	NA	NPYSELGGEITL[G-G]GMDLR
MSTRG.4522.1	nonsynonymous	c.G365T	p.G122V	homozygous	conservative	GLGTDE[G-V]VLIEILCSR
MSTRG.4531.1	nonsynonymous	c.G2224T	p.A742S	homozygous	nonconservative	E[A-S]LADQSSQVTDFIDGR
MSTRG.4531.1	nonsynonymous	c.G2227C	p.V743L	heterozygous	conservative	ES[V-L]ADQSSQVTDFIDGR
MSTRG.4531.1	synonymous	c.G2238A	p.Q746Q	homozygous	NA	ESLAD[Q-Q]SSQVTDFIDGR
MSTRG.4544.1	nonsynonymous	c.A49G	p.K17E	homozygous	nonconservative	KPGNEETAG[K-E]DAVK
MSTRG.4544.1	nonsynonymous	c.A55G	p.T19A	homozygous	nonconservative	KPGNEETAGED[T-A]VK
MSTRG.4560.1	nonsynonymous	c.A854G	p.K285R	homozygous	conservative	SVLIGSCDTFLPNNVELWS[K-R]
MSTRG.4560.1	synonymous	c.A813G	p.S271S	homozygous	NA	SVLIG[S-S]CDTFLPNNVELWSR
MSTRG.4560.1	synonymous	c.C826T	p.L276L	homozygous	NA	SVLIGSCDTF[L-L]PNNVELWSR
MSTRG.4563.3	nonsynonymous	c.A1172G	p.E391G	homozygous	nonconservative	GITDETTLPVSTPVVEAFEVFVDEELRQPDS[E-G]AK
MSTRG.4563.3	synonymous	c.A1128G	p.A376A	homozygous	NA	GITDETTLPVSTPVVE[A-A]FEVFVDEELRQPDSGAK
MSTRG.4563.3	synonymous	c.G1149A	p.E383E	homozygous	NA	GITDETTLPVSTPVVEAFEVFVD[E-E]ELRQPDSGAK
MSTRG.4566.1	nonsynonymous	c.A592T	p.M198L	homozygous	conservative	SPDSQ[M-L]EPVMSIILQTLASK
MSTRG.4566.1	nonsynonymous	c.C332T	p.A111V	homozygous	conservative	TTDDELDEIM[A-V]EQDQAAAQK
MSTRG.4566.1	nonsynonymous	c.C590A	p.P197Q	homozygous	nonconservative	SPDS[P-Q]LEPVMSIILQTLASK
MSTRG.458.1	nonsynonymous	c.A1408G	p.T470A	homozygous	nonconservative	LVAHVYTNIMHST[T-A]GGDR
MSTRG.458.1	nonsynonymous	c.C1019T	p.A340V	homozygous	conservative	DLTCVSEPASH[A-V]EMLNLGSVVSK
MSTRG.458.1	nonsynonymous	c.C1421G	p.P474R	homozygous	nonconservative	LVAHVYTNIMHSTAGGD[P-R]
MSTRG.458.1	nonsynonymous	c.T1040C	p.L347S	homozygous	nonconservative	DLTCVSEPASHVEMLNLG[L-S]VVSK
MSTRG.4585.2	nonsynonymous	c.A160G	p.N54D	homozygous	nonconservative	[N-D]HAVSSLNATFITCFVGAR
MSTRG.4585.2	nonsynonymous	c.G165C	p.Q55H	homozygous	nonconservative	D[Q-H]AVSSLNATFITCFVGAR
MSTRG.4585.2	synonymous	c.G210A	p.G70G	homozygous	NA	DHAVSSLNATFITCFV[G-G]AR
MSTRG.4589.1	nonsynonymous	c.A4010T	p.Y1337F	homozygous	nonconservative	RETTVSSDSNT[Y-F]YYK
MSTRG.4589.1	nonsynonymous	c.C3981A	p.D1327E	homozygous	conservative	R[D-E]TTVSSDSNTFYYK
MSTRG.4589.1	nonsynonymous	c.G3843C	p.R1281S	homozygous	nonconservative	[R-S]GDGNIFVLQHNPDVEQK
MSTRG.4589.1	nonsynonymous	c.G4508C	p.S1503T	homozygous	conservative	IAIEYHNDPTAFNV[S-T]TDCSPGFLYR
MSTRG.4589.1	nonsynonymous	c.T3416G	p.V1139G	homozygous	conservative	IADND[V-G]ELDLATTPAVFIAK
MSTRG.4589.1	nonsynonymous	c.T4405G	p.L1469V	homozygous	conservative	SEE[L-V]LEIPVTSQEFLFYLHR
MSTRG.4589.1	synonymous	c.C3885T	p.V1295V	homozygous	NA	SGDGNIFVLQHNPD[V-V]EQK
MSTRG.4589.1	synonymous	c.C4530T	p.F1510F	homozygous	NA	IAIEYHNDPTAFNVTTDCSPG[F-F]LYR
MSTRG.4589.1	synonymous	c.T4533G	p.L1511L	heterozygous	NA	IAIEYHNDPTAFNVTTDCSPGF[L-L]YR
MSTRG.4602.2	nonsynonymous	c.C338T	p.P113L	homozygous	conservative	LQHQTDDFVNQMLEQQDPEYDDPD[P-L]EGPSPIFESDEK
MSTRG.4605.2	nonsynonymous	c.A1492G	p.I498V	homozygous	conservative	VFFYNPDA[I-V]AGSAPGVEGVQR
MSTRG.4605.2	nonsynonymous	c.A1579G	p.T527A	homozygous	nonconservative	SVLNSGVNVDKPTSDA[T-A]PAQPPPVATIETSK
MSTRG.4605.2	nonsynonymous	c.A1597C	p.T533P	homozygous	nonconservative	SVLNSGVNVDKPTSDAAPAQPP[T-P]VATIETSK
MSTRG.4625.1	nonsynonymous	c.A2173G	p.M725V	homozygous	conservative	FGELGFSQQNVDEV[M-V]SK
MSTRG.4625.1	nonsynonymous	c.A2173G	p.M725V	homozygous	conservative	KDFLASLDTMFGGEWYKYFGELGFSQQNVDEV[M-V]SK
MSTRG.4625.1	nonsynonymous	c.A2173G	p.M725V	homozygous	conservative	YFGELGFSQQNVDEV[M-V]SK
MSTRG.4625.1	nonsynonymous	c.A2173G	p.M725V	homozygous	conservative	YFGELGFSQQNVDEV[M-V]SKFLHK
MSTRG.4625.1	nonsynonymous	c.A3211G	p.N1071D	homozygous	nonconservative	NN[N-D]EFFELDVDDFEPK
MSTRG.4625.1	nonsynonymous	c.A3806C	p.N1269T	homozygous	conservative	[N-T]LQKWDTEYEMVNNQEGLLR
MSTRG.4625.1	nonsynonymous	c.A543G	p.I181M	homozygous	conservative	[I-M]LEGECEVEYTINDMPAEQK
MSTRG.4625.1	nonsynonymous	c.A589G	p.T197A	homozygous	nonconservative	MLEGECEVEYTINDMP[T-A]EQK
MSTRG.4625.1	nonsynonymous	c.G1339C	p.E447Q	homozygous	nonconservative	MAE[E-Q]VLSVCESEVAEK
MSTRG.4625.1	nonsynonymous	c.G3150A	p.M1050I	homozygous	conservative	EYVLSME[M-I]ETFVPEIIEKPTLEK
MSTRG.4625.1	nonsynonymous	c.G4364A	p.G1455D	homozygous	nonconservative	IHENLYEI[G-D]IGDVSVTFDGFQAN
MSTRG.4625.1	nonsynonymous	c.G4364A	p.G1455D	homozygous	nonconservative	IHENLYEI[G-D]IGDVSVTFDGFQANIK
MSTRG.4625.1	nonsynonymous	c.G931C	p.V311L	homozygous	conservative	ESLIYNSEAE[V-L]AEEKFAMTGDER
MSTRG.4625.1	nonsynonymous	c.T1349C	p.F450S	homozygous	nonconservative	MAEQVL[F-S]VCESEVAEK
MSTRG.4625.1	nonsynonymous	c.T2095C	p.F699L	homozygous	conservative	KDFLAS[F-L]DTMFGGEWYKYFGELGFSQQNVDEVVSK
MSTRG.4625.1	nonsynonymous	c.T4277C	p.V1426A	homozygous	conservative	ENIYEIEMLGNEL[V-A]CK
MSTRG.4625.1	nonsynonymous	c.T4277C	p.V1426A	homozygous	conservative	LINRENIYEIEMLGNEL[V-A]CK
MSTRG.4625.1	synonymous	c.A3825C	p.T1275T	homozygous	NA	TLQKWD[T-T]EYEMVNNQEGLLR
MSTRG.4625.1	synonymous	c.A552C	p.G184G	homozygous	NA	MLE[G-G]ECEVEYTINDMPAEQK
MSTRG.4625.1	synonymous	c.C2103T	p.T701T	homozygous	NA	KDFLASLD[T-T]MFGGEWYKYFGELGFSQQNVDEVVSK
MSTRG.4625.1	synonymous	c.C3132T	p.Y1044Y	homozygous	NA	E[Y-Y]VLSMEIETFVPEIIEKPTLEK
MSTRG.4625.1	synonymous	c.C3226T	p.L1076L	homozygous	NA	NNDEFFE[L-L]DVDDFEPK
MSTRG.4625.1	synonymous	c.G3849A	p.Q1283Q	homozygous	NA	TLQKWDTEYEMVNN[Q-Q]EGLLR
MSTRG.4625.1	synonymous	c.T4344C	p.H1448H	homozygous	NA	I[H-H]ENLYEIDIGDVSVTFDGFQAN
MSTRG.4625.1	synonymous	c.T4344C	p.H1448H	homozygous	NA	I[H-H]ENLYEIDIGDVSVTFDGFQANIK
MSTRG.4630.1	nonsynonymous	c.A184G	p.N62D	homozygous	nonconservative	SGAVDTEIEFATD[N-D]ECK
MSTRG.4630.1	nonsynonymous	c.C163G	p.Q55E	homozygous	nonconservative	SGAVDT[Q-E]IEFATDDECK
MSTRG.4636.2	nonsynonymous	c.A446T	p.Y149F	homozygous	nonconservative	EASDIQP[Y-F]PAESTALESWR
MSTRG.4638.1	nonsynonymous	c.G511A	p.V171I	homozygous	conservative	NLGED[V-I]IDTDVPTEWEAR
MSTRG.4638.1	synonymous	c.T546C	p.A182A	homozygous	NA	NLGEDIIDTDVPTEWE[A-A]R
MSTRG.4643.2	synonymous	c.A3378C	p.T1126T	homozygous	NA	DQVRPETYGIASTSYDGPLEVT[T-T]R
MSTRG.4643.2	synonymous	c.C1077T	p.P359P	homozygous	NA	EQFVGAHVS[P-P]LHYADNELGSYEPMPSPAACYDISGQR
MSTRG.4643.2	synonymous	c.T1134G	p.A378A	homozygous	NA	EQFVGAHVSPLHYADNELGSYEPMPSPA[A-A]CYDISGQR
MSTRG.4643.3	synonymous	c.A3378C	p.T1126T	homozygous	NA	DQVRPETYGIASTSYDGPLEVT[T-T]R
MSTRG.4643.3	synonymous	c.C1077T	p.P359P	homozygous	NA	EQFVGAHVS[P-P]LHYADNELGSYEPMPSPAACYDISGQR
MSTRG.4643.3	synonymous	c.T1134G	p.A378A	homozygous	NA	EQFVGAHVSPLHYADNELGSYEPMPSPA[A-A]CYDISGQR
MSTRG.4672.1	nonsynonymous	c.G7316A	p.G2439D	homozygous	nonconservative	AQI[G-D]LPSSSIEHIFDSSPNTR
MSTRG.4672.1	synonymous	c.T7329C	p.S2443S	homozygous	NA	AQIDLPS[S-S]SIEHIFDSSPNTR
MSTRG.4676.1	nonsynonymous	c.A1015G	p.T339A	homozygous	nonconservative	PSVD[T-A]VMENVALIVPEIDYPIVFK
MSTRG.4676.1	nonsynonymous	c.G1205C	p.G402A	homozygous	conservative	TVLD[G-A]LETHSAPVYFYSFDYYNPK
MSTRG.4676.1	synonymous	c.T1053C	p.I351I	homozygous	NA	PSVDAVMENVALIVPE[I-I]DYPIVFK
MSTRG.4679.1	nonsynonymous	c.C1552G	p.Q518E	homozygous	nonconservative	SFIDMENMFDLMN[Q-E]EVDVVDSPNAIDYHPTGGK
MSTRG.4679.1	synonymous	c.T1566C	p.V522V	homozygous	NA	SFIDMENMFDLMNEEVD[V-V]VDSPNAIDYHPTGGK
MSTRG.4680.1	nonsynonymous	c.T1280C	p.F427S	homozygous	nonconservative	NANISTNKPEL[F-S]SESSNVIASVTGTSVNFGK
MSTRG.4687.1	nonsynonymous	c.A331G	p.S111G	homozygous	nonconservative	GSQG[S-G]GYNDGGFGGGGYNDGGFGGGGR
MSTRG.4687.1	nonsynonymous	c.G326A	p.R109Q	homozygous	nonconservative	GS[R-Q]GGGYNDGGFGGGGYNDGGFGGGGR
MSTRG.4688.2	synonymous	c.A1692G	p.Q564Q	homozygous	NA	MRPDE[Q-Q]GGQSTNAEYPK
MSTRG.4690.1	nonsynonymous	c.G296A	p.R99K	homozygous	conservative	TLSTELEALDLDCANQLMN[R-K]
MSTRG.4690.1	nonsynonymous	c.T259G	p.S87A	homozygous	nonconservative	TLSTELE[S-A]LDLDCANQLMNK
MSTRG.4690.1	nonsynonymous	c.T289A	p.L97M	homozygous	conservative	TLSTELEALDLDCANQL[L-M]NK
MSTRG.4690.1	synonymous	c.A252G	p.E84E	homozygous	NA	TLST[E-E]LEALDLDCANQLMNK
MSTRG.4709.1	nonsynonymous	c.A706G	p.N236D	homozygous	nonconservative	VVVLG[N-D]SIALDQAHEFTSSVHYLNLSYK
MSTRG.4709.1	synonymous	c.A699G	p.V233V	homozygous	NA	VV[V-V]LGDSIALDQAHEFTSSVHYLNLSYK
MSTRG.4710.1	nonsynonymous	c.G2839A	p.V947I	homozygous	conservative	IVPVDHLELQDPSEMTSVAGS[V-I]R
MSTRG.4710.1	synonymous	c.A2823T	p.T941T	homozygous	NA	IVPVDHLELQDPSEM[T-T]SVAGSIR
MSTRG.4710.1	synonymous	c.A2826C	p.S942S	homozygous	NA	IVPVDHLELQDPSEMT[S-S]VAGSIR
MSTRG.4713.1	nonsynonymous	c.A1387T	p.S463C	homozygous	conservative	AYGDLLQSMWSGEN[S-C]SVVPR
MSTRG.4713.1	synonymous	c.C1386T	p.N462N	homozygous	NA	AYGDLLQSMWSGE[N-N]CSVVPR
MSTRG.4713.2	nonsynonymous	c.A1495T	p.S499C	homozygous	conservative	AYGDLLQSMWSGEN[S-C]SVVPR
MSTRG.4713.2	synonymous	c.C1494T	p.N498N	homozygous	NA	AYGDLLQSMWSGE[N-N]CSVVPR
MSTRG.4714.1	nonsynonymous	c.A244G	p.I82V	homozygous	conservative	GN[I-V]LLHAYEQSGNDEIK
MSTRG.4714.1	nonsynonymous	c.A244G	p.I82V	homozygous	conservative	GN[I-V]LLHAYEQSGNDEIKK
MSTRG.4714.1	nonsynonymous	c.G274A	p.D92N	homozygous	nonconservative	GNVLLHAYEQSG[D-N]DEIK
MSTRG.4714.1	nonsynonymous	c.G274A	p.D92N	homozygous	nonconservative	GNVLLHAYEQSG[D-N]DEIKK
MSTRG.4714.2	nonsynonymous	c.A244G	p.I82V	homozygous	conservative	GN[I-V]LLHAYEQSGNDEIK
MSTRG.4714.2	nonsynonymous	c.A244G	p.I82V	homozygous	conservative	GN[I-V]LLHAYEQSGNDEIKK
MSTRG.4714.2	nonsynonymous	c.G274A	p.D92N	homozygous	nonconservative	GNVLLHAYEQSG[D-N]DEIK
MSTRG.4714.2	nonsynonymous	c.G274A	p.D92N	homozygous	nonconservative	GNVLLHAYEQSG[D-N]DEIKK
MSTRG.4717.1	nonsynonymous	c.A1249G	p.T417A	homozygous	nonconservative	HLGLGELSQT[T-A]VDSNDVNEVSSAADGLEK
MSTRG.4717.1	nonsynonymous	c.A1534T	p.S512C	homozygous	conservative	DSAA[S-C]HNLSAVNASLFELVNR
MSTRG.4717.1	nonsynonymous	c.A2248G	p.I750V	homozygous	conservative	ASLEGQLSLSEQ[I-V]QQDVLNLR
MSTRG.4717.1	nonsynonymous	c.A2653G	p.S885G	homozygous	nonconservative	ENNLLIAEVVSEYASNE[S-G]QDK
MSTRG.4717.1	nonsynonymous	c.G1571A	p.G524E	homozygous	nonconservative	DSAACHNLSAVNASLF[G-E]LVNR
MSTRG.4717.1	nonsynonymous	c.T2821A	p.L941M	homozygous	conservative	AALANMESDFLSHSSEVD[L-M]LR
MSTRG.4717.1	synonymous	c.A2217G	p.S739S	homozygous	NA	A[S-S]LEGQLSLSEQVQQDVLNLR
MSTRG.4717.1	synonymous	c.A2631C	p.V877V	homozygous	NA	ENNLLIAEV[V-V]SEYASNEGQDK
MSTRG.4717.1	synonymous	c.C1272T	p.N424N	homozygous	NA	HLGLGELSQTAVDSNDV[N-N]EVSSAADGLEK
MSTRG.4717.1	synonymous	c.G1296A	p.G432G	homozygous	NA	HLGLGELSQTAVDSNDVNEVSSAAD[G-G]LEK
MSTRG.4717.1	synonymous	c.T2799C	p.L933L	homozygous	NA	AALANMESDF[L-L]SHSSEVDMLR
MSTRG.4717.1	synonymous	c.T2817C	p.V939V	homozygous	NA	AALANMESDFLSHSSE[V-V]DMLR
MSTRG.4717.1	synonymous	c.T2820C	p.D940D	homozygous	NA	AALANMESDFLSHSSEV[D-D]MLR
MSTRG.4726.1	nonsynonymous	c.G1310T	p.C437F	homozygous	nonconservative	DNLVLPIDDYLFSM[C-F]NHSHPPISER
MSTRG.4726.1	nonsynonymous	c.T1334C	p.L445S	homozygous	nonconservative	DNLVLPIDDYLFSMFNHSHPPI[L-S]ER
MSTRG.4726.1	synonymous	c.T1275C	p.L425L	homozygous	NA	DN[L-L]VLPIDDYLFSMFNHSHPPISER
MSTRG.4726.1	synonymous	c.T1317C	p.H439H	homozygous	NA	DNLVLPIDDYLFSMFN[H-H]SHPPISER
MSTRG.4737.1	nonsynonymous	c.C858A	p.H286Q	homozygous	nonconservative	[H-Q]ADVLPAVTTATHSITVTNEQDPAANQR
MSTRG.4737.2	nonsynonymous	c.C858A	p.H286Q	homozygous	nonconservative	[H-Q]ADVLPAVTTATHSITVTNEQDPAANQR
MSTRG.4739.1	nonsynonymous	c.A2221G	p.T741A	homozygous	nonconservative	[T-A]IHMIALNTPYDGNMHGMR
MSTRG.4739.1	nonsynonymous	c.G1795A	p.G599S	homozygous	nonconservative	PSHQISEGT[G-S]SAVR
MSTRG.4739.1	synonymous	c.C1776T	p.H592H	homozygous	NA	PS[H-H]QISEGTSSAVR
MSTRG.4739.4	nonsynonymous	c.A1645G	p.T549A	homozygous	nonconservative	[T-A]IHMIALNTPYDGNMHGMR
MSTRG.4739.4	nonsynonymous	c.G1273A	p.G425S	homozygous	nonconservative	PSHQISEGT[G-S]SAVR
MSTRG.4739.4	synonymous	c.C1254T	p.H418H	homozygous	NA	PS[H-H]QISEGTSSAVR
MSTRG.4739.5	nonsynonymous	c.A1570G	p.T524A	homozygous	nonconservative	[T-A]IHMIALNTPYDGNMHGMR
MSTRG.4739.5	nonsynonymous	c.G1144A	p.G382S	homozygous	nonconservative	PSHQISEGT[G-S]SAVR
MSTRG.4739.5	synonymous	c.C1125T	p.H375H	homozygous	NA	PS[H-H]QISEGTSSAVR
MSTRG.4739.6	nonsynonymous	c.A1699G	p.T567A	homozygous	nonconservative	[T-A]IHMIALNTPYDGNMHGMR
MSTRG.4739.6	nonsynonymous	c.G1273A	p.G425S	homozygous	nonconservative	PSHQISEGT[G-S]SAVR
MSTRG.4739.6	synonymous	c.C1254T	p.H418H	homozygous	NA	PS[H-H]QISEGTSSAVR
MSTRG.4749.3	nonsynonymous	c.C148T	p.H50Y	homozygous	nonconservative	GLAVENPTAVEI[H-Y]DVLAANGLNPVLER
MSTRG.4749.4	nonsynonymous	c.C148T	p.H50Y	homozygous	nonconservative	GLAVENPTAVEI[H-Y]DVLAANGLNPVLER
MSTRG.4750.1	nonsynonymous	c.A3085T	p.M1029L	homozygous	conservative	A[M-L]IDTPTTSMSTSSSTDSSK
MSTRG.4750.1	synonymous	c.G3096A	p.T1032T	homozygous	NA	ALID[T-T]PTTSMSTSSSTDSSK
MSTRG.4750.2	nonsynonymous	c.A3085T	p.M1029L	homozygous	conservative	A[M-L]IDTPTTSMSTSSSTDSSK
MSTRG.4750.2	synonymous	c.G3096A	p.T1032T	homozygous	NA	ALID[T-T]PTTSMSTSSSTDSSK
MSTRG.4751.1	nonsynonymous	c.G2027A	p.S676N	homozygous	conservative	LAALSLEPDRPIMAP[S-N]TAAGTFGTPFNVQTNVFGVK
MSTRG.4751.1	synonymous	c.A2049T	p.G683G	homozygous	NA	LAALSLEPDRPIMAPNTAAGTF[G-G]TPFNVQTNVFGVK
MSTRG.4751.2	nonsynonymous	c.G2045A	p.S682N	homozygous	conservative	LAALSLEPDRPIMAP[S-N]TAAGTFGTPFNVQTNVFGVK
MSTRG.4751.2	synonymous	c.A2067T	p.G689G	homozygous	NA	LAALSLEPDRPIMAPNTAAGTF[G-G]TPFNVQTNVFGVK
MSTRG.477.1	nonsynonymous	c.A1003G	p.T335A	heterozygous	nonconservative	LVFTATSAGYWELSDVEVHNVIVEPISESGHNFISHS[T-A]K
MSTRG.477.1	nonsynonymous	c.G1000T	p.A334S	heterozygous	nonconservative	LVFTATSAGYWELSDVEVHNVIVEPISESGHNFISH[A-S]AK
MSTRG.477.1	synonymous	c.A993C	p.I331I	homozygous	NA	LVFTATSAGYWELSDVEVHNVIVEPISESGHNF[I-I]SHSAK
MSTRG.477.1	synonymous	c.C987T	p.N329N	homozygous	NA	LVFTATSAGYWELSDVEVHNVIVEPISESGH[N-N]FISHSAK
MSTRG.4783.1	nonsynonymous	c.A2368T	p.S790C	homozygous	conservative	ETMQHLESL[S-C]GSLEGLSSDIK
MSTRG.4783.1	nonsynonymous	c.G2347A	p.V783M	homozygous	conservative	ET[V-M]QHLESLCGSLEGLSSDIK
MSTRG.4783.1	synonymous	c.A2358G	p.L786L	homozygous	NA	ETMQH[L-L]ESLCGSLEGLSSDIK
MSTRG.4796.1	nonsynonymous	c.G1105A	p.D369N	homozygous	nonconservative	PIASLDHFLPEALGTADLVEEIPCGG[D-N]ER
MSTRG.4796.1	synonymous	c.C1051T	p.L351L	homozygous	NA	PIASLDHF[L-L]PEALGTADLVEEIPCGGNER
MSTRG.4796.1	synonymous	c.G1038A	p.S346S	homozygous	NA	PIA[S-S]LDHFLPEALGTADLVEEIPCGGNER
MSTRG.4796.1	synonymous	c.T1104C	p.G368G	homozygous	NA	PIASLDHFLPEALGTADLVEEIPCG[G-G]NER
MSTRG.4806.1	nonsynonymous	c.C559T	p.L187F	homozygous	conservative	HGQFESYIYN[L-F]GSETYVVCYGR
MSTRG.481.1	nonsynonymous	c.T2955G	p.H985Q	homozygous	nonconservative	RPSA[H-Q]SGISQNSTGGK
MSTRG.481.1	synonymous	c.A2943G	p.R981R	homozygous	NA	[R-R]PSAQSGISQNSTGGK
MSTRG.481.1	synonymous	c.G2985T	p.G995G	homozygous	NA	RPSAQSGISQNSTG[G-G]K
MSTRG.4827.1	nonsynonymous	c.G122A	p.R41Q	homozygous	nonconservative	ILNVSEMFSQESIQAL[R-Q]QSNPPLYR
MSTRG.4827.1	synonymous	c.C111T	p.I37I	homozygous	NA	ILNVSEMFSQES[I-I]QALQQSNPPLYR
MSTRG.4835.1	nonsynonymous	c.A235G	p.K79E	homozygous	nonconservative	YLAWHEGTQVYITDADLLA[K-E]IAR
MSTRG.4835.1	nonsynonymous	c.G211A	p.V71I	homozygous	conservative	YLAWHEGTQVY[V-I]TDADLLAEIAR
MSTRG.4849.1	nonsynonymous	c.A3247G	p.I1083V	homozygous	conservative	TAQGNISIADVASDGSFITVENTS[I-V]SHDEK
MSTRG.4849.1	nonsynonymous	c.G3229A	p.A1077T	homozygous	nonconservative	TAQGNISIADVASDGSFI[A-T]VENTSVSHDEK
MSTRG.4856.1	nonsynonymous	c.A527G	p.D176G	homozygous	nonconservative	TMIELETIAEAQADEDTDINEKPTVVEE[D-G]AEELK
MSTRG.4856.1	nonsynonymous	c.A982T	p.T328S	homozygous	conservative	ADETTGVSMASVPTTPKPDE[T-S]ASTPLR
MSTRG.4856.1	nonsynonymous	c.C1612T	p.P538S	homozygous	nonconservative	ISTVEEPVPIIEETPEPPAHEEIQAVVNEEPS[P-S]K
MSTRG.4856.1	nonsynonymous	c.C456G	p.F152L	homozygous	conservative	TMIE[F-L]ETIAEAQADEDTDINEKPTVVEEGAEELK
MSTRG.4856.1	nonsynonymous	c.G494A	p.G165D	homozygous	nonconservative	TMIELETIAEAQADEDT[G-D]INEKPTVVEEGAEELK
MSTRG.4856.1	nonsynonymous	c.G506A	p.R169K	homozygous	conservative	TMIELETIAEAQADEDTDINE[R-K]PTVVEEGAEELK
MSTRG.4856.1	nonsynonymous	c.T665A	p.I222N	homozygous	nonconservative	TPNELD[I-N]PANEEPIDSEPFK
MSTRG.4856.1	nonsynonymous	c.T668C	p.L223P	homozygous	conservative	TPNELDN[L-P]ANEEPIDSEPFK
MSTRG.4856.1	synonymous	c.A696G	p.E232E	homozygous	NA	TPNELDNPANEEPIDS[E-E]PFK
MSTRG.4856.1	synonymous	c.A996G	p.P332P	homozygous	NA	ADETTGVSMASVPTTPKPDESAST[P-P]LR
MSTRG.4856.1	synonymous	c.T1596C	p.V532V	homozygous	NA	ISTVEEPVPIIEETPEPPAHEEIQAV[V-V]NEEPSSK
MSTRG.4856.1	synonymous	c.T1611C	p.S537S	homozygous	NA	ISTVEEPVPIIEETPEPPAHEEIQAVVNEEP[S-S]SK
MSTRG.4856.1	synonymous	c.T675C	p.N225N	homozygous	NA	TPNELDNPA[N-N]EEPIDSEPFK
MSTRG.4856.2	nonsynonymous	c.A527G	p.D176G	homozygous	nonconservative	TMIELETIAEAQADEDTDINEKPTVVEE[D-G]AEELK
MSTRG.4856.2	nonsynonymous	c.A982T	p.T328S	homozygous	conservative	ADETTGVSMASVPTTPKPDE[T-S]ASTPLR
MSTRG.4856.2	nonsynonymous	c.C1612T	p.P538S	homozygous	nonconservative	ISTVEEPVPIIEETPEPPAHEEIQAVVNEEPS[P-S]K
MSTRG.4856.2	nonsynonymous	c.C456G	p.F152L	homozygous	conservative	TMIE[F-L]ETIAEAQADEDTDINEKPTVVEEGAEELK
MSTRG.4856.2	nonsynonymous	c.G494A	p.G165D	homozygous	nonconservative	TMIELETIAEAQADEDT[G-D]INEKPTVVEEGAEELK
MSTRG.4856.2	nonsynonymous	c.G506A	p.R169K	homozygous	conservative	TMIELETIAEAQADEDTDINE[R-K]PTVVEEGAEELK
MSTRG.4856.2	nonsynonymous	c.T665A	p.I222N	homozygous	nonconservative	TPNELD[I-N]PANEEPIDSEPFK
MSTRG.4856.2	nonsynonymous	c.T668C	p.L223P	homozygous	conservative	TPNELDN[L-P]ANEEPIDSEPFK
MSTRG.4856.2	synonymous	c.A696G	p.E232E	homozygous	NA	TPNELDNPANEEPIDS[E-E]PFK
MSTRG.4856.2	synonymous	c.A996G	p.P332P	homozygous	NA	ADETTGVSMASVPTTPKPDESAST[P-P]LR
MSTRG.4856.2	synonymous	c.T1596C	p.V532V	homozygous	NA	ISTVEEPVPIIEETPEPPAHEEIQAV[V-V]NEEPSSK
MSTRG.4856.2	synonymous	c.T1611C	p.S537S	homozygous	NA	ISTVEEPVPIIEETPEPPAHEEIQAVVNEEP[S-S]SK
MSTRG.4856.2	synonymous	c.T675C	p.N225N	homozygous	NA	TPNELDNPA[N-N]EEPIDSEPFK
MSTRG.4856.3	nonsynonymous	c.A533G	p.D178G	homozygous	nonconservative	TMIELETIAEAQADEDTDINEKPTVVEE[D-G]AEELK
MSTRG.4856.3	nonsynonymous	c.A988T	p.T330S	homozygous	conservative	ADETTGVSMASVPTTPKPDE[T-S]ASTPLR
MSTRG.4856.3	nonsynonymous	c.C1618T	p.P540S	homozygous	nonconservative	ISTVEEPVPIIEETPEPPAHEEIQAVVNEEPS[P-S]K
MSTRG.4856.3	nonsynonymous	c.C462G	p.F154L	homozygous	conservative	TMIE[F-L]ETIAEAQADEDTDINEKPTVVEEGAEELK
MSTRG.4856.3	nonsynonymous	c.G500A	p.G167D	homozygous	nonconservative	TMIELETIAEAQADEDT[G-D]INEKPTVVEEGAEELK
MSTRG.4856.3	nonsynonymous	c.G512A	p.R171K	homozygous	conservative	TMIELETIAEAQADEDTDINE[R-K]PTVVEEGAEELK
MSTRG.4856.3	nonsynonymous	c.T671A	p.I224N	homozygous	nonconservative	TPNELD[I-N]PANEEPIDSEPFK
MSTRG.4856.3	nonsynonymous	c.T674C	p.L225P	homozygous	conservative	TPNELDN[L-P]ANEEPIDSEPFK
MSTRG.4856.3	synonymous	c.A1002G	p.P334P	homozygous	NA	ADETTGVSMASVPTTPKPDESAST[P-P]LR
MSTRG.4856.3	synonymous	c.A702G	p.E234E	homozygous	NA	TPNELDNPANEEPIDS[E-E]PFK
MSTRG.4856.3	synonymous	c.T1602C	p.V534V	homozygous	NA	ISTVEEPVPIIEETPEPPAHEEIQAV[V-V]NEEPSSK
MSTRG.4856.3	synonymous	c.T1617C	p.S539S	homozygous	NA	ISTVEEPVPIIEETPEPPAHEEIQAVVNEEP[S-S]SK
MSTRG.4856.3	synonymous	c.T681C	p.N227N	homozygous	NA	TPNELDNPA[N-N]EEPIDSEPFK
MSTRG.4856.4	nonsynonymous	c.A1135T	p.T379S	homozygous	conservative	ADETTGVSMASVPTTPKPDE[T-S]ASTPLR
MSTRG.4856.4	nonsynonymous	c.A680G	p.D227G	homozygous	nonconservative	TMIELETIAEAQADEDTDINEKPTVVEE[D-G]AEELK
MSTRG.4856.4	nonsynonymous	c.C1765T	p.P589S	homozygous	nonconservative	ISTVEEPVPIIEETPEPPAHEEIQAVVNEEPS[P-S]K
MSTRG.4856.4	nonsynonymous	c.C609G	p.F203L	homozygous	conservative	TMIE[F-L]ETIAEAQADEDTDINEKPTVVEEGAEELK
MSTRG.4856.4	nonsynonymous	c.G647A	p.G216D	homozygous	nonconservative	TMIELETIAEAQADEDT[G-D]INEKPTVVEEGAEELK
MSTRG.4856.4	nonsynonymous	c.G659A	p.R220K	homozygous	conservative	TMIELETIAEAQADEDTDINE[R-K]PTVVEEGAEELK
MSTRG.4856.4	nonsynonymous	c.T818A	p.I273N	homozygous	nonconservative	TPNELD[I-N]PANEEPIDSEPFK
MSTRG.4856.4	nonsynonymous	c.T821C	p.L274P	homozygous	conservative	TPNELDN[L-P]ANEEPIDSEPFK
MSTRG.4856.4	synonymous	c.A1149G	p.P383P	homozygous	NA	ADETTGVSMASVPTTPKPDESAST[P-P]LR
MSTRG.4856.4	synonymous	c.A849G	p.E283E	homozygous	NA	TPNELDNPANEEPIDS[E-E]PFK
MSTRG.4856.4	synonymous	c.T1749C	p.V583V	homozygous	NA	ISTVEEPVPIIEETPEPPAHEEIQAV[V-V]NEEPSSK
MSTRG.4856.4	synonymous	c.T1764C	p.S588S	homozygous	NA	ISTVEEPVPIIEETPEPPAHEEIQAVVNEEP[S-S]SK
MSTRG.4856.4	synonymous	c.T828C	p.N276N	homozygous	NA	TPNELDNPA[N-N]EEPIDSEPFK
MSTRG.4858.1	nonsynonymous	c.T725A	p.L242H	homozygous	nonconservative	INEQ[L-H]IMDSFNENMYR
MSTRG.488.1	nonsynonymous	c.A2565T	p.E855D	homozygous	conservative	[E-D]GVGLEHLPELAYIFNEDLADVITR
MSTRG.4889.1	nonsynonymous	c.C80T	p.A27V	homozygous	conservative	TGMHVPPPPLQEN[A-V]GGSTVR
MSTRG.4889.1	nonsynonymous	c.G41C	p.S14T	homozygous	conservative	[S-T]GMHVPPPPLQENVGGSTVR
MSTRG.4891.5	nonsynonymous	c.A56G	p.E19G	homozygous	nonconservative	REIGA[E-G]DVSLEYIFDPQVLTEDIVGDVPDGFAVRPLK
MSTRG.4891.5	nonsynonymous	c.C64A	p.R22S	homozygous	nonconservative	REIGAGDV[R-S]LEYIFDPQVLTEDIVGDVPDGFAVRPLK
MSTRG.4891.5	nonsynonymous	c.G59A	p.G20D	homozygous	nonconservative	REIGAG[G-D]VSLEYIFDPQVLTEDIVGDVPDGFAVRPLK
MSTRG.4891.5	synonymous	c.A129T	p.G43G	homozygous	NA	REIGAGDVSLEYIFDPQVLTEDIVGDVPD[G-G]FAVRPLK
MSTRG.4891.5	synonymous	c.C108T	p.I36I	homozygous	NA	REIGAGDVSLEYIFDPQVLTED[I-I]VGDVPDGFAVRPLK
MSTRG.4891.5	synonymous	c.T69C	p.L23L	homozygous	NA	REIGAGDVS[L-L]EYIFDPQVLTEDIVGDVPDGFAVRPLK
MSTRG.4931.1	nonsynonymous	c.A2417C	p.N806T	homozygous	conservative	MAHHFAAPQARPPNQDNATSGAT[N-T]EGGVTGDAR
MSTRG.4931.1	nonsynonymous	c.G2431A	p.A811T	homozygous	nonconservative	MAHHFAAPQARPPNQDNATSGATTEGGV[A-T]GDAR
MSTRG.4950.1	nonsynonymous	c.A9841G	p.S3281G	homozygous	nonconservative	GTDLQ[S-G]LWTSVNEAATER
MSTRG.4950.1	nonsynonymous	c.G4990T	p.A1664S	homozygous	nonconservative	HSGHIE[A-S]TIAQGESLIR
MSTRG.4950.1	nonsynonymous	c.T6050A	p.I2017N	homozygous	nonconservative	EAYPGGNAEHIAQQQVELAESWQELQ[I-N]AIEDR
MSTRG.4950.1	synonymous	c.C6043T	p.L2015L	homozygous	NA	EAYPGGNAEHIAQQQVELAESWQE[L-L]QNAIEDR
MSTRG.4970.3	nonsynonymous	c.T602C	p.L201P	homozygous	conservative	K[L-P]DIDGFLVGGASLKPDFVK
MSTRG.4972.1	nonsynonymous	c.G632A	p.S211N	homozygous	conservative	LVFV[S-N]SSGETLCESNFHGTNYNLHGIEK
MSTRG.4972.1	nonsynonymous	c.T1255G	p.L419V	homozygous	conservative	LAENTADPAIN[L-V]LFHDAGVILGK
MSTRG.4972.1	nonsynonymous	c.T1255G	p.L419V	homozygous	conservative	PAIN[L-V]LFHDAGVILGK
MSTRG.4972.1	nonsynonymous	c.T1484C	p.V495A	homozygous	conservative	VHLYRPTGSSAIGAALL[V-A]ANK
MSTRG.4972.1	synonymous	c.G1239A	p.A413A	homozygous	NA	LAENT[A-A]DPAINVLFHDAGVILGK
MSTRG.4972.1	synonymous	c.T1438C	p.L480L	homozygous	NA	VH[L-L]YRPTGSSAIGAALLAANK
MSTRG.4973.1	nonsynonymous	c.A998G	p.D333G	homozygous	nonconservative	FDSAHLEWIYD[D-G]FTLGK
MSTRG.4973.1	synonymous	c.T996C	p.D332D	homozygous	NA	FDSAHLEWIY[D-D]GFTLGK
MSTRG.4973.2	nonsynonymous	c.A1630G	p.T544A	homozygous	nonconservative	TQTNVNE[T-A]LVAIQNLTIDETK
MSTRG.4973.2	nonsynonymous	c.G1399A	p.V467I	homozygous	conservative	DLCQLIGIAEHPDP[V-I]VCLK
MSTRG.4973.2	synonymous	c.C1377T	p.G459G	homozygous	NA	DLCQLI[G-G]IAEHPDPIVCLK
MSTRG.4973.2	synonymous	c.C1623T	p.V541V	homozygous	NA	TQTN[V-V]NEALVAIQNLTIDETK
MSTRG.498.1	nonsynonymous	c.G1465T	p.A489S	homozygous	nonconservative	FQYDNAVTLDLWDALHEASGQDV[A-S]K
MSTRG.498.1	nonsynonymous	c.G1627A	p.V543M	homozygous	conservative	FIADGGEDLEDSLWQVPIN[V-M]CVASNPAEIAGK
MSTRG.498.1	nonsynonymous	c.G709T	p.A237S	homozygous	nonconservative	ATFDVSLVVDPGMTAISNMPV[A-S]ATTPCEYHGLK
MSTRG.498.1	nonsynonymous	c.G718A	p.A240T	homozygous	nonconservative	ATFDVSLVVDPGMTAISNMPVSAT[A-T]PCEYHGLK
MSTRG.498.1	synonymous	c.C1650T	p.A550A	homozygous	NA	FIADGGEDLEDSLWQVPINMCVASNP[A-A]EIAGK
MSTRG.5000.1	nonsynonymous	c.A2675C	p.N892T	homozygous	conservative	LVLANPEDNVHNSAIEPMDRPL[N-T]A
MSTRG.5000.2	nonsynonymous	c.A2678C	p.N893T	homozygous	conservative	LVLANPEDNVHNSAIEPMDRPL[N-T]A
MSTRG.5037.1	nonsynonymous	c.C313T	p.P105S	homozygous	nonconservative	IAEESINSCSTTE[P-S]TFEATHYAR
MSTRG.5037.1	nonsynonymous	c.G406A	p.V136M	homozygous	conservative	SVGLQDWYLLNAYTT[V-M]LK
MSTRG.5037.1	nonsynonymous	c.T374A	p.L125Q	homozygous	nonconservative	SVGL[L-Q]DWYLLNAYTTMLK
MSTRG.5037.1	synonymous	c.G387A	p.L129L	homozygous	NA	SVGLQDWY[L-L]LNAYTTMLK
MSTRG.5060.1	nonsynonymous	c.A1661G	p.Q554R	homozygous	nonconservative	LCDGVDDCGDGSDESNCESHS[Q-R]
MSTRG.5060.1	nonsynonymous	c.A6031G	p.I2011V	homozygous	conservative	TQLHDAGNYICTAVNDYGIGQSP[I-V]AR
MSTRG.5060.1	nonsynonymous	c.G1906A	p.E636K	homozygous	nonconservative	RTEQPSETEREE[E-K]
MSTRG.5060.1	nonsynonymous	c.G5962A	p.A1988T	homozygous	nonconservative	[A-T]QLHDAGNYICTAVNDYGIGQSPVAR
MSTRG.5060.1	nonsynonymous	c.T1273C	p.Y425H	homozygous	nonconservative	SISQCGAEE[Y-H]QCENGECTAK
MSTRG.5060.1	nonsynonymous	c.T1675C	p.S559P	homozygous	nonconservative	EEGG[S-P]HVLEESPSPLISSR
MSTRG.5060.1	nonsynonymous	c.T1874C	p.I625T	homozygous	nonconservative	R[I-T]EQPSETEREEK
MSTRG.5060.1	nonsynonymous	c.T2207A	p.V736D	homozygous	nonconservative	T[V-D]DQDIAQDGANDIQITVYPSEAHVR
MSTRG.5060.1	nonsynonymous	c.T6227C	p.L2076P	homozygous	conservative	IGHQSLPSSVQEHQGVLQI[L-P]R
MSTRG.5060.1	synonymous	c.G1872A	p.R624R	homozygous	NA	[R-R]TEQPSETEREEK
MSTRG.5060.1	synonymous	c.G6186A	p.L2062L	homozygous	NA	IGHQS[L-L]PSSVQEHQGVLQIPR
MSTRG.5060.1	synonymous	c.T1599C	p.L533L	homozygous	NA	[L-L]CDGVDDCGDGSDESNCESHSR
MSTRG.5060.1	synonymous	c.T1695C	p.S565S	heterozygous	NA	EEGGPHVLEE[S-S]PSPLISSR
MSTRG.5060.1	synonymous	c.T1893A	p.T631T	homozygous	NA	RTEQPSE[T-T]EREEK
MSTRG.5060.2	nonsynonymous	c.A4537G	p.I1513V	homozygous	conservative	TQLHDAGNYICTAVNDYGIGQSP[I-V]AR
MSTRG.5060.2	nonsynonymous	c.A455G	p.Q152R	homozygous	nonconservative	LCDGVDDCGDGSDESNCESHS[Q-R]
MSTRG.5060.2	nonsynonymous	c.G4468A	p.A1490T	homozygous	nonconservative	[A-T]QLHDAGNYICTAVNDYGIGQSPVAR
MSTRG.5060.2	nonsynonymous	c.G700A	p.E234K	homozygous	nonconservative	RTEQPSETEREE[E-K]
MSTRG.5060.2	nonsynonymous	c.T1001A	p.V334D	homozygous	nonconservative	T[V-D]DQDIAQDGANDIQITVYPSEAHVR
MSTRG.5060.2	nonsynonymous	c.T469C	p.S157P	homozygous	nonconservative	EEGG[S-P]HVLEESPSPLISSR
MSTRG.5060.2	nonsynonymous	c.T4733C	p.L1578P	homozygous	conservative	IGHQSLPSSVQEHQGVLQI[L-P]R
MSTRG.5060.2	nonsynonymous	c.T668C	p.I223T	homozygous	nonconservative	R[I-T]EQPSETEREEK
MSTRG.5060.2	nonsynonymous	c.T67C	p.Y23H	homozygous	nonconservative	SISQCGAEE[Y-H]QCENGECTAK
MSTRG.5060.2	synonymous	c.G4692A	p.L1564L	homozygous	NA	IGHQS[L-L]PSSVQEHQGVLQIPR
MSTRG.5060.2	synonymous	c.G666A	p.R222R	homozygous	NA	[R-R]TEQPSETEREEK
MSTRG.5060.2	synonymous	c.T393C	p.L131L	homozygous	NA	[L-L]CDGVDDCGDGSDESNCESHSR
MSTRG.5060.2	synonymous	c.T489C	p.S163S	heterozygous	NA	EEGGPHVLEE[S-S]PSPLISSR
MSTRG.5060.2	synonymous	c.T687A	p.T229T	homozygous	NA	RTEQPSE[T-T]EREEK
MSTRG.5060.3	nonsynonymous	c.A455G	p.Q152R	homozygous	nonconservative	LCDGVDDCGDGSDESNCESHS[Q-R]
MSTRG.5060.3	nonsynonymous	c.A4825G	p.I1609V	homozygous	conservative	TQLHDAGNYICTAVNDYGIGQSP[I-V]AR
MSTRG.5060.3	nonsynonymous	c.G4756A	p.A1586T	homozygous	nonconservative	[A-T]QLHDAGNYICTAVNDYGIGQSPVAR
MSTRG.5060.3	nonsynonymous	c.G700A	p.E234K	homozygous	nonconservative	RTEQPSETEREE[E-K]
MSTRG.5060.3	nonsynonymous	c.T1001A	p.V334D	homozygous	nonconservative	T[V-D]DQDIAQDGANDIQITVYPSEAHVR
MSTRG.5060.3	nonsynonymous	c.T469C	p.S157P	homozygous	nonconservative	EEGG[S-P]HVLEESPSPLISSR
MSTRG.5060.3	nonsynonymous	c.T5021C	p.L1674P	homozygous	conservative	IGHQSLPSSVQEHQGVLQI[L-P]R
MSTRG.5060.3	nonsynonymous	c.T668C	p.I223T	homozygous	nonconservative	R[I-T]EQPSETEREEK
MSTRG.5060.3	nonsynonymous	c.T67C	p.Y23H	homozygous	nonconservative	SISQCGAEE[Y-H]QCENGECTAK
MSTRG.5060.3	synonymous	c.G4980A	p.L1660L	homozygous	NA	IGHQS[L-L]PSSVQEHQGVLQIPR
MSTRG.5060.3	synonymous	c.G666A	p.R222R	homozygous	NA	[R-R]TEQPSETEREEK
MSTRG.5060.3	synonymous	c.T393C	p.L131L	homozygous	NA	[L-L]CDGVDDCGDGSDESNCESHSR
MSTRG.5060.3	synonymous	c.T489C	p.S163S	heterozygous	NA	EEGGPHVLEE[S-S]PSPLISSR
MSTRG.5060.3	synonymous	c.T687A	p.T229T	homozygous	NA	RTEQPSE[T-T]EREEK
MSTRG.5060.4	nonsynonymous	c.A455G	p.Q152R	homozygous	nonconservative	LCDGVDDCGDGSDESNCESHS[Q-R]
MSTRG.5060.4	nonsynonymous	c.A4825G	p.I1609V	homozygous	conservative	TQLHDAGNYICTAVNDYGIGQSP[I-V]AR
MSTRG.5060.4	nonsynonymous	c.G4756A	p.A1586T	homozygous	nonconservative	[A-T]QLHDAGNYICTAVNDYGIGQSPVAR
MSTRG.5060.4	nonsynonymous	c.G700A	p.E234K	homozygous	nonconservative	RTEQPSETEREE[E-K]
MSTRG.5060.4	nonsynonymous	c.T1001A	p.V334D	homozygous	nonconservative	T[V-D]DQDIAQDGANDIQITVYPSEAHVR
MSTRG.5060.4	nonsynonymous	c.T469C	p.S157P	homozygous	nonconservative	EEGG[S-P]HVLEESPSPLISSR
MSTRG.5060.4	nonsynonymous	c.T5021C	p.L1674P	homozygous	conservative	IGHQSLPSSVQEHQGVLQI[L-P]R
MSTRG.5060.4	nonsynonymous	c.T668C	p.I223T	homozygous	nonconservative	R[I-T]EQPSETEREEK
MSTRG.5060.4	nonsynonymous	c.T67C	p.Y23H	homozygous	nonconservative	SISQCGAEE[Y-H]QCENGECTAK
MSTRG.5060.4	synonymous	c.G4980A	p.L1660L	homozygous	NA	IGHQS[L-L]PSSVQEHQGVLQIPR
MSTRG.5060.4	synonymous	c.G666A	p.R222R	homozygous	NA	[R-R]TEQPSETEREEK
MSTRG.5060.4	synonymous	c.T393C	p.L131L	homozygous	NA	[L-L]CDGVDDCGDGSDESNCESHSR
MSTRG.5060.4	synonymous	c.T489C	p.S163S	heterozygous	NA	EEGGPHVLEE[S-S]PSPLISSR
MSTRG.5060.4	synonymous	c.T687A	p.T229T	homozygous	NA	RTEQPSE[T-T]EREEK
MSTRG.5060.5	nonsynonymous	c.A455G	p.Q152R	homozygous	nonconservative	LCDGVDDCGDGSDESNCESHS[Q-R]
MSTRG.5060.5	nonsynonymous	c.A4900G	p.I1634V	homozygous	conservative	TQLHDAGNYICTAVNDYGIGQSP[I-V]AR
MSTRG.5060.5	nonsynonymous	c.G4831A	p.A1611T	homozygous	nonconservative	[A-T]QLHDAGNYICTAVNDYGIGQSPVAR
MSTRG.5060.5	nonsynonymous	c.G700A	p.E234K	homozygous	nonconservative	RTEQPSETEREE[E-K]
MSTRG.5060.5	nonsynonymous	c.T1001A	p.V334D	homozygous	nonconservative	T[V-D]DQDIAQDGANDIQITVYPSEAHVR
MSTRG.5060.5	nonsynonymous	c.T469C	p.S157P	homozygous	nonconservative	EEGG[S-P]HVLEESPSPLISSR
MSTRG.5060.5	nonsynonymous	c.T5096C	p.L1699P	homozygous	conservative	IGHQSLPSSVQEHQGVLQI[L-P]R
MSTRG.5060.5	nonsynonymous	c.T668C	p.I223T	homozygous	nonconservative	R[I-T]EQPSETEREEK
MSTRG.5060.5	nonsynonymous	c.T67C	p.Y23H	homozygous	nonconservative	SISQCGAEE[Y-H]QCENGECTAK
MSTRG.5060.5	synonymous	c.G5055A	p.L1685L	homozygous	NA	IGHQS[L-L]PSSVQEHQGVLQIPR
MSTRG.5060.5	synonymous	c.G666A	p.R222R	homozygous	NA	[R-R]TEQPSETEREEK
MSTRG.5060.5	synonymous	c.T393C	p.L131L	homozygous	NA	[L-L]CDGVDDCGDGSDESNCESHSR
MSTRG.5060.5	synonymous	c.T489C	p.S163S	heterozygous	NA	EEGGPHVLEE[S-S]PSPLISSR
MSTRG.5060.5	synonymous	c.T687A	p.T229T	homozygous	NA	RTEQPSE[T-T]EREEK
MSTRG.5060.6	nonsynonymous	c.A3907G	p.I1303V	homozygous	conservative	TQLHDAGNYICTAVNDYGIGQSP[I-V]AR
MSTRG.5060.6	nonsynonymous	c.G3838A	p.A1280T	homozygous	nonconservative	[A-T]QLHDAGNYICTAVNDYGIGQSPVAR
MSTRG.5060.6	nonsynonymous	c.T4103C	p.L1368P	homozygous	conservative	IGHQSLPSSVQEHQGVLQI[L-P]R
MSTRG.5060.6	synonymous	c.G4062A	p.L1354L	homozygous	NA	IGHQS[L-L]PSSVQEHQGVLQIPR
MSTRG.5098.2	nonsynonymous	c.A1195C	p.K399Q	heterozygous	nonconservative	LIQQPDQESLVAAE[K-Q]ELMALGAATIEGK
MSTRG.5098.2	synonymous	c.C1167T	p.P389P	homozygous	NA	LIQQ[P-P]DQESLVAAEQELMALGAATIEGK
MSTRG.5099.2	nonsynonymous	c.A607G	p.K203E	homozygous	nonconservative	[K-E]LNISFTAYAPLGSPGR
MSTRG.5104.5	nonsynonymous	c.G184A	p.A62T	homozygous	nonconservative	DFLVPVNSYDGEGSGE[A-T]LPNLLR
MSTRG.5108.1	nonsynonymous	c.A106G	p.N36D	homozygous	nonconservative	LFGGSSA[N-D]EAADLFVQAGNLFK
MSTRG.5108.1	nonsynonymous	c.A85C	p.I29L	homozygous	conservative	[I-L]FGGSSADEAADLFVQAGNLFK
MSTRG.5108.1	synonymous	c.T93C	p.G31G	homozygous	NA	LF[G-G]GSSADEAADLFVQAGNLFK
MSTRG.5118.1	nonsynonymous	c.G175C	p.V59L	homozygous	conservative	TGQP[V-L]QDATTDGDFLSGLMSIASDLSK
MSTRG.5126.1	nonsynonymous	c.A280C	p.S94R	homozygous	nonconservative	LDYESELGTVDPFEEDFSAIASHEIVEVIADGD[S-R]
MSTRG.515.1	nonsynonymous	c.A733G	p.I245V	homozygous	conservative	GTI[I-V]QNYHYIEAIMVESVR
MSTRG.5151.1	nonsynonymous	c.T85G	p.S29A	homozygous	nonconservative	AESGFGFATGED[S-A]FQSILENTR
MSTRG.5151.1	nonsynonymous	c.T85G	p.S29A	homozygous	nonconservative	SSGPIRAESGFGFATGED[S-A]FQSILENTR
MSTRG.5151.1	synonymous	c.T72G	p.A24A	homozygous	NA	AESGFGF[A-A]TGEDAFQSILENTR
MSTRG.5151.1	synonymous	c.T72G	p.A24A	homozygous	NA	SSGPIRAESGFGF[A-A]TGEDAFQSILENTR
MSTRG.5151.1	synonymous	c.T75C	p.T25T	homozygous	NA	AESGFGFA[T-T]GEDAFQSILENTR
MSTRG.5151.1	synonymous	c.T75C	p.T25T	homozygous	NA	SSGPIRAESGFGFA[T-T]GEDAFQSILENTR
MSTRG.5158.1	nonsynonymous	c.A255T	p.E85D	homozygous	conservative	TEQE[E-D]ERNDSVQSDSNTIR
MSTRG.5158.1	nonsynonymous	c.G275A	p.R92Q	homozygous	nonconservative	TEQEDERNDSV[R-Q]SDSNTIR
MSTRG.5167.1	nonsynonymous	c.A1258G	p.I420V	homozygous	conservative	CS[I-V]VAEIRDEEHAIELSETLYK
MSTRG.5167.1	nonsynonymous	c.A1258G	p.I420V	homozygous	conservative	SDAFTVNCS[I-V]VAEIRDEEHAIELSETLYK
MSTRG.5167.1	nonsynonymous	c.A1274G	p.H425R	homozygous	conservative	CSVVAEI[H-R]DEEHAIELSETLYK
MSTRG.5167.1	nonsynonymous	c.A1274G	p.H425R	homozygous	conservative	SDAFTVNCSVVAEI[H-R]DEEHAIELSETLYK
MSTRG.5167.1	nonsynonymous	c.A341G	p.N114S	homozygous	conservative	N[N-S]GVYAASAGNHAQALALHGK
MSTRG.5167.1	nonsynonymous	c.C1132G	p.L378V	homozygous	conservative	IDVI[L-V]SDRPGGLSEFTQMISNMGASVK
MSTRG.5167.1	nonsynonymous	c.G1000A	p.G334S	homozygous	nonconservative	VVAEGAGAIGPAALIAG[G-S]LK
MSTRG.5167.1	nonsynonymous	c.G1153C	p.V385L	homozygous	conservative	IDVIVSDRPGG[V-L]SEFTQMISNMGASVK
MSTRG.5167.1	synonymous	c.A1290G	p.A430A	homozygous	NA	CSVVAEIRDEEH[A-A]IELSETLYK
MSTRG.5167.1	synonymous	c.A1290G	p.A430A	homozygous	NA	SDAFTVNCSVVAEIRDEEH[A-A]IELSETLYK
MSTRG.5167.1	synonymous	c.G1299T	p.L433L	homozygous	NA	CSVVAEIRDEEHAIE[L-L]SETLYK
MSTRG.5167.1	synonymous	c.G1299T	p.L433L	homozygous	NA	SDAFTVNCSVVAEIRDEEHAIE[L-L]SETLYK
MSTRG.5216.1	nonsynonymous	c.A121G	p.T41A	homozygous	nonconservative	QIGEELFDQT[T-A]IESLDAR
MSTRG.5226.1	nonsynonymous	c.A2293G	p.N765D	homozygous	nonconservative	ITEGVQSEAGTHPFS[N-D]GELEAGYER
MSTRG.5226.1	synonymous	c.T2313C	p.G771G	homozygous	NA	ITEGVQSEAGTHPFSDGELEA[G-G]YER
MSTRG.5239.1	nonsynonymous	c.G1157A	p.S386N	homozygous	conservative	HF[S-N]EFVQACEENPGVLINQFPYESCITVK
MSTRG.5239.1	nonsynonymous	c.G250C	p.A84P	homozygous	conservative	ILCEETDEG[A-P]NWSVFATK
MSTRG.5239.1	synonymous	c.A264G	p.V88V	homozygous	NA	ILCEETDEGPNWS[V-V]FATK
MSTRG.5239.1	synonymous	c.G246A	p.E82E	homozygous	NA	ILCEETD[E-E]GPNWSVFATK
MSTRG.5239.1	synonymous	c.T1167C	p.V389V	homozygous	NA	HFNEF[V-V]QACEENPGVLINQFPYESCITVK
MSTRG.5271.1	nonsynonymous	c.C2357T	p.T786I	homozygous	nonconservative	MVQQVADAIAGHLDS[T-I]R
MSTRG.5271.1	synonymous	c.G2322A	p.Q774Q	homozygous	NA	MVQ[Q-Q]VADAIAGHLDSIR
MSTRG.5271.1	synonymous	c.G2349A	p.L783L	homozygous	NA	MVQQVADAIAGH[L-L]DSIR
MSTRG.5299.1	nonsynonymous	c.C364A	p.Q122K	homozygous	nonconservative	EWHHWLVVNVPGNDIG[Q-K]
MSTRG.5299.1	nonsynonymous	c.G249T	p.Q83H	homozygous	nonconservative	KLVWDTD[Q-H]GALYTVIFTDPDAPSR
MSTRG.5299.1	nonsynonymous	c.G249T	p.Q83H	homozygous	nonconservative	LVWDTD[Q-H]GALYTVIFTDPDAPSR
MSTRG.5299.1	nonsynonymous	c.G249T	p.Q83H	homozygous	nonconservative	LVWDTD[Q-H]GALYTVIFTDPDAPSRK
MSTRG.5299.1	synonymous	c.T276C	p.T92T	homozygous	NA	KLVWDTDHGALYTVIF[T-T]DPDAPSR
MSTRG.5299.1	synonymous	c.T276C	p.T92T	homozygous	NA	LVWDTDHGALYTVIF[T-T]DPDAPSR
MSTRG.5299.1	synonymous	c.T276C	p.T92T	homozygous	NA	LVWDTDHGALYTVIF[T-T]DPDAPSRK
MSTRG.5299.1	synonymous	c.T291G	p.P97P	homozygous	NA	KLVWDTDHGALYTVIFTDPDA[P-P]SR
MSTRG.5299.1	synonymous	c.T291G	p.P97P	homozygous	NA	LVWDTDHGALYTVIFTDPDA[P-P]SR
MSTRG.5299.1	synonymous	c.T291G	p.P97P	homozygous	NA	LVWDTDHGALYTVIFTDPDA[P-P]SRK
MSTRG.5313.1	nonsynonymous	c.G667A	p.A223T	homozygous	nonconservative	AENSSSIQDQGEGDSSST[A-T]QER
MSTRG.5313.1	synonymous	c.G666A	p.T222T	homozygous	NA	AENSSSIQDQGEGDSSS[T-T]TQER
MSTRG.534.1	nonsynonymous	c.C326G	p.A109G	homozygous	conservative	VLTEASPSH[A-G]IVFDDSLHQEIK
MSTRG.534.1	nonsynonymous	c.T866C	p.V289A	homozygous	conservative	ITGEFESHVQSVDI[V-A]AFNK
MSTRG.534.1	synonymous	c.G852A	p.Q284Q	homozygous	NA	ITGEFESHV[Q-Q]SVDIAAFNK
MSTRG.534.1	synonymous	c.T301C	p.L101L	homozygous	NA	V[L-L]TEASPSHGIVFDDSLHQEIK
MSTRG.535.1	nonsynonymous	c.A157G	p.N53D	homozygous	nonconservative	LAGTSFYNID[N-D]APTCDACYQNSLEK
MSTRG.535.1	synonymous	c.C171T	p.C57C	homozygous	NA	LAGTSFYNIDDAPT[C-C]DACYQNSLEK
MSTRG.535.1	synonymous	c.G168A	p.T56T	homozygous	NA	LAGTSFYNIDDAP[T-T]CDACYQNSLEK
MSTRG.5361.1	nonsynonymous	c.G346A	p.A116T	homozygous	nonconservative	TFAFDFCVGSIEAY[A-T]PLLK
MSTRG.5361.1	nonsynonymous	c.G437A	p.S146N	homozygous	conservative	ALNEVEVGILVNNVGMSYEYPEAFH[S-N]IEGGLER
MSTRG.5361.1	nonsynonymous	c.G437A	p.S146N	homozygous	conservative	NVGMSYEYPEAFH[S-N]IEGGLER
MSTRG.5361.1	synonymous	c.A453G	p.L151L	homozygous	NA	ALNEVEVGILVNNVGMSYEYPEAFHNIEGG[L-L]ER
MSTRG.5361.1	synonymous	c.A453G	p.L151L	homozygous	NA	NVGMSYEYPEAFHNIEGG[L-L]ER
MSTRG.5408.1	nonsynonymous	c.G731A	p.G244E	homozygous	nonconservative	VLATILAG[G-E]KPPGYDWVITVADGSPR
MSTRG.5408.1	synonymous	c.A780G	p.P260P	homozygous	NA	VLATILAGEKPPGYDWVITVADGS[P-P]R
MSTRG.5409.1	nonsynonymous	c.C149G	p.S50C	homozygous	conservative	LPVPVTVSDLHD[S-C]ANVEEK
MSTRG.5409.1	nonsynonymous	c.G657T	p.Q219H	homozygous	nonconservative	IFNSSVTG[Q-H]ASLSR
MSTRG.5409.1	nonsynonymous	c.T649A	p.S217T	homozygous	conservative	IFNSSV[S-T]GHASLSR
MSTRG.5409.2	nonsynonymous	c.C149G	p.S50C	homozygous	conservative	LPVPVTVSDLHD[S-C]ANVEEK
MSTRG.5409.2	nonsynonymous	c.G747T	p.Q249H	homozygous	nonconservative	IFNSSVTG[Q-H]ASLSR
MSTRG.5409.2	nonsynonymous	c.T739A	p.S247T	homozygous	conservative	IFNSSV[S-T]GHASLSR
MSTRG.5416.1	nonsynonymous	c.A304T	p.T102S	homozygous	conservative	TVTMSLVHDLAEAIVGDI[T-S]PYCSVSTEEK
MSTRG.5416.1	nonsynonymous	c.A319G	p.I107V	homozygous	conservative	TVTMSLVHDLAEAIVGDISPYCS[I-V]STEEK
MSTRG.5416.1	nonsynonymous	c.A385G	p.M129V	homozygous	conservative	IAAYVP[M-V]AAVGEQWIEQWK
MSTRG.5430.1	nonsynonymous	c.A289G	p.I97V	homozygous	conservative	QQQQQS[I-V]NTGVSGSGSQR
MSTRG.5430.1	nonsynonymous	c.A289G	p.I97V	homozygous	conservative	QQQQQS[I-V]NTGVSGSGSQRPH
MSTRG.5430.1	nonsynonymous	c.C193G	p.Q65E	homozygous	nonconservative	TATVPTHQTVPGLGGPSVTMSD[Q-E]LFR
MSTRG.5430.1	synonymous	c.A174C	p.P58P	homozygous	NA	TATVPTHQTVPGLGG[P-P]SVTMSDELFR
MSTRG.5430.1	synonymous	c.C180T	p.V60V	homozygous	NA	TATVPTHQTVPGLGGPS[V-V]TMSDELFR
MSTRG.5430.1	synonymous	c.G162A	p.G54G	homozygous	NA	TATVPTHQTVP[G-G]LGGPSVTMSDELFR
MSTRG.5430.2	nonsynonymous	c.A289G	p.I97V	homozygous	conservative	QQQQQS[I-V]NTGVSGSGSQR
MSTRG.5430.2	nonsynonymous	c.A289G	p.I97V	homozygous	conservative	QQQQQS[I-V]NTGVSGSGSQRPH
MSTRG.5430.2	nonsynonymous	c.C193G	p.Q65E	homozygous	nonconservative	TATVPTHQTVPGLGGPSVTMSD[Q-E]LFR
MSTRG.5430.2	synonymous	c.A174C	p.P58P	homozygous	NA	TATVPTHQTVPGLGG[P-P]SVTMSDELFR
MSTRG.5430.2	synonymous	c.C180T	p.V60V	homozygous	NA	TATVPTHQTVPGLGGPS[V-V]TMSDELFR
MSTRG.5430.2	synonymous	c.G162A	p.G54G	homozygous	NA	TATVPTHQTVP[G-G]LGGPSVTMSDELFR
MSTRG.5447.1	nonsynonymous	c.G727A	p.A243T	homozygous	nonconservative	TGQLFDIHTIT[A-T]AGK
MSTRG.5447.1	nonsynonymous	c.G88A	p.A30T	homozygous	nonconservative	GIADL[A-T]SSELAEYLTENDPLK
MSTRG.5447.1	synonymous	c.C84T	p.D28D	homozygous	NA	GIA[D-D]LTSSELAEYLTENDPLK
MSTRG.5447.1	synonymous	c.T130C	p.L44L	homozygous	NA	GIADLTSSELAEYLTENDP[L-L]K
MSTRG.5509.1	nonsynonymous	c.G715A	p.A239T	homozygous	nonconservative	LASMVSGLATTI[A-T]SMPVDIAK
MSTRG.5543.1	nonsynonymous	c.A689G	p.H230R	homozygous	conservative	QPSNIGSTYWDDHETHLYTLVV[H-R]
MSTRG.5548.1	synonymous	c.T529C	p.L177L	homozygous	NA	[L-L]PYVELCPVENFDNPNCR
MSTRG.5567.1	nonsynonymous	c.G216C	p.E72D	homozygous	conservative	GTEGNDAVTGQ[E-D]SSTSHESK
MSTRG.5567.1	nonsynonymous	c.T236C	p.F79S	homozygous	nonconservative	GTEGNDAVTGQDSSTSHE[F-S]K
MSTRG.5567.1	synonymous	c.A207G	p.T69T	homozygous	NA	GTEGNDAV[T-T]GQDSSTSHESK
MSTRG.5570.1	nonsynonymous	c.G725A	p.S242N	homozygous	conservative	YFAPDSDA[S-N]DAIEYDGDRTTAGIVSWATSK
MSTRG.5570.1	nonsynonymous	c.G733A	p.V245I	homozygous	conservative	YFAPDSDANDA[V-I]EYDGDRTTAGIVSWATSK
MSTRG.5570.1	nonsynonymous	c.G855C	p.Q285H	homozygous	nonconservative	VVEATVQDVVEE[Q-H]CK
MSTRG.5570.1	synonymous	c.T729C	p.D243D	homozygous	NA	YFAPDSDAN[D-D]AIEYDGDRTTAGIVSWATSK
MSTRG.5577.1	nonsynonymous	c.G344A	p.G115D	homozygous	nonconservative	VHCPSCGEALSEVEEID[G-D]DIEATGYIQVVK
MSTRG.5577.1	nonsynonymous	c.G655C	p.A219P	homozygous	conservative	TDSHSPDEGTLDWFVMFYDADDAPCNSFI[A-P]TWETVAHK
MSTRG.5578.1	nonsynonymous	c.A1009G	p.T337A	homozygous	nonconservative	ATA[T-A]ITATHSQHSTSLTK
MSTRG.5597.1	nonsynonymous	c.T1901C	p.I634T	homozygous	nonconservative	EAEWLNAYHDQVLS[I-T]VGGYLQK
MSTRG.5597.1	nonsynonymous	c.T509C	p.V170A	homozygous	conservative	ELD[V-A]GDWIGIDPSLHTYDGGEQLIK
MSTRG.560.1	nonsynonymous	c.A3162T	p.Q1054H	homozygous	nonconservative	IEPGAAHQ[Q-H]SQQQVNSIGGK
MSTRG.560.1	nonsynonymous	c.A3162T	p.Q1054H	homozygous	nonconservative	RIEPGAAHQ[Q-H]SQQQVNSIGGK
MSTRG.560.1	nonsynonymous	c.C3349G	p.Q1117E	homozygous	nonconservative	EAVAAQ[Q-E]EIGTDLEQVEVLQK
MSTRG.5633.1	nonsynonymous	c.T943G	p.S315A	homozygous	nonconservative	ILDLYSDNTGCVPLQMGVLA[S-A]QWSNK
MSTRG.5645.1	nonsynonymous	c.A953G	p.E318G	homozygous	nonconservative	TAIVEAFPSID[E-G]VAVSLTETTNPK
MSTRG.5645.1	nonsynonymous	c.G1442A	p.S481N	homozygous	conservative	YPDFL[S-N]QPPPISDLQAFYK
MSTRG.5664.1	nonsynonymous	c.G154A	p.A52T	homozygous	nonconservative	ILQCNVEAGSNEIHIENV[A-T]NYIIHDSVR
MSTRG.5674.1	nonsynonymous	c.C381A	p.D127E	homozygous	conservative	TCNVLVALEQQSP[D-E]IAAGVHVEK
MSTRG.5674.1	nonsynonymous	c.C381A	p.D127E	homozygous	conservative	VLVALEQQSP[D-E]IAAGVHVEK
MSTRG.5674.1	nonsynonymous	c.G1033T	p.A345S	homozygous	nonconservative	[A-S]FGTSGLNESELLEIVNDNFDLRPGMIIK
MSTRG.5674.1	synonymous	c.G405A	p.E135E	homozygous	NA	TCNVLVALEQQSPEIAAGVHV[E-E]K
MSTRG.5674.1	synonymous	c.G405A	p.E135E	homozygous	NA	VLVALEQQSPEIAAGVHV[E-E]K
MSTRG.5675.1	nonsynonymous	c.G64A	p.G22S	homozygous	nonconservative	LVGYDDSSADSAID[G-S]LDNR
MSTRG.569.3	nonsynonymous	c.A2407G	p.T803A	homozygous	nonconservative	NPDNFE[T-A]FLDSPAIPSSEQLTVGHVK
MSTRG.569.3	synonymous	c.T2397C	p.D799D	homozygous	NA	NP[D-D]NFEAFLDSPAIPSSEQLTVGHVK
MSTRG.5708.1	nonsynonymous	c.A166G	p.T56A	homozygous	nonconservative	G[T-A]VATLADLGETISDASDWLYEEK
MSTRG.5708.1	nonsynonymous	c.A205G	p.N69D	homozygous	nonconservative	GAVATLADLGETIS[N-D]ASDWLYEEK
MSTRG.5708.1	nonsynonymous	c.A226G	p.K76E	homozygous	nonconservative	GAVATLADLGETISDASDWLY[K-E]EK
MSTRG.5708.1	nonsynonymous	c.C850T	p.P284S	homozygous	nonconservative	LDHGVPNV[P-S]VAALSHPR
MSTRG.5708.1	nonsynonymous	c.T841C	p.S281P	homozygous	nonconservative	LDHGV[S-P]NVSVAALSHPR
MSTRG.5708.1	nonsynonymous	c.T868C	p.Y290H	homozygous	nonconservative	LDHGVPNVSVAALS[Y-H]PR
MSTRG.5708.1	synonymous	c.T222C	p.L74L	homozygous	NA	GAVATLADLGETISDASDW[L-L]YEEK
MSTRG.5713.1	nonsynonymous	c.G4933A	p.V1645I	homozygous	conservative	KLDTQIQSLQEE[V-I]EHLSK
MSTRG.5726.1	nonsynonymous	c.G1814C	p.C605S	homozygous	conservative	LPLATENFAATPL[C-S]SASEK
MSTRG.5758.1	nonsynonymous	c.A562G	p.T188A	homozygous	nonconservative	FTPGISSGYH[T-A]LTYGWLVDQIVR
MSTRG.5758.1	nonsynonymous	c.T107C	p.I36T	homozygous	nonconservative	YPLHFDGE[I-T]AEGFDGVR
MSTRG.5758.1	nonsynonymous	c.T110C	p.V37A	homozygous	conservative	YPLHFDGET[V-A]EGFDGVR
MSTRG.5758.1	synonymous	c.A576G	p.G192G	homozygous	NA	FTPGISSGYHALTY[G-G]WLVDQIVR
MSTRG.5758.1	synonymous	c.G543A	p.G181G	homozygous	NA	FTP[G-G]ISSGYHALTYGWLVDQIVR
MSTRG.5762.1	nonsynonymous	c.T9137C	p.I3046T	homozygous	nonconservative	ESAEN[I-T]SLESSHVGR
MSTRG.5762.1	synonymous	c.A9147G	p.E3049E	homozygous	NA	ESAENTSL[E-E]SSHVGR
MSTRG.5762.2	nonsynonymous	c.T9143C	p.I3048T	homozygous	nonconservative	ESAEN[I-T]SLESSHVGR
MSTRG.5762.2	synonymous	c.A9153G	p.E3051E	homozygous	NA	ESAENTSL[E-E]SSHVGR
MSTRG.5771.1	nonsynonymous	c.A286G	p.I96V	homozygous	conservative	TAQQLEGNIQVLQYSGDHNTQGFWYEW[I-V]LYK
MSTRG.5771.3	nonsynonymous	c.G1057A	p.V353M	homozygous	conservative	EN[V-M]LVGPACASNTVVLCR
MSTRG.5771.3	synonymous	c.A1068T	p.G356G	homozygous	NA	ENMLV[G-G]PACASNTVVLCR
MSTRG.5771.3	synonymous	c.C1086T	p.N362N	homozygous	NA	ENMLVGPACAS[N-N]TVVLCR
MSTRG.5771.3	synonymous	c.T1074C	p.A358A	homozygous	NA	ENMLVGP[A-A]CASNTVVLCR
MSTRG.578.1	nonsynonymous	c.C2978A	p.P993Q	homozygous	nonconservative	LQNQVQQQQPGST[P-Q]IR
MSTRG.578.1	nonsynonymous	c.G2945A	p.S982N	homozygous	conservative	LQ[S-N]QVQQQQPGSTQIR
MSTRG.5793.1	nonsynonymous	c.A802G	p.N268D	homozygous	nonconservative	S[N-D]DESHVSVMHLDQYLTIAGYK
MSTRG.5793.1	nonsynonymous	c.G854C	p.G285A	homozygous	conservative	SDDESHVSVMHLDQYLTI[G-A]GYK
MSTRG.5825.1	nonsynonymous	c.G1352A	p.R451K	homozygous	conservative	LYVNPTGLAPEIAYFNMDPGGTEDISI[R-K]
MSTRG.5825.1	synonymous	c.G1338A	p.E446E	homozygous	NA	LYVNPTGLAPEIAYFNMDPGGT[E-E]DISIK
MSTRG.5828.1	nonsynonymous	c.G325A	p.G109S	homozygous	nonconservative	NFAFWSTQPVPQFDEEKPETENTFIEPDLPL[G-S]K
MSTRG.5828.1	synonymous	c.G309A	p.E103E	homozygous	NA	NFAFWSTQPVPQFDEEKPETENTFI[E-E]PDLPLSK
MSTRG.5828.1	synonymous	c.T252G	p.T84T	homozygous	NA	NFAFWS[T-T]QPVPQFDEEKPETENTFIEPDLPLSK
MSTRG.586.1	nonsynonymous	c.T368C	p.V123A	homozygous	conservative	ALT[V-A]AEMIELNMIDEDVTEGHK
MSTRG.586.1	synonymous	c.T390C	p.N130N	homozygous	NA	ALTAAEMIEL[N-N]MIDEDVTEGHK
MSTRG.5861.1	nonsynonymous	c.A115G	p.T39A	heterozygous	nonconservative	TPASS[T-A]SNGQAPTDGFVDSGGFEK
MSTRG.5861.1	nonsynonymous	c.A541G	p.K181E	homozygous	nonconservative	PSGTPNLNDSSGDTPHDIHDP[K-E]PVESR
MSTRG.5861.1	nonsynonymous	c.C1439T	p.A480V	homozygous	conservative	IHAQVDVLVEHA[A-V]LLANHLK
MSTRG.5861.1	nonsynonymous	c.G448T	p.A150S	heterozygous	nonconservative	IEPHPEPPKPS[A-S]EGELFGETK
MSTRG.5861.1	nonsynonymous	c.G499A	p.D167N	homozygous	nonconservative	PSGTPNL[D-N]DSSGDTPHDIHDPEPVESR
MSTRG.5861.1	nonsynonymous	c.G508A	p.G170S	homozygous	nonconservative	PSGTPNLNDS[G-S]GDTPHDIHDPEPVESR
MSTRG.5861.1	nonsynonymous	c.G625A	p.V209I	homozygous	conservative	QADTQPAHDHFHSTHGDVPFEP[V-I]GR
MSTRG.5861.1	synonymous	c.A558G	p.R186R	homozygous	NA	PSGTPNLNDSSGDTPHDIHDPEPVES[R-R]
MSTRG.5861.1	synonymous	c.C1446T	p.L482L	homozygous	NA	IHAQVDVLVEHAVL[L-L]ANHLK
MSTRG.5861.1	synonymous	c.T447C	p.S149S	homozygous	NA	IEPHPEPPKP[S-S]SEGELFGETK
MSTRG.5861.4	nonsynonymous	c.C452T	p.A151V	homozygous	conservative	IHAQVDVLVEHA[A-V]LLANHLK
MSTRG.5861.4	synonymous	c.C459T	p.L153L	homozygous	NA	IHAQVDVLVEHAVL[L-L]ANHLK
MSTRG.5885.1	nonsynonymous	c.A1771C	p.N591H	homozygous	nonconservative	NTVDHITAVVADE[N-H]AGHGIK
MSTRG.5885.1	nonsynonymous	c.A359G	p.N120S	homozygous	conservative	TFHNEEDES[N-S]TDVGMNK
MSTRG.5885.1	nonsynonymous	c.A374T	p.K125M	homozygous	nonconservative	TFHNEEDESSTDVG[K-M]NK
MSTRG.5885.1	synonymous	c.A1755G	p.A585A	homozygous	NA	NTVDHIT[A-A]VVADEHAGHGIK
MSTRG.5885.1	synonymous	c.C1767T	p.D589D	homozygous	NA	NTVDHITAVVA[D-D]EHAGHGIK
MSTRG.5885.2	nonsynonymous	c.A1801C	p.N601H	homozygous	nonconservative	NTVDHITAVVADE[N-H]AGHGIK
MSTRG.5885.2	nonsynonymous	c.A389G	p.N130S	homozygous	conservative	TFHNEEDES[N-S]TDVGMNK
MSTRG.5885.2	nonsynonymous	c.A404T	p.K135M	homozygous	nonconservative	TFHNEEDESSTDVG[K-M]NK
MSTRG.5885.2	synonymous	c.A1785G	p.A595A	homozygous	NA	NTVDHIT[A-A]VVADEHAGHGIK
MSTRG.5885.2	synonymous	c.C1797T	p.D599D	homozygous	NA	NTVDHITAVVA[D-D]EHAGHGIK
MSTRG.589.1	nonsynonymous	c.A562G	p.S188G	homozygous	nonconservative	T[S-G]GGGSPSGPGPGFGDNSGGMGGGYK
MSTRG.589.1	nonsynonymous	c.A886G	p.I296V	homozygous	conservative	NIASSAGGAG[I-V]GSLLGNILSGR
MSTRG.589.1	nonsynonymous	c.G574A	p.G192S	homozygous	nonconservative	TGGGG[G-S]PSGPGPGFGDNSGGMGGGYK
MSTRG.589.1	synonymous	c.G897A	p.L299L	homozygous	NA	NIASSAGGAGVGS[L-L]LGNILSGR
MSTRG.589.1	synonymous	c.T561A	p.T187T	homozygous	NA	[T-T]GGGGSPSGPGPGFGDNSGGMGGGYK
MSTRG.589.1	synonymous	c.T597A	p.G199G	homozygous	NA	TGGGGSPSGPGP[G-G]FGDNSGGMGGGYK
MSTRG.591.1	nonsynonymous	c.C603G	p.N201K	homozygous	nonconservative	GEITAEDFDPLFTDLY[N-K]
MSTRG.591.1	synonymous	c.A585G	p.L195L	heterozygous	NA	GEITAEDFDP[L-L]FTDLYK
MSTRG.5920.1	nonsynonymous	c.A1574G	p.N525S	homozygous	conservative	AYD[N-S]VGGPYPIGVDPVWNLAESNK
MSTRG.5920.1	synonymous	c.T1578C	p.V526V	homozygous	NA	AYDS[V-V]GGPYPIGVDPVWNLAESNK
MSTRG.5920.2	nonsynonymous	c.A1601G	p.N534S	homozygous	conservative	AYD[N-S]VGGPYPIGVDPVWNLAESNK
MSTRG.5920.2	synonymous	c.T1605C	p.V535V	homozygous	NA	AYDS[V-V]GGPYPIGVDPVWNLAESNK
MSTRG.5920.3	nonsynonymous	c.A1601G	p.N534S	homozygous	conservative	AYD[N-S]VGGPYPIGVDPVWNLAESNK
MSTRG.5920.3	synonymous	c.T1605C	p.V535V	homozygous	NA	AYDS[V-V]GGPYPIGVDPVWNLAESNK
MSTRG.5920.4	nonsynonymous	c.A1601G	p.N534S	homozygous	conservative	AYD[N-S]VGGPYPIGVDPVWNLAESNK
MSTRG.5920.4	synonymous	c.T1605C	p.V535V	homozygous	NA	AYDS[V-V]GGPYPIGVDPVWNLAESNK
MSTRG.5968.1	nonsynonymous	c.C688G	p.R230G	homozygous	nonconservative	KPITDNIQLPLPPD[R-G]QPVTQSSQFASVK
MSTRG.5968.1	nonsynonymous	c.C709T	p.P237S	homozygous	nonconservative	KPITDNIQLPLPPDGQPVTQS[P-S]QFASVK
MSTRG.5968.1	nonsynonymous	c.C716T	p.S239F	homozygous	nonconservative	KPITDNIQLPLPPDGQPVTQSSQ[S-F]ASVK
MSTRG.5986.1	nonsynonymous	c.G1303A	p.A435T	homozygous	nonconservative	HTEPA[A-T]VAAGQSHGTNVVAK
MSTRG.5987.1	nonsynonymous	c.A125G	p.E42G	homozygous	nonconservative	SDVLNCEMHFGAYIPDHGA[E-G]DR
MSTRG.5987.1	nonsynonymous	c.G680C	p.R227T	homozygous	nonconservative	LLVYQGAAD[R-T]FLAQGQLQPESLMSTNPVTVDVR
MSTRG.5994.1	nonsynonymous	c.C1006G	p.Q336E	homozygous	nonconservative	LASQPTAEIVTTEE[Q-E]GITHEDNDWGIELVDESK
MSTRG.5994.1	nonsynonymous	c.G979A	p.A327T	homozygous	nonconservative	LASQP[A-T]AEIVTTEEEGITHEDNDWGIELVDESK
MSTRG.5995.1	nonsynonymous	c.G652A	p.D218N	homozygous	nonconservative	[D-N]PELFDHVIINSDFEHAYK
MSTRG.5995.1	nonsynonymous	c.G698A	p.R233H	homozygous	conservative	NPELFDHVIINSDFE[R-H]AYK
MSTRG.5995.1	synonymous	c.C675G	p.V225V	homozygous	NA	NPELFDH[V-V]IINSDFEHAYK
MSTRG.5995.1	synonymous	c.G657A	p.P219P	homozygous	NA	N[P-P]ELFDHVIINSDFEHAYK
MSTRG.6007.1	nonsynonymous	c.A535G	p.T179A	homozygous	nonconservative	THGNSIVHQSHFDYIVESNHALHGI[T-A]SEQPLSQEEMK
MSTRG.6007.1	nonsynonymous	c.C296G	p.T99S	homozygous	conservative	EGHADYIPIFLSDMP[T-S]YFYDNSLPVDVALMSVSSPDK
MSTRG.6007.1	nonsynonymous	c.G337A	p.V113M	homozygous	conservative	EGHADYIPIFLSDMPSYFYDNSLPVDVAL[V-M]SVSSPDK
MSTRG.6007.1	synonymous	c.G552A	p.L184L	homozygous	NA	THGNSIVHQSHFDYIVESNHALHGIASEQP[L-L]SQEEMK
MSTRG.6007.1	synonymous	c.T483C	p.H161H	homozygous	NA	THGNSIV[H-H]QSHFDYIVESNHALHGIASEQPLSQEEMK
MSTRG.6014.1	nonsynonymous	c.G383C	p.G128A	homozygous	conservative	[G-A]LYDESGTIDEENLSIVDSINAWR
MSTRG.6029.1	nonsynonymous	c.C2036T	p.A679V	homozygous	conservative	LV[A-V]STIGSIVDAPMENSNYNDYINDLANSLK
MSTRG.6029.1	nonsynonymous	c.G2072A	p.G691E	homozygous	nonconservative	LVVSTIGSIVDAPM[G-E]NSNYNDYINDLANSLK
MSTRG.6041.1	nonsynonymous	c.G1495A	p.V499I	homozygous	conservative	VQAVVAVAGELEAENFHGIEE[V-I]NNR
MSTRG.6041.1	nonsynonymous	c.G4099A	p.E1367K	homozygous	nonconservative	ERLDQLQHAAIDLGADKPEFSGTIDPQITELAHQW[E-K]
MSTRG.6041.1	nonsynonymous	c.G4099A	p.E1367K	homozygous	nonconservative	LDQLQHAAIDLGADKPEFSGTIDPQITELAHQW[E-K]
MSTRG.6041.1	nonsynonymous	c.G4705A	p.E1569K	homozygous	nonconservative	ELIDAGHENSAAFE[E-K]
MSTRG.6041.1	synonymous	c.A4008G	p.Q1336Q	homozygous	NA	ERLD[Q-Q]LQHAAIDLGADKPEFSGTIDPQITELAHQWK
MSTRG.6041.1	synonymous	c.A4008G	p.Q1336Q	homozygous	NA	LD[Q-Q]LQHAAIDLGADKPEFSGTIDPQITELAHQWK
MSTRG.6041.1	synonymous	c.C4668T	p.L1556L	homozygous	NA	E[L-L]IDAGHENSAAFEK
MSTRG.6041.1	synonymous	c.C4671T	p.I1557I	homozygous	NA	EL[I-I]DAGHENSAAFEK
MSTRG.6041.1	synonymous	c.T1476C	p.N492N	homozygous	NA	VQAVVAVAGELEAE[N-N]FHGIEEINNR
MSTRG.6045.1	nonsynonymous	c.C1268A	p.P423Q	homozygous	nonconservative	LLTSAGSSTSHVSAVSVGANTAAP[P-Q]VVPQK
MSTRG.6045.2	nonsynonymous	c.C1253A	p.P418Q	homozygous	nonconservative	LLTSAGSSTSHVSAVSVGANTAAP[P-Q]VVPQK
MSTRG.6045.3	nonsynonymous	c.C1328A	p.P443Q	homozygous	nonconservative	LLTSAGSSTSHVSAVSVGANTAAP[P-Q]VVPQK
MSTRG.605.1	nonsynonymous	c.G1445C	p.S482T	homozygous	conservative	LDAGLYTLQNLSLILADVC[S-T]HTSSAR
MSTRG.605.1	synonymous	c.A1401G	p.L467L	homozygous	NA	LDAG[L-L]YTLQNLSLILADVCTHTSSAR
MSTRG.605.1	synonymous	c.C1398G	p.G466G	homozygous	NA	LDA[G-G]LYTLQNLSLILADVCTHTSSAR
MSTRG.6051.1	nonsynonymous	c.G303C	p.E101D	homozygous	conservative	TSGLS[E-D]SGSEVLQDVIEADK
MSTRG.6051.1	synonymous	c.C291T	p.S97S	homozygous	NA	T[S-S]GLSDSGSEVLQDVIEADK
MSTRG.6053.1	nonsynonymous	c.T410A	p.V137E	homozygous	nonconservative	FETNEGP[V-E]LQSALLEYDR
MSTRG.6058.1	nonsynonymous	c.G1564C	p.V522L	homozygous	conservative	LPATSQNHLGTT[V-L]PNEDTWTMTEQK
MSTRG.6058.1	synonymous	c.A1554G	p.L518L	homozygous	NA	LPATSQNH[L-L]GTTLPNEDTWTMTEQK
MSTRG.6071.1	nonsynonymous	c.T484C	p.Y162H	homozygous	nonconservative	SVGVSN[Y-H]ESQHIEEIK
MSTRG.6082.1	nonsynonymous	c.C461T	p.A154V	homozygous	conservative	NHETFLPGAS[A-V]VSDCPEHMFR
MSTRG.6082.1	synonymous	c.C474T	p.C158C	homozygous	NA	NHETFLPGASVVSD[C-C]PEHMFR
MSTRG.6084.1	nonsynonymous	c.C352G	p.P118A	homozygous	conservative	LTQPVQKPPP[P-A]ATLPEAGADDVGYESCPDMTPEELAK
MSTRG.6084.1	synonymous	c.C402T	p.C134C	homozygous	NA	LTQPVQKPPPAATLPEAGADDVGYES[C-C]PDMTPEELAK
MSTRG.6144.1	nonsynonymous	c.G595A	p.D199N	homozygous	nonconservative	[D-N]ETPMPTQLPATASLASSLPVSAKPPTLPSNK
MSTRG.6144.1	nonsynonymous	c.G601A	p.A201T	homozygous	nonconservative	NE[A-T]PMPTQLPATASLASSLPVSAKPPTLPSNK
MSTRG.6144.2	nonsynonymous	c.G595A	p.D199N	homozygous	nonconservative	[D-N]ETPMPTQLPATASLASSLPVSAKPPTLPSNK
MSTRG.6144.2	nonsynonymous	c.G601A	p.A201T	homozygous	nonconservative	NE[A-T]PMPTQLPATASLASSLPVSAKPPTLPSNK
MSTRG.6156.1	nonsynonymous	c.C1739T	p.A580V	homozygous	conservative	SDAA[A-V]HLQDGETAAK
MSTRG.6156.1	synonymous	c.C1731T	p.D577D	homozygous	NA	S[D-D]AAVHLQDGETAAK
MSTRG.6158.1	nonsynonymous	c.G368A	p.R123K	homozygous	conservative	DSQVEYHHEDQEEY[R-K]
MSTRG.6182.1	nonsynonymous	c.G309A	p.M103I	homozygous	conservative	IAPHQPFDFLINNAGVATLEPFLSITEEA[M-I]TR
MSTRG.6182.1	synonymous	c.G264A	p.G88G	homozygous	NA	IAPHQPFDFLINNA[G-G]VATLEPFLSITEEAITR
MSTRG.6200.1	nonsynonymous	c.G1075A	p.A359T	homozygous	nonconservative	L[A-T]GYIDQLEGFIHFEQR
MSTRG.6202.1	nonsynonymous	c.C143T	p.T48I	homozygous	nonconservative	QRPNPGQPTPEPNRPQHTQNQADVVDNL[T-I]SIWNTGNDR
MSTRG.6202.1	nonsynonymous	c.G106C	p.D36H	homozygous	nonconservative	QRPNPGQPTPEPNRPQ[D-H]TQNQADVVDNLISIWNTGNDR
MSTRG.6202.1	synonymous	c.C129G	p.V43V	homozygous	NA	QRPNPGQPTPEPNRPQHTQNQAD[V-V]VDNLISIWNTGNDR
MSTRG.622.3	nonsynonymous	c.G109A	p.D37N	homozygous	nonconservative	RPYHVDDLSYIMGIHPFDY[D-N]ENDK
MSTRG.622.3	synonymous	c.C90T	p.G30G	homozygous	NA	RPYHVDDLSYIM[G-G]IHPFDYNENDK
MSTRG.6226.1	nonsynonymous	c.G728A	p.S243N	homozygous	conservative	LTENN[S-N]SLYQPSLEMMR
MSTRG.6227.1	nonsynonymous	c.A212G	p.E71G	homozygous	nonconservative	EESGHLSYISAE[E-G]FK
MSTRG.6227.1	nonsynonymous	c.C178G	p.Q60E	homozygous	nonconservative	E[Q-E]SGHLSYISAEGFK
MSTRG.6227.1	nonsynonymous	c.T1129G	p.L377V	homozygous	conservative	RPDE[L-V]HSTYLDTTGR
MSTRG.6227.1	synonymous	c.G1137C	p.S379S	homozygous	NA	RPDEVH[S-S]TYLDTTGR
MSTRG.6232.1	nonsynonymous	c.A106C	p.T36P	homozygous	nonconservative	VVSGQTGNSTVEQVPTPAASVPR[T-P]TTSSQK
MSTRG.6232.1	nonsynonymous	c.A2062G	p.S688G	homozygous	nonconservative	Q[S-G]TGSTGSSEIEATTPVTSK
MSTRG.6243.3	nonsynonymous	c.A4190C	p.Q1397P	homozygous	nonconservative	SESLAPQQPICTLAISLPEYTGEQ[Q-P]K
MSTRG.6243.3	nonsynonymous	c.G4765A	p.A1589T	homozygous	nonconservative	AEQPVADT[A-T]GDDGDHVIPEEDEVSEVR
MSTRG.6243.3	synonymous	c.A4167G	p.L1389L	homozygous	NA	SESLAPQQPICTLAIS[L-L]PEYTGEQPK
MSTRG.6268.1	nonsynonymous	c.A28G	p.I10V	homozygous	conservative	TIP[I-V]SEVEQHSSAQSCWIIMDGK
MSTRG.6268.1	nonsynonymous	c.G263A	p.G88D	homozygous	nonconservative	LPTDAVYS[G-D]TSITNVTNK
MSTRG.6268.1	nonsynonymous	c.G288T	p.K96N	homozygous	nonconservative	LPTDAVYSDTSITNVT[K-N]K
MSTRG.6268.1	nonsynonymous	c.T104C	p.I35T	homozygous	nonconservative	VYDVT[I-T]FLSEHPGGMEAITEFAGK
MSTRG.6268.1	nonsynonymous	c.T130A	p.L44M	homozygous	conservative	LSEHPGG[L-M]EAITEFAGK
MSTRG.6268.1	nonsynonymous	c.T130A	p.L44M	homozygous	conservative	VYDVTTFLSEHPGG[L-M]EAITEFAGK
MSTRG.6268.1	synonymous	c.C111G	p.L37L	homozygous	NA	[L-L]SEHPGGMEAITEFAGK
MSTRG.6268.1	synonymous	c.C111G	p.L37L	homozygous	NA	VYDVTTF[L-L]SEHPGGMEAITEFAGK
MSTRG.6272.1	nonsynonymous	c.A46G	p.T16A	homozygous	nonconservative	TENALNSDSI[T-A]SDDTNLNELTSLIQGVLQQTQDR
MSTRG.6274.1	nonsynonymous	c.C2276T	p.S759L	homozygous	nonconservative	HSGVSEEY[S-L]QHSGR
MSTRG.6274.1	synonymous	c.C2265T	p.S755S	homozygous	NA	HSGV[S-S]EEYLQHSGR
MSTRG.6275.1	nonsynonymous	c.A1042G	p.I348V	homozygous	conservative	S[I-V]LIQPEGGDAVLLEGVAEAIK
MSTRG.6279.1	nonsynonymous	c.G1635T	p.E545D	homozygous	conservative	TWTHIDGVQHIIALDANG[E-D]VYGIGK
MSTRG.6279.1	synonymous	c.A1599G	p.G533G	homozygous	NA	TWTHID[G-G]VQHIIALDANGDVYGIGK
MSTRG.6279.1	synonymous	c.C1593T	p.I531I	homozygous	NA	TWTH[I-I]DGVQHIIALDANGDVYGIGK
MSTRG.6279.2	nonsynonymous	c.G1122T	p.E374D	homozygous	conservative	TWTHIDGVQHIIALDANG[E-D]VYGIGK
MSTRG.6279.2	synonymous	c.A1086G	p.G362G	homozygous	NA	TWTHID[G-G]VQHIIALDANGDVYGIGK
MSTRG.6279.2	synonymous	c.C1080T	p.I360I	homozygous	NA	TWTH[I-I]DGVQHIIALDANGDVYGIGK
MSTRG.6280.1	nonsynonymous	c.G580A	p.A194T	homozygous	nonconservative	FEEQNAPDVYYI[A-T]TSGLLPSK
MSTRG.6289.1	nonsynonymous	c.A1413C	p.E471D	homozygous	conservative	HNT[E-D]FYASIAVPLFTQCYEPLSLAK
MSTRG.6289.1	nonsynonymous	c.C1529G	p.A510G	homozygous	conservative	[A-G]GIPTSLQTQSTQQWDFPNGWSPLNHMIIEGLR
MSTRG.6289.1	synonymous	c.A1470G	p.L490L	homozygous	NA	HNTDFYASIAVPLFTQCYEPLS[L-L]AK
MSTRG.6289.1	synonymous	c.T1410C	p.T470T	homozygous	NA	HN[T-T]DFYASIAVPLFTQCYEPLSLAK
MSTRG.6293.1	nonsynonymous	c.G1267A	p.V423I	homozygous	conservative	LNQEQFALINHLV[V-I]MR
MSTRG.6293.1	synonymous	c.G1236A	p.Q412Q	homozygous	NA	LN[Q-Q]EQFALINHLVIMR
MSTRG.6307.3	nonsynonymous	c.A236C	p.Q79P	homozygous	nonconservative	LFIETCS[Q-P]TSTHTAADTR
MSTRG.6307.3	nonsynonymous	c.C232T	p.P78S	homozygous	nonconservative	LFIETC[P-S]PTSTHTAADTR
MSTRG.6339.1	nonsynonymous	c.C1219G	p.Q407E	homozygous	nonconservative	AQAMDPEGNLVDDFVFDSGSG[Q-E]LSR
MSTRG.6339.1	synonymous	c.T1200G	p.V400V	homozygous	NA	AQAMDPEGNLVDDF[V-V]FDSGSGELSR
MSTRG.6356.1	nonsynonymous	c.A157G	p.S53G	homozygous	nonconservative	[S-G]RHPDFVLAAIGIHPIQK
MSTRG.6356.1	nonsynonymous	c.A607C	p.N203H	homozygous	nonconservative	FLVDVVPL[N-H]HLLLETDSPVLGLVK
MSTRG.6356.1	synonymous	c.C640T	p.L214L	homozygous	NA	FLVDVVPLHHLLLETDSPV[L-L]GLVK
MSTRG.6358.3	nonsynonymous	c.T803G	p.I268S	homozygous	nonconservative	APQ[I-S]TKPPPAPVVNTK
MSTRG.6358.4	nonsynonymous	c.T803G	p.I268S	homozygous	nonconservative	APQ[I-S]TKPPPAPVVNTK
MSTRG.636.1	nonsynonymous	c.A703G	p.T235A	homozygous	nonconservative	HANGSI[T-A]MQVLGSSK
MSTRG.636.1	nonsynonymous	c.A723C	p.R241S	heterozygous	nonconservative	HANGSIAMQVLG[R-S]SK
MSTRG.636.1	nonsynonymous	c.G686A	p.R229H	homozygous	conservative	[R-H]ANGSIAMQVLGSSK
MSTRG.636.1	synonymous	c.G717T	p.L239L	homozygous	NA	HANGSIAMQV[L-L]GSSK
MSTRG.636.2	nonsynonymous	c.A934G	p.T312A	homozygous	nonconservative	HANGSI[T-A]MQVLGSSK
MSTRG.636.2	nonsynonymous	c.A954C	p.R318S	heterozygous	nonconservative	HANGSIAMQVLG[R-S]SK
MSTRG.636.2	nonsynonymous	c.G917A	p.R306H	homozygous	conservative	[R-H]ANGSIAMQVLGSSK
MSTRG.636.2	synonymous	c.G948T	p.L316L	homozygous	NA	HANGSIAMQV[L-L]GSSK
MSTRG.636.3	nonsynonymous	c.A934G	p.T312A	homozygous	nonconservative	HANGSI[T-A]MQVLGSSK
MSTRG.636.3	nonsynonymous	c.A954C	p.R318S	heterozygous	nonconservative	HANGSIAMQVLG[R-S]SK
MSTRG.636.3	nonsynonymous	c.G917A	p.R306H	homozygous	conservative	[R-H]ANGSIAMQVLGSSK
MSTRG.636.3	synonymous	c.G948T	p.L316L	homozygous	NA	HANGSIAMQV[L-L]GSSK
MSTRG.6362.3	nonsynonymous	c.C913T	p.L305F	homozygous	conservative	HIDSPSLIDALGSYT[L-F]LR
MSTRG.6362.3	nonsynonymous	c.T918G	p.F306L	homozygous	conservative	HIDSPSLIDALGSYTF[F-L]R
MSTRG.6362.3	synonymous	c.A897G	p.A299A	heterozygous	NA	HIDSPSLID[A-A]LGSYTFLR
MSTRG.6362.3	synonymous	c.T885C	p.S295S	homozygous	NA	HIDSP[S-S]LIDALGSYTFLR
MSTRG.6371.2	nonsynonymous	c.C383G	p.T128S	homozygous	conservative	HEVVNYDVTE[T-S]GYDIQIK
MSTRG.6380.1	nonsynonymous	c.A1080T	p.E360D	homozygous	conservative	YLE[E-D]TNQAVSCSADGTLR
MSTRG.6380.1	synonymous	c.A1113T	p.G371G	homozygous	NA	YLEDTNQAVSCSAD[G-G]TLR
MSTRG.6380.1	synonymous	c.T1071C	p.Y357Y	homozygous	NA	[Y-Y]LEDTNQAVSCSADGTLR
MSTRG.6382.1	nonsynonymous	c.A1514G	p.N505S	homozygous	conservative	SSSDVLSTTTTPDPAFSFDH[N-S]SVEELDDHPDNQLLDYHGR
MSTRG.6382.1	nonsynonymous	c.C1840G	p.R614G	homozygous	nonconservative	FPTPSLIEEG[R-G]DAVVEGDVPEEFK
MSTRG.6382.1	nonsynonymous	c.G2401C	p.E801Q	homozygous	nonconservative	VDLALSNGGSEL[E-Q]TDEK
MSTRG.6382.1	nonsynonymous	c.T1646G	p.I549S	homozygous	nonconservative	ERNESPQLSSPGASFISSSDQIPC[I-S]GAPSK
MSTRG.6382.1	nonsynonymous	c.T1820C	p.L607P	homozygous	conservative	FPT[L-P]SLIEEGGDAVVEGDVPEEFK
MSTRG.6382.1	nonsynonymous	c.T1847C	p.V616A	homozygous	conservative	FPTPSLIEEGGD[V-A]VVEGDVPEEFK
MSTRG.6382.1	synonymous	c.A1551G	p.Q517Q	homozygous	NA	SSSDVLSTTTTPDPAFSFDHSSVEELDDHPDN[Q-Q]LLDYHGR
MSTRG.6382.1	synonymous	c.C1497G	p.A499A	homozygous	NA	SSSDVLSTTTTPDP[A-A]FSFDHSSVEELDDHPDNQLLDYHGR
MSTRG.6382.1	synonymous	c.C2409T	p.D803D	homozygous	NA	VDLALSNGGSELQT[D-D]EK
MSTRG.6382.1	synonymous	c.G1818A	p.T606T	homozygous	NA	FP[T-T]PSLIEEGGDAVVEGDVPEEFK
MSTRG.6384.1	nonsynonymous	c.A4139C	p.D1380A	homozygous	nonconservative	TAGETVLQIWNT[D-A]DHSQNVFLR
MSTRG.6384.1	nonsynonymous	c.G1720T	p.A574S	homozygous	nonconservative	VQSSDNDVFRPV[A-S]EYVPTLPSVGTGCSTVMLK
MSTRG.6384.1	synonymous	c.A4137G	p.T1379T	homozygous	NA	TAGETVLQIWN[T-T]ADHSQNVFLR
MSTRG.6389.1	nonsynonymous	c.G2275A	p.A759T	homozygous	nonconservative	PVEGAQRP[A-T]EALSALNTFEQK
MSTRG.6389.1	nonsynonymous	c.T10111G	p.S3371A	homozygous	nonconservative	TSHQ[S-A]SPTALPFITSQQMGALSR
MSTRG.6389.1	synonymous	c.A2310G	p.Q770Q	homozygous	NA	PVEGAQRPTEALSALNTFE[Q-Q]K
MSTRG.6393.1	nonsynonymous	c.T8C	p.L3P	homozygous	conservative	MW[L-P]EGLQLDQEILLDAGAHLHR
MSTRG.6393.2	nonsynonymous	c.T8C	p.L3P	homozygous	conservative	MW[L-P]EGLQLDQEILLDAGAHLHR
MSTRG.6397.1	nonsynonymous	c.C139T	p.P47S	homozygous	nonconservative	TTAVTATPSEPTALPSDQPS[P-S]K
MSTRG.6406.1	nonsynonymous	c.A643G	p.N215D	homozygous	nonconservative	FVSGQFL[N-D]HLDFYVPETER
MSTRG.6406.1	nonsynonymous	c.G670A	p.A224T	homozygous	nonconservative	FVSGQFLDHLDFYVPE[A-T]ER
MSTRG.6418.1	nonsynonymous	c.A254G	p.N85S	homozygous	conservative	TELHGFADELLENENLTF[N-S]R
MSTRG.6418.1	synonymous	c.A219G	p.A73A	homozygous	NA	TELHGF[A-A]DELLENENLTFSR
MSTRG.6419.1	nonsynonymous	c.G601A	p.A201T	homozygous	nonconservative	PIAPHL[A-T]IYQPQLTWMVSGLHR
MSTRG.6419.1	synonymous	c.G612A	p.Q204Q	homozygous	NA	PIAPHLTIY[Q-Q]PQLTWMVSGLHR
MSTRG.6419.1	synonymous	c.G618A	p.Q206Q	homozygous	NA	PIAPHLTIYQP[Q-Q]LTWMVSGLHR
MSTRG.6420.1	nonsynonymous	c.T515C	p.I172T	homozygous	nonconservative	AFVSGDFTEAGLVDN[I-T]DGLSHEDLLGIR
MSTRG.645.1	nonsynonymous	c.A1766G	p.D589G	homozygous	nonconservative	TDYHEIAVAL[D-G]GWGTALSK
MSTRG.6466.3	nonsynonymous	c.A465G	p.I155M	homozygous	conservative	DVDSAID[I-M]HTSNAAVCR
MSTRG.6476.1	nonsynonymous	c.C950T	p.T317I	homozygous	nonconservative	GVDGFHLAG[T-I]EYLAR
MSTRG.6476.1	nonsynonymous	c.G661A	p.V221I	homozygous	conservative	F[V-I]ISLPIATTSVEHDWFLK
MSTRG.6476.1	nonsynonymous	c.G661A	p.V221I	homozygous	conservative	[V-I]ISLPIATTSVEHDWFLK
MSTRG.6476.1	nonsynonymous	c.T121C	p.S41P	homozygous	nonconservative	TESYITAVSTNPL[S-P]PVHPSNNPVTFNK
MSTRG.6476.1	synonymous	c.T960G	p.L320L	homozygous	NA	GVDGFHLAGIEY[L-L]AR
MSTRG.6506.1	nonsynonymous	c.G277A	p.A93T	homozygous	nonconservative	NPWG[A-T]DIEGIQFTSSSIGK
MSTRG.6506.1	synonymous	c.C285A	p.I95I	homozygous	NA	NPWGTD[I-I]EGIQFTSSSIGK
MSTRG.6506.2	nonsynonymous	c.G277A	p.A93T	homozygous	nonconservative	NPWG[A-T]DIEGIQFTSSSIGK
MSTRG.6506.2	synonymous	c.C285A	p.I95I	homozygous	NA	NPWGTD[I-I]EGIQFTSSSIGK
MSTRG.6518.1	nonsynonymous	c.C116T	p.P39L	homozygous	conservative	GMPSIYGNMYNQ[P-L]PSYSYNR
MSTRG.6518.1	nonsynonymous	c.T114A	p.H38Q	homozygous	nonconservative	GMPSIYGNMYN[H-Q]LPSYSYNR
MSTRG.6518.1	synonymous	c.T93C	p.I31I	homozygous	NA	GMPS[I-I]YGNMYNQLPSYSYNR
MSTRG.6542.2	nonsynonymous	c.G506A	p.S169N	homozygous	conservative	VVGSIADYDPLNG[S-N]WGTAVQSR
MSTRG.6543.1	nonsynonymous	c.A2557G	p.T853A	homozygous	nonconservative	LDAIEQALYAAIH[T-A]SDTSHLIR
MSTRG.6543.1	synonymous	c.C2565T	p.D855D	homozygous	NA	LDAIEQALYAAIHAS[D-D]TSHLIR
MSTRG.6580.1	nonsynonymous	c.C583T	p.P195S	homozygous	nonconservative	NITALVNENV[P-S]PTSDSSVDAAQQTR
MSTRG.6580.1	nonsynonymous	c.G560C	p.S187T	homozygous	conservative	NI[S-T]ALVNENVSPTSDSSVDAAQQTR
MSTRG.6580.1	nonsynonymous	c.G622A	p.A208T	homozygous	nonconservative	NITALVNENVSPTSDSSVDAAQQ[A-T]R
MSTRG.6580.1	synonymous	c.C579T	p.N193N	homozygous	NA	NITALVNE[N-N]VSPTSDSSVDAAQQTR
MSTRG.6580.1	synonymous	c.T597C	p.D199D	homozygous	NA	NITALVNENVSPTS[D-D]SSVDAAQQTR
MSTRG.6598.1	nonsynonymous	c.T374C	p.L125P	homozygous	conservative	LSETSGVSQPH[L-P]TAHSSAAVPNDSR
MSTRG.6598.1	synonymous	c.T369G	p.P123P	homozygous	NA	LSETSGVSQ[P-P]HPTAHSSAAVPNDSR
MSTRG.6618.2	nonsynonymous	c.A302G	p.N101S	homozygous	conservative	DMGAD[N-S]GDIAEDDHVDDEDQK
MSTRG.6618.2	nonsynonymous	c.G119A	p.S40N	homozygous	conservative	RQEE[S-N]DLLQMDAETR
MSTRG.6618.2	synonymous	c.C309T	p.D103D	homozygous	NA	DMGADSG[D-D]IAEDDHVDDEDQK
MSTRG.6618.2	synonymous	c.C327T	p.H109H	homozygous	NA	DMGADSGDIAEDD[H-H]VDDEDQK
MSTRG.662.1	nonsynonymous	c.A1759G	p.T587A	homozygous	nonconservative	IC[T-A]SYGEPSHQMHASSGQSNR
MSTRG.662.1	nonsynonymous	c.A4084T	p.T1362S	homozygous	conservative	HQIT[T-S]SEGNNCVDTH
MSTRG.662.1	nonsynonymous	c.A4084T	p.T1362S	homozygous	conservative	HQIT[T-S]SEGNNCVDTHALSFHGLNLAK
MSTRG.662.1	nonsynonymous	c.A4535G	p.Y1512C	homozygous	conservative	LSLIHQNSTQSG[Y-C]CSQR
MSTRG.662.1	nonsynonymous	c.C2437G	p.Q813E	homozygous	nonconservative	ECLNVDSLLLTIPI[Q-E]DNSDAK
MSTRG.662.1	nonsynonymous	c.C3422T	p.T1141I	homozygous	nonconservative	VHETSGT[T-I]GSDQANVIPR
MSTRG.662.1	nonsynonymous	c.G3440A	p.S1147N	homozygous	conservative	VHETSGTIGSDQA[S-N]VIPR
MSTRG.662.1	synonymous	c.C3429T	p.S1143S	homozygous	NA	VHETSGTIG[S-S]DQANVIPR
MSTRG.662.1	synonymous	c.C4503G	p.S1501S	homozygous	NA	L[S-S]LIHQNSTQSGCCSQR
MSTRG.662.1	synonymous	c.G1764A	p.S588S	homozygous	NA	ICA[S-S]YGEPSHQMHASSGQSNR
MSTRG.662.1	synonymous	c.G2427C	p.T809T	homozygous	NA	ECLNVDSLLL[T-T]IPIEDNSDAK
MSTRG.662.1	synonymous	c.G4113A	p.T1371T	homozygous	NA	HQITSSEGNNCVD[T-T]H
MSTRG.662.1	synonymous	c.G4113A	p.T1371T	homozygous	NA	HQITSSEGNNCVD[T-T]HALSFHGLNLAK
MSTRG.662.1	synonymous	c.T4521C	p.S1507S	homozygous	NA	LSLIHQN[S-S]TQSGCCSQR
MSTRG.6629.1	nonsynonymous	c.A347C	p.K116T	homozygous	nonconservative	HIDVDPINVHILDGNTTDVE[K-T]ECR
MSTRG.6641.1	nonsynonymous	c.C827G	p.T276S	homozygous	conservative	EIDVATGA[T-S]SIGVHSGALTK
MSTRG.6641.1	synonymous	c.C834T	p.I278I	homozygous	NA	EIDVATGASS[I-I]GVHSGALTK
MSTRG.6652.1	nonsynonymous	c.A1969C	p.T657P	homozygous	nonconservative	VPFFDNMTVDLLQQ[T-P]SIR
MSTRG.6652.1	synonymous	c.A1932C	p.P644P	heterozygous	NA	V[P-P]FFDNMTVDLLQQPSIR
MSTRG.6652.1	synonymous	c.A1968G	p.Q656Q	homozygous	NA	VPFFDNMTVDLLQ[Q-Q]PSIR
MSTRG.6652.1	synonymous	c.C1938T	p.F646F	homozygous	NA	VPF[F-F]DNMTVDLLQQPSIR
MSTRG.6652.1	synonymous	c.C1950T	p.T650T	homozygous	NA	VPFFDNM[T-T]VDLLQQPSIR
MSTRG.6664.2	nonsynonymous	c.C1864T	p.P622S	homozygous	nonconservative	RLEAELVPDAI[P-S]LVDAVAPPDFVLNSALGTSDGSPYK
MSTRG.6664.2	nonsynonymous	c.G1918A	p.A640T	homozygous	nonconservative	RLEAELVPDAISLVDAVAPPDFVLNSALG[A-T]SDGSPYK
MSTRG.6664.2	synonymous	c.A1914G	p.L638L	homozygous	NA	RLEAELVPDAISLVDAVAPPDFVLNSA[L-L]GTSDGSPYK
[truncated: 2,510 more rows]
