# Supplementary material for: Identification of Novel Genes and Proteoforms in Angiostrongylus costaricensis through a Proteogenomic Approach
Source: Pathogens. 2022 Oct 31;11(11):1273. doi: 10.3390/pathogens11111273 (PMC9694666; doi:10.3390/pathogens11111273)
Supplement: Supplementary file 1 [file pathogens-11-01273-s001.zip › Supplemental_Data_S11.xlsx]

## Sheet: FPKM.labels
Supplemental Data S11. Normalized transcript levels (FPKM) of each quantified transcript
	FPKM
Transcript ID	Sample 1	Sample 2	Sample 3	Sample 4	Sample 5	Sample 6	Transcript Category	Mean
MSTRG.1.1	0	0	0	0	0.152965	0.154396	Novel transcript variants (BRAKER)	0.15368
MSTRG.10.1	0	0	0	13.7392	12.3686	21.8912	Novel transcript variants (BRAKER)	15.9997
MSTRG.100.1	150.106	204.463	159.085	528.655	901.613	462.09	Novel transcript variants (BRAKER)	401.002
MSTRG.10001.1	0	0	0	0.217188	0.211951	0	Novel transcripts (BRAKER)	0.21457
MSTRG.10002.1	4.04543	2.91596	3.76649	30.2234	56.3021	28.1807	Novel transcript variants (BRAKER)	20.9057
MSTRG.10004.1	14.6777	19.7103	15.8202	2.01078	1.62143	1.97135	Novel transcript variants (BRAKER)	9.30196
MSTRG.10006.1	0	0	0.0165655	0.0460245	0.0299433	0.0302233	Novel transcripts (BRAKER)	0.0306892
MSTRG.10006.2	0	0	0.0335962	0.140013	0.0607277	0.0612956	Novel transcripts (BRAKER)	0.0739081
MSTRG.10009.1	423.75	69.885	95.1249	2.63155	3.45771	2.98178	Novel transcript variants (BRAKER)	99.6384
MSTRG.1001.2	119.147	172.282	138.695	108.656	118.599	101.626	Transcripts from merged genes (BRAKER)	126.501
MSTRG.10010.1	0.145716	0	0.178511	38.1894	43.5608	27.8465	Novel transcript variants (BRAKER)	21.9842
MSTRG.10011.1	2.10319	0.76565	0.827039	16.9021	14.0438	13.116	Novel transcript variants (BRAKER)	7.95961
MSTRG.10012.1	5.24659	2.25948	5.68195	2.37026	1.87146	2.56898	Novel transcript variants (BRAKER)	3.33312
MSTRG.10012.3	5.07675	3.19872	8.61139	4.54139	4.32381	4.36425	Novel transcript variants (BRAKER)	5.01938
MSTRG.10013.2	11.9923	13.4434	18.4898	12.7773	6.39776	34.1923	Novel transcript variants (BRAKER)	16.2155
MSTRG.10013.3	12.3156	13.8058	18.9881	13.1217	6.57021	35.114	Novel transcript variants (BRAKER)	16.6526
MSTRG.10014.1	0.036981	0	0	0.12587	0.0204726	0.123984	Novel transcript variants (BRAKER)	0.076827
MSTRG.10015.1	1.88202	1.51746	2.30559	4.12035	3.25588	4.79804	Transcripts from merged genes (BRAKER)	2.97989
MSTRG.10015.2	3.66767	2.83249	3.47682	5.92963	6.05256	6.05061	Transcripts from merged genes (BRAKER)	4.6683
MSTRG.10015.3	4.89314	3.77891	4.63853	7.91089	8.0749	8.0723	Transcripts from merged genes (BRAKER)	6.22811
MSTRG.10016.1	4.84212	6.48127	8.56027	5.09165	5.31759	4.44344	Novel transcript variants (BRAKER)	5.78939
MSTRG.10017.1	8.16185	13.2667	14.7111	12.2784	11.8797	15.5367	Novel transcript variants (BRAKER)	12.6391
MSTRG.10019.1	41.9294	41.3518	33.8979	12.3737	15.816	11.4849	Novel transcript variants (BRAKER)	26.1423
MSTRG.1002.1	58.5779	177.557	140.261	5.9761	10.9377	4.485	Novel transcript variants (BRAKER)	66.2992
MSTRG.10020.1	35.6998	30.4255	35.7781	20.9647	26.6527	12.1281	Transcripts from merged genes (BRAKER)	26.9415
MSTRG.10021.1	81.2548	109.988	98.688	101.975	134.061	134.968	Novel transcript variants (BRAKER)	110.156
MSTRG.10022.1	16.0802	11.1328	9.22426	3.36641	1.27171	2.92376	Novel transcript variants (BRAKER)	7.33319
MSTRG.10023.1	152.936	241.395	166.377	137.095	240.76	117.776	Novel transcript variants (BRAKER)	176.056
MSTRG.10024.2	0.0950777	0.153706	0.0582381	0.826059	0.811684	0.782925	Novel transcript variants (BRAKER)	0.454615
MSTRG.10024.3	0.00524046	0	0.00320995	0.120398	0.145055	0.134699	Novel transcript variants (BRAKER)	0.0817205
MSTRG.10025.1	0.0447843	0	0.0274318	17.6819	19.1894	21.9213	Novel transcript variants (BRAKER)	11.773
MSTRG.10025.2	0.147924	0	0.0302027	34.5723	39.5257	42.9812	Novel transcript variants (BRAKER)	23.4515
MSTRG.10026.1	1.51792	1.10203	2.91611	7.39743	1.27957	12.4528	Novel transcripts (BRAKER)	4.4443
MSTRG.10027.1	0	0.0429935	0.0214342	0.774169	0.561785	1.2514	Novel transcript variants (BRAKER)	0.530356
MSTRG.10028.1	13.3927	18.3835	14.1836	6.4354	10.1473	5.34118	Transcripts from merged genes (BRAKER)	11.3139
MSTRG.10029.1	0.734059	0.46222	0.66321	0.538734	0.675595	0.522971	Novel transcript variants (BRAKER)	0.599465
MSTRG.1003.1	14.7651	29.678	33.5022	52.3648	68.1486	58.9174	Novel transcript variants (BRAKER)	42.896
MSTRG.10030.1	14.1706	29.2163	32.749	19.0902	19.9598	17.7328	Novel transcript variants (BRAKER)	22.1531
MSTRG.10031.1	2.11645	0.559216	1.9655	6.27414	1.94017	9.23206	Novel transcript variants (BRAKER)	3.68126
MSTRG.10031.2	3.3628	0.888532	3.12296	10.0305	3.12275	14.6687	Novel transcript variants (BRAKER)	5.86604
MSTRG.10032.1	0.773895	1.64568	1.9873	0.607861	0.362515	0.498961	Novel transcript variants (BRAKER)	0.979369
MSTRG.10032.2	0.803283	1.70817	2.06277	0.630944	0.376281	0.517909	Novel transcript variants (BRAKER)	1.01656
MSTRG.10033.1	0.979797	0.730889	0.900235	5.68716	1.87908	6.17877	Novel transcript variants (BRAKER)	2.72599
MSTRG.10034.1	122.413	122.207	98.3399	44.3063	66.7511	35.6227	Novel transcript variants (BRAKER)	81.6067
MSTRG.10035.1	0.0174964	0.0429935	0.0428683	0.0595515	0.0193719	0.0782123	Novel transcripts (BRAKER)	0.0434156
MSTRG.10036.1	14.9864	8.28653	6.60126	10.3943	18.871	9.0263	Novel transcript variants (BRAKER)	11.361
MSTRG.10037.1	212.427	271.581	216.138	168.935	174.826	179.8	Transcripts from merged genes (BRAKER)	203.951
MSTRG.10038.1	0.355017	0.472537	0.45304	0.478307	0.442208	0.330625	Novel transcript variants (BRAKER)	0.421956
MSTRG.10039.1	0	0.17136	0.256291	12.2238	14.4384	10.5989	Novel transcript variants (BRAKER)	7.53775
MSTRG.1004.2	11.2673	15.0883	16.8121	8.98665	14.8036	9.57253	Novel transcript variants (BRAKER)	12.7551
MSTRG.10040.1	0.0226519	0	0	25.0379	22.7978	31.4408	Novel transcripts (BRAKER)	19.8248
MSTRG.10042.1	146.649	269.933	237.263	0.173473	0.0376202	1.67077	Novel transcript variants (BRAKER)	109.288
MSTRG.10043.1	17.3781	21.4714	21.2295	0.913817	1.56738	1.20017	Novel transcript variants (BRAKER)	10.6267
MSTRG.10043.2	18.8116	24.1366	23.9935	1.0131	1.84553	1.46362	Novel transcript variants (BRAKER)	11.8773
MSTRG.10044.1	11.4862	13.8	13.573	4.41332	5.25776	4.35667	Novel transcripts (BRAKER)	8.81449
MSTRG.10045.1	11.5035	18.9401	18.0446	6.97593	7.05883	7.3878	Novel transcript variants (BRAKER)	11.6518
MSTRG.10046.1	0.691285	1.29489	1.60697	0.318218	0.464251	0.354611	Novel transcript variants (BRAKER)	0.788371
MSTRG.10047.1	87.5724	79.9277	84.1125	62.431	76.2642	62.2563	Novel transcripts (BRAKER)	75.4274
MSTRG.10047.2	14.7063	13.4225	14.1252	10.4842	12.8072	10.4549	Novel transcripts (BRAKER)	12.6667
MSTRG.10048.1	4.22806	3.57022	2.92885	5.41618	10.3329	4.14088	Novel transcript variants (BRAKER)	5.10285
MSTRG.10049.1	24.1658	24.1091	26.5405	42.483	37.6996	55.3093	Novel transcript variants (BRAKER)	35.0512
MSTRG.1005.1	28.4792	8.92532	19.3717	31.5564	10.2204	32.344	Novel transcript variants (BRAKER)	21.8162
MSTRG.10050.1	21.1531	29.1312	26.4122	15.4281	17.3081	14.4176	Novel transcript variants (BRAKER)	20.6417
MSTRG.10050.2	26.1303	35.9855	32.6269	19.0582	21.3806	17.81	Novel transcript variants (BRAKER)	25.4986
MSTRG.10053.1	0	0	0	0	0	0	Novel transcript variants (BRAKER)	#DIV/0!
MSTRG.10054.1	0.395262	0.194254	0.544749	2.1189	0.962792	2.51784	Novel transcript variants (BRAKER)	1.1223
MSTRG.10057.1	1.3861	4.03542	2.60246	0.589725	1.08429	0.606146	Novel transcript variants (BRAKER)	1.71736
MSTRG.10058.1	7.09519	17.4349	16.7583	6.30302	7.11732	7.13631	Novel transcript variants (BRAKER)	10.3075
MSTRG.1006.1	10.5859	9.7524	9.81566	6.26399	8.46125	4.91605	Transcripts from merged genes (BRAKER)	8.29921
MSTRG.10060.1	2.69285	0.612694	1.44582	7.55307	3.7361	6.72471	Novel transcript variants (BRAKER)	3.79421
MSTRG.10061.1	35.0976	41.0361	32.7607	32.2412	43.8565	29.0367	Novel transcript variants (BRAKER)	35.6715
MSTRG.10061.2	21.2255	29.1643	23.0414	22.8655	31.5191	20.3018	Novel transcript variants (BRAKER)	24.6863
MSTRG.10062.1	0.342561	0.631325	0.384687	0.0971629	0	0.255219	Novel transcripts (BRAKER)	0.342191
MSTRG.10064.1	36.024	54.6215	48.7771	10.6431	15.6816	8.69687	Novel transcript variants (BRAKER)	29.074
MSTRG.10065.1	0.672561	0.533119	0.451832	0.443063	0.564497	0.751621	Novel transcript variants (BRAKER)	0.569449
MSTRG.10065.2	0.74729	0.562737	0.502036	0.492292	0.627219	0.835134	Novel transcript variants (BRAKER)	0.627785
MSTRG.10065.4	0.360849	0.3202	0.356106	0.255876	0.399531	0.53769	Novel transcript variants (BRAKER)	0.371709
MSTRG.10066.1	37.6278	44.6654	39.3128	69.0904	54.1099	103.012	Novel transcript variants (BRAKER)	57.9697
MSTRG.10067.1	19.0672	16.3273	13.5894	16.9916	14.6033	22.3949	Novel transcript variants (BRAKER)	17.1623
MSTRG.10068.1	0	0	0.00351979	0.0220032	0.0206774	0.0353198	Novel transcript variants (BRAKER)	0.0203801
MSTRG.10068.2	0	0	0.0699431	0.437233	0.379282	0.829462	Novel transcript variants (BRAKER)	0.42898
MSTRG.1007.1	0.36981	0.36349	0.45304	6.92286	2.37482	12.8944	Novel transcript variants (BRAKER)	3.8964
MSTRG.10070.1	0	0	0	8.07342	5.48089	12.601	Novel transcripts (BRAKER)	8.71843
MSTRG.10071.1	0.858923	0.32374	0.580616	0.730867	0.676306	0.631003	Novel transcript variants (BRAKER)	0.633576
MSTRG.10071.2	15.412	5.80899	10.4182	13.1142	12.1352	11.3223	Novel transcript variants (BRAKER)	11.3685
MSTRG.10072.1	51.0066	14.9328	19.8524	29.952	25.5164	29.9857	Transcripts from merged genes (BRAKER)	28.541
MSTRG.10072.2	79.7656	23.3523	31.0458	46.8398	39.9033	46.8925	Transcripts from merged genes (BRAKER)	44.6332
MSTRG.10073.1	100.986	171.806	185.82	102.891	83.999	124.108	Novel transcript variants (BRAKER)	128.268
MSTRG.10074.1	0.0568717	0.0232916	0.0232238	0.129047	0.251872	0.0847427	Novel transcript variants (BRAKER)	0.0948416
MSTRG.10075.1	0	0	0	0.61595	0.893944	1.5557	Novel transcript variants (BRAKER)	1.02186
MSTRG.10076.1	13.8882	30.5229	22.629	37.6759	53.0327	32.2196	Novel transcript variants (BRAKER)	31.6614
MSTRG.10077.1	114.209	63.7143	63.5728	59.9052	49.001	27.8723	Transcripts from merged genes (BRAKER)	63.0457
MSTRG.10078.1	3.27164	2.77548	3.24454	1.12681	0.416857	0.812493	Novel transcript variants (BRAKER)	1.9413
MSTRG.10078.2	1.75985	1.49296	1.74527	0.606121	0.224232	0.437049	Novel transcript variants (BRAKER)	1.04425
MSTRG.1008.1	6.93368	12.5328	11.3133	2.81194	3.48344	1.76223	Novel transcript variants (BRAKER)	6.4729
MSTRG.10080.1	4.56164	5.04322	6.80578	27.7735	23.8324	37.0212	Novel transcript variants (BRAKER)	17.5063
MSTRG.10080.2	23.0237	25.4543	34.3504	140.18	120.288	186.855	Novel transcript variants (BRAKER)	88.3585
MSTRG.10081.1	59.9726	48.9034	72.0244	124.703	51.7907	305.617	Novel transcript variants (BRAKER)	110.502
MSTRG.10082.1	14.0544	26.363	20.799	25.2874	48.6429	21.8812	Novel transcript variants (BRAKER)	26.1713
MSTRG.10083.1	188.751	182.647	172.467	408.504	654.265	324.118	Transcripts from merged genes (BRAKER)	321.792
MSTRG.10083.4	7.36278	8.36873	7.25165	9.32861	11.2584	10.1857	Transcripts from merged genes (BRAKER)	8.95931
MSTRG.10085.1	0	0	0	0.154238	0.0836219	0.21945	Novel transcripts (BRAKER)	0.152437
MSTRG.10086.1	51.0953	49.5567	41.1101	22.3148	30.2982	18.6197	Novel transcript variants (BRAKER)	35.4992
MSTRG.10086.2	61.6202	59.7647	49.5782	26.9114	36.5392	22.4551	Novel transcript variants (BRAKER)	42.8115
MSTRG.10087.2	69.9129	48.3873	46.0673	69.2755	46.8565	86.1754	Novel transcript variants (BRAKER)	61.1125
MSTRG.10088.1	22.8904	7.97218	26.0458	119.231	52.6008	232.262	Novel transcript variants (BRAKER)	76.8337
MSTRG.10089.1	0.121531	0.39818	0.297766	2.27506	1.99595	1.40344	Novel transcript variants (BRAKER)	1.08199
MSTRG.1009.1	0.0278942	0.17136	0.30755	12.5561	4.69442	37.1585	Transcripts from merged genes (BRAKER)	9.15263
MSTRG.10090.1	0	0.0296177	0	0.0615365	0.0266902	0.0808194	Novel transcript variants (BRAKER)	0.049666
MSTRG.10091.1	14.0693	11.814	11.6893	7.93096	4.94756	9.49323	Novel transcript variants (BRAKER)	9.99072
MSTRG.10093.1	4.67492	6.69219	5.30087	6.12419	9.94284	5.18801	Novel transcript variants (BRAKER)	6.3205
MSTRG.10094.1	47.7859	33.8733	29.916	35.4721	26.9613	44.0352	Transcripts from merged genes (BRAKER)	36.3406
MSTRG.10095.1	42.8311	35.6953	39.4496	66.5264	40.0563	79.102	Novel transcript variants (BRAKER)	50.6101
MSTRG.10096.1	112.619	168.356	148.237	148.801	117.061	181.758	Transcripts from merged genes (BRAKER)	146.139
MSTRG.10097.1	88.4411	80.1359	69.3494	195.19	108.277	167.51	Novel transcript variants (BRAKER)	118.151
MSTRG.10098.2	14.0604	4.15218	7.38572	13.2777	7.94546	8.99893	Novel transcript variants (BRAKER)	9.30339
MSTRG.10099.1	0.133739	0.164318	0.159938	9.42376	15.6255	8.36267	Novel transcript variants (BRAKER)	5.64499
MSTRG.101.2	0	0	0	0.215218	0.437562	0.33919	Novel transcript variants (BRAKER)	0.330657
MSTRG.1010.1	42.7262	26.699	25.3995	20.9919	25.5128	18.8883	Novel transcript variants (BRAKER)	26.7029
MSTRG.10100.1	0	0	0.0144622	0.0301358	0.0457477	0.118737	Novel transcript variants (BRAKER)	0.0522707
MSTRG.10100.3	0	0.0348697	0.0347682	0	0.0628461	0.0317169	Novel transcript variants (BRAKER)	0.0410502
MSTRG.10101.1	14.2406	31.2327	46.7908	8.35566	2.54157	9.35875	Novel transcripts (BRAKER)	18.7534
MSTRG.10103.1	80.4815	90.0745	69.3563	18.5461	13.2028	19.768	Novel transcript variants (BRAKER)	48.5715
MSTRG.10104.1	17.591	15.2371	13.0916	4.34082	7.64457	2.35905	Novel transcript variants (BRAKER)	10.044
MSTRG.10105.1	95.3982	106.357	104.51	34.0209	45.6059	24.7307	Novel transcript variants (BRAKER)	68.4372
MSTRG.10105.2	11.7293	13.0767	12.8496	4.1829	5.60728	3.04066	Novel transcript variants (BRAKER)	8.41441
MSTRG.10107.1	26.7518	28.5675	31.1727	131.871	89.5282	196.319	Novel transcript variants (BRAKER)	84.0352
MSTRG.10108.1	25.4399	4.83944	8.48216	4.44018	3.52863	4.15105	Novel transcript variants (BRAKER)	8.48022
MSTRG.10109.2	106.653	218.882	164.816	13.3422	21.7555	10.1943	Transcripts from merged genes (BRAKER)	89.2738
MSTRG.10110.1	7.86177	3.81952	7.09747	1.53032	1.26585	1.49303	Novel transcripts (BRAKER)	3.84466
MSTRG.10111.1	0.981463	0.158666	0.427152	0.109887	0.0285966	0.0288641	Novel transcript variants (BRAKER)	0.289105
MSTRG.10112.1	2.45613	2.50215	2.59425	3.05637	4.1039	2.10709	Novel transcript variants (BRAKER)	2.80332
MSTRG.10113.1	0.155154	0.0346598	0.0475185	0.102018	0.0585635	0.0866965	Novel transcript variants (BRAKER)	0.0807684
MSTRG.10113.3	1.8516	0.413627	0.515529	0.931005	0.512521	0.752457	Novel transcript variants (BRAKER)	0.829456
MSTRG.10114.2	18.6039	47.7142	44.6184	25.3377	41.0762	22.7911	Novel transcript variants (BRAKER)	33.3569
MSTRG.10115.1	14.3207	17.3196	16.5827	19.1156	13.6911	24.8272	Novel transcript variants (BRAKER)	17.6428
MSTRG.10115.3	1.75734	3.89843	3.75253	4.81831	2.93208	5.80991	Novel transcript variants (BRAKER)	3.8281
MSTRG.10116.1	80.5002	89.4913	93.2901	107.392	51.116	145.21	Novel transcript variants (BRAKER)	94.5001
MSTRG.10117.1	0.153748	0	0	301.488	132.906	567.782	Novel transcripts (BRAKER)	250.582
MSTRG.10118.2	13.8998	6.81082	9.57835	5.98417	7.00787	2.95881	Novel transcript variants (BRAKER)	7.70664
MSTRG.10118.3	5.20692	2.55136	3.58808	2.24169	2.62517	1.10838	Novel transcript variants (BRAKER)	2.88693
MSTRG.10119.1	9.26132	4.26706	4.4201	6.10744	4.05891	5.13187	Novel transcript variants (BRAKER)	5.54112
MSTRG.10119.2	28.2303	13.0068	13.4733	18.6166	12.3723	15.6429	Novel transcript variants (BRAKER)	16.8904
MSTRG.10119.3	27.8942	12.852	13.3129	18.395	12.2894	15.4567	Novel transcript variants (BRAKER)	16.7
MSTRG.1012.1	33.3036	64.348	61.3243	38.878	59.4271	36.8106	Novel transcript variants (BRAKER)	49.0153
MSTRG.10120.1	0.241658	0.118764	0.0592092	0.0411259	0.0802688	0.0810195	Novel transcripts (BRAKER)	0.103674
MSTRG.10121.1	8.42891	2.30963	6.31442	5.88228	1.51065	5.48919	Novel transcript variants (BRAKER)	4.98918
MSTRG.10123.1	2.25796	2.21937	4.82099	2.1409	0.928572	1.51403	Novel transcript variants (BRAKER)	2.31364
MSTRG.10124.2	0.114321	0.140459	0.25209	1.80935	1.21512	3.04066	Novel transcript variants (BRAKER)	1.09533
MSTRG.10125.1	5.19985	3.46445	3.66794	3.79252	3.48288	3.84582	Novel transcript variants (BRAKER)	3.90891
MSTRG.10126.2	0	0	0	0.0296694	0.0579082	0.0324721	Novel transcript variants (BRAKER)	0.0400166
MSTRG.10127.1	565.927	1579.97	1214.27	360.819	606.234	292.041	Novel transcript variants (BRAKER)	769.875
MSTRG.10129.1	13.5833	17.2105	18.2004	13.8457	19.1908	8.53875	Novel transcript variants (BRAKER)	15.0949
MSTRG.1013.1	0.0148826	0.0182853	0	1.0131	0.856853	2.74429	Novel transcript variants (BRAKER)	0.929482
MSTRG.10130.1	75.9658	81.5783	66.102	102.653	178.308	82.239	Novel transcript variants (BRAKER)	97.8077
MSTRG.10131.1	0.191431	0.329279	0.257966	2.05242	0.805416	3.67966	Novel transcripts (BRAKER)	1.21936
MSTRG.10132.2	21.378	14.8883	11.7982	16.5473	22.6443	19.3375	Novel transcript variants (BRAKER)	17.7656
MSTRG.10133.1	0.0881533	0	0.0269983	1.12516	1.03703	0.738868	Novel transcript variants (BRAKER)	0.603242
MSTRG.10134.1	0	0	0	1.49806	1.30373	2.47853	Novel transcripts (BRAKER)	1.7601
MSTRG.10135.1	0	0	0	1.33764	1.96953	1.01709	Novel transcripts (BRAKER)	1.44142
MSTRG.10136.1	0	0	0	3.48964	4.37125	2.25737	Novel transcripts (BRAKER)	3.37275
MSTRG.10137.2	0	0	0.0470876	36.1079	46.9193	31.0137	Novel transcript variants (BRAKER)	28.522
MSTRG.10138.1	101.947	48.7825	53.9134	101.483	47.0867	183.433	Novel transcript variants (BRAKER)	89.4409
MSTRG.10139.1	182.309	139.408	152.73	320.935	151.872	535.07	Novel transcript variants (BRAKER)	247.054
MSTRG.1014.1	328.687	236.319	201.744	89.6629	98.8388	119.515	Novel transcript variants (BRAKER)	179.128
MSTRG.10140.1	44.3772	50.7565	36.375	18.5372	23.8971	18.3046	Novel transcripts (BRAKER)	32.0413
MSTRG.10141.2	0	0	0	106.958	144.025	125.1	Novel transcript variants (BRAKER)	125.361
MSTRG.10141.3	0	0	0	45.2515	60.9335	52.927	Novel transcript variants (BRAKER)	53.0373
MSTRG.10142.1	0.0530597	0.0651912	0	0.722385	1.40994	1.00805	Novel transcript variants (BRAKER)	0.651724
MSTRG.10142.2	0.0337819	0.0415058	0	0.459927	0.897677	0.641801	Novel transcript variants (BRAKER)	0.414939
MSTRG.10143.1	248.23	195.245	176.797	175.606	161.921	241.656	Novel transcript variants (BRAKER)	199.909
MSTRG.10144.1	71.374	70.8065	55.0404	37.3431	44.2876	42.6891	Novel transcript variants (BRAKER)	53.5901
MSTRG.10145.1	2.39396	2.81676	2.97574	1.69864	2.26206	1.51633	Novel transcript variants (BRAKER)	2.27725
MSTRG.10146.1	0.302693	0.0999136	0.0691825	41.8947	28.732	84.503	Novel transcript variants (BRAKER)	25.9336
MSTRG.10146.2	1.80696	0.629581	0.412993	250.852	172.146	505.897	Novel transcript variants (BRAKER)	155.291
MSTRG.10147.1	8.71857	8.40221	6.87576	0.510038	1.08598	0.974344	Novel transcript variants (BRAKER)	4.42782
MSTRG.10148.1	22.4573	31.9078	26.7993	29.8078	35.4729	40.6103	Novel transcript variants (BRAKER)	31.1759
MSTRG.10149.1	28.8958	24.7149	23.2382	38.3313	27.0601	53.9307	Novel transcript variants (BRAKER)	32.6952
MSTRG.1015.1	0.213398	0.196642	0.326783	638.265	407.986	1130.59	Novel transcript variants (BRAKER)	362.93
MSTRG.10150.1	7.50733	12.8414	13.6689	17.5379	21.743	13.2197	Novel transcripts (BRAKER)	14.4197
MSTRG.10152.1	23.7546	31.0534	24.8874	7.11355	8.23121	6.72931	Novel transcript variants (BRAKER)	16.9616
MSTRG.10153.1	1922.05	1314.16	987.452	846.11	1340.88	737.107	Novel transcript variants (BRAKER)	1191.29
MSTRG.10154.2	0.0280143	0.0172097	0	0.0595942	0.0542803	0.0626148	Novel transcript variants (BRAKER)	0.0443426
MSTRG.10156.1	10.3848	11.0019	7.88463	5.47655	8.24485	4.20441	Novel transcript variants (BRAKER)	7.8662
MSTRG.10157.1	0.0324351	0	0.0198675	0.275994	0.448901	0.398727	Novel transcripts (BRAKER)	0.235185
MSTRG.10158.2	0	0.0230234	0	0.0637806	0.207477	0.0837668	Novel transcript variants (BRAKER)	0.0945118
MSTRG.10159.1	52.1729	88.0156	58.7475	25.6984	41.9644	22.215	Novel transcript variants (BRAKER)	48.1356
MSTRG.1016.1	54.4474	42.4445	37.9508	31.9517	41.5751	29.7944	Novel transcript variants (BRAKER)	39.694
MSTRG.10160.2	274.893	187.732	170.686	283.554	545.881	199.152	Novel transcript variants (BRAKER)	276.983
MSTRG.10161.1	0.0714364	0	0.262542	54.6467	31.519	29.2192	Novel transcripts (BRAKER)	23.1438
MSTRG.10162.1	30.023	29.6723	25.2245	11.1807	17.474	13.2896	Novel transcript variants (BRAKER)	21.144
MSTRG.10162.2	23.4886	23.2142	19.7344	8.74723	13.6709	10.3972	Novel transcript variants (BRAKER)	16.5421
MSTRG.10162.4	2.47015	3.61301	3.63131	1.88168	2.27912	2.10325	Novel transcript variants (BRAKER)	2.66309
MSTRG.10162.5	35.2135	30.9277	22.1316	19.0763	29.1334	16.5369	Novel transcript variants (BRAKER)	25.5032
MSTRG.10162.6	28.4136	24.9555	17.8579	15.3926	23.5076	13.3436	Novel transcript variants (BRAKER)	20.5785
MSTRG.10163.1	0	0.0445918	0	43.2666	19.9916	102.373	Novel transcripts (BRAKER)	41.419
MSTRG.10164.1	0.341363	0.167765	0.104548	53.9692	62.4382	72.8265	Novel transcripts (BRAKER)	31.6413
MSTRG.10166.1	0	0.224209	0	32.7639	48.1378	37.1165	Novel transcript variants (BRAKER)	29.5606
MSTRG.10166.2	0	0.131334	0	21.5569	31.2746	24.1308	Novel transcript variants (BRAKER)	19.2734
MSTRG.10167.1	1.09287	0.71613	0.691732	2.26284	2.68221	2.48339	Novel transcript variants (BRAKER)	1.65486
MSTRG.10168.2	693.015	633.877	747.68	540.45	313.016	862.745	Novel transcript variants (BRAKER)	631.797
MSTRG.10169.1	303.574	171.041	126.914	149.522	215.17	151.627	Novel transcript variants (BRAKER)	186.308
MSTRG.1017.1	21.2253	28.5346	24.4308	20.0314	16.5555	21.8212	Novel transcript variants (BRAKER)	22.0998
MSTRG.10170.1	0.495224	0.260765	0.260006	0.48159	0.900794	1.50219	Novel transcript variants (BRAKER)	0.650094
MSTRG.10171.1	0	0	0.245759	0.739703	0.259132	0.747303	Novel transcript variants (BRAKER)	0.497974
MSTRG.10172.1	32.3805	26.3894	28.306	37.9373	24.907	42.9151	Novel transcripts (BRAKER)	32.1392
MSTRG.10173.1	2529.04	2168.77	1807.17	2415.1	1923.17	3238.31	Transcripts from merged genes (BRAKER)	2346.93
MSTRG.10174.1	0	0.0170144	0.0339298	0.0589179	0.0153327	0.0619042	Transcripts from merged genes (BRAKER)	0.0374198
MSTRG.10175.1	0.143838	0	0	0.0152991	0.00995352	0	Novel transcripts (BRAKER)	0.0563634
MSTRG.10176.1	0.215116	0.223639	0.182445	0.0563216	0.0641243	0.0924629	Novel transcripts (BRAKER)	0.139018
MSTRG.10177.1	0.0793738	0	0.0243095	1.41834	1.71371	3.0603	Novel transcript variants (BRAKER)	1.25921
MSTRG.10178.1	6.20733	4.03542	4.46664	8.51255	9.92541	4.17567	Novel transcript variants (BRAKER)	6.2205
MSTRG.10179.1	0.0523952	0.0858331	0.0427916	0.416115	0.261053	0.351326	Novel transcript variants (BRAKER)	0.201586
MSTRG.1018.1	22.6165	24.8705	25.7509	42.3209	36.1677	58.3958	Novel transcripts (BRAKER)	35.0204
MSTRG.10180.1	0.184207	0.226324	0.169249	1.56744	1.78459	0.720513	Novel transcript variants (BRAKER)	0.775387
MSTRG.10181.1	0.0402874	0.0329991	0.123386	1.23412	0.483232	3.21165	Novel transcript variants (BRAKER)	0.854279
MSTRG.10182.1	22.8427	41.3752	34.8486	4.64306	3.93141	4.21479	Transcripts from merged genes (BRAKER)	18.6426
MSTRG.10183.1	0.722679	0.134024	0.342438	0.0580128	0.0603884	0.121906	Novel transcript variants (BRAKER)	0.239908
MSTRG.10184.1	26.6628	38.8325	41.4446	40.6433	48.6771	54.1733	Novel transcript variants (BRAKER)	41.7389
MSTRG.10185.1	6.25112	4.74629	9.18531	13.9254	3.63558	16.9546	Novel transcript variants (BRAKER)	9.11639
MSTRG.10186.1	0.0557884	0.239904	0.0512583	0.498446	0.540476	0.77933	Novel transcript variants (BRAKER)	0.360867
MSTRG.10187.1	0	0	0	0.00888495	0.011561	0.0116691	Novel transcripts (BRAKER)	0.010705
MSTRG.10188.1	0.0908788	0.15951	0.341949	0	0	0.0290176	Novel transcripts (BRAKER)	0.155339
MSTRG.10189.1	0.0841636	0.31022	0.567081	2.57817	1.44438	1.22274	Novel transcript variants (BRAKER)	1.03446
MSTRG.1019.1	129.14	108.1	120.928	127.497	119.649	97.4769	Novel transcript variants (BRAKER)	117.132
MSTRG.10190.2	1.18144	0.765369	0.736826	1.44398	1.46268	1.80043	Novel transcript variants (BRAKER)	1.23179
MSTRG.10190.3	1.36632	0.885141	0.852131	1.66994	1.69157	2.08218	Novel transcript variants (BRAKER)	1.42455
MSTRG.10191.1	1.31077	1.0829	1.63346	3.94218	2.30203	2.87919	Novel transcript variants (BRAKER)	2.19176
MSTRG.10192.2	10.5766	9.87103	12.2094	28.5568	28.375	35.6868	Novel transcript variants (BRAKER)	20.8793
MSTRG.10192.3	14.505	13.5374	16.8298	39.1636	39.1459	49.0978	Novel transcript variants (BRAKER)	28.7133
MSTRG.10193.1	252.861	433.526	344.904	187.125	156.198	230.487	Novel transcript variants (BRAKER)	267.517
MSTRG.10193.2	60.5655	103.839	82.6118	44.8203	37.4126	55.2064	Novel transcript variants (BRAKER)	64.0759
MSTRG.10194.1	0	0.0273239	0	16.085	26.7283	16.3038	Novel transcript variants (BRAKER)	14.7861
MSTRG.10196.1	0.0160049	0	0.0343122	0.653699	0.32783	0.751223	Novel transcript variants (BRAKER)	0.356614
MSTRG.10196.2	0.0176812	0	0.0379061	0.722167	0.362166	0.829905	Novel transcript variants (BRAKER)	0.393965
MSTRG.10197.1	10.1888	8.55731	6.12917	1.86335	1.70056	1.42756	Novel transcripts (BRAKER)	4.97779
MSTRG.10198.1	5.26844	7.46042	7.56632	1.7476	2.75182	1.72973	Novel transcripts (BRAKER)	4.42072
MSTRG.10199.1	0.097265	0.14938	0.21597	0.258637	0.114422	0.217397	Novel transcript variants (BRAKER)	0.175512
MSTRG.10199.3	2.69073	3.16526	2.63004	1.6368	0.874735	1.65067	Novel transcript variants (BRAKER)	2.10804
MSTRG.102.1	35.8697	36.7068	36.2025	33.1508	17.3602	48.8216	Novel transcript variants (BRAKER)	34.6853
MSTRG.1020.1	3.38615	6.21016	7.16859	11.4516	9.41387	15.8687	Novel transcripts (BRAKER)	8.91652
MSTRG.10200.1	0.0983675	0.105751	0.0451899	5.93238	11.2248	5.30416	Novel transcript variants (BRAKER)	3.7851
MSTRG.10201.1	62.0236	16.8168	22.9825	979.136	1797.72	884.83	Novel transcript variants (BRAKER)	627.251
MSTRG.10202.1	17.2359	17.0302	17.6943	13.2304	13.612	11.6739	Novel transcript variants (BRAKER)	15.0794
MSTRG.10203.1	8.63648	5.42768	5.45247	1.74794	2.75129	1.40703	Novel transcript variants (BRAKER)	4.23715
MSTRG.10204.1	25.7302	22.6672	18.7435	7.72969	7.91921	8.94828	Novel transcript variants (BRAKER)	15.2897
MSTRG.10205.1	173.626	112.142	81.0329	24.1155	29.6873	19.074	Novel transcript variants (BRAKER)	73.2797
MSTRG.10205.3	73.2519	47.3264	48.2035	23.5629	26.9911	23.8711	Novel transcript variants (BRAKER)	40.5345
MSTRG.10207.1	20.9979	34.9152	34.3536	32.2584	50.1562	29.8112	Novel transcript variants (BRAKER)	33.7487
MSTRG.10208.1	5.45496	7.08025	4.59219	0.285642	0.139378	0.218838	Novel transcript variants (BRAKER)	2.96188
MSTRG.10209.1	0.719791	0.836125	1.02608	7.59473	3.93403	12.2708	Novel transcript variants (BRAKER)	4.39692
MSTRG.10209.2	2.17101	2.5219	3.09484	22.907	11.8657	37.0108	Novel transcript variants (BRAKER)	13.2619
MSTRG.1021.1	81.788	82.8346	67.9817	196.165	219.964	262.678	Novel transcripts (BRAKER)	151.902
MSTRG.10210.1	13.997	9.17068	10.766	29.7879	15.1269	46.114	Novel transcript variants (BRAKER)	20.8271
MSTRG.10210.2	11.8454	7.73591	9.094	25.0786	12.7354	38.8374	Novel transcript variants (BRAKER)	17.5545
MSTRG.10210.3	11.801	7.7069	9.0599	24.9846	12.6877	38.6918	Novel transcript variants (BRAKER)	17.4886
MSTRG.10210.4	11.6123	7.58367	8.91503	24.5851	12.4848	38.0731	Novel transcript variants (BRAKER)	17.209
MSTRG.10210.5	7.56474	4.94032	5.80763	16.0158	8.13313	24.8024	Novel transcript variants (BRAKER)	11.2107
MSTRG.10212.1	0.0160312	0	0	2.77596	2.55595	4.72077	Novel transcript variants (BRAKER)	2.51718
MSTRG.10213.1	0	0.14664	0.0292427	0.0812463	0	0	Novel transcripts (BRAKER)	0.0857098
MSTRG.10214.1	0.257537	0.0575308	0.301158	2.84883	0.544365	3.06125	Novel transcripts (BRAKER)	1.17845
MSTRG.10215.1	10.4966	16.9874	12.5479	1.82475	1.21841	3.34256	Novel transcript variants (BRAKER)	7.73627
MSTRG.10216.2	230.211	197.92	204.76	30.0729	56.9662	36.4415	Novel transcript variants (BRAKER)	126.062
MSTRG.10217.1	4.36016	11.1606	9.95721	1.3308	1.46926	1.6772	Novel transcript variants (BRAKER)	4.99253
MSTRG.10219.1	173.793	197.742	169.857	70.1094	103.357	48.0024	Novel transcript variants (BRAKER)	127.143
MSTRG.1022.2	99.9046	98.9311	92.9243	43.5132	33.0845	46.8203	Transcripts from merged genes (BRAKER)	69.1963
MSTRG.10220.1	0.655233	0.644037	0.923108	23.2497	24.7386	35.0019	Novel transcripts (BRAKER)	14.2021
MSTRG.10223.1	194.677	260.671	208.055	265.466	337.677	238.731	Novel transcript variants (BRAKER)	250.879
MSTRG.10224.1	85.7611	71.9711	56.8699	90.8931	62.2078	114.668	Novel transcript variants (BRAKER)	80.3952
MSTRG.10224.3	2.20454	1.75612	1.46906	2.0614	1.39478	2.11173	Novel transcript variants (BRAKER)	1.83294
MSTRG.10225.1	0	0	0	0.579588	0.100554	0.964194	Novel transcripts (BRAKER)	0.548112
MSTRG.10226.1	0.082504	0.0675785	0.117918	1.54448	0.761234	2.88901	Novel transcripts (BRAKER)	0.910454
MSTRG.10227.1	0.0290565	0.0713999	0	0.098898	0	0	Novel transcripts (BRAKER)	0.0664514
MSTRG.10228.1	74.2451	117.153	124.672	26.5838	22.9574	27.6402	Transcripts from merged genes (BRAKER)	65.5418
MSTRG.10228.3	0.123063	0	0.226139	1.72781	0.817527	1.10023	Transcripts from merged genes (BRAKER)	0.798953
MSTRG.10229.1	2.57768	4.75057	11.2892	3.61908	1.08809	4.86117	Novel transcripts (BRAKER)	4.69763
MSTRG.10231.1	0.92145	2.9651	2.02921	1.36279	1.68823	0.612956	Transcripts from merged genes (BRAKER)	1.59662
MSTRG.10232.1	0.086398	0.026538	0.0132304	0.128655	0.0358723	0.120693	Novel transcript variants (BRAKER)	0.0685644
MSTRG.10233.1	0.0221383	0	0	20.081	29.9284	18.3576	Novel transcripts (BRAKER)	17.0973
MSTRG.10235.1	0.0776895	0.0954524	0.142762	0.727176	0.215044	0.173644	Novel transcript variants (BRAKER)	0.238628
MSTRG.10236.1	4.71601	5.48932	9.22359	2.46407	2.29015	3.14374	Novel transcript variants (BRAKER)	4.55448
MSTRG.10236.2	1.3507	1.57218	2.64171	0.705728	0.669036	0.953355	Novel transcript variants (BRAKER)	1.31545
MSTRG.10237.1	54.7587	40.1492	39.1756	46.9381	10.9584	48.3915	Novel transcript variants (BRAKER)	40.0619
MSTRG.10238.1	0	0	0.0204799	13.6845	11.3463	12.3305	Novel transcript variants (BRAKER)	9.34544
MSTRG.10239.1	9.11543	3.54959	3.63079	1.27155	1.02029	0.77933	Novel transcript variants (BRAKER)	3.22783
MSTRG.10239.3	1.69936	0.695966	0.91845	0.255177	0.276694	0.111713	Novel transcript variants (BRAKER)	0.65956
MSTRG.10239.4	1.09191	0.473494	0.491787	0.163962	0.213346	0.0717804	Novel transcript variants (BRAKER)	0.417714
MSTRG.1024.2	0.188657	0	0	0.120398	0.02611	0.158125	Novel transcript variants (BRAKER)	0.123322
MSTRG.10244.1	0.0266021	0	0	21.5042	37.1117	20.4834	Novel transcripts (BRAKER)	19.7815
MSTRG.10245.1	203.208	256.676	211.104	81.4569	122.683	49.9185	Transcripts from merged genes (BRAKER)	154.174
MSTRG.10245.2	102.971	130.064	106.972	41.2764	62.1669	25.295	Transcripts from merged genes (BRAKER)	78.1243
MSTRG.1025.1	177.206	110.49	74.0815	47.7319	71.1938	46.2291	Novel transcripts (BRAKER)	87.8221
MSTRG.10250.1	0.121029	0	0	69.3087	41.8981	134.94	Novel transcripts (BRAKER)	61.567
MSTRG.10252.1	13.2444	13.018	9.45695	2.76914	3.98025	2.11446	Novel transcript variants (BRAKER)	7.43053
MSTRG.10253.1	5.37342	4.37034	4.51214	4.57231	4.31543	4.25712	Novel transcript variants (BRAKER)	4.56679
MSTRG.10254.1	0.421424	0.805432	1.43408	4.36289	0.453637	4.21249	Novel transcript variants (BRAKER)	1.94833
MSTRG.10255.1	5.44375	14.2875	12.4456	9.6775	12.5498	12.453	Novel transcripts (BRAKER)	11.1428
MSTRG.10255.2	12.6031	33.0776	28.8134	22.4049	29.0547	28.8305	Novel transcripts (BRAKER)	25.7974
MSTRG.10256.1	0.263864	0.324194	0.0808126	0.44905	0.146075	0.147441	Novel transcripts (BRAKER)	0.235239
MSTRG.10257.1	0	0	0.0394294	0.529485	0.1663	0.911217	Novel transcripts (BRAKER)	0.411608
MSTRG.10258.2	0.439076	0.222133	0.316409	1.20875	1.45843	1.01024	Novel transcript variants (BRAKER)	0.77584
MSTRG.10259.1	18.0785	32.3242	27.1192	32.2154	44.715	25.7224	Novel transcript variants (BRAKER)	30.0291
MSTRG.1026.1	138.474	149.093	108.977	62.5873	102.553	59.2687	Novel transcript variants (BRAKER)	103.492
MSTRG.10260.1	5.64129	10.1281	10.6214	28.4295	10.3486	15.2376	Transcripts from merged genes (BRAKER)	13.4011
MSTRG.10261.1	290.585	189.481	224.811	191.978	94.9261	307.654	Novel transcript variants (BRAKER)	216.572
MSTRG.10262.1	0.258052	0.317053	0.158065	18.6643	23.6429	18.0242	Novel transcript variants (BRAKER)	10.1774
MSTRG.10262.2	0.0845279	0.103854	0.051776	6.11369	7.74449	5.90402	Novel transcript variants (BRAKER)	3.33373
MSTRG.10263.1	1.48567	0.52153	0.585013	68.3557	47.1154	123.693	Novel transcripts (BRAKER)	40.2928
MSTRG.10265.2	8.34921	9.83212	9.16627	2.83724	5.27186	1.87806	Novel transcript variants (BRAKER)	6.22246
MSTRG.10265.3	16.4196	15.4911	12.8077	6.13062	9.88465	4.43426	Novel transcript variants (BRAKER)	10.8613
MSTRG.10266.1	2.19773	1.35011	1.7345	0.395592	0.608328	0.755714	Novel transcripts (BRAKER)	1.17366
MSTRG.10267.1	0.762733	0.702843	0.654077	0.292058	0.232236	0.554055	Novel transcript variants (BRAKER)	0.533
MSTRG.10267.2	0.743202	0.705599	0.600082	0.287454	0.261822	0.566295	Novel transcript variants (BRAKER)	0.527409
MSTRG.10268.1	0	0	0	0	0	0	Novel transcripts (BRAKER)	#DIV/0!
MSTRG.10269.2	0.0333207	0	0.04082	0.085059	0.0368926	0.0744752	Novel transcript variants (BRAKER)	0.0541135
MSTRG.1027.1	55.3321	48.1073	41.0089	73.9778	108.537	65.8955	Novel transcript variants (BRAKER)	65.4765
MSTRG.10270.1	14.6667	19.1378	19.1636	9.15705	7.70179	7.24068	Novel transcript variants (BRAKER)	12.8446
MSTRG.10272.1	0	0	0	0	0	0	Novel transcript variants (BRAKER)	#DIV/0!
MSTRG.10273.1	0.0177616	0.0145484	0.00725304	0.0554164	0.0950504	0.105864	Novel transcript variants (BRAKER)	0.0493157
MSTRG.10274.1	0.00588841	0.00723473	0.00360683	14.8912	20.0217	18.0703	Novel transcript variants (BRAKER)	8.83334
MSTRG.10274.2	0.00588131	0.00722601	0.00360249	14.8733	19.9976	18.0485	Novel transcript variants (BRAKER)	8.82269
MSTRG.10275.1	0.367463	0.265576	0.331004	0.827677	0.394887	0.483127	Novel transcripts (BRAKER)	0.444956
MSTRG.10276.1	12.1129	9.28799	7.10724	2.57301	3.65941	2.08258	Novel transcript variants (BRAKER)	6.13719
MSTRG.10278.1	2.81818	3.88298	5.79518	0.839307	1.00295	1.30478	Novel transcript variants (BRAKER)	2.60723
MSTRG.10279.1	22.5785	57.6803	59.2533	57.9505	68.8051	59.5232	Novel transcript variants (BRAKER)	54.2985
MSTRG.1028.1	228.61	345.845	277	252.081	370.334	285.684	Transcripts from merged genes (BRAKER)	293.259
MSTRG.10280.1	0.939914	1.3597	1.1886	6.84976	3.14718	12.3507	Novel transcript variants (BRAKER)	4.30597
MSTRG.10280.2	0.752866	1.08911	0.952061	5.48662	2.52088	9.89284	Novel transcript variants (BRAKER)	3.44906
MSTRG.10281.1	7.92944	10.2398	9.75782	2.37066	3.00558	1.57006	Novel transcript variants (BRAKER)	5.81223
MSTRG.10282.1	0	0	0	0.528015	0.274818	1.87237	Novel transcripts (BRAKER)	0.891736
MSTRG.10283.1	116.246	144.044	122.035	11.1939	10.9469	7.02718	Novel transcript variants (BRAKER)	68.5821
MSTRG.10284.1	3.44906	3.72693	3.95693	3.0878	1.99025	2.96307	Novel transcripts (BRAKER)	3.19567
MSTRG.10285.1	8.16044	10.7943	9.99009	10.7735	8.66398	14.3273	Novel transcript variants (BRAKER)	10.4516
MSTRG.10286.1	89.4475	109.213	81.6146	79.9096	112.007	94.0392	Novel transcript variants (BRAKER)	94.3719
MSTRG.10287.1	68.2505	63.4031	70.5569	12.9094	7.54334	22.6959	Novel transcript variants (BRAKER)	40.8932
MSTRG.10289.2	0.715981	3.32325	4.5318	6.21647	5.54178	7.67547	Novel transcript variants (BRAKER)	4.66746
MSTRG.1029.1	4.84828	5.46719	9.68212	20.6273	7.90493	30.431	Novel transcript variants (BRAKER)	13.1601
MSTRG.10290.1	0	0	0	0.0994902	0.0323639	0.0653331	Novel transcripts (BRAKER)	0.065729
MSTRG.10291.1	32.1313	35.9855	43.7534	46.0589	29.8972	40.0516	Novel transcript variants (BRAKER)	37.9797
MSTRG.10292.1	61.7477	90.4312	73.2372	53.6746	89.4945	42.1547	Novel transcript variants (BRAKER)	68.4566
MSTRG.10293.1	79.7233	99.145	81.2278	50.1595	49.0015	63.7573	Novel transcript variants (BRAKER)	70.5024
MSTRG.10293.3	56.1952	90.2495	62.9338	18.2961	29.0506	15.5217	Novel transcript variants (BRAKER)	45.3745
MSTRG.10294.1	0.0199652	0	0	0.152897	0.16579	0.223121	Novel transcript variants (BRAKER)	0.140444
MSTRG.10295.1	0.0183515	0	0	44.1137	37.559	72.2931	Novel transcript variants (BRAKER)	38.4961
MSTRG.10295.2	0.0735903	0	0	176.898	150.614	289.899	Novel transcript variants (BRAKER)	154.371
MSTRG.10296.1	0	0.0129119	0	36.1986	14.3584	78.3239	Novel transcript variants (BRAKER)	32.2235
MSTRG.10297.1	6.28903	2.03109	2.04719	1.14163	1.21358	1.23163	Novel transcript variants (BRAKER)	2.32569
MSTRG.10298.1	7.06198	4.18276	3.32612	0	0.140181	0	Novel transcripts (BRAKER)	3.67776
MSTRG.10299.1	0.289036	0.157831	0.196715	3.08796	3.92912	3.05067	Novel transcript variants (BRAKER)	1.78522
MSTRG.1030.2	1.53303	0.693936	1.13672	0.755221	0.670012	0.360682	Novel transcript variants (BRAKER)	0.858267
MSTRG.10301.1	68.1229	104.262	230.582	95.9063	32.7905	218.31	Novel transcripts (BRAKER)	124.996
MSTRG.10302.1	8.17979	13.9172	14.1307	2.32544	3.0467	1.5376	Novel transcript variants (BRAKER)	7.18956
MSTRG.10303.1	0	0	0.0660788	0.0917948	0.0895817	0.120559	Novel transcript variants (BRAKER)	0.0920037
MSTRG.10304.1	0	0	0.0088726	0.0616278	0.0400947	0.129503	Novel transcript variants (BRAKER)	0.0600245
MSTRG.10304.2	0	0	0.0181216	0.12587	0.0982684	0.2645	Novel transcript variants (BRAKER)	0.12669
MSTRG.10305.1	0	0	0	3.18773	3.33084	3.5523	Novel transcript variants (BRAKER)	3.35696
MSTRG.10306.1	14.7686	11.2328	6.00547	1.83045	4.4429	1.15579	Transcripts from merged genes (BRAKER)	6.57266
MSTRG.10307.1	4.49015	5.36493	2.85129	0.946416	1.96122	0.920728	Novel transcript variants (BRAKER)	2.75579
MSTRG.10308.1	1.25441	1.17084	1.09596	2.04376	1.51807	2.10823	Novel transcript variants (BRAKER)	1.53188
MSTRG.10309.2	5.45293	9.06779	9.33209	5.65367	7.72645	4.22137	Novel transcript variants (BRAKER)	6.90905
MSTRG.10309.3	59.1009	98.7032	102.132	61.5937	84.4301	45.9415	Novel transcript variants (BRAKER)	75.3169
MSTRG.1031.1	7.13448	2.70221	5.25726	17.2082	10.1562	14.8672	Novel transcripts (BRAKER)	9.55427
MSTRG.1031.2	1.71756	0.650532	1.27355	4.15371	2.50221	3.59358	Novel transcripts (BRAKER)	2.31519
MSTRG.10311.1	24.6969	19.965	19.4556	11.3303	13.5629	14.2044	Novel transcript variants (BRAKER)	17.2025
MSTRG.10312.1	62.5832	43.8505	42.4962	84.3524	61.3332	108.747	Novel transcript variants (BRAKER)	67.227
MSTRG.10313.1	5.10161	3.78628	3.47387	4.56137	8.30068	5.03567	Novel transcripts (BRAKER)	5.04325
MSTRG.10314.1	88.5148	52.2268	34.0748	54.5037	86.9186	56.7376	Novel transcript variants (BRAKER)	62.1627
MSTRG.10315.1	25.7338	54.3983	63.2688	64.6676	33.2915	112.774	Novel transcript variants (BRAKER)	59.0223
MSTRG.10316.1	22.5207	17.8088	19.8665	15.6465	20.1767	15.3619	Novel transcript variants (BRAKER)	18.5635
MSTRG.10317.1	0.932871	0.592843	0.857119	5.43336	10.3821	3.72076	Transcripts from merged genes (BRAKER)	3.65318
MSTRG.10317.2	0.779962	0.462624	0.716627	3.90197	7.78703	2.35946	Transcripts from merged genes (BRAKER)	2.66795
MSTRG.10317.3	0.769365	0.456338	0.706891	4.24401	8.16589	2.66836	Transcripts from merged genes (BRAKER)	2.83514
MSTRG.10317.4	3.47394	2.06052	3.19185	19.1631	36.8718	12.0485	Transcripts from merged genes (BRAKER)	12.8016
MSTRG.10319.1	65.2453	57.7817	49.3725	59.3677	94.122	44.0417	Transcripts from merged genes (BRAKER)	61.6551
MSTRG.10319.2	56.8122	50.0225	42.9424	51.7889	81.9339	38.3032	Transcripts from merged genes (BRAKER)	53.6339
MSTRG.10319.3	3.32099	2.94854	2.51307	3.03213	4.80088	2.24172	Transcripts from merged genes (BRAKER)	3.14289
MSTRG.1032.1	0.241176	0.153857	0.238637	0.461743	0.385138	0.326541	Transcripts from merged genes (BRAKER)	0.301182
MSTRG.1032.4	0.189941	0.126686	0.219393	0.429456	0.402578	0.297176	Transcripts from merged genes (BRAKER)	0.277539
MSTRG.10320.1	0	0	0	0	0	0	Novel transcript variants (BRAKER)	#DIV/0!
MSTRG.10322.1	1.51971	0.509229	0.31029	0.548604	0.560872	0.514652	Novel transcript variants (BRAKER)	0.660559
MSTRG.10322.2	3.25433	1.0584	0.644916	1.14024	1.21872	1.06967	Novel transcript variants (BRAKER)	1.39771
MSTRG.10323.1	0	0	0	1.23728	0.574975	2.16665	Novel transcripts (BRAKER)	1.3263
MSTRG.10324.1	0.0762733	0.0468562	0.0467198	76.7139	113.774	82.5542	Novel transcript variants (BRAKER)	45.5354
MSTRG.10325.2	32.3098	29.9611	26.8704	24.587	29.2051	26.8118	Novel transcript variants (BRAKER)	28.2908
MSTRG.10326.1	856.487	632.194	545.723	677.288	533.861	1076.49	Novel transcript variants (BRAKER)	720.34
MSTRG.10327.2	39.7929	44.0716	43.9433	56.8911	34.19	70.6755	Novel transcript variants (BRAKER)	48.2607
MSTRG.10328.1	0	0	0	0.652986	0.377625	1.28641	Novel transcripts (BRAKER)	0.772339
MSTRG.10329.1	1.00501	0.705599	0.659573	4.33697	4.21254	7.86207	Novel transcript variants (BRAKER)	3.13029
MSTRG.10330.1	835.009	629.006	636.783	527.008	373.111	651.818	Novel transcript variants (BRAKER)	608.789
MSTRG.10331.1	4.39843	1.37445	2.69417	2.76914	0.872644	2.3867	Novel transcripts (BRAKER)	2.41592
MSTRG.10333.1	23.8332	30.4584	29.329	14.3344	14.5584	16.8205	Novel transcript variants (BRAKER)	21.5556
MSTRG.10334.2	7.68966	5.38493	7.31441	9.62501	3.92281	17.4805	Transcripts from merged genes (BRAKER)	8.56955
MSTRG.10335.1	0.112867	0.624027	1.27899	1.39257	0.43738	1.89202	Novel transcript variants (BRAKER)	0.956308
MSTRG.10336.1	0.00292963	0	0	0.0186964	0.00567642	0.013096	Novel transcript variants (BRAKER)	0.0100996
MSTRG.10338.1	0.00144465	0	0	0.0147513	0.000799758	0.0193737	Novel transcripts (BRAKER)	0.00909235
MSTRG.10339.1	0.128173	0.0841076	0.214118	1.60621	0.437832	1.56099	Novel transcripts (BRAKER)	0.671904
MSTRG.1034.1	58.9224	63.9978	51.4643	16.566	11.2546	16.6868	Novel transcript variants (BRAKER)	36.482
MSTRG.1034.2	18.0307	19.6029	15.7638	5.07427	3.43762	5.09162	Novel transcript variants (BRAKER)	11.1668
MSTRG.10340.1	22.0728	7.6491	8.77519	16.7955	17.5067	15.4962	Novel transcript variants (BRAKER)	14.7159
MSTRG.10340.3	10.7062	3.4969	4.06446	6.33617	6.47656	5.41833	Novel transcript variants (BRAKER)	6.0831
MSTRG.10340.4	0.263218	0.2352	0.249172	2.34155	2.63615	2.7544	Novel transcript variants (BRAKER)	1.41328
MSTRG.10341.1	38.3708	10.1355	9.50331	41.1508	32.7638	39.4136	Novel transcript variants (BRAKER)	28.5563
MSTRG.10343.1	182.262	127.25	105.103	191.872	193.155	210.687	Novel transcripts (BRAKER)	168.388
MSTRG.10344.1	25.9146	56.6316	42.04	17.9165	22.8644	18.2514	Novel transcript variants (BRAKER)	30.6031
MSTRG.10345.1	128.534	119.862	122.84	64.648	60.6309	68.8272	Novel transcript variants (BRAKER)	94.2236
MSTRG.10346.1	97.219	54.7353	37.5839	43.7417	63.7027	40.5706	Novel transcript variants (BRAKER)	56.2589
MSTRG.10348.1	68.8711	107.918	123.691	98.654	33.4819	123.224	Novel transcript variants (BRAKER)	92.6401
MSTRG.10349.1	15.9174	29.1225	24.4353	25.1536	37.505	21.1307	Novel transcript variants (BRAKER)	25.5441
MSTRG.10350.1	0.0437802	0.026895	0	1.06171	0.666507	1.22316	Novel transcript variants (BRAKER)	0.604411
MSTRG.10351.1	20.3735	37.3162	30.5064	22.9055	17.3352	30.6094	Novel transcript variants (BRAKER)	26.5077
MSTRG.10352.1	0.509714	1.05982	1.03271	1.55139	0.933353	2.7167	Novel transcripts (BRAKER)	1.30061
MSTRG.10353.2	0	0	0	0.345646	0.294664	0.203498	Novel transcript variants (BRAKER)	0.28127
MSTRG.10354.1	0.0234875	0.0144288	0.00719342	18.267	27.9362	18.0983	Novel transcript variants (BRAKER)	10.7244
MSTRG.10355.1	0	0.0153982	0.00767668	0.629189	0.485665	0.854362	Novel transcripts (BRAKER)	0.398458
MSTRG.10356.1	2.74144	2.84902	3.01993	3.76185	4.43299	3.52385	Transcripts from merged genes (BRAKER)	3.38818
MSTRG.10357.1	4.89924	7.6333	7.96988	20.2852	16.1455	27.6535	Novel transcript variants (BRAKER)	14.0978
MSTRG.10357.2	18.1793	28.0232	29.282	75.4472	57.1461	102.945	Novel transcript variants (BRAKER)	51.8372
MSTRG.10357.4	31.1832	48.5178	50.5634	129.447	97.3261	176.361	Novel transcript variants (BRAKER)	88.8998
MSTRG.10359.1	22.9087	18.2821	18.3732	21.2605	21.9983	25.9606	Novel transcript variants (BRAKER)	21.4639
MSTRG.1036.1	0.0603896	0	0.0123302	178.378	121.078	325.204	Novel transcript variants (BRAKER)	124.947
MSTRG.10360.1	49.1881	36.4232	50.283	59.8698	22.9339	109.116	Novel transcript variants (BRAKER)	54.6356
MSTRG.10361.1	72.9425	122.32	111.185	87.4132	141.729	91.6631	Novel transcript variants (BRAKER)	104.542
MSTRG.10362.1	192.842	318.729	239.148	305.239	242.648	398.601	Novel transcript variants (BRAKER)	282.868
MSTRG.10362.2	34.0119	56.2148	42.179	53.8494	42.7963	70.302	Novel transcript variants (BRAKER)	49.8922
MSTRG.10363.1	0.0254576	0	0.00779678	0.649864	0.866735	0.455202	Novel transcript variants (BRAKER)	0.401011
MSTRG.10363.2	0.0276833	0	0.0113046	0.902981	1.27712	0.773437	Novel transcript variants (BRAKER)	0.598505
MSTRG.10363.3	0.0983951	0	0.0401801	3.20948	4.53927	2.74904	Novel transcript variants (BRAKER)	2.12727
MSTRG.10363.5	0.0488149	0	0.00996689	0.913817	1.34218	0.836481	Novel transcript variants (BRAKER)	0.630253
MSTRG.10364.1	0.0960687	0.0295084	0.132401	0.500694	0.764511	0.65759	Novel transcript variants (BRAKER)	0.363462
MSTRG.10365.1	11.2104	18.5648	18.059	0.556966	0.709407	0.535743	Novel transcript variants (BRAKER)	8.27271
MSTRG.10366.1	72.7147	80.6076	78.8421	83.606	76.7476	110.677	Transcripts from merged genes (BRAKER)	83.8659
MSTRG.10366.2	94.0412	80.2705	82.4612	102.204	78.705	138.358	Transcripts from merged genes (BRAKER)	96.0067
MSTRG.10366.4	149.125	90.0815	90.8745	135.199	114.348	159.06	Transcripts from merged genes (BRAKER)	123.115
MSTRG.10367.1	90.0969	58.3928	43.7126	31.1212	58.4647	24.3135	Novel transcript variants (BRAKER)	51.017
MSTRG.10368.2	4.42906	8.01629	8.54721	4.33607	7.93577	4.41747	Novel transcript variants (BRAKER)	6.28031
MSTRG.10368.3	274.821	223.97	163.606	106.509	160.691	108.129	Novel transcript variants (BRAKER)	172.954
MSTRG.10369.1	90.5294	147.214	128.029	307.904	533.598	265.029	Novel transcript variants (BRAKER)	245.384
MSTRG.10369.2	35.0642	57.0193	49.5888	119.258	206.675	102.652	Novel transcript variants (BRAKER)	95.043
MSTRG.1037.1	15.4325	20.0099	24.953	14.8826	3.72032	22.1637	Novel transcript variants (BRAKER)	16.8603
MSTRG.10370.1	0	0	0.0521523	11.6884	4.80773	20.1402	Novel transcript variants (BRAKER)	9.17212
MSTRG.10371.2	0.976298	0.810485	1.293	1.97582	1.54839	1.68083	Novel transcript variants (BRAKER)	1.3808
MSTRG.10372.1	45.5606	74.9376	70.7327	23.3144	39.1409	14.7235	Novel transcript variants (BRAKER)	44.735
MSTRG.10373.1	215.428	258.212	272.962	265.401	217.115	348.709	Transcripts from merged genes (BRAKER)	262.971
MSTRG.10373.2	49.3644	59.1682	62.548	60.8154	49.751	79.9052	Transcripts from merged genes (BRAKER)	60.2587
MSTRG.10374.1	47.4926	53.8294	40.4975	26.9101	46.52	20.9346	Novel transcript variants (BRAKER)	39.364
MSTRG.10375.2	0.342561	0.38581	0.227315	0.631559	0.647939	0.478536	Novel transcript variants (BRAKER)	0.452287
MSTRG.10376.2	0.198704	0.0976541	0.178511	0.552326	0.35934	0.755009	Novel transcript variants (BRAKER)	0.356924
MSTRG.10376.3	0.0307012	0.0377207	0	3.70961	4.52097	4.25446	Novel transcript variants (BRAKER)	2.51069
MSTRG.10376.4	0.0282167	0.0346682	0	6.48268	10.7158	7.72573	Novel transcript variants (BRAKER)	4.99742
MSTRG.10376.5	0.0245301	0.0301386	0	6.72109	11.0404	7.62099	Novel transcript variants (BRAKER)	5.08742
MSTRG.10376.6	0.117626	0	0	21.219	39.7218	24.4503	Novel transcript variants (BRAKER)	21.3772
MSTRG.10378.1	13.7418	10.8283	12.9404	20.845	11.6858	30.0353	Transcripts from merged genes (BRAKER)	16.6794
MSTRG.10378.4	7.21194	4.07695	5.07548	8.09526	8.12307	9.34584	Transcripts from merged genes (BRAKER)	6.98809
MSTRG.1038.1	5.93589	21.1115	15.963	0.731054	0.720635	1.10561	Novel transcript variants (BRAKER)	7.59461
MSTRG.10380.2	4.74956	1.9992	1.91256	6.2867	2.89715	4.52152	Novel transcript variants (BRAKER)	3.72778
MSTRG.10381.2	43.9895	40.4435	35.4913	16.9013	25.3258	17.3901	Novel transcript variants (BRAKER)	29.9236
MSTRG.10381.3	15.11	13.9892	12.2377	5.81306	8.68523	5.96147	Novel transcript variants (BRAKER)	10.2994
MSTRG.10382.1	18.9825	32.7423	25.9892	45.3027	25.541	74.7692	Novel transcript variants (BRAKER)	37.2212
MSTRG.10383.1	11.265	6.45894	7.29445	26.3829	8.90895	32.1324	Novel transcripts (BRAKER)	15.4071
MSTRG.10384.1	51.0116	58.8364	44.552	38.1726	59.9929	30.6588	Transcripts from merged genes (BRAKER)	47.204
MSTRG.10384.2	42.7283	49.2355	37.282	31.9436	50.2032	25.6559	Transcripts from merged genes (BRAKER)	39.5081
MSTRG.10385.1	355.746	286.71	212.18	42.4916	56.7845	41.5532	Transcripts from merged genes (BRAKER)	165.911
MSTRG.10385.2	224.476	187.343	141.505	26.8252	36.1427	25.7448	Transcripts from merged genes (BRAKER)	107.006
MSTRG.10387.2	1.5716	0.555874	0.612599	1.31703	1.30505	0.931394	Novel transcript variants (BRAKER)	1.04893
MSTRG.10388.2	8.01018	11.8501	11.2649	1.78513	2.42837	1.55286	Novel transcript variants (BRAKER)	6.14859
MSTRG.10388.3	4.77613	7.46463	7.02343	1.12061	1.55533	0.981171	Novel transcript variants (BRAKER)	3.82022
MSTRG.10389.1	6.33519	5.24007	4.21312	3.21516	1.77862	2.42739	Novel transcript variants (BRAKER)	3.86826
MSTRG.10390.1	1.09761	2.2003	2.76006	5.67756	6.46013	5.90723	Novel transcript variants (BRAKER)	4.01715
MSTRG.10390.2	0.839351	1.68258	2.11063	4.34167	4.9401	4.51729	Novel transcript variants (BRAKER)	3.07194
MSTRG.10392.1	8.01592	4.82964	9.30068	27.6441	13.5048	35.7036	Novel transcript variants (BRAKER)	16.4998
MSTRG.10393.1	21.0381	41.3571	40.9347	16.503	28.4796	13.8128	Novel transcript variants (BRAKER)	27.0209
MSTRG.10395.2	49.6901	78.6377	62.6365	18.5345	31.718	13.6709	Transcripts from merged genes (BRAKER)	42.4813
MSTRG.10395.3	53.4869	84.7385	67.4626	19.9664	34.1683	14.7036	Transcripts from merged genes (BRAKER)	45.7544
MSTRG.10395.4	233.854	370.089	294.783	87.3059	149.425	64.4409	Transcripts from merged genes (BRAKER)	199.983
MSTRG.10396.1	16.1511	6.96017	8.85945	175.584	154.536	326.376	Novel transcripts (BRAKER)	114.744
MSTRG.10397.1	0.240832	0.147948	0.0624112	56.3313	36.1514	120.255	Novel transcript variants (BRAKER)	35.5315
MSTRG.10398.1	33.8492	32.0385	24.8276	18.7951	25.5056	11.76	Novel transcript variants (BRAKER)	24.4627
MSTRG.10398.2	283.488	295.141	233.631	157.431	216.958	98.8017	Novel transcript variants (BRAKER)	214.242
MSTRG.10398.3	280.031	291.541	230.782	155.511	214.312	97.5968	Novel transcript variants (BRAKER)	211.629
MSTRG.10398.4	294.391	306.492	242.617	163.486	225.302	102.602	Novel transcript variants (BRAKER)	222.482
MSTRG.10399.1	0.0510082	0.0752049	0.0812348	0.0260421	0.0847142	0.0570043	Novel transcripts (BRAKER)	0.0625347
MSTRG.104.1	2.42391	2.39904	1.86049	6.25126	10.3001	6.6885	Novel transcript variants (BRAKER)	4.98722
MSTRG.1040.1	38.0609	35.4895	31.362	18.4263	21.3549	11.4849	Transcripts from merged genes (BRAKER)	26.0297
MSTRG.10400.1	0.25692	0	0	57.2775	31.7174	111.69	Novel transcript variants (BRAKER)	50.2355
MSTRG.10402.1	0	0	0	0.404966	0.285424	0.64267	Novel transcript variants (BRAKER)	0.444354
MSTRG.10403.1	152.556	83.4254	108.087	180.957	95.8951	205.594	Novel transcript variants (BRAKER)	137.752
MSTRG.10404.1	0.491661	0.466	0.61092	1.1475	1.78863	1.2088	Novel transcript variants (BRAKER)	0.952252
MSTRG.10404.2	0.407762	0.38648	0.50667	0.951686	1.48341	1.00253	Novel transcript variants (BRAKER)	0.789755
MSTRG.10405.1	2.98867	1.1968	1.5052	1.2998	0.600529	1.31125	Novel transcripts (BRAKER)	1.48371
MSTRG.10406.2	24.9576	15.4859	13.0181	21.6041	26.8156	16.2492	Novel transcript variants (BRAKER)	19.6884
MSTRG.10407.1	1.10316	0.559097	0.549023	12.4259	22.4053	8.55282	Novel transcript variants (BRAKER)	7.59923
MSTRG.10408.1	0.313922	0.192849	0.173058	2.77805	6.23894	2.3856	Novel transcripts (BRAKER)	2.01374
MSTRG.10409.1	18.2662	20.8948	29.9971	40.7332	11.1582	52.5294	Novel transcript variants (BRAKER)	28.9298
MSTRG.1041.1	8.8217	11.269	11.3167	4.78702	7.1498	2.71542	Novel transcript variants (BRAKER)	7.6766
MSTRG.10410.2	14.5893	12.9641	10.1923	14.8165	17.1049	19.4065	Novel transcript variants (BRAKER)	14.8456
MSTRG.10411.2	35.1467	21.8989	22.0268	38.6828	20.7598	50.5945	Novel transcript variants (BRAKER)	31.5183
MSTRG.10412.1	11.4044	18.2169	18.8341	6.3173	5.85615	6.39051	Novel transcript variants (BRAKER)	11.1699
MSTRG.10413.1	0.754412	2.31725	2.35128	0.641938	0.737013	0.39675	Novel transcripts (BRAKER)	1.19977
MSTRG.10414.2	0.0566517	0.0696045	0.011567	117.638	127.519	126.981	Novel transcript variants (BRAKER)	62.0459
MSTRG.10414.3	0.203395	0.2499	0.0415287	422.698	458.054	456.125	Novel transcript variants (BRAKER)	222.895
MSTRG.10415.1	3.82106	3.04079	3.1801	3.66601	3.27585	5.08118	Novel transcript variants (BRAKER)	3.6775
MSTRG.10416.1	3.31001	3.3917	3.19066	4.81015	5.62378	5.9441	Novel transcript variants (BRAKER)	4.3784
MSTRG.10417.1	9.30083	8.61193	9.97868	5.42359	3.77374	5.78887	Novel transcript variants (BRAKER)	7.14627
MSTRG.10418.1	0.340852	0.538437	0.954435	1.07727	0.700867	1.22438	Novel transcript variants (BRAKER)	0.806041
MSTRG.10419.1	0.219667	0.209916	0.358808	1.10073	0.594524	1.06379	Novel transcripts (BRAKER)	0.591239
MSTRG.1042.1	0.0827371	0	0.101358	69.4867	111.027	94.7745	Novel transcript variants (BRAKER)	55.0944
MSTRG.10420.1	0.0642301	0.157831	0.157372	0.710504	0.640038	0.502463	Novel transcripts (BRAKER)	0.372073
MSTRG.10422.1	11.4965	6.729	6.27185	13.0974	15.4233	13.9975	Novel transcript variants (BRAKER)	11.1693
MSTRG.10423.1	5.25265	7.85055	6.31396	12.673	21.8843	11.1942	Novel transcript variants (BRAKER)	10.8614
MSTRG.10423.2	11.4895	17.1973	13.811	27.7381	47.8805	24.4857	Novel transcript variants (BRAKER)	23.767
MSTRG.10423.4	2.18868	4.16961	3.93152	3.64104	7.14736	3.43533	Novel transcript variants (BRAKER)	4.08559
MSTRG.10424.1	15.4531	9.08312	10.5032	7.77593	5.88319	6.28245	Novel transcript variants (BRAKER)	9.1635
MSTRG.10425.1	44.6424	23.0522	20.9305	67.3876	43.5099	87.925	Transcripts from merged genes (BRAKER)	47.9079
MSTRG.10427.1	15.8428	17.7913	14.989	10.4326	8.64483	9.92387	Novel transcript variants (BRAKER)	12.9374
MSTRG.10428.1	59.6626	48.2231	44.3677	73.0257	81.7675	74.5559	Novel transcript variants (BRAKER)	63.6004
MSTRG.10428.2	18.5236	15.041	13.849	22.7282	25.4397	23.215	Novel transcript variants (BRAKER)	19.7994
MSTRG.1043.2	0.135409	0.0166369	0.21565	0.0460884	0.0224886	0.0453979	Novel transcript variants (BRAKER)	0.0802784
MSTRG.10430.1	0.00848955	0	0.0208005	0.173372	0.108095	0.11385	Novel transcripts (BRAKER)	0.0849215
MSTRG.10431.1	0.00840187	0.0103229	0.0205857	0.107239	0.0790714	0.018779	Novel transcripts (BRAKER)	0.0407333
MSTRG.10432.1	0.0656335	0.22176	0.170861	0.0139621	0.0363345	0.0366744	Novel transcripts (BRAKER)	0.0908708
MSTRG.10433.2	381.314	249.842	183.59	108.709	148.477	79.8034	Novel transcript variants (BRAKER)	191.956
MSTRG.10434.1	36.3838	43.883	37.7008	29.7726	40.9553	26.8361	Novel transcript variants (BRAKER)	35.9219
MSTRG.10435.1	2.32452	2.51328	2.84768	681.367	295.821	1651.87	Novel transcript variants (BRAKER)	439.457
MSTRG.10436.1	0.760752	0.140203	0.396087	0.981787	1.53018	1.28944	Novel transcripts (BRAKER)	0.849741
MSTRG.10437.1	45.0835	44.7778	34.1901	30.4896	40.8753	33.7887	Novel transcript variants (BRAKER)	38.2008
MSTRG.10438.1	178.348	239.576	238.65	176.817	273.31	149.291	Novel transcript variants (BRAKER)	209.332
MSTRG.10439.2	34.4776	26.5907	22.1641	22.7728	21.3923	25.2547	Novel transcript variants (BRAKER)	25.442
MSTRG.1044.1	2.18486	2.2491	0.434042	4310.35	3670.84	5674.42	Novel transcripts (BRAKER)	2276.75
MSTRG.10440.1	106.996	69.5964	115.535	175.215	70.6186	400.979	Novel transcript variants (BRAKER)	156.49
MSTRG.10440.3	1.13559	1.31947	1.08272	0.878839	1.22034	0.907304	Novel transcript variants (BRAKER)	1.09071
MSTRG.10441.2	0.688348	1.16207	0.766023	0.487357	0.471244	0.505013	Novel transcript variants (BRAKER)	0.68001
MSTRG.10442.2	0.104361	0.0769333	0.0639244	0.088802	0.115548	0.0641458	Novel transcript variants (BRAKER)	0.0856191
MSTRG.10443.1	1.79844	0.631325	0.865545	1.3117	1.49342	0.287122	Novel transcripts (BRAKER)	1.06459
MSTRG.10444.1	0	0	0	13.9244	8.39108	26.7978	Novel transcripts (BRAKER)	16.3711
MSTRG.10445.1	0	0	0	0.194147	0.139606	0.509968	Novel transcripts (BRAKER)	0.28124
MSTRG.10446.1	5.36361	6.77506	6.07242	10.1535	19.0001	9.05851	Novel transcript variants (BRAKER)	9.40387
MSTRG.10446.2	3.89935	4.92547	4.41465	7.38162	13.8131	6.58554	Novel transcript variants (BRAKER)	6.83662
MSTRG.10447.1	21.0507	39.8051	50.7336	17.4777	7.59699	20.7707	Transcripts from merged genes (BRAKER)	26.2391
MSTRG.10448.1	68.7476	68.4725	92.4429	533.522	602.031	489.463	Novel transcript variants (BRAKER)	309.113
MSTRG.10449.1	48.9451	91.6432	95.2037	63.358	82.3686	50.3343	Transcripts from merged genes (BRAKER)	71.9755
MSTRG.10449.2	15.2319	28.5197	29.6277	19.7172	25.6334	15.6642	Transcripts from merged genes (BRAKER)	22.399
MSTRG.1045.1	0.0938748	0.115338	0.115003	4.26022	1.33387	5.45531	Novel transcripts (BRAKER)	1.8956
MSTRG.10450.1	0	0	0	0.0912904	0.059393	0.0599485	Novel transcripts (BRAKER)	0.0702106
MSTRG.10451.1	0	0	0	1.17085	0.725472	2.34322	Novel transcript variants (BRAKER)	1.41318
MSTRG.10452.1	0.172796	0.318456	0.423372	0.588137	0.478298	0.482771	Novel transcript variants (BRAKER)	0.410638
MSTRG.10452.3	0.11079	0.0989974	0.0616932	0.034281	0.100364	0.0225116	Novel transcript variants (BRAKER)	0.0714395
MSTRG.10453.1	0	0.0108652	0	1.50497	2.11491	1.47254	Novel transcript variants (BRAKER)	1.27582
MSTRG.10454.1	0.249268	0.15313	0.508947	23.2255	28.4958	21.6355	Novel transcript variants (BRAKER)	12.378
MSTRG.10456.1	0.00793093	0	0.00485795	0.0337426	0.0219527	0.0354529	Transcripts from merged genes (BRAKER)	0.0207874
MSTRG.10456.2	0.016632	0.0204347	0.0101876	0.0849141	0.064452	0.0743484	Transcripts from merged genes (BRAKER)	0.0451615
MSTRG.10457.1	0.777927	5.11348	7.05227	0.463363	0.36606	0.347749	Novel transcript variants (BRAKER)	2.35347
MSTRG.10457.2	3.55859	16.4649	16.8789	2.22882	3.65444	2.43937	Novel transcript variants (BRAKER)	7.53751
MSTRG.10457.3	3.39011	15.4339	15.5339	2.10201	3.57893	2.3789	Novel transcript variants (BRAKER)	7.06962
MSTRG.10458.1	2.15813	4.1194	4.84705	2.84202	3.40642	2.85686	Novel transcript variants (BRAKER)	3.37165
MSTRG.10459.1	0.320098	0.0983212	0.19607	341.149	181.724	701.231	Novel transcripts (BRAKER)	204.12
MSTRG.1046.1	2.10857	0.461353	0.725401	1.9171	0.927445	1.09752	Novel transcripts (BRAKER)	1.20623
MSTRG.1046.2	1.89044	0.413627	0.650359	1.71878	0.831502	0.983982	Novel transcripts (BRAKER)	1.08145
MSTRG.10462.1	0.0319052	0	0	0.244336	0.194289	0.0713112	Novel transcripts (BRAKER)	0.13546
MSTRG.10463.1	176.233	295.704	221.898	219.878	305.249	254.817	Novel transcript variants (BRAKER)	245.63
MSTRG.10464.2	2.53909	6.32713	4.49057	5.26441	4.13771	3.47701	Novel transcript variants (BRAKER)	4.37266
MSTRG.10464.3	2.00128	4.95092	3.49531	4.14221	3.17399	2.78055	Novel transcript variants (BRAKER)	3.42404
MSTRG.10465.1	0.0750998	0	0.0153337	0	0.0138584	0	Novel transcript variants (BRAKER)	0.034764
MSTRG.10466.1	7.57257	3.15258	2.10838	2.34312	1.45513	3.91663	Novel transcripts (BRAKER)	3.42473
MSTRG.10467.1	24.1757	34.4906	28.9158	11.8202	14.7629	9.63178	Transcripts from merged genes (BRAKER)	20.6328
MSTRG.10468.1	1.665	0.46493	1.34437	6.37547	4.06405	5.83591	Novel transcript variants (BRAKER)	3.29162
MSTRG.10469.1	0.360849	0.246308	0.349967	0.486164	0.504962	0.280047	Novel transcript variants (BRAKER)	0.371383
MSTRG.1047.1	0.162398	0.223002	0.152136	0.170701	0.148076	0.224191	Novel transcript variants (BRAKER)	0.180084
MSTRG.10470.2	15.2547	40.4837	41.9232	22.2397	17.5467	28.4131	Novel transcript variants (BRAKER)	27.6435
MSTRG.10471.1	9.36629	11.765	12.0615	5.27887	4.04442	8.2507	Novel transcript variants (BRAKER)	8.46114
MSTRG.10472.1	0.414187	0.181745	0.289946	0.25174	0.245671	0.13225	Novel transcripts (BRAKER)	0.25259
MSTRG.10472.2	0.632786	0.277666	0.470658	0.423064	0.425375	0.202049	Novel transcripts (BRAKER)	0.405266
MSTRG.10473.1	0	0.0759189	0.0756979	67.4059	28.8368	182.373	Novel transcripts (BRAKER)	55.7535
MSTRG.10473.2	0	0.0243804	0.0243095	19.536	8.24995	51.9142	Novel transcripts (BRAKER)	15.9498
MSTRG.10474.1	0	0.12495	0.0872103	0.328836	0.146379	0.250035	Novel transcript variants (BRAKER)	0.187482
MSTRG.10475.1	252.082	258.975	209.237	153.874	190.169	131.54	Novel transcript variants (BRAKER)	199.313
MSTRG.10476.2	148.532	139.642	105.611	84.7462	75.6327	106.43	Novel transcript variants (BRAKER)	110.099
MSTRG.10477.1	73.2772	59.0999	59.9357	54.885	57.5395	58.9664	Transcripts from merged genes (BRAKER)	60.6173
MSTRG.10478.1	0	0	0	2.7016	2.94406	3.01594	Novel transcript variants (BRAKER)	2.8872
MSTRG.10479.1	0.111365	0.0608121	0.0530557	115.935	205.347	129.337	Novel transcript variants (BRAKER)	75.1408
MSTRG.1048.2	2.52368	1.09179	1.16119	8.22677	11.9902	6.89858	Transcripts from merged genes (BRAKER)	5.31537
MSTRG.10480.1	0.257319	0.223166	0.231788	0.914461	1.17313	0.608965	Novel transcript variants (BRAKER)	0.568138
MSTRG.10481.1	421.911	267.123	284.792	197.461	200.434	237.768	Novel transcript variants (BRAKER)	268.248
MSTRG.10482.1	0.094524	0.0331817	0.0165425	29.8401	40.3002	25.4128	Novel transcripts (BRAKER)	15.9496
MSTRG.10483.1	14.7647	18.3769	15.6328	6.08393	7.65009	5.85841	Novel transcript variants (BRAKER)	11.3945
MSTRG.10484.1	31.6406	17.161	16.4563	234.548	266.372	340.618	Novel transcript variants (BRAKER)	151.133
MSTRG.10485.1	61.8223	50.6138	42.2803	56.531	66.1919	62.2038	Novel transcript variants (BRAKER)	56.6072
MSTRG.10486.1	0.0294509	0.0180923	0	21.3136	11.6899	45.2552	Novel transcript variants (BRAKER)	15.6613
MSTRG.10487.1	0	0	0	35.5318	10.6793	51.924	Novel transcripts (BRAKER)	32.7117
MSTRG.10488.1	58.6421	66.447	45.1657	14.1554	10.5251	10.9824	Novel transcript variants (BRAKER)	34.3196
MSTRG.10489.1	45.6522	36.1545	36.0492	21.0611	28.3179	15.6744	Transcripts from merged genes (BRAKER)	30.4849
MSTRG.1049.1	0	0	0	6.57155	2.17804	12.7019	Novel transcripts (BRAKER)	7.1505
MSTRG.10490.1	34.4839	21.6794	17.1174	22.0261	37.6598	17.5171	Transcripts from merged genes (BRAKER)	25.0806
MSTRG.10490.4	39.8448	28.3744	23.0706	21.4222	28.3681	25.3104	Transcripts from merged genes (BRAKER)	27.7318
MSTRG.10491.1	42.5807	28.7957	24.3708	31.9786	31.4355	38.0229	Novel transcripts (BRAKER)	32.864
MSTRG.10492.1	166.406	127.821	123.526	122.495	129.164	136.487	Transcripts from merged genes (BRAKER)	134.316
MSTRG.10493.1	13.4078	19.0324	26.0734	12.8119	8.87582	25.6036	Novel transcripts (BRAKER)	17.6341
MSTRG.10494.1	0.450066	0.744382	0.678596	0.382967	0.613306	0.193451	Novel transcript variants (BRAKER)	0.510461
MSTRG.10495.1	3.14935	3.57921	2.74893	0.0669954	0.0871736	0.175978	Novel transcript variants (BRAKER)	1.63461
MSTRG.10495.2	1.21279	1.37833	1.05859	0.0257995	0.03357	0.0677678	Novel transcript variants (BRAKER)	0.629475
MSTRG.10497.1	0	0	0	0	0.0181368	0	Novel transcript variants (BRAKER)	0.0181368
MSTRG.10498.2	0	0	0.0153731	0.0640676	0.041682	0.0841436	Transcripts from merged genes (BRAKER)	0.0513166
MSTRG.105.1	0.0244686	0.0300631	0	0.229027	0.108366	0.710968	Novel transcripts (BRAKER)	0.220579
MSTRG.1050.1	0	0	0	0	0	0	Novel transcript variants (BRAKER)	#DIV/0!
MSTRG.10501.1	29.2115	18.4824	15.1809	10.2666	16.0611	7.40982	Novel transcript variants (BRAKER)	16.102
MSTRG.10502.1	26.9925	21.6102	25.948	22.084	17.4004	22.9539	Novel transcript variants (BRAKER)	22.8315
MSTRG.10503.1	41.1161	48.5748	44.5719	32.7234	43.4543	38.8002	Novel transcript variants (BRAKER)	41.5401
MSTRG.10503.2	38.4776	45.2652	41.3706	30.3865	40.0107	35.7658	Novel transcript variants (BRAKER)	38.5461
MSTRG.10504.1	29.5958	28.0687	23.6813	20.9585	19.9513	21.0731	Novel transcript variants (BRAKER)	23.8881
MSTRG.10505.2	31.8952	33.8508	22.4255	7.00499	11.0385	6.4724	Transcripts from merged genes (BRAKER)	18.7812
MSTRG.10505.3	41.9204	43.2198	29.0684	12.4183	20.6997	12.1479	Transcripts from merged genes (BRAKER)	26.5791
MSTRG.10506.2	76.2999	69.26	55.4431	43.1644	56.615	50.7461	Novel transcript variants (BRAKER)	58.5881
MSTRG.10507.1	2.83358	0.886188	1.98812	6.31277	8.37097	4.31819	Novel transcript variants (BRAKER)	4.1183
MSTRG.10508.1	0	0	0	0.284202	0.384023	0.229697	Novel transcript variants (BRAKER)	0.299307
MSTRG.10509.1	3.66961	1.19674	2.35875	3.93205	3.09739	3.51874	Novel transcript variants (BRAKER)	2.96221
MSTRG.1051.1	0.0770761	0.0631325	0	0.065585	0.0711153	0.172273	Novel transcript variants (BRAKER)	0.0898364
MSTRG.10510.1	0.315571	0.230211	0.241621	2.7188	1.04274	5.78594	Novel transcript variants (BRAKER)	1.72248
MSTRG.10511.1	45.8609	69.0252	56.3409	13.7813	18.1923	12.478	Novel transcript variants (BRAKER)	35.9464
MSTRG.10512.1	3.53762	2.42775	4.13208	5.47802	5.6106	6.2092	Transcripts from merged genes (BRAKER)	4.56588
MSTRG.10512.2	4.58543	3.18067	5.36441	7.10057	7.28004	8.0637	Transcripts from merged genes (BRAKER)	5.92914
MSTRG.10513.2	0.325926	0.163819	0.190566	70.7959	82.6707	96.2751	Novel transcript variants (BRAKER)	41.737
MSTRG.10513.3	0.31773	0.159699	0.185773	68.9173	80.4878	93.6441	Novel transcript variants (BRAKER)	40.6187
MSTRG.10513.4	0.725627	0.364718	0.424266	144.819	168.461	196.686	Novel transcript variants (BRAKER)	85.2467
MSTRG.10514.1	0.178591	0.0731413	0.127625	2.15284	1.53245	4.92309	Novel transcript variants (BRAKER)	1.49796
MSTRG.10515.1	23.7101	18.9448	14.4915	12.2853	17.0722	10.8529	Novel transcript variants (BRAKER)	16.2261
MSTRG.10516.1	12.8504	45.3151	44.6721	79.7371	67.0745	136.616	Transcripts from merged genes (BRAKER)	64.3775
MSTRG.10517.1	6.16275	14.4671	14.5028	5.15385	6.87026	5.94049	Novel transcript variants (BRAKER)	8.84954
MSTRG.10518.1	27.6661	62.0331	53.1585	47.1704	72.2441	49.947	Novel transcript variants (BRAKER)	52.0365
MSTRG.10518.2	123.358	276.595	237.024	210.325	322.124	222.705	Novel transcript variants (BRAKER)	232.022
MSTRG.1052.2	62.2691	102.14	109.854	82.5053	50.6419	126.683	Novel transcript variants (BRAKER)	89.0155
MSTRG.10520.1	0.920153	1.28383	1.08903	0.769698	0.656169	0.59259	Novel transcripts (BRAKER)	0.885245
MSTRG.10521.1	0.192509	0.101368	0.101073	0.608431	0.517639	1.4445	Novel transcript variants (BRAKER)	0.494254
MSTRG.10522.1	0	0.29988	0	4.46524	2.4997	7.9102	Novel transcript variants (BRAKER)	3.79376
MSTRG.10524.1	11.3177	9.18601	12.0863	18.4826	7.42997	25.7562	Novel transcript variants (BRAKER)	14.0431
MSTRG.10525.1	34.5762	37.0967	30.4404	27.9216	30.0022	25.4754	Novel transcript variants (BRAKER)	30.9188
MSTRG.10526.1	24.0791	64.064	57.2537	38.1099	60.8339	27.2032	Novel transcript variants (BRAKER)	45.2573
MSTRG.10527.1	84.9477	84.117	93.7138	73.6397	52.8526	113.054	Novel transcript variants (BRAKER)	83.7208
MSTRG.10528.1	16.3019	31.5501	28.3569	13.9874	17.5969	17.5585	Novel transcript variants (BRAKER)	20.892
MSTRG.10528.2	29.0479	56.0269	50.4743	24.8197	31.3387	31.34	Novel transcript variants (BRAKER)	37.1746
MSTRG.10529.1	11.6979	18.5842	12.3278	4.46836	8.47665	4.10643	Novel transcript variants (BRAKER)	9.94356
MSTRG.1053.1	16.0611	11.3903	10.5008	8.01892	12.1569	6.57648	Transcripts from merged genes (BRAKER)	10.7841
MSTRG.10530.1	0.498111	0.611999	0.488174	0.169539	0.165452	0.111333	Novel transcript variants (BRAKER)	0.340768
MSTRG.10531.2	2.36882	1.61428	2.71397	3.68856	2.92006	3.54756	Novel transcript variants (BRAKER)	2.80888
MSTRG.10533.2	167.615	252.783	240.401	226.924	213.801	263.003	Novel transcript variants (BRAKER)	227.421
MSTRG.10534.1	0.241061	0	0.0369144	149.021	158.44	224.139	Novel transcripts (BRAKER)	106.376
MSTRG.10535.1	0.0303953	0.00746898	0.00372362	28.3622	53.3375	25.8159	Novel transcripts (BRAKER)	17.9262
MSTRG.10536.1	0.0910726	0.0522178	0.104132	1.54989	1.35455	2.80229	Novel transcript variants (BRAKER)	0.99236
MSTRG.10536.2	0.0915852	0.0525117	0.104718	1.56901	1.37908	2.86583	Novel transcript variants (BRAKER)	1.01045
MSTRG.10537.1	15.5849	23.7349	18.062	3.80389	3.26483	4.35157	Transcripts from merged genes (BRAKER)	11.467
MSTRG.10538.1	0	0.0450523	0.0224606	0.0312016	0.0152247	0.0307341	Novel transcript variants (BRAKER)	0.0289347
MSTRG.1054.1	104.888	93.9962	64.9681	22.1103	37.0648	25.8516	Novel transcript variants (BRAKER)	58.1465
MSTRG.10540.1	315.645	256.328	304.849	275.359	82.776	286.362	Novel transcripts (BRAKER)	253.553
MSTRG.10542.1	2.69324	1.94996	4.09477	2.33263	0.692236	3.11732	Novel transcript variants (BRAKER)	2.48002
MSTRG.10543.2	0.976298	0.932959	1.12958	3.59989	2.34206	3.15196	Novel transcript variants (BRAKER)	2.02212
MSTRG.10543.3	0.78628	0.805046	1.92649	3.28952	3.22835	1.17161	Novel transcript variants (BRAKER)	1.86788
MSTRG.10544.1	30.8543	36.6435	33.1809	26.3945	34.8687	20.4862	Transcripts from merged genes (BRAKER)	30.4047
MSTRG.10547.1	0.939533	0.351323	0.725623	1575.04	801.171	3152.9	Novel transcripts (BRAKER)	921.854
MSTRG.10548.1	0.0971844	0.203983	0.148821	0.289433	0.277972	0.443484	Novel transcripts (BRAKER)	0.24348
MSTRG.10549.2	0.160425	0.0750872	0.032755	0.559029	0.570926	0.367102	Novel transcript variants (BRAKER)	0.294221
MSTRG.10550.1	137.644	91.8223	86.8804	52.3017	54.1618	45.1792	Novel transcript variants (BRAKER)	77.9983
MSTRG.10551.1	1.39804	1.40278	0.913433	3.11281	3.80526	4.01011	Transcripts from merged genes (BRAKER)	2.44041
MSTRG.10552.1	0.00871694	0	0	16.2366	30.9809	13.2194	Transcripts from merged genes (BRAKER)	15.1114
MSTRG.10553.1	157.403	124.521	90.5563	210.85	390.319	188.078	Novel transcript variants (BRAKER)	193.622
MSTRG.10553.2	282.174	223.227	162.485	377.988	699.785	337.165	Novel transcript variants (BRAKER)	347.137
MSTRG.10554.1	68.5261	66.3473	57.8403	47.3231	68.3432	40.8335	Transcripts from merged genes (BRAKER)	58.2022
MSTRG.10554.2	368.807	358.96	304.273	242.279	360.183	208.116	Transcripts from merged genes (BRAKER)	307.103
MSTRG.10555.2	0	0	0	0	0	0	Novel transcript variants (BRAKER)	#DIV/0!
MSTRG.10556.1	0	0	0.00925717	0.0257196	0.033466	0.0168895	Novel transcript variants (BRAKER)	0.0213331
MSTRG.10557.1	78.432	57.2543	42.7152	43.3522	61.7233	37.4078	Novel transcript variants (BRAKER)	53.4808
MSTRG.10558.1	68.0154	100.839	104.134	54.9952	93.2862	38.4781	Novel transcript variants (BRAKER)	76.6247
MSTRG.10559.1	27.533	43.2344	35.5366	15.7184	20.8414	20.4868	Novel transcript variants (BRAKER)	27.2251
MSTRG.1056.1	0.0559483	0.0687403	0.0856752	0.190428	0.0929186	0	Novel transcripts (BRAKER)	0.0987421
MSTRG.10560.1	119.723	83.6043	63.7451	80.7826	106.697	66.8746	Novel transcript variants (BRAKER)	86.9045
MSTRG.10560.3	51.7354	70.2282	64.6314	122.694	63.1018	190.423	Novel transcript variants (BRAKER)	93.8024
MSTRG.10561.1	47.7301	30.8024	48.284	42.8704	19.0168	92.9423	Novel transcript variants (BRAKER)	46.941
MSTRG.10562.1	46.0794	33.9284	26.795	15.9326	22.559	12.5182	Novel transcript variants (BRAKER)	26.3021
MSTRG.10562.3	29.1985	29.1735	27.2982	46.6139	30.4101	72.6028	Novel transcript variants (BRAKER)	39.2162
MSTRG.10562.4	48.022	47.9807	44.8965	76.6645	50.0146	119.408	Novel transcript variants (BRAKER)	64.4977
MSTRG.10563.1	617.742	894.367	727.862	110.748	163.967	88.8138	Novel transcript variants (BRAKER)	433.917
MSTRG.10564.1	0.327617	0.241514	0.0802702	87.0886	130.875	100.832	Novel transcript variants (BRAKER)	53.2408
MSTRG.10565.1	0.294361	0.361664	0.180305	14.9033	16.1328	15.2968	Novel transcripts (BRAKER)	7.86154
MSTRG.10566.1	25.4922	20.9083	14.182	25.5569	26.2356	25.3445	Novel transcript variants (BRAKER)	22.9533
MSTRG.10566.3	13.9231	18.9202	16.6457	21.8106	32.2986	22.5711	Novel transcript variants (BRAKER)	21.0282
MSTRG.10567.1	26.2561	20.3705	19.1081	42.1024	57.5335	46.6768	Novel transcript variants (BRAKER)	35.3412
MSTRG.10567.2	48.144	37.3521	35.0373	77.2005	105.496	85.5882	Novel transcript variants (BRAKER)	64.8029
MSTRG.10568.1	14.5365	19.4516	12.5186	16.227	24.2617	16.8083	Novel transcripts (BRAKER)	17.3006
MSTRG.10569.1	100.845	129.064	110.23	166.268	158.31	202.371	Transcripts from merged genes (BRAKER)	144.515
MSTRG.1057.2	0.168812	0	0.155104	0.359111	0.677542	0.518805	Novel transcript variants (BRAKER)	0.375875
MSTRG.10570.1	105.753	108.82	69.7044	76.229	121.11	78.731	Novel transcript variants (BRAKER)	93.3912
MSTRG.10573.2	0.0261976	0	0.0160469	0.111459	0.0435088	0.0292772	Novel transcript variants (BRAKER)	0.0452979
MSTRG.10574.1	0.0352313	0	0	46.8267	50.2487	70.8447	Novel transcripts (BRAKER)	41.9888
MSTRG.10574.2	0.0476243	0	0	86.2352	92.3424	129.89	Novel transcripts (BRAKER)	77.1287
MSTRG.10575.1	0.0996222	0.1224	0.0610217	160.045	230.475	224.113	Novel transcript variants (BRAKER)	102.486
MSTRG.10575.2	0.0271949	0.0334128	0.0166577	43.6892	62.9151	61.1785	Novel transcript variants (BRAKER)	27.9767
MSTRG.10576.1	0	0	0	0.0225745	0.0587474	0.148242	Novel transcripts (BRAKER)	0.0765214
MSTRG.10576.2	0	0	0	0	0.133341	0.269177	Novel transcripts (BRAKER)	0.201259
MSTRG.10577.1	0	0.1428	0	75.2614	73.1573	116.25	Novel transcript variants (BRAKER)	66.2029
MSTRG.10577.2	0	0.0416499	0	21.9512	21.3376	33.9063	Novel transcript variants (BRAKER)	19.3092
MSTRG.10578.1	3.11283	1.04306	1.25669	4.8761	2.78071	5.06	Novel transcript variants (BRAKER)	3.02157
MSTRG.10578.3	0.56597	0.202817	0.288895	0.601988	0.36554	0.553437	Novel transcript variants (BRAKER)	0.429774
MSTRG.10579.1	0.844873	0.961152	2.22338	140.827	187.417	187.754	Transcripts from merged genes (BRAKER)	86.6712
MSTRG.1058.1	0	0	0	0.675859	0.403067	2.36705	Novel transcripts (BRAKER)	1.14866
MSTRG.10580.1	2.20011	1.47828	2.44259	95.3014	103.471	133.309	Novel transcripts (BRAKER)	56.3671
MSTRG.10581.1	1.11096	3.4331	2.39205	4.18236	5.29294	4.06327	Novel transcript variants (BRAKER)	3.41245
MSTRG.10582.1	5.89743	17.7188	16.1039	6.5363	11.2348	5.81531	Novel transcript variants (BRAKER)	10.5511
MSTRG.10582.2	3.25433	9.77758	8.88644	3.60687	6.22229	3.22429	Novel transcript variants (BRAKER)	5.82863
MSTRG.10583.1	504.555	419.595	319.849	194.823	258.928	226.39	Novel transcript variants (BRAKER)	320.69
MSTRG.10584.1	0.0574293	0	0	0.0488672	0	0.22463	Novel transcript variants (BRAKER)	0.110309
MSTRG.10585.1	0.107285	0	0	395.014	251.886	727.774	Novel transcripts (BRAKER)	343.695
MSTRG.10586.1	17.1427	13.6309	11.1045	12.5171	20.327	7.5309	Novel transcript variants (BRAKER)	13.7089
MSTRG.10586.2	13.6316	10.839	8.8301	9.95335	16.1636	5.98843	Novel transcript variants (BRAKER)	10.901
MSTRG.10587.1	0.213788	0.0875561	0.0873012	121.094	54.0082	273.562	Novel transcripts (BRAKER)	74.8422
MSTRG.10588.1	18.4569	21.1898	15.9017	13.2164	18.8385	10.6401	Novel transcript variants (BRAKER)	16.3739
MSTRG.10589.1	0	0	0.0301266	86.3805	39.5487	170.695	Novel transcripts (BRAKER)	74.1636
MSTRG.1059.1	6.3096	5.71915	3.57398	8.20948	5.98228	8.47442	Novel transcript variants (BRAKER)	6.37815
MSTRG.10590.2	48.101	49.9957	37.5295	16.8201	21.0369	14.1342	Novel transcript variants (BRAKER)	31.2696
MSTRG.10591.1	0.671572	1.22737	1.24436	3.97871	2.99284	8.98742	Novel transcripts (BRAKER)	3.18371
MSTRG.10593.1	118.634	34.9951	52.9982	14.9762	9.74345	4.35424	Novel transcript variants (BRAKER)	39.2835
MSTRG.10594.1	43.4984	116.935	93.219	172.433	163.106	228.799	Novel transcript variants (BRAKER)	136.332
MSTRG.10596.1	81.4738	142.359	109.676	38.6696	33.7455	45.8578	Novel transcript variants (BRAKER)	75.297
MSTRG.10597.1	48.595	37.5325	32.5939	32.9576	32.5116	36.8527	Transcripts from merged genes (BRAKER)	36.8405
MSTRG.10597.3	0.558475	0.304962	0.608149	11.7219	6.45823	18.8278	Transcripts from merged genes (BRAKER)	6.41325
MSTRG.10599.1	75.1749	52.5789	47.6417	27.9683	26.1681	28.2767	Novel transcript variants (BRAKER)	42.9681
MSTRG.106.1	0.0971441	0.119355	0.208263	3.18245	3.01161	3.36547	Transcripts from merged genes (BRAKER)	1.66405
MSTRG.106.2	0.180796	0.222133	0.387601	5.92289	5.60494	6.2635	Transcripts from merged genes (BRAKER)	3.09698
MSTRG.1060.1	0.955074	0.695373	1.14836	2.28755	2.15407	1.02781	Novel transcript variants (BRAKER)	1.37804
MSTRG.1060.2	0.994719	0.724237	1.19603	2.38251	2.24349	1.07048	Novel transcript variants (BRAKER)	1.43524
MSTRG.10600.1	58.7587	55.6998	54.5133	28.076	28.6002	30.8124	Novel transcript variants (BRAKER)	42.7434
MSTRG.10601.1	13.1864	4.05032	3.41722	22.9803	32.3584	15.1615	Novel transcript variants (BRAKER)	15.1923
MSTRG.10601.3	8.06802	2.2491	2.07643	12.7496	17.0776	7.72836	Novel transcript variants (BRAKER)	8.32484
MSTRG.10602.1	8.31231	5.18662	6.16673	6.69038	6.23997	3.55041	Novel transcript variants (BRAKER)	6.02441
MSTRG.10604.2	0.153145	0.28224	0.175886	0.733008	0.582867	1.09106	Novel transcript variants (BRAKER)	0.503035
MSTRG.10605.1	48.3974	119.522	99.7733	8.73139	11.4283	11.648	Transcripts from merged genes (BRAKER)	49.9167
MSTRG.10605.2	6.8045	20.0828	23.4222	4.46839	1.92442	8.59625	Transcripts from merged genes (BRAKER)	10.8831
MSTRG.10605.3	30.8345	76.2121	63.6671	5.56751	7.28716	7.45607	Transcripts from merged genes (BRAKER)	31.8374
MSTRG.10605.4	15.5634	38.58	32.2081	2.81721	3.71623	3.75826	Transcripts from merged genes (BRAKER)	16.1072
MSTRG.10606.1	0	0	0	0	0	0	Novel transcripts (BRAKER)	#DIV/0!
MSTRG.10607.1	1.20003	1.34946	0.822268	32.5201	59.7564	27.663	Novel transcript variants (BRAKER)	20.5519
MSTRG.10607.2	1.36497	1.56335	0.935281	37.1866	68.2255	31.6977	Novel transcript variants (BRAKER)	23.4956
MSTRG.10608.1	21.3237	11.4737	10.2167	11.7919	7.97583	11.7198	Novel transcript variants (BRAKER)	12.4169
MSTRG.10609.1	0	0	0	0	0.0514739	0	Novel transcripts (BRAKER)	0.0514739
MSTRG.1061.1	0.466925	0.260765	0.46801	0.902981	0.563975	0.284625	Novel transcript variants (BRAKER)	0.491214
MSTRG.10610.1	15.8962	24.3867	19.7122	6.25243	8.86892	6.84003	Novel transcript variants (BRAKER)	13.6594
MSTRG.10611.1	403.05	250.976	207.359	86.8355	142.995	84.5034	Novel transcript variants (BRAKER)	195.953
MSTRG.10611.2	186.736	116.615	96.4289	40.3648	66.3661	39.2339	Novel transcript variants (BRAKER)	90.9574
MSTRG.10612.1	3.49788	8.00315	9.07018	2.27528	1.0973	2.9622	Novel transcript variants (BRAKER)	4.48433
MSTRG.10614.2	118.486	106.551	85.5143	47.6262	68.8629	39.0642	Novel transcript variants (BRAKER)	77.6841
MSTRG.10614.3	86.795	78.0525	62.6422	34.8879	50.4445	28.6159	Novel transcript variants (BRAKER)	56.9063
MSTRG.10615.1	693.691	479.31	559.372	786.994	504.914	1041.09	Transcripts from merged genes (BRAKER)	677.562
MSTRG.10615.2	229.522	213.197	274.672	317.25	170.403	507.927	Transcripts from merged genes (BRAKER)	285.495
MSTRG.10615.5	476.579	277.4	299.548	490.989	352.022	570.681	Transcripts from merged genes (BRAKER)	411.203
MSTRG.10616.2	30.7029	62.2095	50.2743	13.8648	15.1706	6.24539	Novel transcript variants (BRAKER)	29.7446
MSTRG.10617.1	0.032872	0.0403878	0	0.307683	0.454946	0.367361	Novel transcript variants (BRAKER)	0.24065
MSTRG.10619.1	0	0	0	0.149414	0.0388832	0.0784937	Novel transcripts (BRAKER)	0.0889304
MSTRG.1062.1	2.24978	2.01848	5.98013	0.106848	0.00579289	0.163718	Novel transcripts (BRAKER)	1.75412
MSTRG.10620.1	0.0357618	0.0439384	0.00730175	31.2518	43.1127	32.1857	Novel transcript variants (BRAKER)	17.7729
MSTRG.10621.1	0.104138	0.383846	0.239205	0.155072	0.172952	0.23276	Novel transcripts (BRAKER)	0.214662
MSTRG.10622.1	0.118819	0.170317	0.230472	0.337015	0.230223	0.663932	Novel transcripts (BRAKER)	0.291796
MSTRG.10625.1	1.57963	2.64164	1.26322	12.7132	12.6921	7.28192	Novel transcript variants (BRAKER)	6.36194
MSTRG.10626.1	1.69321	1.23935	1.43435	8.92052	8.03734	10.4678	Novel transcripts (BRAKER)	5.29876
MSTRG.10627.1	8.82597	2.63671	4.88779	12.4483	18.2557	10.5391	Transcripts from merged genes (BRAKER)	9.59892
MSTRG.10628.1	1.34662	0.275751	0.893583	4.39243	1.11823	1.75573	Novel transcript variants (BRAKER)	1.63039
MSTRG.10629.1	0	0	0.100506	1.53583	1.54422	1.74203	Novel transcript variants (BRAKER)	1.23065
MSTRG.10630.2	4.71864	7.43721	7.38636	4.17737	3.08718	5.27332	Novel transcript variants (BRAKER)	5.34668
MSTRG.10630.3	8.77848	13.104	13.0156	7.4348	5.67727	9.35196	Novel transcript variants (BRAKER)	9.56034
MSTRG.10631.2	156.138	195.567	311.625	128.785	41.3632	207.641	Novel transcript variants (BRAKER)	173.52
MSTRG.10633.1	19.1814	17.5997	11.8196	6.17123	9.11997	5.59284	Novel transcript variants (BRAKER)	11.5808
MSTRG.10633.3	7.0959	14.0395	15.1976	9.63995	14.494	7.98472	Novel transcript variants (BRAKER)	11.4086
MSTRG.10634.1	10.8159	9.20313	4.78819	1.80892	2.68578	1.52674	Novel transcript variants (BRAKER)	5.13811
MSTRG.10635.1	9.37162	13.5236	11.4209	12.5355	15.8777	14.6751	Novel transcript variants (BRAKER)	12.9007
MSTRG.10636.1	372.349	275.889	225.196	125.842	80.3708	116.683	Novel transcript variants (BRAKER)	199.388
MSTRG.10637.1	4.37651	9.30661	15.3628	1.86201	0.776546	3.63687	Novel transcripts (BRAKER)	5.88688
MSTRG.10638.1	17.0138	23.2187	19.0245	18.0966	24.0054	21.0875	Novel transcript variants (BRAKER)	20.4078
MSTRG.10638.2	17.8306	24.3334	19.9378	18.9654	25.1578	22.0999	Novel transcript variants (BRAKER)	21.3875
MSTRG.10639.1	95.5074	93.7015	77.395	47.557	55.6142	46.9631	Novel transcript variants (BRAKER)	69.4564
MSTRG.1064.1	56.8028	85.3923	75.6926	54.3759	80.1644	46.3129	Novel transcript variants (BRAKER)	66.4568
MSTRG.10640.1	32.1155	42.5477	40.3207	13.9441	16.4927	12.054	Novel transcript variants (BRAKER)	26.2458
MSTRG.10641.1	0.353129	0.178652	0.470776	1.16658	2.09291	1.57856	Transcripts from merged genes (BRAKER)	0.973433
MSTRG.10642.1	0	0	0	0.0314675	0	0	Novel transcripts (BRAKER)	0.0314675
MSTRG.10643.1	49.366	54.2685	45.285	24.1518	32.1889	22.8771	Novel transcript variants (BRAKER)	38.0229
MSTRG.10644.1	13.2865	12.3559	11.3308	15.9278	13.4103	10.4184	Novel transcript variants (BRAKER)	12.7883
MSTRG.10645.1	13.5833	16.5846	14.8723	9.89668	9.44659	9.77212	Novel transcripts (BRAKER)	12.3593
MSTRG.10646.1	216.966	209.392	151.768	73.9603	110.404	81.8826	Novel transcripts (BRAKER)	140.729
MSTRG.10647.1	30.1245	54.0684	45.0126	37.371	45.4049	36.7783	Novel transcript variants (BRAKER)	41.4599
MSTRG.10648.1	7.92672	13.999	20.7838	14.2857	5.57524	22.739	Novel transcript variants (BRAKER)	14.2182
MSTRG.10649.1	0.186694	0.0809574	0.208531	0.401822	0.364776	0.355915	Transcripts from merged genes (BRAKER)	0.266449
MSTRG.1065.1	62.6865	32.6369	31.4206	29.1798	38.6215	21.4121	Novel transcript variants (BRAKER)	35.9929
MSTRG.10650.1	19.9846	6.68188	13.2446	3.17801	1.52349	1.75742	Novel transcript variants (BRAKER)	7.72833
MSTRG.10652.1	0	0	0	0.0464102	0.0301942	0.0609532	Novel transcripts (BRAKER)	0.0458525
MSTRG.10653.1	14.8698	5.04775	6.16955	6.0445	6.4417	6.25016	Novel transcript variants (BRAKER)	7.47057
MSTRG.10654.1	0.674954	0.213601	0.369582	1.62726	1.57387	1.34859	Novel transcript variants (BRAKER)	0.967976
MSTRG.10654.2	0.0930546	0.0285826	0.0427492	0.831403	1.08181	0.519966	Novel transcript variants (BRAKER)	0.432928
MSTRG.10655.2	0.843714	2.48049	2.89778	0.461524	0.316946	0.538796	Novel transcript variants (BRAKER)	1.25654
MSTRG.10655.3	1.07623	3.16408	3.69638	0.588715	0.404293	0.687283	Novel transcript variants (BRAKER)	1.60283
MSTRG.10656.1	1.21071	3.41815	3.96046	2.58648	0.812854	1.58334	Novel transcript variants (BRAKER)	2.262
MSTRG.10657.1	0.223093	0.234944	0.409955	0.406784	0.141147	1.0685	Novel transcripts (BRAKER)	0.414071
MSTRG.10658.1	53.0152	55.0244	72.7351	0.096598	0.0942691	0.570905	Novel transcripts (BRAKER)	30.2561
MSTRG.10659.1	2.95459	2.28855	1.21963	1.85824	2.84461	2.08163	Novel transcripts (BRAKER)	2.20788
MSTRG.1066.1	147.294	109.931	108.497	47.8709	47.9211	59.3307	Novel transcript variants (BRAKER)	86.8073
MSTRG.10660.1	20.4135	23.0273	20.5527	7.82683	11.0584	7.16211	Novel transcript variants (BRAKER)	15.0068
MSTRG.10661.2	27.2353	27.4235	21.4322	7.41939	13.5616	5.27974	Novel transcript variants (BRAKER)	17.0586
MSTRG.10663.1	37.2271	29.0351	37.809	77.6007	45.6374	104.926	Transcripts from merged genes (BRAKER)	55.3725
MSTRG.10663.2	29.6505	24.3853	31.0819	57.9469	33.0069	82.7052	Transcripts from merged genes (BRAKER)	43.1294
MSTRG.10663.3	24.0975	13.9944	17.798	36.1967	18.8738	56.1118	Transcripts from merged genes (BRAKER)	27.8453
MSTRG.10664.2	8.44167	27.147	19.6265	0.718312	1.21912	0.861365	Transcripts from merged genes (BRAKER)	9.669
MSTRG.10664.3	19.0745	52.0022	36.7795	1.82475	2.37435	1.70281	Transcripts from merged genes (BRAKER)	18.9597
MSTRG.10665.1	34.1102	28.8032	77.8525	179.892	39.7684	345.368	Novel transcript variants (BRAKER)	117.632
MSTRG.10666.1	18.0282	7.56514	12.3	32.0969	12.5599	28.6404	Novel transcript variants (BRAKER)	18.5318
MSTRG.10667.1	18.0027	10.0385	12.0027	6.00963	6.93803	4.02378	Novel transcript variants (BRAKER)	9.50255
MSTRG.10667.2	13.9471	7.7771	9.29878	4.65581	5.37507	3.11732	Novel transcript variants (BRAKER)	7.36186
MSTRG.10668.1	1.37803	0.746112	0.70102	1.27195	1.77142	1.12238	Novel transcript variants (BRAKER)	1.16515
MSTRG.10669.2	22.2073	36.9992	31.0237	5.01176	4.61815	5.45531	Novel transcript variants (BRAKER)	17.5526
MSTRG.1067.1	0.490602	0.120555	0.150255	0.187856	0.149378	0.0822409	Novel transcripts (BRAKER)	0.196814
MSTRG.10670.1	8.38893	12.5283	11.0743	13.8457	6.40565	19.8816	Novel transcripts (BRAKER)	12.0207
MSTRG.10671.1	1.74706	0.883855	0.755385	7.17062	10.013	7.35031	Novel transcript variants (BRAKER)	4.65338
MSTRG.10671.2	1.2767	0.645894	0.552012	4.98446	7.06777	5.28745	Novel transcript variants (BRAKER)	3.30238
MSTRG.10671.3	0.741492	0.227757	0.227094	2.15573	2.805	1.86447	Novel transcript variants (BRAKER)	1.33692
MSTRG.10671.5	0.750998	0.403684	0.316257	2.87565	4.41735	3.09484	Novel transcript variants (BRAKER)	1.97646
MSTRG.10672.1	70.4289	66.7709	72.6603	49.0763	43.3631	45.03	Transcripts from merged genes (BRAKER)	57.8882
MSTRG.10673.1	6.67343	8.27516	14.8368	54.3663	8.65446	77.0649	Novel transcripts (BRAKER)	28.3118
MSTRG.10675.1	17.8031	19.2276	24.712	1.71035	0.492787	2.79184	Novel transcript variants (BRAKER)	11.1229
MSTRG.10676.1	2.904	6.26944	6.35283	50.3741	46.3003	51.3232	Novel transcript variants (BRAKER)	27.254
MSTRG.10676.2	8.23384	17.776	18.0124	142.828	131.277	145.519	Novel transcript variants (BRAKER)	77.2743
MSTRG.10677.1	0	0.0541951	0	63.0564	55.8709	86.1183	Novel transcripts (BRAKER)	51.275
MSTRG.10678.1	40.8825	34.7204	24.9951	20.1845	25.3771	24.8472	Novel transcript variants (BRAKER)	28.5011
MSTRG.10679.1	4.31945	13.0193	10.3356	3.70771	6.02705	3.34517	Novel transcript variants (BRAKER)	6.7924
MSTRG.10679.2	2.40731	7.29916	5.84216	2.07835	3.36288	1.88792	Novel transcript variants (BRAKER)	3.81296
MSTRG.1068.1	0.274461	0.0963468	0.0360249	44.9569	41.1218	63.2071	Novel transcript variants (BRAKER)	24.9488
MSTRG.10680.1	0.295848	0.0726981	0.0362432	99.3871	120.084	80.1435	Novel transcript variants (BRAKER)	50.0032
MSTRG.10680.3	1.11008	0.314742	0.296391	607.968	616.915	888.627	Novel transcript variants (BRAKER)	352.539
MSTRG.10681.1	0.204818	0.0838824	0.0836382	369.361	168.266	981.956	Novel transcript variants (BRAKER)	253.326
MSTRG.10682.1	33.2573	44.9172	40.2906	33.8573	58.9664	26.8841	Novel transcript variants (BRAKER)	39.6955
MSTRG.10683.1	0	0	0	0	0	0	Novel transcripts (BRAKER)	#DIV/0!
MSTRG.10684.1	60.8176	52.0967	49.9986	12.2005	14.2643	6.56777	Novel transcript variants (BRAKER)	32.6576
MSTRG.10685.1	88.3484	137.541	142.316	79.9078	36.0641	127.796	Novel transcript variants (BRAKER)	101.996
MSTRG.10686.1	0	0	0	0.0340468	0	0.0447157	Novel transcripts (BRAKER)	0.0393813
MSTRG.10687.1	0	0	0	0	0	0.0196943	Novel transcripts (BRAKER)	0.0196943
MSTRG.10688.1	40.4747	57.0525	55.4439	11.9915	14.8495	8.59417	Transcripts from merged genes (BRAKER)	31.401
MSTRG.10689.1	0	0	0.00582859	0.00809691	0	0.0106341	Novel transcript variants (BRAKER)	0.00818654
MSTRG.1069.1	0.0379145	0.0349374	0.0348357	0.0322619	0.0314841	0.0105928	Novel transcript variants (BRAKER)	0.0303377
MSTRG.10690.1	0.68777	0.206103	0.390455	1.3703	0.650057	1.29353	Novel transcript variants (BRAKER)	0.766368
MSTRG.10691.1	0.0147181	0	0	19.1739	9.79376	26.7118	Transcripts from merged genes (BRAKER)	13.9235
MSTRG.10691.2	0.00908184	0	0	11.9163	6.06842	16.5334	Transcripts from merged genes (BRAKER)	8.63181
MSTRG.10691.4	14.6922	13.271	11.814	4.48886	5.64923	3.86807	Transcripts from merged genes (BRAKER)	8.96389
MSTRG.10692.1	1.09491	0.336313	0.335334	7.14284	8.48598	6.52598	Novel transcript variants (BRAKER)	3.98689
MSTRG.10692.2	0.352879	0.10839	0.108075	2.32708	2.73494	2.10325	Novel transcript variants (BRAKER)	1.2891
MSTRG.10693.1	0.289171	0	0.227734	1.86302	2.12684	0.877159	Novel transcript variants (BRAKER)	1.07678
MSTRG.10693.2	0.165876	0	0.145149	1.57277	1.79721	0.794463	Novel transcript variants (BRAKER)	0.895094
MSTRG.10694.1	0.0342561	0.0420884	0	0.0874466	0.170677	0.114849	Novel transcript variants (BRAKER)	0.0898633
MSTRG.10695.2	80.4595	66.2147	58.2462	51.3591	78.8835	43.4377	Transcripts from merged genes (BRAKER)	63.1001
MSTRG.10695.4	22.4147	12.8989	10.8625	14.3275	23.0776	11.8672	Transcripts from merged genes (BRAKER)	15.9081
MSTRG.10695.5	22.4763	12.9344	10.8924	14.3668	23.141	11.8998	Transcripts from merged genes (BRAKER)	15.9518
MSTRG.10696.1	0.464904	0.444266	0.949227	0.57141	0.543336	0.230913	Novel transcripts (BRAKER)	0.534009
MSTRG.10697.1	0.400304	0.409858	0.333743	2.30867	3.23793	1.70245	Novel transcripts (BRAKER)	1.39883
MSTRG.10699.1	0.0542723	0.022227	0.0554058	0.67732	1.31197	0.404347	Novel transcript variants (BRAKER)	0.420923
MSTRG.1070.1	11.6233	23.0867	19.5922	6.81037	11.1448	5.31832	Novel transcript variants (BRAKER)	12.9293
MSTRG.1070.2	29.1485	57.6459	49.1747	16.9735	27.782	13.2654	Novel transcript variants (BRAKER)	32.3317
MSTRG.1070.3	28.7106	56.3397	48.1536	16.7017	27.0803	13.1916	Novel transcript variants (BRAKER)	31.6963
MSTRG.10701.1	0.0360257	0	0	0.0306547	0	0.0402606	Novel transcript variants (BRAKER)	0.035647
MSTRG.10702.1	0.18775	0.461353	0.402509	1.35795	0.597642	0.944188	Novel transcript variants (BRAKER)	0.658565
MSTRG.10703.1	8.94371	11.7995	9.43718	4.12467	5.35437	4.90851	Novel transcripts (BRAKER)	7.42798
MSTRG.10704.1	0	0	0	0	0	0	Novel transcript variants (BRAKER)	#DIV/0!
MSTRG.10705.1	46.1572	76.1028	64.7183	67.7055	94.9737	70.9797	Transcripts from merged genes (BRAKER)	70.1062
MSTRG.10706.1	3842.72	2780.97	1809.36	493.306	158.422	202.476	Novel transcript variants (BRAKER)	1547.88
MSTRG.10707.1	0.936176	0.21909	0.300372	38.768	52.2707	45.7848	Novel transcripts (BRAKER)	23.0465
MSTRG.1071.1	0.563249	0.638797	0.981945	0.221204	0.335799	0.0968398	Novel transcript variants (BRAKER)	0.472972
MSTRG.10710.1	49.0455	48.6419	53.0207	113.426	57.8352	167.353	Novel transcript variants (BRAKER)	81.5538
MSTRG.10711.1	0.224953	0.138193	0.110233	0.267982	0.323788	0.226257	Novel transcripts (BRAKER)	0.215234
MSTRG.10712.2	0.319694	0.211502	0.271139	2.51106	5.50006	2.30854	Novel transcript variants (BRAKER)	1.85367
MSTRG.10713.1	0	0	0	6.36456	5.274	21.2933	Novel transcript variants (BRAKER)	10.9773
MSTRG.10714.1	0.157831	0.138512	0.248597	1.18952	0.312053	1.23469	Novel transcript variants (BRAKER)	0.546867
MSTRG.10715.1	0.107522	0.0264211	0.0922047	1.00641	0.202381	1.29774	Novel transcripts (BRAKER)	0.455446
MSTRG.10715.2	0.278942	0.11424	0.199338	2.49223	0.463265	3.06536	Novel transcripts (BRAKER)	1.10223
MSTRG.10716.1	11.8353	2.43298	2.72209	5.584	7.02364	4.60613	Novel transcript variants (BRAKER)	5.70069
MSTRG.10717.2	0.0916712	0.0563154	0.0842272	0.234012	0.177621	0.256118	Novel transcript variants (BRAKER)	0.149994
MSTRG.10718.1	89.4847	126.429	95.5454	20.3651	23.8736	23.2552	Novel transcript variants (BRAKER)	63.1589
MSTRG.10719.1	14.2027	26.2157	23.5011	0.0563853	0.0733678	0.172793	Novel transcript variants (BRAKER)	10.7037
MSTRG.1072.2	1570.31	1135.35	736.205	1769.88	2444.13	1875.84	Novel transcript variants (BRAKER)	1588.62
MSTRG.10720.1	0	0	0	0.175509	0.0380617	0.0768354	Novel transcript variants (BRAKER)	0.096802
MSTRG.10721.1	152.302	28.6285	38.7513	23.8146	40.2835	23.1305	Novel transcript variants (BRAKER)	51.1518
MSTRG.10722.1	38.0112	50.5381	42.2252	31.4164	36.297	28.2458	Novel transcript variants (BRAKER)	37.7889
MSTRG.10723.2	0.0388963	0	0.0238252	2.5154	1.27044	6.21601	Novel transcript variants (BRAKER)	2.01291
MSTRG.10724.1	0	0	0.0684748	13.0953	5.19847	24.6947	Novel transcript variants (BRAKER)	10.7642
MSTRG.10725.1	0	0	0.0756979	2.52378	1.16305	2.90029	Novel transcript variants (BRAKER)	1.6657
MSTRG.10725.2	0	0	0.0729284	2.43144	1.25232	2.92724	Novel transcript variants (BRAKER)	1.67098
MSTRG.10726.1	3.3731	1.28416	3.07009	56.7775	76.5083	54.6062	Transcripts from merged genes (BRAKER)	32.6032
MSTRG.10727.1	5.69098	1.98915	2.20874	3.0057	1.2086	1.28844	Novel transcript variants (BRAKER)	2.56527
MSTRG.10727.3	7.25766	2.31653	2.54709	3.56033	1.42983	1.5298	Novel transcript variants (BRAKER)	3.10687
MSTRG.10727.4	8.73693	2.78869	3.06625	4.286	1.72126	1.8416	Novel transcript variants (BRAKER)	3.74012
MSTRG.10728.1	13.2769	13.7921	14.6246	27.2012	49.2738	21.6196	Transcripts from merged genes (BRAKER)	23.298
MSTRG.10728.2	12.8375	13.3869	14.2235	25.932	46.8662	20.6156	Transcripts from merged genes (BRAKER)	22.3103
MSTRG.10729.1	115.652	106.11	131.612	226.694	275.482	163.659	Novel transcript variants (BRAKER)	169.868
MSTRG.10729.2	306.378	281.098	348.657	600.54	729.785	433.554	Novel transcript variants (BRAKER)	450.002
MSTRG.10729.3	69.924	64.1904	79.5735	137.11	166.623	98.9819	Novel transcript variants (BRAKER)	102.734
MSTRG.1073.1	76.8182	74.4886	59.5429	67.6389	120.528	69.2353	Novel transcript variants (BRAKER)	78.0421
MSTRG.10731.1	0	0	0	0.967409	0.399613	1.4924	Novel transcripts (BRAKER)	0.953139
MSTRG.10732.1	50.4492	28.6405	16.1753	23.8976	39.7381	21.7732	Novel transcript variants (BRAKER)	30.1123
MSTRG.10733.2	0.123582	0.101225	0.151396	5.25787	4.24171	4.14327	Novel transcript variants (BRAKER)	2.33651
MSTRG.10733.3	0.482122	0.444266	0.442973	17.2302	13.2116	12.6617	Novel transcript variants (BRAKER)	7.41216
MSTRG.10733.4	0.0950168	0.0875561	0.0873012	3.55744	2.76156	2.60156	Novel transcript variants (BRAKER)	1.53174
MSTRG.10734.1	0.0371216	0	0.0227381	0.584363	0.657614	0.684507	Transcripts from merged genes (BRAKER)	0.397269
MSTRG.10734.2	0.109696	0	0.0671925	1.72683	1.94329	2.08405	Transcripts from merged genes (BRAKER)	1.18621
MSTRG.10734.3	0.131047	0	0.0802702	2.06292	2.32151	2.48967	Transcripts from merged genes (BRAKER)	1.41708
MSTRG.10734.4	0.130173	0	0.0797351	2.04917	2.30603	2.47307	Transcripts from merged genes (BRAKER)	1.40764
MSTRG.10736.1	54.6602	85.7999	78.3511	112.547	171.816	77.9032	Novel transcript variants (BRAKER)	96.8463
MSTRG.10737.1	0	0	0	0.119245	0	0	Novel transcripts (BRAKER)	0.119245
MSTRG.10738.1	1.30551	0.906613	0.695364	75.8294	127.483	67.9376	Transcripts from merged genes (BRAKER)	45.693
MSTRG.10739.2	0.535625	1.22644	1.40183	0.0414336	0.107826	0.136043	Novel transcript variants (BRAKER)	0.574865
MSTRG.1074.1	407.349	221.105	204.886	178.734	146.009	191.832	Novel transcript variants (BRAKER)	224.986
MSTRG.1074.2	520.134	282.287	261.531	228.019	186.439	244.917	Novel transcript variants (BRAKER)	287.221
MSTRG.10740.1	201.807	353.52	309.529	116.427	112.057	124.129	Novel transcript variants (BRAKER)	202.911
MSTRG.10741.1	65.534	38.0097	37.2824	38.7853	31.3645	53.1552	Novel transcript variants (BRAKER)	44.0219
MSTRG.10742.1	308.763	290.473	411.554	567.475	244.342	1028.19	Transcripts from merged genes (BRAKER)	475.133
MSTRG.10744.1	162.99	146.467	207.038	258.405	97.0582	432.979	Novel transcript variants (BRAKER)	217.49
MSTRG.10745.1	37.3997	87.1035	66.2875	19.3627	20.3718	22.2828	Novel transcript variants (BRAKER)	42.1347
MSTRG.10746.1	149.356	157.621	162.093	140.133	65.0468	137.723	Novel transcript variants (BRAKER)	135.329
MSTRG.10747.2	17.5582	18.7832	18.2185	17.9672	15.3344	12.7713	Novel transcript variants (BRAKER)	16.7722
MSTRG.10748.2	23.5912	29.339	23.2931	22.0896	34.5728	21.857	Novel transcript variants (BRAKER)	25.7905
MSTRG.10749.1	44.202	42.0025	37.2162	45.2473	41.8038	57.8016	Transcripts from merged genes (BRAKER)	44.7122
MSTRG.1075.1	60.7444	95.9615	79.0016	46.9043	63.2479	44.6232	Novel transcript variants (BRAKER)	65.0805
MSTRG.1075.2	64.4881	101.876	83.8705	49.795	67.1459	47.3734	Novel transcript variants (BRAKER)	69.0914
MSTRG.10750.2	51.0748	57.2548	56.0914	48.4985	80.2207	40.5107	Novel transcript variants (BRAKER)	55.6085
MSTRG.10751.1	16.7129	12.4018	9.49388	19.0555	15.7257	14.3009	Transcripts from merged genes (BRAKER)	14.6151
MSTRG.10753.1	7.97625	5.57511	4.05972	5.46179	8.08848	4.22711	Novel transcript variants (BRAKER)	5.89808
MSTRG.10754.1	18.9931	22.3536	16.6957	4.38618	5.7785	3.55024	Transcripts from merged genes (BRAKER)	11.9596
MSTRG.10754.2	138.961	163.549	122.122	32.0911	42.2779	25.975	Transcripts from merged genes (BRAKER)	87.496
MSTRG.10755.1	17.2561	21.1425	19.442	10.5797	7.1758	15.2558	Novel transcript variants (BRAKER)	15.142
MSTRG.10756.1	0.198233	0.152223	0.182136	0.0421697	0.123459	0	Transcripts from merged genes (BRAKER)	0.139644
MSTRG.10757.1	0.0122959	0	0.00753165	47.1556	36.894	71.3038	Novel transcript variants (BRAKER)	31.0746
MSTRG.10758.1	0.461243	0.708377	0.729859	0.784954	0.957537	0.773194	Novel transcript variants (BRAKER)	0.73586
MSTRG.10759.1	0	0	0	14.3897	7.38329	17.5349	Novel transcripts (BRAKER)	13.1026
MSTRG.1076.1	49.8997	75.797	62.0917	32.665	45.7886	33.6304	Transcripts from merged genes (BRAKER)	49.9787
MSTRG.1076.2	53.5257	81.3491	66.6931	35.3095	49.0511	36.3942	Transcripts from merged genes (BRAKER)	53.7204
MSTRG.10760.1	1.66332	1.15509	1.15173	2.70761	2.76243	2.82868	Novel transcript variants (BRAKER)	2.04481
MSTRG.10761.1	0.997028	0.715587	0.858624	5.66148	1.06019	3.04482	Novel transcript variants (BRAKER)	2.05629
MSTRG.10761.3	0.557884	0.685439	0.170861	10.681	7.1034	14.9631	Novel transcript variants (BRAKER)	5.69362
MSTRG.10762.1	3.52552	4.47439	3.58333	4.00537	5.37259	4.15643	Novel transcripts (BRAKER)	4.18627
MSTRG.10764.2	544.206	373.497	554.941	683.3	283.361	1266.88	Transcripts from merged genes (BRAKER)	617.697
MSTRG.10766.1	47.1543	71.3027	65.4658	55.058	114.816	43.8985	Novel transcript variants (BRAKER)	66.2825
MSTRG.10767.1	139.31	208.685	136.7	52.8267	89.1093	38.7467	Novel transcript variants (BRAKER)	110.896
MSTRG.10768.1	36.6674	65.6695	61.7028	83.2657	80.6729	120.067	Novel transcript variants (BRAKER)	74.6742
MSTRG.10769.1	7.14476	4.4173	4.4325	5.57293	7.28946	4.37619	Novel transcript variants (BRAKER)	5.53886
MSTRG.1077.1	1.24634	2.14382	2.12486	3.72951	4.09382	3.20354	Novel transcript variants (BRAKER)	2.75698
MSTRG.10770.1	0.189368	0.0517034	0.0644411	0.931005	1.21141	0.540828	Novel transcript variants (BRAKER)	0.498126
MSTRG.10771.1	0	0	0	0.10538	0.0342797	0.184535	Novel transcripts (BRAKER)	0.108065
MSTRG.10772.2	0	0.12495	0.311465	2.81241	4.58842	2.89813	Novel transcript variants (BRAKER)	2.14708
MSTRG.10773.1	18.3611	7.42883	11.5525	59.5208	27.3002	81.2717	Novel transcript variants (BRAKER)	34.2392
MSTRG.10775.1	0.254105	0.328635	0.270335	4.38132	2.7394	14.5276	Novel transcript variants (BRAKER)	3.75023
MSTRG.10776.1	14.9316	11.9952	14.7744	15.5153	13.3529	9.30612	Novel transcript variants (BRAKER)	13.3126
MSTRG.10776.2	12.0073	9.51342	11.6853	12.1269	10.4989	7.52457	Novel transcript variants (BRAKER)	10.5594
MSTRG.10777.1	3.77471	1.37415	4.02481	0.118961	0.193488	0.312476	Novel transcript variants (BRAKER)	1.6331
MSTRG.10778.1	0	0	0	0	0.0482568	0	Novel transcript variants (BRAKER)	0.0482568
MSTRG.1078.1	1.04118	0.778667	0.757915	0.744715	0.91054	0.455312	Transcripts from merged genes (BRAKER)	0.781389
MSTRG.1078.2	0.786591	0.72009	0.623521	0.629947	0.828218	0.361964	Transcripts from merged genes (BRAKER)	0.658388
MSTRG.10780.1	25.5882	12.5798	23.5859	39.2279	10.3705	45.7892	Novel transcript variants (BRAKER)	26.1902
MSTRG.10781.1	0	0.1428	0.17798	0.049449	0.0643424	0	Transcripts from merged genes (BRAKER)	0.108643
MSTRG.10782.1	0.0539391	0	0	0.0458974	0.0298606	0	Novel transcript variants (BRAKER)	0.0432324
MSTRG.10783.1	0.113377	0.046433	0	0.0321578	0.062765	0	Novel transcript variants (BRAKER)	0.0636831
MSTRG.10784.1	0.0938748	0.0288346	0	0	0.0389767	0.0524549	Novel transcript variants (BRAKER)	0.0535352
MSTRG.10785.1	1.33292	2.12588	2.39082	3.26134	1.66793	4.9466	Novel transcripts (BRAKER)	2.62091
MSTRG.10785.2	1.32405	2.1056	2.37491	3.23114	1.6596	4.91369	Novel transcripts (BRAKER)	2.6015
MSTRG.10786.1	16.2242	40.3139	38.6773	53.716	65.9766	69.7362	Novel transcript variants (BRAKER)	47.4407
MSTRG.10787.1	51.6864	83.049	76.1587	28.5385	23.1133	29.1378	Novel transcript variants (BRAKER)	48.6139
MSTRG.10788.1	2.66058	1.77296	1.72637	150.531	170.668	201.103	Novel transcript variants (BRAKER)	88.0771
MSTRG.10788.2	6.78997	4.5247	4.40579	384.215	435.683	513.549	Novel transcript variants (BRAKER)	224.861
MSTRG.10789.1	0.00910726	0	0.011157	0.681953	1.24027	0.977071	Novel transcript variants (BRAKER)	0.583912
MSTRG.1079.1	3.38294	2.28217	1.7039	5.18451	8.26114	6.77903	Novel transcript variants (BRAKER)	4.59895
MSTRG.1079.2	2.592	1.74859	1.30552	3.97236	6.34108	5.19407	Novel transcript variants (BRAKER)	3.5256
MSTRG.10790.1	0	0	0	0.0214662	0.0139658	0.0845785	Novel transcript variants (BRAKER)	0.0400035
MSTRG.10791.1	9.89527	13.8156	13.4675	7.42941	10.3262	6.88936	Novel transcript variants (BRAKER)	10.3039
MSTRG.10792.1	0.476243	0.731413	1.09393	1.0131	0.790941	0.532225	Novel transcript variants (BRAKER)	0.772975
MSTRG.10794.1	780.55	767.842	520.197	731.054	1258.23	403.557	Novel transcript variants (BRAKER)	743.571
MSTRG.10795.1	36.0894	68.7172	68.5859	30.8807	33.3604	23.2007	Novel transcript variants (BRAKER)	43.4724
MSTRG.10796.1	14.474	18.4307	16.8773	10.8128	13.0057	10.4603	Novel transcript variants (BRAKER)	14.0101
MSTRG.10797.1	0	0.0291854	0.0291004	1.15213	1.10462	0.849489	Novel transcript variants (BRAKER)	0.632905
MSTRG.10798.2	0.750998	1.40603	0.788589	0.334732	0.554335	0.119897	Novel transcript variants (BRAKER)	0.659096
MSTRG.10799.1	2.70701	2.07189	1.95713	2.26566	2.13734	2.03334	Novel transcript variants (BRAKER)	2.1954
MSTRG.108.1	0	0	0	0	0	0.0149666	Novel transcripts (BRAKER)	0.0149666
MSTRG.1080.1	15.4111	18.2423	16.2467	7.906	7.21119	9.82688	Novel transcript variants (BRAKER)	12.474
MSTRG.10801.1	0.144995	0.0593821	0	298.101	253.007	432.698	Novel transcript variants (BRAKER)	196.802
MSTRG.10802.1	0.247164	0	0	0.315472	0.136829	0.552437	Novel transcripts (BRAKER)	0.312975
MSTRG.10803.1	1.54968	1.0064	1.17975	1.56353	1.77708	1.73184	Novel transcripts (BRAKER)	1.46805
MSTRG.10804.1	57.2019	44.7605	36.5631	25.9445	40.2274	20.6496	Novel transcript variants (BRAKER)	37.5578
MSTRG.10805.1	30.2294	21.6243	22.2472	29.3809	36.1351	23.8983	Transcripts from merged genes (BRAKER)	27.2525
MSTRG.10805.2	29.7517	21.2826	21.8957	28.9166	35.5641	23.5206	Transcripts from merged genes (BRAKER)	26.8219
MSTRG.10806.1	1.09287	0.358065	0.312395	0.185987	0.221837	0.488535	Novel transcripts (BRAKER)	0.443282
MSTRG.10807.1	5.87482	6.27655	5.00662	5.38534	6.78738	5.45531	Novel transcript variants (BRAKER)	5.79767
MSTRG.10807.3	0.272058	0.525267	0.442796	0.291025	0.447528	0.304038	Novel transcript variants (BRAKER)	0.380452
MSTRG.10808.1	0.0473165	0.0193783	0.0193219	1.92587	2.20032	2.40598	Novel transcript variants (BRAKER)	1.10303
MSTRG.10808.2	0.251407	0.102963	0.102663	10.2328	11.691	12.7837	Novel transcript variants (BRAKER)	5.86074
MSTRG.10809.1	0.764059	3.1031	2.53506	1.24611	2.33815	1.44684	Novel transcripts (BRAKER)	1.90555
MSTRG.1081.1	74.4453	54.7617	56.6768	49.3465	25.2531	69.6691	Novel transcript variants (BRAKER)	55.0254
MSTRG.10810.1	0.104978	0.12898	0.0643025	0.535963	0.639273	0.117319	Novel transcript variants (BRAKER)	0.265136
MSTRG.10811.1	2.51048	6.28319	5.18278	13.8457	2.52222	11.7419	Novel transcript variants (BRAKER)	7.01438
MSTRG.10812.1	1.28201	0.36349	0.966486	9.06265	6.00529	10.6902	Transcripts from merged genes (BRAKER)	4.72836
MSTRG.10813.2	3.09868	2.92057	2.47005	6.664	3.04312	6.40406	Novel transcript variants (BRAKER)	4.10008
MSTRG.10814.1	171.308	147.429	124.02	91.7805	75.782	120.861	Transcripts from merged genes (BRAKER)	121.863
MSTRG.10815.1	0.152812	0.052153	0.114403	0.180596	0.117495	0.370012	Novel transcripts (BRAKER)	0.164578
MSTRG.10816.1	0.523017	0.518589	0.809341	5.72307	3.67768	6.87041	Novel transcript variants (BRAKER)	3.02035
MSTRG.10817.1	15.3647	10.2254	9.59653	12.272	7.24573	21.702	Novel transcripts (BRAKER)	12.7344
MSTRG.10818.1	328.644	70.1149	110.886	160.896	60.5136	134.413	Novel transcripts (BRAKER)	144.245
MSTRG.10819.1	16.4248	12.1363	32.5038	708.673	125.645	581.6	Novel transcripts (BRAKER)	246.164
MSTRG.10819.2	3.68366	2.72186	7.28976	158.937	28.1789	130.438	Novel transcripts (BRAKER)	55.2082
MSTRG.1082.1	98.9966	143.023	125.603	5.73213	7.83691	5.41894	Novel transcript variants (BRAKER)	64.435
MSTRG.1082.2	68.7476	99.3212	87.2241	3.98064	5.4423	3.76315	Novel transcript variants (BRAKER)	44.7465
MSTRG.10820.2	0.0471641	0.0579477	0.0288895	65.1752	32.3502	134.512	Novel transcript variants (BRAKER)	38.6952
MSTRG.10821.1	13.5486	3.0192	2.96973	6.15993	3.16197	8.01597	Novel transcripts (BRAKER)	6.1459
MSTRG.10822.1	3.90519	1.52666	1.35912	6.19281	2.35844	7.73662	Novel transcripts (BRAKER)	3.84647
MSTRG.10823.1	2.37101	0.685439	2.90464	9.4942	1.54422	6.54637	Novel transcript variants (BRAKER)	3.92431
MSTRG.10824.1	126.839	109.431	82.6295	63.9108	85.0649	59.7146	Novel transcript variants (BRAKER)	87.9316
MSTRG.10826.1	0	0.0140954	0.00702718	0.00976196	0.00635107	0	Novel transcript variants (BRAKER)	0.0093089
MSTRG.10826.2	0.126493	0.0847716	0.0845248	0.176129	0.0954905	0.128511	Novel transcript variants (BRAKER)	0.115987
MSTRG.10827.1	0.0610186	0.22491	0.168191	0.129804	0.0506697	0.0340957	Novel transcript variants (BRAKER)	0.111448
MSTRG.10828.1	8.28718	9.65891	11.2823	14.4897	7.58866	34.1274	Novel transcripts (BRAKER)	14.239
MSTRG.10829.1	0.190076	0.0636912	0.0952587	6.99883	8.72415	6.39189	Novel transcripts (BRAKER)	3.74398
MSTRG.1083.1	0	0	0	0.131632	0.0856389	0.192088	Novel transcripts (BRAKER)	0.136453
MSTRG.10830.1	0.02319	0.0569842	0	17.641	14.571	31.1251	Novel transcripts (BRAKER)	12.6834
MSTRG.10831.1	107.32	165.534	129.53	0.0623057	0.108095	0.79102	Novel transcripts (BRAKER)	67.224
MSTRG.10833.1	12.0484	8.50567	9.20125	16.2939	14.1384	19.4903	Novel transcript variants (BRAKER)	13.2797
MSTRG.10834.1	19.8218	61.2481	54.9991	26.181	30.5997	24.2183	Novel transcript variants (BRAKER)	36.178
MSTRG.10835.1	0.125166	0.153784	0.306673	0.985176	0.190553	1.60862	Novel transcripts (BRAKER)	0.561662
MSTRG.10835.2	0.106408	0.130738	0.260714	0.837534	0.161996	1.36754	Novel transcripts (BRAKER)	0.477489
MSTRG.10836.1	0	0	0.00998352	0.221901	0.568448	0.327865	Novel transcript variants (BRAKER)	0.282049
MSTRG.10836.2	0	0	0.0122043	0.457756	0.84932	0.734797	Novel transcript variants (BRAKER)	0.513519
MSTRG.10837.1	0	0	0	0.49449	0.514739	0.727375	Novel transcript variants (BRAKER)	0.578868
MSTRG.10837.3	0	0	0	0.052248	0.0679844	0.343101	Novel transcript variants (BRAKER)	0.154445
MSTRG.10838.1	0.251948	0.309553	0.694467	6.37796	6.69493	6.05363	Novel transcript variants (BRAKER)	3.39708
MSTRG.10838.3	0.0884862	0.108718	0.243903	2.14588	2.32682	2.07664	Novel transcript variants (BRAKER)	1.16508
MSTRG.10839.2	35.1082	55.5737	55.5151	45.1793	29.5265	71.1072	Transcripts from merged genes (BRAKER)	48.6683
MSTRG.1084.1	58.0707	55.7698	82.8675	16.9385	4.42208	20.2626	Novel transcript variants (BRAKER)	39.7219
MSTRG.10840.1	4.78939	3.4703	4.66375	1.98542	1.40501	2.88205	Novel transcript variants (BRAKER)	3.19932
MSTRG.10841.1	0.577122	0.649985	0.47134	9.94436	14.3506	9.02948	Novel transcript variants (BRAKER)	5.83714
MSTRG.10842.1	2.02938	0.471721	1.44464	2.10019	0.242911	0.551661	Novel transcript variants (BRAKER)	1.14008
MSTRG.10843.1	0.106959	0.219023	0.120112	0.803945	0.375011	0.219142	Novel transcript variants (BRAKER)	0.307365
MSTRG.10843.3	0.0922486	0.1889	0.103593	0.693376	0.323435	0.189003	Novel transcript variants (BRAKER)	0.265093
MSTRG.10844.2	68.9313	55.4421	84.0577	114.833	50.7557	240.151	Novel transcript variants (BRAKER)	102.362
MSTRG.10845.1	0	0.0302909	0	0.0629351	0.0545936	0.165312	Novel transcripts (BRAKER)	0.078283
MSTRG.10846.1	0	0	0	0.0180596	0.023499	0	Transcripts from merged genes (BRAKER)	0.0207793
MSTRG.10847.1	1.83544	1.03159	1.24387	0.897202	1.15662	1.06924	Transcripts from merged genes (BRAKER)	1.20566
MSTRG.10847.2	3.55357	1.97622	2.33706	1.68695	2.13291	2.04835	Transcripts from merged genes (BRAKER)	2.28918
MSTRG.10847.5	0.588256	0.304317	0.436183	0.272231	0.422783	0.380603	Transcripts from merged genes (BRAKER)	0.400729
MSTRG.10848.1	0.0490602	0.0120555	0.0300509	0.0166984	0.0108638	0.0219309	Novel transcripts (BRAKER)	0.0234433
MSTRG.10849.1	0.0524187	0	0.00802702	0.0111509	0.0217641	0.0146451	Novel transcripts (BRAKER)	0.0216012
MSTRG.1085.1	0	0	0	31.125	15.3891	54.1321	Novel transcripts (BRAKER)	33.5487
MSTRG.1085.2	0	0	0	16.3185	8.03678	28.2498	Novel transcripts (BRAKER)	17.535
MSTRG.10850.1	0.669059	0.367751	0.312757	5.31106	6.45745	7.17209	Novel transcript variants (BRAKER)	3.38169
MSTRG.10851.1	0.74278	0.831349	1.37428	1.25542	0.506961	2.62105	Novel transcript variants (BRAKER)	1.22197
MSTRG.10852.2	0.46014	0.952486	0.75058	0.412818	0.747585	0.402441	Novel transcript variants (BRAKER)	0.621008
MSTRG.10853.1	19.2301	39.4387	28.658	33.2657	49.9531	28.7407	Novel transcript variants (BRAKER)	33.2144
MSTRG.10854.1	51.7586	49.3858	39.5519	44.7988	61.3517	44.9442	Novel transcript variants (BRAKER)	48.6318
MSTRG.10855.1	245.091	87.4649	98.0492	63.5749	70.8625	52.5831	Novel transcript variants (BRAKER)	102.938
MSTRG.10856.1	0.0694168	0.0548282	0.0516314	0.198298	0.241554	0.144071	Novel transcript variants (BRAKER)	0.126633
MSTRG.10858.2	10.4302	13.0198	11.8377	7.95734	10.3109	8.49985	Novel transcript variants (BRAKER)	10.3426
MSTRG.10859.2	0.0561091	0.206813	0	87.3712	144.873	88.0374	Novel transcript variants (BRAKER)	64.1088
MSTRG.1086.1	3.32469	1.1671	0.678826	3.50259	2.84846	2.83086	Novel transcripts (BRAKER)	2.39209
MSTRG.10860.1	1.90076	3.14918	5.25687	157.547	87.3053	333.981	Novel transcript variants (BRAKER)	98.19
MSTRG.10861.1	0	0	0	53.9983	31.4488	89.8053	Novel transcript variants (BRAKER)	58.4174
MSTRG.10862.1	215.606	184.899	112.671	395.114	777.831	362.41	Novel transcript variants (BRAKER)	341.422
MSTRG.10863.1	17.2916	25.0049	27.699	52.655	25.276	94.8301	Novel transcripts (BRAKER)	40.4595
MSTRG.10865.1	25.5528	54.1458	54.1219	8.74833	9.26962	6.61342	Novel transcript variants (BRAKER)	26.4086
MSTRG.10867.1	0	0	0	2.68856	2.79636	3.78658	Novel transcript variants (BRAKER)	3.0905
MSTRG.10867.3	0	0	0	3.26343	3.777	5.16581	Novel transcript variants (BRAKER)	4.06875
MSTRG.10868.1	33.9167	47.7064	37.1987	30.9154	53.3397	24.1576	Novel transcript variants (BRAKER)	37.8724
MSTRG.10869.1	61.5118	69.05	63.4885	2.5611	2.50635	2.26127	Novel transcript variants (BRAKER)	33.5632
MSTRG.1087.1	97.7297	125.438	131.44	77.3753	116.119	48.8185	Novel transcript variants (BRAKER)	99.4868
MSTRG.10870.1	0	0	0.221486	0.512804	0.0667255	0.269398	Novel transcript variants (BRAKER)	0.267604
MSTRG.10871.1	0.494328	0.151838	0.227094	613.698	586.383	933.203	Novel transcript variants (BRAKER)	355.693
MSTRG.10872.1	315.245	419.31	348.408	333.381	430.501	506.158	Novel transcript variants (BRAKER)	392.167
MSTRG.10873.1	18.0595	17.3264	33.7398	44.6482	15.5582	81.3582	Novel transcript variants (BRAKER)	35.115
MSTRG.10874.1	0.0316569	0.0544528	0.069807	2.03106	2.44301	2.46939	Novel transcripts (BRAKER)	1.18323
MSTRG.10875.1	0.122307	0.0353579	0.110172	0.0734629	0.0995719	0.0402013	Novel transcript variants (BRAKER)	0.0801788
MSTRG.10876.1	37.8144	34.2961	41.524	79.6811	41.2208	108.261	Novel transcript variants (BRAKER)	57.1329
MSTRG.10877.1	264.403	274.575	242.892	334.459	395.732	340.172	Novel transcript variants (BRAKER)	308.706
MSTRG.10878.1	7.04941	4.36142	3.44978	3.68231	4.91637	3.65868	Novel transcripts (BRAKER)	4.51966
MSTRG.10879.1	1.08291	2.58366	2.11336	1.56434	1.6521	1.40722	Novel transcript variants (BRAKER)	1.73393
MSTRG.1088.1	9.42019	19.0145	15.1642	10.3708	14.2604	9.71882	Novel transcript variants (BRAKER)	12.9915
MSTRG.10881.2	3.31289	2.42833	2.27137	4.56481	5.74169	3.68128	Novel transcript variants (BRAKER)	3.66673
MSTRG.10882.1	0	0	0	0.867259	0.494942	2.19811	Novel transcripts (BRAKER)	1.18677
MSTRG.10883.1	32.0679	13.6315	16.5722	29.0894	20.0574	29.5677	Novel transcript variants (BRAKER)	23.4977
MSTRG.10884.1	0.0495373	0.0152159	0.037929	1.10649	0.733585	1.17641	Novel transcripts (BRAKER)	0.519861
MSTRG.10885.1	16.9713	26.4478	23.775	10.9867	14.7562	9.49423	Transcripts from merged genes (BRAKER)	17.0719
MSTRG.10886.1	0.0685924	0.337101	0.39214	0.136187	0.227835	0.459933	Novel transcripts (BRAKER)	0.270298
MSTRG.10887.1	0.0787337	0.62878	0.675176	0.234484	0.305108	0.307961	Novel transcripts (BRAKER)	0.371707
MSTRG.10888.1	2.26723	3.75205	4.3363	5.66953	6.30129	4.60211	Novel transcript variants (BRAKER)	4.48808
MSTRG.1089.1	37.0879	31.789	27.0762	37.0807	59.5469	28.9147	Novel transcripts (BRAKER)	36.9159
MSTRG.10890.1	40.4896	52.2119	45.6702	69.532	62.7286	94.4964	Novel transcript variants (BRAKER)	60.8548
MSTRG.10890.2	61.578	79.4681	69.4879	105.747	95.5123	143.77	Novel transcript variants (BRAKER)	92.5938
MSTRG.10892.1	84.2406	56.0561	74.474	147.131	61.5081	259.303	Novel transcript variants (BRAKER)	113.785
MSTRG.10894.1	0	0.022505	0.0336593	87.906	40.8754	169.207	Novel transcript variants (BRAKER)	59.6089
MSTRG.10894.2	0	0.0372521	0.0557155	145.509	67.677	280.084	Novel transcript variants (BRAKER)	98.6727
MSTRG.10895.1	22.8294	31.7818	21.2828	5.47136	10.6626	4.77958	Novel transcript variants (BRAKER)	16.1346
MSTRG.10896.1	133.503	189.598	183.02	96.8556	91.5458	128.898	Novel transcript variants (BRAKER)	137.237
MSTRG.10897.1	18.3056	16.4934	16.2118	7.46371	3.5891	9.03536	Novel transcripts (BRAKER)	11.8498
MSTRG.10898.1	17.7351	23.3516	19.6743	8.84815	4.76515	12.5246	Novel transcripts (BRAKER)	14.4831
MSTRG.10899.1	0	0	0	0.0133346	0.0347015	0	Novel transcript variants (BRAKER)	0.024018
MSTRG.10899.3	0.0958721	0.117792	0.0978745	29.4635	28.5541	54.4281	Novel transcript variants (BRAKER)	18.7929
MSTRG.109.1	3.46578	2.14811	1.5827	2.00116	3.05785	1.7291	Novel transcript variants (BRAKER)	2.33078
MSTRG.10900.1	0.130671	0.0229353	0.137211	0.540062	0.175681	1.20997	Novel transcripts (BRAKER)	0.369422
MSTRG.10901.1	3.77206	2.18094	1.6989	9.34586	9.08983	14.0102	Novel transcript variants (BRAKER)	6.68297
MSTRG.10902.1	0.172796	0	0.158765	0.367585	0.382638	0.579325	Novel transcripts (BRAKER)	0.332222
MSTRG.10903.2	67.8971	122.814	104.177	71.9348	104.472	58.0247	Novel transcript variants (BRAKER)	88.2198
MSTRG.10904.1	25.0785	10.3462	14.7166	20.8246	21.7647	12.881	Transcripts from merged genes (BRAKER)	17.6019
MSTRG.10904.2	23.6746	9.76707	13.8928	19.6588	20.5464	12.1599	Transcripts from merged genes (BRAKER)	16.6166
MSTRG.10906.2	0	0	0	0.694803	0.393074	0.1587	Novel transcript variants (BRAKER)	0.415526
MSTRG.10907.1	0.392263	0.0535499	0.080091	2.07686	0.892751	2.24057	Novel transcripts (BRAKER)	0.956014
MSTRG.10908.1	7.81866	20.7374	34.107	45.5853	17.3823	78.6859	Novel transcript variants (BRAKER)	34.0528
MSTRG.10909.1	0.062987	0.0773883	0.115744	9.59374	14.0175	11.8257	Novel transcript variants (BRAKER)	5.94885
MSTRG.10909.3	0.21132	0.259636	0.181216	11.7239	20.4024	16.9091	Novel transcript variants (BRAKER)	8.28126
MSTRG.1091.1	27.2215	38.3846	36.4436	8.34001	9.45304	8.89964	Novel transcript variants (BRAKER)	21.4571
MSTRG.10911.1	307.111	301.437	216.981	85.1911	117.735	62.6836	Novel transcript variants (BRAKER)	181.857
MSTRG.10912.2	165.622	198.206	205.033	211.147	134.669	269.778	Novel transcript variants (BRAKER)	197.409
MSTRG.10913.1	44.7726	35.0561	32.1885	35.6837	34.5486	41.6083	Transcripts from merged genes (BRAKER)	37.3096
MSTRG.10914.1	0.743202	1.32819	2.04856	3.99561	1.1595	5.17216	Novel transcripts (BRAKER)	2.40787
MSTRG.10915.1	5.24458	2.57748	4.42332	2.16268	0.53601	3.29122	Novel transcripts (BRAKER)	3.03921
MSTRG.10916.2	1.34907	1.78837	1.41349	0.0906265	0.176883	0.119025	Novel transcript variants (BRAKER)	0.82291
MSTRG.10917.1	3.16265	2.53419	2.52682	6.43533	5.55701	18.7478	Novel transcript variants (BRAKER)	6.49397
MSTRG.10918.1	0	0.0253063	0.0126163	0	0	0	Novel transcripts (BRAKER)	0.0189613
MSTRG.10919.2	1.44369	2.08419	1.77967	1.38201	1.03899	0.947873	Novel transcript variants (BRAKER)	1.44607
MSTRG.1092.1	14.4515	18.3918	18.3614	10.7668	11.0024	10.5634	Novel transcript variants (BRAKER)	13.9229
MSTRG.10920.1	2.37816	0.447373	0.822442	18.4448	10.4883	24.2373	Novel transcripts (BRAKER)	9.46973
MSTRG.10921.1	210.582	180.594	165.201	49.4984	49.5437	38.4902	Novel transcript variants (BRAKER)	115.652
MSTRG.10922.2	0	0	0	0.0926842	0.0634734	0.108914	Novel transcript variants (BRAKER)	0.0883572
MSTRG.10922.3	0	0	0	7.62288	3.38988	14.9848	Novel transcript variants (BRAKER)	8.66584
MSTRG.10923.1	0.0705191	0	0.0575936	0.640059	0.637641	0.341504	Novel transcript variants (BRAKER)	0.349463
MSTRG.10924.1	3.85978	19.3876	14.4636	7.34145	15.3344	7.35833	Novel transcripts (BRAKER)	11.2909
MSTRG.10925.1	0.109696	0.134777	0	151.587	152.609	205.218	Novel transcripts (BRAKER)	101.932
MSTRG.10926.1	0.0107998	0.026538	0.0330759	0.220551	0.334808	0.120693	Novel transcripts (BRAKER)	0.124411
MSTRG.10927.1	2.19529	1.11142	0.82438	19.0273	24.526	22.45	Novel transcript variants (BRAKER)	11.6891
MSTRG.10928.1	0	0	0	0.209431	0.0583948	0.314352	Novel transcripts (BRAKER)	0.194059
MSTRG.10929.1	1.36511	0.524134	0.739117	0.435596	0.499316	0.395016	Novel transcript variants (BRAKER)	0.659715
MSTRG.1093.1	9.05916	6.83145	4.76686	5.10766	5.3157	5.24744	Novel transcript variants (BRAKER)	6.05471
MSTRG.10930.2	0	0	0	0.0257995	0	0	Novel transcript variants (BRAKER)	0.0257995
MSTRG.10931.1	431.95	327.65	218.777	243.603	291.993	379.9	Novel transcript variants (BRAKER)	315.646
MSTRG.10932.1	18.0104	12.9479	10.7729	9.83696	12.6436	8.50792	Novel transcript variants (BRAKER)	12.1199
MSTRG.10933.1	0.88477	1.53688	1.79404	1.16823	0.878274	2.11393	Novel transcript variants (BRAKER)	1.39602
MSTRG.10933.2	0.48069	0.834979	0.97469	0.634693	0.477161	1.14849	Novel transcript variants (BRAKER)	0.75845
MSTRG.10934.1	20.1263	35.8885	25.014	0.416716	0.37606	0.441368	Novel transcript variants (BRAKER)	13.7105
MSTRG.10935.1	33.4328	36.8119	30.9771	27.7468	36.0318	26.4279	Novel transcript variants (BRAKER)	31.9047
MSTRG.10936.1	40.1627	13.1444	17.4391	18.9529	24.1758	16.9213	Novel transcript variants (BRAKER)	21.7993
MSTRG.10937.1	143.703	186.583	166.42	45.5202	62.4879	32.8066	Novel transcript variants (BRAKER)	106.253
MSTRG.10937.3	66.7316	104.793	114.083	61.7123	56.6609	67.0224	Novel transcript variants (BRAKER)	78.5005
MSTRG.10937.4	69.5682	109.19	119.056	64.703	58.9582	70.3891	Novel transcript variants (BRAKER)	81.9775
MSTRG.10937.5	8.25829	10.0175	11.5423	14.337	9.64721	18.1453	Novel transcript variants (BRAKER)	11.9913
MSTRG.10938.1	23.845	22.7069	17.9281	7.24763	6.03866	6.37575	Novel transcript variants (BRAKER)	14.0237
MSTRG.10938.3	5.31221	6.98543	6.26155	2.19903	2.6388	1.9254	Novel transcript variants (BRAKER)	4.2204
MSTRG.1094.1	0	0	0.16781	0	0.0689383	0.139166	Novel transcript variants (BRAKER)	0.125305
MSTRG.10940.1	10.2511	1.91923	5.92033	8.30743	2.48619	20.7302	Novel transcripts (BRAKER)	8.26908
MSTRG.10941.1	0.375777	0.106545	0.132793	0.522673	0.576081	0.41995	Novel transcript variants (BRAKER)	0.355637
MSTRG.10942.1	0.460518	0.56581	0.902661	0.104496	0.0339922	0.137241	Novel transcripts (BRAKER)	0.367453
MSTRG.10943.1	3.81687	2.25615	1.8559	23.7727	42.7105	20.2284	Novel transcript variants (BRAKER)	15.7734
MSTRG.10944.1	62.5968	78.4873	63.2073	67.9898	109.111	59.6188	Transcripts from merged genes (BRAKER)	73.5018
MSTRG.10944.3	8.79386	10.0768	8.38757	17.7296	27.3715	11.4923	Transcripts from merged genes (BRAKER)	13.9753
MSTRG.10945.1	24.2916	36.9614	26.941	17.8258	31.0545	12.39	Novel transcript variants (BRAKER)	24.9107
MSTRG.10946.1	65.0416	77.431	59.3889	20.3102	27.2661	18.3223	Novel transcript variants (BRAKER)	44.6267
MSTRG.10948.1	57.3073	67.6167	63.3648	25.9465	40.2396	32.5824	Novel transcript variants (BRAKER)	47.8429
MSTRG.10949.2	83.981	109.866	95.5333	47.6127	38.64	67.1465	Novel transcript variants (BRAKER)	73.7967
MSTRG.10949.3	86.4024	115.59	99.1615	46.2573	38.5949	64.8686	Novel transcript variants (BRAKER)	75.1458
MSTRG.1095.1	0	0	0	4.25887	2.36031	16.0207	Novel transcripts (BRAKER)	7.54661
MSTRG.10952.1	0.251948	0.0386941	0.0964537	188.203	144.551	276.32	Novel transcript variants (BRAKER)	101.577
MSTRG.10953.1	0	0	0	2.90374	1.09718	6.98779	Novel transcripts (BRAKER)	3.6629
MSTRG.10954.1	0	0	0	8.03751	8.39007	10.7137	Novel transcripts (BRAKER)	9.04709
MSTRG.10955.1	0.0181468	0.0334438	0.00555774	6.07616	2.71243	6.36791	Novel transcript variants (BRAKER)	2.53561
MSTRG.10955.3	0.720145	0.660799	0.731463	1.17126	1.59973	0.957608	Novel transcript variants (BRAKER)	0.973501
MSTRG.10956.1	0.966544	0.58832	0.575744	0.399904	0.279811	0.505397	Novel transcripts (BRAKER)	0.55262
MSTRG.10959.1	41.2871	47.4675	40.4945	12.9659	17.8084	11.3675	Novel transcript variants (BRAKER)	28.5652
MSTRG.10959.2	128.506	160.015	138.103	42.7239	60.1713	37.1391	Novel transcript variants (BRAKER)	94.4429
MSTRG.1096.2	31.064	37.8939	38.8709	32.0969	33.4113	21.0773	Transcripts from merged genes (BRAKER)	32.4024
MSTRG.10960.1	4.04522	1.19474	3.75247	5.5769	3.83286	5.10756	Novel transcript variants (BRAKER)	3.91829
MSTRG.10960.2	4.43579	1.35598	4.16009	6.21251	4.27681	5.66878	Novel transcript variants (BRAKER)	4.35166
MSTRG.10960.3	3.06376	0.936561	2.87334	4.29092	2.96207	3.91537	Novel transcript variants (BRAKER)	3.007
MSTRG.10961.1	0.236883	0.103944	0.362746	1.2238	0.309111	0.680732	Novel transcript variants (BRAKER)	0.486203
MSTRG.10962.1	0	0	0	1.80004	0.780313	5.06087	Novel transcripts (BRAKER)	2.54708
MSTRG.10963.1	7.27065	9.1733	7.2641	2.51454	3.75732	2.13521	Novel transcript variants (BRAKER)	5.35252
MSTRG.10963.2	7.24942	9.14374	7.24254	2.51483	3.76191	2.13968	Novel transcript variants (BRAKER)	5.34202
MSTRG.10964.1	0	0.00533752	0	0	0	0	Novel transcripts (BRAKER)	0.00533752
MSTRG.10965.1	0.892437	1.96323	1.82476	0.202503	0.221147	0.206593	Novel transcript variants (BRAKER)	0.88511
MSTRG.10965.2	0.890692	1.95939	1.82119	0.202107	0.220714	0.206189	Novel transcript variants (BRAKER)	0.88338
MSTRG.10966.1	0.0150431	0.00924128	0.016893	0.0704019	0.129081	0.198935	Novel transcript variants (BRAKER)	0.073266
MSTRG.10967.1	0.372317	0.050827	0.55747	6.89939	2.86269	15.9498	Novel transcripts (BRAKER)	4.44876
MSTRG.10968.1	21.8447	50.0799	49.9715	26.6876	37.732	18.5481	Novel transcript variants (BRAKER)	34.1439
MSTRG.10968.2	10.991	25.1974	25.1429	13.4277	18.9847	9.33236	Novel transcript variants (BRAKER)	17.1793
MSTRG.10968.3	11.3703	24.8681	23.8294	12.3092	18.0269	8.41581	Novel transcript variants (BRAKER)	16.4699
MSTRG.10969.1	2.28328	1.74124	3.11063	4.3212	1.26402	7.21509	Novel transcripts (BRAKER)	3.32258
MSTRG.1097.1	0	0	0	0.600184	0.676191	0.740192	Novel transcript variants (BRAKER)	0.672189
MSTRG.10971.1	3.46962	6.00268	7.85685	4.5025	1.37067	5.86712	Novel transcript variants (BRAKER)	4.84491
MSTRG.10971.2	27.1443	46.3747	61.215	40.616	14.0773	54.0966	Novel transcript variants (BRAKER)	40.5873
MSTRG.10972.1	24.0037	9.24441	18.6823	27.8892	7.63982	37.818	Novel transcript variants (BRAKER)	20.8796
MSTRG.10972.2	13.9929	5.27578	10.9134	16.2877	4.44681	22.06	Novel transcript variants (BRAKER)	12.1628
MSTRG.10973.1	3.15511	3.03537	2.35194	9.19389	8.74978	4.75676	Transcripts from merged genes (BRAKER)	5.20714
MSTRG.10973.4	0.208674	0.128193	0.10043	0.405859	0.32181	0.199889	Transcripts from merged genes (BRAKER)	0.227476
MSTRG.10975.1	18.8475	14.5569	11.9501	14.8266	20.5747	12.8523	Transcripts from merged genes (BRAKER)	15.6014
MSTRG.10975.2	47.7255	36.8607	30.26	37.5439	52.0991	32.5446	Transcripts from merged genes (BRAKER)	39.5056
MSTRG.10979.2	0	0.021889	0.0218253	0.151595	0.167666	0.199099	Novel transcript variants (BRAKER)	0.112415
MSTRG.10979.3	0	0	0	0.18359	0.194094	0.150699	Novel transcript variants (BRAKER)	0.176127
MSTRG.10979.4	0	0	0	0.110766	0.144127	0.145475	Novel transcript variants (BRAKER)	0.133456
MSTRG.10980.1	69.196	74.8604	60.4561	30.6829	46.5125	23.8919	Novel transcripts (BRAKER)	50.9333
MSTRG.10981.2	0	0	0	0	0	0	Novel transcript variants (BRAKER)	#DIV/0!
MSTRG.10982.1	0	0	0	36.6037	20.9069	77.0046	Novel transcripts (BRAKER)	44.8384
MSTRG.10983.1	0.174512	0.0357354	0.0712627	0.494981	0.515251	0.812608	Novel transcript variants (BRAKER)	0.350725
MSTRG.10984.1	40.523	29.0842	24.7124	20.1047	14.5361	28.3477	Novel transcript variants (BRAKER)	26.218
MSTRG.10984.3	80.8693	48.3411	42.4769	29.0225	36.6735	38.1638	Novel transcript variants (BRAKER)	45.9245
MSTRG.10985.2	143.982	128.205	101.086	21.8356	21.2472	20.7202	Novel transcript variants (BRAKER)	72.846
MSTRG.10986.1	0.425902	0.483027	0.321081	3.81919	3.42785	5.23563	Novel transcript variants (BRAKER)	2.28545
MSTRG.10987.1	0.0845279	0.103854	0.077664	0.539443	0.491342	0.755714	Novel transcripts (BRAKER)	0.342091
MSTRG.10988.1	41.0407	37.7626	34.5242	26.9607	28.0998	19.4472	Transcripts from merged genes (BRAKER)	31.3058
MSTRG.10989.1	0.22358	0	0.0456499	148.139	259.264	156.58	Novel transcript variants (BRAKER)	112.85
MSTRG.1099.2	0	0	0	0	0	0	Novel transcript variants (BRAKER)	#DIV/0!
MSTRG.10991.1	0	0	0	0.0417459	0.162958	0	Novel transcript variants (BRAKER)	0.102352
MSTRG.10992.1	13.7367	38.0479	27.8758	6.76254	11.6914	5.45531	Novel transcript variants (BRAKER)	17.2616
MSTRG.10995.2	0.0292305	0.0179569	0.0179046	0.0373088	0.0242729	0.0489998	Novel transcript variants (BRAKER)	0.0292789
MSTRG.10996.1	0.210141	0.321517	0.279294	0.846825	0.755072	0.917219	Novel transcript variants (BRAKER)	0.555011
MSTRG.10997.1	0	0	0	0.00341448	0	0.00448443	Novel transcripts (BRAKER)	0.00394946
MSTRG.10998.1	0	0	0	0.0242738	0.0180485	0.0637604	Novel transcript variants (BRAKER)	0.0353609
MSTRG.10999.1	33.0682	24.2483	33.1801	10.2726	4.99795	15.3687	Novel transcript variants (BRAKER)	20.1893
MSTRG.11.1	47.578	62.2284	77.1058	49.2807	25.1896	80.0524	Novel transcript variants (BRAKER)	56.9058
MSTRG.110.1	45.7622	40.1255	29.0539	34.553	52.8041	30.1893	Novel transcript variants (BRAKER)	38.748
MSTRG.1100.1	0.0192564	0.0236591	0.0117951	0	0	0	Novel transcript variants (BRAKER)	0.0182369
MSTRG.11000.1	44.7928	51.1591	46.4953	41.8236	26.1606	53.2066	Transcripts from merged genes (BRAKER)	43.9397
MSTRG.11002.1	0	0	0	0.152897	0.0331581	0	Novel transcripts (BRAKER)	0.0930278
MSTRG.11003.1	8.08816	12.0956	20.1923	25.8608	11.9855	33.9188	Novel transcript variants (BRAKER)	18.6902
MSTRG.11004.1	69.7125	27.5096	34.6946	130.585	146.599	90.8918	Novel transcript variants (BRAKER)	83.332
MSTRG.11005.1	176.513	217.381	177.368	84.5767	73.798	77.8833	Novel transcript variants (BRAKER)	134.587
MSTRG.11006.1	7.26765	5.78681	4.79557	6.39646	9.1173	5.99561	Novel transcripts (BRAKER)	6.5599
MSTRG.11007.1	16.436	20.0727	22.7527	43.1315	22.6199	71.8558	Novel transcripts (BRAKER)	32.8114
MSTRG.11008.1	116.395	137.807	167.207	183.135	115.27	223.407	Transcripts from merged genes (BRAKER)	157.203
MSTRG.11008.2	119.628	141.635	171.852	188.222	118.472	229.613	Transcripts from merged genes (BRAKER)	161.57
MSTRG.1101.1	17.5586	15.8082	16.7353	3.23023	2.14759	3.42699	Novel transcript variants (BRAKER)	9.81782
MSTRG.11010.1	8.70484	5.92141	6.65359	16.636	8.26046	21.2485	Novel transcript variants (BRAKER)	11.2375
MSTRG.11011.1	1.24823	1.15022	1.44725	2.92088	2.17178	1.66898	Novel transcript variants (BRAKER)	1.76789
MSTRG.11012.1	38.2549	50.7823	41.1558	10.3607	16.6555	6.60575	Novel transcript variants (BRAKER)	27.3025
MSTRG.11012.3	20.1259	23.5883	16.5706	31.002	50.9074	19.7488	Novel transcript variants (BRAKER)	26.9905
MSTRG.11013.1	0.614453	0.33553	0.209096	9.70168	11.8678	11.1395	Novel transcript variants (BRAKER)	5.64468
MSTRG.11014.1	0.704061	0.807368	0.690015	2.03692	2.05277	3.40957	Novel transcript variants (BRAKER)	1.61678
MSTRG.11014.3	0	0	0	0.00667263	0.00434118	0	Novel transcript variants (BRAKER)	0.0055069
MSTRG.11015.1	0	0	0	0	0.0046835	0.00945461	Novel transcript variants (BRAKER)	0.00706906
MSTRG.11016.1	0	0.155782	0	0.647332	0.42115	0.283393	Novel transcript variants (BRAKER)	0.376914
MSTRG.11017.1	61.5121	104.679	108.133	65.7785	45.6008	70.5315	Novel transcript variants (BRAKER)	76.0391
MSTRG.11018.1	153.813	153.335	117.233	88.9522	112.786	102.416	Novel transcripts (BRAKER)	121.422
MSTRG.11019.1	42.8258	38.7676	27.4081	24.5453	32.4831	25.7271	Transcripts from merged genes (BRAKER)	31.9595
MSTRG.1102.1	0.0321151	0	0.039343	0.177626	0.577812	0.197396	Novel transcript variants (BRAKER)	0.204858
MSTRG.11020.2	129.538	131.898	126.008	39.8149	53.7181	33.2641	Novel transcript variants (BRAKER)	85.7069
MSTRG.11021.2	0.0281354	0	0.0057446	0.0718222	0.150565	0.0419236	Novel transcript variants (BRAKER)	0.0596381
MSTRG.11021.3	0.250976	0.15418	0.138358	0.526778	1.005	0.617053	Novel transcript variants (BRAKER)	0.448724
MSTRG.11022.1	0	0	0	2.24789	1.58964	4.23589	Novel transcripts (BRAKER)	2.69114
MSTRG.11024.1	20.5023	39.0954	33.223	17.6917	22.4198	16.1235	Novel transcript variants (BRAKER)	24.8426
MSTRG.11024.3	143.074	90.6779	81.5149	262.376	293.659	372.909	Novel transcript variants (BRAKER)	207.369
MSTRG.11025.1	9.91029	2.63269	4.23285	4.7064	5.87926	3.39741	Novel transcript variants (BRAKER)	5.12648
MSTRG.11026.1	0.018793	0	0.00575566	21.9239	30.301	23.5329	Novel transcripts (BRAKER)	15.1565
MSTRG.11027.1	4.39797	10.6934	10.5695	0.665453	0.712256	1.1653	Transcripts from merged genes (BRAKER)	4.70065
MSTRG.11027.2	4.29637	10.4769	10.3412	0.647603	0.706742	1.17977	Transcripts from merged genes (BRAKER)	4.6081
MSTRG.11028.2	7.48055	1.73444	2.56984	1.42573	1.50457	1.54813	Novel transcript variants (BRAKER)	2.71054
MSTRG.11029.1	19.0093	26.6433	20.0744	6.549	11.3889	5.35908	Novel transcript variants (BRAKER)	14.8373
MSTRG.1103.1	46.5652	28.2148	28.4186	31.0385	16.8644	41.6659	Novel transcript variants (BRAKER)	32.1279
MSTRG.11030.1	6.92551	3.29254	2.90316	4.56059	5.92255	3.1945	Novel transcripts (BRAKER)	4.46648
MSTRG.11031.1	6.51991	5.05541	4.6972	0.977345	0.620893	1.04198	Novel transcript variants (BRAKER)	3.15212
MSTRG.11032.1	0.0538647	0.00827254	0.0288696	3.78131	2.04263	8.02119	Novel transcripts (BRAKER)	2.32269
MSTRG.11033.1	0.123944	0.0585702	0.0992795	0.194705	0.0633371	0.170478	Transcripts from merged genes (BRAKER)	0.118386
MSTRG.11034.1	0.0399032	0	0.00814732	0.11318	0.0220903	0.0445938	Novel transcript variants (BRAKER)	0.045583
MSTRG.11035.1	95.4658	182.525	187.604	73.8248	56.0257	109.95	Novel transcript variants (BRAKER)	117.566
MSTRG.11036.1	88.4247	112.355	82.3834	28.7991	64.8057	21.0419	Novel transcript variants (BRAKER)	66.3016
MSTRG.11037.1	0	0	0	1.58943	1.02029	3.67398	Novel transcript variants (BRAKER)	2.09457
MSTRG.11038.1	5.14679	1.23863	2.47005	104.565	46.4692	195.858	Novel transcripts (BRAKER)	59.2912
MSTRG.11039.1	0.483064	1.28074	0.770876	0.0919442	0.102043	0.0497229	Novel transcript variants (BRAKER)	0.463064
MSTRG.1104.1	4.06042	3.29434	2.87612	4.44846	6.1789	4.12912	Novel transcript variants (BRAKER)	4.16456
MSTRG.1104.3	0.0339582	0	0	20.7036	20.8577	25.9957	Novel transcript variants (BRAKER)	16.8977
MSTRG.11040.1	0	0	0	14.9841	11.7403	19.3765	Novel transcripts (BRAKER)	15.367
MSTRG.11041.1	29.8949	32.7868	25.6939	11.4394	20.5754	9.80702	Novel transcript variants (BRAKER)	21.6996
MSTRG.11042.1	0.0182145	0.134274	0.0892557	0.278981	0.332756	0.264623	Novel transcript variants (BRAKER)	0.186351
MSTRG.11043.1	25.6303	28.8031	25.2359	25.2099	22.951	32.843	Novel transcript variants (BRAKER)	26.7789
MSTRG.11044.1	12.7077	11.7766	12.0571	74.3128	65.4808	124.456	Novel transcript variants (BRAKER)	50.1319
MSTRG.11045.1	1.04603	0.749699	1.17467	8.6783	11.1473	10.2287	Novel transcript variants (BRAKER)	5.50412
MSTRG.11046.1	4.21583	2.45356	2.31051	1.51044	1.22836	1.36383	Novel transcript variants (BRAKER)	2.18042
MSTRG.11046.2	2.81055	1.63571	1.58564	1.13283	0.818904	0.909218	Novel transcript variants (BRAKER)	1.48214
MSTRG.11047.1	31.7923	41.2911	38.5067	31.499	50.2712	21.7163	Novel transcript variants (BRAKER)	35.8461
MSTRG.11048.1	0.0338992	0.0416499	0	8.19205	2.64608	14.9642	Novel transcript variants (BRAKER)	5.17558
MSTRG.11048.3	0.140138	0.0573932	0.114452	22.6566	11.4043	31.6878	Novel transcript variants (BRAKER)	11.0101
MSTRG.11049.1	0.0268953	0	0.0164742	0.0686564	0.119113	0.120227	Novel transcripts (BRAKER)	0.0702733
MSTRG.11050.1	11.8931	7.52425	5.98013	26.0551	35.2784	27.5741	Novel transcript variants (BRAKER)	19.0508
MSTRG.11051.2	0.317209	0.0866078	0.237478	0.83974	1.19022	0.984713	Novel transcript variants (BRAKER)	0.609328
MSTRG.11051.3	0.476557	0.189897	0.205123	0.569903	0.748681	0.359849	Novel transcript variants (BRAKER)	0.425002
MSTRG.11051.4	0.910664	0.362879	0.391975	1.08904	1.43067	0.687644	Novel transcript variants (BRAKER)	0.812146
MSTRG.11052.2	0.710513	0.48498	1.09609	1.50026	1.28199	0.941078	Novel transcript variants (BRAKER)	1.00249
MSTRG.11053.1	1.20845	0.703301	0.798649	5.43907	2.74639	5.93509	Novel transcript variants (BRAKER)	2.80516
MSTRG.11053.2	3.94674	2.29695	2.60836	17.7638	8.96961	19.3838	Novel transcript variants (BRAKER)	9.16153
MSTRG.11054.1	14.9226	27.9966	24.5197	8.66649	14.3985	8.78852	Novel transcript variants (BRAKER)	16.5487
MSTRG.11055.1	18.3458	6.89833	11.9603	18.9732	6.84009	22.7205	Novel transcript variants (BRAKER)	14.2897
MSTRG.11055.2	9.43203	3.5466	6.14906	9.75458	3.51666	11.6811	Novel transcript variants (BRAKER)	7.34668
MSTRG.11056.1	0.00915852	0	0.0168296	0.093517	0.0354909	0.0921159	Novel transcripts (BRAKER)	0.0494224
MSTRG.11057.2	8.22017	8.84594	6.31514	5.86938	8.18397	5.94793	Novel transcript variants (BRAKER)	7.23042
MSTRG.11058.1	70.4877	55.3914	38.2603	52.0193	88.0609	59.9227	Novel transcript variants (BRAKER)	60.6904
MSTRG.11059.1	83.2725	43.7471	39.5392	138.783	95.1874	213.078	Novel transcript variants (BRAKER)	102.268
MSTRG.1106.1	0.0806858	0	0	1.16716	2.45671	1.71324	Novel transcript variants (BRAKER)	1.35445
MSTRG.11060.1	91.3075	75.4058	119.313	85.8556	36.8095	183.029	Novel transcript variants (BRAKER)	98.6201
MSTRG.11061.2	38.4542	48.8865	34.7824	3.72987	4.70987	3.11732	Novel transcript variants (BRAKER)	22.28
MSTRG.11061.3	36.8253	46.7882	33.2929	3.56264	4.54084	2.97756	Novel transcript variants (BRAKER)	21.3312
MSTRG.11062.1	0.2319	0.256429	0.355115	50.9496	87.8114	54.7863	Novel transcript variants (BRAKER)	32.3985
MSTRG.11063.2	0	0	0.045304	13.4681	23.5025	12.1505	Novel transcript variants (BRAKER)	12.2916
MSTRG.11064.1	0	0	0	48.4679	76.6859	44.0789	Novel transcript variants (BRAKER)	56.4109
MSTRG.11065.1	26.5553	8.03677	11.5417	7.47669	6.43167	5.56442	Novel transcript variants (BRAKER)	10.9344
MSTRG.11066.1	3.0698	3.64802	2.99007	4.75322	3.09242	5.17411	Novel transcripts (BRAKER)	3.78794
MSTRG.11067.1	40.1367	56.4773	41.6325	24.6915	18.3161	35.7247	Novel transcript variants (BRAKER)	36.1631
MSTRG.11068.1	0.191431	0	0	179.343	255.084	135.527	Novel transcript variants (BRAKER)	142.536
MSTRG.11069.1	1.09389	2.4528	1.79236	0.954075	1.02948	0.702925	Novel transcript variants (BRAKER)	1.33759
MSTRG.1107.1	0.0302259	0.11141	0.148115	46.2181	65.2253	49.52	Novel transcript variants (BRAKER)	26.8755
MSTRG.11070.2	130.105	132.53	138.747	37.845	35.9192	38.7176	Novel transcript variants (BRAKER)	85.6441
MSTRG.11073.1	24.4756	23.7393	17.857	11.1474	16.9684	8.7285	Novel transcript variants (BRAKER)	17.1527
MSTRG.11073.2	50.8429	49.3135	37.0941	23.1565	35.2485	18.1317	Novel transcript variants (BRAKER)	35.6312
MSTRG.11074.1	212.64	216.177	150.686	111.831	173.131	71.8183	Novel transcript variants (BRAKER)	156.047
MSTRG.11075.1	0.159179	0.0325956	0	40.4761	74.7267	33.7103	Novel transcript variants (BRAKER)	29.821
MSTRG.11076.1	5.8038	3.70358	4.0235	1.95244	2.44086	2.96648	Novel transcripts (BRAKER)	3.48178
MSTRG.11077.1	0	0.0320727	0.0319793	126.655	73.2533	219.379	Novel transcript variants (BRAKER)	83.8703
MSTRG.11078.1	41.5755	32.1646	25.4975	34.7697	53.963	33.6435	Transcripts from merged genes (BRAKER)	36.9356
MSTRG.11079.1	11.0983	15.0343	14.0922	15.2365	18.0684	14.5556	Novel transcript variants (BRAKER)	14.6809
MSTRG.1108.1	0	0	0	19.0085	10.321	32.4853	Novel transcript variants (BRAKER)	20.6049
MSTRG.11080.1	17.6306	16.4549	14.3479	17.6038	25.3311	19.6031	Novel transcript variants (BRAKER)	18.4953
MSTRG.11081.1	38.9144	43.5037	38.4497	24.6883	20.325	24.8947	Novel transcript variants (BRAKER)	31.7959
MSTRG.11082.1	1.36228	1.51434	0.814569	138.66	290.852	141.838	Novel transcript variants (BRAKER)	95.8401
MSTRG.11082.2	1.27343	1.41558	0.761445	129.617	271.95	132.588	Novel transcript variants (BRAKER)	89.6008
MSTRG.11083.1	0.051656	0.0475999	0.071192	0.241751	0.185878	0.101024	Novel transcript variants (BRAKER)	0.116517
MSTRG.11085.1	64.6814	86.7512	75.2493	54.7709	81.5477	46.9691	Transcripts from merged genes (BRAKER)	68.3283
MSTRG.11085.2	67.5142	90.5505	78.5449	57.1697	85.1191	49.0261	Transcripts from merged genes (BRAKER)	71.3207
MSTRG.11085.3	110.112	147.684	128.103	93.241	138.825	79.9593	Transcripts from merged genes (BRAKER)	116.321
MSTRG.11085.4	277.292	368.515	318.964	232.461	346.257	199.361	Transcripts from merged genes (BRAKER)	290.475
MSTRG.11086.1	0.545757	0.372521	0.631442	1.44477	1.07424	1.15205	Novel transcripts (BRAKER)	0.87013
MSTRG.11087.1	37.4247	68.8473	58.9915	52.7868	77.2994	52.5074	Novel transcript variants (BRAKER)	57.9762
MSTRG.11087.3	4.83771	14.6578	14.0117	12.6474	17.8987	12.4273	Novel transcript variants (BRAKER)	12.7468
MSTRG.11089.1	0.0273473	0.0168	0.125633	0.558483	0.310358	0.366744	Novel transcript variants (BRAKER)	0.234227
MSTRG.1109.1	30.5332	22.8144	21.0125	17.4782	28.0518	11.531	Novel transcript variants (BRAKER)	21.9035
MSTRG.1109.2	331.318	247.56	228.008	189.657	304.392	125.124	Novel transcript variants (BRAKER)	237.677
MSTRG.1109.3	210.432	157.234	144.816	120.458	193.33	79.4706	Novel transcript variants (BRAKER)	150.957
MSTRG.1109.4	9.74465	7.28118	6.70613	5.57814	8.9527	3.68012	Novel transcript variants (BRAKER)	6.99049
MSTRG.11090.1	0.063396	0.147127	0.107867	0.209784	0.050694	0.110208	Novel transcript variants (BRAKER)	0.114846
MSTRG.11090.3	0.169791	0.391147	0.299007	0.541789	0.152743	0.308344	Novel transcript variants (BRAKER)	0.31047
MSTRG.11091.1	30.4227	9.18341	11.2015	37.7497	29.8366	39.9118	Transcripts from merged genes (BRAKER)	26.3843
MSTRG.11093.1	0	0	0	0.0758669	0.0370189	0.199281	Novel transcripts (BRAKER)	0.104056
MSTRG.11094.1	10.6984	16.8076	13.1062	35.0703	33.7879	23.3239	Novel transcripts (BRAKER)	22.1324
MSTRG.11095.1	43.8869	102.359	114.875	50.161	36.1347	73.8805	Novel transcript variants (BRAKER)	70.2163
MSTRG.11096.1	0.687995	0.684289	0.712398	2.42532	1.60511	1.59266	Novel transcript variants (BRAKER)	1.28463
MSTRG.11097.2	0	0	0	0.100331	0.0652749	0	Novel transcript variants (BRAKER)	0.0828031
MSTRG.11098.1	0	0.0653095	0.0325597	3.43756	5.91483	5.3464	Novel transcript variants (BRAKER)	2.95933
MSTRG.11098.2	0	0.0312375	0.0155733	1.64418	2.84313	2.614	Novel transcript variants (BRAKER)	1.42962
MSTRG.111.1	216.943	197.622	150.197	51.3592	86.1477	40.4477	Novel transcript variants (BRAKER)	123.786
MSTRG.1110.1	6.73858	9.45272	7.89767	3.97312	6.56502	3.29098	Novel transcripts (BRAKER)	6.31968
MSTRG.1110.2	5.23164	7.31352	6.13153	3.08462	5.08549	2.55502	Novel transcripts (BRAKER)	4.9003
MSTRG.11101.2	0.0568441	0.0349205	0.0261141	0.169293	0.0314688	0.0952893	Novel transcript variants (BRAKER)	0.0689882
MSTRG.11102.1	0.0135786	0	0.0166346	0.265745	0.233029	0.531115	Novel transcripts (BRAKER)	0.21202
MSTRG.11103.1	0	0	0	5.33356	2.39744	9.82805	Novel transcripts (BRAKER)	5.85302
MSTRG.11104.1	23.9401	47.4065	40.2387	128.412	135.493	175.15	Novel transcript variants (BRAKER)	91.7733
MSTRG.11105.1	0.880361	0.582425	0.663691	5.27258	4.3488	3.40563	Novel transcript variants (BRAKER)	2.52558
MSTRG.11107.1	13.4408	5.91543	10.1171	11.38	14.0672	8.29506	Novel transcripts (BRAKER)	10.5359
MSTRG.11107.2	10.9496	4.77156	8.22681	9.22538	11.347	6.75132	Novel transcripts (BRAKER)	8.54529
MSTRG.11108.1	0	0.0631325	0.0944231	0.39351	0.0853384	0.287122	Novel transcript variants (BRAKER)	0.184705
MSTRG.11109.1	0	0	0	8.50582	4.98529	10.3244	Novel transcripts (BRAKER)	7.93849
MSTRG.1111.1	55.2449	50.1551	53.1527	65.5559	62.4079	91.702	Novel transcript variants (BRAKER)	63.0364
MSTRG.1111.3	31.8068	32.6395	50.7682	34.7819	14.5075	71.6081	Novel transcript variants (BRAKER)	39.352
MSTRG.11110.1	28.5041	20.0177	23.8436	58.3657	30.5343	90.4073	Novel transcript variants (BRAKER)	41.9455
MSTRG.11111.1	0	0	0.26877	2.14686	2.48983	6.12956	Novel transcript variants (BRAKER)	2.75876
MSTRG.11112.2	0.0483316	0	0.0888138	0.945895	1.73916	1.45835	Novel transcript variants (BRAKER)	0.85611
MSTRG.11113.1	2.82613	0.856799	2.13576	4.06002	2.09282	3.85563	Novel transcript variants (BRAKER)	2.63786
MSTRG.11114.1	0	0	0	3.62119	5.84183	2.96975	Novel transcript variants (BRAKER)	4.14426
MSTRG.11116.1	10.7446	14.21	11.2606	10.7981	18.4572	6.90142	Novel transcripts (BRAKER)	12.062
MSTRG.11117.1	154.912	193.197	174.006	153.283	139.232	224.875	Transcripts from merged genes (BRAKER)	173.251
MSTRG.11118.1	86.6834	65.0648	56.2978	114.206	190.914	93.4566	Novel transcript variants (BRAKER)	101.104
MSTRG.11119.1	0	0	0.0114562	0.41378	0.797254	0.79426	Novel transcript variants (BRAKER)	0.504188
MSTRG.11120.1	0.0565423	0	0.0230893	0.112263	0.0834712	0.021063	Novel transcript variants (BRAKER)	0.0592857
MSTRG.11121.1	4.94805	2.75344	8.31782	8.45847	1.67056	8.85248	Novel transcript variants (BRAKER)	5.83347
MSTRG.11122.1	22.5011	24.8568	26.7689	11.9079	11.2243	10.221	Novel transcript variants (BRAKER)	17.9134
MSTRG.11122.2	89.0102	98.8792	105.326	45.9528	44.2606	39.0227	Novel transcript variants (BRAKER)	70.4085
MSTRG.11123.2	11.0027	16.184	16.6589	12.593	11.1527	17.1453	Novel transcript variants (BRAKER)	14.1228
MSTRG.11124.1	2.52689	2.99419	2.83559	3.31872	4.68874	2.46117	Novel transcript variants (BRAKER)	3.13755
MSTRG.11125.1	3.74698	7.05975	8.3362	8.77097	4.11192	14.0234	Novel transcripts (BRAKER)	7.67487
MSTRG.11126.1	12.3018	9.57291	7.83933	7.15686	4.6091	9.56859	Novel transcript variants (BRAKER)	8.5081
MSTRG.11127.1	10.0498	11.4174	9.49735	3.10128	1.7391	2.78021	Transcripts from merged genes (BRAKER)	6.43086
MSTRG.11128.1	26.8241	11.9005	11.2761	82.3697	122.05	101.768	Novel transcript variants (BRAKER)	59.3647
MSTRG.11129.2	29.8602	23.0275	15.3518	13.2931	28.2524	10.1494	Novel transcript variants (BRAKER)	19.9891
MSTRG.11129.3	33.6748	25.9693	17.313	14.9913	31.8616	11.446	Novel transcript variants (BRAKER)	22.5427
MSTRG.1113.1	118.179	154.104	121.169	38.5262	61.8598	31.3978	Novel transcript variants (BRAKER)	87.5394
MSTRG.11131.1	44.4216	77.1065	66.7906	22.3781	32.0908	14.3884	Novel transcript variants (BRAKER)	42.8627
MSTRG.11132.1	103.718	116.85	107.347	49.3708	53.8627	42.3564	Novel transcript variants (BRAKER)	78.9175
MSTRG.11133.1	0	0.12898	0	29.0313	27.9537	50.095	Novel transcript variants (BRAKER)	26.8022
MSTRG.11134.2	0.0887543	0.109047	0	24.3936	32.7234	17.5562	Novel transcript variants (BRAKER)	14.9742
MSTRG.11135.1	11.792	37.012	29.2719	7.25123	10.0299	6.29562	Transcripts from merged genes (BRAKER)	16.9421
MSTRG.11136.1	865.41	650.208	719.966	583.4	279.402	713.95	Novel transcript variants (BRAKER)	635.389
MSTRG.11137.1	26.2543	23.4151	14.9344	17.6035	29.1934	14.5733	Novel transcript variants (BRAKER)	20.9957
MSTRG.11138.1	32.7513	24.8313	17.5828	14.2168	16.8495	14.9824	Novel transcript variants (BRAKER)	20.2023
MSTRG.11139.1	62.1971	69.5556	69.4489	69.6721	67.7018	81.2429	Novel transcript variants (BRAKER)	69.9697
MSTRG.11139.2	95.4374	106.947	106.824	107.035	104.151	124.764	Novel transcript variants (BRAKER)	107.526
MSTRG.1114.1	0.859261	0.673478	0.653368	1.19758	1.54187	1.60596	Transcripts from merged genes (BRAKER)	1.08859
MSTRG.11140.1	187.038	141.32	98.6601	124.41	136.454	147.934	Novel transcript variants (BRAKER)	139.303
MSTRG.11141.1	86.9813	138	188.75	348.854	154.903	657.53	Novel transcript variants (BRAKER)	262.503
MSTRG.11142.1	19.6321	21.1592	17.4482	12.7062	13.7301	12.5709	Novel transcript variants (BRAKER)	16.2078
MSTRG.11143.1	1.64018	2.84046	2.38248	0.451924	0.501562	0.593538	Novel transcript variants (BRAKER)	1.40169
MSTRG.11144.1	0.0608556	0.085451	0.111828	3.38807	2.70479	5.54761	Novel transcript variants (BRAKER)	1.9831
MSTRG.11146.1	0.621429	0.74342	1.23209	4.04935	0.968693	5.17204	Novel transcript variants (BRAKER)	2.13117
MSTRG.11147.1	41.4187	53.0211	40.7736	6.15925	9.19356	6.72271	Transcripts from merged genes (BRAKER)	26.2148
MSTRG.11148.1	0.0537412	0.044019	0.0329182	0.030486	0.148755	0.080078	Novel transcript variants (BRAKER)	0.0649995
MSTRG.11148.2	0.0688611	0.0282018	0.0140599	0.0195316	0.127071	0.0513039	Novel transcript variants (BRAKER)	0.0515049
MSTRG.11148.4	0	0.0273239	0.0272443	0.0378471	0.0615577	0.0745601	Novel transcript variants (BRAKER)	0.0457066
MSTRG.1115.1	155.246	51.113	67.7373	112.684	95.6754	81.2972	Novel transcript variants (BRAKER)	93.9588
MSTRG.11150.1	57.2145	50.1046	41.2942	11.3528	9.97388	14.3661	Novel transcript variants (BRAKER)	30.7177
MSTRG.11151.1	298.377	248.397	158.233	52.3307	51.9567	44.5982	Novel transcript variants (BRAKER)	142.315
MSTRG.11152.1	0.0682726	0	0	33.0554	27.4396	54.3242	Novel transcript variants (BRAKER)	28.7219
MSTRG.11152.3	49.6621	44.7093	34.8676	39.5461	73.6343	28.8545	Novel transcript variants (BRAKER)	45.2123
MSTRG.11154.1	0.0891596	0.0547725	0.0546131	0.151734	0.148076	0.597842	Novel transcript variants (BRAKER)	0.1827
MSTRG.11155.1	0.576176	0.314628	0.0980349	671.54	760.105	786.602	Novel transcript variants (BRAKER)	369.873
MSTRG.11156.1	1.34554	0.615138	2.77923	6.3637	2.06143	9.26703	Novel transcript variants (BRAKER)	3.73868
MSTRG.11157.1	13.2358	6.29148	6.22976	76.2896	35.4792	55.5432	Novel transcript variants (BRAKER)	32.1782
MSTRG.11158.1	0.427923	0.50629	0.854304	0.782193	0.333411	2.12545	Novel transcript variants (BRAKER)	0.838261
MSTRG.11159.1	0	0	0	113.46	125.191	148.361	Novel transcripts (BRAKER)	129.004
MSTRG.1116.1	127.142	116.662	86.0797	32.3278	62.0776	25.7491	Novel transcript variants (BRAKER)	75.0063
MSTRG.11160.1	0.0439627	0.00600159	0	30.2966	53.4401	23.8556	Novel transcript variants (BRAKER)	21.5285
MSTRG.11161.1	0.0253102	0.0248777	0.00310066	29.7422	52.2158	23.6466	Novel transcripts (BRAKER)	17.6097
MSTRG.11163.1	114.488	132.692	101.514	28.173	37.313	24.9386	Transcripts from merged genes (BRAKER)	73.1863
MSTRG.11164.1	2.84014	1.22133	1.15253	9.99912	5.95507	24.8762	Novel transcript variants (BRAKER)	7.67407
MSTRG.11165.1	12.5144	18.9898	17.257	17.5427	29.1015	16.2667	Novel transcript variants (BRAKER)	18.612
MSTRG.11165.2	11.1528	16.9238	15.3795	15.6341	25.9354	14.497	Novel transcript variants (BRAKER)	16.5871
MSTRG.11166.1	0.333945	0.144811	0.409104	3.76091	2.1967	1.4928	Novel transcript variants (BRAKER)	1.38971
MSTRG.11167.1	61.3391	120.8	94.9874	102.836	168.367	78.4683	Novel transcript variants (BRAKER)	104.466
MSTRG.11168.1	6.38176	2.06339	2.12596	13.6806	12.2847	20.3198	Novel transcript variants (BRAKER)	9.47603
MSTRG.11168.2	6.65047	2.11842	2.18083	13.833	12.4582	20.3698	Novel transcript variants (BRAKER)	9.6018
MSTRG.11169.2	0.108478	0	0	1.78456	2.02178	1.69721	Novel transcript variants (BRAKER)	1.40301
MSTRG.11169.3	0	0	0	0.0182983	0.0476191	0.0961288	Novel transcript variants (BRAKER)	0.0540154
MSTRG.1117.1	516.68	445.103	410.307	451.182	496.556	375.41	Novel transcript variants (BRAKER)	449.206
MSTRG.11170.1	80.4403	94.6287	146.692	112.825	46.7027	184.362	Novel transcript variants (BRAKER)	110.942
MSTRG.11170.3	18.1919	16.7635	17.0861	13.4673	17.9935	12.4693	Novel transcript variants (BRAKER)	15.9953
MSTRG.11171.1	157.461	145.563	106.511	144.987	167.438	183.711	Novel transcript variants (BRAKER)	150.945
MSTRG.11172.1	0.253584	0.467345	0.155328	111.233	127.328	126.535	Novel transcript variants (BRAKER)	60.9954
MSTRG.11173.1	1.90855	1.80379	1.64116	76.3284	48.1349	131.953	Novel transcripts (BRAKER)	43.6283
MSTRG.11174.1	61.2334	60.3598	53.7733	77.7575	106.409	52.2837	Novel transcript variants (BRAKER)	68.6361
MSTRG.11175.1	44.1757	78.8619	89.1294	41.7728	22.2515	62.9102	Transcripts from merged genes (BRAKER)	56.5169
MSTRG.11175.2	27.3793	48.8771	55.2406	25.89	13.7911	38.9905	Transcripts from merged genes (BRAKER)	35.0281
MSTRG.11177.1	12.5423	35.5515	32.7284	14.5806	25.2114	10.7132	Novel transcript variants (BRAKER)	21.8879
MSTRG.11178.2	6.91027	12.7354	9.909	6.87511	10.9763	6.07906	Novel transcript variants (BRAKER)	8.91418
MSTRG.11178.3	1.41915	2.6637	2.17742	1.44357	2.30828	1.2915	Novel transcript variants (BRAKER)	1.88394
MSTRG.11179.2	38.4638	79.3127	67.8997	22.6803	31.1132	20.9537	Novel transcript variants (BRAKER)	43.4039
MSTRG.1118.1	263.844	343.962	293.4	182.037	289.02	174.843	Novel transcript variants (BRAKER)	257.851
MSTRG.11180.1	0.158748	0	0.0972379	1.82358	3.33953	2.57242	Novel transcript variants (BRAKER)	1.5983
MSTRG.11181.1	64.2467	96.4344	72.6404	6.31246	7.05138	4.34078	Novel transcript variants (BRAKER)	41.8377
MSTRG.11182.1	28.8056	39.0734	58.7355	58.3165	26.3817	92.9023	Novel transcripts (BRAKER)	50.7025
MSTRG.11182.2	13.177	17.8088	26.9656	25.9926	12.0032	40.3626	Novel transcripts (BRAKER)	22.7183
MSTRG.11183.1	5.73848	6.6789	7.97694	7.52101	3.73496	10.4975	Novel transcript variants (BRAKER)	7.02463
MSTRG.11183.2	4.07211	4.61088	5.56499	5.28568	2.5985	7.30505	Novel transcript variants (BRAKER)	4.9062
MSTRG.11184.1	1.55497	2.28577	2.10563	0.548158	0.593356	0.428233	Novel transcript variants (BRAKER)	1.25269
MSTRG.11185.1	2.79401	3.23554	4.24904	4.6456	5.19142	4.16326	Novel transcript variants (BRAKER)	4.04648
MSTRG.11187.1	28.0492	26.2514	28.3226	6.65913	3.1635	13.3785	Novel transcript variants (BRAKER)	17.6374
MSTRG.11188.1	103.937	159.913	105.929	55.5384	76.1829	62.2151	Novel transcript variants (BRAKER)	93.9527
MSTRG.11189.1	0	0.0459585	0.0916495	0.0954877	0.0414158	0.167213	Novel transcript variants (BRAKER)	0.0883448
MSTRG.1119.1	19.3992	34.3239	29.0205	11.8678	17.9925	11.808	Novel transcript variants (BRAKER)	20.7353
MSTRG.11190.1	5.83348	2.68772	4.03225	0.0861767	0.190624	0.271634	Novel transcripts (BRAKER)	2.18365
MSTRG.11191.1	0.546855	0.335944	0.532005	1.35492	0.94383	3.32531	Transcripts from merged genes (BRAKER)	1.17314
MSTRG.11192.1	75.9469	89.5454	75.7947	50.3276	71.8331	46.8142	Novel transcript variants (BRAKER)	68.377
MSTRG.11194.1	23.1019	15.796	28.9445	13.3547	3.69221	18.5544	Novel transcript variants (BRAKER)	17.2406
MSTRG.11196.1	37.2552	33.4854	25.1802	17.149	26.2928	18.1682	Novel transcript variants (BRAKER)	26.2551
MSTRG.11197.1	0.140138	0.0573932	0.200291	74.6476	42.695	142.987	Transcripts from merged genes (BRAKER)	43.4545
MSTRG.11198.1	44.2108	62.5999	61.4153	21.1462	26.4557	21.3873	Novel transcript variants (BRAKER)	39.5358
MSTRG.11198.2	135.323	191.61	187.984	64.7257	80.9305	65.4637	Novel transcript variants (BRAKER)	121.006
MSTRG.11199.1	862.146	588.071	398.931	107.784	161.404	81.3168	Novel transcript variants (BRAKER)	366.609
MSTRG.112.1	99.5989	70.9052	52.6572	30.6871	40.1126	26.9611	Novel transcript variants (BRAKER)	53.487
MSTRG.1120.1	22.4653	31.5357	28.6789	29.076	46.8994	21	Novel transcript variants (BRAKER)	29.9426
MSTRG.11200.1	0	0.0185111	0.0092286	0.923048	1.21774	0.724007	Novel transcript variants (BRAKER)	0.578507
MSTRG.11200.2	0	0.0325073	0.0162063	1.64348	2.15312	1.27143	Novel transcript variants (BRAKER)	1.02335
MSTRG.11201.1	3.13193	3.13149	2.73869	3.03258	3.03719	2.82421	Novel transcript variants (BRAKER)	2.98268
MSTRG.11202.1	4.31938	8.39663	10.5468	9.46543	4.42208	12.4315	Novel transcripts (BRAKER)	8.26363
MSTRG.11204.1	0	0	0	0	0.0301942	0	Novel transcript variants (BRAKER)	0.0301942
MSTRG.11205.1	128.054	27.8028	35.8808	254.568	341.212	166.112	Novel transcript variants (BRAKER)	158.938
MSTRG.11206.1	0.0480935	0	0	209.159	97.2857	388.59	Novel transcript variants (BRAKER)	173.771
MSTRG.11206.3	0.134972	0	0	35.4119	45.7786	42.7877	Novel transcript variants (BRAKER)	31.0283
MSTRG.11206.4	0.178591	0	0	51.9721	68.8448	61.6051	Novel transcript variants (BRAKER)	45.6501
MSTRG.11207.1	4.53731	5.52707	6.18798	6.11301	3.19348	6.31668	Novel transcript variants (BRAKER)	5.31259
MSTRG.11208.2	0.176439	0.10839	0.0990684	0.988384	0.846529	0.953036	Novel transcript variants (BRAKER)	0.528641
MSTRG.11209.1	1.09287	0.537098	0.446278	1.4259	2.54105	1.95414	Novel transcript variants (BRAKER)	1.33289
MSTRG.11209.2	0.329089	0.161733	0.134385	0.429373	0.765169	0.588438	Novel transcript variants (BRAKER)	0.401364
MSTRG.11209.3	0.327617	0.161009	0.133784	0.427452	0.761745	0.585805	Novel transcript variants (BRAKER)	0.399569
MSTRG.11209.5	0	0	0	0.0185849	0.0241824	0.0488171	Novel transcript variants (BRAKER)	0.0305281
MSTRG.1121.1	0.438082	0	0.345008	2.66264	0.76221	2.0982	Novel transcript variants (BRAKER)	1.26123
MSTRG.11210.1	16.6311	21.2845	23.9414	26.9605	17.4272	40.5469	Novel transcript variants (BRAKER)	24.4653
MSTRG.11211.1	0.022731	0.0837847	0.0139235	68.0842	104.647	61.1833	Novel transcript variants (BRAKER)	39.0059
MSTRG.11212.1	1.0947	0.905815	1.20424	0.608324	0.655498	0.399474	Novel transcript variants (BRAKER)	0.811342
MSTRG.11212.2	1.83056	1.5606	2.01372	1.01724	1.09612	0.667997	Novel transcript variants (BRAKER)	1.36437
MSTRG.11214.1	0	0	0	0	0	0	Novel transcripts (BRAKER)	#DIV/0!
MSTRG.11215.1	5.45469	7.86048	8.38124	7.75675	7.94336	8.53425	Novel transcript variants (BRAKER)	7.65513
MSTRG.11216.1	32.5433	45.4251	42.724	34.9426	26.5595	46.0046	Novel transcript variants (BRAKER)	38.0332
MSTRG.11217.1	1.33132	1.22678	5.30057	217.504	218.709	408.032	Novel transcripts (BRAKER)	142.017
MSTRG.11218.1	0	0	0	2.40413	1.20466	3.27515	Novel transcript variants (BRAKER)	2.29464
MSTRG.11219.1	0.0374778	0	0.0114782	9.05685	11.1934	10.9734	Novel transcripts (BRAKER)	6.25452
MSTRG.1122.1	28.3663	20.6103	19.1734	13.0178	15.3321	15.9722	Novel transcript variants (BRAKER)	18.7454
MSTRG.11220.1	0	0	0	0.0274777	0.0402229	0.0360881	Novel transcript variants (BRAKER)	0.0345962
MSTRG.11221.1	0.0988656	0.0506126	0.0807444	0.953426	1.10376	0.773411	Novel transcript variants (BRAKER)	0.510136
MSTRG.11222.1	44.6131	38.4149	40.4227	15.9839	20.4218	11.4631	Novel transcript variants (BRAKER)	28.5532
MSTRG.11223.1	101.06	134	119.603	5.61313	4.82046	5.60275	Novel transcript variants (BRAKER)	61.7832
MSTRG.11224.1	2.05137	2.10032	2.16402	9.98831	13.8799	9.67946	Novel transcript variants (BRAKER)	6.6439
MSTRG.11224.2	1.03984	1.06466	1.09695	5.06311	7.03579	4.90655	Novel transcript variants (BRAKER)	3.36782
MSTRG.11225.1	115.864	148.705	124.439	40.8652	53.9284	33.855	Novel transcript variants (BRAKER)	86.2761
MSTRG.11227.1	20.0196	27.225	21.3672	15.6814	25.3538	14.8948	Novel transcript variants (BRAKER)	20.757
MSTRG.11228.1	0.0437802	0	0	0.149012	0.218129	0.14678	Novel transcripts (BRAKER)	0.139425
MSTRG.11229.1	116.487	71.7657	59.9652	87.1427	79.4426	119.307	Novel transcript variants (BRAKER)	89.0183
MSTRG.1123.1	476.167	648.149	812.075	417.26	183.148	676.582	Transcripts from merged genes (BRAKER)	535.563
MSTRG.11230.1	8.39616	3.83846	6.81735	10.7166	4.21572	11.4562	Novel transcripts (BRAKER)	7.5734
MSTRG.11231.1	0.0644421	0.118764	0.0592092	130.342	176.11	118.54	Novel transcript variants (BRAKER)	70.8724
MSTRG.11231.2	0.146812	0.270568	0.13489	296.944	401.212	270.058	Novel transcript variants (BRAKER)	161.461
MSTRG.11231.3	0.0612099	0.112807	0.0562395	124.247	168.005	113.074	Novel transcript variants (BRAKER)	67.5927
MSTRG.11232.1	0.160707	0.246814	0.369144	0.7863	0.444836	0.718395	Novel transcripts (BRAKER)	0.454366
MSTRG.11233.1	621.497	626.236	429.476	12.8664	14.0392	12.7734	Novel transcript variants (BRAKER)	286.148
MSTRG.11234.1	9.86159	9.69308	13.6516	38.0967	40.0171	39.8954	Novel transcript variants (BRAKER)	25.2026
MSTRG.11234.2	2.05429	2.09916	2.8904	7.87475	8.2873	8.27389	Novel transcript variants (BRAKER)	5.24663
MSTRG.11235.2	22.6982	28.569	31.391	44.8129	70.1255	29.6342	Transcripts from merged genes (BRAKER)	37.8718
MSTRG.11238.1	0.0224953	0.0276387	0.0275582	0.133991	0.0622669	0.0502794	Transcripts from merged genes (BRAKER)	0.0540382
MSTRG.11238.3	0	0.0294722	0.0440796	0.510284	0.531181	0.402111	Transcripts from merged genes (BRAKER)	0.303426
MSTRG.1124.1	49.8209	47.5032	74.3385	78.3272	32.3653	165.959	Novel transcript variants (BRAKER)	74.719
MSTRG.1124.2	69.2631	66.0712	103.337	108.917	45.0162	230.722	Novel transcript variants (BRAKER)	103.888
MSTRG.11240.1	4.323	8.76853	6.4084	0.326493	0.198253	0.400215	Novel transcript variants (BRAKER)	3.40415
MSTRG.11241.1	0	0.164018	0.245311	0.340779	0.354734	0.0895128	Novel transcripts (BRAKER)	0.238871
MSTRG.11242.1	16.1848	26.1762	25.0368	19.0517	28.6933	10.45	Novel transcript variants (BRAKER)	20.9321
MSTRG.11243.2	19.1987	28.2791	39.3887	145.635	67.2727	292.392	Novel transcript variants (BRAKER)	98.6945
MSTRG.11244.1	16.3555	23.5575	24.3829	20.6401	8.74792	28.0077	Novel transcript variants (BRAKER)	20.2819
MSTRG.11245.1	0.0684321	0	0.0139723	0.213509	0.214675	0.101968	Novel transcript variants (BRAKER)	0.122511
MSTRG.11246.1	33.0379	36.1455	33.9034	0.598135	0.302667	1.65841	Novel transcripts (BRAKER)	17.6077
MSTRG.11247.1	218.65	143.942	110.57	129.89	178.019	118.426	Novel transcript variants (BRAKER)	149.916
MSTRG.11248.1	49.6137	86.9105	154.342	170.227	66.1346	338.725	Novel transcripts (BRAKER)	144.325
MSTRG.11249.1	10.43	4.44542	5.75727	7.58504	10.0822	5.21812	Novel transcript variants (BRAKER)	7.25301
MSTRG.1125.1	81.7157	96.2842	136.846	67.3163	33.9555	121.02	Transcripts from merged genes (BRAKER)	89.5229
MSTRG.11250.2	33.1244	12.4236	10.1235	18.2763	25.9043	15.119	Novel transcript variants (BRAKER)	19.1618
MSTRG.11251.1	151.681	269.791	206.431	89.154	131.435	84.2983	Transcripts from merged genes (BRAKER)	155.465
MSTRG.11251.2	134.41	239.072	182.927	79.0028	116.47	74.6999	Transcripts from merged genes (BRAKER)	137.764
MSTRG.11251.3	146.497	260.572	199.377	86.1522	126.944	81.4176	Transcripts from merged genes (BRAKER)	150.16
MSTRG.11251.7	1.40138	1.46353	1.45927	0.298113	0.0387902	0.469835	Transcripts from merged genes (BRAKER)	0.855153
MSTRG.11252.1	0.169791	0.365071	0.520011	6.89878	8.31864	7.2105	Transcripts from merged genes (BRAKER)	3.9138
MSTRG.11253.1	0.142179	0	0	0.362946	0.131184	0.211857	Novel transcript variants (BRAKER)	0.212041
MSTRG.11254.1	0	0	0	0.350499	0.21203	0.815672	Novel transcripts (BRAKER)	0.4594
MSTRG.11256.1	1.0249	0.415418	0.45304	0.548434	0.403602	0.77933	Novel transcripts (BRAKER)	0.604121
MSTRG.11257.1	1.27788	0.847827	1.67506	7.15483	3.29662	6.71203	Novel transcript variants (BRAKER)	3.49404
MSTRG.11258.2	1.78057	2.4287	3.87276	1.30325	0.7017	0.994941	Transcripts from merged genes (BRAKER)	1.84699
MSTRG.11259.2	0.0312166	0.00958847	0.0191211	0.112891	0.0475239	0.0872152	Transcripts from merged genes (BRAKER)	0.0512593
MSTRG.11260.1	53.6622	55.1107	68.0397	59.4882	45.2413	79.1974	Novel transcript variants (BRAKER)	60.1232
MSTRG.11261.1	81.936	94.9525	90.4844	56.211	72.939	37.7283	Transcripts from merged genes (BRAKER)	72.3752
MSTRG.11262.1	117.423	121.677	103.014	142.194	168.732	160.67	Novel transcript variants (BRAKER)	135.618
MSTRG.11263.1	134.804	160.243	127.959	37.916	69.4997	29.9343	Novel transcript variants (BRAKER)	93.3928
MSTRG.11264.1	6.50335	10.7644	11.5415	6.50794	3.92594	10.0754	Novel transcripts (BRAKER)	8.21976
MSTRG.11265.1	18.027	19.992	12.661	20.6091	33.4549	19.3305	Transcripts from merged genes (BRAKER)	20.6791
MSTRG.11266.1	23.2738	17.4148	13.8308	7.53312	7.39419	9.22146	Novel transcript variants (BRAKER)	13.1114
MSTRG.11266.3	19.1865	38.9157	52.6394	33.929	17.8609	54.4732	Novel transcript variants (BRAKER)	36.1675
MSTRG.11268.1	3.98917	2.70859	4.88699	5.71694	1.39478	5.98324	Novel transcripts (BRAKER)	4.11329
MSTRG.11269.1	0.0996222	0	0.0610217	29.2455	44.3411	35.0699	Novel transcripts (BRAKER)	21.7634
MSTRG.1127.2	2.27558	1.80379	1.57372	77.078	48.8461	183.389	Novel transcript variants (BRAKER)	52.4943
MSTRG.11270.1	156.685	265.535	206.987	275.579	476.64	210.856	Novel transcript variants (BRAKER)	265.38
MSTRG.11271.1	114.39	141.443	97.526	33.0913	40.896	29.9133	Novel transcript variants (BRAKER)	76.2099
MSTRG.11272.1	116.17	170.244	218.577	136.882	59.1053	203.098	Novel transcript variants (BRAKER)	150.679
MSTRG.11273.1	297.771	251.217	182.666	213.255	333.437	213.997	Novel transcript variants (BRAKER)	248.724
MSTRG.11274.2	72.5359	65.7392	84.3058	150.929	86.3918	184.458	Novel transcript variants (BRAKER)	107.393
MSTRG.11275.1	66.8636	76.7455	62.5553	64.5192	103.526	58.4651	Transcripts from merged genes (BRAKER)	72.1125
MSTRG.11275.2	66.8338	76.3183	62.691	65.2328	104.595	59.1663	Transcripts from merged genes (BRAKER)	72.4729
MSTRG.11275.3	55.9452	63.8844	52.4773	54.605	87.5389	49.5269	Transcripts from merged genes (BRAKER)	60.663
MSTRG.11277.2	0	0	0	160.61	89.3172	246.888	Novel transcript variants (BRAKER)	165.605
MSTRG.11277.3	0	0	0	48.0027	26.5347	75.1895	Novel transcript variants (BRAKER)	49.9089
MSTRG.11278.1	25.6743	18.5116	31.8251	110.038	21.937	105.784	Transcripts from merged genes (BRAKER)	52.2949
MSTRG.11279.1	113.261	119.569	108.851	85.814	61.9823	136.499	Novel transcript variants (BRAKER)	104.329
MSTRG.1128.1	1.25974	5.70738	15.5773	5.22564	2.52803	13.6383	Novel transcripts (BRAKER)	7.32273
MSTRG.11280.1	0.100996	0.0827254	0.048116	0.0190975	0.0683361	0.0376228	Novel transcript variants (BRAKER)	0.0594824
MSTRG.11281.1	1.15741	1.44838	1.35882	0.902783	1.1213	1.16172	Transcripts from merged genes (BRAKER)	1.19174
MSTRG.11281.2	3.17591	3.97431	3.72858	2.47722	3.07681	3.18774	Transcripts from merged genes (BRAKER)	3.27009
MSTRG.11282.1	41.1152	71.1982	54.299	16.4007	25.5055	14.3694	Novel transcript variants (BRAKER)	37.148
MSTRG.11283.1	74.0134	46.86	51.3331	78.4779	47.7671	106.94	Novel transcript variants (BRAKER)	67.5652
MSTRG.11284.1	14.3611	8.98847	12.3784	9.81986	5.09103	12.2205	Novel transcript variants (BRAKER)	10.4766
MSTRG.11285.1	6.00242	5.02909	5.35111	3.50758	5.80512	2.05281	Novel transcript variants (BRAKER)	4.62469
MSTRG.11286.1	8.79057	2.62843	5.64658	1.98584	1.44271	2.69505	Novel transcript variants (BRAKER)	3.86486
MSTRG.11287.1	0	0	0.0551164	0.382831	0.249067	0.603352	Novel transcripts (BRAKER)	0.322592
MSTRG.11289.2	0	0	0	0	0.01449	0.0146255	Novel transcript variants (BRAKER)	0.0145577
MSTRG.1129.1	77.8469	66.2365	46.2673	15.7768	22.188	15.5524	Novel transcript variants (BRAKER)	40.6447
MSTRG.1129.2	20.6485	17.5679	12.252	4.23573	5.88184	4.13108	Novel transcript variants (BRAKER)	10.7862
MSTRG.1129.4	4.49638	6.31729	4.62217	1.6296	2.24142	1.46561	Novel transcript variants (BRAKER)	3.46208
MSTRG.11290.1	0	0	0	0.167264	0.133003	0.17086	Novel transcript variants (BRAKER)	0.157042
MSTRG.11291.1	99.8486	85.2469	63.7396	17.2823	21.7162	13.3211	Novel transcript variants (BRAKER)	50.1925
MSTRG.11293.2	0.813582	1.62435	2.6786	78.4879	34.9621	112.288	Novel transcript variants (BRAKER)	38.4758
MSTRG.11294.1	18.771	41.1994	55.8624	96.8535	69.498	116.787	Novel transcript variants (BRAKER)	66.4953
MSTRG.11295.1	1.14113	0.841221	0.683444	3.81926	6.28918	3.40071	Novel transcript variants (BRAKER)	2.69582
MSTRG.11296.1	0.265167	0.385031	0.265784	1.76405	2.62898	1.61639	Novel transcripts (BRAKER)	1.15423
MSTRG.11297.1	31.3064	40.6331	36.0353	23.6961	27.6421	22.8278	Novel transcript variants (BRAKER)	30.3568
MSTRG.11297.3	32.5433	68.6783	67.6576	39.7453	57.1209	33.3737	Novel transcript variants (BRAKER)	49.8532
MSTRG.11298.1	550.017	365.869	323.845	270.64	229.073	236.775	Novel transcript variants (BRAKER)	329.37
MSTRG.11298.3	13.4967	19.437	18.635	9.31938	11.0545	9.30339	Novel transcript variants (BRAKER)	13.541
MSTRG.11299.1	120.41	136.003	119.892	97.2812	139.976	80.0639	Transcripts from merged genes (BRAKER)	115.604
MSTRG.113.1	439.459	779.533	593.106	687.813	680.584	1130.79	Novel transcript variants (BRAKER)	718.547
MSTRG.1130.1	32.1551	20.0287	25.2921	36.4307	52.2626	29.9291	Novel transcript variants (BRAKER)	32.6831
MSTRG.11300.2	17.2463	53.2781	64.4761	29.7718	34.596	29.3534	Novel transcript variants (BRAKER)	38.1203
MSTRG.11301.1	0.0342561	0.0420884	0.0209829	169.501	81.4507	342.9	Novel transcripts (BRAKER)	98.9914
MSTRG.11302.1	5.44339	4.01278	4.10865	4.96055	4.58822	2.98276	Novel transcript variants (BRAKER)	4.34939
MSTRG.11304.1	0	0	0.112833	46.9448	28.9104	133.81	Novel transcript variants (BRAKER)	52.4444
MSTRG.11305.1	0	0	0	0.593388	0.165452	0.612331	Novel transcripts (BRAKER)	0.457057
MSTRG.11306.1	0	0	0	0.174631	0.0811526	0.131059	Novel transcripts (BRAKER)	0.128947
MSTRG.11307.2	0.183515	0.180379	0.0674451	0.218617	0.0812746	0.246104	Novel transcript variants (BRAKER)	0.162889
MSTRG.11308.1	1.67114	1.40484	1.61625	4.34082	4.0414	1.671	Novel transcript variants (BRAKER)	2.45757
MSTRG.11309.2	0.0813582	0	0.0249172	0	0	0	Novel transcript variants (BRAKER)	0.0531377
MSTRG.1131.1	0.0540885	0.0664553	0.0331309	0.20711	0.104802	0.0604467	Novel transcripts (BRAKER)	0.0876722
MSTRG.11310.1	22.0481	8.76315	14.3855	7.73052	10.9597	6.81914	Novel transcript variants (BRAKER)	11.7843
MSTRG.11310.2	20.5098	8.15176	13.3664	7.19119	10.1811	6.34338	Novel transcript variants (BRAKER)	10.9573
MSTRG.11311.1	0.038742	0	0	0	0.0214475	0	Novel transcripts (BRAKER)	0.0300947
MSTRG.11312.1	0.488149	0.499799	0.822268	0.761514	0.0900794	0.590992	Novel transcript variants (BRAKER)	0.542134
MSTRG.11315.1	1.16534	0.429536	0.856571	6.84206	5.33308	7.64033	Novel transcript variants (BRAKER)	3.71115
MSTRG.11315.3	0.0935749	0	0	113.331	167.271	163.52	Novel transcript variants (BRAKER)	111.054
MSTRG.11315.4	0.185373	0	0	224.406	331.298	323.866	Novel transcript variants (BRAKER)	219.939
MSTRG.11316.1	0.139187	0.171011	0.073077	0.203033	0.275192	0.288876	Novel transcript variants (BRAKER)	0.191729
MSTRG.11317.1	0.0179137	0	0.0109727	0.503019	0.436348	0.900877	Novel transcript variants (BRAKER)	0.373826
MSTRG.11318.1	21.2118	29.8025	25.3077	49.4164	44.9793	66.7854	Transcripts from merged genes (BRAKER)	39.5838
MSTRG.11318.2	24.6963	34.566	29.3345	57.046	52.0808	76.9231	Transcripts from merged genes (BRAKER)	45.7744
MSTRG.11319.1	0.0625832	0.0768922	0	0.0266264	0.017323	0	Novel transcripts (BRAKER)	0.0458562
MSTRG.1132.1	101.992	113.869	136.907	142.611	66.1796	224.712	Novel transcript variants (BRAKER)	131.045
MSTRG.11320.1	0.113523	0.139479	0	389.161	353.195	501.593	Novel transcripts (BRAKER)	248.84
MSTRG.11320.2	0.0932769	0.114604	0	319.757	290.205	412.137	Novel transcripts (BRAKER)	204.461
MSTRG.11321.1	0.681138	0.325451	0.486755	1.64217	2.26246	0.718917	Novel transcript variants (BRAKER)	1.01948
MSTRG.11322.1	508.163	382.946	446.467	505.438	227.315	631.816	Novel transcript variants (BRAKER)	450.357
MSTRG.11324.1	247.569	240.282	216.556	207.283	115.139	277.98	Novel transcript variants (BRAKER)	217.468
MSTRG.11325.1	57.4726	74.1891	62.5996	34.6091	47.9902	38.2078	Novel transcript variants (BRAKER)	52.5114
MSTRG.11326.1	18.4514	14.5225	10.1926	8.25518	10.5886	6.99927	Novel transcript variants (BRAKER)	11.5016
MSTRG.11327.1	59.5731	70.0204	45.9251	26.7572	47.9082	28.5212	Novel transcript variants (BRAKER)	46.4509
MSTRG.11328.1	2.03267	4.08669	4.94257	0.707573	0.528542	1.06697	Novel transcript variants (BRAKER)	2.2275
MSTRG.11329.1	0.156961	0.192849	0.115372	0.13356	0.104272	0.245577	Novel transcripts (BRAKER)	0.158098
MSTRG.1133.1	145.934	243.169	208.24	66.155	88.2306	61.0081	Transcripts from merged genes (BRAKER)	135.456
MSTRG.11330.1	40.858	33.8553	26.8916	37.4186	53.3049	24.3125	Transcripts from merged genes (BRAKER)	36.1068
MSTRG.11330.2	42.1074	34.8799	27.5291	38.2783	54.6501	25.0254	Transcripts from merged genes (BRAKER)	37.0784
MSTRG.11331.1	0.0326521	0.120353	0.0200004	0.222272	0.0903807	0.145961	Novel transcripts (BRAKER)	0.10527
MSTRG.11332.1	0	0	0.0343686	41.8236	29.136	70.3547	Novel transcripts (BRAKER)	35.3372
MSTRG.11334.1	0	0	0	0.386392	0.16759	0.479278	Novel transcripts (BRAKER)	0.34442
MSTRG.11335.1	120.623	124.573	124.161	85.6165	69.0363	82.0085	Transcripts from merged genes (BRAKER)	101.003
MSTRG.11336.1	152.077	122.874	94.3787	69.5481	104.146	60.1483	Transcripts from merged genes (BRAKER)	100.529
MSTRG.11336.3	55.0523	51.1461	55.4823	32.999	49.5437	21.9728	Transcripts from merged genes (BRAKER)	44.366
MSTRG.11337.1	88.0601	168.883	161.108	13.736	18.9969	9.83036	Novel transcript variants (BRAKER)	76.7691
MSTRG.11338.1	114.118	206.02	168.455	18.8235	29.6854	19.3161	Novel transcript variants (BRAKER)	92.7363
MSTRG.11338.2	198.11	357.654	292.441	32.6778	51.5342	33.533	Novel transcript variants (BRAKER)	160.992
MSTRG.11338.3	390.834	702.685	573.385	63.2437	99.436	63.352	Novel transcript variants (BRAKER)	315.489
MSTRG.1134.1	74.7768	97.5697	172.655	264.121	91.2167	536.022	Novel transcript variants (BRAKER)	206.06
MSTRG.11340.1	0.527729	0.324194	0.1293	0.134715	0.11686	0.176929	Novel transcript variants (BRAKER)	0.234954
MSTRG.11341.1	0.200413	0.070353	0.0438426	0.146172	0.0396244	0.143982	Novel transcripts (BRAKER)	0.107398
MSTRG.11342.2	0.366621	0.650643	0.349326	0.623924	0.653984	0.318669	Novel transcript variants (BRAKER)	0.493861
MSTRG.11342.3	0.30939	0.549075	0.294795	0.526527	0.494802	0.268924	Novel transcript variants (BRAKER)	0.407252
MSTRG.11342.4	2.39637	1.52666	0.761108	9.36474	13.168	8.13337	Novel transcript variants (BRAKER)	5.8917
MSTRG.11343.1	0	0	0	0.132919	0.0172952	0.139656	Novel transcripts (BRAKER)	0.0966234
MSTRG.11344.1	0	0.0382012	0.019045	0.0529136	0.00860631	0	Novel transcripts (BRAKER)	0.0296915
MSTRG.11345.1	0.0194482	0.0238948	0.0357378	0.049646	0.0215329	0	Novel transcript variants (BRAKER)	0.0300519
MSTRG.11345.2	0.0314935	0.0386941	0.0578722	0.0803945	0.0348694	0	Novel transcript variants (BRAKER)	0.0486648
MSTRG.11346.1	11.1377	15.5799	12.6133	7.18545	8.55754	7.46186	Novel transcript variants (BRAKER)	10.4226
MSTRG.11348.2	0.0175278	0	0	40.1501	20.2703	82.7993	Novel transcript variants (BRAKER)	35.8093
MSTRG.11349.1	44.4986	35.733	37.187	27.8518	11.2789	37.6416	Novel transcripts (BRAKER)	32.3651
MSTRG.11349.2	130.148	104.543	108.792	81.4128	33.0106	110.029	Novel transcripts (BRAKER)	94.656
MSTRG.1135.1	0.299631	0.33746	0.290595	0.0424932	0.0276458	0	Novel transcripts (BRAKER)	0.199565
MSTRG.11350.1	38.8363	42.0777	64.5364	22.5113	10.1787	46.2239	Novel transcript variants (BRAKER)	37.394
MSTRG.11351.1	4.79298	9.18459	6.04686	12.8956	14.7368	11.8541	Novel transcript variants (BRAKER)	9.9185
MSTRG.11352.2	25.4055	39.6225	26.1246	17.1117	30.7974	17.9062	Novel transcript variants (BRAKER)	26.1613
MSTRG.11353.1	0.288383	0.420754	0.585133	2.91399	3.71183	3.68611	Novel transcript variants (BRAKER)	1.93437
MSTRG.11354.1	1.16864	0.269219	0.268435	0	0	0	Novel transcripts (BRAKER)	0.568763
MSTRG.11355.1	0.0245301	0	0	0	0.0135798	0	Novel transcripts (BRAKER)	0.019055
MSTRG.11356.1	26.0116	30.8992	30.5557	47.3788	87.6794	35.2378	Novel transcript variants (BRAKER)	42.9604
MSTRG.11358.1	7.22082	3.43906	3.11845	1.57059	1.52711	1.92674	Novel transcripts (BRAKER)	3.13379
MSTRG.11359.1	0.172491	0.296701	0.559977	0.190807	0.171883	0.289151	Novel transcript variants (BRAKER)	0.280168
MSTRG.11359.3	0.564334	0.624027	1.69379	0.624258	0.499862	0.946008	Novel transcript variants (BRAKER)	0.825381
MSTRG.1136.1	33.5122	27.9663	23.047	13.2079	7.53023	17.0402	Novel transcript variants (BRAKER)	20.384
MSTRG.11360.1	5.54252	1.53064	2.22698	1.73071	1.78751	0.937632	Novel transcript variants (BRAKER)	2.29267
MSTRG.11360.2	1.38563	0.382659	0.556744	0.432679	0.446878	0.234408	Novel transcript variants (BRAKER)	0.573166
MSTRG.11361.1	52.8238	90.6013	80.1684	62.4061	57.22	88.55	Transcripts from merged genes (BRAKER)	71.9616
MSTRG.11361.2	38.9479	66.7299	59.0259	46.0524	42.1629	65.173	Transcripts from merged genes (BRAKER)	53.0153
MSTRG.11362.1	283.756	216.19	186.624	69.9432	52.9766	66.2682	Novel transcript variants (BRAKER)	145.96
MSTRG.11363.1	0.131577	0.032332	0.0967137	0.246312	0.582724	2.47033	Novel transcript variants (BRAKER)	0.593331
MSTRG.11364.1	0.0349928	0	0	0.0446636	0.0387438	0.0391062	Novel transcript variants (BRAKER)	0.0393766
MSTRG.11364.2	0.0473931	0	0	0.0806547	0.0918285	0.0794463	Novel transcript variants (BRAKER)	0.0748306
MSTRG.11365.1	0.394375	0.484545	0.209358	0.492182	0.37843	0.411352	Novel transcripts (BRAKER)	0.39504
MSTRG.11365.2	0.384033	0.440383	0.203868	0.479275	0.325987	0.343341	Novel transcripts (BRAKER)	0.362814
MSTRG.11366.1	0	0	0	125.76	48.9065	266.024	Novel transcripts (BRAKER)	146.897
MSTRG.11367.2	2.90565	1.8564	1.24586	2.2252	1.19033	2.14316	Novel transcript variants (BRAKER)	1.92777
MSTRG.11368.1	0.496885	0.550115	0.715743	0.469268	0.332508	1.03736	Novel transcript variants (BRAKER)	0.600314
MSTRG.11369.1	0.0346888	0.0142067	0.0259698	0.426358	0.454487	0.417817	Transcripts from merged genes (BRAKER)	0.228921
MSTRG.11369.2	0.0345796	0.014162	0.025888	0.395592	0.427531	0.369269	Transcripts from merged genes (BRAKER)	0.21117
MSTRG.11369.3	0.0892049	0.0365335	0.0667832	1.09641	1.16875	1.07445	Transcripts from merged genes (BRAKER)	0.588688
MSTRG.1137.1	77.7777	33.4562	55.9229	53.1618	41.4329	50.8437	Novel transcript variants (BRAKER)	52.0992
MSTRG.11371.1	70.6471	114.474	92.692	91.4798	131.353	91.2368	Novel transcript variants (BRAKER)	98.647
MSTRG.11371.2	104.938	170.037	137.683	135.882	195.109	135.521	Novel transcript variants (BRAKER)	146.528
MSTRG.11372.1	0.830892	0.714607	1.06879	0.600963	0.275988	2.27498	Novel transcript variants (BRAKER)	0.961037
MSTRG.11373.1	133.091	96.3751	114.447	997.178	474.439	2107.51	Novel transcripts (BRAKER)	653.839
MSTRG.11374.1	61.6424	109.407	89.1327	43.9026	83.6997	34.9776	Novel transcript variants (BRAKER)	70.4603
MSTRG.11375.1	71.9543	69.344	47.3639	13.2651	27.1706	11.17	Novel transcript variants (BRAKER)	40.0446
MSTRG.11375.2	106.619	102.751	70.1819	19.6557	40.2808	16.5512	Novel transcript variants (BRAKER)	59.34
MSTRG.11375.3	47.028	45.3262	30.9454	8.66682	17.7791	7.29795	Novel transcript variants (BRAKER)	26.1739
MSTRG.11375.4	38.8773	37.4705	25.5821	7.16473	14.7051	6.03311	Novel transcript variants (BRAKER)	21.6388
MSTRG.11376.1	2.70863	4.02277	3.71935	4.17904	7.43155	2.1289	Novel transcripts (BRAKER)	4.03171
MSTRG.11377.1	11.5002	13.4039	11.5346	13.0672	22.8885	11.2601	Novel transcript variants (BRAKER)	13.9424
MSTRG.11378.1	0	0.0533119	0.132892	0.849204	0.384339	1.35777	Novel transcript variants (BRAKER)	0.555503
MSTRG.11379.1	0.101849	0.143013	0.115859	0.284755	0.515506	0.325205	Novel transcript variants (BRAKER)	0.247698
MSTRG.11379.3	0.236474	0.332047	0.269002	0.661145	1.1969	0.717307	Novel transcript variants (BRAKER)	0.568813
MSTRG.11379.4	0.240637	0.337892	0.273738	0.672785	1.21797	0.768354	Novel transcript variants (BRAKER)	0.58523
MSTRG.1138.1	2.3551	3.5249	3.59332	0.546541	0.900794	0.430682	Novel transcripts (BRAKER)	1.89189
MSTRG.11380.1	0	0.0141453	0	0.78372	0.943284	0.990705	Novel transcript variants (BRAKER)	0.682964
MSTRG.11381.1	0	0	0	0.0346866	0.0112834	0.0227779	Novel transcripts (BRAKER)	0.022916
MSTRG.11382.1	0.121029	0.0991337	0.148268	1.61343	0.424341	1.35256	Novel transcripts (BRAKER)	0.626459
MSTRG.11383.1	0.725459	1.06478	1.68259	1.50321	0.575283	3.3306	Novel transcript variants (BRAKER)	1.48032
MSTRG.11383.2	1.22285	1.79481	2.83621	2.53385	0.96971	5.61413	Novel transcript variants (BRAKER)	2.49526
MSTRG.11384.1	6.85486	8.23074	12.3738	33.7452	13.2436	64.6125	Novel transcript variants (BRAKER)	23.1768
MSTRG.11386.1	11.5064	14.4585	11.8535	10.9035	3.18495	20.4574	Novel transcripts (BRAKER)	12.0607
MSTRG.11387.1	0.200514	0.0934469	0.0719987	0.464792	0.486122	0.169996	Novel transcript variants (BRAKER)	0.247812
MSTRG.11388.1	55.5646	53.46	49.6129	59.4511	58.4738	79.5173	Novel transcript variants (BRAKER)	59.3466
MSTRG.11388.3	201.824	173.103	144.864	205.537	230.634	266.182	Novel transcript variants (BRAKER)	203.691
MSTRG.11389.1	269.988	151.642	129.957	448.636	235.234	743.771	Novel transcript variants (BRAKER)	329.871
MSTRG.1139.1	0.827371	1.39411	1.02806	0.764364	0.57581	0.660449	Novel transcript variants (BRAKER)	0.875028
MSTRG.11390.1	0.250333	0.307569	0.102224	0.816542	0.50814	0.792652	Novel transcripts (BRAKER)	0.46291
MSTRG.11391.1	0.0745266	0	0.0912997	0.253662	0.123773	0.166574	Novel transcripts (BRAKER)	0.141967
MSTRG.11392.1	5.92752	2.3562	3.15025	9.86507	6.3699	17.2427	Novel transcripts (BRAKER)	7.48527
MSTRG.11393.1	17.149	15.5852	16.4489	11.9481	5.90544	18.9446	Novel transcript variants (BRAKER)	14.3302
MSTRG.11395.2	91.2456	71.1575	58.8029	83.2477	87.811	90.3969	Novel transcript variants (BRAKER)	80.4436
MSTRG.11396.1	0.110943	0	0.045304	0.0944026	0	0.0413281	Novel transcripts (BRAKER)	0.0729944
MSTRG.11397.1	35.9963	55.3976	43.6869	24.3515	25.3735	21.9045	Novel transcript variants (BRAKER)	34.4517
MSTRG.11399.2	0	0	0	0.0210581	0.0411009	0.0138284	Novel transcript variants (BRAKER)	0.0253291
MSTRG.114.1	0	0	0	2.62982	3.56352	3.78555	Novel transcript variants (BRAKER)	3.32629
MSTRG.1140.1	83.087	114.704	86.9611	17.4802	25.5037	13.7519	Novel transcript variants (BRAKER)	56.9146
MSTRG.1140.2	60.8454	79.5551	62.3477	13.2383	19.0387	10.9106	Novel transcript variants (BRAKER)	40.9893
MSTRG.11400.1	0	0.369083	0.092002	0.639033	0.914652	0.335711	Novel transcript variants (BRAKER)	0.470096
MSTRG.11400.2	0.0241658	0.0593821	0.118418	0.308444	0.561881	0.324078	Novel transcript variants (BRAKER)	0.232728
MSTRG.11401.1	52.3557	78.4333	74.3095	32.1182	43.0859	29.3511	Novel transcript variants (BRAKER)	51.6089
MSTRG.11402.1	0.283572	0.248863	0.372207	0.758355	0.336396	0.0905446	Novel transcript variants (BRAKER)	0.348323
MSTRG.11403.1	31.0874	9.25944	22.137	48.1685	13.5593	47.5665	Novel transcript variants (BRAKER)	28.6297
MSTRG.11404.1	0.0241061	0.0296177	0	34.1938	50.5646	29.3374	Novel transcript variants (BRAKER)	22.8299
MSTRG.11406.1	2.52609	1.25824	4.07736	4.12467	0.604729	5.9894	Novel transcripts (BRAKER)	3.09675
MSTRG.11407.1	482.408	637.952	655.016	323.857	181.708	649.357	Novel transcript variants (BRAKER)	488.383
MSTRG.11409.1	0	0	0	1.38684	1.80454	1.74999	Novel transcripts (BRAKER)	1.64712
MSTRG.1141.1	18.9885	6.82295	13.3867	11.2036	11.107	13.2129	Transcripts from merged genes (BRAKER)	12.4536
MSTRG.11410.1	0.0619872	0.0380799	0	86.2654	113.775	111.011	Novel transcript variants (BRAKER)	62.2303
MSTRG.11411.1	7.36966	2.94052	4.05827	5.054	4.78269	2.70727	Novel transcript variants (BRAKER)	4.4854
MSTRG.11412.1	3.96818	5.80412	6.59744	0.750348	0.278956	0.915084	Novel transcript variants (BRAKER)	3.05235
MSTRG.11413.1	16.1129	34.4577	32.4288	0.27016	0.263647	0.325249	Novel transcripts (BRAKER)	13.9764
MSTRG.11414.1	7.90973	12.1126	12.4401	7.16943	9.32877	6.61897	Novel transcript variants (BRAKER)	9.26325
MSTRG.11414.2	42.9986	65.8459	67.6264	38.9742	50.7128	35.9818	Novel transcript variants (BRAKER)	50.3566
MSTRG.11415.1	0.0650865	0.559775	0.558146	0.276914	0.288254	0.436425	Novel transcript variants (BRAKER)	0.3641
MSTRG.11415.2	2.4688	3.30902	2.9557	2.19622	1.55309	2.13196	Novel transcript variants (BRAKER)	2.4358
MSTRG.11416.1	0.414055	0.2142	0.373758	7.65841	4.16215	14.1741	Novel transcripts (BRAKER)	4.49944
MSTRG.11417.2	0.0527729	0.0324194	0.032325	0.17962	0.233719	0.353858	Novel transcript variants (BRAKER)	0.147452
MSTRG.11418.1	0	0.11424	0.0854304	1.81972	0.411791	1.35084	Novel transcripts (BRAKER)	0.756405
MSTRG.11419.1	1.72288	2.205	6.50779	0.183252	0.0794818	0.401126	Novel transcripts (BRAKER)	1.84992
MSTRG.1142.1	2.84014	1.30857	2.17459	3.7761	4.56948	4.26506	Novel transcript variants (BRAKER)	3.15566
MSTRG.11420.1	0	0	0	0	0	0.0416436	Novel transcripts (BRAKER)	0.0416436
MSTRG.11421.1	22.6028	6.90632	27.4361	8.30743	1.53954	6.0835	Novel transcripts (BRAKER)	12.1459
MSTRG.11421.2	4.53056	1.39524	5.55022	1.69101	0.314332	1.25587	Novel transcripts (BRAKER)	2.4562
MSTRG.11422.1	0.747229	0.602017	0.765337	0.437782	0.542511	0.287482	Novel transcripts (BRAKER)	0.563726
MSTRG.11423.1	0.262681	0.14344	0.241351	0.285607	0.169656	0.391412	Novel transcripts (BRAKER)	0.249025
MSTRG.11424.1	0	0.032332	0.0644758	0	0	0	Novel transcripts (BRAKER)	0.0484039
MSTRG.11425.1	19.9884	23.0118	35.8965	45.9313	17.6366	75.8288	Novel transcript variants (BRAKER)	36.3822
MSTRG.11426.1	7.81038	3.87273	4.35695	48.278	30.3284	74.0364	Novel transcript variants (BRAKER)	28.1138
MSTRG.11426.2	10.6367	5.27415	5.93359	65.7483	41.3033	100.828	Novel transcript variants (BRAKER)	38.2873
MSTRG.11427.1	10.7538	4.65485	5.78377	14.259	8.19588	13.7116	Novel transcript variants (BRAKER)	9.55982
MSTRG.11428.1	0.077484	0.0951999	0.142384	0	0.300265	0	Novel transcript variants (BRAKER)	0.153833
MSTRG.11429.1	0	0	0	0.347176	0.0806681	0.227983	Novel transcripts (BRAKER)	0.218609
MSTRG.11430.1	1.00501	0.294	0.205201	1276.7	2044.91	1192.36	Novel transcript variants (BRAKER)	752.578
MSTRG.11431.1	0.205105	0.0503999	0.0753798	0.104715	0.113545	0.366744	Novel transcript variants (BRAKER)	0.152648
MSTRG.11433.1	43.3277	46.6966	31.8067	39.4957	49.5108	39.8198	Novel transcript variants (BRAKER)	41.7762
MSTRG.11434.1	5.08395	1.60304	1.22634	1.0145	0.971363	0.75419	Transcripts from merged genes (BRAKER)	1.77556
MSTRG.11435.1	0.0938748	0	0.0575013	7.90803	5.30083	9.02224	Novel transcripts (BRAKER)	4.4765
MSTRG.11437.1	0.0141835	0	0.00868784	0.0965512	0.0549637	0.110955	Novel transcripts (BRAKER)	0.0570683
MSTRG.11438.1	14.9634	14.5871	12.4411	26.8635	31.1317	26.8379	Novel transcript variants (BRAKER)	21.1374
MSTRG.11438.2	15.3814	14.9824	12.7859	27.5914	31.9753	27.5652	Novel transcript variants (BRAKER)	21.7136
MSTRG.1144.1	2.57674	2.11059	3.13036	2.81381	2.32991	1.53581	Novel transcript variants (BRAKER)	2.4162
MSTRG.11440.2	0.0401769	0.0246814	0	0.0512804	0.0222418	0	Novel transcript variants (BRAKER)	0.0345951
MSTRG.11442.1	5.73006	11.7917	7.74773	7.0193	15.0161	5.03567	Novel transcript variants (BRAKER)	8.72344
MSTRG.11443.1	2.37578	2.46289	1.86453	2.62174	4.08954	3.02842	Novel transcript variants (BRAKER)	2.74048
MSTRG.11443.2	0.419012	0.257407	0.179661	0.42785	0.32475	1.12384	Novel transcript variants (BRAKER)	0.45542
MSTRG.11444.1	0	0	0.126341	10.8816	8.22133	14.2914	Novel transcripts (BRAKER)	8.38015
MSTRG.11445.1	0.0495874	0.0821164	0.083198	0.407269	0.169483	0.356593	Novel transcript variants (BRAKER)	0.191374
MSTRG.11446.1	0.0240037	0.0160865	0.0253962	0.0575615	0.0157045	0.0585281	Novel transcript variants (BRAKER)	0.0328801
MSTRG.11447.1	0.29735	0.548003	0.60712	1.09641	0.356659	1.16306	Novel transcript variants (BRAKER)	0.678101
MSTRG.11447.2	2.07093	2.84734	2.08399	24.8803	23.3115	37.6912	Novel transcript variants (BRAKER)	15.4809
MSTRG.11448.1	26.3239	36.341	42.8355	75.1976	44.8796	111.935	Novel transcript variants (BRAKER)	56.2521
MSTRG.11448.2	29.4503	40.8431	47.8411	84.0355	50.2956	125.157	Novel transcript variants (BRAKER)	62.937
MSTRG.11449.1	0	0.1666	0.0415287	0.980738	0.713128	3.3338	Novel transcripts (BRAKER)	1.04716
MSTRG.1145.1	92.9993	80.8818	48.7637	35.7932	52.0401	33.3553	Novel transcript variants (BRAKER)	57.3056
MSTRG.11450.1	0.069241	0.0850722	0.0424123	164.44	245.476	165.052	Novel transcript variants (BRAKER)	95.8608
MSTRG.11450.2	0.116226	0.1428	0.071192	276.024	412.049	277.052	Novel transcript variants (BRAKER)	160.909
MSTRG.11451.1	0	0	0	0.47471	0.463265	0.701397	Novel transcripts (BRAKER)	0.546458
MSTRG.11452.1	0.105736	0.129912	0.107945	0.359889	0.263409	0.256025	Novel transcript variants (BRAKER)	0.203819
MSTRG.11453.1	0.0351439	0.164081	0.206657	0.759571	1.03115	0.793357	Transcripts from merged genes (BRAKER)	0.498326
MSTRG.11454.1	0.034547	0.0764024	0.131199	0.699635	0.263927	0.810768	Novel transcripts (BRAKER)	0.33608
MSTRG.11455.1	0.0142421	0.00874922	0	11.5795	6.26811	24.4156	Novel transcripts (BRAKER)	8.45724
MSTRG.11456.1	1.07298	0.941651	1.63226	4.23398	2.02352	9.22396	Novel transcript variants (BRAKER)	3.18806
MSTRG.11458.1	4.7766	2.55765	2.99501	3.51521	3.9754	2.39853	Novel transcript variants (BRAKER)	3.36973
MSTRG.11458.2	1.67819	0.898594	1.05573	1.23502	1.3967	0.84269	Novel transcript variants (BRAKER)	1.18449
MSTRG.11459.1	3.28621	7.16945	5.6458	8.0776	6.91872	11.703	Novel transcript variants (BRAKER)	7.13346
MSTRG.1146.1	192.975	172.441	231.529	238.146	106.37	414.062	Novel transcript variants (BRAKER)	225.921
MSTRG.11460.2	3.13964	8.52873	6.91798	1.04666	1.65238	0.528709	Novel transcript variants (BRAKER)	3.63568
MSTRG.11461.1	0.00960923	0	0.0117719	0.0327064	0	0.053694	Novel transcripts (BRAKER)	0.0269454
MSTRG.11462.1	51.4747	60.1681	50.1986	22.8454	22.6584	21.9611	Transcripts from merged genes (BRAKER)	38.2177
MSTRG.11463.1	1.61923	1.28729	1.34188	15.2776	10.4404	19.9585	Novel transcript variants (BRAKER)	8.32081
MSTRG.11463.2	0.203154	0.156893	0.163547	1.87683	1.27889	2.43251	Novel transcript variants (BRAKER)	1.01864
MSTRG.11464.1	0	0	0	0.00494196	0	0.00649055	Novel transcript variants (BRAKER)	0.00571626
MSTRG.11465.1	0	0	0.0181767	11.0008	4.21101	15.7303	Novel transcript variants (BRAKER)	7.74008
MSTRG.11466.1	0.0986159	0.0969308	0.126851	0.469915	0.0982684	0.319604	Novel transcript variants (BRAKER)	0.201698
MSTRG.11468.2	0.139721	0.0214583	0.171167	0.609311	0.338402	1.11253	Transcripts from merged genes (BRAKER)	0.398765
MSTRG.11469.1	24.1821	12.8256	11.0402	4.85665	5.98681	5.62317	Novel transcripts (BRAKER)	10.7524
MSTRG.1147.1	0.151756	0.0932268	0.139433	0.0516524	0.0756107	0.271352	Transcripts from merged genes (BRAKER)	0.130505
MSTRG.1147.4	0.0500452	0.0614875	0.0383178	0.010646	0.00692622	0.083892	Transcripts from merged genes (BRAKER)	0.0418858
MSTRG.11470.1	125.834	209.725	153.11	29.8013	35.946	24.5922	Novel transcript variants (BRAKER)	96.5015
MSTRG.11471.1	25.7161	57.4237	40.7667	12.9384	18.7672	9.42492	Novel transcript variants (BRAKER)	27.5062
MSTRG.11472.1	11.2211	9.46373	5.3394	6.23057	11.6694	4.07377	Novel transcript variants (BRAKER)	7.99966
MSTRG.11472.3	6.78444	7.89513	6.82478	6.12497	12.092	3.79098	Novel transcript variants (BRAKER)	7.25205
MSTRG.11473.1	0.388447	0.286357	0.269661	0.198321	0.22938	0.173644	Novel transcripts (BRAKER)	0.257635
MSTRG.11474.2	0.494328	0.24294	0.34821	0.126189	0.109464	0.165731	Novel transcript variants (BRAKER)	0.24781
MSTRG.11474.3	3.98968	4.70003	3.33507	3.69441	4.53428	4.72094	Novel transcript variants (BRAKER)	4.1624
MSTRG.11474.4	13.8309	17.1042	10.6867	13.6919	16.4645	15.9618	Novel transcript variants (BRAKER)	14.6233
MSTRG.11475.1	0	0.272618	0	0.566416	0.982684	1.36383	Novel transcript variants (BRAKER)	0.796386
MSTRG.11476.1	0.0996222	0.1224	0	0	0.0551506	0.111333	Novel transcripts (BRAKER)	0.0971264
MSTRG.11477.1	143.499	82.3118	83.7218	11.5301	16.0279	17.3065	Novel transcript variants (BRAKER)	59.0662
MSTRG.11478.2	9.28905	10.7141	8.36057	0.403273	1.31184	0.105928	Novel transcript variants (BRAKER)	5.0308
MSTRG.11479.1	3.88913	2.49488	3.22548	1.55215	0.743076	1.00003	Novel transcripts (BRAKER)	2.15079
MSTRG.1148.1	57.0206	72.5966	71.89	59.4262	42.8402	78.3155	Novel transcript variants (BRAKER)	63.6815
MSTRG.11480.1	112.774	176.905	196.873	249.615	161.164	438.916	Novel transcript variants (BRAKER)	222.708
MSTRG.11481.2	0.114187	0	0	0.923048	0.758563	0.957072	Novel transcript variants (BRAKER)	0.688217
MSTRG.11482.1	5.31957	2.38366	1.49503	1.38457	1.07402	2.58778	Novel transcripts (BRAKER)	2.37411
MSTRG.11483.1	11.8464	20.6055	15.6412	6.79832	9.20812	8.44755	Novel transcript variants (BRAKER)	12.0912
MSTRG.11484.1	94.964	125.269	87.6344	29.2822	50.8757	24.6069	Novel transcript variants (BRAKER)	68.772
MSTRG.11485.2	66.7173	56.7143	45.5565	22.5514	37.1046	19.8353	Transcripts from merged genes (BRAKER)	41.4132
MSTRG.11486.1	1.42377	0.499799	1.61962	215.474	251.209	294.814	Novel transcript variants (BRAKER)	127.507
MSTRG.11488.1	91.8672	80.3385	71.2511	87.3698	63.6576	104.05	Transcripts from merged genes (BRAKER)	83.089
MSTRG.11489.1	713.001	713.123	501.789	158.487	120.445	142.743	Novel transcript variants (BRAKER)	391.598
MSTRG.1149.1	7.62142	10.2153	9.91544	11.952	13.0412	7.919	Novel transcripts (BRAKER)	10.1107
MSTRG.11490.1	58.5779	73.9901	53.6732	63.9508	66.5428	80.4253	Novel transcript variants (BRAKER)	66.1933
MSTRG.11490.2	75.3677	95.1974	69.0572	82.2277	85.5812	103.477	Novel transcript variants (BRAKER)	85.1514
MSTRG.11491.2	0.0190311	0.0233824	0	0.0161938	0.0210712	0	Novel transcript variants (BRAKER)	0.0199196
MSTRG.11495.1	2.636	3.59855	3.48841	2.93529	2.05381	3.05497	Novel transcript variants (BRAKER)	2.96117
MSTRG.11496.1	34.2226	62.8624	60.281	50.0223	42.371	46.9682	Novel transcript variants (BRAKER)	49.4546
MSTRG.11496.2	37.2909	67.4919	65.2705	58.2309	47.2062	54.0697	Novel transcript variants (BRAKER)	54.9267
MSTRG.11496.3	83.2325	155.786	147.914	123.455	105.188	114.976	Novel transcript variants (BRAKER)	121.758
MSTRG.11496.4	84.9064	158.801	150.699	125.737	107.154	117.06	Novel transcript variants (BRAKER)	124.06
MSTRG.11497.1	8.59033	7.33783	11.6462	27.9018	14.7559	51.7675	Novel transcript variants (BRAKER)	20.3333
MSTRG.11498.1	3.79193	4.57572	4.54354	6.61033	7.99128	6.2258	Novel transcript variants (BRAKER)	5.6231
MSTRG.11498.2	3.10431	4.29931	4.81561	5.97854	6.76231	5.3578	Novel transcript variants (BRAKER)	5.05298
MSTRG.11498.3	9.76298	13.5969	15.1721	18.7349	21.3464	16.9001	Novel transcript variants (BRAKER)	15.9189
MSTRG.11499.2	16.4524	37.8737	38.9816	23.23	16.965	20.2049	Novel transcript variants (BRAKER)	25.6179
MSTRG.115.1	0.0892955	0.146283	0.0546963	78.2114	98.7193	92.4076	Novel transcripts (BRAKER)	44.9381
MSTRG.1150.2	24.1253	22.2916	19.4441	11.8849	14.6991	12.3612	Novel transcript variants (BRAKER)	17.4677
MSTRG.11500.2	19.1874	32.0103	27.4003	21.721	38.8851	21.7582	Novel transcript variants (BRAKER)	26.827
MSTRG.11501.2	36.2595	39.1114	32.3966	29.2344	37.3181	31.9228	Novel transcript variants (BRAKER)	34.3738
MSTRG.11502.1	5.59816	1.66138	1.88846	3.24473	3.60817	4.29171	Novel transcripts (BRAKER)	3.3821
MSTRG.11503.1	0	0	0.016119	0.089568	0.0728405	0.0294087	Novel transcripts (BRAKER)	0.051984
MSTRG.11504.2	4.23919	4.41928	3.69824	7.65158	6.18703	6.17311	Novel transcript variants (BRAKER)	5.39474
MSTRG.11505.1	20.6798	6.43378	9.62258	3.85163	2.99719	4.36425	Novel transcript variants (BRAKER)	7.99153
MSTRG.11506.1	2.10409	1.03407	0.463976	0.50131	0.931856	0.188114	Novel transcripts (BRAKER)	0.870569
MSTRG.11507.1	193.001	191.565	153.431	149.844	244.465	128.729	Novel transcript variants (BRAKER)	176.839
MSTRG.11507.2	26.5798	26.382	21.1302	20.6362	33.6673	17.7284	Novel transcript variants (BRAKER)	24.354
MSTRG.11507.3	30.0025	29.7792	23.8512	23.2936	38.0026	20.0112	Novel transcript variants (BRAKER)	27.49
MSTRG.11507.4	236.909	235.502	188.621	184.059	300.435	158.254	Novel transcript variants (BRAKER)	217.297
MSTRG.11508.1	6.5794	1.73843	2.25338	5.17709	4.30814	5.45531	Novel transcript variants (BRAKER)	4.25196
MSTRG.11509.1	1.99276	2.84696	1.9303	4.29831	2.64252	3.57357	Transcripts from merged genes (BRAKER)	2.88074
MSTRG.1151.1	0	0	0	1.16621	0.449616	2.49602	Novel transcripts (BRAKER)	1.37061
MSTRG.11510.1	1.22037	0.899639	0.44851	0.761514	0.675595	0.515224	Novel transcript variants (BRAKER)	0.753476
MSTRG.11512.1	0	0	0	0.12587	0.0818904	0.165312	Novel transcript variants (BRAKER)	0.124358
MSTRG.11513.1	11.3502	7.16536	4.73663	13.2071	15.775	13.7362	Novel transcript variants (BRAKER)	10.9951
MSTRG.11514.2	158.056	180.565	208.55	151.245	82.4181	245.616	Transcripts from merged genes (BRAKER)	171.075
MSTRG.11516.2	5.87998	18.3108	15.5619	21.6182	17.2174	31.0787	Novel transcript variants (BRAKER)	18.2779
MSTRG.11517.1	39.8354	68.7872	62.1638	63.8441	43.4383	79.203	Novel transcript variants (BRAKER)	59.5453
MSTRG.11518.1	4.62791	14.5656	14.0572	11.652	14.0383	15.0907	Novel transcript variants (BRAKER)	12.3386
MSTRG.11518.2	3.77089	11.8682	11.454	10.2414	11.9248	13.797	Novel transcript variants (BRAKER)	10.5094
MSTRG.11518.3	2.09806	6.42722	6.20289	5.54622	6.45784	7.47174	Novel transcript variants (BRAKER)	5.70066
MSTRG.11519.1	0.0249056	0	0	0.0211924	0.0137877	0.0278332	Novel transcript variants (BRAKER)	0.0219297
MSTRG.1152.1	52.8925	52.9334	45.9143	34.4986	25.5791	35.6743	Novel transcript variants (BRAKER)	41.2487
MSTRG.11520.1	36.3504	44.5301	36.7983	34.5953	46.0219	34.3161	Transcripts from merged genes (BRAKER)	38.7687
MSTRG.11521.1	69.5046	76.7374	45.7421	2.69579	3.72249	3.82956	Novel transcript variants (BRAKER)	33.7053
MSTRG.11521.2	110.476	122.098	72.8317	4.28488	5.91679	6.08698	Novel transcript variants (BRAKER)	53.6157
MSTRG.11522.1	20.4733	24.7017	24.1462	11.7558	11.2466	10.2048	Novel transcript variants (BRAKER)	17.0881
MSTRG.11523.1	9.18869	5.64479	4.30122	3.55398	4.20531	3.35487	Novel transcript variants (BRAKER)	5.04148
MSTRG.11523.2	33.8941	21.5008	16.4172	13.7935	15.1945	11.9399	Novel transcript variants (BRAKER)	18.79
MSTRG.11523.4	2.28955	2.12304	1.77287	1.36007	1.65013	0.531048	Novel transcript variants (BRAKER)	1.62112
MSTRG.11524.1	5.82864	6.26614	7.94376	6.07558	7.74414	4.07113	Novel transcript variants (BRAKER)	6.32156
MSTRG.11525.1	0.0814713	0	0.058221	0.0115541	0.0451023	0.0303494	Novel transcript variants (BRAKER)	0.0453396
MSTRG.11526.1	24.8539	29.7502	27.731	15.4371	18.5871	16.7651	Transcripts from merged genes (BRAKER)	22.1874
MSTRG.11526.3	30.0933	42.9032	42.9652	18.9749	24.26	16.3349	Transcripts from merged genes (BRAKER)	29.2553
MSTRG.11527.1	23.8747	27.2457	23.3737	13.9682	17.6173	14.4831	Novel transcript variants (BRAKER)	20.0938
MSTRG.11528.2	0.368414	0.0905297	0.0902661	162.105	222.228	184.781	Novel transcript variants (BRAKER)	94.9437
MSTRG.11529.1	0.0458356	0	0	0	0	0.0512236	Novel transcripts (BRAKER)	0.0485296
MSTRG.1153.1	15.7808	9.98943	18.4502	18.3853	5.28072	24.1465	Novel transcripts (BRAKER)	15.3388
MSTRG.11530.1	0	0	0.0383342	1.17156	1.38584	0.629459	Novel transcripts (BRAKER)	0.806298
MSTRG.11531.2	0.321151	0.473494	0.118029	0.327925	0.497807	0.574243	Novel transcript variants (BRAKER)	0.385441
MSTRG.11533.1	2.30902	2.98928	3.01854	9.75793	4.72702	5.78436	Novel transcript variants (BRAKER)	4.76436
MSTRG.11534.1	57.3807	46.9663	38.7255	30.5601	31.8001	18.3612	Novel transcript variants (BRAKER)	37.299
MSTRG.11535.1	83.2243	213.984	170.287	36.9477	59.8304	35.4786	Transcripts from merged genes (BRAKER)	99.9587
MSTRG.11536.1	96.5884	107.637	89.0109	40.3926	48.2826	41.0239	Transcripts from merged genes (BRAKER)	70.4892
MSTRG.11536.4	32.1158	25.8879	29.6388	41.5606	18.2602	76.5439	Transcripts from merged genes (BRAKER)	37.3345
MSTRG.11537.1	4.88149	2.1168	6.19999	35.1233	13.6311	48.9373	Transcripts from merged genes (BRAKER)	18.4817
MSTRG.11537.2	8.29853	3.59855	10.54	59.7096	23.1054	83.3299	Transcripts from merged genes (BRAKER)	31.4303
MSTRG.11537.3	0.895825	0.391756	1.24625	7.00253	2.74861	9.79071	Transcripts from merged genes (BRAKER)	3.67928
MSTRG.11538.1	0.0332829	0.0817853	0.135912	0.122723	0.135119	0.136383	Novel transcript variants (BRAKER)	0.107534
MSTRG.11539.1	0.269466	0.127337	0.126967	135.847	199.012	180.871	Novel transcript variants (BRAKER)	86.0423
MSTRG.1154.2	28.5832	44.6568	36.9375	16.8818	20.1213	15.4677	Transcripts from merged genes (BRAKER)	27.108
MSTRG.1154.3	83.2039	119.057	115.475	123.155	136.712	155.069	Transcripts from merged genes (BRAKER)	122.112
MSTRG.1154.4	60.9253	87.1781	84.5551	90.1787	100.121	113.548	Transcripts from merged genes (BRAKER)	89.4177
MSTRG.11541.2	0	0	0.0109727	0.182916	0.267759	0.120117	Novel transcript variants (BRAKER)	0.145441
MSTRG.11542.1	11.1115	8.76996	7.23563	6.48683	5.62374	8.11766	Novel transcript variants (BRAKER)	7.89088
MSTRG.11543.1	0.0210409	0	0.0128882	0.716158	1.16482	0.775971	Novel transcript variants (BRAKER)	0.538175
MSTRG.11543.3	2.04836	1.17664	2.4279	0.792262	0.618529	0.683772	Novel transcript variants (BRAKER)	1.29124
MSTRG.11544.1	1.49221	3.79468	6.27064	2.1556	1.28715	2.44326	Novel transcript variants (BRAKER)	2.90726
MSTRG.11545.2	0	0	0	0.0657869	0.0142669	0.0144003	Novel transcript variants (BRAKER)	0.0314847
MSTRG.11546.1	0.264706	0.153049	0.0667638	9.79137	17.2487	8.33523	Novel transcript variants (BRAKER)	5.97664
MSTRG.11546.2	1.78463	1.03184	0.450117	66.0128	116.29	56.1956	Novel transcript variants (BRAKER)	40.2941
MSTRG.11547.2	1.33427	1.03958	0.936887	2.5753	1.15302	2.65492	Novel transcript variants (BRAKER)	1.61566
MSTRG.11548.1	1.73711	2.21533	2.5456	2.39493	2.09374	1.96588	Novel transcript variants (BRAKER)	2.15876
MSTRG.11548.2	2.30921	2.94492	3.38397	3.18369	2.78329	2.61332	Novel transcript variants (BRAKER)	2.86973
MSTRG.11549.1	2.636	2.39904	5.50172	102.514	54.1557	206.647	Novel transcript variants (BRAKER)	62.3089
MSTRG.1155.1	0.322447	0.330143	0.296263	0.228645	0.833028	0.0600585	Novel transcripts (BRAKER)	0.345097
MSTRG.11551.1	57.3226	67.3444	67.7463	15.5468	8.72483	13.2486	Novel transcript variants (BRAKER)	38.3223
MSTRG.11552.1	4.65815	6.89919	6.17556	0.162891	0.282602	0.356556	Novel transcript variants (BRAKER)	3.08916
MSTRG.11553.1	1.52398	0.546122	0.466742	160.962	176.749	223.198	Novel transcript variants (BRAKER)	93.9075
MSTRG.11554.1	15.5669	24.0158	26.8535	12.3465	12.1865	8.13085	Transcripts from merged genes (BRAKER)	16.5167
MSTRG.11555.1	0.0283396	0	0	28.1295	14.5199	46.7621	Novel transcript variants (BRAKER)	22.36
MSTRG.11558.1	3.53218	3.20682	3.81975	3.60402	5.73643	3.35353	Transcripts from merged genes (BRAKER)	3.87546
MSTRG.1156.1	26.3664	32.4208	28.7072	17.0654	19.966	19.5255	Transcripts from merged genes (BRAKER)	24.0085
MSTRG.1156.2	46.845	47.9541	50.4134	39.161	29.2408	53.3919	Transcripts from merged genes (BRAKER)	44.501
MSTRG.11561.2	2.82853	5.60522	5.30946	1.08695	0.808189	2.03937	Novel transcript variants (BRAKER)	2.94629
MSTRG.11562.1	7.70549	6.29499	5.95542	6.35072	4.04241	4.46344	Novel transcript variants (BRAKER)	5.80208
MSTRG.11563.1	1850.06	1491	839.089	310.559	715.143	324.483	Novel transcript variants (BRAKER)	921.722
MSTRG.11564.1	69.2102	68.0685	59.2893	35.8471	21.6191	42.0731	Novel transcript variants (BRAKER)	49.3512
MSTRG.11566.1	71.7135	129.984	133.031	62.3812	87.3606	48.701	Novel transcript variants (BRAKER)	88.8619
MSTRG.11568.1	8.53028	8.6026	7.52047	9.73396	5.89611	15.6496	Novel transcript variants (BRAKER)	9.32217
MSTRG.11569.1	71.1496	119.476	109.778	69.789	106.583	48.7081	Novel transcript variants (BRAKER)	87.5807
MSTRG.11570.2	49.4497	54.7045	31.6974	20.5078	33.8101	20.6225	Novel transcript variants (BRAKER)	35.132
MSTRG.11571.1	19.0408	16.987	15.4889	44.1171	21.2498	41.1351	Novel transcript variants (BRAKER)	26.3364
MSTRG.11572.1	2.42239	3.11153	3.10247	0.0936928	0	0	Novel transcripts (BRAKER)	2.18252
MSTRG.11573.1	0.134618	0.189025	0.0824575	0.0490918	0.0638777	0	Novel transcript variants (BRAKER)	0.103814
MSTRG.11575.1	12.7929	18.6768	19.2411	21.5068	14.4151	25.7572	Transcripts from merged genes (BRAKER)	18.7316
MSTRG.11576.1	0.520692	0.683362	0.732113	19.2229	12.1853	30.9333	Novel transcript variants (BRAKER)	10.7129
MSTRG.11578.1	2.3806	1.41577	1.48922	1.91793	1.50015	1.08965	Novel transcript variants (BRAKER)	1.63222
MSTRG.11579.1	0.0476243	0	0.0291714	0.324192	0.263647	0.42578	Novel transcript variants (BRAKER)	0.218083
MSTRG.1158.1	66.639	59.4257	41.1477	41.842	49.5354	42.4413	Novel transcript variants (BRAKER)	50.1719
MSTRG.11580.1	0	0	0	2.52088	1.41642	3.23556	Novel transcripts (BRAKER)	2.39095
MSTRG.11581.1	0.036429	0	0.0223139	0.0309979	0.0605011	0.0814225	Novel transcript variants (BRAKER)	0.0463329
MSTRG.11582.1	77.4257	69.6601	54.8322	10.9423	12.2404	10.167	Transcripts from merged genes (BRAKER)	39.2113
MSTRG.11582.2	150.32	135.243	106.455	21.2442	23.7645	19.7391	Transcripts from merged genes (BRAKER)	76.1278
MSTRG.11584.1	93.2018	25.8257	37.1552	45.8497	41.2298	34.8782	Novel transcript variants (BRAKER)	46.3567
MSTRG.11585.1	0	0.0270772	0	0	0.0122004	0	Novel transcript variants (BRAKER)	0.0196388
MSTRG.11586.1	0.048572	0	0.0297519	0.144657	0.215115	0.244268	Novel transcripts (BRAKER)	0.136473
MSTRG.11587.1	152.918	165.586	128.573	140.143	136.999	150.021	Transcripts from merged genes (BRAKER)	145.707
MSTRG.11588.1	78.5345	168.815	178.612	29.9312	37.5154	19.7354	Novel transcript variants (BRAKER)	85.5239
MSTRG.11589.1	115.789	148.74	150.879	130.842	194.409	100.214	Transcripts from merged genes (BRAKER)	140.146
MSTRG.11589.2	65.6304	84.2721	85.4837	74.6727	110.637	57.0258	Transcripts from merged genes (BRAKER)	79.6203
MSTRG.1159.1	9.42042	10.0778	7.58882	17.6513	23.2837	13.0374	Transcripts from merged genes (BRAKER)	13.5099
MSTRG.11591.1	0.0659661	0.0405243	0.0606094	28.9918	18.1315	49.4664	Novel transcript variants (BRAKER)	16.1261
MSTRG.11592.2	4.55606	1.77706	1.37322	1.96917	1.84162	2.02049	Novel transcript variants (BRAKER)	2.25627
MSTRG.11594.2	4.79535	24.2373	29.1971	1.27055	1.11275	1.15524	Transcripts from merged genes (BRAKER)	10.2947
MSTRG.11594.3	8.19305	41.4105	49.8845	2.17079	1.90117	1.97378	Transcripts from merged genes (BRAKER)	17.589
MSTRG.11595.2	20.0069	8.15436	9.92761	8.18466	7.2951	7.68581	Novel transcript variants (BRAKER)	10.2091
MSTRG.11595.3	11.3368	4.55555	5.55531	4.58497	4.16433	4.2927	Novel transcript variants (BRAKER)	5.74828
MSTRG.11596.1	0.411073	0	0.0629488	4.98446	10.2406	10.1067	Novel transcript variants (BRAKER)	5.16115
MSTRG.11597.1	119.754	117.533	125.824	129.703	165.673	126.088	Novel transcript variants (BRAKER)	130.763
MSTRG.11598.1	34.7036	33.2197	50.9255	54.089	21.2255	119.633	Novel transcript variants (BRAKER)	52.2993
MSTRG.11599.1	0.704908	1.40016	1.24496	8.52736	13.3461	7.89083	Novel transcript variants (BRAKER)	5.51905
MSTRG.116.1	43.1091	49.2151	43.0759	33.4927	57.2064	30.947	Novel transcript variants (BRAKER)	42.841
MSTRG.116.2	80.3587	91.6585	80.2249	62.3976	106.542	57.6628	Novel transcript variants (BRAKER)	79.8073
MSTRG.11600.1	0	0.0321587	0.0160325	58.0184	89.9248	81.8443	Novel transcript variants (BRAKER)	45.9671
MSTRG.11601.1	15.258	18.681	18.9534	12.7789	12.7293	11.1491	Novel transcript variants (BRAKER)	14.9249
MSTRG.11601.2	10.3993	12.7323	12.918	8.70965	8.6758	7.59883	Novel transcript variants (BRAKER)	10.1723
MSTRG.11602.1	25.99	26.8385	25.0947	18.5115	27.8382	12.7041	Novel transcript variants (BRAKER)	22.8295
MSTRG.11603.2	0	0.0549607	0	0.323542	0.352888	0.437425	Novel transcript variants (BRAKER)	0.292204
MSTRG.11604.1	21.0178	45.8135	52.4713	14.3075	7.65152	20.1591	Novel transcript variants (BRAKER)	26.9034
MSTRG.11605.1	3.36127	4.85144	3.68845	4.8257	9.02524	4.26386	Novel transcript variants (BRAKER)	5.00266
MSTRG.11606.1	0.929217	2.08546	1.86689	0.706342	0.692742	0.443071	Novel transcripts (BRAKER)	1.12062
MSTRG.11607.1	3.33518	2.11095	3.92485	4.31711	5.86355	3.07214	Novel transcript variants (BRAKER)	3.77063
MSTRG.11608.2	84.4611	76.7134	67.9073	70.1026	78.9885	41.3589	Novel transcript variants (BRAKER)	69.922
MSTRG.11609.1	116.107	83.2859	56.606	99.59	154.85	84.0932	Novel transcript variants (BRAKER)	99.0887
MSTRG.1161.1	65.0328	44.4948	51.2637	113.194	62.436	146.324	Novel transcript variants (BRAKER)	80.4576
MSTRG.11610.1	18.614	12.4346	9.72593	8.33786	10.661	9.61174	Novel transcript variants (BRAKER)	11.5642
MSTRG.11611.1	142.539	110.98	173.801	163.599	72.72	295.185	Transcripts from merged genes (BRAKER)	159.804
MSTRG.11612.1	5.28349	6.59735	4.60822	11.1417	11.4931	11.4882	Novel transcript variants (BRAKER)	8.43535
MSTRG.11613.1	18.6196	16.8314	12.5313	34.2213	51.9259	34.5841	Novel transcript variants (BRAKER)	28.1189
MSTRG.11614.1	22.7589	19.2291	19.2781	32.3917	31.433	42.5179	Novel transcript variants (BRAKER)	27.9348
MSTRG.11615.2	2.72455	2.92906	5.70199	26.6128	3.86503	20.6794	Novel transcript variants (BRAKER)	10.4188
MSTRG.11616.1	88.0502	65.5353	66.8302	44.5028	19.0013	47.3553	Novel transcript variants (BRAKER)	55.2125
MSTRG.11617.1	0.0205105	0	0.0251266	11.5885	5.41612	25.9242	Novel transcripts (BRAKER)	8.59489
MSTRG.11617.2	0.0191056	0	0.0234056	10.7948	5.14034	24.1059	Novel transcripts (BRAKER)	8.0167
MSTRG.11618.1	0.133132	0	0.0815472	0.113283	0.0368507	0	Novel transcript variants (BRAKER)	0.0912031
MSTRG.11619.1	30.0444	104.886	97.2661	4.87072	6.2573	4.80587	Novel transcript variants (BRAKER)	41.3551
MSTRG.1162.1	64.5904	59.5371	41.7698	15.6018	24.5686	12.5406	Novel transcript variants (BRAKER)	36.4347
MSTRG.11621.1	0.0315954	0	0.0193532	1.20982	0.559717	1.55362	Novel transcript variants (BRAKER)	0.67482
MSTRG.11622.1	0.673309	0.754869	0.582547	0.0931005	0.0745485	0.169303	Novel transcript variants (BRAKER)	0.391279
MSTRG.11623.1	0.255835	0.202793	0.0808809	0.168536	0.146198	0.101451	Transcripts from merged genes (BRAKER)	0.159282
MSTRG.11623.2	2.8824	2.2848	0.968212	1.89884	1.64717	1.14302	Transcripts from merged genes (BRAKER)	1.80407
MSTRG.11624.2	104.171	138.304	103.217	115.639	143.713	91.1037	Novel transcript variants (BRAKER)	116.025
MSTRG.11625.1	4.11073	4.34913	3.3223	2.04042	1.99123	1.46751	Transcripts from merged genes (BRAKER)	2.88022
MSTRG.11626.1	1.59254	0.595505	0.593772	17.4986	10.2346	9.05349	Transcripts from merged genes (BRAKER)	6.59475
MSTRG.11627.2	0.155792	0.0638042	0.127237	0.132565	0.0574975	0.11607	Novel transcript variants (BRAKER)	0.108828
MSTRG.11627.3	0.113085	0.0463134	0.0923572	0.0962251	0.0417356	0.0842519	Novel transcript variants (BRAKER)	0.0789947
MSTRG.11628.2	0.446308	0.137088	0.273377	1.37666	1.26626	0.311732	Novel transcript variants (BRAKER)	0.635237
MSTRG.11629.1	0.339408	0.22077	0.232357	127.126	156.13	185.503	Novel transcript variants (BRAKER)	78.2586
MSTRG.1163.2	4.36345	0.930239	1.1106	9.30771	7.4674	8.1941	Novel transcript variants (BRAKER)	5.22892
MSTRG.11630.1	28.4089	20.3073	29.7322	4.07181	0.852582	4.54865	Novel transcript variants (BRAKER)	14.6536
MSTRG.11631.1	2.57485	4.48172	5.38869	13.7849	5.28598	13.1887	Novel transcripts (BRAKER)	7.45079
MSTRG.11632.2	0.213398	0.163869	0.130713	2.42867	1.94926	2.38484	Novel transcript variants (BRAKER)	1.21179
MSTRG.11633.1	0.0224436	0.0827254	0.0549897	3.05561	5.39234	2.70884	Novel transcript variants (BRAKER)	1.88616
MSTRG.11634.1	0	0	0	0.212763	0.119547	0.279434	Novel transcripts (BRAKER)	0.203914
MSTRG.11635.1	1.48462	0.951684	1.45302	1.42805	2.1083	1.24435	Novel transcript variants (BRAKER)	1.44501
MSTRG.11636.1	27.7474	10.6211	13.5155	19.7526	8.13224	15.4032	Novel transcript variants (BRAKER)	15.862
MSTRG.11637.1	0.0505854	0.0621512	0.185911	0.538046	0.0980138	0.621849	Novel transcripts (BRAKER)	0.259426
MSTRG.11638.1	17.5199	9.3661	25.3951	19.2892	3.92401	26.3051	Novel transcript variants (BRAKER)	16.9665
MSTRG.11639.1	1.24256	0.327141	0.815472	2.0391	0.393074	2.67806	Novel transcript variants (BRAKER)	1.24923
MSTRG.1164.1	46.6148	40.8005	41.3134	53.4133	39.9267	64.7722	Novel transcript variants (BRAKER)	47.8068
MSTRG.1164.3	97.3484	102.85	91.0147	170.809	245.731	174.255	Novel transcript variants (BRAKER)	147.001
MSTRG.11640.1	47.5303	19.7289	33.953	58.9172	21.9035	52.8304	Novel transcripts (BRAKER)	39.1439
MSTRG.11641.1	46.8801	9.10195	15.999	10.5278	12.4937	9.61614	Novel transcript variants (BRAKER)	17.4364
MSTRG.11643.1	0.0742997	0	0.00910218	9.14197	14.9968	10.5287	Novel transcripts (BRAKER)	6.95016
[truncated: 25,791 more rows]
