# Supplementary material for: Identification of Novel Genes and Proteoforms in Angiostrongylus costaricensis through a Proteogenomic Approach
Source: Pathogens. 2022 Oct 31;11(11):1273. doi: 10.3390/pathogens11111273 (PMC9694666; doi:10.3390/pathogens11111273)
Supplement: Supplementary file 1 [file pathogens-11-01273-s001.zip › Supplemental_Data_S12.xlsx]

## Sheet: NIAF
Supplemental Data S12. Normalized protein levels (NIAF) of each quantified protein
	NIAF
Protein ID	Sample 1	Sample 2	Sample 3	Sample 4	Sample 5	Sample 6	Sample 7	Sample 8	Protein Category
MSTRG.6041.1	0.00074767	0.000567083	0.000657	0.000657	0.000627	0.000647	0.000644	0.00064	Novel proteoforms (BRAKER)	0.000648344
ACOC_0000610901-mRNA-1	0.000729492	0.000556533	0.000643	0.000643	0.000614	0.000633	0.00063	0.000626	Reference proteoforms (WormBase)	0.000634378
ACOC_0000079101-mRNA-1	0.000242723	0.0002479	0.000245	0.000245	0.000246	0.000246	0.000246	0.000246	Reference proteoforms (WormBase)	0.000245578
MSTRG.751.1	0.000275517	NA	NA	NA	NA	NA	NA	NA	Novel proteoforms (BRAKER)	0.000275517
MSTRG.5713.1	2.05667e-05	0.000102658	6.2e-05	6.2e-05	7.5e-05	6.6e-05	6.8e-05	7e-05	Novel proteoforms (BRAKER)	6.57781e-05
MSTRG.6389.1	5.035e-05	6.2082e-05	5.6e-05	5.6e-05	5.8e-05	5.7e-05	5.7e-05	5.7e-05	Novel proteoforms (BRAKER)	5.6679e-05
MSTRG.769.4	NA	NA	NA	NA	NA	NA	NA	NA	Proteins from merged genes (BRAKER)	#DIV/0!
MSTRG.4254.1	0.00120137	0.00111015	0.001156	0.001156	0.001141	0.001151	0.001149	0.001147	Novel proteoforms (BRAKER)	0.00115144
MSTRG.6697.1	0.000248225	0.000219421	0.000234	0.000234	0.000229	0.000232	0.000232	0.000231	Novel proteoforms (BRAKER)	0.000232456
MSTRG.4653.3	NA	NA	NA	NA	NA	NA	NA	NA	Proteins from merged genes (BRAKER)	#DIV/0!
ACOC_0001269701-mRNA-1	2.87667e-05	2.6585e-05	2.8e-05	2.8e-05	2.7e-05	2.8e-05	2.8e-05	2.7e-05	Reference proteoforms (WormBase)	2.7669e-05
MSTRG.7024.1	0.00651247	0.00631439	0.006413	0.006413	0.00638	0.006402	0.006399	0.006394	Proteins from merged genes (BRAKER)	0.00640348
MSTRG.7024.5	0.00710491	0.00632492	0.006715	0.006715	0.006585	0.006672	0.006657	0.006638	Proteins from merged genes (BRAKER)	0.00667648
ACOC_0001129101-mRNA-1	NA	0.00799687	NA	NA	NA	NA	NA	NA	Reference proteoforms (WormBase)	0.00799687
MSTRG.6243.3	0.000124207	0.000108286	0.000116	0.000116	0.000114	0.000115	0.000115	0.000115	Novel proteoforms (BRAKER)	0.000115437
ACOC_0000288101-mRNA-1	0.0152629	0.0146755	0.014969	0.014969	0.014871	0.014937	0.014926	0.014911	Reference proteoforms (WormBase)	0.0149402
MSTRG.5570.1	NA	NA	NA	NA	NA	NA	NA	NA	Novel proteoforms (BRAKER)	#DIV/0!
ACOC_0000790301-mRNA-1	0.00213207	0.00247378	0.002303	0.002303	0.00236	0.002322	0.002328	0.002337	Reference proteins (WormBase)	0.00231986
ACOC_0000938301-mRNA-1	6.46e-05	7.17e-05	6.8e-05	6.8e-05	6.9e-05	6.9e-05	6.9e-05	6.9e-05	Proteins from split genes (WormBase)	6.85375e-05
MSTRG.9171.1	NA	9.29e-05	NA	NA	NA	NA	NA	NA	Proteins from merged genes (BRAKER)	9.29e-05
ACOC_0000577001-mRNA-1	NA	NA	NA	NA	NA	NA	NA	NA	Reference proteoforms (WormBase)	#DIV/0!
MSTRG.8369.1	0.0014261	0.00153805	0.001482	0.001482	0.001501	0.001488	0.00149	0.001493	Novel proteoforms (BRAKER)	0.00148752
ACOC_0000186201-mRNA-1	0.00313248	0.00327234	0.003202	0.003202	0.003226	0.00321	0.003213	0.003216	Reference proteins (WormBase)	0.00320923
ACOC_0000312001-mRNA-1	0.00115118	NA	NA	NA	NA	NA	NA	NA	Proteins from split genes (WormBase)	0.00115118
ACOC_0000154301-mRNA-1	0.0076239	0.00645843	0.007041	0.007041	0.006847	0.006976	0.006955	0.006926	Reference proteoforms (WormBase)	0.00698354
MSTRG.7631.1	0.000184005	0.000171595	0.000178	0.000178	0.000176	0.000177	0.000177	0.000177	Novel proteoforms (BRAKER)	0.000177325
MSTRG.2686.1	0.00815592	0.00949452	0.008825	0.008825	0.009048	0.0089	0.008924	0.008957	Novel proteoforms (BRAKER)	0.00889118
MSTRG.445.1	0.00051056	0.000401294	0.000456	0.000456	0.000438	0.00045	0.000448	0.000445	Novel proteoforms (BRAKER)	0.000450607
MSTRG.9818.1	0.00163315	0.00172028	0.001677	0.001677	0.001691	0.001682	0.001683	0.001685	Novel proteoforms (BRAKER)	0.00168105
ACOC_0000628401-mRNA-1	NA	NA	NA	NA	NA	NA	NA	NA	Reference proteins (WormBase)	#DIV/0!
MSTRG.3358.1	NA	0.00403898	NA	NA	NA	NA	NA	NA	Novel proteoforms (BRAKER)	0.00403898
ACOC_0000753801-mRNA-1	NA	NA	NA	NA	NA	NA	NA	NA	Reference proteoforms (WormBase)	#DIV/0!
MSTRG.8291.1	0.0037333	0.00305455	0.003394	0.003394	0.003281	0.003356	0.003344	0.003327	Novel proteoforms (BRAKER)	0.00336048
MSTRG.10527.1	0.000131307	0.000105626	0.000118	0.000118	0.000114	0.000117	0.000117	0.000116	Novel proteoforms (BRAKER)	0.000117117
MSTRG.5015.1	0.00110859	0.000981596	0.001045	0.001045	0.001024	0.001038	0.001036	0.001033	Novel proteoforms (BRAKER)	0.0010389
MSTRG.1679.1	0.00106432	0.00119751	0.001131	0.001131	0.001153	0.001138	0.001141	0.001144	Novel proteoforms (BRAKER)	0.00113748
ACOC_0000748401-mRNA-1	0.000356684	0.000182251	0.000269	0.000269	0.00024	0.00026	0.000257	0.000252	Proteins from split genes (WormBase)	0.000260742
MSTRG.7310.1	0.000905885	0.000876171	0.000891	0.000891	0.000886	0.000889	0.000889	0.000888	Novel proteoforms (BRAKER)	0.000889507
MSTRG.12541.1	NA	NA	NA	NA	NA	NA	NA	NA	Novel proteoforms (BRAKER)	#DIV/0!
MSTRG.10640.1	7.5e-06	5.24e-06	6e-06	6e-06	6e-06	6e-06	6e-06	6e-06	Novel proteoforms (BRAKER)	6.0925e-06
MSTRG.7544.1	0.000345073	0.000285404	0.000315	0.000315	0.000305	0.000312	0.000311	0.000309	Novel proteoforms (BRAKER)	0.000312185
ACOC_0000764401-mRNA-1	NA	0.000259817	NA	NA	NA	NA	NA	NA	Reference proteoforms (WormBase)	0.000259817
MSTRG.10130.1	0.000215599	0.000229981	0.000223	0.000223	0.000225	0.000224	0.000224	0.000224	Novel proteoforms (BRAKER)	0.000223573
MSTRG.1992.1	5.36333e-05	5.29333e-05	5.3e-05	5.3e-05	5.3e-05	5.3e-05	5.3e-05	5.3e-05	Novel proteoforms (BRAKER)	5.30708e-05
MSTRG.385.1	0.00913736	0.00917315	0.009155	0.009155	0.009161	0.009157	0.009158	0.009159	Novel proteoforms (BRAKER)	0.00915694
MSTRG.4773.5	0.00014313	0.000126753	0.000135	0.000135	0.000132	0.000134	0.000134	0.000133	Proteins from merged genes (BRAKER)	0.00013411
MSTRG.4538.1	NA	NA	NA	NA	NA	NA	NA	NA	Proteins from merged genes (BRAKER)	#DIV/0!
MSTRG.3058.1	NA	2.58e-05	NA	NA	NA	NA	NA	NA	Novel proteoforms (BRAKER)	2.58e-05
MSTRG.5256.1	0.000256692	0.000231837	0.000244	0.000244	0.00024	0.000243	0.000242	0.000242	Novel proteins (BRAKER)	0.000242941
MSTRG.5772.1	6.16e-06	5.55e-06	6e-06	6e-06	6e-06	6e-06	6e-06	6e-06	Novel proteins (BRAKER)	5.96375e-06
MSTRG.10855.1	0.000162407	0.000197425	0.00018	0.00018	0.000186	0.000182	0.000183	0.000183	Novel proteoforms (BRAKER)	0.000181729
MSTRG.6710.1	0.00121828	0.00122359	0.001221	0.001221	0.001222	0.001221	0.001221	0.001221	Proteins from merged genes (BRAKER)	0.00122111
ACOC_0000768501-mRNA-1	NA	NA	NA	NA	NA	NA	NA	NA	Reference proteoforms (WormBase)	#DIV/0!
MSTRG.9735.1	0.000286359	0.000262099	0.000274	0.000274	0.00027	0.000273	0.000272	0.000272	Novel proteoforms (BRAKER)	0.000272932
MSTRG.7580.1	NA	NA	NA	NA	NA	NA	NA	NA	Novel proteoforms (BRAKER)	#DIV/0!
ACOC_0000162201-mRNA-1	NA	NA	NA	NA	NA	NA	NA	NA	Proteins from split genes (WormBase)	#DIV/0!
MSTRG.1741.2	0.000391622	0.000378575	0.000385	0.000385	0.000383	0.000384	0.000384	0.000384	Novel proteoforms (BRAKER)	0.0003844
ACOC_0000151901-mRNA-1	0.000386218	0.000314731	0.00035	0.00035	0.000339	0.000347	0.000345	0.000343	Reference proteoforms (WormBase)	0.000346869
ACOC_0000581301-mRNA-1	NA	1.22e-05	NA	NA	NA	NA	NA	NA	Reference proteoforms (WormBase)	1.22e-05
MSTRG.6677.1	0.00220822	0.00192154	0.002065	0.002065	0.002017	0.002049	0.002044	0.002037	Novel proteoforms (BRAKER)	0.00205085
MSTRG.1397.3	0.000223163	0.00019467	0.000209	0.000209	0.000204	0.000207	0.000207	0.000206	Novel proteoforms (BRAKER)	0.000207479
ACOC_0000147901-mRNA-1	0.000185816	0.000213892	0.0002	0.0002	0.000205	0.000201	0.000202	0.000203	Reference proteoforms (WormBase)	0.000201338
MSTRG.203.1	NA	NA	NA	NA	NA	NA	NA	NA	Novel proteoforms (BRAKER)	#DIV/0!
MSTRG.5645.1	0.000181497	0.000178119	0.00018	0.00018	0.000179	0.00018	0.00018	0.000179	Novel proteoforms (BRAKER)	0.000179702
MSTRG.10205.1	0.00210361	0.00176521	0.001934	0.001934	0.001878	0.001916	0.001909	0.001901	Novel proteoforms (BRAKER)	0.0019176
ACOC_0000135901-mRNA-1	8.58e-05	9.62077e-05	9.1e-05	9.1e-05	9.3e-05	9.2e-05	9.2e-05	9.2e-05	Proteins from split genes (WormBase)	9.1626e-05
MSTRG.3501.1	0.000191282	0.000159766	0.000176	0.000176	0.00017	0.000174	0.000173	0.000172	Novel proteoforms (BRAKER)	0.000174006
ACOC_0001098201-mRNA-1	NA	NA	NA	NA	NA	NA	NA	NA	Reference proteoforms (WormBase)	#DIV/0!
MSTRG.10718.1	0.000205593	0.000168915	0.000187	0.000187	0.000181	0.000185	0.000185	0.000184	Novel proteoforms (BRAKER)	0.000185439
MSTRG.1256.1	0.00186517	0.0019109	0.001888	0.001888	0.001896	0.001891	0.001891	0.001893	Proteins from merged genes (BRAKER)	0.00189038
MSTRG.7472.1	0.00287085	0.00704657	0.004959	0.004959	0.005655	0.005191	0.005268	0.005371	Novel proteoforms (BRAKER)	0.00516505
MSTRG.7344.1	0.00279167	0.00220378	0.002498	0.002498	0.0024	0.002465	0.002454	0.00244	Novel proteoforms (BRAKER)	0.00246881
ACOC_0000744801-mRNA-1	0.00238929	NA	NA	NA	NA	NA	NA	NA	Reference proteoforms (WormBase)	0.00238929
ACOC_0000957301-mRNA-1	0.000128005	NA	NA	NA	NA	NA	NA	NA	Reference proteoforms (WormBase)	0.000128005
MSTRG.7334.1	0.000743526	0.00058472	0.000664	0.000664	0.000638	0.000655	0.000652	0.000648	Novel proteoforms (BRAKER)	0.000656156
MSTRG.9360.1	NA	NA	NA	NA	NA	NA	NA	NA	Novel proteoforms (BRAKER)	#DIV/0!
MSTRG.7366.1	0.00581886	0.00531715	0.005568	0.005568	0.005484	0.00554	0.005531	0.005518	Novel proteoforms (BRAKER)	0.00554313
MSTRG.7837.1	6.59667e-05	4.31e-05	5.5e-05	5.5e-05	5.1e-05	5.3e-05	5.3e-05	5.2e-05	Novel proteoforms (BRAKER)	5.35083e-05
ACOC_0000886201-mRNA-1	0.00111452	0.00108933	0.001102	0.001102	0.001098	0.001101	0.0011	0.001099	Reference proteins (WormBase)	0.00110073
MSTRG.6476.1	0.000487011	0.000371306	0.000429	0.000429	0.00041	0.000423	0.000421	0.000418	Novel proteoforms (BRAKER)	0.00042354
MSTRG.5012.1	0.00235928	0.00197751	0.002168	0.002168	0.002105	0.002147	0.00214	0.002131	Novel proteoforms (BRAKER)	0.00214947
ACOC_0001087601-mRNA-1	0.00255352	0.0025145	0.002534	0.002534	0.002528	0.002532	0.002531	0.00253	Reference proteoforms (WormBase)	0.00253213
MSTRG.12198.1	0.00551198	0.00636218	0.005937	0.005937	0.006079	0.005984	0.006	0.006021	Novel proteoforms (BRAKER)	0.00597902
MSTRG.2236.1	0.000175724	0.000204291	0.00019	0.00019	0.000195	0.000192	0.000192	0.000193	Novel proteoforms (BRAKER)	0.000191502
MSTRG.3344.1	NA	NA	NA	NA	NA	NA	NA	NA	Novel proteoforms (BRAKER)	#DIV/0!
ACOC_0000914201-mRNA-1	NA	NA	NA	NA	NA	NA	NA	NA	Reference proteoforms (WormBase)	#DIV/0!
MSTRG.7985.1	0.00141169	0.00240589	0.001909	0.001909	0.002074	0.001964	0.001982	0.002007	Novel proteoforms (BRAKER)	0.00195782
ACOC_0000923901-mRNA-1	4.46333e-05	3.84333e-05	4.2e-05	4.2e-05	4.1e-05	4.1e-05	4.1e-05	4.1e-05	Reference proteins (WormBase)	4.13833e-05
MSTRG.5151.1	0.000382623	0.000301173	0.000342	0.000342	0.000328	0.000337	0.000336	0.000334	Novel proteoforms (BRAKER)	0.000337849
ACOC_0000473701-mRNA-1	0.00026739	0.000150807	0.000209	0.000209	0.00019	0.000203	0.0002	0.000198	Reference proteins (WormBase)	0.0002034
MSTRG.3887.1	0.00302715	0.00337203	0.0032	0.0032	0.003257	0.003219	0.003225	0.003234	Novel proteoforms (BRAKER)	0.00321677
ACOC_0001257201-mRNA-1	0.00120751	0.0011825	0.001195	0.001195	0.001191	0.001194	0.001193	0.001193	Reference proteoforms (WormBase)	0.00119388
ACOC_0000224001-mRNA-1	0.000294202	0.000354217	0.000324	0.000324	0.000334	0.000328	0.000329	0.00033	Reference proteins (WormBase)	0.000327177
ACOC_0000209301-mRNA-1	NA	NA	NA	NA	NA	NA	NA	NA	Reference proteoforms (WormBase)	#DIV/0!
MSTRG.7565.1	NA	NA	NA	NA	NA	NA	NA	NA	Novel proteoforms (BRAKER)	#DIV/0!
MSTRG.12302.1	NA	0.00106729	NA	NA	NA	NA	NA	NA	Novel proteoforms (BRAKER)	0.00106729
MSTRG.12998.1	NA	NA	NA	NA	NA	NA	NA	NA	Novel proteoforms (BRAKER)	#DIV/0!
MSTRG.5911.1	4.51667e-05	0.000122617	8.4e-05	8.4e-05	9.7e-05	8.8e-05	9e-05	9.2e-05	Proteins from merged genes (BRAKER)	8.7848e-05
ACOC_0000367801-mRNA-1	0.00416373	0.00357819	0.003871	0.003871	0.003773	0.003838	0.003828	0.003813	Reference proteoforms (WormBase)	0.00384199
MSTRG.9894.1	NA	0.000129935	NA	NA	NA	NA	NA	NA	Novel proteoforms (BRAKER)	0.000129935
MSTRG.1464.1	0.000182694	0.000220015	0.000201	0.000201	0.000208	0.000203	0.000204	0.000205	Novel proteoforms (BRAKER)	0.000203089
MSTRG.10096.1	4.41667e-05	5.40333e-05	4.9e-05	4.9e-05	5.1e-05	5e-05	5e-05	5e-05	Proteins from merged genes (BRAKER)	4.965e-05
MSTRG.5861.1	0.00144801	0.00124163	0.001345	0.001345	0.00131	0.001333	0.00133	0.001324	Proteins from merged genes (BRAKER)	0.00133458
MSTRG.5861.4	0.00337134	0.00268774	0.00303	0.00303	0.002916	0.002992	0.002979	0.002962	Proteins from merged genes (BRAKER)	0.00299601
MSTRG.9979.1	5.82667e-05	4.25e-05	5e-05	5e-05	4.8e-05	5e-05	4.9e-05	4.9e-05	Proteins from merged genes (BRAKER)	4.95958e-05
MSTRG.8904.1	0.000111436	9.42103e-05	0.000103	0.000103	0.0001	0.000102	0.000102	0.000101	Novel proteoforms (BRAKER)	0.000102081
MSTRG.3446.2	0.000278054	0.000300812	0.000289	0.000289	0.000293	0.000291	0.000291	0.000292	Novel proteoforms (BRAKER)	0.000290483
MSTRG.317.1	0.00074258	0.000596693	0.00067	0.00067	0.000645	0.000662	0.000659	0.000655	Novel proteoforms (BRAKER)	0.000662534
MSTRG.6517.2	0.000283133	0.000331602	0.000307	0.000307	0.000315	0.00031	0.000311	0.000312	Novel proteoforms (BRAKER)	0.000309592
MSTRG.8429.1	NA	NA	NA	NA	NA	NA	NA	NA	Novel proteoforms (BRAKER)	#DIV/0!
ACOC_0001159001-mRNA-1	0.0012273	NA	NA	NA	NA	NA	NA	NA	Reference proteins (WormBase)	0.0012273
ACOC_0000153601-mRNA-1	0.00461998	0.00393863	0.004279	0.004279	0.004166	0.004241	0.004229	0.004212	Reference proteins (WormBase)	0.00424558
MSTRG.458.1	0.000210102	0.000136608	0.000173	0.000173	0.000161	0.000169	0.000168	0.000166	Novel proteoforms (BRAKER)	0.000169589
ACOC_0000562401-mRNA-1	0.00412911	0.0037808	0.003955	0.003955	0.003897	0.003936	0.003929	0.003921	Reference proteoforms (WormBase)	0.00393786
MSTRG.674.2	8.4728e-05	4.89e-05	6.7e-05	6.7e-05	6.1e-05	6.5e-05	6.4e-05	6.3e-05	Proteins from merged genes (BRAKER)	6.50785e-05
ACOC_0001205201-mRNA-1	0.00153875	0.00145552	0.001497	0.001497	0.001483	0.001493	0.001491	0.001489	Reference proteins (WormBase)	0.00149303
MSTRG.2232.1	0.000216644	0.000180759	0.000199	0.000199	0.000193	0.000197	0.000196	0.000195	Novel proteoforms (BRAKER)	0.00019705
ACOC_0000949401-mRNA-1	0.00441933	0.00362592	0.004023	0.004023	0.00389	0.003979	0.003964	0.003944	Reference proteins (WormBase)	0.00398353
ACOC_0000871401-mRNA-1	0.00169474	0.0011695	0.001432	0.001432	0.001345	0.001403	0.001393	0.00138	Reference proteins (WormBase)	0.00140615
MSTRG.11127.1	0.00159147	NA	NA	NA	NA	NA	NA	NA	Proteins from merged genes (BRAKER)	0.00159147
MSTRG.1893.1	0.00146806	0.0010455	0.001257	0.001257	0.001186	0.001233	0.001225	0.001215	Novel proteoforms (BRAKER)	0.00123582
ACOC_0000004101-mRNA-1	0.000906607	0.000604985	0.000756	0.000756	0.000706	0.000739	0.000733	0.000726	Reference proteins (WormBase)	0.000740949
MSTRG.9286.1	0.000631752	0.000373439	0.000503	0.000503	0.00046	0.000488	0.000483	0.000477	Novel proteoforms (BRAKER)	0.000489899
MSTRG.8086.1	NA	NA	NA	NA	NA	NA	NA	NA	Novel proteoforms (BRAKER)	#DIV/0!
MSTRG.2145.1	NA	NA	NA	NA	NA	NA	NA	NA	Novel proteoforms (BRAKER)	#DIV/0!
MSTRG.6083.1	NA	NA	NA	NA	NA	NA	NA	NA	Novel proteoforms (BRAKER)	#DIV/0!
MSTRG.9770.1	0.0014917	0.00141109	0.001451	0.001451	0.001438	0.001447	0.001445	0.001443	Novel proteoforms (BRAKER)	0.00144722
ACOC_0000981501-mRNA-1	0.000973304	0.000869665	0.000921	0.000921	0.000904	0.000916	0.000914	0.000911	Reference proteins (WormBase)	0.000916246
ACOC_0001035201-mRNA-1	0.000594291	NA	NA	NA	NA	NA	NA	NA	Reference proteoforms (WormBase)	0.000594291
ACOC_0001277901-mRNA-1	0.000373797	0.000315145	0.000344	0.000344	0.000335	0.000341	0.00034	0.000339	Reference proteoforms (WormBase)	0.000341493
MSTRG.12490.1	0.00031337	0.000264257	0.000289	0.000289	0.000281	0.000286	0.000285	0.000284	Novel proteoforms (BRAKER)	0.000286453
ACOC_0000452301-mRNA-1	0.00117224	0.00109268	0.001132	0.001132	0.001119	0.001128	0.001127	0.001125	Reference proteins (WormBase)	0.00112849
ACOC_0000547101-mRNA-1	0.00156251	0.00140891	0.001486	0.001486	0.00146	0.001477	0.001474	0.001471	Reference proteoforms (WormBase)	0.00147818
ACOC_0000713901-mRNA-1	0.000102238	0.000117187	0.00011	0.00011	0.000112	0.000111	0.000111	0.000111	Reference proteoforms (WormBase)	0.000110553
MSTRG.5680.1	5.78e-05	4.71333e-05	5.2e-05	5.2e-05	5.1e-05	5.2e-05	5.2e-05	5.1e-05	Novel proteoforms (BRAKER)	5.18667e-05
MSTRG.6894.2	5.81667e-05	4.12667e-05	5e-05	5e-05	4.7e-05	4.9e-05	4.8e-05	4.8e-05	Novel proteoforms (BRAKER)	4.89292e-05
ACOC_0000441801-mRNA-1	0.000142378	0.000154094	0.000148	0.000148	0.00015	0.000149	0.000149	0.000149	Reference proteins (WormBase)	0.000148684
ACOC_0000766801-mRNA-1	0.0013218	0.00181774	0.00157	0.00157	0.001652	0.001597	0.001607	0.001619	Reference proteins (WormBase)	0.00159432
ACOC_0000845101-mRNA-1	0.00312717	0.00390435	0.003516	0.003516	0.003645	0.003559	0.003573	0.003593	Reference proteins (WormBase)	0.00355419
ACOC_0001103401-mRNA-1	0.00381348	0.0028344	0.003324	0.003324	0.003161	0.00327	0.003251	0.003227	Reference proteins (WormBase)	0.00327561
MSTRG.9235.1	0.000151526	8.73e-05	0.000119	0.000119	0.000109	0.000116	0.000115	0.000113	Novel proteoforms (BRAKER)	0.000116228
ACOC_0000532401-mRNA-1	0.000589992	0.000496248	0.000543	0.000543	0.000527	0.000538	0.000536	0.000534	Reference proteins (WormBase)	0.000538405
ACOC_0000144301-mRNA-1	0.000713308	0.000640884	0.000677	0.000677	0.000665	0.000673	0.000672	0.00067	Reference proteins (WormBase)	0.000673524
ACOC_0000235901-mRNA-1	0.000419113	0.000390957	0.000405	0.000405	0.0004	0.000403	0.000403	0.000402	Proteins from split genes (WormBase)	0.000403509
MSTRG.11128.1	0.000353152	0.000267166	0.00031	0.00031	0.000296	0.000305	0.000304	0.000302	Novel proteoforms (BRAKER)	0.000305915
MSTRG.3755.1	0.00241026	0.00212732	0.002269	0.002269	0.002222	0.002253	0.002248	0.002241	Novel proteoforms (BRAKER)	0.00225495
ACOC_0000988301-mRNA-1	0.0025028	0.00230618	0.002404	0.002404	0.002372	0.002394	0.00239	0.002385	Reference proteins (WormBase)	0.00239475
ACOC_0000560901-mRNA-1	0.00100463	0.00102355	0.001014	0.001014	0.001017	0.001015	0.001015	0.001016	Reference proteoforms (WormBase)	0.0010149
ACOC_0001222501-mRNA-1	0.000739067	0.000660496	0.0007	0.0007	0.000687	0.000695	0.000694	0.000692	Reference proteins (WormBase)	0.000695945
MSTRG.4322.1	4.31333e-05	5.8e-05	5.1e-05	5.1e-05	5.3e-05	5.1e-05	5.2e-05	5.2e-05	Novel proteoforms (BRAKER)	5.13917e-05
ACOC_0000961301-mRNA-1	0.000158239	0.000169932	0.000164	0.000164	0.000166	0.000165	0.000165	0.000165	Reference proteins (WormBase)	0.000164646
MSTRG.7548.1	9.53e-05	NA	NA	NA	NA	NA	NA	NA	Novel proteoforms (BRAKER)	9.53e-05
ACOC_0001331401-mRNA-1	0.000156417	0.000112109	0.000134	0.000134	0.000127	0.000132	0.000131	0.00013	Reference proteins (WormBase)	0.000132066
MSTRG.2358.1	0.000401067	0.000313529	0.000357	0.000357	0.000343	0.000352	0.000351	0.000349	Novel proteoforms (BRAKER)	0.00035295
MSTRG.967.1	8.8292e-05	9.3431e-05	9.1e-05	9.1e-05	9.2e-05	9.1e-05	9.1e-05	9.1e-05	Novel proteoforms (BRAKER)	9.10904e-05
MSTRG.1026.1	NA	NA	NA	NA	NA	NA	NA	NA	Novel proteoforms (BRAKER)	#DIV/0!
MSTRG.747.1	0.000438672	0.000357608	0.000398	0.000398	0.000385	0.000394	0.000392	0.00039	Proteins from merged genes (BRAKER)	0.00039416
ACOC_0000634101-mRNA-1	0.000333128	0.000276454	0.000305	0.000305	0.000295	0.000302	0.000301	0.000299	Reference proteins (WormBase)	0.000302073
ACOC_0000961201-mRNA-1	0.000468088	0.000710812	0.000589	0.000589	0.00063	0.000603	0.000607	0.000613	Reference proteins (WormBase)	0.000601237
MSTRG.3334.1	NA	NA	NA	NA	NA	NA	NA	NA	Novel proteoforms (BRAKER)	#DIV/0!
ACOC_0000601601-mRNA-1	NA	0.000167233	NA	NA	NA	NA	NA	NA	Reference proteins (WormBase)	0.000167233
ACOC_0001295001-mRNA-1	0.00116917	0.000401805	0.000785	0.000785	0.000658	0.000743	0.000729	0.00071	Reference proteoforms (WormBase)	0.000747622
MSTRG.7136.1	5.22e-05	6.05667e-05	5.6e-05	5.6e-05	5.8e-05	5.7e-05	5.7e-05	5.7e-05	Novel proteoforms (BRAKER)	5.67208e-05
ACOC_0000334301-mRNA-1	0.000311022	0.000410212	0.000361	0.000361	0.000377	0.000366	0.000368	0.00037	Reference proteins (WormBase)	0.000365529
MSTRG.4134.1	0.000247041	0.000185523	0.000216	0.000216	0.000206	0.000213	0.000212	0.00021	Novel proteins (BRAKER)	0.000213196
ACOC_0001139901-mRNA-1	NA	NA	NA	NA	NA	NA	NA	NA	Reference proteoforms (WormBase)	#DIV/0!
ACOC_0000336701-mRNA-1	NA	NA	NA	NA	NA	NA	NA	NA	Reference proteoforms (WormBase)	#DIV/0!
MSTRG.10749.1	5.885e-05	3.38e-05	4.6e-05	4.6e-05	4.2e-05	4.5e-05	4.4e-05	4.4e-05	Proteins from merged genes (BRAKER)	4.49562e-05
MSTRG.8393.1	0.000799407	0.00108254	0.000941	0.000941	0.000988	0.000957	0.000962	0.000969	Novel proteoforms (BRAKER)	0.000954994
MSTRG.10260.1	NA	NA	NA	NA	NA	NA	NA	NA	Proteins from merged genes (BRAKER)	#DIV/0!
MSTRG.8032.1	4.05333e-05	NA	NA	NA	NA	NA	NA	NA	Novel proteoforms (BRAKER)	4.05333e-05
ACOC_0001158401-mRNA-1	1.2e-05	1.14e-05	1.2e-05	1.2e-05	1.2e-05	1.2e-05	1.2e-05	1.2e-05	Reference proteoforms (WormBase)	1.1925e-05
MSTRG.1564.1	1.0095e-05	1.39e-05	1.2e-05	1.2e-05	1.3e-05	1.2e-05	1.2e-05	1.2e-05	Novel proteoforms (BRAKER)	1.21244e-05
MSTRG.8826.1	2.09333e-05	3.09e-05	2.6e-05	2.6e-05	2.8e-05	2.6e-05	2.7e-05	2.7e-05	Novel proteoforms (BRAKER)	2.64792e-05
MSTRG.380.1	0.000411501	0.00137531	0.000893	0.000893	0.001054	0.000947	0.000965	0.000989	Novel proteoforms (BRAKER)	0.000940977
MSTRG.1264.2	1.405e-05	2.398e-05	1.9e-05	1.9e-05	2.1e-05	2e-05	2e-05	2e-05	Novel proteoforms (BRAKER)	1.96288e-05
MSTRG.2162.1	8.01e-05	3.56e-06	4.2e-05	4.2e-05	2.9e-05	3.8e-05	3.6e-05	3.4e-05	Novel proteoforms (BRAKER)	3.80825e-05
ACOC_0000434501-mRNA-1	0.000416148	0.00038913	0.000403	0.000403	0.000398	0.000401	0.000401	0.0004	Reference proteins (WormBase)	0.00040141
ACOC_0000818601-mRNA-1	0.000357068	9.17017e-05	0.000224	0.000224	0.00018	0.00021	0.000205	0.000198	Reference proteins (WormBase)	0.000211221
MSTRG.1162.1	6.89e-05	NA	NA	NA	NA	NA	NA	NA	Novel proteoforms (BRAKER)	6.89e-05
MSTRG.7135.1	6.59e-05	6.55e-05	6.6e-05	6.6e-05	6.6e-05	6.6e-05	6.6e-05	6.6e-05	Novel proteoforms (BRAKER)	6.5925e-05
MSTRG.8987.1	NA	NA	NA	NA	NA	NA	NA	NA	Novel proteoforms (BRAKER)	#DIV/0!
MSTRG.8772.2	0.000171877	0.000133184	0.000153	0.000153	0.000146	0.00015	0.00015	0.000149	Proteins from merged genes (BRAKER)	0.000150758
ACOC_0000051601-mRNA-1	0.000228202	0.00033309	0.000281	0.000281	0.000298	0.000286	0.000288	0.000291	Reference proteins (WormBase)	0.000285787
MSTRG.4360.1	0.000197328	0.000190264	0.000194	0.000194	0.000193	0.000193	0.000193	0.000193	Novel proteoforms (BRAKER)	0.000193449
MSTRG.37.1	NA	0.000119582	NA	NA	NA	NA	NA	NA	Novel proteoforms (BRAKER)	0.000119582
ACOC_0000545701-mRNA-1	0.000108074	0.000137043	0.000123	0.000123	0.000127	0.000124	0.000125	0.000125	Reference proteins (WormBase)	0.000124015
MSTRG.9622.1	1.3385e-05	8.495e-06	1.1e-05	1.1e-05	1e-05	1.1e-05	1.1e-05	1e-05	Novel proteoforms (BRAKER)	1.0735e-05
MSTRG.8849.1	NA	9.62e-05	NA	NA	NA	NA	NA	NA	Novel proteoforms (BRAKER)	9.62e-05
ACOC_0001266101-mRNA-1	8.34e-05	NA	NA	NA	NA	NA	NA	NA	Reference proteoforms (WormBase)	8.34e-05
ACOC_0000345601-mRNA-1	0.000220031	0.000185577	0.000203	0.000203	0.000197	0.000201	0.0002	0.000199	Reference proteins (WormBase)	0.000201076
MSTRG.7230.1	NA	NA	NA	NA	NA	NA	NA	NA	Novel proteoforms (BRAKER)	#DIV/0!
MSTRG.6353.1	0.00105786	0.00118089	0.001119	0.001119	0.00114	0.001126	0.001128	0.001132	Novel proteoforms (BRAKER)	0.00112534
MSTRG.6353.3	NA	7.83e-05	NA	NA	NA	NA	NA	NA	Novel proteoforms (BRAKER)	7.83e-05
MSTRG.1347.1	1.27167e-05	2.18333e-05	1.7e-05	1.7e-05	1.9e-05	1.8e-05	1.8e-05	1.8e-05	Novel proteoforms (BRAKER)	1.76937e-05
MSTRG.477.1	0.00028711	0.000163501	0.000225	0.000225	0.000205	0.000218	0.000216	0.000213	Novel proteoforms (BRAKER)	0.000219076
MSTRG.12545.1	0.00020999	0.000311281	0.000261	0.000261	0.000278	0.000266	0.000268	0.000271	Novel proteoforms (BRAKER)	0.000265784
MSTRG.10865.1	5.59333e-05	0.000104675	8e-05	8e-05	8.8e-05	8.3e-05	8.4e-05	8.5e-05	Novel proteoforms (BRAKER)	8.2576e-05
MSTRG.7694.1	NA	NA	NA	NA	NA	NA	NA	NA	Novel proteoforms (BRAKER)	#DIV/0!
MSTRG.2033.1	NA	0.00019778	NA	NA	NA	NA	NA	NA	Proteins from merged genes (BRAKER)	0.00019778
MSTRG.70.3	6.23e-06	7.5e-06	7e-06	7e-06	7e-06	7e-06	7e-06	7e-06	Novel proteoforms (BRAKER)	6.96625e-06
MSTRG.6327.2	NA	NA	NA	NA	NA	NA	NA	NA	Proteins from merged genes (BRAKER)	#DIV/0!
MSTRG.6327.1	2.16e-05	9.91e-06	1.6e-05	1.6e-05	1.4e-05	1.5e-05	1.5e-05	1.5e-05	Proteins from merged genes (BRAKER)	1.53137e-05
MSTRG.1614.1	0.00168576	0.00132313	0.001504	0.001504	0.001444	0.001484	0.001478	0.001469	Novel proteoforms (BRAKER)	0.00148649
MSTRG.9079.1	0.000304828	0.00016341	0.000234	0.000234	0.000211	0.000226	0.000224	0.00022	Novel proteoforms (BRAKER)	0.000227155
MSTRG.11017.1	NA	NA	NA	NA	NA	NA	NA	NA	Novel proteoforms (BRAKER)	#DIV/0!
MSTRG.11930.4	7.94e-05	5.44e-05	6.7e-05	6.7e-05	6.3e-05	6.6e-05	6.5e-05	6.4e-05	Novel proteoforms (BRAKER)	6.5725e-05
MSTRG.6417.1	NA	NA	NA	NA	NA	NA	NA	NA	Novel proteoforms (BRAKER)	#DIV/0!
MSTRG.10615.1	0.000397883	0.000348239	0.000373	0.000373	0.000365	0.00037	0.000369	0.000368	Proteins from merged genes (BRAKER)	0.000370515
MSTRG.3267.3	0.000203787	0.000137334	0.000171	0.000171	0.000159	0.000167	0.000166	0.000164	Novel proteoforms (BRAKER)	0.00016739
ACOC_0000187501-mRNA-1	0.00127385	3.95e-05	0.000657	0.000657	0.000451	0.000588	0.000565	0.000535	Reference proteins (WormBase)	0.000595794
MSTRG.9373.2	7.5405e-05	9.58e-06	4.2e-05	4.2e-05	3.2e-05	3.9e-05	3.8e-05	3.6e-05	Proteins from merged genes (BRAKER)	3.92481e-05
MSTRG.11003.1	NA	NA	NA	NA	NA	NA	NA	NA	Novel proteoforms (BRAKER)	#DIV/0!
ACOC_0000805901-mRNA-1	NA	NA	NA	NA	NA	NA	NA	NA	Proteins from split genes (WormBase)	#DIV/0!
MSTRG.7934.1	0.00011527	9.8274e-05	0.000107	0.000107	0.000104	0.000106	0.000106	0.000105	Proteins from merged genes (BRAKER)	0.000106068
MSTRG.12024.1	NA	1.08e-05	NA	NA	NA	NA	NA	NA	Novel proteoforms (BRAKER)	1.08e-05
MSTRG.8149.1	2.04e-05	1.69133e-05	1.9e-05	1.9e-05	1.8e-05	1.8e-05	1.8e-05	1.8e-05	Proteins from merged genes (BRAKER)	1.84142e-05
MSTRG.5893.2	4.89e-05	4.16667e-05	4.5e-05	4.5e-05	4.4e-05	4.5e-05	4.5e-05	4.5e-05	Proteins from merged genes (BRAKER)	4.49458e-05
MSTRG.9328.3	0.000178373	0.000168445	0.000173	0.000173	0.000172	0.000173	0.000173	0.000172	Novel proteoforms (BRAKER)	0.000172852
MSTRG.7526.1	NA	NA	NA	NA	NA	NA	NA	NA	Novel proteoforms (BRAKER)	#DIV/0!
ACOC_0000615701-mRNA-1	1.64e-05	NA	NA	NA	NA	NA	NA	NA	Reference proteoforms (WormBase)	1.64e-05
MSTRG.998.1	1.09e-05	NA	NA	NA	NA	NA	NA	NA	Novel proteoforms (BRAKER)	1.09e-05
MSTRG.9941.1	0.000302945	0.000283473	0.000293	0.000293	0.00029	0.000292	0.000292	0.000291	Novel proteoforms (BRAKER)	0.000292177
MSTRG.3169.1	0.00060046	0.000413202	0.000507	0.000507	0.000476	0.000496	0.000493	0.000488	Novel proteins (BRAKER)	0.000497583
MSTRG.12568.1	NA	0.000235496	NA	NA	NA	NA	NA	NA	Novel proteins (BRAKER)	0.000235496
MSTRG.6295.1	3.76e-05	2.95333e-05	3.4e-05	3.4e-05	3.2e-05	3.3e-05	3.3e-05	3.3e-05	Proteins from merged genes (BRAKER)	3.32667e-05
MSTRG.7664.1	5.74e-06	7.62e-06	7e-06	7e-06	7e-06	7e-06	7e-06	7e-06	Novel proteoforms (BRAKER)	6.92e-06
MSTRG.10558.1	4.5e-06	1.37e-06	3e-06	3e-06	2e-06	3e-06	3e-06	3e-06	Novel proteoforms (BRAKER)	2.85875e-06
MSTRG.2613.1	0.00104939	0.00109429	0.001072	0.001072	0.001079	0.001074	0.001075	0.001076	Novel proteoforms (BRAKER)	0.00107396
ACOC_0000927201-mRNA-1	0.000143579	0.000154819	0.000149	0.000149	0.000151	0.00015	0.00015	0.00015	Reference proteins (WormBase)	0.000149675
MSTRG.10326.1	0.000144669	0.000134896	0.00014	0.00014	0.000138	0.000139	0.000139	0.000139	Novel proteoforms (BRAKER)	0.000139321
MSTRG.11925.1	0.00110788	0.000913078	0.00101	0.00101	0.000978	0.001	0.000996	0.000991	Novel proteoforms (BRAKER)	0.00100074
ACOC_0001229001-mRNA-1	3.13e-05	4.04333e-05	3.6e-05	3.6e-05	3.7e-05	3.6e-05	3.7e-05	3.7e-05	Reference proteins (WormBase)	3.63417e-05
MSTRG.3742.1	NA	0.000102091	NA	NA	NA	NA	NA	NA	Novel proteoforms (BRAKER)	0.000102091
MSTRG.1872.1	2.97667e-05	1.54667e-05	2.3e-05	2.3e-05	2e-05	2.2e-05	2.2e-05	2.1e-05	Novel proteoforms (BRAKER)	2.20292e-05
ACOC_0000582701-mRNA-1	5.14667e-05	5.66e-05	5.4e-05	5.4e-05	5.5e-05	5.4e-05	5.4e-05	5.5e-05	Reference proteoforms (WormBase)	5.42583e-05
MSTRG.157.1	4.65e-05	NA	NA	NA	NA	NA	NA	NA	Proteins from merged genes (BRAKER)	4.65e-05
MSTRG.1403.1	0.00030575	0.000147791	0.000227	0.000227	0.0002	0.000218	0.000215	0.000211	Novel proteoforms (BRAKER)	0.000218943
ACOC_0001168101-mRNA-1	6.88e-05	0.000137684	0.000103	0.000103	0.000115	0.000107	0.000108	0.00011	Reference proteins (WormBase)	0.000106561
MSTRG.7103.1	0.00028383	NA	NA	NA	NA	NA	NA	NA	Novel proteins (BRAKER)	0.00028383
MSTRG.1892.1	1.51333e-05	2.06667e-05	1.8e-05	1.8e-05	1.9e-05	1.8e-05	1.8e-05	1.8e-05	Novel proteins (BRAKER)	1.81e-05
ACOC_0001001801-mRNA-1	0.00101837	0.00107418	0.001046	0.001046	0.001056	0.001049	0.00105	0.001052	Reference proteins (WormBase)	0.00104894
ACOC_0000967601-mRNA-1	3.175e-05	3.255e-05	3.2e-05	3.2e-05	3.2e-05	3.2e-05	3.2e-05	3.2e-05	Reference proteins (WormBase)	3.20375e-05
ACOC_0000485301-mRNA-1	0.000230839	0.000155268	0.000193	0.000193	0.00018	0.000189	0.000187	0.000186	Reference proteins (WormBase)	0.000189263
ACOC_0000678001-mRNA-1	NA	NA	NA	NA	NA	NA	NA	NA	Reference proteoforms (WormBase)	#DIV/0!
MSTRG.9208.1	0.000224768	0.000231194	0.000228	0.000228	0.000229	0.000228	0.000228	0.000229	Novel proteins (BRAKER)	0.000228245
MSTRG.7547.1	0.00020386	0.000167352	0.000186	0.000186	0.00018	0.000184	0.000183	0.000182	Novel proteoforms (BRAKER)	0.000184027
MSTRG.7210.1	0.0108999	0.0125602	0.01173	0.01173	0.012007	0.011822	0.011853	0.011894	Novel proteoforms (BRAKER)	0.011812
MSTRG.12053.1	0.00153484	5.28e-05	0.000794	0.000794	0.000547	0.000711	0.000684	0.000647	Novel proteoforms (BRAKER)	0.00072058
MSTRG.354.1	1.84667e-05	2.065e-05	2e-05	2e-05	2e-05	2e-05	2e-05	2e-05	Novel proteoforms (BRAKER)	1.98896e-05
ACOC_0000236601-mRNA-1	0.000373699	0.000280542	0.000327	0.000327	0.000312	0.000322	0.00032	0.000318	Reference proteins (WormBase)	0.00032253
ACOC_0000445301-mRNA-1	4.46e-05	8.5277e-05	6.5e-05	6.5e-05	7.2e-05	6.7e-05	6.8e-05	6.9e-05	Reference proteins (WormBase)	6.69846e-05
MSTRG.9243.1	1.10833e-05	1.81533e-05	1.5e-05	1.5e-05	1.6e-05	1.5e-05	1.5e-05	1.5e-05	Novel proteoforms (BRAKER)	1.50296e-05
MSTRG.1037.1	3.39667e-05	2.10333e-05	2.8e-05	2.8e-05	2.5e-05	2.7e-05	2.7e-05	2.6e-05	Novel proteoforms (BRAKER)	2.7e-05
MSTRG.10127.1	NA	2.15e-05	NA	NA	NA	NA	NA	NA	Novel proteoforms (BRAKER)	2.15e-05
ACOC_0000932201-mRNA-1	0.00106221	0.000836447	0.000949	0.000949	0.000912	0.000937	0.000933	0.000927	Reference proteins (WormBase)	0.000938207
MSTRG.7987.1	0.00022571	0.00020977	0.000218	0.000218	0.000215	0.000217	0.000217	0.000216	Novel proteins (BRAKER)	0.00021706
MSTRG.8294.1	8.9015e-06	1.339e-05	1.1e-05	1.1e-05	1.2e-05	1.1e-05	1.1e-05	1.2e-05	Novel proteoforms (BRAKER)	1.12864e-05
MSTRG.6925.1	2.95e-05	NA	NA	NA	NA	NA	NA	NA	Novel proteoforms (BRAKER)	2.95e-05
MSTRG.5550.2	6.09e-06	NA	NA	NA	NA	NA	NA	NA	Proteins from merged genes (BRAKER)	6.09e-06
MSTRG.605.1	1.099e-05	8.68333e-06	1e-05	1e-05	9e-06	1e-05	1e-05	1e-05	Novel proteoforms (BRAKER)	9.83417e-06
ACOC_0000479801-mRNA-1	8.6318e-05	NA	NA	NA	NA	NA	NA	NA	Reference proteins (WormBase)	8.6318e-05
MSTRG.11266.1	0.000168329	0.000117943	0.000143	0.000143	0.000135	0.00014	0.000139	0.000138	Novel proteoforms (BRAKER)	0.000140534
MSTRG.893.1	NA	3.5e-05	NA	NA	NA	NA	NA	NA	Novel proteoforms (BRAKER)	3.5e-05
MSTRG.8895.1	5.97667e-05	3.94333e-05	5e-05	5e-05	4.6e-05	4.8e-05	4.8e-05	4.8e-05	Novel proteoforms (BRAKER)	4.865e-05
MSTRG.3477.1	NA	NA	NA	NA	NA	NA	NA	NA	Novel proteoforms (BRAKER)	#DIV/0!
MSTRG.7954.1	6.925e-05	9.1616e-05	8e-05	8e-05	8.4e-05	8.2e-05	8.2e-05	8.3e-05	Novel proteoforms (BRAKER)	8.14832e-05
MSTRG.622.3	0.000185857	0.000110896	0.000148	0.000148	0.000136	0.000144	0.000143	0.000141	Novel proteoforms (BRAKER)	0.000144594
ACOC_0000091701-mRNA-1	0.00323149	0.00427433	0.003753	0.003753	0.003927	0.003811	0.00383	0.003856	Reference proteins (WormBase)	0.00380448
ACOC_0000565701-mRNA-1	0.000411469	0.000403569	0.000408	0.000408	0.000406	0.000407	0.000407	0.000407	Reference proteins (WormBase)	0.000407255
MSTRG.2751.1	0.000128321	0.0001727	0.000151	0.000151	0.000158	0.000153	0.000154	0.000155	Novel proteoforms (BRAKER)	0.000152878
ACOC_0000989901-mRNA-1	3.98333e-06	2.26333e-06	3e-06	3e-06	3e-06	3e-06	3e-06	3e-06	Reference proteoforms (WormBase)	3.03083e-06
ACOC_0000015501-mRNA-1	0.000414491	0.000388794	0.000402	0.000402	0.000397	0.0004	0.0004	0.000399	Reference proteins (WormBase)	0.000400411
ACOC_0000505301-mRNA-1	0.000124449	0.000118769	0.000122	0.000122	0.000121	0.000121	0.000121	0.000121	Reference proteins (WormBase)	0.000121402
MSTRG.2633.1	NA	3.335e-05	NA	NA	NA	NA	NA	NA	Proteins from merged genes (BRAKER)	3.335e-05
MSTRG.13.1	NA	NA	NA	NA	NA	NA	NA	NA	Novel proteoforms (BRAKER)	#DIV/0!
ACOC_0001323101-mRNA-1	2.015e-05	1.76333e-05	1.9e-05	1.9e-05	1.8e-05	1.9e-05	1.9e-05	1.9e-05	Reference proteins (WormBase)	1.88479e-05
MSTRG.7659.1	NA	4.31e-05	NA	NA	NA	NA	NA	NA	Novel proteoforms (BRAKER)	4.31e-05
MSTRG.9383.4	0.00129132	0.00199294	0.001642	0.001642	0.001759	0.001681	0.001694	0.001711	Proteins from merged genes (BRAKER)	0.00167666
MSTRG.8400.1	1.62e-05	NA	NA	NA	NA	NA	NA	NA	Novel proteoforms (BRAKER)	1.62e-05
MSTRG.11898.1	1.65667e-05	2.76e-06	1e-05	1e-05	7e-06	9e-06	9e-06	8e-06	Proteins from merged genes (BRAKER)	9.04084e-06
MSTRG.1532.1	NA	NA	NA	NA	NA	NA	NA	NA	Novel proteoforms (BRAKER)	#DIV/0!
ACOC_0001115501-mRNA-1	1.54933e-05	1.68333e-05	1.6e-05	1.6e-05	1.6e-05	1.6e-05	1.6e-05	1.6e-05	Reference proteoforms (WormBase)	1.60408e-05
MSTRG.2410.1	NA	NA	NA	NA	NA	NA	NA	NA	Novel proteoforms (BRAKER)	#DIV/0!
ACOC_0001242601-mRNA-1	5.4e-05	3.55e-05	4.5e-05	4.5e-05	4.2e-05	4.4e-05	4.3e-05	4.3e-05	Reference proteoforms (WormBase)	4.39375e-05
MSTRG.12130.3	8.07e-05	7.96e-05	8e-05	8e-05	8e-05	8e-05	8e-05	8e-05	Novel proteoforms (BRAKER)	8.00375e-05
MSTRG.12923.1	0.000146369	9.2401e-05	0.000119	0.000119	0.00011	0.000116	0.000115	0.000114	Novel proteoforms (BRAKER)	0.000116471
MSTRG.6064.1	1.28e-05	1.194e-05	1.2e-05	1.2e-05	1.2e-05	1.2e-05	1.2e-05	1.2e-05	Novel proteoforms (BRAKER)	1.20925e-05
MSTRG.11501.2	4.58e-06	4.29e-06	4e-06	4e-06	4e-06	4e-06	4e-06	4e-06	Novel proteoforms (BRAKER)	4.10875e-06
MSTRG.9964.1	0.00155532	0.00184943	0.001702	0.001702	0.001751	0.001719	0.001724	0.001731	Novel proteoforms (BRAKER)	0.00171672
ACOC_0000747401-mRNA-1	0.000150843	0.000163668	0.000157	0.000157	0.000159	0.000158	0.000158	0.000159	Reference proteins (WormBase)	0.000157814
MSTRG.8019.1	NA	NA	NA	NA	NA	NA	NA	NA	Novel proteoforms (BRAKER)	#DIV/0!
ACOC_0000267901-mRNA-1	7.05333e-05	NA	NA	NA	NA	NA	NA	NA	Reference proteins (WormBase)	7.05333e-05
ACOC_0000283201-mRNA-1	NA	NA	NA	NA	NA	NA	NA	NA	Reference proteins (WormBase)	#DIV/0!
ACOC_0000791601-mRNA-1	3.705e-05	0.000125442	8.1e-05	8.1e-05	9.6e-05	8.6e-05	8.8e-05	9e-05	Reference proteins (WormBase)	8.55615e-05
MSTRG.3062.1	NA	NA	NA	NA	NA	NA	NA	NA	Novel proteoforms (BRAKER)	#DIV/0!
MSTRG.4733.3	NA	NA	NA	NA	NA	NA	NA	NA	Proteins from merged genes (BRAKER)	#DIV/0!
ACOC_0000181101-mRNA-1	NA	NA	NA	NA	NA	NA	NA	NA	Reference proteoforms (WormBase)	#DIV/0!
MSTRG.72.2	2.04667e-05	2.23333e-05	2.1e-05	2.1e-05	2.2e-05	2.2e-05	2.2e-05	2.2e-05	Novel proteoforms (BRAKER)	2.16e-05
MSTRG.5471.1	9.89e-06	8.95e-06	9e-06	9e-06	9e-06	9e-06	9e-06	9e-06	Novel proteoforms (BRAKER)	9.105e-06
MSTRG.6182.1	NA	3.73e-05	NA	NA	NA	NA	NA	NA	Novel proteoforms (BRAKER)	3.73e-05
MSTRG.583.2	1.36667e-05	1.699e-05	1.5e-05	1.5e-05	1.6e-05	1.6e-05	1.6e-05	1.6e-05	Novel proteoforms (BRAKER)	1.55821e-05
MSTRG.337.2	7.51e-06	0.000149901	7.9e-05	7.9e-05	0.000102	8.7e-05	8.9e-05	9.3e-05	Novel proteoforms (BRAKER)	8.58014e-05
ACOC_0000443501-mRNA-1	0.000469863	2.70667e-05	0.000248	0.000248	0.000175	0.000224	0.000216	0.000205	Reference proteoforms (WormBase)	0.000226616
MSTRG.11131.1	4.16333e-06	3.36e-06	4e-06	4e-06	4e-06	4e-06	4e-06	4e-06	Novel proteoforms (BRAKER)	3.94042e-06
MSTRG.11147.1	NA	NA	NA	NA	NA	NA	NA	NA	Proteins from merged genes (BRAKER)	#DIV/0!
ACOC_0001034301-mRNA-1	NA	NA	NA	NA	NA	NA	NA	NA	Reference proteoforms (WormBase)	#DIV/0!
MSTRG.4593.1	1.12e-05	NA	NA	NA	NA	NA	NA	NA	Novel proteoforms (BRAKER)	1.12e-05
MSTRG.10548.1	0.000124673	0.000198344	0.000162	0.000162	0.000174	0.000166	0.000167	0.000169	Novel proteins (BRAKER)	0.000165377
MSTRG.321.1	8.01023e-05	5.2e-05	6.6e-05	6.6e-05	6.1e-05	6.4e-05	6.4e-05	6.3e-05	Novel proteoforms (BRAKER)	6.45128e-05
MSTRG.2321.1	8.67e-06	1.29e-05	1.1e-05	1.1e-05	1.1e-05	1.1e-05	1.1e-05	1.1e-05	Novel proteoforms (BRAKER)	1.09462e-05
MSTRG.5092.1	5.195e-06	NA	NA	NA	NA	NA	NA	NA	Novel proteoforms (BRAKER)	5.195e-06
MSTRG.8189.1	0.00028963	0.000303149	0.000296	0.000296	0.000299	0.000297	0.000297	0.000298	Novel proteoforms (BRAKER)	0.000296972
ACOC_0001197001-mRNA-1	2.53333e-05	3.30333e-05	2.9e-05	2.9e-05	3e-05	3e-05	3e-05	3e-05	Reference proteins (WormBase)	2.95458e-05
ACOC_0001237801-mRNA-1	0.000456738	0.00042602	0.000441	0.000441	0.000436	0.00044	0.000439	0.000438	Reference proteoforms (WormBase)	0.00043972
MSTRG.12994.1	0.000680314	0.000808218	0.000744	0.000744	0.000766	0.000751	0.000754	0.000757	Novel proteins (BRAKER)	0.000750566
MSTRG.7394.2	7.17333e-06	1.51e-06	4e-06	4e-06	3e-06	4e-06	4e-06	4e-06	Novel proteoforms (BRAKER)	3.96042e-06
MSTRG.2109.1	2.605e-06	4.87e-06	4e-06	4e-06	4e-06	4e-06	4e-06	4e-06	Novel proteoforms (BRAKER)	3.93437e-06
MSTRG.7225.1	2.38e-05	NA	NA	NA	NA	NA	NA	NA	Novel proteoforms (BRAKER)	2.38e-05
MSTRG.11955.1	7.49667e-06	8.83e-06	8e-06	8e-06	8e-06	8e-06	8e-06	8e-06	Novel proteoforms (BRAKER)	8.04083e-06
MSTRG.6340.1	4.485e-05	2.38e-05	3.4e-05	3.4e-05	3.1e-05	3.3e-05	3.3e-05	3.2e-05	Novel proteoforms (BRAKER)	3.32062e-05
MSTRG.5689.1	5.35e-06	NA	NA	NA	NA	NA	NA	NA	Proteins from merged genes (BRAKER)	5.35e-06
MSTRG.5578.1	6.14333e-06	1.9e-07	3e-06	3e-06	2e-06	3e-06	3e-06	3e-06	Novel proteoforms (BRAKER)	2.91667e-06
ACOC_0000485001-mRNA-1	0.00145451	0.00132242	0.001388	0.001388	0.001366	0.001381	0.001379	0.001375	Reference proteins (WormBase)	0.00138174
MSTRG.5771.1	NA	NA	NA	NA	NA	NA	NA	NA	Novel proteoforms (BRAKER)	#DIV/0!
MSTRG.11225.1	NA	NA	NA	NA	NA	NA	NA	NA	Novel proteoforms (BRAKER)	#DIV/0!
MSTRG.1531.1	2.68667e-05	2.087e-05	2.4e-05	2.4e-05	2.3e-05	2.4e-05	2.3e-05	2.3e-05	Novel proteoforms (BRAKER)	2.35921e-05
MSTRG.5261.1	NA	NA	NA	NA	NA	NA	NA	NA	Novel proteoforms (BRAKER)	#DIV/0!
ACOC_0001171401-mRNA-1	2.72e-05	2.77e-05	2.7e-05	2.7e-05	2.8e-05	2.7e-05	2.7e-05	2.7e-05	Reference proteins (WormBase)	2.72375e-05
MSTRG.5016.1	NA	NA	NA	NA	NA	NA	NA	NA	Novel proteoforms (BRAKER)	#DIV/0!
ACOC_0000025801-mRNA-1	0.000105847	6.5121e-05	8.5e-05	8.5e-05	7.9e-05	8.3e-05	8.2e-05	8.1e-05	Proteins from split genes (WormBase)	8.3246e-05
MSTRG.5963.2	8.45e-06	NA	NA	NA	NA	NA	NA	NA	Novel proteoforms (BRAKER)	8.45e-06
MSTRG.5693.4	NA	1.49e-05	NA	NA	NA	NA	NA	NA	Proteins from merged genes (BRAKER)	1.49e-05
MSTRG.12577.4	5.61e-06	8.165e-06	7e-06	7e-06	7e-06	7e-06	7e-06	7e-06	Proteins from merged genes (BRAKER)	6.97188e-06
MSTRG.4717.1	NA	NA	NA	NA	NA	NA	NA	NA	Novel proteoforms (BRAKER)	#DIV/0!
MSTRG.4921.5	1.1595e-05	4.4e-06	8e-06	8e-06	7e-06	8e-06	7e-06	7e-06	Proteins from merged genes (BRAKER)	7.62437e-06
MSTRG.2308.3	4.45e-06	8.67e-06	7e-06	7e-06	7e-06	7e-06	7e-06	7e-06	Novel proteoforms (BRAKER)	6.89e-06
MSTRG.5980.1	7.57e-06	1.12833e-05	9e-06	9e-06	1e-05	1e-05	1e-05	1e-05	Novel proteoforms (BRAKER)	9.60666e-06
MSTRG.8510.1	NA	NA	NA	NA	NA	NA	NA	NA	Novel proteoforms (BRAKER)	#DIV/0!
ACOC_0000418501-mRNA-1	NA	NA	NA	NA	NA	NA	NA	NA	Reference proteins (WormBase)	#DIV/0!
MSTRG.9329.1	0.000149594	0.000122967	0.000136	0.000136	0.000132	0.000135	0.000134	0.000134	Novel proteoforms (BRAKER)	0.000134945
MSTRG.4061.1	0.000109422	9.7404e-05	0.000103	0.000103	0.000101	0.000103	0.000103	0.000102	Novel proteoforms (BRAKER)	0.000102728
MSTRG.2945.1	8.78667e-06	1.21e-05	1e-05	1e-05	1.1e-05	1.1e-05	1.1e-05	1.1e-05	Novel proteoforms (BRAKER)	1.06108e-05
MSTRG.12017.3	NA	NA	NA	NA	NA	NA	NA	NA	Novel proteoforms (BRAKER)	#DIV/0!
MSTRG.9530.1	NA	NA	NA	NA	NA	NA	NA	NA	Novel proteoforms (BRAKER)	#DIV/0!
MSTRG.6287.1	4.32e-07	NA	NA	NA	NA	NA	NA	NA	Novel proteoforms (BRAKER)	4.32e-07
MSTRG.488.1	1.15e-06	8.30667e-07	1e-06	1e-06	1e-06	1e-06	1e-06	1e-06	Proteins from merged genes (BRAKER)	9.97583e-07
MSTRG.12953.1	0.000105363	8.43253e-05	9.5e-05	9.5e-05	9.1e-05	9.4e-05	9.3e-05	9.3e-05	Novel proteins (BRAKER)	9.3836e-05
MSTRG.7883.1	NA	NA	NA	NA	NA	NA	NA	NA	Novel proteoforms (BRAKER)	#DIV/0!
ACOC_0000569801-mRNA-1	1.975e-05	2.06e-05	2e-05	2e-05	2e-05	2e-05	2e-05	2e-05	Reference proteins (WormBase)	2.00437e-05
MSTRG.2357.1	3.27e-05	NA	NA	NA	NA	NA	NA	NA	Novel proteins (BRAKER)	3.27e-05
MSTRG.9290.1	NA	7.97e-06	NA	NA	NA	NA	NA	NA	Novel proteoforms (BRAKER)	7.97e-06
ACOC_0000495701-mRNA-1	NA	NA	NA	NA	NA	NA	NA	NA	Proteins from split genes (WormBase)	#DIV/0!
MSTRG.4783.1	3.665e-06	1.01e-05	7e-06	7e-06	8e-06	7e-06	7e-06	8e-06	Proteins from merged genes (BRAKER)	7.22063e-06
MSTRG.4404.1	8.6e-06	NA	NA	NA	NA	NA	NA	NA	Novel proteoforms (BRAKER)	8.6e-06
MSTRG.6121.1	NA	NA	NA	NA	NA	NA	NA	NA	Novel proteoforms (BRAKER)	#DIV/0!
MSTRG.8487.1	NA	NA	NA	NA	NA	NA	NA	NA	Novel proteoforms (BRAKER)	#DIV/0!
MSTRG.5511.1	3.94e-05	2.46e-05	3.2e-05	3.2e-05	3e-05	3.1e-05	3.1e-05	3.1e-05	Novel proteoforms (BRAKER)	3.1375e-05
MSTRG.4822.1	5.6335e-06	6.065e-06	6e-06	6e-06	6e-06	6e-06	6e-06	6e-06	Novel proteoforms (BRAKER)	5.96231e-06
MSTRG.10794.1	NA	8.95e-07	NA	NA	NA	NA	NA	NA	Novel proteoforms (BRAKER)	8.95e-07
MSTRG.11944.1	NA	1.6e-05	NA	NA	NA	NA	NA	NA	Novel proteoforms (BRAKER)	1.6e-05
ACOC_0000568901-mRNA-1	0.000684291	0.000580426	0.000632	0.000632	0.000615	0.000627	0.000625	0.000622	Proteins from split genes (WormBase)	0.000627215
MSTRG.9758.1	NA	NA	NA	NA	NA	NA	NA	NA	Novel proteins (BRAKER)	#DIV/0!
ACOC_0000715601-mRNA-1	5.52e-05	NA	NA	NA	NA	NA	NA	NA	Reference proteins (WormBase)	5.52e-05
MSTRG.4589.1	NA	NA	NA	NA	NA	NA	NA	NA	Proteins from merged genes (BRAKER)	#DIV/0!
MSTRG.9248.1	NA	2.825e-05	NA	NA	NA	NA	NA	NA	Novel proteoforms (BRAKER)	2.825e-05
MSTRG.8640.1	NA	2.116e-05	NA	NA	NA	NA	NA	NA	Novel proteoforms (BRAKER)	2.116e-05
MSTRG.1670.1	7.81e-07	NA	NA	NA	NA	NA	NA	NA	Novel proteoforms (BRAKER)	7.81e-07
ACOC_0000750301-mRNA-1	4.16e-06	3.38333e-06	4e-06	4e-06	4e-06	4e-06	4e-06	4e-06	Reference proteoforms (WormBase)	3.94292e-06
ACOC_0000850601-mRNA-1	0.000315853	0.000345816	0.000331	0.000331	0.000336	0.000332	0.000333	0.000334	Reference proteoforms (WormBase)	0.000332334
MSTRG.12343.2	2.74e-06	2.54e-06	3e-06	3e-06	3e-06	3e-06	3e-06	3e-06	Novel proteoforms (BRAKER)	2.91e-06
MSTRG.10254.1	9.77667e-06	8.5e-06	9e-06	9e-06	9e-06	9e-06	9e-06	9e-06	Novel proteoforms (BRAKER)	9.03458e-06
MSTRG.661.1	NA	NA	NA	NA	NA	NA	NA	NA	Novel proteoforms (BRAKER)	#DIV/0!
ACOC_0000696401-mRNA-1	NA	NA	NA	NA	NA	NA	NA	NA	Reference proteins (WormBase)	#DIV/0!
MSTRG.7974.1	3.47e-05	NA	NA	NA	NA	NA	NA	NA	Proteins from merged genes (BRAKER)	3.47e-05
MSTRG.6560.1	NA	NA	NA	NA	NA	NA	NA	NA	Novel proteins (BRAKER)	#DIV/0!
MSTRG.7377.6	NA	NA	NA	NA	NA	NA	NA	NA	Proteins from merged genes (BRAKER)	#DIV/0!
ACOC_0001220001-mRNA-1	NA	NA	NA	NA	NA	NA	NA	NA	Reference proteoforms (WormBase)	#DIV/0!
MSTRG.11609.1	NA	NA	NA	NA	NA	NA	NA	NA	Novel proteoforms (BRAKER)	#DIV/0!
ACOC_0000457101-mRNA-1	0.00935841	0.00874564	0.009052	0.009052	0.00895	0.009018	0.009007	0.008992	Reference proteins (WormBase)	0.00902188
ACOC_0001004401-mRNA-1	0.00371086	0.00366693	0.003689	0.003689	0.003682	0.003686	0.003686	0.003685	Reference proteins (WormBase)	0.00368685
MSTRG.11335.1	0.00149735	0.00138163	0.001439	0.001439	0.00142	0.001433	0.001431	0.001428	Proteins from merged genes (BRAKER)	0.00143362
ACOC_0000064501-mRNA-1	0.00225298	0.00235958	0.002306	0.002306	0.002324	0.002312	0.002314	0.002317	Reference proteins (WormBase)	0.00231145
MSTRG.3051.2	0.00155423	0.00200875	0.001781	0.001781	0.001857	0.001807	0.001815	0.001826	Novel proteoforms (BRAKER)	0.00180375
MSTRG.4489.1	0.00276343	0.00235717	0.00256	0.00256	0.002493	0.002538	0.00253	0.00252	Novel proteoforms (BRAKER)	0.0025402
MSTRG.10706.1	0.120328	0.142461	0.131395	0.131395	0.135084	0.132624	0.133034	0.133581	Novel proteoforms (BRAKER)	0.132488
MSTRG.5934.1	NA	NA	NA	NA	NA	NA	NA	NA	Novel proteoforms (BRAKER)	#DIV/0!
MSTRG.6580.1	NA	NA	NA	NA	NA	NA	NA	NA	Novel proteoforms (BRAKER)	#DIV/0!
MSTRG.6538.1	0.0021057	0.00214963	0.002128	0.002128	0.002135	0.00213	0.002131	0.002132	Novel proteoforms (BRAKER)	0.00212992
MSTRG.1214.2	0.000455333	0.000481563	0.000468	0.000468	0.000473	0.00047	0.00047	0.000471	Novel proteoforms (BRAKER)	0.000469612
MSTRG.4625.1	0.039899	0.0432463	0.041573	0.041573	0.042131	0.041759	0.041821	0.041903	Novel proteoforms (BRAKER)	0.0417382
MSTRG.1487.1	1.62667e-05	1.28e-05	1.5e-05	1.5e-05	1.4e-05	1.4e-05	1.4e-05	1.4e-05	Novel proteoforms (BRAKER)	1.43833e-05
MSTRG.7392.1	5.68073e-05	1.80333e-05	3.7e-05	3.7e-05	3.1e-05	3.5e-05	3.5e-05	3.4e-05	Novel proteins (BRAKER)	3.54801e-05
MSTRG.7618.1	5e-05	NA	NA	NA	NA	NA	NA	NA	Novel proteoforms (BRAKER)	5e-05
ACOC_0000738601-mRNA-1	0.0846438	0.075092	0.079868	0.079868	0.078276	0.079337	0.07916	0.078925	Reference proteins (WormBase)	0.0793962
MSTRG.4564.1	NA	NA	NA	NA	NA	NA	NA	NA	Novel proteoforms (BRAKER)	#DIV/0!
ACOC_0001328701-mRNA-1	NA	NA	NA	NA	NA	NA	NA	NA	Reference proteoforms (WormBase)	#DIV/0!
MSTRG.12999.1	0.000116003	0.00027954	0.000198	0.000198	0.000225	0.000207	0.00021	0.000214	Novel proteoforms (BRAKER)	0.000205943
ACOC_0000173601-mRNA-1	0.00694147	0.00525143	0.006096	0.006096	0.005815	0.006003	0.005971	0.00593	Reference proteins (WormBase)	0.00601299
MSTRG.4942.1	5.78667e-05	5.86333e-05	5.8e-05	5.8e-05	5.8e-05	5.8e-05	5.8e-05	5.8e-05	Novel proteoforms (BRAKER)	5.80625e-05
MSTRG.3789.2	0.00605917	0.00490122	0.00548	0.00548	0.005287	0.005416	0.005394	0.005366	Novel proteoforms (BRAKER)	0.00542292
MSTRG.8558.1	NA	0.000104142	NA	NA	NA	NA	NA	NA	Novel proteoforms (BRAKER)	0.000104142
ACOC_0000143601-mRNA-1	0.000456866	0.000533571	0.000495	0.000495	0.000508	0.000499	0.000501	0.000503	Reference proteins (WormBase)	0.00049893
MSTRG.4688.2	0.000944425	0.000922594	0.000934	0.000934	0.00093	0.000932	0.000932	0.000931	Novel proteoforms (BRAKER)	0.000932502
MSTRG.1734.1	0.00670474	0.00655841	0.006632	0.006632	0.006607	0.006623	0.006621	0.006617	Proteins from merged genes (BRAKER)	0.00662439
ACOC_0000182301-mRNA-1	0.00534796	0.00532115	0.005335	0.005335	0.00533	0.005333	0.005333	0.005332	Proteins from split genes (WormBase)	0.00533339
ACOC_0001097301-mRNA-1	0.00188302	0.00183201	0.001858	0.001858	0.001849	0.001855	0.001854	0.001852	Reference proteins (WormBase)	0.00185513
ACOC_0000768901-mRNA-1	0.00154873	0.00165723	0.001603	0.001603	0.001621	0.001609	0.001611	0.001614	Reference proteins (WormBase)	0.00160837
ACOC_0001097201-mRNA-1	0.00894247	0.00866433	0.008803	0.008803	0.008757	0.008788	0.008783	0.008776	Reference proteins (WormBase)	0.0087896
MSTRG.476.1	0.00050798	0.000560887	0.000534	0.000534	0.000543	0.000537	0.000538	0.00054	Novel proteoforms (BRAKER)	0.000536858
ACOC_0000687501-mRNA-1	NA	0.000149269	NA	NA	NA	NA	NA	NA	Proteins from split genes (WormBase)	0.000149269
MSTRG.578.1	0.000127668	0.000124825	0.000126	0.000126	0.000126	0.000126	0.000126	0.000126	Novel proteoforms (BRAKER)	0.000126062
MSTRG.9280.1	0.000494926	0.000424944	0.00046	0.00046	0.000448	0.000456	0.000455	0.000453	Novel proteoforms (BRAKER)	0.000456484
MSTRG.7928.1	NA	NA	NA	NA	NA	NA	NA	NA	Novel proteoforms (BRAKER)	#DIV/0!
ACOC_0000805401-mRNA-1	0.000575835	0.000277152	0.000426	0.000426	0.000377	0.00041	0.000404	0.000397	Reference proteoforms (WormBase)	0.000411623
MSTRG.7928.3	0.000649956	0.000667095	0.000659	0.000659	0.000661	0.000659	0.00066	0.00066	Novel proteoforms (BRAKER)	0.000659381
MSTRG.1656.1	0.000216935	0.000216097	0.000217	0.000217	0.000216	0.000216	0.000216	0.000216	Novel proteoforms (BRAKER)	0.000216379
MSTRG.4312.1	0.000252537	0.000245266	0.000249	0.000249	0.000248	0.000248	0.000248	0.000248	Novel proteoforms (BRAKER)	0.000248475
MSTRG.7739.1	0.00479623	0.00611578	0.005456	0.005456	0.005676	0.005529	0.005554	0.005586	Novel proteoforms (BRAKER)	0.00552113
MSTRG.5972.1	0.000649101	0.000576848	0.000613	0.000613	0.000601	0.000609	0.000608	0.000606	Proteins from merged genes (BRAKER)	0.000609494
MSTRG.8905.1	0.00027354	0.000336953	0.000305	0.000305	0.000316	0.000309	0.00031	0.000312	Novel proteoforms (BRAKER)	0.000308437
MSTRG.3726.1	0.000297328	0.000265749	0.000282	0.000282	0.000276	0.00028	0.000279	0.000278	Novel proteoforms (BRAKER)	0.00028001
MSTRG.7198.1	NA	1.76e-05	NA	NA	NA	NA	NA	NA	Proteins from merged genes (BRAKER)	1.76e-05
MSTRG.12475.1	0.000178275	0.000468765	0.000324	0.000324	0.000372	0.00034	0.000345	0.000352	Novel proteoforms (BRAKER)	0.000338005
MSTRG.898.1	0.000386075	0.000380826	0.000383	0.000383	0.000383	0.000383	0.000383	0.000383	Proteins from merged genes (BRAKER)	0.000383113
ACOC_0000962901-mRNA-1	0.00102998	0.000953345	0.000992	0.000992	0.000979	0.000987	0.000986	0.000984	Reference proteoforms (WormBase)	0.000987915
ACOC_0001029401-mRNA-1	0.000118373	0.000112844	0.000116	0.000116	0.000115	0.000115	0.000115	0.000115	Reference proteins (WormBase)	0.000115402
ACOC_0001001201-mRNA-1	0.000256133	0.000237176	0.000247	0.000247	0.000243	0.000246	0.000245	0.000245	Reference proteins (WormBase)	0.000245789
MSTRG.4774.1	0.0012501	0.00125744	0.001254	0.001254	0.001255	0.001254	0.001254	0.001254	Novel proteoforms (BRAKER)	0.00125407
MSTRG.1738.1	0.000898408	0.000895767	0.000897	0.000897	0.000897	0.000897	0.000897	0.000897	Novel proteoforms (BRAKER)	0.000897022
ACOC_0000084101-mRNA-1	0.000527079	0.0005643	0.000546	0.000546	0.000552	0.000548	0.000548	0.000549	Reference proteins (WormBase)	0.000547547
MSTRG.1887.1	NA	NA	NA	NA	NA	NA	NA	NA	Novel proteoforms (BRAKER)	#DIV/0!
ACOC_0000198601-mRNA-1	0.000776832	0.000823504	0.0008	0.0008	0.000808	0.000803	0.000804	0.000805	Reference proteoforms (WormBase)	0.000802542
MSTRG.8749.1	0.000462738	0.000600914	0.000532	0.000532	0.000555	0.00054	0.000542	0.000545	Proteins from merged genes (BRAKER)	0.000538706
MSTRG.5219.1	0.000311817	0.00029801	0.000305	0.000305	0.000303	0.000304	0.000304	0.000304	Novel proteoforms (BRAKER)	0.000304353
ACOC_0000524001-mRNA-1	0.000198672	NA	NA	NA	NA	NA	NA	NA	Reference proteoforms (WormBase)	0.000198672
MSTRG.6137.1	0.000832946	0.000887688	0.00086	0.00086	0.000869	0.000863	0.000864	0.000866	Novel proteoforms (BRAKER)	0.000862829
MSTRG.7792.1	0.00644237	0.00602063	0.006232	0.006232	0.006161	0.006208	0.0062	0.00619	Novel proteoforms (BRAKER)	0.00621075
ACOC_0001107101-mRNA-1	0.000879066	0.000966786	0.000923	0.000923	0.000938	0.000928	0.000929	0.000932	Reference proteins (WormBase)	0.000927357
MSTRG.5361.1	0.00362673	0.00352868	0.003578	0.003578	0.003561	0.003572	0.00357	0.003568	Novel proteoforms (BRAKER)	0.0035728
MSTRG.4973.2	0.000119678	9.4984e-05	0.000107	0.000107	0.000103	0.000106	0.000106	0.000105	Novel proteoforms (BRAKER)	0.000106083
MSTRG.4973.1	0.000107564	NA	NA	NA	NA	NA	NA	NA	Novel proteoforms (BRAKER)	0.000107564
MSTRG.495.1	0.000252274	8.19047e-05	0.000167	0.000167	0.000139	0.000158	0.000154	0.00015	Novel proteoforms (BRAKER)	0.000158647
MSTRG.1257.1	0.000171134	0.000163284	0.000167	0.000167	0.000166	0.000167	0.000167	0.000166	Novel proteoforms (BRAKER)	0.000166802
MSTRG.6362.3	0.00015834	0.000166157	0.000162	0.000162	0.000164	0.000163	0.000163	0.000163	Proteins from merged genes (BRAKER)	0.000162687
MSTRG.3881.1	0.000108215	0.000117417	0.000113	0.000113	0.000114	0.000113	0.000113	0.000114	Novel proteoforms (BRAKER)	0.000113204
MSTRG.7959.1	0.000421455	0.000420685	0.000421	0.000421	0.000421	0.000421	0.000421	0.000421	Novel proteoforms (BRAKER)	0.000421017
ACOC_0001068301-mRNA-1	0.000708885	0.00105619	0.000883	0.000883	0.00094	0.000902	0.000908	0.000917	Reference proteoforms (WormBase)	0.000899759
MSTRG.7352.1	9.07e-05	8.6e-05	8.8e-05	8.8e-05	8.8e-05	8.8e-05	8.8e-05	8.8e-05	Novel proteoforms (BRAKER)	8.80875e-05
MSTRG.8854.1	9.05935e-05	6.35e-05	7.7e-05	7.7e-05	7.3e-05	7.6e-05	7.5e-05	7.4e-05	Novel proteoforms (BRAKER)	7.57617e-05
MSTRG.5706.1	0.000528666	0.000437947	0.000483	0.000483	0.000468	0.000478	0.000477	0.000474	Novel proteoforms (BRAKER)	0.000478702
MSTRG.460.1	0.000273929	0.000246928	0.00026	0.00026	0.000256	0.000259	0.000258	0.000258	Novel proteoforms (BRAKER)	0.000258982
MSTRG.416.1	0.000372101	0.000260522	0.000316	0.000316	0.000298	0.00031	0.000308	0.000305	Novel proteoforms (BRAKER)	0.000310703
MSTRG.9770.3	NA	0.0013985	NA	NA	NA	NA	NA	NA	Novel proteoforms (BRAKER)	0.0013985
ACOC_0000200201-mRNA-1	0.000150524	0.000200127	0.000175	0.000175	0.000184	0.000178	0.000179	0.00018	Reference proteins (WormBase)	0.000177706
MSTRG.11694.1	0.00056061	0.000317276	0.000439	0.000439	0.000398	0.000425	0.000421	0.000415	Novel proteoforms (BRAKER)	0.000426861
MSTRG.352.1	NA	3.075e-05	NA	NA	NA	NA	NA	NA	Novel proteoforms (BRAKER)	3.075e-05
MSTRG.5562.1	3.43e-05	3.17e-05	3.3e-05	3.3e-05	3.3e-05	3.3e-05	3.3e-05	3.3e-05	Novel proteoforms (BRAKER)	3.3e-05
ACOC_0000365901-mRNA-1	0.00188703	0.00207224	0.00198	0.00198	0.002011	0.00199	0.001993	0.001998	Reference proteins (WormBase)	0.00198891
MSTRG.6752.1	2.35e-05	NA	NA	NA	NA	NA	NA	NA	Novel proteoforms (BRAKER)	2.35e-05
MSTRG.2197.1	NA	5.13667e-05	NA	NA	NA	NA	NA	NA	Novel proteoforms (BRAKER)	5.13667e-05
ACOC_0000305601-mRNA-1	0.00010775	8.96313e-05	9.9e-05	9.9e-05	9.6e-05	9.8e-05	9.7e-05	9.7e-05	Reference proteoforms (WormBase)	9.79227e-05
MSTRG.1190.1	8.2611e-05	6.23e-05	7.2e-05	7.2e-05	6.9e-05	7.1e-05	7.1e-05	7e-05	Novel proteoforms (BRAKER)	7.12389e-05
MSTRG.7446.1	0.000213425	0.00022834	0.000221	0.000221	0.000223	0.000222	0.000222	0.000222	Novel proteoforms (BRAKER)	0.000221596
MSTRG.1189.1	0.000112677	0.000131246	0.000122	0.000122	0.000125	0.000123	0.000123	0.000124	Novel proteoforms (BRAKER)	0.000122865
MSTRG.11395.2	8.9714e-05	9.43127e-05	9.2e-05	9.2e-05	9.3e-05	9.2e-05	9.2e-05	9.2e-05	Novel proteoforms (BRAKER)	9.21283e-05
ACOC_0000018901-mRNA-1	8.30333e-05	9.4202e-05	8.9e-05	8.9e-05	9e-05	8.9e-05	8.9e-05	9e-05	Reference proteoforms (WormBase)	8.91544e-05
MSTRG.5057.1	0.000915452	0.00107053	0.000993	0.000993	0.001019	0.001002	0.001004	0.001008	Novel proteoforms (BRAKER)	0.00100062
MSTRG.6751.1	NA	0.000349894	NA	NA	NA	NA	NA	NA	Novel proteoforms (BRAKER)	0.000349894
MSTRG.5447.1	0.000574488	0.000480547	0.000528	0.000528	0.000512	0.000522	0.000521	0.000518	Proteins from merged genes (BRAKER)	0.000523004
MSTRG.2027.2	NA	NA	NA	NA	NA	NA	NA	NA	Novel proteoforms (BRAKER)	#DIV/0!
MSTRG.3773.1	NA	0.0007338	NA	NA	NA	NA	NA	NA	Novel proteoforms (BRAKER)	0.0007338
ACOC_0000438501-mRNA-1	0.000452607	0.000424669	0.000439	0.000439	0.000434	0.000437	0.000437	0.000436	Reference proteins (WormBase)	0.000437409
MSTRG.5299.1	0.00235633	0.00214562	0.002251	0.002251	0.002216	0.002239	0.002235	0.00223	Novel proteoforms (BRAKER)	0.00224049
ACOC_0000777401-mRNA-1	0.00152335	0.00166305	0.001593	0.001593	0.001616	0.001601	0.001604	0.001607	Reference proteins (WormBase)	0.00160005
MSTRG.6542.4	0.000592728	0.000467923	0.00053	0.00053	0.00051	0.000523	0.000521	0.000518	Novel proteoforms (BRAKER)	0.000524081
MSTRG.9554.1	NA	NA	NA	NA	NA	NA	NA	NA	Proteins from merged genes (BRAKER)	#DIV/0!
MSTRG.8530.1	0.000303895	0.000344973	0.000324	0.000324	0.000331	0.000327	0.000327	0.000328	Novel proteoforms (BRAKER)	0.000326234
MSTRG.3263.1	0.000275259	0.000301904	0.000289	0.000289	0.000293	0.00029	0.000291	0.000291	Novel proteoforms (BRAKER)	0.00029002
MSTRG.3366.1	0.0011081	0.0011538	0.001131	0.001131	0.001139	0.001133	0.001134	0.001135	Novel proteoforms (BRAKER)	0.00113311
ACOC_0000172801-mRNA-1	0.000151272	0.000153607	0.000152	0.000152	0.000153	0.000153	0.000153	0.000153	Reference proteins (WormBase)	0.00015261
ACOC_0000652001-mRNA-1	0.0001674	0.000269638	0.000219	0.000219	0.000236	0.000224	0.000226	0.000229	Reference proteins (WormBase)	0.000223755
MSTRG.8442.1	NA	NA	NA	NA	NA	NA	NA	NA	Novel proteoforms (BRAKER)	#DIV/0!
MSTRG.11155.1	NA	NA	NA	NA	NA	NA	NA	NA	Novel proteoforms (BRAKER)	#DIV/0!
MSTRG.10688.1	3.725e-05	2.13e-05	2.9e-05	2.9e-05	2.7e-05	2.8e-05	2.8e-05	2.8e-05	Proteins from merged genes (BRAKER)	2.84438e-05
ACOC_0000088301-mRNA-1	NA	NA	NA	NA	NA	NA	NA	NA	Reference proteoforms (WormBase)	#DIV/0!
MSTRG.7404.1	NA	NA	NA	NA	NA	NA	NA	NA	Novel proteoforms (BRAKER)	#DIV/0!
MSTRG.4982.3	NA	NA	NA	NA	NA	NA	NA	NA	Novel proteoforms (BRAKER)	#DIV/0!
MSTRG.6068.1	NA	NA	NA	NA	NA	NA	NA	NA	Novel proteoforms (BRAKER)	#DIV/0!
MSTRG.2808.1	NA	NA	NA	NA	NA	NA	NA	NA	Novel proteoforms (BRAKER)	#DIV/0!
MSTRG.6082.1	5.43e-05	7.87107e-05	6.7e-05	6.7e-05	7.1e-05	6.8e-05	6.8e-05	6.9e-05	Novel proteoforms (BRAKER)	6.78763e-05
ACOC_0000663001-mRNA-1	NA	NA	NA	NA	NA	NA	NA	NA	Reference proteoforms (WormBase)	#DIV/0!
ACOC_0001202101-mRNA-1	0.000318328	0.000251605	0.000285	0.000285	0.000274	0.000281	0.00028	0.000278	Reference proteins (WormBase)	0.000281617
ACOC_0001300301-mRNA-1	0.00338415	0.00305345	0.003219	0.003219	0.003164	0.0032	0.003194	0.003186	Reference proteins (WormBase)	0.00320245
ACOC_0000090101-mRNA-1	0.00234039	0.00227021	0.002305	0.002305	0.002294	0.002301	0.0023	0.002298	Reference proteins (WormBase)	0.0023017
ACOC_0001066601-mRNA-1	0.000311124	0.000222297	0.000267	0.000267	0.000252	0.000262	0.00026	0.000258	Reference proteoforms (WormBase)	0.000262428
MSTRG.10746.1	0.000663398	0.000440183	0.000552	0.000552	0.000515	0.000539	0.000535	0.00053	Novel proteoforms (BRAKER)	0.000540823
MSTRG.5709.1	0.000988205	5.94e-05	0.000524	0.000524	0.000369	0.000472	0.000455	0.000432	Novel proteoforms (BRAKER)	0.000477951
MSTRG.8851.1	0.000169269	7.2349e-05	0.000121	0.000121	0.000105	0.000115	0.000114	0.000111	Proteins from merged genes (BRAKER)	0.000116077
MSTRG.1546.1	0.000255111	0.000297331	0.000276	0.000276	0.000283	0.000279	0.000279	0.00028	Novel proteoforms (BRAKER)	0.00027818
MSTRG.7375.2	0.000199533	0.000237723	0.000219	0.000219	0.000225	0.000221	0.000221	0.000222	Novel proteoforms (BRAKER)	0.000220532
MSTRG.6232.1	1.72e-05	1.61e-05	1.7e-05	1.7e-05	1.6e-05	1.7e-05	1.7e-05	1.7e-05	Novel proteoforms (BRAKER)	1.67875e-05
MSTRG.8647.1	1.94e-05	2.3e-05	2.1e-05	2.1e-05	2.2e-05	2.1e-05	2.1e-05	2.2e-05	Proteins from merged genes (BRAKER)	2.13e-05
MSTRG.4933.1	0.000399582	NA	NA	NA	NA	NA	NA	NA	Novel proteoforms (BRAKER)	0.000399582
MSTRG.10270.1	4.23333e-05	3e-05	3.6e-05	3.6e-05	3.4e-05	3.5e-05	3.5e-05	3.5e-05	Novel proteoforms (BRAKER)	3.54167e-05
ACOC_0000443601-mRNA-1	9.09067e-05	9.24547e-05	9.2e-05	9.2e-05	9.2e-05	9.2e-05	9.2e-05	9.2e-05	Reference proteins (WormBase)	9.19202e-05
MSTRG.12371.1	0.000508832	0.000432286	0.000471	0.000471	0.000458	0.000466	0.000465	0.000463	Novel proteoforms (BRAKER)	0.00046689
MSTRG.6279.1	3.9e-05	NA	NA	NA	NA	NA	NA	NA	Novel proteoforms (BRAKER)	3.9e-05
MSTRG.6583.2	5.86333e-05	5.67e-05	5.8e-05	5.8e-05	5.7e-05	5.8e-05	5.8e-05	5.7e-05	Novel proteoforms (BRAKER)	5.76667e-05
MSTRG.110.1	0.000118695	7.66667e-05	9.8e-05	9.8e-05	9.1e-05	9.5e-05	9.5e-05	9.4e-05	Novel proteoforms (BRAKER)	9.57952e-05
ACOC_0000455501-mRNA-1	0.000116248	3.86333e-05	7.7e-05	7.7e-05	6.5e-05	7.3e-05	7.2e-05	7e-05	Reference proteoforms (WormBase)	7.36102e-05
ACOC_0000459701-mRNA-1	0.00319766	0.00249579	0.002847	0.002847	0.00273	0.002808	0.002795	0.002777	Reference proteins (WormBase)	0.00281218
MSTRG.6802.1	0.00105178	0.0010472	0.001049	0.001049	0.001049	0.001049	0.001049	0.001049	Novel proteoforms (BRAKER)	0.00104912
MSTRG.2345.1	0.000438938	0.000336696	0.000388	0.000388	0.000371	0.000382	0.00038	0.000378	Novel proteoforms (BRAKER)	0.000382829
ACOC_0001116701-mRNA-1	0.000218962	0.000185409	0.000202	0.000202	0.000197	0.0002	0.0002	0.000199	Reference proteins (WormBase)	0.000200546
MSTRG.2597.2	4.79e-05	0.000134383	9.1e-05	9.1e-05	0.000106	9.6e-05	9.8e-05	0.0001	Proteins from merged genes (BRAKER)	9.55354e-05
MSTRG.6200.1	7.68667e-05	6.65e-05	7.2e-05	7.2e-05	7e-05	7.1e-05	7.1e-05	7.1e-05	Novel proteoforms (BRAKER)	7.12958e-05
ACOC_0000631501-mRNA-1	5.56667e-05	5.85333e-05	5.7e-05	5.7e-05	5.8e-05	5.7e-05	5.7e-05	5.7e-05	Reference proteins (WormBase)	5.715e-05
MSTRG.7542.1	0.000183823	0.000157826	0.000171	0.000171	0.000166	0.000169	0.000169	0.000168	Novel proteoforms (BRAKER)	0.000169456
ACOC_0000880701-mRNA-1	0.00178528	0.00202063	0.001903	0.001903	0.001942	0.001916	0.00192	0.001926	Reference proteins (WormBase)	0.00191449
ACOC_0000681601-mRNA-1	0.000330374	0.00048976	0.00041	0.00041	0.000437	0.000419	0.000422	0.000426	Reference proteins (WormBase)	0.000418017
ACOC_0000269601-mRNA-1	8.25297e-05	0.000890915	0.000487	0.000487	0.000621	0.000532	0.000547	0.000567	Reference proteins (WormBase)	0.000526806
MSTRG.2243.1	NA	0.000475232	NA	NA	NA	NA	NA	NA	Novel proteoforms (BRAKER)	0.000475232
MSTRG.9555.1	6.41e-05	7.38667e-05	6.9e-05	6.9e-05	7.1e-05	7e-05	7e-05	7e-05	Novel proteoforms (BRAKER)	6.96208e-05
MSTRG.10540.1	0.00232554	0.00144011	0.001883	0.001883	0.001735	0.001834	0.001817	0.001795	Novel proteins (BRAKER)	0.00183908
MSTRG.4676.1	5.17333e-05	3.17e-05	4.2e-05	4.2e-05	3.8e-05	4.1e-05	4e-05	4e-05	Novel proteoforms (BRAKER)	4.08042e-05
MSTRG.7522.1	NA	NA	NA	NA	NA	NA	NA	NA	Novel proteoforms (BRAKER)	#DIV/0!
MSTRG.5577.1	0.000153003	0.00013641	0.000145	0.000145	0.000142	0.000144	0.000143	0.000143	Novel proteoforms (BRAKER)	0.000143927
MSTRG.786.1	0.000882919	0.000831311	0.000857	0.000857	0.000849	0.000854	0.000853	0.000852	Novel proteoforms (BRAKER)	0.000854529
MSTRG.12566.1	NA	NA	NA	NA	NA	NA	NA	NA	Novel proteoforms (BRAKER)	#DIV/0!
MSTRG.1914.1	0.00109669	0.00102093	0.001059	0.001059	0.001046	0.001055	0.001053	0.001051	Proteins from merged genes (BRAKER)	0.00105508
MSTRG.6741.1	8.19667e-05	8.02e-05	8.1e-05	8.1e-05	8.1e-05	8.1e-05	8.1e-05	8.1e-05	Proteins from merged genes (BRAKER)	8.10208e-05
MSTRG.3718.1	NA	NA	NA	NA	NA	NA	NA	NA	Novel proteoforms (BRAKER)	#DIV/0!
MSTRG.8863.4	4.59e-06	1.43e-06	3e-06	3e-06	2e-06	3e-06	3e-06	3e-06	Proteins from merged genes (BRAKER)	2.8775e-06
MSTRG.10748.2	NA	NA	NA	NA	NA	NA	NA	NA	Novel proteoforms (BRAKER)	#DIV/0!
MSTRG.2257.1	0.00054024	0.000457935	0.000499	0.000499	0.000485	0.000495	0.000493	0.000491	Novel proteoforms (BRAKER)	0.000495022
ACOC_0000208801-mRNA-1	0.000163116	0.000147723	0.000155	0.000155	0.000153	0.000155	0.000154	0.000154	Reference proteins (WormBase)	0.000154605
MSTRG.3591.1	0.000235223	0.000219903	0.000228	0.000228	0.000225	0.000227	0.000226	0.000226	Novel proteoforms (BRAKER)	0.000226891
MSTRG.10795.1	0.000153234	0.000247728	0.0002	0.0002	0.000216	0.000206	0.000207	0.00021	Novel proteoforms (BRAKER)	0.000204995
ACOC_0000645401-mRNA-1	1.4105e-05	NA	NA	NA	NA	NA	NA	NA	Reference proteoforms (WormBase)	1.4105e-05
ACOC_0000595801-mRNA-1	0.00104185	0.00111909	0.00108	0.00108	0.001093	0.001085	0.001086	0.001088	Reference proteins (WormBase)	0.00108412
MSTRG.8363.1	5.91667e-06	5.67333e-06	6e-06	6e-06	6e-06	6e-06	6e-06	6e-06	Novel proteoforms (BRAKER)	5.94875e-06
ACOC_0001020401-mRNA-1	3.45667e-05	2.45667e-05	3e-05	3e-05	2.8e-05	2.9e-05	2.9e-05	2.9e-05	Reference proteoforms (WormBase)	2.92667e-05
ACOC_0001301401-mRNA-1	3.68333e-05	2e-05	2.8e-05	2.8e-05	2.6e-05	2.7e-05	2.7e-05	2.7e-05	Reference proteins (WormBase)	2.74792e-05
MSTRG.2632.1	4.67e-05	3.53e-05	4.1e-05	4.1e-05	3.9e-05	4e-05	4e-05	4e-05	Novel proteoforms (BRAKER)	4.0375e-05
MSTRG.5031.1	0.000940127	0.00110372	0.001022	0.001022	0.001049	0.001031	0.001034	0.001038	Novel proteoforms (BRAKER)	0.00102998
MSTRG.7433.1	3.64333e-06	8.10667e-06	6e-06	6e-06	7e-06	6e-06	6e-06	6e-06	Novel proteoforms (BRAKER)	6.09375e-06
ACOC_0000593801-mRNA-1	5.17667e-05	5.86e-05	5.5e-05	5.5e-05	5.6e-05	5.6e-05	5.6e-05	5.6e-05	Reference proteoforms (WormBase)	5.55458e-05
ACOC_0000963001-mRNA-1	0.000108362	0.000102168	0.000105	0.000105	0.000104	0.000105	0.000105	0.000105	Reference proteins (WormBase)	0.000104941
MSTRG.8289.1	0.000338216	0.000331216	0.000335	0.000335	0.000334	0.000334	0.000334	0.000334	Novel proteoforms (BRAKER)	0.000334429
ACOC_0000141601-mRNA-1	0.00222823	0.00174365	0.001986	0.001986	0.001905	0.001959	0.00195	0.001938	Reference proteins (WormBase)	0.00196198
ACOC_0000455001-mRNA-1	5.47e-05	7.11e-05	6.3e-05	6.3e-05	6.6e-05	6.4e-05	6.4e-05	6.5e-05	Reference proteins (WormBase)	6.385e-05
MSTRG.7313.1	9.11e-05	0.000127933	0.00011	0.00011	0.000116	0.000112	0.000112	0.000113	Novel proteoforms (BRAKER)	0.000111504
MSTRG.6645.1	0.00010684	0.000140098	0.000123	0.000123	0.000129	0.000125	0.000126	0.000127	Proteins from merged genes (BRAKER)	0.000124992
MSTRG.179.1	7.05e-05	6.01e-05	6.5e-05	6.5e-05	6.4e-05	6.5e-05	6.5e-05	6.4e-05	Novel proteoforms (BRAKER)	6.4825e-05
MSTRG.8859.1	0.000131879	9.15667e-05	0.000112	0.000112	0.000105	0.000109	0.000109	0.000108	Novel proteoforms (BRAKER)	0.000109806
ACOC_0000118001-mRNA-1	NA	NA	NA	NA	NA	NA	NA	NA	Reference proteoforms (WormBase)	#DIV/0!
MSTRG.6384.1	5.52667e-06	5.29667e-06	5e-06	5e-06	5e-06	5e-06	5e-06	5e-06	Novel proteoforms (BRAKER)	5.10292e-06
MSTRG.4931.1	1.81333e-05	7.9e-06	1.3e-05	1.3e-05	1.1e-05	1.2e-05	1.2e-05	1.2e-05	Proteins from merged genes (BRAKER)	1.23792e-05
MSTRG.12378.1	7.29333e-05	6.01333e-05	6.7e-05	6.7e-05	6.4e-05	6.6e-05	6.6e-05	6.5e-05	Proteins from merged genes (BRAKER)	6.60083e-05
MSTRG.6280.1	7.01667e-05	7.7538e-05	7.4e-05	7.4e-05	7.5e-05	7.4e-05	7.4e-05	7.5e-05	Novel proteoforms (BRAKER)	7.42131e-05
ACOC_0001318301-mRNA-1	5.79e-05	0.000122284	9e-05	9e-05	0.000101	9.4e-05	9.5e-05	9.6e-05	Reference proteins (WormBase)	9.3273e-05
ACOC_0000463601-mRNA-1	NA	7.79e-06	NA	NA	NA	NA	NA	NA	Reference proteoforms (WormBase)	7.79e-06
ACOC_0001118101-mRNA-1	6.15777e-05	3.35667e-05	4.8e-05	4.8e-05	4.3e-05	4.6e-05	4.5e-05	4.5e-05	Reference proteins (WormBase)	4.62681e-05
MSTRG.1514.2	0.000250208	0.000221548	0.000236	0.000236	0.000231	0.000234	0.000234	0.000233	Novel proteoforms (BRAKER)	0.000234469
MSTRG.7516.1	NA	3.98e-05	NA	NA	NA	NA	NA	NA	Novel proteoforms (BRAKER)	3.98e-05
MSTRG.4630.1	3.48233e-05	5.86667e-05	4.7e-05	4.7e-05	5.1e-05	4.8e-05	4.9e-05	4.9e-05	Novel proteoforms (BRAKER)	4.80613e-05
ACOC_0000406601-mRNA-1	0.000363324	0.000563297	0.000463	0.000463	0.000497	0.000474	0.000478	0.000483	Reference proteoforms (WormBase)	0.000473078
MSTRG.5117.1	3.82333e-05	2.81e-05	3.3e-05	3.3e-05	3.1e-05	3.3e-05	3.2e-05	3.2e-05	Novel proteoforms (BRAKER)	3.25417e-05
MSTRG.9080.1	9.87667e-06	5.21667e-06	8e-06	8e-06	7e-06	7e-06	7e-06	7e-06	Novel proteoforms (BRAKER)	7.38667e-06
MSTRG.11233.1	9.9763e-05	0.000104234	0.000102	0.000102	0.000103	0.000102	0.000102	0.000102	Novel proteoforms (BRAKER)	0.000102125
MSTRG.6275.1	5.87e-05	1.19e-05	3.5e-05	3.5e-05	2.8e-05	3.3e-05	3.2e-05	3.1e-05	Proteins from merged genes (BRAKER)	3.3075e-05
MSTRG.11151.1	7.01333e-05	7.18333e-05	7.1e-05	7.1e-05	7.1e-05	7.1e-05	7.1e-05	7.1e-05	Novel proteoforms (BRAKER)	7.09958e-05
MSTRG.10682.1	7.065e-06	7.49e-06	7e-06	7e-06	7e-06	7e-06	7e-06	7e-06	Novel proteoforms (BRAKER)	7.06938e-06
MSTRG.7011.1	2.19333e-05	2.53667e-05	2.4e-05	2.4e-05	2.4e-05	2.4e-05	2.4e-05	2.4e-05	Novel proteoforms (BRAKER)	2.39125e-05
ACOC_0000185401-mRNA-1	NA	NA	NA	NA	NA	NA	NA	NA	Reference proteins (WormBase)	#DIV/0!
MSTRG.623.1	0.000340744	0.000251474	0.000296	0.000296	0.000281	0.000291	0.000289	0.000287	Novel proteins (BRAKER)	0.000291527
ACOC_0000027801-mRNA-1	0.000347152	0.000416878	0.000382	0.000382	0.000394	0.000386	0.000387	0.000389	Reference proteins (WormBase)	0.000385504
MSTRG.2603.1	NA	2.23e-05	NA	NA	NA	NA	NA	NA	Novel proteoforms (BRAKER)	2.23e-05
MSTRG.11078.1	1.06333e-05	9.74333e-06	1e-05	1e-05	1e-05	1e-05	1e-05	1e-05	Proteins from merged genes (BRAKER)	1.00471e-05
MSTRG.98.1	9.51333e-06	6.47667e-06	8e-06	8e-06	7e-06	8e-06	8e-06	8e-06	Novel proteoforms (BRAKER)	7.87375e-06
MSTRG.3295.1	4.37e-05	6.5e-05	5.4e-05	5.4e-05	5.8e-05	5.6e-05	5.6e-05	5.6e-05	Proteins from merged genes (BRAKER)	5.53375e-05
ACOC_0000546501-mRNA-1	NA	NA	NA	NA	NA	NA	NA	NA	Reference proteoforms (WormBase)	#DIV/0!
ACOC_0000249901-mRNA-1	0.000544256	0.000291212	0.000418	0.000418	0.000376	0.000404	0.000399	0.000393	Reference proteoforms (WormBase)	0.000405433
MSTRG.4525.1	NA	0.000450949	NA	NA	NA	NA	NA	NA	Novel proteoforms (BRAKER)	0.000450949
MSTRG.11358.1	0.000138565	0.000125973	0.000132	0.000132	0.00013	0.000132	0.000131	0.000131	Novel proteins (BRAKER)	0.000131567
MSTRG.6447.1	NA	NA	NA	NA	NA	NA	NA	NA	Novel proteoforms (BRAKER)	#DIV/0!
MSTRG.2479.1	NA	NA	NA	NA	NA	NA	NA	NA	Novel proteoforms (BRAKER)	#DIV/0!
MSTRG.4827.1	6.89e-05	0.00143183	0.00075	0.00075	0.000978	0.000826	0.000851	0.000885	Novel proteins (BRAKER)	0.000817591
ACOC_0000060801-mRNA-1	8.87645e-05	8.47333e-05	8.7e-05	8.7e-05	8.6e-05	8.7e-05	8.6e-05	8.6e-05	Reference proteins (WormBase)	8.65622e-05
MSTRG.1146.1	1.40333e-05	2.515e-05	2e-05	2e-05	2.1e-05	2e-05	2e-05	2.1e-05	Novel proteoforms (BRAKER)	2.01479e-05
MSTRG.9679.1	NA	NA	NA	NA	NA	NA	NA	NA	Novel proteoforms (BRAKER)	#DIV/0!
MSTRG.7568.1	1.44333e-05	2.22133e-05	1.8e-05	1.8e-05	2e-05	1.9e-05	1.9e-05	1.9e-05	Novel proteoforms (BRAKER)	1.87058e-05
ACOC_0000719001-mRNA-1	0.000274325	0.000228144	0.000251	0.000251	0.000244	0.000249	0.000248	0.000247	Reference proteins (WormBase)	0.000249059
MSTRG.1941.1	1.768e-06	3.551e-07	1e-06	1e-06	1e-06	1e-06	1e-06	1e-06	Proteins from merged genes (BRAKER)	1.01539e-06
MSTRG.1380.1	0.000281109	0.000639162	0.00046	0.00046	0.00052	0.00048	0.000487	0.000495	Novel proteoforms (BRAKER)	0.000477784
ACOC_0001218801-mRNA-1	7.71233e-05	8.92207e-05	8.3e-05	8.3e-05	8.5e-05	8.4e-05	8.4e-05	8.4e-05	Proteins from split genes (WormBase)	8.3668e-05
ACOC_0000194401-mRNA-1	6.35e-05	6.32667e-05	6.3e-05	6.3e-05	6.3e-05	6.3e-05	6.3e-05	6.3e-05	Reference proteins (WormBase)	6.30958e-05
MSTRG.10028.1	NA	NA	NA	NA	NA	NA	NA	NA	Proteins from merged genes (BRAKER)	#DIV/0!
ACOC_0000623601-mRNA-1	0.000141778	8.5687e-05	0.000114	0.000114	0.000104	0.000111	0.00011	0.000108	Reference proteins (WormBase)	0.000111058
MSTRG.10751.1	9.17e-06	1.40333e-05	1.2e-05	1.2e-05	1.2e-05	1.2e-05	1.2e-05	1.2e-05	Proteins from merged genes (BRAKER)	1.19004e-05
ACOC_0001102201-mRNA-1	NA	NA	NA	NA	NA	NA	NA	NA	Proteins from split genes (WormBase)	#DIV/0!
MSTRG.5888.1	9.14e-06	4.21e-05	2.6e-05	2.6e-05	3.1e-05	2.7e-05	2.8e-05	2.9e-05	Novel proteoforms (BRAKER)	2.728e-05
MSTRG.9480.1	1.62e-05	1.365e-05	1.5e-05	1.5e-05	1.5e-05	1.5e-05	1.5e-05	1.5e-05	Novel proteoforms (BRAKER)	1.49812e-05
MSTRG.1291.1	8.825e-05	7.62667e-05	8.2e-05	8.2e-05	8e-05	8.2e-05	8.1e-05	8.1e-05	Novel proteoforms (BRAKER)	8.15646e-05
MSTRG.6419.1	0.000208842	0.000122972	0.000166	0.000166	0.000152	0.000161	0.00016	0.000157	Proteins from merged genes (BRAKER)	0.000161727
MSTRG.11610.1	NA	NA	NA	NA	NA	NA	NA	NA	Novel proteoforms (BRAKER)	#DIV/0!
MSTRG.7658.3	6.115e-05	3.945e-05	5e-05	5e-05	4.7e-05	4.9e-05	4.9e-05	4.8e-05	Novel proteoforms (BRAKER)	4.92e-05
MSTRG.5790.3	0.00010462	6.57393e-05	8.5e-05	8.5e-05	7.9e-05	8.3e-05	8.2e-05	8.1e-05	Novel proteoforms (BRAKER)	8.31699e-05
ACOC_0000209901-mRNA-1	2.35e-05	NA	NA	NA	NA	NA	NA	NA	Reference proteins (WormBase)	2.35e-05
MSTRG.5426.1	0.000674984	0.000560416	0.000618	0.000618	0.000599	0.000611	0.000609	0.000606	Novel proteoforms (BRAKER)	0.00061205
MSTRG.6676.1	NA	NA	NA	NA	NA	NA	NA	NA	Proteins from merged genes (BRAKER)	#DIV/0!
MSTRG.1164.3	NA	NA	NA	NA	NA	NA	NA	NA	Novel proteoforms (BRAKER)	#DIV/0!
MSTRG.7027.2	NA	NA	NA	NA	NA	NA	NA	NA	Novel proteoforms (BRAKER)	#DIV/0!
ACOC_0000575601-mRNA-1	0.000619785	0.000487454	0.000554	0.000554	0.000532	0.000546	0.000544	0.000541	Reference proteoforms (WormBase)	0.00054728
MSTRG.3097.1	1.475e-05	2.16e-05	1.8e-05	1.8e-05	1.9e-05	1.9e-05	1.9e-05	1.9e-05	Proteins from merged genes (BRAKER)	1.85438e-05
MSTRG.1885.1	7.82e-05	NA	NA	NA	NA	NA	NA	NA	Novel proteoforms (BRAKER)	7.82e-05
MSTRG.7255.1	NA	NA	NA	NA	NA	NA	NA	NA	Novel proteoforms (BRAKER)	#DIV/0!
ACOC_0000646501-mRNA-1	2.405e-05	3.385e-05	2.9e-05	2.9e-05	3.1e-05	2.9e-05	3e-05	3e-05	Reference proteoforms (WormBase)	2.94875e-05
MSTRG.12291.1	9.6e-06	NA	NA	NA	NA	NA	NA	NA	Novel proteoforms (BRAKER)	9.6e-06
ACOC_0000160101-mRNA-1	3.8e-05	2.97e-05	3.4e-05	3.4e-05	3.2e-05	3.3e-05	3.3e-05	3.3e-05	Reference proteoforms (WormBase)	3.33375e-05
ACOC_0000057801-mRNA-1	0.000187632	0.000259048	0.000223	0.000223	0.000235	0.000227	0.000229	0.00023	Reference proteins (WormBase)	0.00022671
MSTRG.1167.1	NA	1.2775e-05	NA	NA	NA	NA	NA	NA	Novel proteoforms (BRAKER)	1.2775e-05
MSTRG.11974.1	NA	NA	NA	NA	NA	NA	NA	NA	Novel proteoforms (BRAKER)	#DIV/0!
ACOC_0000382601-mRNA-1	5.15e-06	8.98e-06	7e-06	7e-06	8e-06	7e-06	7e-06	7e-06	Reference proteins (WormBase)	7.14125e-06
MSTRG.6576.1	7.26e-06	NA	NA	NA	NA	NA	NA	NA	Novel proteoforms (BRAKER)	7.26e-06
ACOC_0000368401-mRNA-1	NA	0.00014807	NA	NA	NA	NA	NA	NA	Reference proteins (WormBase)	0.00014807
MSTRG.1491.1	NA	NA	NA	NA	NA	NA	NA	NA	Proteins from merged genes (BRAKER)	#DIV/0!
MSTRG.8691.1	NA	2.41e-05	NA	NA	NA	NA	NA	NA	Novel proteins (BRAKER)	2.41e-05
MSTRG.7413.1	1.53e-05	2.85e-05	2.2e-05	2.2e-05	2.4e-05	2.3e-05	2.3e-05	2.3e-05	Novel proteoforms (BRAKER)	2.26e-05
MSTRG.1196.2	7.80333e-05	6.635e-05	7.2e-05	7.2e-05	7e-05	7.2e-05	7.1e-05	7.1e-05	Novel proteoforms (BRAKER)	7.15479e-05
MSTRG.5749.1	NA	2.32e-05	NA	NA	NA	NA	NA	NA	Novel proteoforms (BRAKER)	2.32e-05
MSTRG.7833.1	9.96667e-06	8.97333e-06	9e-06	9e-06	9e-06	9e-06	9e-06	9e-06	Novel proteoforms (BRAKER)	9.1175e-06
MSTRG.3270.2	3.25333e-05	2.98e-05	3.1e-05	3.1e-05	3.1e-05	3.1e-05	3.1e-05	3.1e-05	Novel proteoforms (BRAKER)	3.10417e-05
MSTRG.4823.1	1.008e-05	1.38433e-05	1.2e-05	1.2e-05	1.3e-05	1.2e-05	1.2e-05	1.2e-05	Proteins from merged genes (BRAKER)	1.21154e-05
MSTRG.12525.1	1.56e-05	1.27333e-05	1.4e-05	1.4e-05	1.4e-05	1.4e-05	1.4e-05	1.4e-05	Novel proteoforms (BRAKER)	1.40417e-05
MSTRG.2170.1	NA	NA	NA	NA	NA	NA	NA	NA	Novel proteoforms (BRAKER)	#DIV/0!
MSTRG.5094.1	1.725e-05	NA	NA	NA	NA	NA	NA	NA	Novel proteoforms (BRAKER)	1.725e-05
MSTRG.6452.1	0.000467003	0.000535609	0.000501	0.000501	0.000513	0.000505	0.000506	0.000508	Novel proteoforms (BRAKER)	0.000504577
MSTRG.2268.1	2.55e-05	2.03e-05	2.3e-05	2.3e-05	2.2e-05	2.3e-05	2.3e-05	2.2e-05	Novel proteoforms (BRAKER)	2.2725e-05
ACOC_0000563901-mRNA-1	1.06e-05	6.36e-06	8e-06	8e-06	8e-06	8e-06	8e-06	8e-06	Reference proteins (WormBase)	8.12e-06
ACOC_0000484901-mRNA-1	0.000627104	0.000515173	0.000571	0.000571	0.000552	0.000565	0.000563	0.00056	Reference proteins (WormBase)	0.000565535
MSTRG.2568.1	1.07633e-05	4.77e-06	8e-06	8e-06	7e-06	7e-06	7e-06	7e-06	Novel proteoforms (BRAKER)	7.44166e-06
MSTRG.12088.1	5.55e-05	2.695e-05	4.1e-05	4.1e-05	3.6e-05	4e-05	3.9e-05	3.8e-05	Novel proteoforms (BRAKER)	3.96812e-05
ACOC_0001163601-mRNA-1	8.94e-06	5.06e-06	7e-06	7e-06	6e-06	7e-06	7e-06	7e-06	Reference proteins (WormBase)	6.875e-06
MSTRG.6916.1	NA	NA	NA	NA	NA	NA	NA	NA	Novel proteoforms (BRAKER)	#DIV/0!
MSTRG.7816.1	1.52333e-05	1.98e-05	1.8e-05	1.8e-05	1.8e-05	1.8e-05	1.8e-05	1.8e-05	Novel proteoforms (BRAKER)	1.78792e-05
MSTRG.7876.1	NA	1.27e-05	NA	NA	NA	NA	NA	NA	Novel proteoforms (BRAKER)	1.27e-05
MSTRG.434.1	6.15e-06	6.05e-06	6e-06	6e-06	6e-06	6e-06	6e-06	6e-06	Novel proteoforms (BRAKER)	6.025e-06
MSTRG.6187.1	8.95e-05	8.31667e-05	8.6e-05	8.6e-05	8.5e-05	8.6e-05	8.6e-05	8.6e-05	Novel proteins (BRAKER)	8.59583e-05
ACOC_0000087201-mRNA-1	3.13e-06	1.56e-05	9e-06	9e-06	1.1e-05	1e-05	1e-05	1.1e-05	Proteins from split genes (WormBase)	9.84125e-06
MSTRG.3036.1	1.645e-05	NA	NA	NA	NA	NA	NA	NA	Novel proteoforms (BRAKER)	1.645e-05
ACOC_0000918701-mRNA-1	1.14033e-05	1.468e-05	1.3e-05	1.3e-05	1.4e-05	1.3e-05	1.3e-05	1.3e-05	Proteins from split genes (WormBase)	1.31354e-05
ACOC_0000666101-mRNA-1	1.57e-05	1.885e-05	1.7e-05	1.7e-05	1.8e-05	1.7e-05	1.8e-05	1.8e-05	Reference proteoforms (WormBase)	1.74438e-05
MSTRG.11787.1	7.135e-06	2.96333e-06	5e-06	5e-06	4e-06	5e-06	5e-06	5e-06	Novel proteoforms (BRAKER)	4.88729e-06
MSTRG.11631.1	NA	NA	NA	NA	NA	NA	NA	NA	Novel proteins (BRAKER)	#DIV/0!
MSTRG.6418.1	NA	NA	NA	NA	NA	NA	NA	NA	Novel proteoforms (BRAKER)	#DIV/0!
MSTRG.11520.1	NA	NA	NA	NA	NA	NA	NA	NA	Proteins from merged genes (BRAKER)	#DIV/0!
MSTRG.4444.1	NA	NA	NA	NA	NA	NA	NA	NA	Novel proteoforms (BRAKER)	#DIV/0!
MSTRG.11462.1	4.71e-06	NA	NA	NA	NA	NA	NA	NA	Proteins from merged genes (BRAKER)	4.71e-06
MSTRG.12172.1	NA	1.22e-06	NA	NA	NA	NA	NA	NA	Novel proteoforms (BRAKER)	1.22e-06
MSTRG.5785.1	9.83e-06	NA	NA	NA	NA	NA	NA	NA	Novel proteins (BRAKER)	9.83e-06
MSTRG.6981.2	NA	NA	NA	NA	NA	NA	NA	NA	Novel proteoforms (BRAKER)	#DIV/0!
MSTRG.10477.1	1.68e-06	9.06e-05	4.6e-05	4.6e-05	6.1e-05	5.1e-05	5.3e-05	5.5e-05	Proteins from merged genes (BRAKER)	5.0535e-05
MSTRG.10333.1	7.35e-06	8.92333e-06	8e-06	8e-06	8e-06	8e-06	8e-06	8e-06	Novel proteoforms (BRAKER)	8.03417e-06
MSTRG.2702.1	0.000103644	8.76887e-05	9.6e-05	9.6e-05	9.3e-05	9.5e-05	9.4e-05	9.4e-05	Novel proteoforms (BRAKER)	9.49166e-05
MSTRG.5223.1	8.48e-06	NA	NA	NA	NA	NA	NA	NA	Novel proteoforms (BRAKER)	8.48e-06
MSTRG.4065.1	3.825e-05	4.41e-05	4.1e-05	4.1e-05	4.2e-05	4.2e-05	4.2e-05	4.2e-05	Novel proteins (BRAKER)	4.15437e-05
MSTRG.9191.1	2.71e-06	NA	NA	NA	NA	NA	NA	NA	Proteins from merged genes (BRAKER)	2.71e-06
MSTRG.7750.1	NA	NA	NA	NA	NA	NA	NA	NA	Proteins from merged genes (BRAKER)	#DIV/0!
MSTRG.1480.1	5.01e-06	NA	NA	NA	NA	NA	NA	NA	Novel proteins (BRAKER)	5.01e-06
MSTRG.4685.1	NA	NA	NA	NA	NA	NA	NA	NA	Proteins from merged genes (BRAKER)	#DIV/0!
MSTRG.7074.1	2.09e-06	NA	NA	NA	NA	NA	NA	NA	Novel proteoforms (BRAKER)	2.09e-06
MSTRG.4708.1	NA	NA	NA	NA	NA	NA	NA	NA	Novel proteoforms (BRAKER)	#DIV/0!
MSTRG.7441.1	NA	NA	NA	NA	NA	NA	NA	NA	Novel proteoforms (BRAKER)	#DIV/0!
MSTRG.11080.1	1.0925e-06	1.7e-06	1e-06	1e-06	1e-06	1e-06	1e-06	1e-06	Novel proteoforms (BRAKER)	1.09906e-06
MSTRG.3994.1	NA	5.24e-05	NA	NA	NA	NA	NA	NA	Novel proteoforms (BRAKER)	5.24e-05
ACOC_0000030501-mRNA-1	NA	NA	NA	NA	NA	NA	NA	NA	Reference proteoforms (WormBase)	#DIV/0!
MSTRG.7591.1	4.52e-05	1.905e-05	3.2e-05	3.2e-05	2.8e-05	3.1e-05	3e-05	3e-05	Novel proteoforms (BRAKER)	3.09063e-05
MSTRG.2442.1	6.49e-06	NA	NA	NA	NA	NA	NA	NA	Novel proteoforms (BRAKER)	6.49e-06
MSTRG.254.1	NA	NA	NA	NA	NA	NA	NA	NA	Novel proteoforms (BRAKER)	#DIV/0!
MSTRG.7907.1	NA	NA	NA	NA	NA	NA	NA	NA	Novel proteoforms (BRAKER)	#DIV/0!
MSTRG.10199.3	0.00025602	NA	NA	NA	NA	NA	NA	NA	Novel proteoforms (BRAKER)	0.00025602
MSTRG.11766.1	NA	NA	NA	NA	NA	NA	NA	NA	Novel proteoforms (BRAKER)	#DIV/0!
MSTRG.4396.1	NA	6.99e-06	NA	NA	NA	NA	NA	NA	Novel proteoforms (BRAKER)	6.99e-06
MSTRG.23.1	NA	NA	NA	NA	NA	NA	NA	NA	Proteins from merged genes (BRAKER)	#DIV/0!
MSTRG.6675.1	NA	3.2e-05	NA	NA	NA	NA	NA	NA	Novel proteoforms (BRAKER)	3.2e-05
ACOC_0000234501-mRNA-1	NA	1.07633e-05	NA	NA	NA	NA	NA	NA	Reference proteins (WormBase)	1.07633e-05
MSTRG.2542.1	NA	4.245e-05	NA	NA	NA	NA	NA	NA	Novel proteoforms (BRAKER)	4.245e-05
MSTRG.10824.1	0.000940324	0.00121545	0.001078	0.001078	0.001124	0.001093	0.001098	0.001105	Novel proteoforms (BRAKER)	0.00109147
MSTRG.9788.1	0.00139333	0.00141694	0.001405	0.001405	0.001409	0.001406	0.001407	0.001407	Novel proteoforms (BRAKER)	0.00140616
ACOC_0001282401-mRNA-1	0.0157987	0.0119092	0.013854	0.013854	0.013206	0.013638	0.013566	0.01347	Reference proteoforms (WormBase)	0.013662
MSTRG.8132.1	NA	NA	NA	NA	NA	NA	NA	NA	Proteins from merged genes (BRAKER)	#DIV/0!
MSTRG.8681.1	0.00493258	0.00513905	0.005036	0.005036	0.00507	0.005047	0.005051	0.005056	Novel proteoforms (BRAKER)	0.00504595
MSTRG.5905.1	0.000265827	0.000273485	0.00027	0.00027	0.000271	0.00027	0.00027	0.00027	Novel proteoforms (BRAKER)	0.000270039
ACOC_0000959301-mRNA-1	0.00371748	0.0041926	0.003955	0.003955	0.004034	0.003981	0.00399	0.004002	Reference proteins (WormBase)	0.00397838
MSTRG.3141.1	NA	NA	NA	NA	NA	NA	NA	NA	Novel proteoforms (BRAKER)	#DIV/0!
ACOC_0000482401-mRNA-1	0.00108686	0.00114927	0.001118	0.001118	0.001128	0.001122	0.001123	0.001124	Reference proteins (WormBase)	0.00112114
ACOC_0001097101-mRNA-1	NA	NA	NA	NA	NA	NA	NA	NA	Reference proteins (WormBase)	#DIV/0!
MSTRG.2635.1	5.25667e-05	6.27333e-05	5.8e-05	5.8e-05	5.9e-05	5.8e-05	5.8e-05	5.9e-05	Novel proteoforms (BRAKER)	5.81625e-05
ACOC_0000542701-mRNA-1	0.001316	0.00111765	0.001217	0.001217	0.001184	0.001206	0.001202	0.001197	Reference proteoforms (WormBase)	0.00120708
ACOC_0001047701-mRNA-1	0.000496363	0.000383079	0.00044	0.00044	0.000421	0.000433	0.000431	0.000429	Reference proteoforms (WormBase)	0.00043418
ACOC_0000914301-mRNA-1	NA	NA	NA	NA	NA	NA	NA	NA	Reference proteoforms (WormBase)	#DIV/0!
ACOC_0000800301-mRNA-1	NA	NA	NA	NA	NA	NA	NA	NA	Reference proteins (WormBase)	#DIV/0!
ACOC_0000316401-mRNA-1	0.00675132	0.00778653	0.007269	0.007269	0.007441	0.007326	0.007346	0.007371	Reference proteins (WormBase)	0.00731998
MSTRG.12662.1	NA	NA	NA	NA	NA	NA	NA	NA	Novel proteoforms (BRAKER)	#DIV/0!
ACOC_0000581801-mRNA-1	0.0021436	0.00216491	0.002154	0.002154	0.002158	0.002155	0.002156	0.002156	Reference proteoforms (WormBase)	0.00215519
MSTRG.9931.6	NA	NA	NA	NA	NA	NA	NA	NA	Proteins from merged genes (BRAKER)	#DIV/0!
ACOC_0001006101-mRNA-1	0.0129727	0.0122175	0.012595	0.012595	0.012469	0.012553	0.012539	0.01252	Reference proteins (WormBase)	0.0125576
ACOC_0001249301-mRNA-1	0.00141252	0.00134491	0.001379	0.001379	0.001367	0.001375	0.001374	0.001372	Reference proteoforms (WormBase)	0.00137543
MSTRG.12200.2	0.00146383	0.00131058	0.001387	0.001387	0.001362	0.001379	0.001376	0.001372	Novel proteoforms (BRAKER)	0.00137968
MSTRG.7332.1	0.00506282	0.00452886	0.004796	0.004796	0.004707	0.004766	0.004756	0.004743	Novel proteoforms (BRAKER)	0.00476946
MSTRG.4702.1	0.00037473	0.000316581	0.000346	0.000346	0.000336	0.000342	0.000341	0.00034	Novel proteoforms (BRAKER)	0.000342789
MSTRG.232.1	5.9e-05	4.78333e-05	5.3e-05	5.3e-05	5.2e-05	5.3e-05	5.3e-05	5.2e-05	Novel proteoforms (BRAKER)	5.28542e-05
MSTRG.2089.1	8.43123e-05	0.000116756	0.000101	0.000101	0.000106	0.000102	0.000103	0.000104	Novel proteoforms (BRAKER)	0.000102259
MSTRG.8000.1	0.00228905	0.00238239	0.002336	0.002336	0.002351	0.002341	0.002343	0.002345	Proteins from merged genes (BRAKER)	0.00234043
MSTRG.12540.1	7.04667e-05	7.64333e-05	7.3e-05	7.3e-05	7.4e-05	7.4e-05	7.4e-05	7.4e-05	Novel proteoforms (BRAKER)	7.36125e-05
ACOC_0001283101-mRNA-1	4.33e-05	5.48e-05	4.9e-05	4.9e-05	5.1e-05	5e-05	5e-05	5e-05	Reference proteoforms (WormBase)	4.96375e-05
MSTRG.212.1	5.61333e-05	5.48667e-05	5.6e-05	5.6e-05	5.5e-05	5.5e-05	5.5e-05	5.5e-05	Novel proteoforms (BRAKER)	5.5375e-05
MSTRG.7359.1	9.49433e-05	0.000101713	9.8e-05	9.8e-05	9.9e-05	9.9e-05	9.9e-05	9.9e-05	Novel proteoforms (BRAKER)	9.8582e-05
ACOC_0000900301-mRNA-1	0.00224975	0.00264297	0.002446	0.002446	0.002512	0.002468	0.002475	0.002485	Reference proteoforms (WormBase)	0.00246559
MSTRG.7034.1	0.00129028	0.00131017	0.0013	0.0013	0.001304	0.001301	0.001302	0.001302	Novel proteoforms (BRAKER)	0.00130118
ACOC_0000016501-mRNA-1	0.00174227	0.00171398	0.001728	0.001728	0.001723	0.001727	0.001726	0.001725	Proteins from split genes (WormBase)	0.00172666
MSTRG.145.1	0.0018794	0.00177961	0.00183	0.00183	0.001813	0.001824	0.001822	0.00182	Proteins from merged genes (BRAKER)	0.00182475
MSTRG.5776.1	NA	NA	NA	NA	NA	NA	NA	NA	Novel proteoforms (BRAKER)	#DIV/0!
MSTRG.5636.1	0.000540577	0.000485639	0.000513	0.000513	0.000504	0.00051	0.000509	0.000508	Novel proteoforms (BRAKER)	0.000510402
MSTRG.6029.1	0.000222729	0.000221455	0.000222	0.000222	0.000222	0.000222	0.000222	0.000222	Novel proteoforms (BRAKER)	0.000222023
ACOC_0000352901-mRNA-1	0.000274944	0.000257769	0.000266	0.000266	0.000263	0.000265	0.000265	0.000265	Reference proteoforms (WormBase)	0.000265339
MSTRG.6229.1	0.000405354	0.00051364	0.000459	0.000459	0.000478	0.000466	0.000468	0.00047	Novel proteoforms (BRAKER)	0.000464874
MSTRG.8452.1	0.000231183	0.000221043	0.000226	0.000226	0.000224	0.000226	0.000225	0.000225	Novel proteoforms (BRAKER)	0.000225528
ACOC_0000276601-mRNA-1	0.000555143	0.00054749	0.000551	0.000551	0.00055	0.000551	0.000551	0.000551	Reference proteins (WormBase)	0.000550954
ACOC_0000961501-mRNA-1	1.61333e-05	1.90333e-05	1.8e-05	1.8e-05	1.8e-05	1.8e-05	1.8e-05	1.8e-05	Reference proteoforms (WormBase)	1.78958e-05
MSTRG.2040.1	0.000155746	0.000170575	0.000163	0.000163	0.000166	0.000164	0.000164	0.000165	Proteins from merged genes (BRAKER)	0.000163915
ACOC_0001270101-mRNA-1	0.000191526	0.000205525	0.000199	0.000199	0.000201	0.000199	0.0002	0.0002	Reference proteins (WormBase)	0.000199381
MSTRG.6382.1	0.000343151	0.000394112	0.000369	0.000369	0.000377	0.000371	0.000372	0.000374	Novel proteoforms (BRAKER)	0.000371158
MSTRG.12103.2	5.98e-05	NA	NA	NA	NA	NA	NA	NA	Proteins from merged genes (BRAKER)	5.98e-05
MSTRG.7752.1	0.000178583	0.000358688	0.000269	0.000269	0.000299	0.000279	0.000282	0.000286	Novel proteoforms (BRAKER)	0.000277659
MSTRG.7539.1	NA	NA	NA	NA	NA	NA	NA	NA	Novel proteoforms (BRAKER)	#DIV/0!
ACOC_0000314101-mRNA-1	0.000228438	0.000230872	0.00023	0.00023	0.00023	0.00023	0.00023	0.00023	Reference proteoforms (WormBase)	0.000229914
MSTRG.9114.1	0.000127267	5.655e-05	9.2e-05	9.2e-05	8e-05	8.8e-05	8.7e-05	8.5e-05	Novel proteoforms (BRAKER)	8.84771e-05
MSTRG.4710.1	0.000104589	8.7174e-05	9.6e-05	9.6e-05	9.3e-05	9.5e-05	9.5e-05	9.4e-05	Novel proteoforms (BRAKER)	9.50954e-05
MSTRG.1486.2	9.24303e-05	0.000110633	0.000102	0.000102	0.000105	0.000103	0.000103	0.000103	Novel proteoforms (BRAKER)	0.000102633
MSTRG.2425.1	6.35e-05	NA	NA	NA	NA	NA	NA	NA	Proteins from merged genes (BRAKER)	6.35e-05
MSTRG.4807.1	0.000363245	0.000360126	0.000362	0.000362	0.000361	0.000362	0.000361	0.000361	Novel proteoforms (BRAKER)	0.000361546
MSTRG.8430.1	NA	NA	NA	NA	NA	NA	NA	NA	Novel proteoforms (BRAKER)	#DIV/0!
ACOC_0001316101-mRNA-1	0.00166358	0.00162586	0.001645	0.001645	0.001638	0.001643	0.001642	0.001641	Reference proteins (WormBase)	0.00164293
MSTRG.8373.2	9.58723e-05	0.000100498	9.8e-05	9.8e-05	9.9e-05	9.8e-05	9.9e-05	9.9e-05	Novel proteoforms (BRAKER)	9.84213e-05
MSTRG.4792.1	2.1e-05	1.47667e-05	1.8e-05	1.8e-05	1.7e-05	1.8e-05	1.7e-05	1.7e-05	Proteins from merged genes (BRAKER)	1.75958e-05
ACOC_0000915101-mRNA-1	NA	NA	NA	NA	NA	NA	NA	NA	Reference proteoforms (WormBase)	#DIV/0!
MSTRG.8951.1	0.00033537	0.000284175	0.00031	0.00031	0.000301	0.000307	0.000306	0.000305	Novel proteoforms (BRAKER)	0.000307318
ACOC_0000418701-mRNA-1	0.00237064	0.00237048	0.002371	0.002371	0.002371	0.002371	0.002371	0.002371	Reference proteoforms (WormBase)	0.00237089
MSTRG.865.1	0.00128735	0.00150971	0.001399	0.001399	0.001436	0.001411	0.001415	0.00142	Novel proteoforms (BRAKER)	0.00140963
MSTRG.5633.1	0.000200828	0.000143761	0.000172	0.000172	0.000163	0.000169	0.000168	0.000167	Proteins from merged genes (BRAKER)	0.000169449
MSTRG.1218.1	9.72e-05	0.00010583	0.000102	0.000102	0.000103	0.000102	0.000102	0.000102	Novel proteoforms (BRAKER)	0.000102004
MSTRG.1677.1	7.90667e-05	9.32113e-05	8.6e-05	8.6e-05	8.8e-05	8.7e-05	8.7e-05	8.8e-05	Novel proteoforms (BRAKER)	8.67847e-05
MSTRG.7698.1	3.55333e-05	3.705e-05	3.6e-05	3.6e-05	3.7e-05	3.6e-05	3.6e-05	3.6e-05	Novel proteoforms (BRAKER)	3.61979e-05
ACOC_0001219601-mRNA-1	0.00182945	0.00203344	0.001931	0.001931	0.001965	0.001943	0.001947	0.001952	Reference proteins (WormBase)	0.00194149
MSTRG.11866.1	0.000254936	0.000247156	0.000251	0.000251	0.00025	0.000251	0.00025	0.00025	Proteins from merged genes (BRAKER)	0.000250636
MSTRG.5611.1	NA	NA	NA	NA	NA	NA	NA	NA	Novel proteoforms (BRAKER)	#DIV/0!
ACOC_0000526401-mRNA-1	6.77077e-05	9.51523e-05	8.1e-05	8.1e-05	8.6e-05	8.3e-05	8.3e-05	8.4e-05	Reference proteoforms (WormBase)	8.26075e-05
MSTRG.5240.3	6.98e-05	7.41317e-05	7.2e-05	7.2e-05	7.3e-05	7.2e-05	7.2e-05	7.2e-05	Novel proteoforms (BRAKER)	7.21165e-05
MSTRG.9160.1	7.67e-05	7.05e-05	7.4e-05	7.4e-05	7.3e-05	7.3e-05	7.3e-05	7.3e-05	Proteins from merged genes (BRAKER)	7.34e-05
ACOC_0001154901-mRNA-1	NA	4.92e-05	NA	NA	NA	NA	NA	NA	Reference proteoforms (WormBase)	4.92e-05
MSTRG.3262.1	NA	0.0003021	NA	NA	NA	NA	NA	NA	Novel proteoforms (BRAKER)	0.0003021
MSTRG.2432.3	0.000541867	0.000610111	0.000576	0.000576	0.000587	0.00058	0.000581	0.000583	Novel proteoforms (BRAKER)	0.000579372
MSTRG.11362.1	0.000516326	0.000203007	0.00036	0.00036	0.000307	0.000342	0.000336	0.000329	Novel proteoforms (BRAKER)	0.000344167
ACOC_0000825701-mRNA-1	0.000127898	9.37317e-05	0.000111	0.000111	0.000105	0.000109	0.000108	0.000107	Reference proteins (WormBase)	0.000109079
ACOC_0000311501-mRNA-1	0.000617629	0.000611964	0.000615	0.000615	0.000614	0.000614	0.000614	0.000614	Reference proteoforms (WormBase)	0.000614449
ACOC_0000755501-mRNA-1	NA	0.000174098	NA	NA	NA	NA	NA	NA	Reference proteoforms (WormBase)	0.000174098
ACOC_0001014601-mRNA-1	0.000291015	0.000351939	0.000321	0.000321	0.000332	0.000325	0.000326	0.000327	Reference proteins (WormBase)	0.000324369
MSTRG.6573.1	6.17e-05	0.00014447	0.000103	0.000103	0.000117	0.000108	0.000109	0.000111	Novel proteoforms (BRAKER)	0.000107146
ACOC_0000464601-mRNA-1	0.000133125	0.000140701	0.000137	0.000137	0.000138	0.000137	0.000137	0.000138	Reference proteins (WormBase)	0.000137228
MSTRG.735.1	0.000474392	0.000412188	0.000443	0.000443	0.000433	0.00044	0.000439	0.000437	Novel proteoforms (BRAKER)	0.000440198
ACOC_0000023201-mRNA-1	0.000167763	0.000175094	0.000171	0.000171	0.000173	0.000172	0.000172	0.000172	Reference proteins (WormBase)	0.000171732
ACOC_0000012301-mRNA-1	0.000430067	0.000314198	0.000372	0.000372	0.000353	0.000366	0.000364	0.000361	Reference proteins (WormBase)	0.000366533
ACOC_0000994001-mRNA-1	6.52333e-05	4.55333e-05	5.5e-05	5.5e-05	5.2e-05	5.4e-05	5.4e-05	5.3e-05	Proteins from split genes (WormBase)	5.42208e-05
ACOC_0001133801-mRNA-1	0.00349307	0.00331499	0.003404	0.003404	0.003374	0.003394	0.003391	0.003386	Reference proteins (WormBase)	0.00339513
ACOC_0001142401-mRNA-1	0.00454892	0.00587209	0.005211	0.005211	0.005431	0.005284	0.005309	0.005341	Reference proteins (WormBase)	0.005276
MSTRG.6238.1	2.64e-05	NA	NA	NA	NA	NA	NA	NA	Novel proteoforms (BRAKER)	2.64e-05
MSTRG.4791.1	0.000214782	0.00015989	0.000187	0.000187	0.000178	0.000184	0.000183	0.000182	Novel proteoforms (BRAKER)	0.000184459
MSTRG.5382.1	NA	NA	NA	NA	NA	NA	NA	NA	Novel proteoforms (BRAKER)	#DIV/0!
MSTRG.10660.1	3.22e-05	2.67e-05	2.9e-05	2.9e-05	2.9e-05	2.9e-05	2.9e-05	2.9e-05	Novel proteoforms (BRAKER)	2.91125e-05
MSTRG.5239.1	7.11807e-05	6.74667e-05	6.9e-05	6.9e-05	6.9e-05	6.9e-05	6.9e-05	6.9e-05	Novel proteoforms (BRAKER)	6.90809e-05
ACOC_0000047401-mRNA-1	7.68333e-05	5.58667e-05	6.6e-05	6.6e-05	6.3e-05	6.5e-05	6.5e-05	6.4e-05	Reference proteins (WormBase)	6.52125e-05
ACOC_0000604701-mRNA-1	0.00307745	NA	NA	NA	NA	NA	NA	NA	Reference proteins (WormBase)	0.00307745
ACOC_0000210801-mRNA-1	NA	NA	NA	NA	NA	NA	NA	NA	Reference proteins (WormBase)	#DIV/0!
MSTRG.644.2	0.000374808	0.000123249	0.000249	0.000249	0.000207	0.000235	0.00023	0.000224	Novel proteoforms (BRAKER)	0.000236507
ACOC_0000319301-mRNA-1	0.000108191	0.000107795	0.000108	0.000108	0.000108	0.000108	0.000108	0.000108	Reference proteoforms (WormBase)	0.000107998
ACOC_0000763201-mRNA-1	0.0114924	0.0123328	0.011913	0.011913	0.012053	0.011959	0.011975	0.011996	Proteins from split genes (WormBase)	0.0119543
MSTRG.9584.1	0.000722099	0.000546044	0.000634	0.000634	0.000605	0.000624	0.000621	0.000617	Novel proteoforms (BRAKER)	0.000625393
MSTRG.6253.1	0.000272064	0.000323599	0.000298	0.000298	0.000306	0.000301	0.000302	0.000303	Novel proteoforms (BRAKER)	0.000300458
MSTRG.4998.1	0.00012172	8.40173e-05	0.000103	0.000103	9.7e-05	0.000101	0.0001	9.9e-05	Proteins from merged genes (BRAKER)	0.000101092
MSTRG.5509.1	NA	0.000286238	NA	NA	NA	NA	NA	NA	Novel proteoforms (BRAKER)	0.000286238
MSTRG.9991.1	0.000771739	0.000606217	0.000689	0.000689	0.000661	0.00068	0.000677	0.000673	Novel proteoforms (BRAKER)	0.00068087
ACOC_0000394101-mRNA-1	0.000119211	0.000136001	0.000128	0.000128	0.00013	0.000129	0.000129	0.000129	Reference proteins (WormBase)	0.000128526
MSTRG.5743.1	0.000130911	0.00249442	0.001313	0.001313	0.001707	0.001444	0.001488	0.001546	Novel proteoforms (BRAKER)	0.00142954
MSTRG.10077.1	8.33667e-05	9.55997e-05	8.9e-05	8.9e-05	9.2e-05	9e-05	9e-05	9.1e-05	Proteins from merged genes (BRAKER)	8.99958e-05
MSTRG.2692.1	NA	NA	NA	NA	NA	NA	NA	NA	Proteins from merged genes (BRAKER)	#DIV/0!
ACOC_0001338501-mRNA-1	0.00048792	0.000541514	0.000515	0.000515	0.000524	0.000518	0.000519	0.00052	Reference proteins (WormBase)	0.000517554
ACOC_0000231601-mRNA-1	0.000177037	0.000252842	0.000215	0.000215	0.000228	0.000219	0.000221	0.000222	Reference proteins (WormBase)	0.000218735
ACOC_0000406401-mRNA-1	0.00015431	0.000105612	0.00013	0.00013	0.000122	0.000127	0.000126	0.000125	Reference proteoforms (WormBase)	0.00012749
MSTRG.3019.1	NA	7.76e-05	NA	NA	NA	NA	NA	NA	Novel proteoforms (BRAKER)	7.76e-05
MSTRG.4636.2	0.000144649	0.000170615	0.000158	0.000158	0.000162	0.000159	0.00016	0.00016	Novel proteoforms (BRAKER)	0.000159033
MSTRG.7042.1	0.000188315	0.000223901	0.000206	0.000206	0.000212	0.000208	0.000209	0.00021	Novel proteoforms (BRAKER)	0.000207902
MSTRG.4924.1	NA	NA	NA	NA	NA	NA	NA	NA	Novel proteoforms (BRAKER)	#DIV/0!
MSTRG.5803.1	0.000143778	9.5511e-05	0.00012	0.00012	0.000112	0.000117	0.000116	0.000115	Novel proteoforms (BRAKER)	0.000117411
MSTRG.7815.1	8.45713e-05	5.93e-05	7.2e-05	7.2e-05	6.8e-05	7.1e-05	7e-05	6.9e-05	Novel proteoforms (BRAKER)	7.07339e-05
MSTRG.10152.1	0.000374607	9.84527e-05	0.000237	0.000237	0.000191	0.000221	0.000216	0.000209	Novel proteoforms (BRAKER)	0.000223007
ACOC_0000593501-mRNA-1	0.000148389	0.000164183	0.000156	0.000156	0.000159	0.000157	0.000157	0.000158	Reference proteoforms (WormBase)	0.000156946
ACOC_0001075101-mRNA-1	0.000179652	0.00013348	0.000157	0.000157	0.000149	0.000154	0.000153	0.000152	Reference proteins (WormBase)	0.000154392
ACOC_0000226601-mRNA-1	0.000973468	0.000551936	0.000763	0.000763	0.000692	0.000739	0.000731	0.000721	Reference proteins (WormBase)	0.0007418
MSTRG.2314.1	NA	6.93e-05	NA	NA	NA	NA	NA	NA	Novel proteoforms (BRAKER)	6.93e-05
MSTRG.1613.1	4.69e-05	5.825e-05	5.3e-05	5.3e-05	5.4e-05	5.3e-05	5.3e-05	5.4e-05	Novel proteoforms (BRAKER)	5.31438e-05
ACOC_0000986901-mRNA-1	3.19e-05	2.48667e-05	2.8e-05	2.8e-05	2.7e-05	2.8e-05	2.8e-05	2.8e-05	Reference proteoforms (WormBase)	2.79708e-05
MSTRG.12138.1	2.74e-05	2.24e-05	2.5e-05	2.5e-05	2.4e-05	2.5e-05	2.5e-05	2.4e-05	Novel proteoforms (BRAKER)	2.4725e-05
MSTRG.6273.1	8.26e-05	7.89333e-05	8.1e-05	8.1e-05	8e-05	8.1e-05	8e-05	8e-05	Novel proteoforms (BRAKER)	8.05667e-05
MSTRG.4560.1	5.46e-05	4.24e-05	4.9e-05	4.9e-05	4.6e-05	4.8e-05	4.8e-05	4.7e-05	Proteins from merged genes (BRAKER)	4.8e-05
MSTRG.7657.3	9.62563e-05	9.7949e-05	9.7e-05	9.7e-05	9.7e-05	9.7e-05	9.7e-05	9.7e-05	Novel proteoforms (BRAKER)	9.70257e-05
ACOC_0000539801-mRNA-1	0.000121622	0.000107738	0.000115	0.000115	0.000112	0.000114	0.000114	0.000113	Reference proteins (WormBase)	0.000114045
MSTRG.9886.1	NA	NA	NA	NA	NA	NA	NA	NA	Proteins from merged genes (BRAKER)	#DIV/0!
ACOC_0001291101-mRNA-1	0.000503923	0.000366946	0.000435	0.000435	0.000413	0.000428	0.000425	0.000422	Reference proteins (WormBase)	0.000428609
MSTRG.9197.1	2.51667e-05	3.82667e-05	3.2e-05	3.2e-05	3.4e-05	3.2e-05	3.3e-05	3.3e-05	Novel proteoforms (BRAKER)	3.24292e-05
ACOC_0000387501-mRNA-1	NA	NA	NA	NA	NA	NA	NA	NA	Reference proteoforms (WormBase)	#DIV/0!
MSTRG.5272.1	0.000166334	0.000180584	0.000173	0.000173	0.000176	0.000174	0.000175	0.000175	Novel proteoforms (BRAKER)	0.000174115
ACOC_0000070201-mRNA-1	6.73e-05	4.40667e-05	5.6e-05	5.6e-05	5.2e-05	5.4e-05	5.4e-05	5.3e-05	Reference proteins (WormBase)	5.45458e-05
MSTRG.8865.2	7.76333e-06	8.15963e-05	4.5e-05	4.5e-05	5.7e-05	4.9e-05	5e-05	5.2e-05	Novel proteoforms (BRAKER)	4.842e-05
MSTRG.6929.1	NA	0.000813794	NA	NA	NA	NA	NA	NA	Novel proteoforms (BRAKER)	0.000813794
MSTRG.1760.1	NA	NA	NA	NA	NA	NA	NA	NA	Novel proteoforms (BRAKER)	#DIV/0!
ACOC_0000184801-mRNA-1	0.00059041	0.000548398	0.000569	0.000569	0.000562	0.000567	0.000566	0.000565	Reference proteoforms (WormBase)	0.000567101
MSTRG.12821.3	NA	NA	NA	NA	NA	NA	NA	NA	Novel proteoforms (BRAKER)	#DIV/0!
MSTRG.12821.1	NA	NA	NA	NA	NA	NA	NA	NA	Novel proteoforms (BRAKER)	#DIV/0!
ACOC_0000515601-mRNA-1	0.000524298	0.000562686	0.000543	0.000543	0.00055	0.000546	0.000546	0.000547	Reference proteins (WormBase)	0.000545248
MSTRG.8575.1	1.426e-05	7.86e-06	1.1e-05	1.1e-05	1e-05	1.1e-05	1.1e-05	1e-05	Novel proteoforms (BRAKER)	1.0765e-05
ACOC_0001225401-mRNA-1	0.000167217	0.00014844	0.000158	0.000158	0.000155	0.000157	0.000156	0.000156	Reference proteoforms (WormBase)	0.000156957
ACOC_0001147101-mRNA-1	6.15333e-05	4.51333e-05	5.3e-05	5.3e-05	5.1e-05	5.2e-05	5.2e-05	5.2e-05	Reference proteins (WormBase)	5.24583e-05
ACOC_0000147301-mRNA-1	0.00256082	0.0022949	0.002428	0.002428	0.002384	0.002413	0.002408	0.002402	Reference proteins (WormBase)	0.00241484
MSTRG.467.1	7.64e-05	9.50357e-05	8.6e-05	8.6e-05	8.9e-05	8.7e-05	8.7e-05	8.8e-05	Novel proteoforms (BRAKER)	8.68045e-05
ACOC_0000806001-mRNA-1	0.000101929	NA	NA	NA	NA	NA	NA	NA	Proteins from split genes (WormBase)	0.000101929
MSTRG.5828.1	4.20667e-05	3.76333e-05	4e-05	4e-05	3.9e-05	4e-05	4e-05	3.9e-05	Novel proteoforms (BRAKER)	3.97125e-05
ACOC_0000603601-mRNA-1	0.000956203	0.00114171	0.001049	0.001049	0.00108	0.001059	0.001063	0.001067	Reference proteins (WormBase)	0.00105811
MSTRG.6284.1	3.025e-06	2.985e-06	3e-06	3e-06	3e-06	3e-06	3e-06	3e-06	Novel proteoforms (BRAKER)	3.00125e-06
ACOC_0000296001-mRNA-1	0.00210845	0.00151675	0.001813	0.001813	0.001714	0.00178	0.001769	0.001754	Proteins from split genes (WormBase)	0.00178352
MSTRG.2875.1	0.000403014	8.83e-05	0.000246	0.000246	0.000193	0.000228	0.000222	0.000215	Proteins from merged genes (BRAKER)	0.000230164
MSTRG.753.1	4.77667e-05	3.86333e-05	4.3e-05	4.3e-05	4.2e-05	4.3e-05	4.3e-05	4.2e-05	Novel proteoforms (BRAKER)	4.28e-05
MSTRG.6767.1	0.000151377	0.000138304	0.000145	0.000145	0.000143	0.000144	0.000144	0.000144	Novel proteoforms (BRAKER)	0.000144335
MSTRG.6464.1	0.000554118	0.000873761	0.000714	0.000714	0.000767	0.000732	0.000738	0.000746	Novel proteoforms (BRAKER)	0.00072986
MSTRG.8331.1	NA	NA	NA	NA	NA	NA	NA	NA	Novel proteoforms (BRAKER)	#DIV/0!
ACOC_0000424001-mRNA-1	4.65667e-05	4.03e-05	4.3e-05	4.3e-05	4.2e-05	4.3e-05	4.3e-05	4.3e-05	Reference proteoforms (WormBase)	4.29833e-05
MSTRG.3914.1	0.000185163	0.000167366	0.000176	0.000176	0.000173	0.000175	0.000175	0.000175	Novel proteins (BRAKER)	0.000175316
MSTRG.6777.1	8.56e-05	9.3368e-05	8.9e-05	8.9e-05	9.1e-05	9e-05	9e-05	9e-05	Novel proteoforms (BRAKER)	8.9746e-05
MSTRG.7642.1	NA	NA	NA	NA	NA	NA	NA	NA	Novel proteoforms (BRAKER)	#DIV/0!
MSTRG.1661.1	7.96667e-05	7.09333e-05	7.5e-05	7.5e-05	7.4e-05	7.5e-05	7.5e-05	7.4e-05	Novel proteoforms (BRAKER)	7.4825e-05
MSTRG.6769.1	5.97e-05	4.38e-05	5.2e-05	5.2e-05	4.9e-05	5.1e-05	5.1e-05	5e-05	Novel proteoforms (BRAKER)	5.10625e-05
MSTRG.367.1	NA	NA	NA	NA	NA	NA	NA	NA	Novel proteoforms (BRAKER)	#DIV/0!
MSTRG.12714.1	NA	NA	NA	NA	NA	NA	NA	NA	Novel proteoforms (BRAKER)	#DIV/0!
ACOC_0000964401-mRNA-1	3.73333e-05	3.99667e-05	3.9e-05	3.9e-05	3.9e-05	3.9e-05	3.9e-05	3.9e-05	Reference proteoforms (WormBase)	3.89125e-05
MSTRG.1202.3	0.000258937	0.000295773	0.000277	0.000277	0.000283	0.000279	0.00028	0.000281	Proteins from merged genes (BRAKER)	0.000278964
MSTRG.312.1	0.000237597	0.000253628	0.000246	0.000246	0.000248	0.000247	0.000247	0.000247	Proteins from merged genes (BRAKER)	0.000246528
MSTRG.1115.1	0.00084896	0.000417958	0.000633	0.000633	0.000562	0.00061	0.000602	0.000591	Novel proteoforms (BRAKER)	0.00061224
MSTRG.6626.1	NA	0.00115656	NA	NA	NA	NA	NA	NA	Novel proteoforms (BRAKER)	0.00115656
MSTRG.4806.1	0.000897683	0.00103795	0.000968	0.000968	0.000991	0.000976	0.000978	0.000982	Novel proteoforms (BRAKER)	0.000974829
ACOC_0000537701-mRNA-1	3.71333e-05	6.875e-06	2.2e-05	2.2e-05	1.7e-05	2e-05	2e-05	1.9e-05	Reference proteins (WormBase)	2.0501e-05
MSTRG.12306.1	2.55333e-05	6.67873e-05	4.6e-05	4.6e-05	5.3e-05	4.8e-05	4.9e-05	5e-05	Novel proteoforms (BRAKER)	4.80401e-05
MSTRG.5519.1	1.43e-05	1.27667e-05	1.4e-05	1.4e-05	1.3e-05	1.3e-05	1.3e-05	1.3e-05	Novel proteoforms (BRAKER)	1.33833e-05
MSTRG.6587.1	1.705e-05	1.36233e-05	1.5e-05	1.5e-05	1.5e-05	1.5e-05	1.5e-05	1.5e-05	Novel proteoforms (BRAKER)	1.50842e-05
MSTRG.6190.1	0.000505783	0.00070575	0.000606	0.000606	0.000639	0.000617	0.000621	0.000626	Novel proteoforms (BRAKER)	0.000615817
MSTRG.8108.1	4.02667e-05	3.18e-05	3.6e-05	3.6e-05	3.5e-05	3.6e-05	3.5e-05	3.5e-05	Novel proteoforms (BRAKER)	3.56333e-05
MSTRG.11608.2	NA	NA	NA	NA	NA	NA	NA	NA	Novel proteoforms (BRAKER)	#DIV/0!
MSTRG.11831.1	1.4e-06	8.64333e-06	5e-06	5e-06	6e-06	5e-06	6e-06	6e-06	Novel proteoforms (BRAKER)	5.38042e-06
MSTRG.533.1	2.15e-05	2.93e-05	2.5e-05	2.5e-05	2.7e-05	2.6e-05	2.6e-05	2.6e-05	Novel proteoforms (BRAKER)	2.5725e-05
MSTRG.8741.1	6.34333e-06	1.30533e-05	1e-05	1e-05	1.1e-05	1e-05	1e-05	1e-05	Proteins from merged genes (BRAKER)	1.00496e-05
MSTRG.805.1	7.58333e-06	1.201e-05	1e-05	1e-05	1.1e-05	1e-05	1e-05	1e-05	Novel proteoforms (BRAKER)	1.00742e-05
MSTRG.5770.1	NA	NA	NA	NA	NA	NA	NA	NA	Novel proteins (BRAKER)	#DIV/0!
ACOC_0000125501-mRNA-1	NA	6.15e-05	NA	NA	NA	NA	NA	NA	Reference proteoforms (WormBase)	6.15e-05
MSTRG.6307.3	0.000224168	1.689e-05	0.000121	0.000121	8.6e-05	0.000109	0.000105	0.0001	Novel proteoforms (BRAKER)	0.000110382
MSTRG.6553.1	5.29e-06	0.00371772	0.001862	0.001862	0.00248	0.002068	0.002137	0.002228	Novel proteoforms (BRAKER)	0.002045
MSTRG.277.1	2.5e-05	1.09e-05	1.8e-05	1.8e-05	1.6e-05	1.7e-05	1.7e-05	1.7e-05	Proteins from merged genes (BRAKER)	1.73625e-05
ACOC_0001231901-mRNA-1	NA	3.38e-05	NA	NA	NA	NA	NA	NA	Reference proteins (WormBase)	3.38e-05
MSTRG.7666.1	5.376e-05	8.805e-06	3.1e-05	3.1e-05	2.4e-05	2.9e-05	2.8e-05	2.7e-05	Novel proteoforms (BRAKER)	2.90706e-05
ACOC_0000777901-mRNA-1	NA	NA	NA	NA	NA	NA	NA	NA	Reference proteoforms (WormBase)	#DIV/0!
ACOC_0000901201-mRNA-1	0.00364148	0.00340415	0.003523	0.003523	0.003483	0.00351	0.003505	0.003499	Reference proteins (WormBase)	0.00351108
MSTRG.7671.1	1.0675e-05	1.75e-05	1.4e-05	1.4e-05	1.5e-05	1.4e-05	1.5e-05	1.5e-05	Novel proteoforms (BRAKER)	1.43969e-05
MSTRG.1911.1	6.965e-06	5.21667e-06	6e-06	6e-06	6e-06	6e-06	6e-06	6e-06	Proteins from merged genes (BRAKER)	6.02271e-06
MSTRG.9874.1	0.000452204	0.000501256	0.000477	0.000477	0.000485	0.000479	0.00048	0.000482	Novel proteoforms (BRAKER)	0.000479183
MSTRG.2604.1	0.000107256	6.00993e-05	8.4e-05	8.4e-05	7.6e-05	8.1e-05	8e-05	7.9e-05	Novel proteoforms (BRAKER)	8.14194e-05
MSTRG.2223.2	NA	7.83e-05	NA	NA	NA	NA	NA	NA	Novel proteoforms (BRAKER)	7.83e-05
MSTRG.7385.1	6.355e-05	5.265e-05	5.8e-05	5.8e-05	5.6e-05	5.7e-05	5.7e-05	5.7e-05	Proteins from merged genes (BRAKER)	5.74e-05
MSTRG.10742.1	0.00034573	0.000296002	0.000321	0.000321	0.000313	0.000318	0.000317	0.000316	Proteins from merged genes (BRAKER)	0.000318467
MSTRG.12022.1	1.05067e-05	9.14e-06	1e-05	1e-05	1e-05	1e-05	1e-05	1e-05	Novel proteoforms (BRAKER)	9.95584e-06
MSTRG.9580.1	NA	NA	NA	NA	NA	NA	NA	NA	Novel proteoforms (BRAKER)	#DIV/0!
ACOC_0001239801-mRNA-1	0.00010982	NA	NA	NA	NA	NA	NA	NA	Proteins from split genes (WormBase)	0.00010982
ACOC_0001067301-mRNA-1	0.000214612	0.000210779	0.000213	0.000213	0.000212	0.000212	0.000212	0.000212	Reference proteins (WormBase)	0.000212424
MSTRG.5318.1	5.99333e-06	0.000167127	8.7e-05	8.7e-05	0.000113	9.6e-05	9.8e-05	0.000102	Proteins from merged genes (BRAKER)	9.4515e-05
MSTRG.8265.1	NA	1.33e-05	NA	NA	NA	NA	NA	NA	Novel proteoforms (BRAKER)	1.33e-05
MSTRG.4622.4	4.80667e-05	8.22667e-05	6.5e-05	6.5e-05	7.1e-05	6.7e-05	6.8e-05	6.9e-05	Proteins from merged genes (BRAKER)	6.69167e-05
MSTRG.7692.1	8.76e-05	6.105e-05	7.4e-05	7.4e-05	7e-05	7.3e-05	7.2e-05	7.2e-05	Novel proteoforms (BRAKER)	7.29563e-05
MSTRG.5228.1	4.7e-06	5.6e-06	5e-06	5e-06	5e-06	5e-06	5e-06	5e-06	Novel proteoforms (BRAKER)	5.0375e-06
MSTRG.5922.1	NA	NA	NA	NA	NA	NA	NA	NA	Novel proteoforms (BRAKER)	#DIV/0!
MSTRG.12194.1	5.275e-05	4.645e-05	5e-05	5e-05	4.9e-05	4.9e-05	4.9e-05	4.9e-05	Novel proteoforms (BRAKER)	4.94e-05
ACOC_0000710401-mRNA-1	0.000100324	8.08497e-05	9.1e-05	9.1e-05	8.7e-05	9e-05	8.9e-05	8.9e-05	Reference proteins (WormBase)	8.97717e-05
MSTRG.57.1	5.41667e-06	3.2705e-05	1.9e-05	1.9e-05	2.4e-05	2.1e-05	2.1e-05	2.2e-05	Novel proteoforms (BRAKER)	2.05152e-05
MSTRG.7088.1	NA	NA	NA	NA	NA	NA	NA	NA	Novel proteoforms (BRAKER)	#DIV/0!
MSTRG.12154.1	6.04e-05	NA	NA	NA	NA	NA	NA	NA	Novel proteoforms (BRAKER)	6.04e-05
MSTRG.9353.1	2.12e-05	NA	NA	NA	NA	NA	NA	NA	Novel proteoforms (BRAKER)	2.12e-05
ACOC_0000216801-mRNA-1	9.66667e-06	1.53e-05	1.2e-05	1.2e-05	1.3e-05	1.3e-05	1.3e-05	1.3e-05	Proteins from split genes (WormBase)	1.26208e-05
MSTRG.2065.2	8.42e-06	2.46e-06	5e-06	5e-06	4e-06	5e-06	5e-06	5e-06	Proteins from merged genes (BRAKER)	4.985e-06
ACOC_0000819901-mRNA-1	NA	0.000103524	NA	NA	NA	NA	NA	NA	Reference proteoforms (WormBase)	0.000103524
MSTRG.666.1	NA	NA	NA	NA	NA	NA	NA	NA	Novel proteoforms (BRAKER)	#DIV/0!
MSTRG.12960.2	NA	0.000824608	NA	NA	NA	NA	NA	NA	Novel proteoforms (BRAKER)	0.000824608
MSTRG.7014.1	1.47e-05	NA	NA	NA	NA	NA	NA	NA	Novel proteoforms (BRAKER)	1.47e-05
MSTRG.8096.1	1.6e-06	2.925e-06	2e-06	2e-06	2e-06	2e-06	2e-06	2e-06	Proteins from merged genes (BRAKER)	2.06562e-06
ACOC_0000109201-mRNA-1	9.17e-05	0.000105833	9.9e-05	9.9e-05	0.000101	0.0001	0.0001	0.0001	Reference proteins (WormBase)	9.95666e-05
ACOC_0001133701-mRNA-1	6.885e-06	4.23e-06	6e-06	6e-06	5e-06	5e-06	5e-06	5e-06	Reference proteins (WormBase)	5.38938e-06
MSTRG.12519.1	5.61667e-06	7.28e-06	6e-06	6e-06	7e-06	7e-06	7e-06	7e-06	Novel proteoforms (BRAKER)	6.61208e-06
MSTRG.12284.1	1.78e-05	NA	NA	NA	NA	NA	NA	NA	Novel proteoforms (BRAKER)	1.78e-05
MSTRG.11815.1	1.45e-05	1.22e-05	1.3e-05	1.3e-05	1.3e-05	1.3e-05	1.3e-05	1.3e-05	Novel proteoforms (BRAKER)	1.30875e-05
MSTRG.5631.2	9.22e-06	NA	NA	NA	NA	NA	NA	NA	Proteins from merged genes (BRAKER)	9.22e-06
MSTRG.8420.1	2.89e-05	2.115e-05	2.5e-05	2.5e-05	2.4e-05	2.5e-05	2.4e-05	2.4e-05	Proteins from merged genes (BRAKER)	2.46312e-05
MSTRG.6601.1	1.14e-06	2.25e-06	2e-06	2e-06	2e-06	2e-06	2e-06	2e-06	Novel proteoforms (BRAKER)	1.92375e-06
MSTRG.1094.1	NA	NA	NA	NA	NA	NA	NA	NA	Novel proteoforms (BRAKER)	#DIV/0!
ACOC_0001083401-mRNA-1	1.97723e-05	3.21333e-05	2.6e-05	2.6e-05	2.8e-05	2.7e-05	2.7e-05	2.7e-05	Reference proteins (WormBase)	2.66132e-05
MSTRG.4830.1	NA	NA	NA	NA	NA	NA	NA	NA	Novel proteoforms (BRAKER)	#DIV/0!
MSTRG.7607.1	NA	NA	NA	NA	NA	NA	NA	NA	Novel proteoforms (BRAKER)	#DIV/0!
MSTRG.7981.1	1.2315e-05	NA	NA	NA	NA	NA	NA	NA	Novel proteoforms (BRAKER)	1.2315e-05
MSTRG.10283.1	NA	0.000154537	NA	NA	NA	NA	NA	NA	Novel proteoforms (BRAKER)	0.000154537
MSTRG.10159.1	7.63333e-06	1.07633e-05	9e-06	9e-06	1e-05	9e-06	9e-06	1e-05	Novel proteoforms (BRAKER)	9.29958e-06
MSTRG.6347.1	5.25e-06	NA	NA	NA	NA	NA	NA	NA	Proteins from merged genes (BRAKER)	5.25e-06
MSTRG.4508.1	1.795e-05	1.58e-05	1.7e-05	1.7e-05	1.7e-05	1.7e-05	1.7e-05	1.7e-05	Novel proteoforms (BRAKER)	1.69688e-05
MSTRG.6948.1	2.005e-06	1.98e-06	2e-06	2e-06	2e-06	2e-06	2e-06	2e-06	Novel proteins (BRAKER)	1.99812e-06
ACOC_0000646901-mRNA-1	1.99e-05	1.31333e-05	1.7e-05	1.7e-05	1.5e-05	1.6e-05	1.6e-05	1.6e-05	Proteins from split genes (WormBase)	1.62542e-05
MSTRG.1019.1	NA	NA	NA	NA	NA	NA	NA	NA	Novel proteoforms (BRAKER)	#DIV/0!
MSTRG.4559.1	2.81667e-05	4.67667e-05	3.7e-05	3.7e-05	4.1e-05	3.9e-05	3.9e-05	3.9e-05	Novel proteoforms (BRAKER)	3.83667e-05
MSTRG.4946.1	NA	NA	NA	NA	NA	NA	NA	NA	Novel proteoforms (BRAKER)	#DIV/0!
ACOC_0000203401-mRNA-1	NA	2.79e-05	NA	NA	NA	NA	NA	NA	Reference proteins (WormBase)	2.79e-05
MSTRG.871.1	NA	NA	NA	NA	NA	NA	NA	NA	Novel proteoforms (BRAKER)	#DIV/0!
MSTRG.2695.2	1.845e-05	1.03067e-05	1.4e-05	1.4e-05	1.3e-05	1.4e-05	1.4e-05	1.4e-05	Novel proteoforms (BRAKER)	1.39696e-05
MSTRG.11505.1	NA	3.54e-05	NA	NA	NA	NA	NA	NA	Novel proteoforms (BRAKER)	3.54e-05
MSTRG.10599.1	5.89003e-05	1.2375e-05	3.6e-05	3.6e-05	2.8e-05	3.3e-05	3.2e-05	3.1e-05	Novel proteoforms (BRAKER)	3.34094e-05
MSTRG.491.1	3.86e-06	5.15e-06	5e-06	5e-06	5e-06	5e-06	5e-06	5e-06	Novel proteoforms (BRAKER)	4.87625e-06
MSTRG.2898.1	NA	7.05e-06	NA	NA	NA	NA	NA	NA	Novel proteoforms (BRAKER)	7.05e-06
MSTRG.5552.1	1.02e-05	NA	NA	NA	NA	NA	NA	NA	Novel proteoforms (BRAKER)	1.02e-05
ACOC_0000016901-mRNA-1	NA	NA	NA	NA	NA	NA	NA	NA	Reference proteoforms (WormBase)	#DIV/0!
ACOC_0000808501-mRNA-1	5.175e-06	1.404e-05	1e-05	1e-05	1.1e-05	1e-05	1e-05	1e-05	Reference proteoforms (WormBase)	1.00269e-05
MSTRG.9313.1	3.21e-06	5.16667e-06	4e-06	4e-06	5e-06	4e-06	4e-06	4e-06	Novel proteoforms (BRAKER)	4.17208e-06
MSTRG.11025.1	5.385e-06	4.475e-06	5e-06	5e-06	5e-06	5e-06	5e-06	5e-06	Novel proteoforms (BRAKER)	4.9825e-06
MSTRG.2526.1	NA	NA	NA	NA	NA	NA	NA	NA	Novel proteoforms (BRAKER)	#DIV/0!
MSTRG.9548.1	NA	NA	NA	NA	NA	NA	NA	NA	Proteins from merged genes (BRAKER)	#DIV/0!
MSTRG.12167.1	0.000176131	NA	NA	NA	NA	NA	NA	NA	Novel proteoforms (BRAKER)	0.000176131
MSTRG.3968.1	NA	NA	NA	NA	NA	NA	NA	NA	Novel proteoforms (BRAKER)	#DIV/0!
MSTRG.11571.1	1.8745e-05	1.887e-05	1.9e-05	1.9e-05	1.9e-05	1.9e-05	1.9e-05	1.9e-05	Novel proteoforms (BRAKER)	1.89519e-05
MSTRG.7923.1	NA	NA	NA	NA	NA	NA	NA	NA	Novel proteoforms (BRAKER)	#DIV/0!
MSTRG.12462.1	NA	NA	NA	NA	NA	NA	NA	NA	Novel proteoforms (BRAKER)	#DIV/0!
MSTRG.4755.1	NA	9.43e-06	NA	NA	NA	NA	NA	NA	Proteins from merged genes (BRAKER)	9.43e-06
ACOC_0000197301-mRNA-1	5.95e-05	NA	NA	NA	NA	NA	NA	NA	Reference proteins (WormBase)	5.95e-05
ACOC_0000689001-mRNA-1	NA	NA	NA	NA	NA	NA	NA	NA	Reference proteins (WormBase)	#DIV/0!
MSTRG.8694.1	NA	NA	NA	NA	NA	NA	NA	NA	Novel proteoforms (BRAKER)	#DIV/0!
MSTRG.10416.1	NA	NA	NA	NA	NA	NA	NA	NA	Novel proteoforms (BRAKER)	#DIV/0!
MSTRG.12406.1	NA	NA	NA	NA	NA	NA	NA	NA	Proteins from merged genes (BRAKER)	#DIV/0!
MSTRG.3126.1	NA	NA	NA	NA	NA	NA	NA	NA	Proteins from merged genes (BRAKER)	#DIV/0!
MSTRG.7124.1	NA	1.409e-05	NA	NA	NA	NA	NA	NA	Novel proteins (BRAKER)	1.409e-05
MSTRG.6381.1	2e-06	2.12e-06	2e-06	2e-06	2e-06	2e-06	2e-06	2e-06	Novel proteoforms (BRAKER)	2.015e-06
MSTRG.764.1	0.00144501	NA	NA	NA	NA	NA	NA	NA	Novel proteoforms (BRAKER)	0.00144501
ACOC_0001237901-mRNA-1	0.00125652	0.00132424	0.00129	0.00129	0.001302	0.001294	0.001295	0.001297	Reference proteins (WormBase)	0.00129359
MSTRG.5116.1	1.44e-06	2.605e-06	2e-06	2e-06	2e-06	2e-06	2e-06	2e-06	Novel proteoforms (BRAKER)	2.00562e-06
MSTRG.9614.1	5.48e-06	3.3e-06	4e-06	4e-06	4e-06	4e-06	4e-06	4e-06	Novel proteoforms (BRAKER)	4.0975e-06
ACOC_0000620301-mRNA-1	4.39e-06	NA	NA	NA	NA	NA	NA	NA	Reference proteoforms (WormBase)	4.39e-06
MSTRG.6788.1	7.16e-06	2.0945e-05	1.4e-05	1.4e-05	1.6e-05	1.5e-05	1.5e-05	1.5e-05	Novel proteoforms (BRAKER)	1.46381e-05
MSTRG.9101.2	2.9e-05	3.55e-05	3.2e-05	3.2e-05	3.3e-05	3.3e-05	3.3e-05	3.3e-05	Novel proteoforms (BRAKER)	3.25625e-05
MSTRG.4574.2	NA	NA	NA	NA	NA	NA	NA	NA	Novel proteoforms (BRAKER)	#DIV/0!
MSTRG.1904.1	0.000153172	2.3e-05	8.8e-05	8.8e-05	6.6e-05	8.1e-05	7.8e-05	7.5e-05	Novel proteoforms (BRAKER)	8.15215e-05
MSTRG.10123.1	NA	4.86e-06	NA	NA	NA	NA	NA	NA	Novel proteoforms (BRAKER)	4.86e-06
MSTRG.10853.1	NA	NA	NA	NA	NA	NA	NA	NA	Novel proteoforms (BRAKER)	#DIV/0!
MSTRG.993.1	0.000492328	0.000618908	0.000556	0.000556	0.000577	0.000563	0.000565	0.000568	Novel proteoforms (BRAKER)	0.000562029
ACOC_0000763301-mRNA-1	0.00264123	0.00252795	0.002585	0.002585	0.002566	0.002578	0.002576	0.002573	Proteins from split genes (WormBase)	0.00257902
MSTRG.3189.1	0.00463982	0.00338685	0.004013	0.004013	0.003805	0.003944	0.003921	0.00389	Novel proteoforms (BRAKER)	0.00395158
ACOC_0001286901-mRNA-1	NA	NA	NA	NA	NA	NA	NA	NA	Reference proteoforms (WormBase)	#DIV/0!
MSTRG.12582.1	NA	0.000686363	NA	NA	NA	NA	NA	NA	Novel proteoforms (BRAKER)	0.000686363
ACOC_0000288001-mRNA-1	0.000432507	0.000366408	0.000399	0.000399	0.000388	0.000396	0.000395	0.000393	Reference proteins (WormBase)	0.000396114
ACOC_0000632901-mRNA-1	0.00747311	0.00664684	0.00706	0.00706	0.006922	0.007014	0.006999	0.006978	Reference proteins (WormBase)	0.00701912
MSTRG.5691.1	9.74605e-05	8.5e-05	9.1e-05	9.1e-05	8.9e-05	9.1e-05	9e-05	9e-05	Novel proteoforms (BRAKER)	9.05576e-05
ACOC_0000637601-mRNA-1	0.000147154	0.000170721	0.000159	0.000159	0.000163	0.00016	0.000161	0.000161	Reference proteoforms (WormBase)	0.000160109
MSTRG.7191.1	0.00109533	0.000794574	0.000945	0.000945	0.000895	0.000928	0.000923	0.000915	Novel proteoforms (BRAKER)	0.000930113
MSTRG.1485.1	0.000760164	0.000272282	0.000516	0.000516	0.000435	0.000489	0.00048	0.000468	Novel proteoforms (BRAKER)	0.000492056
MSTRG.7320.1	4.77333e-05	4.51333e-05	4.6e-05	4.6e-05	4.6e-05	4.6e-05	4.6e-05	4.6e-05	Novel proteoforms (BRAKER)	4.61083e-05
MSTRG.8904.3	0.000135198	0.00011019	0.000123	0.000123	0.000119	0.000121	0.000121	0.00012	Novel proteoforms (BRAKER)	0.000121549
MSTRG.1902.1	0.000962072	0.000765801	0.000864	0.000864	0.000831	0.000853	0.000849	0.000845	Novel proteoforms (BRAKER)	0.000854234
MSTRG.2150.1	0.000411542	0.000333756	0.000373	0.000373	0.00036	0.000368	0.000367	0.000365	Novel proteoforms (BRAKER)	0.000368912
MSTRG.5022.1	1.0075e-05	1.35267e-05	1.2e-05	1.2e-05	1.2e-05	1.2e-05	1.2e-05	1.2e-05	Proteins from merged genes (BRAKER)	1.19502e-05
MSTRG.12210.1	0.00883251	0.00769358	0.008263	0.008263	0.008073	0.0082	0.008179	0.008151	Novel proteoforms (BRAKER)	0.00820689
ACOC_0001250301-mRNA-1	0.00870077	0.00754299	0.008122	0.008122	0.007929	0.008058	0.008036	0.008008	Reference proteoforms (WormBase)	0.00806485
MSTRG.819.1	0.000327323	0.000332085	0.00033	0.00033	0.00033	0.00033	0.00033	0.00033	Novel proteoforms (BRAKER)	0.000329926
MSTRG.7162.1	0.00273275	0.00271137	0.002722	0.002722	0.002718	0.002721	0.00272	0.00272	Novel proteoforms (BRAKER)	0.00272089
ACOC_0000702401-mRNA-1	0.00174471	0.00177707	0.001761	0.001761	0.001766	0.001763	0.001763	0.001764	Reference proteoforms (WormBase)	0.00176247
ACOC_0001088401-mRNA-1	0.00677177	0.00573248	0.006252	0.006252	0.006079	0.006194	0.006175	0.006149	Reference proteins (WormBase)	0.00620066
MSTRG.12652.1	0.000776057	0.000887436	0.000832	0.000832	0.00085	0.000838	0.00084	0.000843	Novel proteoforms (BRAKER)	0.000837312
MSTRG.11563.1	0.00172976	0.00192218	0.001826	0.001826	0.001858	0.001837	0.00184	0.001845	Novel proteoforms (BRAKER)	0.00183549
MSTRG.10385.2	0.00104819	0.000969567	0.001009	0.001009	0.000996	0.001005	0.001003	0.001001	Proteins from merged genes (BRAKER)	0.00100509
MSTRG.6201.1	0.00127315	0.00127004	0.001272	0.001272	0.001271	0.001271	0.001271	0.001271	Novel proteoforms (BRAKER)	0.0012714
MSTRG.7993.1	0.00110899	NA	NA	NA	NA	NA	NA	NA	Novel proteoforms (BRAKER)	0.00110899
MSTRG.8316.2	0.000994329	0.000790027	0.000892	0.000892	0.000858	0.000881	0.000877	0.000872	Proteins from merged genes (BRAKER)	0.000882045
MSTRG.1087.1	2.12e-05	2.10333e-05	2.1e-05	2.1e-05	2.1e-05	2.1e-05	2.1e-05	2.1e-05	Novel proteoforms (BRAKER)	2.10292e-05
MSTRG.9134.1	0.00139266	0.00116863	0.001281	0.001281	0.001243	0.001268	0.001264	0.001259	Novel proteoforms (BRAKER)	0.00126966
MSTRG.2398.1	2.12e-05	1.201e-05	1.7e-05	1.7e-05	1.5e-05	1.6e-05	1.6e-05	1.6e-05	Novel proteoforms (BRAKER)	1.62762e-05
MSTRG.498.1	0.000251562	0.000212296	0.000232	0.000232	0.000225	0.00023	0.000229	0.000228	Novel proteoforms (BRAKER)	0.000229982
MSTRG.5559.1	0.0068305	0.00534961	0.00609	0.00609	0.005843	0.006008	0.00598	0.005944	Novel proteoforms (BRAKER)	0.00601689
ACOC_0000566701-mRNA-1	0.000304106	0.000354294	0.000329	0.000329	0.000338	0.000332	0.000333	0.000334	Proteins from split genes (WormBase)	0.000331675
MSTRG.394.1	0.000894801	0.00073743	0.000816	0.000816	0.00079	0.000807	0.000804	0.000801	Proteins from merged genes (BRAKER)	0.000808279
MSTRG.12594.1	0.000426679	0.000386406	0.000407	0.000407	0.0004	0.000404	0.000404	0.000403	Novel proteoforms (BRAKER)	0.000404761
MSTRG.1133.1	3.88667e-05	4.33333e-05	4.1e-05	4.1e-05	4.2e-05	4.1e-05	4.1e-05	4.2e-05	Proteins from merged genes (BRAKER)	4.1275e-05
MSTRG.4367.1	0.00816437	0.00835678	0.008261	0.008261	0.008293	0.008271	0.008275	0.00828	Novel proteoforms (BRAKER)	0.00827027
MSTRG.8085.3	9.45823e-05	4.56e-05	7e-05	7e-05	6.2e-05	6.7e-05	6.6e-05	6.5e-05	Novel proteoforms (BRAKER)	6.75228e-05
MSTRG.12173.1	0.000126793	0.000104567	0.000116	0.000116	0.000112	0.000114	0.000114	0.000113	Novel proteoforms (BRAKER)	0.000114545
ACOC_0000772101-mRNA-1	4.825e-05	4.56e-05	4.7e-05	4.7e-05	4.6e-05	4.7e-05	4.7e-05	4.7e-05	Reference proteins (WormBase)	4.68563e-05
MSTRG.7497.1	NA	0.0016464	NA	NA	NA	NA	NA	NA	Novel proteoforms (BRAKER)	0.0016464
ACOC_0000027601-mRNA-1	0.00279143	0.0026751	0.002733	0.002733	0.002714	0.002727	0.002725	0.002722	Proteins from split genes (WormBase)	0.00272757
ACOC_0001298901-mRNA-1	0.00331229	NA	NA	NA	NA	NA	NA	NA	Reference proteins (WormBase)	0.00331229
MSTRG.4544.1	2.66333e-05	2.12667e-05	2.4e-05	2.4e-05	2.3e-05	2.4e-05	2.4e-05	2.3e-05	Novel proteoforms (BRAKER)	2.37375e-05
MSTRG.5162.1	6.97333e-05	8.24333e-05	7.6e-05	7.6e-05	7.8e-05	7.7e-05	7.7e-05	7.7e-05	Novel proteoforms (BRAKER)	7.66458e-05
MSTRG.2696.1	7.81733e-05	5.89667e-05	6.9e-05	6.9e-05	6.5e-05	6.8e-05	6.7e-05	6.7e-05	Novel proteoforms (BRAKER)	6.77675e-05
ACOC_0001306201-mRNA-1	0.000218633	0.000205309	0.000212	0.000212	0.00021	0.000211	0.000211	0.000211	Reference proteoforms (WormBase)	0.000211368
ACOC_0000697001-mRNA-1	0.000165523	0.000167596	0.000167	0.000167	0.000167	0.000167	0.000167	0.000167	Reference proteoforms (WormBase)	0.00016689
MSTRG.10341.1	0.000127442	NA	NA	NA	NA	NA	NA	NA	Novel proteoforms (BRAKER)	0.000127442
ACOC_0001142801-mRNA-1	0.0035912	0.00402501	0.003808	0.003808	0.00388	0.003832	0.00384	0.003851	Reference proteins (WormBase)	0.0038294
MSTRG.11875.1	0.000199291	0.000225767	0.000213	0.000213	0.000217	0.000214	0.000214	0.000215	Novel proteoforms (BRAKER)	0.000213882
MSTRG.10330.1	0.0013069	0.00135834	0.001333	0.001333	0.001341	0.001335	0.001336	0.001338	Novel proteoforms (BRAKER)	0.00133516
ACOC_0001263301-mRNA-1	0.000461367	0.0005734	0.000517	0.000517	0.000536	0.000524	0.000526	0.000528	Reference proteins (WormBase)	0.000522846
MSTRG.10066.1	NA	0.000372249	NA	NA	NA	NA	NA	NA	Novel proteoforms (BRAKER)	0.000372249
MSTRG.2187.1	0.00119515	0.0010206	0.001108	0.001108	0.001079	0.001098	0.001095	0.001091	Novel proteoforms (BRAKER)	0.00109934
MSTRG.1929.1	NA	NA	NA	NA	NA	NA	NA	NA	Novel proteoforms (BRAKER)	#DIV/0!
MSTRG.5800.1	9.6421e-05	8.57013e-05	9.1e-05	9.1e-05	8.9e-05	9e-05	9e-05	9e-05	Novel proteoforms (BRAKER)	9.03903e-05
MSTRG.639.1	2.90333e-05	4.91333e-05	3.9e-05	3.9e-05	4.2e-05	4e-05	4.1e-05	4.1e-05	Novel proteoforms (BRAKER)	4.00208e-05
MSTRG.9738.1	0.000176214	0.000186039	0.000181	0.000181	0.000183	0.000182	0.000182	0.000182	Proteins from merged genes (BRAKER)	0.000181657
MSTRG.11806.1	0.00015716	8.51993e-05	0.000121	0.000121	0.000109	0.000117	0.000116	0.000114	Novel proteoforms (BRAKER)	0.000117545
MSTRG.8267.1	2.88667e-05	2.42667e-05	2.7e-05	2.7e-05	2.6e-05	2.6e-05	2.6e-05	2.6e-05	Novel proteoforms (BRAKER)	2.63917e-05
MSTRG.1995.1	0.000283548	0.000310547	0.000297	0.000297	0.000302	0.000299	0.000299	0.0003	Novel proteoforms (BRAKER)	0.000298512
MSTRG.4924.3	0.000164064	0.000242163	0.000203	0.000203	0.000216	0.000207	0.000209	0.000211	Novel proteoforms (BRAKER)	0.000206903
ACOC_0000664101-mRNA-1	0.00116873	0.000713595	0.000941	0.000941	0.000865	0.000916	0.000907	0.000896	Reference proteins (WormBase)	0.000918541
MSTRG.6468.1	0.000830971	0.00119895	0.001015	0.001015	0.001076	0.001035	0.001042	0.001051	Novel proteoforms (BRAKER)	0.00103299
MSTRG.7285.1	0.000357177	NA	NA	NA	NA	NA	NA	NA	Novel proteoforms (BRAKER)	0.000357177
MSTRG.9005.1	NA	NA	NA	NA	NA	NA	NA	NA	Proteins from merged genes (BRAKER)	#DIV/0!
ACOC_0000554301-mRNA-1	0.000353163	0.000324809	0.000339	0.000339	0.000334	0.000337	0.000337	0.000336	Reference proteoforms (WormBase)	0.000337497
ACOC_0000909201-mRNA-1	0.000126069	7.05667e-05	9.8e-05	9.8e-05	8.9e-05	9.5e-05	9.4e-05	9.3e-05	Reference proteoforms (WormBase)	9.54545e-05
ACOC_0000645201-mRNA-1	0.00207466	0.0023819	0.002228	0.002228	0.002279	0.002245	0.002251	0.002259	Reference proteins (WormBase)	0.00224332
MSTRG.4109.1	0.000730996	0.000569585	0.00065	0.00065	0.000623	0.000641	0.000638	0.000634	Novel proteoforms (BRAKER)	0.000642073
MSTRG.9635.1	3.05667e-05	4.28e-05	3.7e-05	3.7e-05	3.9e-05	3.7e-05	3.8e-05	3.8e-05	Novel proteoforms (BRAKER)	3.74208e-05
MSTRG.2147.1	4.845e-05	NA	NA	NA	NA	NA	NA	NA	Novel proteoforms (BRAKER)	4.845e-05
MSTRG.6523.1	NA	NA	NA	NA	NA	NA	NA	NA	Novel proteoforms (BRAKER)	#DIV/0!
MSTRG.1259.3	3.90667e-05	4.27e-05	4.1e-05	4.1e-05	4.1e-05	4.1e-05	4.1e-05	4.1e-05	Proteins from merged genes (BRAKER)	4.09708e-05
ACOC_0000082701-mRNA-1	0.00123446	3.86667e-05	0.000637	0.000637	0.000437	0.00057	0.000548	0.000518	Proteins from split genes (WormBase)	0.000577515
MSTRG.6134.1	4.93333e-05	8.35877e-05	6.6e-05	6.6e-05	7.2e-05	6.8e-05	6.9e-05	7e-05	Novel proteoforms (BRAKER)	6.79901e-05
MSTRG.9357.1	0.000607512	0.000516498	0.000562	0.000562	0.000547	0.000557	0.000555	0.000553	Novel proteoforms (BRAKER)	0.000557501
MSTRG.2116.1	9.91667e-06	9.09667e-06	1e-05	1e-05	9e-06	9e-06	9e-06	9e-06	Novel proteoforms (BRAKER)	9.37667e-06
ACOC_0000917801-mRNA-1	4.93333e-05	4.96e-05	4.9e-05	4.9e-05	5e-05	4.9e-05	4.9e-05	4.9e-05	Reference proteoforms (WormBase)	4.92417e-05
MSTRG.7862.1	1.585e-05	1.58e-05	1.6e-05	1.6e-05	1.6e-05	1.6e-05	1.6e-05	1.6e-05	Proteins from merged genes (BRAKER)	1.59562e-05
ACOC_0000042001-mRNA-1	0.000369079	NA	NA	NA	NA	NA	NA	NA	Reference proteoforms (WormBase)	0.000369079
MSTRG.396.1	0.000181261	0.000234323	0.000208	0.000208	0.000217	0.000211	0.000212	0.000213	Novel proteoforms (BRAKER)	0.000210573
MSTRG.11170.1	0.000163989	0.000161608	0.000163	0.000163	0.000162	0.000163	0.000163	0.000163	Novel proteoforms (BRAKER)	0.000162825
ACOC_0001144701-mRNA-1	2.04e-05	NA	NA	NA	NA	NA	NA	NA	Reference proteoforms (WormBase)	2.04e-05
MSTRG.2795.1	0.000141888	2.86e-05	8.5e-05	8.5e-05	6.6e-05	7.9e-05	7.7e-05	7.4e-05	Novel proteins (BRAKER)	7.9561e-05
MSTRG.1844.1	0.000431236	0.000381822	0.000407	0.000407	0.000398	0.000404	0.000403	0.000402	Novel proteoforms (BRAKER)	0.000404257
MSTRG.11578.1	5.85e-05	5.95333e-05	5.9e-05	5.9e-05	5.9e-05	5.9e-05	5.9e-05	5.9e-05	Novel proteoforms (BRAKER)	5.90042e-05
MSTRG.7575.1	0.000640046	0.000504655	0.000572	0.000572	0.00055	0.000565	0.000562	0.000559	Novel proteoforms (BRAKER)	0.000565588
MSTRG.1729.1	4.24667e-05	4.74333e-05	4.5e-05	4.5e-05	4.6e-05	4.5e-05	4.5e-05	4.5e-05	Novel proteoforms (BRAKER)	4.51125e-05
MSTRG.685.1	2.08e-05	1.18567e-05	1.6e-05	1.6e-05	1.5e-05	1.6e-05	1.6e-05	1.5e-05	Novel proteoforms (BRAKER)	1.58321e-05
ACOC_0000515101-mRNA-1	0.00012448	0.000179135	0.000152	0.000152	0.000161	0.000155	0.000156	0.000157	Reference proteins (WormBase)	0.000154577
ACOC_0001103501-mRNA-1	0.00204339	0.00223615	0.00214	0.00214	0.002172	0.00215	0.002154	0.002159	Proteins from split genes (WormBase)	0.00214932
MSTRG.10764.2	NA	NA	NA	NA	NA	NA	NA	NA	Proteins from merged genes (BRAKER)	#DIV/0!
MSTRG.1132.1	0.000129555	9.83247e-05	0.000114	0.000114	0.000109	0.000112	0.000112	0.000111	Novel proteoforms (BRAKER)	0.000112485
MSTRG.8890.2	NA	NA	NA	NA	NA	NA	NA	NA	Proteins from merged genes (BRAKER)	#DIV/0!
MSTRG.12412.1	0.000189898	0.000198595	0.000194	0.000194	0.000196	0.000195	0.000195	0.000195	Novel proteoforms (BRAKER)	0.000194687
MSTRG.3624.1	NA	NA	NA	NA	NA	NA	NA	NA	Novel proteoforms (BRAKER)	#DIV/0!
MSTRG.3318.1	0.000120433	0.000194754	0.000158	0.000158	0.00017	0.000162	0.000163	0.000165	Novel proteoforms (BRAKER)	0.000161398
ACOC_0000276801-mRNA-1	2.24e-05	NA	NA	NA	NA	NA	NA	NA	Reference proteins (WormBase)	2.24e-05
MSTRG.4461.3	0.000187474	0.00014554	0.000167	0.000167	0.00016	0.000164	0.000163	0.000162	Novel proteoforms (BRAKER)	0.000164502
MSTRG.6288.1	1.96333e-05	2.60667e-05	2.3e-05	2.3e-05	2.4e-05	2.3e-05	2.3e-05	2.3e-05	Novel proteoforms (BRAKER)	2.30875e-05
MSTRG.2641.1	NA	NA	NA	NA	NA	NA	NA	NA	Novel proteoforms (BRAKER)	#DIV/0!
MSTRG.4585.2	9.31467e-05	8.40667e-05	8.9e-05	8.9e-05	8.7e-05	8.8e-05	8.8e-05	8.8e-05	Novel proteoforms (BRAKER)	8.82767e-05
MSTRG.1122.1	4.41333e-05	0.000109981	7.7e-05	7.7e-05	8.8e-05	8.1e-05	8.2e-05	8.4e-05	Novel proteoforms (BRAKER)	8.03893e-05
MSTRG.11614.1	6.73333e-05	0.000858572	0.000463	0.000463	0.000595	0.000507	0.000522	0.000541	Novel proteoforms (BRAKER)	0.000502113
MSTRG.662.1	3.58667e-06	3.32e-06	3e-06	3e-06	3e-06	3e-06	3e-06	3e-06	Novel proteoforms (BRAKER)	3.11333e-06
MSTRG.2154.1	NA	NA	NA	NA	NA	NA	NA	NA	Novel proteoforms (BRAKER)	#DIV/0!
ACOC_0000320001-mRNA-1	0.000436721	0.000453875	0.000445	0.000445	0.000448	0.000446	0.000447	0.000447	Reference proteoforms (WormBase)	0.000446075
MSTRG.1073.1	4.63e-06	NA	NA	NA	NA	NA	NA	NA	Novel proteoforms (BRAKER)	4.63e-06
ACOC_0000159801-mRNA-1	0.0023764	0.00181312	0.002095	0.002095	0.002001	0.002063	0.002053	0.002039	Reference proteins (WormBase)	0.00206694
MSTRG.5053.1	3.64203e-05	4.13e-06	2e-05	2e-05	1.5e-05	1.8e-05	1.8e-05	1.7e-05	Proteins from merged genes (BRAKER)	1.85688e-05
ACOC_0000485501-mRNA-1	0.000196937	0.000299373	0.000248	0.000248	0.000265	0.000254	0.000256	0.000258	Reference proteins (WormBase)	0.000253164
MSTRG.5903.1	4.435e-05	2.21e-05	3.3e-05	3.3e-05	3e-05	3.2e-05	3.2e-05	3.1e-05	Novel proteins (BRAKER)	3.21812e-05
MSTRG.301.1	0.000382941	0.00036458	0.000374	0.000374	0.000371	0.000373	0.000372	0.000372	Novel proteoforms (BRAKER)	0.00037294
MSTRG.4531.1	NA	4.04e-06	NA	NA	NA	NA	NA	NA	Novel proteoforms (BRAKER)	4.04e-06
ACOC_0000247901-mRNA-1	0.000114096	0.000157909	0.000136	0.000136	0.000143	0.000138	0.000139	0.00014	Proteins from split genes (WormBase)	0.000138001
MSTRG.7311.2	2.13667e-05	1.631e-05	1.9e-05	1.9e-05	1.8e-05	1.9e-05	1.8e-05	1.8e-05	Novel proteoforms (BRAKER)	1.85846e-05
ACOC_0000612201-mRNA-1	9.54585e-05	5.7e-05	7.6e-05	7.6e-05	7e-05	7.4e-05	7.3e-05	7.2e-05	Reference proteins (WormBase)	7.41823e-05
MSTRG.10877.1	1.49e-05	2.19333e-05	1.8e-05	1.8e-05	2e-05	1.9e-05	1.9e-05	1.9e-05	Novel proteoforms (BRAKER)	1.87292e-05
ACOC_0000164801-mRNA-1	NA	NA	NA	NA	NA	NA	NA	NA	Reference proteoforms (WormBase)	#DIV/0!
ACOC_0000372301-mRNA-1	NA	9.25827e-05	NA	NA	NA	NA	NA	NA	Reference proteoforms (WormBase)	9.25827e-05
MSTRG.5104.5	6.16333e-05	0.00255758	0.00131	0.00131	0.001726	0.001448	0.001494	0.001556	Novel proteoforms (BRAKER)	0.0014329
ACOC_0000235301-mRNA-1	0.000359186	0.000349214	0.000354	0.000354	0.000353	0.000354	0.000353	0.000353	Reference proteins (WormBase)	0.000353675
MSTRG.7484.1	5.85e-06	4.84333e-06	5e-06	5e-06	5e-06	5e-06	5e-06	5e-06	Proteins from merged genes (BRAKER)	5.08667e-06
MSTRG.10467.1	2.142e-06	NA	NA	NA	NA	NA	NA	NA	Proteins from merged genes (BRAKER)	2.142e-06
MSTRG.5763.2	NA	NA	NA	NA	NA	NA	NA	NA	Proteins from merged genes (BRAKER)	#DIV/0!
ACOC_0000014701-mRNA-1	0.000131054	0.000117987	0.000125	0.000125	0.000122	0.000124	0.000124	0.000123	Reference proteins (WormBase)	0.000124005
ACOC_0001229701-mRNA-1	0.000228595	0.000198631	0.000214	0.000214	0.000209	0.000212	0.000211	0.000211	Reference proteins (WormBase)	0.000212278
MSTRG.12659.1	NA	NA	NA	NA	NA	NA	NA	NA	Novel proteins (BRAKER)	#DIV/0!
ACOC_0001187801-mRNA-1	6.16e-05	9.52347e-05	7.8e-05	7.8e-05	8.4e-05	8e-05	8.1e-05	8.2e-05	Reference proteins (WormBase)	7.99793e-05
MSTRG.3228.2	1.47e-05	2.06e-05	1.8e-05	1.8e-05	1.9e-05	1.8e-05	1.8e-05	1.8e-05	Novel proteoforms (BRAKER)	1.80375e-05
MSTRG.264.1	NA	NA	NA	NA	NA	NA	NA	NA	Novel proteoforms (BRAKER)	#DIV/0!
MSTRG.485.1	NA	NA	NA	NA	NA	NA	NA	NA	Novel proteoforms (BRAKER)	#DIV/0!
MSTRG.10566.3	3.68e-05	NA	NA	NA	NA	NA	NA	NA	Novel proteoforms (BRAKER)	3.68e-05
MSTRG.2981.1	8.25667e-06	1.03667e-05	9e-06	9e-06	1e-05	9e-06	9e-06	1e-05	Novel proteins (BRAKER)	9.32792e-06
MSTRG.12808.2	0.000103677	7.91233e-05	9.1e-05	9.1e-05	8.7e-05	9e-05	9e-05	8.9e-05	Novel proteoforms (BRAKER)	9.01e-05
MSTRG.1796.2	2.96333e-05	0.000126648	7.8e-05	7.8e-05	9.4e-05	8.4e-05	8.5e-05	8.8e-05	Novel proteoforms (BRAKER)	8.29102e-05
MSTRG.4149.2	4.93333e-05	1.715e-05	3.3e-05	3.3e-05	2.8e-05	3.1e-05	3.1e-05	3e-05	Novel proteoforms (BRAKER)	3.15604e-05
MSTRG.5615.1	3.91e-05	6.43e-05	5.2e-05	5.2e-05	5.6e-05	5.3e-05	5.4e-05	5.4e-05	Novel proteoforms (BRAKER)	5.305e-05
MSTRG.891.2	NA	9.14e-06	NA	NA	NA	NA	NA	NA	Novel proteoforms (BRAKER)	9.14e-06
MSTRG.11091.1	NA	NA	NA	NA	NA	NA	NA	NA	Proteins from merged genes (BRAKER)	#DIV/0!
MSTRG.4519.1	1.09e-05	1.022e-05	1.1e-05	1.1e-05	1e-05	1.1e-05	1.1e-05	1e-05	Novel proteoforms (BRAKER)	1.064e-05
ACOC_0000672401-mRNA-1	NA	NA	NA	NA	NA	NA	NA	NA	Reference proteins (WormBase)	#DIV/0!
ACOC_0000510001-mRNA-1	0.000170221	0.000154873	0.000163	0.000163	0.00016	0.000162	0.000161	0.000161	Reference proteins (WormBase)	0.000161887
ACOC_0000310701-mRNA-1	NA	NA	NA	NA	NA	NA	NA	NA	Reference proteoforms (WormBase)	#DIV/0!
ACOC_0000453001-mRNA-1	NA	NA	NA	NA	NA	NA	NA	NA	Reference proteins (WormBase)	#DIV/0!
MSTRG.439.1	3.545e-06	NA	NA	NA	NA	NA	NA	NA	Novel proteoforms (BRAKER)	3.545e-06
MSTRG.7626.1	0.000871179	0.000984359	0.000928	0.000928	0.000947	0.000934	0.000936	0.000939	Novel proteoforms (BRAKER)	0.000933442
MSTRG.9115.1	3.18e-06	NA	NA	NA	NA	NA	NA	NA	Novel proteoforms (BRAKER)	3.18e-06
MSTRG.7168.1	5.24667e-05	7.6669e-05	6.5e-05	6.5e-05	6.9e-05	6.6e-05	6.6e-05	6.7e-05	Novel proteoforms (BRAKER)	6.5892e-05
MSTRG.2103.3	3.49e-06	3.29333e-06	3e-06	3e-06	3e-06	3e-06	3e-06	3e-06	Proteins from merged genes (BRAKER)	3.09792e-06
ACOC_0000000601-mRNA-1	1.26667e-05	1.41933e-05	1.3e-05	1.3e-05	1.4e-05	1.4e-05	1.4e-05	1.4e-05	Reference proteins (WormBase)	1.36075e-05
MSTRG.4392.1	1.56e-05	2.63e-05	2.1e-05	2.1e-05	2.3e-05	2.2e-05	2.2e-05	2.2e-05	Novel proteins (BRAKER)	2.16125e-05
ACOC_0000861501-mRNA-1	1.80667e-05	1.69333e-05	1.8e-05	1.8e-05	1.7e-05	1.7e-05	1.7e-05	1.7e-05	Reference proteoforms (WormBase)	1.7375e-05
ACOC_0000324401-mRNA-1	2.035e-05	2.45e-05	2.2e-05	2.2e-05	2.3e-05	2.3e-05	2.3e-05	2.3e-05	Reference proteoforms (WormBase)	2.26062e-05
MSTRG.7444.1	1.103e-05	4.58333e-06	8e-06	8e-06	7e-06	7e-06	7e-06	7e-06	Novel proteoforms (BRAKER)	7.45167e-06
MSTRG.12694.1	1.93e-05	1.98e-05	2e-05	2e-05	2e-05	2e-05	2e-05	2e-05	Novel proteoforms (BRAKER)	1.98875e-05
MSTRG.12420.1	1.78e-05	2.26e-05	2e-05	2e-05	2.1e-05	2e-05	2.1e-05	2.1e-05	Novel proteoforms (BRAKER)	2.0425e-05
MSTRG.1089.1	5.7e-07	7.70333e-06	4e-06	4e-06	5e-06	5e-06	5e-06	5e-06	Novel proteins (BRAKER)	4.53417e-06
MSTRG.11242.1	1.02e-06	4.44e-07	1e-06	1e-06	1e-06	1e-06	1e-06	1e-06	Novel proteoforms (BRAKER)	9.33e-07
MSTRG.7349.2	NA	NA	NA	NA	NA	NA	NA	NA	Proteins from merged genes (BRAKER)	#DIV/0!
MSTRG.12230.1	0.000283814	0.000233553	0.000259	0.000259	0.00025	0.000256	0.000255	0.000254	Novel proteoforms (BRAKER)	0.000256296
MSTRG.654.1	6.76e-06	4.665e-06	6e-06	6e-06	5e-06	6e-06	6e-06	6e-06	Novel proteoforms (BRAKER)	5.80312e-06
MSTRG.8781.1	4.3e-05	NA	NA	NA	NA	NA	NA	NA	Novel proteoforms (BRAKER)	4.3e-05
MSTRG.2497.1	3.58e-05	NA	NA	NA	NA	NA	NA	NA	Novel proteoforms (BRAKER)	3.58e-05
MSTRG.9224.1	NA	1.96e-05	NA	NA	NA	NA	NA	NA	Novel proteins (BRAKER)	1.96e-05
MSTRG.3044.1	5.83e-05	NA	NA	NA	NA	NA	NA	NA	Novel proteoforms (BRAKER)	5.83e-05
MSTRG.9787.1	NA	NA	NA	NA	NA	NA	NA	NA	Novel proteoforms (BRAKER)	#DIV/0!
MSTRG.3707.1	NA	NA	NA	NA	NA	NA	NA	NA	Novel proteoforms (BRAKER)	#DIV/0!
MSTRG.12969.2	NA	NA	NA	NA	NA	NA	NA	NA	Novel proteoforms (BRAKER)	#DIV/0!
MSTRG.1989.1	NA	NA	NA	NA	NA	NA	NA	NA	Novel proteoforms (BRAKER)	#DIV/0!
MSTRG.200.1	NA	9.66e-05	NA	NA	NA	NA	NA	NA	Novel proteoforms (BRAKER)	9.66e-05
MSTRG.11979.1	NA	NA	NA	NA	NA	NA	NA	NA	Novel proteoforms (BRAKER)	#DIV/0!
MSTRG.11029.1	5.69667e-06	3.41667e-06	5e-06	5e-06	4e-06	4e-06	4e-06	4e-06	Novel proteoforms (BRAKER)	4.38917e-06
MSTRG.4943.1	7.32e-06	NA	NA	NA	NA	NA	NA	NA	Novel proteoforms (BRAKER)	7.32e-06
MSTRG.12054.1	NA	NA	NA	NA	NA	NA	NA	NA	Novel proteoforms (BRAKER)	#DIV/0!
MSTRG.4286.1	NA	1.9e-06	NA	NA	NA	NA	NA	NA	Novel proteoforms (BRAKER)	1.9e-06
MSTRG.7263.1	5.73e-05	4.535e-05	5.1e-05	5.1e-05	4.9e-05	5.1e-05	5e-05	5e-05	Novel proteoforms (BRAKER)	5.05813e-05
MSTRG.8803.3	1.08e-05	NA	NA	NA	NA	NA	NA	NA	Novel proteoforms (BRAKER)	1.08e-05
MSTRG.6969.1	NA	NA	NA	NA	NA	NA	NA	NA	Novel proteoforms (BRAKER)	#DIV/0!
MSTRG.6386.1	1.8e-06	1.75e-06	2e-06	2e-06	2e-06	2e-06	2e-06	2e-06	Novel proteoforms (BRAKER)	1.94375e-06
MSTRG.7966.1	2.97e-06	NA	NA	NA	NA	NA	NA	NA	Proteins from merged genes (BRAKER)	2.97e-06
MSTRG.7006.1	9.8e-05	NA	NA	NA	NA	NA	NA	NA	Proteins from merged genes (BRAKER)	9.8e-05
MSTRG.10601.3	NA	1.48e-05	NA	NA	NA	NA	NA	NA	Novel proteoforms (BRAKER)	1.48e-05
MSTRG.10097.1	NA	NA	NA	NA	NA	NA	NA	NA	Novel proteoforms (BRAKER)	#DIV/0!
MSTRG.210.1	NA	5.51e-07	NA	NA	NA	NA	NA	NA	Novel proteins (BRAKER)	5.51e-07
ACOC_0000325001-mRNA-1	4.77e-06	NA	NA	NA	NA	NA	NA	NA	Reference proteins (WormBase)	4.77e-06
MSTRG.311.1	1.4e-06	2.81e-06	2e-06	2e-06	2e-06	2e-06	2e-06	2e-06	Novel proteoforms (BRAKER)	2.02625e-06
MSTRG.11929.1	NA	NA	NA	NA	NA	NA	NA	NA	Proteins from merged genes (BRAKER)	#DIV/0!
MSTRG.8773.1	2.5565e-05	NA	NA	NA	NA	NA	NA	NA	Novel proteoforms (BRAKER)	2.5565e-05
MSTRG.1376.2	NA	NA	NA	NA	NA	NA	NA	NA	Novel proteoforms (BRAKER)	#DIV/0!
MSTRG.8765.1	NA	NA	NA	NA	NA	NA	NA	NA	Novel proteoforms (BRAKER)	#DIV/0!
MSTRG.11118.1	NA	NA	NA	NA	NA	NA	NA	NA	Novel proteoforms (BRAKER)	#DIV/0!
MSTRG.7576.1	2.59e-06	NA	NA	NA	NA	NA	NA	NA	Novel proteoforms (BRAKER)	2.59e-06
MSTRG.4265.1	1.52e-06	8.735e-07	1e-06	1e-06	1e-06	1e-06	1e-06	1e-06	Proteins from merged genes (BRAKER)	1.04919e-06
ACOC_0001029501-mRNA-1	0.000473661	0.000493727	0.000484	0.000484	0.000487	0.000485	0.000485	0.000486	Reference proteins (WormBase)	0.000484799
MSTRG.2874.1	0.00218179	0.00320402	0.002693	0.002693	0.002863	0.00275	0.002769	0.002794	Novel proteoforms (BRAKER)	0.00274348
ACOC_0000912701-mRNA-1	0.000450948	0.000520712	0.000486	0.000486	0.000497	0.00049	0.000491	0.000493	Reference proteins (WormBase)	0.000489333
MSTRG.6663.1	0.000661387	0.000710565	0.000686	0.000686	0.000694	0.000689	0.00069	0.000691	Novel proteoforms (BRAKER)	0.000688494
MSTRG.7254.1	0.00091844	0.000806964	0.000863	0.000863	0.000844	0.000857	0.000854	0.000852	Novel proteoforms (BRAKER)	0.000857301
MSTRG.6268.1	NA	NA	NA	NA	NA	NA	NA	NA	Proteins from merged genes (BRAKER)	#DIV/0!
MSTRG.6338.1	NA	NA	NA	NA	NA	NA	NA	NA	Novel proteoforms (BRAKER)	#DIV/0!
ACOC_0000891401-mRNA-1	0.000929982	0.000870422	0.0009	0.0009	0.00089	0.000897	0.000896	0.000894	Reference proteoforms (WormBase)	0.000897176
ACOC_0001029801-mRNA-1	0.00116581	0.000968712	0.001067	0.001067	0.001034	0.001056	0.001053	0.001048	Reference proteins (WormBase)	0.00105744
MSTRG.10569.1	9.4415e-05	8.9319e-05	9.2e-05	9.2e-05	9.1e-05	9.2e-05	9.1e-05	9.1e-05	Proteins from merged genes (BRAKER)	9.15918e-05
MSTRG.1582.1	0.000272205	0.000157847	0.000215	0.000215	0.000196	0.000209	0.000207	0.000204	Novel proteoforms (BRAKER)	0.000209506
MSTRG.5241.1	2.97667e-05	2.83333e-05	2.9e-05	2.9e-05	2.9e-05	2.9e-05	2.9e-05	2.9e-05	Novel proteoforms (BRAKER)	2.90125e-05
MSTRG.5277.1	0.000361726	0.000336639	0.000349	0.000349	0.000345	0.000348	0.000347	0.000347	Novel proteoforms (BRAKER)	0.000347921
ACOC_0000735401-mRNA-1	0.00169808	0.00156924	0.001634	0.001634	0.001612	0.001627	0.001624	0.001621	Reference proteins (WormBase)	0.00162742
ACOC_0001211901-mRNA-1	0.000772705	0.000379648	0.000576	0.000576	0.000511	0.000554	0.000547	0.000537	Reference proteins (WormBase)	0.000556669
MSTRG.308.1	NA	0.000903153	NA	NA	NA	NA	NA	NA	Novel proteoforms (BRAKER)	0.000903153
MSTRG.8976.1	0.00082921	0.000869208	0.000849	0.000849	0.000856	0.000851	0.000852	0.000853	Novel proteoforms (BRAKER)	0.000851052
MSTRG.4950.1	3.97667e-05	4.02667e-05	4e-05	4e-05	4e-05	4e-05	4e-05	4e-05	Novel proteoforms (BRAKER)	4.00042e-05
MSTRG.9252.1	0.000662613	0.000226429	0.000445	0.000445	0.000372	0.00042	0.000412	0.000401	Novel proteoforms (BRAKER)	0.000423005
ACOC_0000247801-mRNA-1	0.0001594	0.000193465	0.000176	0.000176	0.000182	0.000178	0.000179	0.00018	Proteins from split genes (WormBase)	0.000177983
MSTRG.10973.1	5.78333e-05	3.01333e-05	4.4e-05	4.4e-05	3.9e-05	4.2e-05	4.2e-05	4.1e-05	Proteins from merged genes (BRAKER)	4.24958e-05
MSTRG.10438.1	0.000611688	0.000530257	0.000571	0.000571	0.000557	0.000566	0.000565	0.000563	Novel proteoforms (BRAKER)	0.000566868
MSTRG.5674.1	0.00141634	0.00162673	0.001522	0.001522	0.001557	0.001533	0.001537	0.001542	Novel proteoforms (BRAKER)	0.00153201
ACOC_0000290201-mRNA-1	2.09e-06	NA	NA	NA	NA	NA	NA	NA	Proteins from split genes (WormBase)	2.09e-06
ACOC_0000775901-mRNA-1	0.000327061	0.000317736	0.000322	0.000322	0.000321	0.000322	0.000322	0.000321	Reference proteoforms (WormBase)	0.00032185
MSTRG.7643.1	NA	NA	NA	NA	NA	NA	NA	NA	Novel proteoforms (BRAKER)	#DIV/0!
MSTRG.4687.1	0.000216883	0.000245552	0.000231	0.000231	0.000236	0.000233	0.000233	0.000234	Novel proteoforms (BRAKER)	0.000232554
MSTRG.3308.1	0.000274983	0.000231118	0.000253	0.000253	0.000246	0.000251	0.00025	0.000249	Novel proteoforms (BRAKER)	0.000251013
MSTRG.9355.1	0.00467225	0.00390677	0.00429	0.00429	0.004162	0.004247	0.004233	0.004214	Novel proteoforms (BRAKER)	0.00425188
MSTRG.7491.1	7.55e-05	0.000102741	8.9e-05	8.9e-05	9.4e-05	9.1e-05	9.1e-05	9.2e-05	Novel proteoforms (BRAKER)	9.05301e-05
MSTRG.12038.2	0.000304798	0.000278635	0.000292	0.000292	0.000287	0.00029	0.00029	0.000289	Novel proteoforms (BRAKER)	0.000290429
MSTRG.1563.1	0.000857777	0.0008383	0.000848	0.000848	0.000845	0.000847	0.000847	0.000846	Novel proteoforms (BRAKER)	0.000847135
MSTRG.7421.1	NA	NA	NA	NA	NA	NA	NA	NA	Novel proteoforms (BRAKER)	#DIV/0!
ACOC_0000433101-mRNA-1	0.00145421	0.00146607	0.00146	0.00146	0.001462	0.001461	0.001461	0.001461	Reference proteins (WormBase)	0.00146066
MSTRG.9255.2	0.00025779	0.000291378	0.000275	0.000275	0.00028	0.000276	0.000277	0.000278	Novel proteoforms (BRAKER)	0.000276271
MSTRG.226.1	0.000158588	0.000127516	0.000143	0.000143	0.000138	0.000141	0.000141	0.00014	Novel proteoforms (BRAKER)	0.000141513
ACOC_0001155501-mRNA-1	NA	NA	NA	NA	NA	NA	NA	NA	Reference proteoforms (WormBase)	#DIV/0!
MSTRG.11270.1	6.26e-05	6.41333e-05	6.3e-05	6.3e-05	6.4e-05	6.3e-05	6.3e-05	6.4e-05	Novel proteoforms (BRAKER)	6.33417e-05
MSTRG.5543.1	0.000350346	0.000355383	0.000353	0.000353	0.000354	0.000353	0.000353	0.000353	Novel proteoforms (BRAKER)	0.000353091
MSTRG.10684.1	0.00537931	0.00454764	0.004963	0.004963	0.004825	0.004917	0.004902	0.004881	Novel proteoforms (BRAKER)	0.00492224
MSTRG.5597.1	0.000232083	0.000245775	0.000239	0.000239	0.000241	0.00024	0.00024	0.00024	Novel proteoforms (BRAKER)	0.000239607
MSTRG.7193.1	0.000251455	0.000157072	0.000204	0.000204	0.000189	0.000199	0.000197	0.000195	Novel proteoforms (BRAKER)	0.000199566
MSTRG.8959.1	0.000421918	0.000408772	0.000415	0.000415	0.000413	0.000415	0.000414	0.000414	Novel proteoforms (BRAKER)	0.000414586
MSTRG.6652.1	0.000142017	0.00017837	0.00016	0.00016	0.000166	0.000162	0.000163	0.000164	Novel proteoforms (BRAKER)	0.000161923
MSTRG.6555.1	0.00423203	0.00299883	0.003615	0.003615	0.00341	0.003547	0.003524	0.003494	Novel proteoforms (BRAKER)	0.00355448
MSTRG.8869.1	0.000441963	0.000384207	0.000413	0.000413	0.000403	0.00041	0.000409	0.000407	Novel proteoforms (BRAKER)	0.000410146
MSTRG.5302.1	0.000431338	0.000344869	0.000388	0.000388	0.000374	0.000383	0.000382	0.00038	Novel proteoforms (BRAKER)	0.000383901
MSTRG.7211.1	0.000287291	0.000259585	0.000273	0.000273	0.000269	0.000272	0.000271	0.000271	Novel proteoforms (BRAKER)	0.000271984
MSTRG.2786.1	0.000146593	0.000169467	0.000158	0.000158	0.000162	0.000159	0.00016	0.00016	Proteins from merged genes (BRAKER)	0.000159133
ACOC_0000447001-mRNA-1	0.00195794	0.00198351	0.001971	0.001971	0.001975	0.001972	0.001973	0.001973	Reference proteins (WormBase)	0.00197206
MSTRG.10030.1	1.48667e-05	2.61667e-05	2.1e-05	2.1e-05	2.2e-05	2.1e-05	2.1e-05	2.2e-05	Novel proteoforms (BRAKER)	2.11292e-05
MSTRG.8450.1	0.000106819	0.000117835	0.000112	0.000112	0.000114	0.000113	0.000113	0.000113	Novel proteoforms (BRAKER)	0.000112707
ACOC_0000103401-mRNA-1	0.00298227	0.00191438	0.002448	0.002448	0.00227	0.002389	0.002369	0.002343	Reference proteins (WormBase)	0.00239546
MSTRG.5987.1	0.000199262	0.000269134	0.000234	0.000234	0.000246	0.000238	0.000239	0.000241	Novel proteoforms (BRAKER)	0.000237549
MSTRG.11924.1	NA	NA	NA	NA	NA	NA	NA	NA	Proteins from merged genes (BRAKER)	#DIV/0!
MSTRG.4679.1	2.15e-05	1.75e-05	2e-05	2e-05	1.9e-05	1.9e-05	1.9e-05	1.9e-05	Novel proteoforms (BRAKER)	1.9375e-05
MSTRG.4672.1	4.92333e-06	1.25733e-06	3e-06	3e-06	2e-06	3e-06	3e-06	3e-06	Novel proteoforms (BRAKER)	2.89758e-06
MSTRG.11322.1	NA	NA	NA	NA	NA	NA	NA	NA	Novel proteoforms (BRAKER)	#DIV/0!
ACOC_0000299401-mRNA-1	0.000152436	0.000129389	0.000141	0.000141	0.000137	0.00014	0.000139	0.000139	Reference proteins (WormBase)	0.000139853
MSTRG.3602.1	0.00196295	0.00264256	0.002303	0.002303	0.002416	0.002341	0.002353	0.00237	Novel proteoforms (BRAKER)	0.00233644
MSTRG.10912.2	5.23333e-05	5.96e-05	5.6e-05	5.6e-05	5.7e-05	5.6e-05	5.7e-05	5.7e-05	Novel proteoforms (BRAKER)	5.63667e-05
ACOC_0000455601-mRNA-1	NA	NA	NA	NA	NA	NA	NA	NA	Reference proteoforms (WormBase)	#DIV/0!
MSTRG.4563.2	4.58e-05	3.195e-05	3.9e-05	3.9e-05	3.7e-05	3.8e-05	3.8e-05	3.8e-05	Novel proteoforms (BRAKER)	3.83438e-05
MSTRG.7474.1	2.88333e-05	3.28333e-05	3.1e-05	3.1e-05	3.2e-05	3.1e-05	3.1e-05	3.1e-05	Novel proteoforms (BRAKER)	3.10833e-05
MSTRG.8809.5	0.000138942	6.75663e-05	0.000103	0.000103	9.1e-05	9.9e-05	9.8e-05	9.6e-05	Novel proteoforms (BRAKER)	9.95635e-05
MSTRG.1533.1	8.06333e-05	9.70673e-05	8.9e-05	8.9e-05	9.2e-05	9e-05	9e-05	9e-05	Novel proteoforms (BRAKER)	8.97126e-05
MSTRG.5664.1	7.93e-05	6.15333e-05	7e-05	7e-05	6.7e-05	6.9e-05	6.9e-05	6.9e-05	Novel proteoforms (BRAKER)	6.93542e-05
MSTRG.10931.1	0.00150854	0.0011929	0.001351	0.001351	0.001298	0.001333	0.001327	0.00132	Novel proteoforms (BRAKER)	0.00133518
MSTRG.1565.2	0.000196926	0.000267155	0.000232	0.000232	0.000244	0.000236	0.000237	0.000239	Novel proteoforms (BRAKER)	0.00023551
MSTRG.4443.1	0.000988023	0.00103862	0.001013	0.001013	0.001022	0.001016	0.001017	0.001018	Proteins from merged genes (BRAKER)	0.00101571
MSTRG.10348.1	5.17e-05	3.28e-05	4.2e-05	4.2e-05	3.9e-05	4.1e-05	4.1e-05	4e-05	Novel proteoforms (BRAKER)	4.11875e-05
MSTRG.9073.1	4.99667e-05	5.77667e-05	5.4e-05	5.4e-05	5.5e-05	5.4e-05	5.4e-05	5.5e-05	Proteins from merged genes (BRAKER)	5.42167e-05
ACOC_0000951301-mRNA-1	0.000157873	0.000115453	0.000137	0.000137	0.00013	0.000134	0.000134	0.000132	Reference proteins (WormBase)	0.000134666
MSTRG.8085.1	9.448e-05	8.32e-05	8.9e-05	8.9e-05	8.7e-05	8.8e-05	8.8e-05	8.8e-05	Novel proteoforms (BRAKER)	8.8335e-05
ACOC_0000397501-mRNA-1	7.67e-05	8.01483e-05	7.8e-05	7.8e-05	7.9e-05	7.9e-05	7.9e-05	7.9e-05	Reference proteins (WormBase)	7.8606e-05
MSTRG.1289.1	0.000521935	0.000519275	0.000521	0.000521	0.00052	0.00052	0.00052	0.00052	Novel proteoforms (BRAKER)	0.000520401
MSTRG.1196.3	2.53667e-05	2.27e-05	2.4e-05	2.4e-05	2.4e-05	2.4e-05	2.4e-05	2.4e-05	Novel proteoforms (BRAKER)	2.40083e-05
MSTRG.4025.1	4.74e-05	NA	NA	NA	NA	NA	NA	NA	Novel proteoforms (BRAKER)	4.74e-05
MSTRG.9708.2	1.68633e-05	2.02667e-05	1.9e-05	1.9e-05	1.9e-05	1.9e-05	1.9e-05	1.9e-05	Novel proteoforms (BRAKER)	1.88912e-05
ACOC_0000266301-mRNA-1	0.000572593	0.000585408	0.000579	0.000579	0.000581	0.00058	0.00058	0.00058	Reference proteins (WormBase)	0.000579625
ACOC_0000338601-mRNA-1	0.000259037	0.000307619	0.000283	0.000283	0.000291	0.000286	0.000287	0.000288	Reference proteoforms (WormBase)	0.000285582
MSTRG.4712.2	4.22333e-05	5.61333e-05	4.9e-05	4.9e-05	5.2e-05	5e-05	5e-05	5.1e-05	Novel proteoforms (BRAKER)	4.99208e-05
MSTRG.7044.1	4.39e-05	4.66667e-05	4.5e-05	4.5e-05	4.6e-05	4.5e-05	4.5e-05	4.6e-05	Novel proteoforms (BRAKER)	4.53208e-05
ACOC_0000814701-mRNA-1	0.000257016	0.000211447	0.000234	0.000234	0.000227	0.000232	0.000231	0.00023	Reference proteins (WormBase)	0.000232058
ACOC_0000154101-mRNA-1	0.000991668	0.000815738	0.000904	0.000904	0.000874	0.000894	0.000891	0.000886	Reference proteins (WormBase)	0.000895051
MSTRG.133.1	8.47e-05	0.000116037	0.0001	0.0001	0.000106	0.000102	0.000103	0.000103	Novel proteoforms (BRAKER)	0.000101842
MSTRG.7529.1	0.00014369	0.000127376	0.000136	0.000136	0.000133	0.000135	0.000134	0.000134	Novel proteoforms (BRAKER)	0.000134883
MSTRG.1316.1	NA	NA	NA	NA	NA	NA	NA	NA	Novel proteoforms (BRAKER)	#DIV/0!
MSTRG.9082.1	0.000152572	0.000191217	0.000172	0.000172	0.000178	0.000174	0.000175	0.000176	Novel proteoforms (BRAKER)	0.000173849
MSTRG.6451.1	0.000392561	0.000598845	0.000496	0.000496	0.00053	0.000507	0.000511	0.000516	Novel proteoforms (BRAKER)	0.000505926
MSTRG.10103.1	6.23977e-05	5.60333e-05	5.9e-05	5.9e-05	5.8e-05	5.9e-05	5.9e-05	5.9e-05	Novel proteoforms (BRAKER)	5.89289e-05
MSTRG.9042.1	3.38333e-05	4.59333e-05	4e-05	4e-05	4.2e-05	4.1e-05	4.1e-05	4.1e-05	Novel proteoforms (BRAKER)	4.05958e-05
MSTRG.6356.1	0.000202246	0.000121922	0.000162	0.000162	0.000149	0.000158	0.000156	0.000154	Novel proteoforms (BRAKER)	0.000158146
ACOC_0000532801-mRNA-1	0.000131874	0.000163229	0.000148	0.000148	0.000153	0.000149	0.00015	0.000151	Reference proteins (WormBase)	0.000149263
MSTRG.591.1	0.000150833	0.000132721	0.000142	0.000142	0.000139	0.000141	0.00014	0.00014	Proteins from merged genes (BRAKER)	0.000140944
MSTRG.4494.1	4.87333e-05	4.33667e-05	4.6e-05	4.6e-05	4.5e-05	4.6e-05	4.6e-05	4.6e-05	Novel proteoforms (BRAKER)	4.58875e-05
MSTRG.9609.2	NA	2.48e-05	NA	NA	NA	NA	NA	NA	Novel proteoforms (BRAKER)	2.48e-05
MSTRG.9604.1	1.97667e-05	2.61333e-05	2.3e-05	2.3e-05	2.4e-05	2.3e-05	2.3e-05	2.4e-05	Novel proteoforms (BRAKER)	2.32375e-05
MSTRG.9783.3	0.000640968	0.000455477	0.000548	0.000548	0.000517	0.000538	0.000534	0.00053	Novel proteoforms (BRAKER)	0.000538931
MSTRG.2381.1	4.165e-05	NA	NA	NA	NA	NA	NA	NA	Novel proteoforms (BRAKER)	4.165e-05
MSTRG.6116.1	0.000247007	0.000442929	0.000345	0.000345	0.000378	0.000356	0.000359	0.000364	Novel proteoforms (BRAKER)	0.000354617
MSTRG.2780.1	NA	NA	NA	NA	NA	NA	NA	NA	Novel proteoforms (BRAKER)	#DIV/0!
MSTRG.695.1	2.85e-05	NA	NA	NA	NA	NA	NA	NA	Novel proteoforms (BRAKER)	2.85e-05
MSTRG.7897.1	1.46e-05	1.809e-05	1.6e-05	1.6e-05	1.7e-05	1.7e-05	1.7e-05	1.7e-05	Novel proteoforms (BRAKER)	1.65863e-05
MSTRG.8909.1	0.000103642	9.24333e-05	9.8e-05	9.8e-05	9.6e-05	9.7e-05	9.7e-05	9.7e-05	Novel proteoforms (BRAKER)	9.73844e-05
MSTRG.8127.1	0.00012676	0.000124266	0.000126	0.000126	0.000125	0.000125	0.000125	0.000125	Proteins from merged genes (BRAKER)	0.000125378
MSTRG.6561.1	0.000334313	0.000347284	0.000341	0.000341	0.000343	0.000342	0.000342	0.000342	Novel proteoforms (BRAKER)	0.000341575
MSTRG.7309.1	3.04e-05	2.225e-05	2.6e-05	2.6e-05	2.5e-05	2.6e-05	2.6e-05	2.6e-05	Novel proteoforms (BRAKER)	2.59563e-05
MSTRG.329.1	0.000217121	0.00029019	0.000254	0.000254	0.000266	0.000258	0.000259	0.000261	Novel proteoforms (BRAKER)	0.000257414
MSTRG.4932.1	8.86e-05	5.4e-05	7.1e-05	7.1e-05	6.6e-05	6.9e-05	6.9e-05	6.8e-05	Novel proteoforms (BRAKER)	6.9575e-05
MSTRG.9715.1	5.34e-05	2.72333e-05	4e-05	4e-05	3.6e-05	3.9e-05	3.8e-05	3.8e-05	Proteins from merged genes (BRAKER)	3.89542e-05
ACOC_0001096001-mRNA-1	4.21667e-05	4.85667e-05	4.5e-05	4.5e-05	4.6e-05	4.6e-05	4.6e-05	4.6e-05	Proteins from split genes (WormBase)	4.55917e-05
MSTRG.1017.1	NA	NA	NA	NA	NA	NA	NA	NA	Novel proteoforms (BRAKER)	#DIV/0!
MSTRG.10696.1	0.000230383	0.000160091	0.000195	0.000195	0.000184	0.000191	0.00019	0.000188	Novel proteins (BRAKER)	0.000191684
MSTRG.4880.1	0.000322487	0.00028452	0.000304	0.000304	0.000297	0.000301	0.000301	0.0003	Novel proteoforms (BRAKER)	0.000301751
ACOC_0000026801-mRNA-1	6.56333e-06	8.97e-06	8e-06	8e-06	8e-06	8e-06	8e-06	8e-06	Reference proteins (WormBase)	7.94167e-06
MSTRG.10485.1	0.000101117	6.86e-05	8.5e-05	8.5e-05	7.9e-05	8.3e-05	8.2e-05	8.2e-05	Novel proteoforms (BRAKER)	8.32146e-05
MSTRG.9893.1	3.93e-05	4.55333e-05	4.2e-05	4.2e-05	4.3e-05	4.3e-05	4.3e-05	4.3e-05	Novel proteoforms (BRAKER)	4.26042e-05
MSTRG.1312.1	2.07e-06	1.45367e-06	2e-06	2e-06	2e-06	2e-06	2e-06	2e-06	Novel proteoforms (BRAKER)	1.94046e-06
MSTRG.8758.1	1.46267e-05	1.01867e-05	1.2e-05	1.2e-05	1.2e-05	1.2e-05	1.2e-05	1.2e-05	Novel proteoforms (BRAKER)	1.21017e-05
ACOC_0001075201-mRNA-1	5.70667e-05	5.045e-05	5.4e-05	5.4e-05	5.3e-05	5.3e-05	5.3e-05	5.3e-05	Reference proteins (WormBase)	5.34396e-05
MSTRG.9263.1	6.91e-05	4.3e-05	5.6e-05	5.6e-05	5.2e-05	5.5e-05	5.4e-05	5.3e-05	Novel proteoforms (BRAKER)	5.47625e-05
MSTRG.8133.1	3.21667e-05	2.047e-05	2.6e-05	2.6e-05	2.4e-05	2.6e-05	2.5e-05	2.5e-05	Novel proteoforms (BRAKER)	2.55796e-05
MSTRG.11140.1	0.000320129	0.000783142	0.000552	0.000552	0.000629	0.000577	0.000586	0.000597	Novel proteoforms (BRAKER)	0.000574534
MSTRG.9824.1	2.36e-05	1.24e-05	1.8e-05	1.8e-05	1.6e-05	1.7e-05	1.7e-05	1.7e-05	Proteins from merged genes (BRAKER)	1.7375e-05
ACOC_0001238501-mRNA-1	8.84e-05	NA	NA	NA	NA	NA	NA	NA	Reference proteins (WormBase)	8.84e-05
MSTRG.6272.1	0.00017563	NA	NA	NA	NA	NA	NA	NA	Novel proteoforms (BRAKER)	0.00017563
MSTRG.7091.1	NA	4.68e-05	NA	NA	NA	NA	NA	NA	Novel proteoforms (BRAKER)	4.68e-05
MSTRG.2629.1	1.16567e-05	1.25e-05	1.2e-05	1.2e-05	1.2e-05	1.2e-05	1.2e-05	1.2e-05	Novel proteoforms (BRAKER)	1.20196e-05
MSTRG.6290.1	4.855e-05	3.57333e-05	4.2e-05	4.2e-05	4e-05	4.1e-05	4.1e-05	4.1e-05	Novel proteoforms (BRAKER)	4.14104e-05
MSTRG.10488.1	NA	1.83e-05	NA	NA	NA	NA	NA	NA	Novel proteoforms (BRAKER)	1.83e-05
MSTRG.6189.1	7.32e-05	NA	NA	NA	NA	NA	NA	NA	Novel proteoforms (BRAKER)	7.32e-05
MSTRG.11933.1	1.49e-05	0.000111719	6.3e-05	6.3e-05	7.9e-05	6.9e-05	7e-05	7.3e-05	Novel proteins (BRAKER)	6.79524e-05
MSTRG.4616.4	NA	NA	NA	NA	NA	NA	NA	NA	Novel proteoforms (BRAKER)	#DIV/0!
MSTRG.9081.1	2.55e-05	3.74667e-05	3.1e-05	3.1e-05	3.3e-05	3.2e-05	3.2e-05	3.3e-05	Novel proteoforms (BRAKER)	3.18708e-05
MSTRG.4858.1	NA	NA	NA	NA	NA	NA	NA	NA	Novel proteoforms (BRAKER)	#DIV/0!
MSTRG.1260.1	2.56333e-05	1.865e-05	2.2e-05	2.2e-05	2.1e-05	2.2e-05	2.2e-05	2.1e-05	Novel proteoforms (BRAKER)	2.17854e-05
MSTRG.482.1	4.63333e-06	1.87e-06	3e-06	3e-06	3e-06	3e-06	3e-06	3e-06	Novel proteoforms (BRAKER)	3.06292e-06
MSTRG.7171.1	6.04333e-05	5.22e-05	5.6e-05	5.6e-05	5.5e-05	5.6e-05	5.6e-05	5.6e-05	Novel proteoforms (BRAKER)	5.59542e-05
MSTRG.8016.1	0.00140487	0.00169089	0.001548	0.001548	0.001596	0.001564	0.001569	0.001576	Novel proteoforms (BRAKER)	0.0015621
MSTRG.112.1	NA	NA	NA	NA	NA	NA	NA	NA	Novel proteoforms (BRAKER)	#DIV/0!
ACOC_0000370001-mRNA-1	4.38e-06	4.47333e-06	4e-06	4e-06	4e-06	4e-06	4e-06	4e-06	Reference proteoforms (WormBase)	4.10667e-06
MSTRG.7599.1	8.635e-05	6.57e-05	7.6e-05	7.6e-05	7.3e-05	7.5e-05	7.4e-05	7.4e-05	Novel proteoforms (BRAKER)	7.50062e-05
MSTRG.8140.1	4.98e-06	3.31333e-05	1.9e-05	1.9e-05	2.4e-05	2.1e-05	2.1e-05	2.2e-05	Novel proteins (BRAKER)	2.05142e-05
MSTRG.9984.1	2.44e-05	NA	NA	NA	NA	NA	NA	NA	Novel proteoforms (BRAKER)	2.44e-05
MSTRG.4988.1	3.23e-06	1.115e-05	7e-06	7e-06	9e-06	8e-06	8e-06	8e-06	Novel proteins (BRAKER)	7.6725e-06
ACOC_0000387301-mRNA-1	NA	9.05667e-06	NA	NA	NA	NA	NA	NA	Reference proteoforms (WormBase)	9.05667e-06
MSTRG.682.1	NA	NA	NA	NA	NA	NA	NA	NA	Proteins from merged genes (BRAKER)	#DIV/0!
MSTRG.7315.1	4.19e-06	NA	NA	NA	NA	NA	NA	NA	Novel proteoforms (BRAKER)	4.19e-06
ACOC_0001127001-mRNA-1	0.000143416	0.000132972	0.000138	0.000138	0.000136	0.000138	0.000137	0.000137	Proteins from split genes (WormBase)	0.000137549
MSTRG.9233.1	NA	NA	NA	NA	NA	NA	NA	NA	Novel proteoforms (BRAKER)	#DIV/0!
MSTRG.2281.2	NA	6.21e-07	NA	NA	NA	NA	NA	NA	Novel proteoforms (BRAKER)	6.21e-07
MSTRG.3896.1	7.115e-05	NA	NA	NA	NA	NA	NA	NA	Novel proteoforms (BRAKER)	7.115e-05
MSTRG.2787.4	3.46e-06	2.67e-06	3e-06	3e-06	3e-06	3e-06	3e-06	3e-06	Novel proteoforms (BRAKER)	3.01625e-06
MSTRG.6328.1	3.41e-05	NA	NA	NA	NA	NA	NA	NA	Novel proteoforms (BRAKER)	3.41e-05
MSTRG.12232.1	NA	0.000293342	NA	NA	NA	NA	NA	NA	Novel proteoforms (BRAKER)	0.000293342
ACOC_0000771101-mRNA-1	NA	NA	NA	NA	NA	NA	NA	NA	Reference proteins (WormBase)	#DIV/0!
ACOC_0000755701-mRNA-1	0.00011927	7.99e-05	0.0001	0.0001	9.3e-05	9.7e-05	9.7e-05	9.6e-05	Proteins from split genes (WormBase)	9.77713e-05
MSTRG.11135.1	2e-06	1.06e-06	2e-06	2e-06	1e-06	1e-06	1e-06	1e-06	Proteins from merged genes (BRAKER)	1.3825e-06
MSTRG.12156.1	NA	7.35e-06	NA	NA	NA	NA	NA	NA	Novel proteins (BRAKER)	7.35e-06
MSTRG.6705.1	NA	8.17667e-06	NA	NA	NA	NA	NA	NA	Novel proteoforms (BRAKER)	8.17667e-06
MSTRG.12158.1	NA	NA	NA	NA	NA	NA	NA	NA	Novel proteoforms (BRAKER)	#DIV/0!
ACOC_0000752401-mRNA-1	NA	2.62333e-05	NA	NA	NA	NA	NA	NA	Reference proteins (WormBase)	2.62333e-05
ACOC_0001191801-mRNA-1	1.92533e-05	4.63e-05	3.3e-05	3.3e-05	3.7e-05	3.4e-05	3.5e-05	3.5e-05	Reference proteoforms (WormBase)	3.40692e-05
MSTRG.7858.1	8.46e-06	9.17e-06	9e-06	9e-06	9e-06	9e-06	9e-06	9e-06	Proteins from merged genes (BRAKER)	8.95375e-06
MSTRG.1763.1	1.23e-06	NA	NA	NA	NA	NA	NA	NA	Novel proteoforms (BRAKER)	1.23e-06
MSTRG.7140.1	NA	NA	NA	NA	NA	NA	NA	NA	Novel proteoforms (BRAKER)	#DIV/0!
MSTRG.11611.1	0.00024653	0.000248142	0.000247	0.000247	0.000248	0.000247	0.000247	0.000247	Proteins from merged genes (BRAKER)	0.000247209
MSTRG.7152.1	1.262e-06	1.48e-06	1e-06	1e-06	1e-06	1e-06	1e-06	1e-06	Proteins from merged genes (BRAKER)	1.09275e-06
MSTRG.4496.1	5.47e-06	1.69e-05	1.1e-05	1.1e-05	1.3e-05	1.2e-05	1.2e-05	1.2e-05	Novel proteoforms (BRAKER)	1.16712e-05
MSTRG.4661.1	1.43e-05	1.28333e-05	1.4e-05	1.4e-05	1.3e-05	1.3e-05	1.3e-05	1.3e-05	Novel proteoforms (BRAKER)	1.33917e-05
MSTRG.9970.1	NA	NA	NA	NA	NA	NA	NA	NA	Novel proteoforms (BRAKER)	#DIV/0!
MSTRG.4298.1	NA	NA	NA	NA	NA	NA	NA	NA	Novel proteins (BRAKER)	#DIV/0!
MSTRG.432.1	7.88e-06	7.16333e-06	8e-06	8e-06	7e-06	7e-06	7e-06	7e-06	Novel proteoforms (BRAKER)	7.38042e-06
MSTRG.2163.1	3.87e-06	NA	NA	NA	NA	NA	NA	NA	Novel proteoforms (BRAKER)	3.87e-06
MSTRG.9185.1	NA	2.52e-06	NA	NA	NA	NA	NA	NA	Novel proteoforms (BRAKER)	2.52e-06
ACOC_0000861801-mRNA-1	NA	NA	NA	NA	NA	NA	NA	NA	Reference proteoforms (WormBase)	#DIV/0!
MSTRG.8459.1	NA	NA	NA	NA	NA	NA	NA	NA	Novel proteoforms (BRAKER)	#DIV/0!
MSTRG.7847.1	NA	NA	NA	NA	NA	NA	NA	NA	Novel proteoforms (BRAKER)	#DIV/0!
MSTRG.5004.1	7.55e-05	6.34e-05	6.9e-05	6.9e-05	6.7e-05	6.9e-05	6.9e-05	6.8e-05	Novel proteoforms (BRAKER)	6.87375e-05
MSTRG.1602.1	NA	NA	NA	NA	NA	NA	NA	NA	Novel proteoforms (BRAKER)	#DIV/0!
ACOC_0000098101-mRNA-1	NA	1.84e-05	NA	NA	NA	NA	NA	NA	Reference proteins (WormBase)	1.84e-05
ACOC_0001289901-mRNA-1	3.94e-06	NA	NA	NA	NA	NA	NA	NA	Reference proteins (WormBase)	3.94e-06
MSTRG.5081.1	NA	NA	NA	NA	NA	NA	NA	NA	Novel proteoforms (BRAKER)	#DIV/0!
MSTRG.10600.1	NA	9.51e-06	NA	NA	NA	NA	NA	NA	Novel proteoforms (BRAKER)	9.51e-06
MSTRG.5173.1	NA	NA	NA	NA	NA	NA	NA	NA	Proteins from merged genes (BRAKER)	#DIV/0!
MSTRG.6180.1	NA	NA	NA	NA	NA	NA	NA	NA	Novel proteins (BRAKER)	#DIV/0!
ACOC_0000394701-mRNA-1	0.00216516	0.00127706	0.001721	0.001721	0.001573	0.001672	0.001655	0.001633	Reference proteoforms (WormBase)	0.00167715
MSTRG.189.1	5.32667e-05	6.52e-05	5.9e-05	5.9e-05	6.1e-05	6e-05	6e-05	6e-05	Novel proteoforms (BRAKER)	5.96833e-05
ACOC_0000078701-mRNA-1	0.00521483	0.00452961	0.004872	0.004872	0.004758	0.004834	0.004821	0.004805	Reference proteins (WormBase)	0.00483831
ACOC_0000296301-mRNA-1	6.76667e-06	3.48333e-06	5e-06	5e-06	5e-06	5e-06	5e-06	5e-06	Reference proteoforms (WormBase)	5.03125e-06
MSTRG.4498.1	0.00137186	0.00112389	0.001248	0.001248	0.001207	0.001234	0.00123	0.001223	Novel proteoforms (BRAKER)	0.00123572
MSTRG.8922.1	1.90833e-05	1.40667e-05	1.7e-05	1.7e-05	1.6e-05	1.6e-05	1.6e-05	1.6e-05	Proteins from merged genes (BRAKER)	1.63937e-05
MSTRG.8906.2	NA	0.000521867	NA	NA	NA	NA	NA	NA	Novel proteoforms (BRAKER)	0.000521867
MSTRG.11065.1	3.97e-05	4.88e-05	4.4e-05	4.4e-05	4.6e-05	4.5e-05	4.5e-05	4.5e-05	Novel proteoforms (BRAKER)	4.46875e-05
ACOC_0001219001-mRNA-1	0.000113945	0.000100039	0.000107	0.000107	0.000105	0.000106	0.000106	0.000106	Proteins from split genes (WormBase)	0.000106373
ACOC_0001050801-mRNA-1	0.000257389	0.000229269	0.000243	0.000243	0.000239	0.000242	0.000241	0.000241	Reference proteins (WormBase)	0.000241957
MSTRG.5784.1	0.00016427	0.000159068	0.000162	0.000162	0.000161	0.000161	0.000161	0.000161	Novel proteoforms (BRAKER)	0.000161417
ACOC_0001040601-mRNA-1	0.000670599	0.000745034	0.000708	0.000708	0.00072	0.000712	0.000713	0.000715	Reference proteoforms (WormBase)	0.000711454
MSTRG.7408.1	0.000207648	0.000173124	0.00019	0.00019	0.000185	0.000188	0.000188	0.000187	Novel proteoforms (BRAKER)	0.000188597
MSTRG.7329.1	0.000263591	0.000736282	0.0005	0.0005	0.000579	0.000526	0.000535	0.000547	Novel proteoforms (BRAKER)	0.000523359
ACOC_0000600001-mRNA-1	4.59333e-05	2.25e-05	3.4e-05	3.4e-05	3e-05	3.3e-05	3.2e-05	3.2e-05	Reference proteins (WormBase)	3.29292e-05
ACOC_0001202501-mRNA-1	0.00431056	0.00475715	0.004534	0.004534	0.004608	0.004559	0.004567	0.004578	Reference proteins (WormBase)	0.00455596
MSTRG.5712.1	0.000207639	0.000191391	0.0002	0.0002	0.000197	0.000199	0.000198	0.000198	Novel proteoforms (BRAKER)	0.000198879
ACOC_0000853301-mRNA-1	0.000106894	0.00013684	0.000122	0.000122	0.000127	0.000124	0.000124	0.000125	Reference proteoforms (WormBase)	0.000123467
MSTRG.10773.1	0.000144124	0.000125152	0.000135	0.000135	0.000131	0.000134	0.000133	0.000133	Novel proteoforms (BRAKER)	0.000133785
ACOC_0000107901-mRNA-1	0.00253853	0.00280416	0.002671	0.002671	0.002716	0.002686	0.002691	0.002698	Reference proteins (WormBase)	0.00268446
MSTRG.12176.1	0.000118786	0.000129492	0.000124	0.000124	0.000126	0.000125	0.000125	0.000125	Novel proteoforms (BRAKER)	0.00012466
ACOC_0000765301-mRNA-1	0.000215379	0.000246382	0.000231	0.000231	0.000236	0.000233	0.000233	0.000234	Reference proteins (WormBase)	0.00023247
MSTRG.5553.1	1.28333e-05	1.51333e-05	1.4e-05	1.4e-05	1.4e-05	1.4e-05	1.4e-05	1.4e-05	Novel proteoforms (BRAKER)	1.39958e-05
MSTRG.4192.1	0.000942087	0.000853557	0.000898	0.000898	0.000883	0.000893	0.000891	0.000889	Novel proteoforms (BRAKER)	0.000893455
ACOC_0000270101-mRNA-1	0.00290179	0.00118949	0.002046	0.002046	0.00176	0.001951	0.001919	0.001877	Reference proteins (WormBase)	0.00196129
ACOC_0000853501-mRNA-1	0.00180634	0.00180163	0.001804	0.001804	0.001803	0.001804	0.001804	0.001804	Reference proteins (WormBase)	0.00180387
MSTRG.10403.1	0.00196065	0.00156681	0.001764	0.001764	0.001698	0.001742	0.001735	0.001725	Novel proteoforms (BRAKER)	0.00174443
MSTRG.4645.1	0.000304792	0.000216727	0.000261	0.000261	0.000246	0.000256	0.000254	0.000252	Proteins from merged genes (BRAKER)	0.00025644
MSTRG.6933.1	0.000698912	0.000617104	0.000658	0.000658	0.000644	0.000653	0.000652	0.00065	Novel proteoforms (BRAKER)	0.000653877
MSTRG.11872.1	0.000416312	0.000374502	0.000395	0.000395	0.000388	0.000393	0.000392	0.000391	Novel proteoforms (BRAKER)	0.000393102
MSTRG.11324.1	0.00301752	0.00292993	0.002974	0.002974	0.002959	0.002969	0.002967	0.002965	Novel proteoforms (BRAKER)	0.00296943
MSTRG.6266.1	0.000366429	0.000372036	0.000369	0.000369	0.00037	0.00037	0.00037	0.00037	Novel proteoforms (BRAKER)	0.000369558
ACOC_0000176401-mRNA-1	0.00266527	0.00269257	0.002679	0.002679	0.002683	0.00268	0.002681	0.002682	Reference proteins (WormBase)	0.00268023
MSTRG.8351.2	0.00169343	0.00230013	0.001997	0.001997	0.002098	0.00203	0.002042	0.002057	Novel proteoforms (BRAKER)	0.00202682
ACOC_0000071101-mRNA-1	9.9771e-05	0.000101715	0.000101	0.000101	0.000101	0.000101	0.000101	0.000101	Reference proteins (WormBase)	0.000100936
ACOC_0000877401-mRNA-1	0.000271916	0.000225491	0.000249	0.000249	0.000241	0.000246	0.000245	0.000244	Reference proteins (WormBase)	0.000246426
MSTRG.4849.1	0.000126529	0.000191737	0.000159	0.000159	0.00017	0.000163	0.000164	0.000166	Novel proteoforms (BRAKER)	0.000162408
MSTRG.1584.1	0.000641772	0.00068346	0.000663	0.000663	0.00067	0.000665	0.000666	0.000667	Proteins from merged genes (BRAKER)	0.000664904
MSTRG.7755.1	0.00030302	0.000355913	0.000329	0.000329	0.000338	0.000332	0.000333	0.000335	Proteins from merged genes (BRAKER)	0.000331867
MSTRG.5099.2	0.0010647	0.000902646	0.000984	0.000984	0.000957	0.000975	0.000972	0.000968	Proteins from merged genes (BRAKER)	0.000975919
MSTRG.4581.1	5.06333e-05	0.000103736	7.7e-05	7.7e-05	8.6e-05	8e-05	8.1e-05	8.2e-05	Novel proteoforms (BRAKER)	7.96712e-05
ACOC_0000457401-mRNA-1	NA	NA	NA	NA	NA	NA	NA	NA	Reference proteoforms (WormBase)	#DIV/0!
MSTRG.10872.1	0.000228971	0.000166228	0.000198	0.000198	0.000187	0.000194	0.000193	0.000191	Novel proteoforms (BRAKER)	0.000194525
ACOC_0000211201-mRNA-1	0.000361827	4.7e-05	0.000204	0.000204	0.000152	0.000187	0.000181	0.000173	Reference proteins (WormBase)	0.000188728
MSTRG.11036.1	0.000213363	0.000202399	0.000208	0.000208	0.000206	0.000207	0.000207	0.000207	Novel proteoforms (BRAKER)	0.000207345
MSTRG.10501.1	0.000143555	0.000128884	0.000136	0.000136	0.000134	0.000135	0.000135	0.000135	Novel proteoforms (BRAKER)	0.00013543
ACOC_0000013401-mRNA-1	0.000151508	0.000162478	0.000157	0.000157	0.000159	0.000158	0.000158	0.000158	Reference proteoforms (WormBase)	0.000157623
MSTRG.116.2	0.00012557	0.000176032	0.000151	0.000151	0.000159	0.000154	0.000155	0.000156	Novel proteoforms (BRAKER)	0.00015345
MSTRG.116.1	NA	NA	NA	NA	NA	NA	NA	NA	Novel proteoforms (BRAKER)	#DIV/0!
MSTRG.11079.1	3.18e-05	2.98e-05	3.1e-05	3.1e-05	3e-05	3.1e-05	3.1e-05	3.1e-05	Novel proteoforms (BRAKER)	3.0825e-05
MSTRG.1555.1	0.00115135	0.000741445	0.000946	0.000946	0.000878	0.000924	0.000916	0.000906	Novel proteoforms (BRAKER)	0.0009261
MSTRG.11892.1	0.000376508	0.000296593	0.000337	0.000337	0.000323	0.000332	0.000331	0.000329	Novel proteoforms (BRAKER)	0.000332763
MSTRG.330.1	0.000371589	0.000304168	0.000338	0.000338	0.000327	0.000334	0.000333	0.000331	Novel proteoforms (BRAKER)	0.000334595
ACOC_0000176501-mRNA-1	0.00269301	0.00251366	0.002603	0.002603	0.002573	0.002593	0.00259	0.002586	Reference proteins (WormBase)	0.00259433
MSTRG.3440.1	0.000252889	0.000183949	0.000218	0.000218	0.000207	0.000215	0.000213	0.000212	Novel proteoforms (BRAKER)	0.00021498
MSTRG.1843.1	8.76e-05	6.31e-05	7.5e-05	7.5e-05	7.1e-05	7.4e-05	7.4e-05	7.3e-05	Novel proteoforms (BRAKER)	7.40875e-05
MSTRG.6696.1	2.59333e-05	1.82e-05	2.2e-05	2.2e-05	2.1e-05	2.2e-05	2.1e-05	2.1e-05	Novel proteoforms (BRAKER)	2.16417e-05
MSTRG.9497.1	4.93e-06	2.62333e-06	4e-06	4e-06	3e-06	4e-06	4e-06	4e-06	Proteins from merged genes (BRAKER)	3.81917e-06
MSTRG.10937.1	0.000119395	0.00010394	0.000112	0.000112	0.000109	0.000111	0.000111	0.00011	Novel proteoforms (BRAKER)	0.000111042
MSTRG.9548.5	0.000300527	0.000229478	0.000265	0.000265	0.000253	0.000261	0.00026	0.000258	Proteins from merged genes (BRAKER)	0.000261501
ACOC_0000950401-mRNA-1	0.00026016	0.000326416	0.000293	0.000293	0.000304	0.000297	0.000298	0.0003	Reference proteins (WormBase)	0.000296447
MSTRG.7884.1	0.00015387	0.00014695	0.00015	0.00015	0.000149	0.00015	0.00015	0.00015	Novel proteoforms (BRAKER)	0.000149977
MSTRG.12301.1	9.5921e-05	5.97667e-05	7.8e-05	7.8e-05	7.2e-05	7.6e-05	7.5e-05	7.4e-05	Novel proteoforms (BRAKER)	7.6086e-05
MSTRG.5216.1	3.90333e-05	6.50237e-05	5.2e-05	5.2e-05	5.6e-05	5.3e-05	5.4e-05	5.5e-05	Novel proteoforms (BRAKER)	5.32571e-05
MSTRG.5203.1	2.04333e-05	4.41333e-05	3.2e-05	3.2e-05	3.6e-05	3.4e-05	3.4e-05	3.5e-05	Novel proteoforms (BRAKER)	3.34458e-05
MSTRG.924.1	2.31667e-05	2.96e-05	2.6e-05	2.6e-05	2.7e-05	2.7e-05	2.7e-05	2.7e-05	Novel proteoforms (BRAKER)	2.65958e-05
MSTRG.9568.1	5.48667e-05	5.08667e-05	5.3e-05	5.3e-05	5.2e-05	5.3e-05	5.3e-05	5.2e-05	Novel proteoforms (BRAKER)	5.27167e-05
ACOC_0000024701-mRNA-1	0.00016979	0.000136169	0.000153	0.000153	0.000147	0.000151	0.00015	0.00015	Reference proteoforms (WormBase)	0.000151245
ACOC_0001236301-mRNA-1	7.05e-05	4.55667e-05	5.8e-05	5.8e-05	5.4e-05	5.7e-05	5.6e-05	5.6e-05	Reference proteoforms (WormBase)	5.68833e-05
MSTRG.9095.1	0.000117706	0.000134622	0.000126	0.000126	0.000129	0.000127	0.000127	0.000128	Novel proteoforms (BRAKER)	0.000126916
ACOC_0000704901-mRNA-1	0.00017554	0.000142064	0.000159	0.000159	0.000153	0.000157	0.000156	0.000155	Reference proteoforms (WormBase)	0.000157075
ACOC_0000202001-mRNA-1	0.000108362	0.000129158	0.000119	0.000119	0.000122	0.00012	0.00012	0.000121	Reference proteins (WormBase)	0.000119815
ACOC_0001166901-mRNA-1	0.00136485	0.000996392	0.001181	0.001181	0.001119	0.00116	0.001153	0.001144	Reference proteins (WormBase)	0.00116241
ACOC_0000593201-mRNA-1	5.39943e-05	3.91667e-05	4.7e-05	4.7e-05	4.4e-05	4.6e-05	4.5e-05	4.5e-05	Proteins from split genes (WormBase)	4.58951e-05
MSTRG.10631.2	0.00115957	0.00114583	0.001153	0.001153	0.00115	0.001152	0.001152	0.001151	Novel proteoforms (BRAKER)	0.00115205
MSTRG.11163.1	NA	2.73e-05	NA	NA	NA	NA	NA	NA	Proteins from merged genes (BRAKER)	2.73e-05
MSTRG.11712.2	4.65333e-05	5.11e-05	4.9e-05	4.9e-05	5e-05	4.9e-05	4.9e-05	4.9e-05	Novel proteoforms (BRAKER)	4.90792e-05
ACOC_0001020801-mRNA-1	0.000251434	0.000157725	0.000205	0.000205	0.000189	0.000199	0.000198	0.000195	Reference proteins (WormBase)	0.00020002
ACOC_0001251601-mRNA-1	0.00190092	0.00166114	0.001781	0.001781	0.001741	0.001768	0.001763	0.001757	Reference proteins (WormBase)	0.00176913
MSTRG.3085.1	2.36867e-05	2.58e-05	2.5e-05	2.5e-05	2.5e-05	2.5e-05	2.5e-05	2.5e-05	Novel proteoforms (BRAKER)	2.49358e-05
MSTRG.6363.1	0.000619815	0.00119331	0.000907	0.000907	0.001002	0.000938	0.000949	0.000963	Novel proteoforms (BRAKER)	0.00093489
MSTRG.7908.1	7.62667e-06	7.8e-06	8e-06	8e-06	8e-06	8e-06	8e-06	8e-06	Proteins from merged genes (BRAKER)	7.92833e-06
MSTRG.4458.3	5.615e-06	4.04e-07	3e-06	3e-06	2e-06	3e-06	3e-06	2e-06	Proteins from merged genes (BRAKER)	2.75238e-06
ACOC_0000444201-mRNA-1	NA	1.46e-06	NA	NA	NA	NA	NA	NA	Proteins from split genes (WormBase)	1.46e-06
MSTRG.12596.2	8.90333e-06	9.15333e-06	9e-06	9e-06	9e-06	9e-06	9e-06	9e-06	Novel proteoforms (BRAKER)	9.00708e-06
MSTRG.11272.1	9.14813e-05	0.00016376	0.000128	0.000128	0.00014	0.000132	0.000133	0.000135	Novel proteoforms (BRAKER)	0.000131405
MSTRG.5979.1	9.49667e-06	5.15e-06	7e-06	7e-06	7e-06	7e-06	7e-06	7e-06	Novel proteins (BRAKER)	7.08083e-06
ACOC_0000117501-mRNA-1	6.31667e-05	7.8452e-05	7.1e-05	7.1e-05	7.3e-05	7.2e-05	7.2e-05	7.2e-05	Reference proteins (WormBase)	7.15773e-05
MSTRG.8094.1	7.89667e-07	6.105e-07	1e-06	1e-06	1e-06	1e-06	1e-06	1e-06	Novel proteoforms (BRAKER)	9.25021e-07
MSTRG.7153.1	1.63e-05	NA	NA	NA	NA	NA	NA	NA	Novel proteoforms (BRAKER)	1.63e-05
ACOC_0001264701-mRNA-1	8.21333e-06	7.11e-06	8e-06	8e-06	7e-06	8e-06	8e-06	8e-06	Reference proteins (WormBase)	7.79042e-06
MSTRG.11019.1	NA	NA	NA	NA	NA	NA	NA	NA	Proteins from merged genes (BRAKER)	#DIV/0!
MSTRG.4423.1	NA	NA	NA	NA	NA	NA	NA	NA	Novel proteoforms (BRAKER)	#DIV/0!
MSTRG.346.4	NA	NA	NA	NA	NA	NA	NA	NA	Proteins from merged genes (BRAKER)	#DIV/0!
MSTRG.2977.1	1.51e-05	1.46e-05	1.5e-05	1.5e-05	1.5e-05	1.5e-05	1.5e-05	1.5e-05	Proteins from merged genes (BRAKER)	1.49625e-05
MSTRG.7453.1	NA	NA	NA	NA	NA	NA	NA	NA	Novel proteins (BRAKER)	#DIV/0!
MSTRG.5118.1	4.495e-05	2.47e-05	3.5e-05	3.5e-05	3.1e-05	3.4e-05	3.3e-05	3.3e-05	Novel proteoforms (BRAKER)	3.38312e-05
ACOC_0001215301-mRNA-1	0.000129914	0.000102326	0.000116	0.000116	0.000112	0.000115	0.000114	0.000113	Reference proteins (WormBase)	0.00011478
MSTRG.2651.1	1.09467e-05	1.58333e-05	1.3e-05	1.3e-05	1.4e-05	1.4e-05	1.4e-05	1.4e-05	Novel proteoforms (BRAKER)	1.35975e-05
MSTRG.10292.1	7.96e-06	7.55e-06	8e-06	8e-06	8e-06	8e-06	8e-06	8e-06	Novel proteoforms (BRAKER)	7.93875e-06
MSTRG.2959.1	1.64433e-05	4.9101e-05	3.3e-05	3.3e-05	3.8e-05	3.5e-05	3.5e-05	3.6e-05	Novel proteoforms (BRAKER)	3.4443e-05
MSTRG.10647.1	1.16267e-05	1.33433e-05	1.2e-05	1.2e-05	1.3e-05	1.3e-05	1.3e-05	1.3e-05	Novel proteoforms (BRAKER)	1.26213e-05
ACOC_0000334601-mRNA-1	0.000335553	0.000233539	0.000285	0.000285	0.000268	0.000279	0.000277	0.000274	Reference proteins (WormBase)	0.000279636
MSTRG.8541.1	9.135e-07	2.1505e-06	2e-06	2e-06	2e-06	2e-06	2e-06	2e-06	Novel proteins (BRAKER)	1.883e-06
MSTRG.1723.1	4.74e-06	3.68667e-06	4e-06	4e-06	4e-06	4e-06	4e-06	4e-06	Novel proteoforms (BRAKER)	4.05333e-06
MSTRG.6263.1	3.95333e-06	1.545e-06	3e-06	3e-06	2e-06	3e-06	3e-06	3e-06	Novel proteoforms (BRAKER)	2.81229e-06
MSTRG.3740.1	3.915e-05	4.175e-05	4e-05	4e-05	4.1e-05	4.1e-05	4.1e-05	4.1e-05	Novel proteoforms (BRAKER)	4.06125e-05
ACOC_0000255201-mRNA-1	NA	NA	NA	NA	NA	NA	NA	NA	Proteins from split genes (WormBase)	#DIV/0!
MSTRG.8103.1	1.14e-06	2.27e-06	2e-06	2e-06	2e-06	2e-06	2e-06	2e-06	Novel proteoforms (BRAKER)	1.92625e-06
ACOC_0000655101-mRNA-1	6.68e-05	4.565e-05	5.6e-05	5.6e-05	5.3e-05	5.5e-05	5.5e-05	5.4e-05	Proteins from split genes (WormBase)	5.51812e-05
MSTRG.6466.3	7.47e-05	5.31e-05	6.4e-05	6.4e-05	6e-05	6.3e-05	6.2e-05	6.2e-05	Proteins from merged genes (BRAKER)	6.285e-05
ACOC_0000818701-mRNA-1	0.000805811	0.000789049	0.000797	0.000797	0.000795	0.000796	0.000796	0.000796	Reference proteins (WormBase)	0.000796482
MSTRG.5475.1	1.74e-05	1.78e-05	1.8e-05	1.8e-05	1.8e-05	1.8e-05	1.8e-05	1.8e-05	Novel proteoforms (BRAKER)	1.79e-05
ACOC_0001054501-mRNA-1	NA	NA	NA	NA	NA	NA	NA	NA	Reference proteins (WormBase)	#DIV/0!
MSTRG.3871.1	0.00011877	0.000135485	0.000127	0.000127	0.00013	0.000128	0.000128	0.000129	Novel proteoforms (BRAKER)	0.000127907
MSTRG.569.3	NA	NA	NA	NA	NA	NA	NA	NA	Novel proteoforms (BRAKER)	#DIV/0!
ACOC_0000414201-mRNA-1	NA	NA	NA	NA	NA	NA	NA	NA	Reference proteins (WormBase)	#DIV/0!
ACOC_0000943201-mRNA-1	8.51e-07	7.33e-07	1e-06	1e-06	1e-06	1e-06	1e-06	1e-06	Reference proteoforms (WormBase)	9.48e-07
ACOC_0000375001-mRNA-1	5.36e-06	4.59e-06	5e-06	5e-06	5e-06	5e-06	5e-06	5e-06	Proteins from split genes (WormBase)	4.99375e-06
MSTRG.7399.3	NA	NA	NA	NA	NA	NA	NA	NA	Novel proteoforms (BRAKER)	#DIV/0!
MSTRG.9809.1	4.28e-06	4.46e-06	4e-06	4e-06	4e-06	4e-06	4e-06	4e-06	Novel proteoforms (BRAKER)	4.0925e-06
MSTRG.2188.2	NA	NA	NA	NA	NA	NA	NA	NA	Novel proteoforms (BRAKER)	#DIV/0!
MSTRG.5285.2	NA	NA	NA	NA	NA	NA	NA	NA	Novel proteoforms (BRAKER)	#DIV/0!
MSTRG.12631.1	5.71e-06	NA	NA	NA	NA	NA	NA	NA	Novel proteoforms (BRAKER)	5.71e-06
ACOC_0000189301-mRNA-1	NA	5.83e-05	NA	NA	NA	NA	NA	NA	Reference proteins (WormBase)	5.83e-05
MSTRG.5694.1	1.24e-05	1.0185e-05	1.1e-05	1.1e-05	1.1e-05	1.1e-05	1.1e-05	1.1e-05	Novel proteoforms (BRAKER)	1.10731e-05
MSTRG.4922.1	2.745e-06	1.13e-06	2e-06	2e-06	2e-06	2e-06	2e-06	2e-06	Novel proteoforms (BRAKER)	1.98437e-06
MSTRG.4759.1	2.01e-06	NA	NA	NA	NA	NA	NA	NA	Novel proteoforms (BRAKER)	2.01e-06
MSTRG.12482.1	8.27e-06	1.04e-05	9e-06	9e-06	1e-05	9e-06	9e-06	1e-05	Novel proteoforms (BRAKER)	9.33375e-06
MSTRG.9295.1	8.5e-05	6.30333e-05	7.4e-05	7.4e-05	7e-05	7.3e-05	7.2e-05	7.2e-05	Novel proteoforms (BRAKER)	7.28792e-05
MSTRG.2408.1	1.41e-05	1.3e-05	1.4e-05	1.4e-05	1.3e-05	1.3e-05	1.3e-05	1.3e-05	Novel proteoforms (BRAKER)	1.33875e-05
MSTRG.8112.1	3.07e-06	5.195e-06	4e-06	4e-06	4e-06	4e-06	4e-06	4e-06	Novel proteoforms (BRAKER)	4.03312e-06
ACOC_0000989701-mRNA-1	1.67e-05	1.305e-05	1.5e-05	1.5e-05	1.4e-05	1.5e-05	1.5e-05	1.5e-05	Reference proteins (WormBase)	1.48437e-05
ACOC_0000349901-mRNA-1	1.54e-05	1.86e-05	1.7e-05	1.7e-05	1.8e-05	1.7e-05	1.7e-05	1.7e-05	Reference proteins (WormBase)	1.7125e-05
MSTRG.10834.1	NA	NA	NA	NA	NA	NA	NA	NA	Novel proteoforms (BRAKER)	#DIV/0!
ACOC_0000489901-mRNA-1	9.35195e-05	5.65e-05	7.5e-05	7.5e-05	6.9e-05	7.3e-05	7.2e-05	7.1e-05	Reference proteins (WormBase)	7.31274e-05
ACOC_0000662701-mRNA-1	NA	4.53e-05	NA	NA	NA	NA	NA	NA	Reference proteins (WormBase)	4.53e-05
ACOC_0000175301-mRNA-1	4.39333e-05	4.81667e-05	4.6e-05	4.6e-05	4.7e-05	4.6e-05	4.6e-05	4.6e-05	Reference proteoforms (WormBase)	4.61375e-05
MSTRG.562.1	0.000107047	8.86e-05	9.8e-05	9.8e-05	9.5e-05	9.7e-05	9.6e-05	9.6e-05	Novel proteoforms (BRAKER)	9.69559e-05
ACOC_0000412401-mRNA-1	0.000118829	8.34345e-05	0.000101	0.000101	9.5e-05	9.9e-05	9.9e-05	9.8e-05	Reference proteins (WormBase)	9.94079e-05
MSTRG.11502.1	2.68e-06	1.3e-06	2e-06	2e-06	2e-06	2e-06	2e-06	2e-06	Novel proteins (BRAKER)	1.9975e-06
ACOC_0000362201-mRNA-1	1.049e-05	1.45333e-05	1.3e-05	1.3e-05	1.3e-05	1.3e-05	1.3e-05	1.3e-05	Reference proteoforms (WormBase)	1.28779e-05
ACOC_0000501701-mRNA-1	NA	NA	NA	NA	NA	NA	NA	NA	Reference proteoforms (WormBase)	#DIV/0!
MSTRG.11273.1	NA	1.37e-05	NA	NA	NA	NA	NA	NA	Novel proteoforms (BRAKER)	1.37e-05
MSTRG.5831.1	NA	NA	NA	NA	NA	NA	NA	NA	Novel proteins (BRAKER)	#DIV/0!
ACOC_0000923301-mRNA-1	8.78735e-05	6.57267e-05	7.7e-05	7.7e-05	7.3e-05	7.6e-05	7.5e-05	7.5e-05	Reference proteins (WormBase)	7.5825e-05
ACOC_0000261601-mRNA-1	NA	NA	NA	NA	NA	NA	NA	NA	Reference proteins (WormBase)	#DIV/0!
MSTRG.4136.1	6.29e-05	6.935e-05	6.6e-05	6.6e-05	6.7e-05	6.6e-05	6.7e-05	6.7e-05	Novel proteoforms (BRAKER)	6.64063e-05
MSTRG.4340.1	NA	0.000101667	NA	NA	NA	NA	NA	NA	Novel proteoforms (BRAKER)	0.000101667
MSTRG.9392.1	NA	1.27e-05	NA	NA	NA	NA	NA	NA	Novel proteoforms (BRAKER)	1.27e-05
ACOC_0001195201-mRNA-1	NA	NA	NA	NA	NA	NA	NA	NA	Reference proteoforms (WormBase)	#DIV/0!
MSTRG.10447.1	8.895e-06	NA	NA	NA	NA	NA	NA	NA	Proteins from merged genes (BRAKER)	8.895e-06
MSTRG.5866.1	2.63e-06	1.45e-05	9e-06	9e-06	1.1e-05	9e-06	9e-06	1e-05	Novel proteoforms (BRAKER)	9.26625e-06
ACOC_0000331701-mRNA-1	NA	NA	NA	NA	NA	NA	NA	NA	Reference proteoforms (WormBase)	#DIV/0!
MSTRG.3040.1	NA	NA	NA	NA	NA	NA	NA	NA	Novel proteins (BRAKER)	#DIV/0!
MSTRG.750.1	8.04e-06	NA	NA	NA	NA	NA	NA	NA	Proteins from merged genes (BRAKER)	8.04e-06
MSTRG.6051.1	NA	4.93e-06	NA	NA	NA	NA	NA	NA	Novel proteoforms (BRAKER)	4.93e-06
MSTRG.6552.1	NA	NA	NA	NA	NA	NA	NA	NA	Novel proteoforms (BRAKER)	#DIV/0!
ACOC_0000486701-mRNA-1	5.11e-06	5.72e-06	5e-06	5e-06	6e-06	5e-06	5e-06	5e-06	Reference proteins (WormBase)	5.22875e-06
MSTRG.12231.1	6.26e-06	6.80667e-06	7e-06	7e-06	7e-06	7e-06	7e-06	7e-06	Novel proteoforms (BRAKER)	6.88333e-06
ACOC_0001092101-mRNA-1	NA	NA	NA	NA	NA	NA	NA	NA	Reference proteins (WormBase)	#DIV/0!
ACOC_0000996201-mRNA-1	1.115e-05	NA	NA	NA	NA	NA	NA	NA	Reference proteoforms (WormBase)	1.115e-05
MSTRG.223.1	3.11e-05	NA	NA	NA	NA	NA	NA	NA	Novel proteoforms (BRAKER)	3.11e-05
ACOC_0001254501-mRNA-1	5.06e-05	NA	NA	NA	NA	NA	NA	NA	Reference proteoforms (WormBase)	5.06e-05
MSTRG.11060.1	NA	1.11e-05	NA	NA	NA	NA	NA	NA	Novel proteoforms (BRAKER)	1.11e-05
ACOC_0001122101-mRNA-1	0.00128691	0.000844114	0.001066	0.001066	0.000992	0.001041	0.001033	0.001022	Reference proteins (WormBase)	0.00104388
ACOC_0000094501-mRNA-1	0.000471511	0.000668813	0.00057	0.00057	0.000603	0.000581	0.000585	0.00059	Reference proteins (WormBase)	0.000579916
MSTRG.6808.1	0.000131964	NA	NA	NA	NA	NA	NA	NA	Novel proteoforms (BRAKER)	0.000131964
ACOC_0000256501-mRNA-1	0.000108238	0.000184909	0.000147	0.000147	0.000159	0.000151	0.000152	0.000154	Reference proteins (WormBase)	0.000150393
MSTRG.6156.1	4.4e-05	3.09333e-05	3.7e-05	3.7e-05	3.5e-05	3.7e-05	3.6e-05	3.6e-05	Novel proteoforms (BRAKER)	3.66167e-05
MSTRG.919.1	0.000290055	0.00025002	0.00027	0.00027	0.000263	0.000268	0.000267	0.000266	Novel proteoforms (BRAKER)	0.000268009
MSTRG.6293.1	1.85e-05	2.11e-05	2e-05	2e-05	2e-05	2e-05	2e-05	2e-05	Novel proteoforms (BRAKER)	1.995e-05
MSTRG.177.2	NA	8.67e-05	NA	NA	NA	NA	NA	NA	Novel proteoforms (BRAKER)	8.67e-05
MSTRG.12155.1	0.000157408	0.000207433	0.000182	0.000182	0.000191	0.000185	0.000186	0.000187	Novel proteoforms (BRAKER)	0.00018473
MSTRG.4843.1	NA	NA	NA	NA	NA	NA	NA	NA	Novel proteoforms (BRAKER)	#DIV/0!
ACOC_0000485801-mRNA-1	6.83e-05	NA	NA	NA	NA	NA	NA	NA	Reference proteoforms (WormBase)	6.83e-05
ACOC_0001238001-mRNA-1	0.00203518	0.00210913	0.002072	0.002072	0.002084	0.002076	0.002078	0.002079	Proteins from split genes (WormBase)	0.00207566
MSTRG.8775.1	0.000143251	0.000135004	0.000139	0.000139	0.000138	0.000139	0.000139	0.000138	Novel proteoforms (BRAKER)	0.000138782
ACOC_0000770301-mRNA-1	5.23667e-05	3.61e-05	4.4e-05	4.4e-05	4.2e-05	4.3e-05	4.3e-05	4.3e-05	Reference proteins (WormBase)	4.34333e-05
MSTRG.7681.1	1.59667e-05	1.286e-05	1.4e-05	1.4e-05	1.4e-05	1.4e-05	1.4e-05	1.4e-05	Novel proteoforms (BRAKER)	1.41033e-05
ACOC_0000027901-mRNA-1	1.57e-05	8.81333e-06	1.2e-05	1.2e-05	1.1e-05	1.2e-05	1.2e-05	1.2e-05	Reference proteoforms (WormBase)	1.19392e-05
ACOC_0000958601-mRNA-1	7.22e-06	4.46e-05	2.6e-05	2.6e-05	3.2e-05	2.8e-05	2.9e-05	3e-05	Reference proteins (WormBase)	2.78525e-05
MSTRG.5726.1	6.48333e-06	7.01667e-06	7e-06	7e-06	7e-06	7e-06	7e-06	7e-06	Novel proteoforms (BRAKER)	6.9375e-06
MSTRG.969.2	1.12633e-05	1.63667e-05	1.4e-05	1.4e-05	1.5e-05	1.4e-05	1.4e-05	1.4e-05	Novel proteoforms (BRAKER)	1.40788e-05
ACOC_0000701001-mRNA-1	2.48333e-05	3.08333e-05	2.8e-05	2.8e-05	2.9e-05	2.8e-05	2.8e-05	2.8e-05	Reference proteins (WormBase)	2.80833e-05
MSTRG.6196.1	0.000100567	7.90667e-05	9e-05	9e-05	8.6e-05	8.9e-05	8.8e-05	8.8e-05	Novel proteins (BRAKER)	8.88292e-05
MSTRG.2928.1	4.07667e-06	1.58033e-05	1e-05	1e-05	1.2e-05	1.1e-05	1.1e-05	1.1e-05	Proteins from merged genes (BRAKER)	1.061e-05
ACOC_0000580301-mRNA-1	4.77e-05	3.57e-05	4.2e-05	4.2e-05	4e-05	4.1e-05	4.1e-05	4.1e-05	Reference proteins (WormBase)	4.13e-05
MSTRG.1722.1	2.104e-05	4.49333e-05	3.3e-05	3.3e-05	3.7e-05	3.4e-05	3.5e-05	3.5e-05	Novel proteoforms (BRAKER)	3.41217e-05
MSTRG.4429.1	1.45e-05	1.65667e-05	1.6e-05	1.6e-05	1.6e-05	1.6e-05	1.6e-05	1.6e-05	Novel proteoforms (BRAKER)	1.58833e-05
ACOC_0001164801-mRNA-1	6.02e-05	6.62667e-05	6.3e-05	6.3e-05	6.4e-05	6.4e-05	6.4e-05	6.4e-05	Proteins from split genes (WormBase)	6.35583e-05
MSTRG.5323.1	2.47e-05	1.245e-05	1.9e-05	1.9e-05	1.7e-05	1.8e-05	1.8e-05	1.7e-05	Novel proteoforms (BRAKER)	1.81438e-05
MSTRG.8893.1	3.08333e-05	2.96e-05	3e-05	3e-05	3e-05	3e-05	3e-05	3e-05	Proteins from merged genes (BRAKER)	3.00542e-05
MSTRG.10492.1	7.455e-06	7.28e-06	7e-06	7e-06	7e-06	7e-06	7e-06	7e-06	Proteins from merged genes (BRAKER)	7.09188e-06
MSTRG.11299.1	4.29233e-06	5.87e-06	5e-06	5e-06	5e-06	5e-06	5e-06	5e-06	Proteins from merged genes (BRAKER)	5.02029e-06
MSTRG.4300.1	6.51e-06	5.4e-06	6e-06	6e-06	6e-06	6e-06	6e-06	6e-06	Novel proteoforms (BRAKER)	5.98875e-06
MSTRG.589.1	1.08e-05	NA	NA	NA	NA	NA	NA	NA	Novel proteoforms (BRAKER)	1.08e-05
MSTRG.5823.2	6.24667e-06	3.57333e-06	5e-06	5e-06	4e-06	5e-06	5e-06	5e-06	Novel proteoforms (BRAKER)	4.8525e-06
MSTRG.10646.1	8.76333e-06	9.915e-06	9e-06	9e-06	1e-05	9e-06	9e-06	9e-06	Novel proteins (BRAKER)	9.20979e-06
ACOC_0000932301-mRNA-1	0.000152185	0.000136973	0.000145	0.000145	0.000142	0.000144	0.000143	0.000143	Reference proteoforms (WormBase)	0.000143895
MSTRG.1169.1	1.863e-05	4.53667e-05	3.2e-05	3.2e-05	3.6e-05	3.3e-05	3.4e-05	3.5e-05	Novel proteoforms (BRAKER)	3.32496e-05
MSTRG.4972.1	NA	0.000175208	NA	NA	NA	NA	NA	NA	Novel proteoforms (BRAKER)	0.000175208
MSTRG.8783.1	7.48e-06	8.21e-06	8e-06	8e-06	8e-06	8e-06	8e-06	8e-06	Novel proteoforms (BRAKER)	7.96125e-06
ACOC_0000890001-mRNA-1	0.0198574	0.018446	0.019152	0.019152	0.018916	0.019073	0.019047	0.019012	Reference proteins (WormBase)	0.0190819
ACOC_0001039401-mRNA-1	NA	0.0178161	NA	NA	NA	NA	NA	NA	Reference proteoforms (WormBase)	0.0178161
MSTRG.11759.1	0.00156252	0.00165073	0.001607	0.001607	0.001621	0.001612	0.001613	0.001615	Novel proteins (BRAKER)	0.00161103
MSTRG.8896.1	0.00238971	0.00205929	0.002224	0.002224	0.002169	0.002206	0.0022	0.002192	Novel proteoforms (BRAKER)	0.002208
MSTRG.11534.1	0.00650466	0.00467109	0.005588	0.005588	0.005282	0.005486	0.005452	0.005407	Novel proteoforms (BRAKER)	0.00549734
MSTRG.433.1	0.00139049	0.00138094	0.001386	0.001386	0.001384	0.001385	0.001385	0.001385	Novel proteoforms (BRAKER)	0.0013853
MSTRG.10173.1	0.0015621	0.00176894	0.001666	0.001666	0.0017	0.001677	0.001681	0.001686	Proteins from merged genes (BRAKER)	0.00167588
MSTRG.10553.2	0.00017445	NA	NA	NA	NA	NA	NA	NA	Novel proteoforms (BRAKER)	0.00017445
MSTRG.7274.1	0.00306139	0.00322266	0.003142	0.003142	0.003169	0.003151	0.003154	0.003158	Proteins from merged genes (BRAKER)	0.00315001
MSTRG.8680.1	9.7964e-05	9.68143e-05	9.7e-05	9.7e-05	9.7e-05	9.7e-05	9.7e-05	9.7e-05	Novel proteoforms (BRAKER)	9.70973e-05
MSTRG.6227.1	0.000463124	0.000381741	0.000422	0.000422	0.000409	0.000418	0.000416	0.000414	Novel proteoforms (BRAKER)	0.000418233
MSTRG.7457.4	0.00222664	0.00198886	0.002108	0.002108	0.002068	0.002095	0.00209	0.002084	Proteins from merged genes (BRAKER)	0.00209606
MSTRG.2500.1	NA	NA	NA	NA	NA	NA	NA	NA	Proteins from merged genes (BRAKER)	#DIV/0!
MSTRG.7154.1	8.48e-05	NA	NA	NA	NA	NA	NA	NA	Novel proteoforms (BRAKER)	8.48e-05
ACOC_0001159801-mRNA-1	0.00326109	0.00304394	0.003153	0.003153	0.003116	0.00314	0.003136	0.003131	Reference proteins (WormBase)	0.00314175
MSTRG.5039.1	0.000806326	0.000614001	0.00071	0.00071	0.000678	0.000699	0.000696	0.000691	Novel proteoforms (BRAKER)	0.000700541
ACOC_0000400501-mRNA-1	0.000645761	0.000965753	0.000806	0.000806	0.000859	0.000824	0.000829	0.000837	Reference proteoforms (WormBase)	0.000821564
ACOC_0001301701-mRNA-1	0.000179751	0.000144822	0.000162	0.000162	0.000156	0.00016	0.00016	0.000159	Reference proteoforms (WormBase)	0.000160447
ACOC_0000586901-mRNA-1	0.000375335	0.00028132	0.000328	0.000328	0.000313	0.000323	0.000321	0.000319	Reference proteins (WormBase)	0.000323582
MSTRG.1092.1	0.000120384	0.000112381	0.000116	0.000116	0.000115	0.000116	0.000116	0.000116	Novel proteoforms (BRAKER)	0.000115971
MSTRG.10583.1	0.000620797	0.000891576	0.000756	0.000756	0.000801	0.000771	0.000776	0.000783	Novel proteoforms (BRAKER)	0.000769422
ACOC_0000498601-mRNA-1	0.000131736	0.000213304	0.000173	0.000173	0.000186	0.000177	0.000179	0.000181	Reference proteoforms (WormBase)	0.000176755
MSTRG.4970.3	NA	0.000832019	NA	NA	NA	NA	NA	NA	Novel proteoforms (BRAKER)	0.000832019
MSTRG.6146.1	6.66333e-05	6.21e-05	6.4e-05	6.4e-05	6.4e-05	6.4e-05	6.4e-05	6.4e-05	Novel proteoforms (BRAKER)	6.40917e-05
ACOC_0000621801-mRNA-1	NA	NA	NA	NA	NA	NA	NA	NA	Reference proteoforms (WormBase)	#DIV/0!
MSTRG.10184.1	4.55e-05	4.63e-05	4.6e-05	4.6e-05	4.6e-05	4.6e-05	4.6e-05	4.6e-05	Novel proteoforms (BRAKER)	4.5975e-05
ACOC_0000834501-mRNA-1	0.00186975	0.00154642	0.001708	0.001708	0.001654	0.00169	0.001684	0.001676	Reference proteins (WormBase)	0.00169202
MSTRG.3053.1	0.00046352	0.000557187	0.00051	0.00051	0.000526	0.000516	0.000517	0.00052	Novel proteoforms (BRAKER)	0.000514963
ACOC_0000091101-mRNA-1	0.000137167	0.000141685	0.000139	0.000139	0.00014	0.00014	0.00014	0.00014	Reference proteoforms (WormBase)	0.000139606
MSTRG.6303.2	0.000490341	0.000458142	0.000474	0.000474	0.000469	0.000472	0.000472	0.000471	Novel proteoforms (BRAKER)	0.00047256
MSTRG.4449.1	0.000565256	0.000465542	0.000515	0.000515	0.000499	0.00051	0.000508	0.000506	Novel proteoforms (BRAKER)	0.000510475
MSTRG.438.1	0.000544964	0.00066343	0.000604	0.000604	0.000624	0.000611	0.000613	0.000616	Novel proteoforms (BRAKER)	0.000610049
MSTRG.156.2	0.000126494	0.000103308	0.000115	0.000115	0.000111	0.000114	0.000113	0.000113	Novel proteoforms (BRAKER)	0.00011385
ACOC_0001101101-mRNA-1	0.000270173	0.000217917	0.000244	0.000244	0.000235	0.000241	0.00024	0.000239	Reference proteins (WormBase)	0.000241386
MSTRG.1777.1	2.02e-05	1.05567e-05	1.5e-05	1.5e-05	1.4e-05	1.5e-05	1.5e-05	1.4e-05	Proteins from merged genes (BRAKER)	1.48446e-05
ACOC_0000223701-mRNA-1	0.000253267	0.000167545	0.00021	0.00021	0.000196	0.000206	0.000204	0.000202	Reference proteins (WormBase)	0.000206101
MSTRG.10665.1	0.00724543	0.00489473	0.00607	0.00607	0.005678	0.005939	0.005896	0.005838	Novel proteoforms (BRAKER)	0.00595389
MSTRG.6444.1	0.000269253	0.000402472	0.000336	0.000336	0.000358	0.000343	0.000346	0.000349	Novel proteoforms (BRAKER)	0.000342466
ACOC_0000100701-mRNA-1	7.7e-05	8.61667e-05	8.2e-05	8.2e-05	8.3e-05	8.2e-05	8.2e-05	8.2e-05	Reference proteoforms (WormBase)	8.20208e-05
MSTRG.11067.1	0.000281818	NA	NA	NA	NA	NA	NA	NA	Novel proteoforms (BRAKER)	0.000281818
MSTRG.10058.1	0.000102991	0.000148434	0.000126	0.000126	0.000133	0.000128	0.000129	0.00013	Novel proteoforms (BRAKER)	0.000127928
MSTRG.12187.1	0.000154122	0.00015594	0.000155	0.000155	0.000155	0.000155	0.000155	0.000155	Novel proteoforms (BRAKER)	0.000155008
ACOC_0001180601-mRNA-1	4.84e-05	2.21333e-05	3.5e-05	3.5e-05	3.1e-05	3.4e-05	3.3e-05	3.3e-05	Proteins from split genes (WormBase)	3.39417e-05
MSTRG.5315.1	0.000171022	0.000174413	0.000173	0.000173	0.000173	0.000173	0.000173	0.000173	Novel proteoforms (BRAKER)	0.000172929
MSTRG.1319.1	2.67667e-05	3.01e-05	2.8e-05	2.8e-05	2.9e-05	2.9e-05	2.9e-05	2.9e-05	Novel proteoforms (BRAKER)	2.86083e-05
MSTRG.6466.1	0.000147258	0.000106504	0.000127	0.000127	0.00012	0.000125	0.000124	0.000123	Proteins from merged genes (BRAKER)	0.00012497
MSTRG.164.1	1.4e-05	1.595e-05	1.5e-05	1.5e-05	1.5e-05	1.5e-05	1.5e-05	1.5e-05	Novel proteoforms (BRAKER)	1.49938e-05
ACOC_0000482701-mRNA-1	1.725e-05	3.75e-05	2.7e-05	2.7e-05	3.1e-05	2.9e-05	2.9e-05	2.9e-05	Reference proteins (WormBase)	2.83437e-05
MSTRG.4106.1	2.3e-05	NA	NA	NA	NA	NA	NA	NA	Novel proteoforms (BRAKER)	2.3e-05
ACOC_0000103301-mRNA-1	1.28e-05	1.365e-05	1.3e-05	1.3e-05	1.3e-05	1.3e-05	1.3e-05	1.3e-05	Reference proteins (WormBase)	1.30563e-05
ACOC_0001334601-mRNA-1	NA	NA	NA	NA	NA	NA	NA	NA	Reference proteins (WormBase)	#DIV/0!
MSTRG.9254.1	2.97367e-05	5.515e-05	4.2e-05	4.2e-05	4.7e-05	4.4e-05	4.4e-05	4.5e-05	Novel proteoforms (BRAKER)	4.36108e-05
MSTRG.7523.1	1.1535e-05	9.89e-06	1.1e-05	1.1e-05	1e-05	1.1e-05	1.1e-05	1.1e-05	Novel proteins (BRAKER)	1.08031e-05
MSTRG.3456.1	0.000125461	0.000142055	0.000134	0.000134	0.000137	0.000135	0.000135	0.000135	Novel proteoforms (BRAKER)	0.000134689
MSTRG.5628.1	5.98e-06	7.85e-06	7e-06	7e-06	7e-06	7e-06	7e-06	7e-06	Novel proteoforms (BRAKER)	6.97875e-06
MSTRG.3572.1	9.73e-06	8.63e-06	9e-06	9e-06	9e-06	9e-06	9e-06	9e-06	Novel proteoforms (BRAKER)	9.045e-06
MSTRG.5274.1	0.000112149	0.000221405	0.000167	0.000167	0.000185	0.000173	0.000175	0.000178	Novel proteoforms (BRAKER)	0.000172319
MSTRG.7302.1	NA	NA	NA	NA	NA	NA	NA	NA	Novel proteoforms (BRAKER)	#DIV/0!
MSTRG.6055.1	1.97e-05	9.59e-06	1.5e-05	1.5e-05	1.3e-05	1.4e-05	1.4e-05	1.4e-05	Novel proteoforms (BRAKER)	1.42863e-05
MSTRG.11575.1	9.25e-06	1.06867e-05	1e-05	1e-05	1e-05	1e-05	1e-05	1e-05	Proteins from merged genes (BRAKER)	9.99209e-06
MSTRG.4596.1	1.9e-05	1.55e-05	1.7e-05	1.7e-05	1.7e-05	1.7e-05	1.7e-05	1.7e-05	Novel proteoforms (BRAKER)	1.70625e-05
ACOC_0000403201-mRNA-1	3.45e-05	5.02333e-05	4.2e-05	4.2e-05	4.5e-05	4.3e-05	4.4e-05	4.4e-05	Reference proteoforms (WormBase)	4.30917e-05
MSTRG.10525.1	7.04e-06	0.000165267	8.6e-05	8.6e-05	0.000113	9.5e-05	9.8e-05	0.000102	Novel proteoforms (BRAKER)	9.40384e-05
MSTRG.8503.1	0.000114821	6.82847e-05	9.2e-05	9.2e-05	8.4e-05	8.9e-05	8.8e-05	8.7e-05	Novel proteoforms (BRAKER)	8.93882e-05
MSTRG.3695.1	9.10333e-06	9.08e-06	9e-06	9e-06	9e-06	9e-06	9e-06	9e-06	Novel proteoforms (BRAKER)	9.02292e-06
MSTRG.9180.1	NA	2.08e-06	NA	NA	NA	NA	NA	NA	Novel proteoforms (BRAKER)	2.08e-06
MSTRG.783.1	7.35e-06	NA	NA	NA	NA	NA	NA	NA	Novel proteoforms (BRAKER)	7.35e-06
MSTRG.7680.1	8.245e-07	NA	NA	NA	NA	NA	NA	NA	Novel proteoforms (BRAKER)	8.245e-07
ACOC_0000387901-mRNA-1	7.94e-05	6.16e-05	7.1e-05	7.1e-05	6.8e-05	7e-05	6.9e-05	6.9e-05	Reference proteoforms (WormBase)	6.9875e-05
MSTRG.3332.1	5.615e-05	3.62e-05	4.6e-05	4.6e-05	4.3e-05	4.5e-05	4.5e-05	4.4e-05	Novel proteoforms (BRAKER)	4.51688e-05
MSTRG.4042.1	3.17e-05	3.1e-05	3.1e-05	3.1e-05	3.1e-05	3.1e-05	3.1e-05	3.1e-05	Novel proteoforms (BRAKER)	3.10875e-05
MSTRG.9239.1	9.85e-05	NA	NA	NA	NA	NA	NA	NA	Novel proteoforms (BRAKER)	9.85e-05
ACOC_0000208301-mRNA-1	2.16333e-05	1.97333e-05	2.1e-05	2.1e-05	2e-05	2.1e-05	2.1e-05	2e-05	Reference proteins (WormBase)	2.06708e-05
MSTRG.8939.1	0.00123024	0.000519619	0.000875	0.000875	0.000756	0.000835	0.000822	0.000805	Novel proteins (BRAKER)	0.000839732
ACOC_0000391801-mRNA-1	0.0017326	0.00156495	0.001649	0.001649	0.001621	0.001639	0.001636	0.001632	Reference proteoforms (WormBase)	0.00164044
ACOC_0000830601-mRNA-1	2.255e-06	NA	NA	NA	NA	NA	NA	NA	Reference proteins (WormBase)	2.255e-06
ACOC_0000468201-mRNA-1	1.0265e-05	1.05867e-05	1e-05	1e-05	1e-05	1e-05	1e-05	1e-05	Reference proteins (WormBase)	1.01065e-05
ACOC_0000593401-mRNA-1	6.36e-05	3.115e-05	4.7e-05	4.7e-05	4.2e-05	4.6e-05	4.5e-05	4.4e-05	Proteins from split genes (WormBase)	4.57187e-05
MSTRG.7142.1	1.42e-05	1.38767e-05	1.4e-05	1.4e-05	1.4e-05	1.4e-05	1.4e-05	1.4e-05	Novel proteoforms (BRAKER)	1.40096e-05
MSTRG.6031.1	1.19e-06	NA	NA	NA	NA	NA	NA	NA	Proteins from merged genes (BRAKER)	1.19e-06
MSTRG.1215.1	NA	NA	NA	NA	NA	NA	NA	NA	Proteins from merged genes (BRAKER)	#DIV/0!
ACOC_0000039001-mRNA-1	NA	NA	NA	NA	NA	NA	NA	NA	Reference proteins (WormBase)	#DIV/0!
MSTRG.10094.1	3.98e-06	4.11e-06	4e-06	4e-06	4e-06	4e-06	4e-06	4e-06	Proteins from merged genes (BRAKER)	4.01125e-06
MSTRG.5623.1	1.52e-06	1.74e-05	9e-06	9e-06	1.2e-05	1e-05	1.1e-05	1.1e-05	Novel proteoforms (BRAKER)	1.0115e-05
MSTRG.12920.1	6.125e-05	NA	NA	NA	NA	NA	NA	NA	Novel proteins (BRAKER)	6.125e-05
MSTRG.8235.1	NA	NA	NA	NA	NA	NA	NA	NA	Novel proteoforms (BRAKER)	#DIV/0!
MSTRG.6828.1	NA	8.66e-07	NA	NA	NA	NA	NA	NA	Novel proteoforms (BRAKER)	8.66e-07
MSTRG.8067.1	NA	NA	NA	NA	NA	NA	NA	NA	Novel proteoforms (BRAKER)	#DIV/0!
MSTRG.4282.1	3.625e-06	3.55e-06	4e-06	4e-06	4e-06	4e-06	4e-06	4e-06	Novel proteoforms (BRAKER)	3.89687e-06
ACOC_0000601401-mRNA-1	NA	9.88e-06	NA	NA	NA	NA	NA	NA	Reference proteins (WormBase)	9.88e-06
MSTRG.2237.1	7.14e-06	NA	NA	NA	NA	NA	NA	NA	Novel proteoforms (BRAKER)	7.14e-06
MSTRG.7675.4	0.00038938	0.000356324	0.000373	0.000373	0.000367	0.000371	0.00037	0.00037	Novel proteoforms (BRAKER)	0.000371213
MSTRG.883.1	0.000198951	NA	NA	NA	NA	NA	NA	NA	Novel proteoforms (BRAKER)	0.000198951
ACOC_0001184101-mRNA-1	8.33333e-05	6.79667e-05	7.6e-05	7.6e-05	7.3e-05	7.5e-05	7.5e-05	7.4e-05	Reference proteins (WormBase)	7.50375e-05
MSTRG.9529.1	NA	1.6e-05	NA	NA	NA	NA	NA	NA	Novel proteoforms (BRAKER)	1.6e-05
ACOC_0000382501-mRNA-1	NA	NA	NA	NA	NA	NA	NA	NA	Reference proteoforms (WormBase)	#DIV/0!
ACOC_0000697401-mRNA-1	NA	NA	NA	NA	NA	NA	NA	NA	Reference proteoforms (WormBase)	#DIV/0!
MSTRG.9004.1	NA	1.2e-06	NA	NA	NA	NA	NA	NA	Proteins from merged genes (BRAKER)	1.2e-06
MSTRG.7476.1	1.94e-05	1.56e-05	1.8e-05	1.8e-05	1.7e-05	1.7e-05	1.7e-05	1.7e-05	Novel proteoforms (BRAKER)	1.7375e-05
MSTRG.11748.1	0.000170185	0.000187999	0.000179	0.000179	0.000182	0.00018	0.00018	0.000181	Novel proteoforms (BRAKER)	0.000179898
MSTRG.5897.1	1.05567e-06	NA	NA	NA	NA	NA	NA	NA	Novel proteoforms (BRAKER)	1.05567e-06
ACOC_0000619801-mRNA-1	0.000203199	0.000209501	0.000206	0.000206	0.000207	0.000207	0.000207	0.000207	Reference proteoforms (WormBase)	0.000206587
ACOC_0000025001-mRNA-1	4.06e-05	6.40333e-05	5.2e-05	5.2e-05	5.6e-05	5.4e-05	5.4e-05	5.5e-05	Reference proteoforms (WormBase)	5.34542e-05
MSTRG.2294.1	9.44e-07	NA	NA	NA	NA	NA	NA	NA	Proteins from merged genes (BRAKER)	9.44e-07
MSTRG.8290.1	0.000905988	0.000505927	0.000706	0.000706	0.000639	0.000684	0.000676	0.000666	Novel proteoforms (BRAKER)	0.000686114
MSTRG.4726.1	0.000484338	0.000674692	0.00058	0.00058	0.000611	0.00059	0.000594	0.000598	Novel proteoforms (BRAKER)	0.000589004
ACOC_0000667201-mRNA-1	NA	NA	NA	NA	NA	NA	NA	NA	Reference proteoforms (WormBase)	#DIV/0!
MSTRG.398.3	0.000648269	0.000535226	0.000592	0.000592	0.000573	0.000585	0.000583	0.000581	Proteins from merged genes (BRAKER)	0.000586187
MSTRG.7463.2	1.97833e-05	4.32e-05	3.1e-05	3.1e-05	3.5e-05	3.3e-05	3.3e-05	3.4e-05	Novel proteoforms (BRAKER)	3.24979e-05
MSTRG.6770.1	3.71667e-06	6.48667e-06	5e-06	5e-06	6e-06	5e-06	5e-06	5e-06	Novel proteoforms (BRAKER)	5.15042e-06
MSTRG.5416.1	6.28e-05	6.56333e-05	6.4e-05	6.4e-05	6.5e-05	6.4e-05	6.4e-05	6.4e-05	Novel proteoforms (BRAKER)	6.41792e-05
ACOC_0000547501-mRNA-1	3.09e-05	0.000219386	0.000125	0.000125	0.000157	0.000136	0.000139	0.000144	Reference proteins (WormBase)	0.000134536
MSTRG.3655.1	2.12667e-05	2.28767e-05	2.2e-05	2.2e-05	2.2e-05	2.2e-05	2.2e-05	2.2e-05	Novel proteoforms (BRAKER)	2.20179e-05
MSTRG.9920.1	2.591e-06	2.68e-05	1.5e-05	1.5e-05	1.9e-05	1.6e-05	1.6e-05	1.7e-05	Proteins from merged genes (BRAKER)	1.59239e-05
ACOC_0000046801-mRNA-1	8.91667e-06	5.17e-06	7e-06	7e-06	6e-06	7e-06	7e-06	7e-06	Reference proteins (WormBase)	6.88583e-06
MSTRG.5746.1	2.17333e-05	2.21667e-05	2.2e-05	2.2e-05	2.2e-05	2.2e-05	2.2e-05	2.2e-05	Novel proteoforms (BRAKER)	2.19875e-05
MSTRG.9173.1	2.085e-05	5.835e-05	4e-05	4e-05	4.6e-05	4.2e-05	4.2e-05	4.3e-05	Novel proteoforms (BRAKER)	4.1525e-05
MSTRG.6164.1	1.3e-05	2.12e-05	1.7e-05	1.7e-05	1.8e-05	1.8e-05	1.8e-05	1.8e-05	Novel proteoforms (BRAKER)	1.7525e-05
MSTRG.10821.1	9.18e-05	NA	NA	NA	NA	NA	NA	NA	Novel proteins (BRAKER)	9.18e-05
MSTRG.1621.1	NA	NA	NA	NA	NA	NA	NA	NA	Novel proteoforms (BRAKER)	#DIV/0!
MSTRG.9046.1	0.00137295	0.000994296	0.001184	0.001184	0.001121	0.001163	0.001156	0.001146	Novel proteins (BRAKER)	0.00116516
MSTRG.1375.1	2.145e-05	1.87e-05	2e-05	2e-05	2e-05	2e-05	2e-05	2e-05	Novel proteoforms (BRAKER)	2.00187e-05
MSTRG.12688.1	NA	3.85e-05	NA	NA	NA	NA	NA	NA	Novel proteoforms (BRAKER)	3.85e-05
MSTRG.7527.1	4.32e-06	4.11e-06	4e-06	4e-06	4e-06	4e-06	4e-06	4e-06	Novel proteoforms (BRAKER)	4.05375e-06
MSTRG.10509.1	5.51667e-06	7.72e-06	7e-06	7e-06	7e-06	7e-06	7e-06	7e-06	Novel proteoforms (BRAKER)	6.90458e-06
MSTRG.5702.1	0.000470553	0.000490916	0.000481	0.000481	0.000484	0.000482	0.000482	0.000483	Novel proteoforms (BRAKER)	0.000481809
MSTRG.8371.1	4.4e-06	NA	NA	NA	NA	NA	NA	NA	Novel proteoforms (BRAKER)	4.4e-06
MSTRG.8443.1	2.37e-06	6.19e-06	4e-06	4e-06	5e-06	4e-06	5e-06	5e-06	Novel proteoforms (BRAKER)	4.445e-06
ACOC_0000624501-mRNA-1	9.7e-06	NA	NA	NA	NA	NA	NA	NA	Proteins from split genes (WormBase)	9.7e-06
ACOC_0001323001-mRNA-1	3.02333e-05	2.05e-05	2.5e-05	2.5e-05	2.4e-05	2.5e-05	2.5e-05	2.4e-05	Reference proteins (WormBase)	2.48417e-05
MSTRG.5720.1	1.904e-05	2.73333e-05	2.3e-05	2.3e-05	2.5e-05	2.4e-05	2.4e-05	2.4e-05	Novel proteins (BRAKER)	2.36717e-05
MSTRG.4440.1	2.605e-05	2.285e-05	2.4e-05	2.4e-05	2.4e-05	2.4e-05	2.4e-05	2.4e-05	Novel proteoforms (BRAKER)	2.41125e-05
MSTRG.11485.2	0.000173808	1.491e-05	9.4e-05	9.4e-05	6.8e-05	8.6e-05	8.3e-05	7.9e-05	Proteins from merged genes (BRAKER)	8.65897e-05
MSTRG.2133.1	1.46e-06	NA	NA	NA	NA	NA	NA	NA	Novel proteoforms (BRAKER)	1.46e-06
ACOC_0001231701-mRNA-1	NA	NA	NA	NA	NA	NA	NA	NA	Reference proteoforms (WormBase)	#DIV/0!
MSTRG.5619.1	NA	6.36e-05	NA	NA	NA	NA	NA	NA	Novel proteoforms (BRAKER)	6.36e-05
MSTRG.9395.1	1.49e-05	8.06e-06	1.1e-05	1.1e-05	1e-05	1.1e-05	1.1e-05	1.1e-05	Novel proteoforms (BRAKER)	1.0995e-05
MSTRG.11742.1	1.0755e-05	1.0215e-05	1e-05	1e-05	1e-05	1e-05	1e-05	1e-05	Novel proteoforms (BRAKER)	1.01212e-05
MSTRG.4436.2	NA	3.65e-05	NA	NA	NA	NA	NA	NA	Novel proteoforms (BRAKER)	3.65e-05
MSTRG.11126.1	1.35e-06	NA	NA	NA	NA	NA	NA	NA	Novel proteoforms (BRAKER)	1.35e-06
MSTRG.9157.1	0.00103002	0.000278992	0.000655	0.000655	0.000529	0.000613	0.000599	0.00058	Novel proteoforms (BRAKER)	0.000617502
MSTRG.5211.1	9.215e-06	9.55e-06	9e-06	9e-06	9e-06	9e-06	9e-06	9e-06	Novel proteoforms (BRAKER)	9.09563e-06
MSTRG.3109.1	0.00013195	0.000114887	0.000123	0.000123	0.000121	0.000122	0.000122	0.000122	Novel proteins (BRAKER)	0.00012248
MSTRG.8813.1	2.31e-05	NA	NA	NA	NA	NA	NA	NA	Novel proteoforms (BRAKER)	2.31e-05
MSTRG.815.1	NA	NA	NA	NA	NA	NA	NA	NA	Novel proteoforms (BRAKER)	#DIV/0!
ACOC_0000499101-mRNA-1	NA	NA	NA	NA	NA	NA	NA	NA	Reference proteins (WormBase)	#DIV/0!
ACOC_0000184701-mRNA-1	0.000159027	0.000221468	0.00019	0.00019	0.000201	0.000194	0.000195	0.000196	Reference proteins (WormBase)	0.000193312
ACOC_0001167701-mRNA-1	NA	NA	NA	NA	NA	NA	NA	NA	Reference proteins (WormBase)	#DIV/0!
ACOC_0000445901-mRNA-1	2.185e-05	1.355e-05	1.8e-05	1.8e-05	1.6e-05	1.7e-05	1.7e-05	1.7e-05	Reference proteoforms (WormBase)	1.73e-05
ACOC_0000548101-mRNA-1	1.182e-05	1.64e-05	1.4e-05	1.4e-05	1.5e-05	1.4e-05	1.4e-05	1.5e-05	Proteins from split genes (WormBase)	1.42775e-05
MSTRG.2562.1	3.76e-06	NA	NA	NA	NA	NA	NA	NA	Novel proteoforms (BRAKER)	3.76e-06
MSTRG.1402.2	NA	NA	NA	NA	NA	NA	NA	NA	Novel proteoforms (BRAKER)	#DIV/0!
ACOC_0000380301-mRNA-1	1.67e-06	NA	NA	NA	NA	NA	NA	NA	Reference proteoforms (WormBase)	1.67e-06
MSTRG.9969.1	9.26e-06	NA	NA	NA	NA	NA	NA	NA	Novel proteoforms (BRAKER)	9.26e-06
ACOC_0000361101-mRNA-1	2.15e-06	1.99e-06	2e-06	2e-06	2e-06	2e-06	2e-06	2e-06	Reference proteoforms (WormBase)	2.0175e-06
MSTRG.12774.1	1.47e-05	NA	NA	NA	NA	NA	NA	NA	Novel proteins (BRAKER)	1.47e-05
MSTRG.6489.1	1.435e-05	1.77e-05	1.6e-05	1.6e-05	1.7e-05	1.6e-05	1.6e-05	1.6e-05	Novel proteoforms (BRAKER)	1.61312e-05
MSTRG.9270.1	NA	NA	NA	NA	NA	NA	NA	NA	Novel proteoforms (BRAKER)	#DIV/0!
MSTRG.11407.1	1.43e-05	1.84e-05	1.6e-05	1.6e-05	1.7e-05	1.7e-05	1.7e-05	1.7e-05	Novel proteoforms (BRAKER)	1.65875e-05
MSTRG.7913.1	NA	NA	NA	NA	NA	NA	NA	NA	Novel proteoforms (BRAKER)	#DIV/0!
MSTRG.11679.1	NA	NA	NA	NA	NA	NA	NA	NA	Proteins from merged genes (BRAKER)	#DIV/0!
ACOC_0000959501-mRNA-1	NA	NA	NA	NA	NA	NA	NA	NA	Reference proteins (WormBase)	#DIV/0!
MSTRG.10475.1	1.53e-05	2.28e-05	1.9e-05	1.9e-05	2e-05	1.9e-05	2e-05	2e-05	Novel proteoforms (BRAKER)	1.93875e-05
MSTRG.12217.1	NA	NA	NA	NA	NA	NA	NA	NA	Novel proteoforms (BRAKER)	#DIV/0!
MSTRG.587.1	NA	NA	NA	NA	NA	NA	NA	NA	Novel proteoforms (BRAKER)	#DIV/0!
MSTRG.1006.1	1.23e-06	NA	NA	NA	NA	NA	NA	NA	Proteins from merged genes (BRAKER)	1.23e-06
MSTRG.5411.1	NA	NA	NA	NA	NA	NA	NA	NA	Novel proteoforms (BRAKER)	#DIV/0!
ACOC_0000152401-mRNA-1	NA	8.87e-06	NA	NA	NA	NA	NA	NA	Reference proteoforms (WormBase)	8.87e-06
MSTRG.9472.1	0.000105078	8.3888e-05	9.4e-05	9.4e-05	9.1e-05	9.3e-05	9.3e-05	9.2e-05	Novel proteoforms (BRAKER)	9.32457e-05
MSTRG.6972.1	0.00429127	0.00370449	0.003998	0.003998	0.0039	0.003965	0.003954	0.00394	Novel proteoforms (BRAKER)	0.00396884
MSTRG.4417.1	6.74e-05	8.43967e-05	7.6e-05	7.6e-05	7.9e-05	7.7e-05	7.7e-05	7.8e-05	Novel proteoforms (BRAKER)	7.68496e-05
MSTRG.9548.3	0.000383955	0.000284291	0.000334	0.000334	0.000318	0.000329	0.000327	0.000324	Proteins from merged genes (BRAKER)	0.000329281
ACOC_0000052601-mRNA-1	0.00209071	0.00203114	0.002061	0.002061	0.002051	0.002058	0.002057	0.002055	Reference proteins (WormBase)	0.00205811
ACOC_0001312401-mRNA-1	0.00160426	0.0015875	0.001596	0.001596	0.001593	0.001595	0.001595	0.001594	Reference proteins (WormBase)	0.0015951
MSTRG.1137.1	0.00159867	0.0013606	0.00148	0.00148	0.00144	0.001466	0.001462	0.001456	Novel proteoforms (BRAKER)	0.00146791
MSTRG.9398.1	0.000681774	0.000733204	0.000707	0.000707	0.000716	0.00071	0.000711	0.000713	Novel proteoforms (BRAKER)	0.000709872
MSTRG.12125.1	0.000244855	0.000284983	0.000265	0.000265	0.000272	0.000267	0.000268	0.000269	Novel proteoforms (BRAKER)	0.00026698
ACOC_0000309101-mRNA-1	0.000362993	0.000370494	0.000367	0.000367	0.000368	0.000367	0.000367	0.000367	Reference proteins (WormBase)	0.000367061
MSTRG.8036.3	3.72e-05	4.76667e-05	4.2e-05	4.2e-05	4.4e-05	4.3e-05	4.3e-05	4.3e-05	Proteins from merged genes (BRAKER)	4.27333e-05
ACOC_0001058401-mRNA-1	0.000440283	0.000779429	0.00061	0.00061	0.000666	0.000629	0.000635	0.000643	Reference proteins (WormBase)	0.000626589
MSTRG.6306.1	0.00020151	0.000145374	0.000173	0.000173	0.000164	0.00017	0.000169	0.000168	Novel proteoforms (BRAKER)	0.000170485
MSTRG.560.1	0.000636907	0.000518786	0.000578	0.000578	0.000558	0.000571	0.000569	0.000566	Novel proteoforms (BRAKER)	0.000571962
MSTRG.9190.1	0.00283784	0.00272801	0.002783	0.002783	0.002765	0.002777	0.002775	0.002772	Novel proteoforms (BRAKER)	0.00277761
MSTRG.12785.1	0.00134278	0.00124126	0.001292	0.001292	0.001275	0.001286	0.001285	0.001282	Novel proteoforms (BRAKER)	0.00128701
ACOC_0001291001-mRNA-1	0.000582254	0.000476488	0.000529	0.000529	0.000512	0.000523	0.000522	0.000519	Reference proteins (WormBase)	0.000524093
MSTRG.9671.1	0.000186492	0.00014987	0.000168	0.000168	0.000162	0.000166	0.000165	0.000165	Novel proteoforms (BRAKER)	0.000166295
MSTRG.1839.1	0.0010634	0.00116974	0.001117	0.001117	0.001134	0.001122	0.001124	0.001127	Novel proteoforms (BRAKER)	0.00112177
ACOC_0000286301-mRNA-1	0.000282799	0.000375134	0.000329	0.000329	0.000344	0.000334	0.000336	0.000338	Reference proteins (WormBase)	0.000333492
MSTRG.2538.1	0.000531988	0.000340319	0.000436	0.000436	0.000404	0.000426	0.000422	0.000417	Proteins from merged genes (BRAKER)	0.000426663
MSTRG.9499.1	0.000117931	0.000117305	0.000118	0.000118	0.000118	0.000118	0.000118	0.000118	Novel proteoforms (BRAKER)	0.000117905
ACOC_0000183301-mRNA-1	0.000189016	0.000135936	0.000162	0.000162	0.000154	0.00016	0.000159	0.000157	Reference proteins (WormBase)	0.000159869
MSTRG.61.1	0.000719485	0.000529337	0.000624	0.000624	0.000593	0.000614	0.00061	0.000606	Novel proteoforms (BRAKER)	0.000614978
MSTRG.5473.1	0.000300584	0.000291006	0.000296	0.000296	0.000294	0.000295	0.000295	0.000295	Novel proteoforms (BRAKER)	0.000295324
MSTRG.9750.2	3e-05	3.84333e-05	3.4e-05	3.4e-05	3.6e-05	3.5e-05	3.5e-05	3.5e-05	Novel proteoforms (BRAKER)	3.46792e-05
ACOC_0000432701-mRNA-1	0.000610889	0.0005863	0.000599	0.000599	0.000594	0.000597	0.000597	0.000596	Reference proteins (WormBase)	0.000597399
ACOC_0000215701-mRNA-1	0.000535359	0.000593999	0.000565	0.000565	0.000574	0.000568	0.000569	0.00057	Reference proteins (WormBase)	0.000567545
MSTRG.3685.1	0.000345564	0.000307684	0.000327	0.000327	0.00032	0.000325	0.000324	0.000323	Novel proteoforms (BRAKER)	0.000324906
ACOC_0001178901-mRNA-1	0.000171597	0.000169671	0.000171	0.000171	0.00017	0.000171	0.00017	0.00017	Proteins from split genes (WormBase)	0.000170534
MSTRG.9654.2	5.59667e-05	3.80333e-05	4.7e-05	4.7e-05	4.4e-05	4.6e-05	4.6e-05	4.5e-05	Novel proteoforms (BRAKER)	4.6125e-05
MSTRG.8963.1	0.000500014	0.000393908	0.000447	0.000447	0.000429	0.000441	0.000439	0.000436	Novel proteoforms (BRAKER)	0.000441615
ACOC_0001256001-mRNA-1	0.000432614	0.000415025	0.000424	0.000424	0.000421	0.000423	0.000423	0.000422	Reference proteins (WormBase)	0.00042308
ACOC_0000408401-mRNA-1	0.00437497	0.00267892	0.003527	0.003527	0.003244	0.003433	0.003401	0.003359	Reference proteins (WormBase)	0.00344311
MSTRG.7657.1	0.000556728	0.000408646	0.000483	0.000483	0.000458	0.000474	0.000472	0.000468	Novel proteoforms (BRAKER)	0.000475422
MSTRG.9468.1	0.000260954	0.00045337	0.000357	0.000357	0.000389	0.000368	0.000371	0.000376	Novel proteoforms (BRAKER)	0.00036654
MSTRG.7029.1	0.000337856	0.000327602	0.000333	0.000333	0.000331	0.000332	0.000332	0.000332	Novel proteoforms (BRAKER)	0.000332307
ACOC_0000385101-mRNA-1	0.000145446	0.000133341	0.000139	0.000139	0.000137	0.000139	0.000138	0.000138	Reference proteoforms (WormBase)	0.000138598
ACOC_0000728101-mRNA-1	0.00167381	0.00196026	0.001817	0.001817	0.001865	0.001833	0.001838	0.001845	Reference proteins (WormBase)	0.00183113
MSTRG.8185.1	9.80797e-05	9.99477e-05	9.9e-05	9.9e-05	9.9e-05	9.9e-05	9.9e-05	9.9e-05	Novel proteoforms (BRAKER)	9.90034e-05
MSTRG.12191.1	0.000219598	0.000239254	0.000229	0.000229	0.000233	0.000231	0.000231	0.000231	Novel proteoforms (BRAKER)	0.000230357
MSTRG.5809.1	0.00104927	0.00151883	0.001284	0.001284	0.001362	0.00131	0.001319	0.00133	Novel proteoforms (BRAKER)	0.00130714
ACOC_0000008801-mRNA-1	0.00112237	0.0012636	0.001193	0.001193	0.001217	0.001201	0.001203	0.001207	Reference proteins (WormBase)	0.0012
ACOC_0000515301-mRNA-1	0.000528534	0.000592559	0.000561	0.000561	0.000571	0.000564	0.000565	0.000567	Reference proteins (WormBase)	0.000563762
MSTRG.10112.1	5.15e-05	5.83667e-05	5.5e-05	5.5e-05	5.6e-05	5.5e-05	5.5e-05	5.6e-05	Novel proteoforms (BRAKER)	5.52333e-05
ACOC_0001282101-mRNA-1	0.0025708	0.00183837	0.002205	0.002205	0.002083	0.002164	0.00215	0.002132	Reference proteins (WormBase)	0.00216852
MSTRG.7156.1	1.85333e-05	2.2e-05	2e-05	2e-05	2.1e-05	2e-05	2.1e-05	2.1e-05	Novel proteoforms (BRAKER)	2.04417e-05
MSTRG.11972.1	0.00116489	0.00121632	0.001191	0.001191	0.001199	0.001193	0.001194	0.001196	Novel proteoforms (BRAKER)	0.00119315
MSTRG.52.1	0.000285049	0.0002408	0.000263	0.000263	0.000256	0.00026	0.00026	0.000259	Novel proteoforms (BRAKER)	0.000260856
MSTRG.8555.1	0.000571088	0.000458215	0.000515	0.000515	0.000496	0.000508	0.000506	0.000504	Novel proteoforms (BRAKER)	0.000509163
MSTRG.6413.2	0.000562066	0.00064395	0.000603	0.000603	0.000617	0.000608	0.000609	0.000611	Novel proteoforms (BRAKER)	0.000607127
MSTRG.7572.1	7.78813e-05	5.99667e-05	6.9e-05	6.9e-05	6.6e-05	6.8e-05	6.8e-05	6.7e-05	Novel proteoforms (BRAKER)	6.8106e-05
ACOC_0000590601-mRNA-1	0.000121887	3.30667e-05	7.7e-05	7.7e-05	6.3e-05	7.3e-05	7.1e-05	6.9e-05	Reference proteoforms (WormBase)	7.31192e-05
ACOC_0000506901-mRNA-1	9.75667e-06	6.21e-06	8e-06	8e-06	7e-06	8e-06	8e-06	8e-06	Reference proteins (WormBase)	7.87083e-06
MSTRG.6618.2	6.84333e-05	8.79157e-05	7.8e-05	7.8e-05	8.1e-05	7.9e-05	8e-05	8e-05	Novel proteoforms (BRAKER)	7.90436e-05
MSTRG.12394.2	8.66333e-05	0.000126413	0.000107	0.000107	0.000113	0.000109	0.000109	0.00011	Proteins from merged genes (BRAKER)	0.000108506
ACOC_0000417801-mRNA-1	0.000456171	0.000384068	0.00042	0.00042	0.000408	0.000416	0.000415	0.000413	Reference proteoforms (WormBase)	0.00041653
MSTRG.6010.1	0.000117857	0.000106513	0.000112	0.000112	0.00011	0.000112	0.000111	0.000111	Novel proteins (BRAKER)	0.000111546
ACOC_0000296401-mRNA-1	NA	NA	NA	NA	NA	NA	NA	NA	Reference proteoforms (WormBase)	#DIV/0!
ACOC_0001121801-mRNA-1	7.29e-05	8.09093e-05	7.7e-05	7.7e-05	7.8e-05	7.7e-05	7.7e-05	7.8e-05	Reference proteins (WormBase)	7.72262e-05
ACOC_0001023501-mRNA-1	0.000892124	0.000823542	0.000858	0.000858	0.000846	0.000854	0.000853	0.000851	Reference proteins (WormBase)	0.000854458
MSTRG.10143.1	0.000204722	0.000187066	0.000196	0.000196	0.000193	0.000195	0.000195	0.000194	Novel proteoforms (BRAKER)	0.000195099
MSTRG.1081.1	0.000267015	0.000257269	0.000262	0.000262	0.000261	0.000262	0.000261	0.000261	Novel proteoforms (BRAKER)	0.000261661
MSTRG.6771.1	6.58667e-06	6.07333e-06	6e-06	6e-06	6e-06	6e-06	6e-06	6e-06	Novel proteoforms (BRAKER)	6.0825e-06
MSTRG.7634.1	4.15667e-05	5.13667e-05	4.6e-05	4.6e-05	4.8e-05	4.7e-05	4.7e-05	4.7e-05	Proteins from merged genes (BRAKER)	4.67417e-05
MSTRG.9063.1	1.553e-05	3.965e-05	2.8e-05	2.8e-05	3.2e-05	2.9e-05	2.9e-05	3e-05	Novel proteoforms (BRAKER)	2.88975e-05
MSTRG.2836.2	6.27333e-06	9.24333e-06	8e-06	8e-06	8e-06	8e-06	8e-06	8e-06	Novel proteoforms (BRAKER)	7.93958e-06
MSTRG.288.2	4.52333e-05	4.35333e-05	4.4e-05	4.4e-05	4.4e-05	4.4e-05	4.4e-05	4.4e-05	Novel proteoforms (BRAKER)	4.40958e-05
MSTRG.348.1	3.7e-05	4.59667e-05	4.1e-05	4.1e-05	4.3e-05	4.2e-05	4.2e-05	4.2e-05	Novel proteoforms (BRAKER)	4.17458e-05
ACOC_0001276401-mRNA-1	1.66e-05	2.21e-05	1.9e-05	1.9e-05	2e-05	2e-05	2e-05	2e-05	Reference proteoforms (WormBase)	1.95875e-05
ACOC_0000836401-mRNA-1	0.000377655	0.000297131	0.000337	0.000337	0.000324	0.000333	0.000331	0.000329	Reference proteins (WormBase)	0.000333223
MSTRG.7633.1	1.123e-05	1.86967e-05	1.5e-05	1.5e-05	1.6e-05	1.5e-05	1.6e-05	1.6e-05	Proteins from merged genes (BRAKER)	1.53658e-05
MSTRG.5110.1	0.000144305	0.000149865	0.000147	0.000147	0.000148	0.000147	0.000147	0.000148	Novel proteoforms (BRAKER)	0.000147271
MSTRG.3563.1	4.00667e-06	1.835e-06	3e-06	3e-06	3e-06	3e-06	3e-06	3e-06	Novel proteoforms (BRAKER)	2.98021e-06
ACOC_0000485101-mRNA-1	0.000130929	9.15625e-05	0.000111	0.000111	0.000105	0.000109	0.000108	0.000107	Reference proteins (WormBase)	0.000109186
MSTRG.9653.1	0.000163633	0.000178361	0.000171	0.000171	0.000173	0.000172	0.000172	0.000172	Novel proteoforms (BRAKER)	0.000171624
MSTRG.9199.1	NA	NA	NA	NA	NA	NA	NA	NA	Novel proteoforms (BRAKER)	#DIV/0!
MSTRG.12203.1	NA	NA	NA	NA	NA	NA	NA	NA	Novel proteoforms (BRAKER)	#DIV/0!
MSTRG.8326.2	NA	NA	NA	NA	NA	NA	NA	NA	Novel proteoforms (BRAKER)	#DIV/0!
MSTRG.216.1	0.000258072	0.000203063	0.000231	0.000231	0.000221	0.000228	0.000226	0.000225	Novel proteoforms (BRAKER)	0.000227892
MSTRG.7295.1	4.69e-06	2.8e-05	1.6e-05	1.6e-05	2e-05	1.8e-05	1.8e-05	1.9e-05	Novel proteoforms (BRAKER)	1.74612e-05
MSTRG.4073.1	6.015e-05	NA	NA	NA	NA	NA	NA	NA	Novel proteins (BRAKER)	6.015e-05
MSTRG.11139.2	NA	NA	NA	NA	NA	NA	NA	NA	Novel proteoforms (BRAKER)	#DIV/0!
MSTRG.11279.1	5.6868e-05	NA	NA	NA	NA	NA	NA	NA	Novel proteoforms (BRAKER)	5.6868e-05
MSTRG.4861.2	NA	7.24e-06	NA	NA	NA	NA	NA	NA	Novel proteoforms (BRAKER)	7.24e-06
MSTRG.8274.1	NA	NA	NA	NA	NA	NA	NA	NA	Novel proteoforms (BRAKER)	#DIV/0!
MSTRG.2014.1	3.354e-06	1.4e-06	2e-06	2e-06	2e-06	2e-06	2e-06	2e-06	Novel proteoforms (BRAKER)	2.09425e-06
MSTRG.10531.2	NA	1.29e-05	NA	NA	NA	NA	NA	NA	Novel proteoforms (BRAKER)	1.29e-05
ACOC_0000292101-mRNA-1	NA	NA	NA	NA	NA	NA	NA	NA	Reference proteoforms (WormBase)	#DIV/0!
ACOC_0001252201-mRNA-1	2.66e-06	NA	NA	NA	NA	NA	NA	NA	Reference proteoforms (WormBase)	2.66e-06
MSTRG.6423.1	NA	4.25e-05	NA	NA	NA	NA	NA	NA	Novel proteoforms (BRAKER)	4.25e-05
MSTRG.10566.1	NA	NA	NA	NA	NA	NA	NA	NA	Novel proteoforms (BRAKER)	#DIV/0!
MSTRG.69.1	NA	NA	NA	NA	NA	NA	NA	NA	Novel proteoforms (BRAKER)	#DIV/0!
MSTRG.4971.1	2.16e-06	1.79333e-06	2e-06	2e-06	2e-06	2e-06	2e-06	2e-06	Novel proteoforms (BRAKER)	1.99417e-06
MSTRG.1925.1	NA	3.61e-06	NA	NA	NA	NA	NA	NA	Novel proteoforms (BRAKER)	3.61e-06
MSTRG.6371.2	NA	5.57e-05	NA	NA	NA	NA	NA	NA	Novel proteoforms (BRAKER)	5.57e-05
MSTRG.11471.1	0.000139287	2.525e-06	7.1e-05	7.1e-05	4.8e-05	6.3e-05	6.1e-05	5.7e-05	Novel proteoforms (BRAKER)	6.41015e-05
MSTRG.12280.1	NA	NA	NA	NA	NA	NA	NA	NA	Novel proteoforms (BRAKER)	#DIV/0!
MSTRG.1363.2	NA	NA	NA	NA	NA	NA	NA	NA	Novel proteoforms (BRAKER)	#DIV/0!
MSTRG.10490.4	1.65e-05	NA	NA	NA	NA	NA	NA	NA	Proteins from merged genes (BRAKER)	1.65e-05
MSTRG.5062.1	NA	NA	NA	NA	NA	NA	NA	NA	Novel proteoforms (BRAKER)	#DIV/0!
MSTRG.9315.1	NA	NA	NA	NA	NA	NA	NA	NA	Novel proteoforms (BRAKER)	#DIV/0!
MSTRG.1986.4	2.12e-05	NA	NA	NA	NA	NA	NA	NA	Novel proteoforms (BRAKER)	2.12e-05
MSTRG.6876.1	NA	2.73e-05	NA	NA	NA	NA	NA	NA	Novel proteoforms (BRAKER)	2.73e-05
MSTRG.4524.1	3.52e-05	NA	NA	NA	NA	NA	NA	NA	Novel proteoforms (BRAKER)	3.52e-05
MSTRG.2425.5	NA	NA	NA	NA	NA	NA	NA	NA	Proteins from merged genes (BRAKER)	#DIV/0!
MSTRG.10755.1	NA	NA	NA	NA	NA	NA	NA	NA	Novel proteoforms (BRAKER)	#DIV/0!
MSTRG.4228.1	NA	NA	NA	NA	NA	NA	NA	NA	Novel proteoforms (BRAKER)	#DIV/0!
ACOC_0001211401-mRNA-1	5.68e-05	5.165e-05	5.4e-05	5.4e-05	5.3e-05	5.4e-05	5.4e-05	5.4e-05	Reference proteins (WormBase)	5.39313e-05
ACOC_0000825401-mRNA-1	NA	3.96333e-05	NA	NA	NA	NA	NA	NA	Reference proteins (WormBase)	3.96333e-05
ACOC_0000347901-mRNA-1	NA	NA	NA	NA	NA	NA	NA	NA	Reference proteins (WormBase)	#DIV/0!
ACOC_0000937901-mRNA-1	NA	NA	NA	NA	NA	NA	NA	NA	Reference proteoforms (WormBase)	#DIV/0!
MSTRG.9168.1	NA	NA	NA	NA	NA	NA	NA	NA	Novel proteoforms (BRAKER)	#DIV/0!
ACOC_0000259301-mRNA-1	NA	NA	NA	NA	NA	NA	NA	NA	Proteins from split genes (WormBase)	#DIV/0!
ACOC_0001040201-mRNA-1	1.0609e-05	NA	NA	NA	NA	NA	NA	NA	Reference proteoforms (WormBase)	1.0609e-05
ACOC_0000025901-mRNA-1	NA	NA	NA	NA	NA	NA	NA	NA	Proteins from split genes (WormBase)	#DIV/0!
MSTRG.9366.1	1.23e-05	3.95e-05	2.6e-05	2.6e-05	3e-05	2.7e-05	2.8e-05	2.9e-05	Novel proteoforms (BRAKER)	2.7225e-05
MSTRG.8343.1	2.9e-05	NA	NA	NA	NA	NA	NA	NA	Novel proteoforms (BRAKER)	2.9e-05
MSTRG.8848.1	NA	NA	NA	NA	NA	NA	NA	NA	Novel proteoforms (BRAKER)	#DIV/0!
MSTRG.1278.1	NA	NA	NA	NA	NA	NA	NA	NA	Novel proteins (BRAKER)	#DIV/0!
MSTRG.10434.1	NA	NA	NA	NA	NA	NA	NA	NA	Novel proteoforms (BRAKER)	#DIV/0!
MSTRG.6014.1	NA	NA	NA	NA	NA	NA	NA	NA	Novel proteoforms (BRAKER)	#DIV/0!
MSTRG.4766.1	2.42e-05	NA	NA	NA	NA	NA	NA	NA	Novel proteins (BRAKER)	2.42e-05
MSTRG.8722.1	NA	3.94e-07	NA	NA	NA	NA	NA	NA	Proteins from merged genes (BRAKER)	3.94e-07
MSTRG.761.1	NA	5.59e-06	NA	NA	NA	NA	NA	NA	Novel proteoforms (BRAKER)	5.59e-06
MSTRG.8469.1	4.22e-06	4.67e-06	4e-06	4e-06	5e-06	4e-06	4e-06	4e-06	Novel proteoforms (BRAKER)	4.23625e-06
MSTRG.9415.1	NA	NA	NA	NA	NA	NA	NA	NA	Novel proteoforms (BRAKER)	#DIV/0!
MSTRG.330.3	2.99e-06	NA	NA	NA	NA	NA	NA	NA	Novel proteoforms (BRAKER)	2.99e-06
MSTRG.6365.1	NA	NA	NA	NA	NA	NA	NA	NA	Novel proteoforms (BRAKER)	#DIV/0!
MSTRG.4032.1	NA	3.02e-05	NA	NA	NA	NA	NA	NA	Novel proteoforms (BRAKER)	3.02e-05
MSTRG.2284.1	NA	NA	NA	NA	NA	NA	NA	NA	Novel proteins (BRAKER)	#DIV/0!
MSTRG.3422.1	NA	NA	NA	NA	NA	NA	NA	NA	Novel proteoforms (BRAKER)	#DIV/0!
MSTRG.7530.1	5.45e-06	2e-05	1.3e-05	1.3e-05	1.5e-05	1.4e-05	1.4e-05	1.4e-05	Novel proteoforms (BRAKER)	1.35563e-05
MSTRG.9575.2	NA	NA	NA	NA	NA	NA	NA	NA	Novel proteoforms (BRAKER)	#DIV/0!
ACOC_0000463201-mRNA-1	NA	4.95e-06	NA	NA	NA	NA	NA	NA	Reference proteins (WormBase)	4.95e-06
MSTRG.5155.1	3.63e-06	NA	NA	NA	NA	NA	NA	NA	Novel proteoforms (BRAKER)	3.63e-06
MSTRG.8532.1	3.76e-06	3.99667e-06	4e-06	4e-06	4e-06	4e-06	4e-06	4e-06	Proteins from merged genes (BRAKER)	3.96958e-06
MSTRG.6194.1	3.64e-07	8.015e-07	1e-06	1e-06	1e-06	1e-06	1e-06	1e-06	Proteins from merged genes (BRAKER)	8.95687e-07
MSTRG.5353.1	NA	3.125e-05	NA	NA	NA	NA	NA	NA	Novel proteoforms (BRAKER)	3.125e-05
MSTRG.8656.1	NA	1.95e-05	NA	NA	NA	NA	NA	NA	Novel proteins (BRAKER)	1.95e-05
MSTRG.7486.1	NA	NA	NA	NA	NA	NA	NA	NA	Proteins from merged genes (BRAKER)	#DIV/0!
MSTRG.7500.1	NA	NA	NA	NA	NA	NA	NA	NA	Novel proteoforms (BRAKER)	#DIV/0!
MSTRG.11786.1	NA	NA	NA	NA	NA	NA	NA	NA	Novel proteoforms (BRAKER)	#DIV/0!
MSTRG.7982.1	NA	NA	NA	NA	NA	NA	NA	NA	Proteins from merged genes (BRAKER)	#DIV/0!
ACOC_0001333301-mRNA-1	NA	NA	NA	NA	NA	NA	NA	NA	Reference proteoforms (WormBase)	#DIV/0!
ACOC_0000289701-mRNA-1	NA	NA	NA	NA	NA	NA	NA	NA	Reference proteoforms (WormBase)	#DIV/0!
MSTRG.8648.1	NA	NA	NA	NA	NA	NA	NA	NA	Novel proteoforms (BRAKER)	#DIV/0!
MSTRG.6667.3	6.01e-06	NA	NA	NA	NA	NA	NA	NA	Novel proteoforms (BRAKER)	6.01e-06
MSTRG.11880.2	NA	3.93e-05	NA	NA	NA	NA	NA	NA	Novel proteoforms (BRAKER)	3.93e-05
MSTRG.4534.1	NA	NA	NA	NA	NA	NA	NA	NA	Novel proteoforms (BRAKER)	#DIV/0!
MSTRG.4627.1	NA	NA	NA	NA	NA	NA	NA	NA	Novel proteoforms (BRAKER)	#DIV/0!
MSTRG.6009.1	NA	NA	NA	NA	NA	NA	NA	NA	Novel proteoforms (BRAKER)	#DIV/0!
MSTRG.5271.1	NA	NA	NA	NA	NA	NA	NA	NA	Novel proteoforms (BRAKER)	#DIV/0!
MSTRG.7422.1	NA	1.22e-06	NA	NA	NA	NA	NA	NA	Novel proteoforms (BRAKER)	1.22e-06
MSTRG.2979.1	NA	2.03e-05	NA	NA	NA	NA	NA	NA	Novel proteins (BRAKER)	2.03e-05
ACOC_0000414601-mRNA-1	NA	NA	NA	NA	NA	NA	NA	NA	Reference proteins (WormBase)	#DIV/0!
MSTRG.1598.2	NA	1.1025e-05	NA	NA	NA	NA	NA	NA	Novel proteoforms (BRAKER)	1.1025e-05
MSTRG.1585.1	NA	NA	NA	NA	NA	NA	NA	NA	Novel proteoforms (BRAKER)	#DIV/0!
MSTRG.1562.1	NA	NA	NA	NA	NA	NA	NA	NA	Novel proteoforms (BRAKER)	#DIV/0!
MSTRG.10422.1	NA	1.53e-05	NA	NA	NA	NA	NA	NA	Novel proteoforms (BRAKER)	1.53e-05
ACOC_0001108101-mRNA-1	NA	1.15e-06	NA	NA	NA	NA	NA	NA	Reference proteoforms (WormBase)	1.15e-06
ACOC_0000347601-mRNA-1	NA	0.000585029	NA	NA	NA	NA	NA	NA	Proteins from split genes (WormBase)	0.000585029
MSTRG.11291.1	NA	8.855e-06	NA	NA	NA	NA	NA	NA	Novel proteoforms (BRAKER)	8.855e-06
MSTRG.9070.1	NA	1.21467e-05	NA	NA	NA	NA	NA	NA	Novel proteoforms (BRAKER)	1.21467e-05
MSTRG.512.1	NA	NA	NA	NA	NA	NA	NA	NA	Novel proteoforms (BRAKER)	#DIV/0!
MSTRG.8618.3	NA	NA	NA	NA	NA	NA	NA	NA	Novel proteoforms (BRAKER)	#DIV/0!
MSTRG.6789.1	NA	NA	NA	NA	NA	NA	NA	NA	Novel proteoforms (BRAKER)	#DIV/0!
MSTRG.4348.1	NA	2.21e-06	NA	NA	NA	NA	NA	NA	Novel proteoforms (BRAKER)	2.21e-06
ACOC_0000296901-mRNA-1	NA	0.000204562	NA	NA	NA	NA	NA	NA	Reference proteoforms (WormBase)	0.000204562
MSTRG.12178.1	NA	NA	NA	NA	NA	NA	NA	NA	Novel proteoforms (BRAKER)	#DIV/0!
MSTRG.9691.1	NA	NA	NA	NA	NA	NA	NA	NA	Novel proteoforms (BRAKER)	#DIV/0!
ACOC_0000598201-mRNA-1	NA	NA	NA	NA	NA	NA	NA	NA	Reference proteoforms (WormBase)	#DIV/0!
MSTRG.5179.1	NA	NA	NA	NA	NA	NA	NA	NA	Novel proteoforms (BRAKER)	#DIV/0!
MSTRG.7751.1	NA	NA	NA	NA	NA	NA	NA	NA	Novel proteoforms (BRAKER)	#DIV/0!
MSTRG.4995.1	NA	NA	NA	NA	NA	NA	NA	NA	Proteins from merged genes (BRAKER)	#DIV/0!
ACOC_0000319601-mRNA-1	NA	1.18e-05	NA	NA	NA	NA	NA	NA	Reference proteoforms (WormBase)	1.18e-05
MSTRG.5169.2	NA	9.42e-07	NA	NA	NA	NA	NA	NA	Novel proteoforms (BRAKER)	9.42e-07
ACOC_0001089701-mRNA-1	NA	0.000200782	NA	NA	NA	NA	NA	NA	Reference proteins (WormBase)	0.000200782
MSTRG.11000.1	NA	6.69e-06	NA	NA	NA	NA	NA	NA	Proteins from merged genes (BRAKER)	6.69e-06
MSTRG.4368.1	NA	2.585e-06	NA	NA	NA	NA	NA	NA	Novel proteoforms (BRAKER)	2.585e-06
ACOC_0001149401-mRNA-1	NA	NA	NA	NA	NA	NA	NA	NA	Reference proteoforms (WormBase)	#DIV/0!
MSTRG.6020.1	NA	NA	NA	NA	NA	NA	NA	NA	Novel proteoforms (BRAKER)	#DIV/0!
MSTRG.1174.1	NA	NA	NA	NA	NA	NA	NA	NA	Novel proteoforms (BRAKER)	#DIV/0!
MSTRG.9463.1	NA	0.000139074	NA	NA	NA	NA	NA	NA	Novel proteoforms (BRAKER)	0.000139074
ACOC_0000107201-mRNA-1	NA	1.77e-06	NA	NA	NA	NA	NA	NA	Proteins from split genes (WormBase)	1.77e-06
ACOC_0000411001-mRNA-1	NA	NA	NA	NA	NA	NA	NA	NA	Reference proteins (WormBase)	#DIV/0!
ACOC_0000057401-mRNA-1	NA	2.12e-06	NA	NA	NA	NA	NA	NA	Reference proteoforms (WormBase)	2.12e-06
MSTRG.4746.1	NA	NA	NA	NA	NA	NA	NA	NA	Proteins from merged genes (BRAKER)	#DIV/0!
MSTRG.7849.1	NA	NA	NA	NA	NA	NA	NA	NA	Novel proteoforms (BRAKER)	#DIV/0!
MSTRG.10314.1	NA	NA	NA	NA	NA	NA	NA	NA	Novel proteoforms (BRAKER)	#DIV/0!
MSTRG.10672.1	NA	8.93e-05	NA	NA	NA	NA	NA	NA	Proteins from merged genes (BRAKER)	8.93e-05
MSTRG.6202.1	NA	2.15e-05	NA	NA	NA	NA	NA	NA	Novel proteoforms (BRAKER)	2.15e-05
ACOC_0001281701-mRNA-1	NA	7.09e-06	NA	NA	NA	NA	NA	NA	Reference proteoforms (WormBase)	7.09e-06
MSTRG.7396.1	NA	NA	NA	NA	NA	NA	NA	NA	Proteins from merged genes (BRAKER)	#DIV/0!
MSTRG.6598.1	NA	NA	NA	NA	NA	NA	NA	NA	Novel proteoforms (BRAKER)	#DIV/0!
ACOC_0000967401-mRNA-1	NA	NA	NA	NA	NA	NA	NA	NA	Reference proteins (WormBase)	#DIV/0!
MSTRG.2256.1	NA	3.88e-06	NA	NA	NA	NA	NA	NA	Novel proteoforms (BRAKER)	3.88e-06
MSTRG.3070.1	NA	NA	NA	NA	NA	NA	NA	NA	Novel proteoforms (BRAKER)	#DIV/0!
ACOC_0000872101-mRNA-1	NA	NA	NA	NA	NA	NA	NA	NA	Reference proteoforms (WormBase)	#DIV/0!
MSTRG.8272.1	NA	NA	NA	NA	NA	NA	NA	NA	Proteins from merged genes (BRAKER)	#DIV/0!
MSTRG.280.2	NA	NA	NA	NA	NA	NA	NA	NA	Proteins from merged genes (BRAKER)	#DIV/0!
MSTRG.10345.1	NA	NA	NA	NA	NA	NA	NA	NA	Novel proteoforms (BRAKER)	#DIV/0!
MSTRG.7454.1	NA	4.12e-06	NA	NA	NA	NA	NA	NA	Novel proteoforms (BRAKER)	4.12e-06
MSTRG.4826.1	NA	NA	NA	NA	NA	NA	NA	NA	Novel proteoforms (BRAKER)	#DIV/0!
ACOC_0000101401-mRNA-1	NA	8.52e-06	NA	NA	NA	NA	NA	NA	Reference proteins (WormBase)	8.52e-06
ACOC_0000617401-mRNA-1	NA	2.4965e-05	NA	NA	NA	NA	NA	NA	Reference proteoforms (WormBase)	2.4965e-05
ACOC_0000491801-mRNA-1	NA	1.062e-05	NA	NA	NA	NA	NA	NA	Reference proteins (WormBase)	1.062e-05
MSTRG.1539.1	NA	NA	NA	NA	NA	NA	NA	NA	Proteins from merged genes (BRAKER)	#DIV/0!
MSTRG.9781.1	NA	0.000277008	NA	NA	NA	NA	NA	NA	Novel proteins (BRAKER)	0.000277008
ACOC_0000243701-mRNA-1	NA	2.7e-06	NA	NA	NA	NA	NA	NA	Reference proteoforms (WormBase)	2.7e-06
MSTRG.1807.1	NA	3.71e-06	NA	NA	NA	NA	NA	NA	Novel proteoforms (BRAKER)	3.71e-06
MSTRG.7479.5	NA	1.29e-05	NA	NA	NA	NA	NA	NA	Proteins from merged genes (BRAKER)	1.29e-05
MSTRG.7174.1	NA	NA	NA	NA	NA	NA	NA	NA	Novel proteoforms (BRAKER)	#DIV/0!
MSTRG.9423.1	NA	NA	NA	NA	NA	NA	NA	NA	Novel proteoforms (BRAKER)	#DIV/0!
MSTRG.6098.1	NA	NA	NA	NA	NA	NA	NA	NA	Novel proteoforms (BRAKER)	#DIV/0!
MSTRG.10327.2	NA	NA	NA	NA	NA	NA	NA	NA	Novel proteoforms (BRAKER)	#DIV/0!
MSTRG.8139.1	NA	7.42e-06	NA	NA	NA	NA	NA	NA	Novel proteoforms (BRAKER)	7.42e-06
MSTRG.1473.1	NA	NA	NA	NA	NA	NA	NA	NA	Novel proteoforms (BRAKER)	#DIV/0!
ACOC_0000449101-mRNA-1	NA	NA	NA	NA	NA	NA	NA	NA	Reference proteins (WormBase)	#DIV/0!
MSTRG.7141.1	NA	4.82e-06	NA	NA	NA	NA	NA	NA	Novel proteoforms (BRAKER)	4.82e-06
MSTRG.10095.1	NA	NA	NA	NA	NA	NA	NA	NA	Novel proteoforms (BRAKER)	#DIV/0!
MSTRG.4709.1	NA	NA	NA	NA	NA	NA	NA	NA	Novel proteoforms (BRAKER)	#DIV/0!
MSTRG.5723.1	NA	1.22e-05	NA	NA	NA	NA	NA	NA	Novel proteoforms (BRAKER)	1.22e-05
ACOC_0001185101-mRNA-1	NA	NA	NA	NA	NA	NA	NA	NA	Reference proteins (WormBase)	#DIV/0!
MSTRG.4350.1	NA	NA	NA	NA	NA	NA	NA	NA	Proteins from merged genes (BRAKER)	#DIV/0!
MSTRG.9977.1	NA	6.56e-06	NA	NA	NA	NA	NA	NA	Novel proteoforms (BRAKER)	6.56e-06
MSTRG.5479.1	NA	1.05e-05	NA	NA	NA	NA	NA	NA	Novel proteoforms (BRAKER)	1.05e-05
MSTRG.2431.1	NA	NA	NA	NA	NA	NA	NA	NA	Novel proteoforms (BRAKER)	#DIV/0!
MSTRG.8688.1	NA	NA	NA	NA	NA	NA	NA	NA	Novel proteoforms (BRAKER)	#DIV/0!
ACOC_0000825301-mRNA-1	NA	NA	NA	NA	NA	NA	NA	NA	Reference proteoforms (WormBase)	#DIV/0!
MSTRG.8255.1	NA	NA	NA	NA	NA	NA	NA	NA	Proteins from merged genes (BRAKER)	#DIV/0!
ACOC_0000838601-mRNA-1	NA	NA	NA	NA	NA	NA	NA	NA	Reference proteoforms (WormBase)	#DIV/0!
ACOC_0000717901-mRNA-1	NA	2.86e-05	NA	NA	NA	NA	NA	NA	Reference proteoforms (WormBase)	2.86e-05
MSTRG.3326.1	NA	4.23e-05	NA	NA	NA	NA	NA	NA	Novel proteoforms (BRAKER)	4.23e-05
MSTRG.10316.1	NA	3.88e-07	NA	NA	NA	NA	NA	NA	Novel proteoforms (BRAKER)	3.88e-07
MSTRG.1440.1	NA	1.142e-05	NA	NA	NA	NA	NA	NA	Novel proteoforms (BRAKER)	1.142e-05
MSTRG.11884.1	NA	NA	NA	NA	NA	NA	NA	NA	Novel proteoforms (BRAKER)	#DIV/0!
ACOC_0000124601-mRNA-1	NA	NA	NA	NA	NA	NA	NA	NA	Reference proteins (WormBase)	#DIV/0!
MSTRG.2611.1	NA	NA	NA	NA	NA	NA	NA	NA	Proteins from merged genes (BRAKER)	#DIV/0!
ACOC_0001160201-mRNA-1	NA	NA	NA	NA	NA	NA	NA	NA	Reference proteins (WormBase)	#DIV/0!
MSTRG.7868.1	NA	2.28e-05	NA	NA	NA	NA	NA	NA	Novel proteoforms (BRAKER)	2.28e-05
ACOC_0001295701-mRNA-1	NA	6.52e-06	NA	NA	NA	NA	NA	NA	Reference proteoforms (WormBase)	6.52e-06
MSTRG.10738.1	NA	NA	NA	NA	NA	NA	NA	NA	Proteins from merged genes (BRAKER)	#DIV/0!
MSTRG.9591.1	NA	2.89e-06	NA	NA	NA	NA	NA	NA	Novel proteoforms (BRAKER)	2.89e-06
ACOC_0000678101-mRNA-1	NA	NA	NA	NA	NA	NA	NA	NA	Reference proteins (WormBase)	#DIV/0!
ACOC_0000612801-mRNA-1	NA	5.24e-06	NA	NA	NA	NA	NA	NA	Reference proteins (WormBase)	5.24e-06
MSTRG.3554.1	NA	2.86e-06	NA	NA	NA	NA	NA	NA	Novel proteoforms (BRAKER)	2.86e-06
MSTRG.8074.3	NA	NA	NA	NA	NA	NA	NA	NA	Proteins from merged genes (BRAKER)	#DIV/0!
MSTRG.10869.1	NA	NA	NA	NA	NA	NA	NA	NA	Novel proteoforms (BRAKER)	#DIV/0!
MSTRG.9603.1	NA	5.07e-06	NA	NA	NA	NA	NA	NA	Novel proteoforms (BRAKER)	5.07e-06
MSTRG.431.1	NA	NA	NA	NA	NA	NA	NA	NA	Proteins from merged genes (BRAKER)	#DIV/0!
MSTRG.12132.1	NA	NA	NA	NA	NA	NA	NA	NA	Novel proteoforms (BRAKER)	#DIV/0!
ACOC_0001151401-mRNA-1	NA	NA	NA	NA	NA	NA	NA	NA	Proteins from split genes (WormBase)	#DIV/0!
MSTRG.7182.1	NA	NA	NA	NA	NA	NA	NA	NA	Novel proteoforms (BRAKER)	#DIV/0!
MSTRG.10703.1	NA	0.000153008	NA	NA	NA	NA	NA	NA	Novel proteins (BRAKER)	0.000153008
MSTRG.11480.1	NA	NA	NA	NA	NA	NA	NA	NA	Novel proteoforms (BRAKER)	#DIV/0!
ACOC_0000864601-mRNA-1	NA	1.9e-05	NA	NA	NA	NA	NA	NA	Proteins from split genes (WormBase)	1.9e-05
MSTRG.1517.1	NA	3.4e-05	NA	NA	NA	NA	NA	NA	Novel proteoforms (BRAKER)	3.4e-05
MSTRG.100.1	NA	NA	NA	NA	NA	NA	NA	NA	Novel proteoforms (BRAKER)	#DIV/0!
ACOC_0000338301-mRNA-1	NA	NA	NA	NA	NA	NA	NA	NA	Reference proteoforms (WormBase)	#DIV/0!
ACOC_0000980101-mRNA-1	NA	1.13e-05	NA	NA	NA	NA	NA	NA	Reference proteins (WormBase)	1.13e-05
MSTRG.4658.1	NA	NA	NA	NA	NA	NA	NA	NA	Novel proteoforms (BRAKER)	#DIV/0!
MSTRG.12595.1	NA	NA	NA	NA	NA	NA	NA	NA	Novel proteoforms (BRAKER)	#DIV/0!
MSTRG.12661.2	NA	NA	NA	NA	NA	NA	NA	NA	Novel proteoforms (BRAKER)	#DIV/0!
MSTRG.12618.1	NA	9.72e-06	NA	NA	NA	NA	NA	NA	Novel proteins (BRAKER)	9.72e-06
MSTRG.1662.1	NA	NA	NA	NA	NA	NA	NA	NA	Novel proteoforms (BRAKER)	#DIV/0!
ACOC_0000243901-mRNA-1	NA	5.57e-06	NA	NA	NA	NA	NA	NA	Reference proteins (WormBase)	5.57e-06
ACOC_0000025401-mRNA-1	NA	0.000230243	NA	NA	NA	NA	NA	NA	Proteins from split genes (WormBase)	0.000230243
MSTRG.7221.1	NA	NA	NA	NA	NA	NA	NA	NA	Novel proteoforms (BRAKER)	#DIV/0!
MSTRG.656.1	NA	NA	NA	NA	NA	NA	NA	NA	Novel proteoforms (BRAKER)	#DIV/0!
[truncated: 604 more rows]
