# Supplementary material for: Identification of Novel Genes and Proteoforms in Angiostrongylus costaricensis through a Proteogenomic Approach
Source: Pathogens. 2022 Oct 31;11(11):1273. doi: 10.3390/pathogens11111273 (PMC9694666; doi:10.3390/pathogens11111273)
Supplement: Supplementary file 1 [file pathogens-11-01273-s001.zip › Supplemental_Data_S13.xlsx]

## Sheet: Clusters
Supplemental Data S13. Mean FPKM and NIAF of each cluster
Transcript/Protein ID	Mean FPKM	Mean NIAF	Cluster
ACOC_0000026801-mRNA-1	9.21994	7.94167e-06	1
ACOC_0000046801-mRNA-1	3.5556	6.88583e-06	1
ACOC_0000160101-mRNA-1	6.32922	3.33375e-05	1
ACOC_0000208301-mRNA-1	9.89568	2.06708e-05	1
ACOC_0000243701-mRNA-1	3.17233	2.7e-06	1
ACOC_0000290201-mRNA-1	5.0123	2.09e-06	1
ACOC_0000324401-mRNA-1	1.87166	2.26063e-05	1
ACOC_0000370001-mRNA-1	7.80278	4.10667e-06	1
ACOC_0000491801-mRNA-1	9.35902	1.062e-05	1
ACOC_0000563901-mRNA-1	6.32298	8.12e-06	1
ACOC_0000612801-mRNA-1	5.36911	5.24e-06	1
ACOC_0000646501-mRNA-1	7.28614	2.94875e-05	1
ACOC_0000943201-mRNA-1	0.473177	9.48e-07	1
ACOC_0000980101-mRNA-1	8.7957	1.13e-05	1
ACOC_0001163601-mRNA-1	6.44428	6.875e-06	1
MSTRG.10123.1	2.31364	4.86e-06	1
MSTRG.10254.1	1.94833	9.03458e-06	1
MSTRG.10422.1	11.1693	1.53e-05	1
MSTRG.10509.1	2.96221	6.90458e-06	1
MSTRG.10531.2	2.80888	1.29e-05	1
MSTRG.10601.3	8.32484	1.48e-05	1
MSTRG.10973.1	5.20714	4.24958e-05	1
MSTRG.11025.1	5.12648	4.9825e-06	1
MSTRG.11502.1	3.3821	1.9975e-06	1
MSTRG.11880.2	5.3828	3.93e-05	1
MSTRG.12156.1	6.44421	7.35e-06	1
MSTRG.12231.1	8.38954	6.88333e-06	1
MSTRG.12482.1	4.29659	9.33375e-06	1
MSTRG.1264.2	3.81811	1.96288e-05	1
MSTRG.12774.1	11.3437	1.47e-05	1
MSTRG.1375.1	2.26819	2.00187e-05	1
MSTRG.1480.1	2.50995	5.01e-06	1
MSTRG.1531.1	10.4202	2.35921e-05	1
MSTRG.2116.1	11.471	9.37667e-06	1
MSTRG.2268.1	8.73743	2.2725e-05	1
MSTRG.2308.3	5.7654	6.89e-06	1
MSTRG.2787.4	0.969068	3.01625e-06	1
MSTRG.2836.2	1.88642	7.93958e-06	1
MSTRG.2981.1	4.32317	9.32792e-06	1
MSTRG.3036.1	4.60662	1.645e-05	1
MSTRG.354.1	5.8617	1.98896e-05	1
MSTRG.3695.1	5.75517	9.02292e-06	1
MSTRG.4404.1	4.56058	8.6e-06	1
MSTRG.4544.1	8.73194	2.37375e-05	1
MSTRG.4661.1	2.0476	1.33917e-05	1
MSTRG.4755.1	3.59527	9.43e-06	1
MSTRG.5694.1	6.59259	1.10731e-05	1
MSTRG.6164.1	2.41458	1.7525e-05	1
MSTRG.6182.1	4.0932	3.73e-05	1
MSTRG.6202.1	3.3034	2.15e-05	1
MSTRG.6327.1	7.28545	1.53137e-05	1
MSTRG.6705.1	4.52241	8.17667e-06	1
MSTRG.7142.1	3.35065	1.40096e-05	1
MSTRG.7153.1	11.1459	1.63e-05	1
MSTRG.7444.1	4.13991	7.45167e-06	1
MSTRG.7479.5	3.06833	1.29e-05	1
MSTRG.7858.1	5.62701	8.95375e-06	1
MSTRG.7981.1	10.3778	1.2315e-05	1
MSTRG.8112.1	1.89718	4.03312e-06	1
MSTRG.8139.1	8.53525	7.42e-06	1
MSTRG.8140.1	5.15372	2.05142e-05	1
MSTRG.8343.1	2.36385	2.9e-05	1
MSTRG.8469.1	3.66196	4.23625e-06	1
MSTRG.8691.1	2.6909	2.41e-05	1
MSTRG.8803.3	6.03448	1.08e-05	1
MSTRG.9080.1	6.08827	7.38667e-06	1
MSTRG.9185.1	4.88285	2.52e-06	1
MSTRG.9243.1	5.10739	1.50296e-05	1
MSTRG.9480.1	3.35098	1.49812e-05	1
MSTRG.9603.1	7.06653	5.07e-06	1
MSTRG.9824.1	8.23048	1.7375e-05	1
ACOC_0000189301-mRNA-1	3.33219	5.83e-05	2
ACOC_0000209901-mRNA-1	1.51981	2.35e-05	2
ACOC_0000249901-mRNA-1	0.889738	0.000405433	2
ACOC_0000256501-mRNA-1	1.18292	0.000150393	2
ACOC_0000305601-mRNA-1	3.26981	9.79227e-05	2
ACOC_0000312001-mRNA-1	1.61552	0.00115118	2
ACOC_0000347601-mRNA-1	1.70735	0.000585029	2
ACOC_0000403201-mRNA-1	0.203602	4.30917e-05	2
ACOC_0000455501-mRNA-1	3.7468	7.36102e-05	2
ACOC_0000582701-mRNA-1	3.09893	5.42583e-05	2
ACOC_0000623601-mRNA-1	2.65794	0.000111058	2
ACOC_0000825701-mRNA-1	0.517698	0.000109079	2
ACOC_0000927201-mRNA-1	3.18492	0.000149675	2
ACOC_0001047701-mRNA-1	2.56238	0.00043418	2
ACOC_0001237801-mRNA-1	1.45315	0.00043972	2
ACOC_0001237901-mRNA-1	0.150307	0.00129359	2
MSTRG.10112.1	2.80332	5.52333e-05	2
MSTRG.10199.3	2.10804	0.00025602	2
MSTRG.10548.1	0.24348	0.000165377	2
MSTRG.10696.1	0.534009	0.000191684	2
MSTRG.11358.1	3.13379	0.000131567	2
MSTRG.11578.1	1.63222	5.90042e-05	2
MSTRG.1190.1	2.67376	7.12389e-05	2
MSTRG.11933.1	3.0731	6.79524e-05	2
MSTRG.11944.1	0.565227	1.6e-05	2
MSTRG.12920.1	1.10286	6.125e-05	2
MSTRG.12923.1	2.67737	0.000116471	2
MSTRG.12994.1	0.0595648	0.000750566	2
MSTRG.1517.1	1.96651	3.4e-05	2
MSTRG.1796.2	1.85209	8.29102e-05	2
MSTRG.2147.1	1.75314	4.845e-05	2
MSTRG.2357.1	0.568114	3.27e-05	2
MSTRG.2795.1	3.61135	7.9561e-05	2
MSTRG.3109.1	2.33967	0.00012248	2
MSTRG.3914.1	1.25234	0.000175316	2
MSTRG.4042.1	0.881073	3.10875e-05	2
MSTRG.4073.1	0.030673	6.015e-05	2
MSTRG.4106.1	1.75595	2.3e-05	2
MSTRG.4563.2	2.05934	3.83438e-05	2
MSTRG.4622.4	3.8299	6.69167e-05	2
MSTRG.4766.1	1.12423	2.42e-05	2
MSTRG.4998.1	2.72541	0.000101092	2
MSTRG.5118.1	1.85028	3.38312e-05	2
MSTRG.5785.1	0.245748	9.83e-06	2
MSTRG.6196.1	1.47414	8.88292e-05	2
MSTRG.7006.1	0.659094	9.8e-05	2
MSTRG.7124.1	0.802	1.409e-05	2
MSTRG.7211.1	2.08749	0.000271985	2
MSTRG.7954.1	0.391805	8.14832e-05	2
MSTRG.7987.1	0.619505	0.00021706	2
MSTRG.8656.1	0.819118	1.95e-05	2
MSTRG.8904.1	1.50316	0.000102081	2
MSTRG.8904.3	1.85396	0.000121549	2
MSTRG.9070.1	0.482281	1.21467e-05	2
MSTRG.9463.1	0.47508	0.000139074	2
MSTRG.9781.1	0.974678	0.000277008	2
ACOC_0000057401-mRNA-1	14.7558	2.12e-06	3
ACOC_0000243901-mRNA-1	38.2572	5.57e-06	3
ACOC_0000361101-mRNA-1	22.5287	2.0175e-06	3
ACOC_0000375001-mRNA-1	11.2642	4.99375e-06	3
ACOC_0000380301-mRNA-1	19.9902	1.67e-06	3
ACOC_0000444201-mRNA-1	20.959	1.46e-06	3
ACOC_0000486701-mRNA-1	19.9061	5.22875e-06	3
ACOC_0000989901-mRNA-1	41.4045	3.03083e-06	3
ACOC_0001289901-mRNA-1	9.70117	3.94e-06	3
MSTRG.1006.1	8.29921	1.23e-06	3
MSTRG.10094.1	36.3406	4.01125e-06	3
MSTRG.10316.1	18.5635	3.88e-07	3
MSTRG.10467.1	20.6328	2.142e-06	3
MSTRG.10640.1	26.2458	6.0925e-06	3
MSTRG.1089.1	36.9159	4.53417e-06	3
MSTRG.11029.1	14.8373	4.38917e-06	3
MSTRG.11080.1	18.4953	1.09906e-06	3
MSTRG.11126.1	8.5081	1.35e-06	3
MSTRG.11131.1	42.8627	3.94042e-06	3
MSTRG.11135.1	16.9421	1.3825e-06	3
MSTRG.11242.1	20.9321	9.33e-07	3
MSTRG.11462.1	38.2177	4.71e-06	3
MSTRG.11501.2	34.3738	4.10875e-06	3
MSTRG.12631.1	13.4824	5.71e-06	3
MSTRG.1312.1	18.0151	1.94046e-06	3
MSTRG.1670.1	27.7533	7.81e-07	3
MSTRG.1763.1	45.6373	1.23e-06	3
MSTRG.1807.1	13.1525	3.71e-06	3
MSTRG.1941.1	18.5749	1.01539e-06	3
MSTRG.2014.1	38.4503	2.09425e-06	3
MSTRG.2065.2	33.9668	4.985e-06	3
MSTRG.2109.1	31.7913	3.93437e-06	3
MSTRG.2163.1	31.5582	3.87e-06	3
MSTRG.2237.1	13.6229	7.14e-06	3
MSTRG.2256.1	32.3595	3.88e-06	3
MSTRG.2294.1	38.0356	9.44e-07	3
MSTRG.2562.1	42.7843	3.76e-06	3
MSTRG.330.3	24.729	2.99e-06	3
MSTRG.3554.1	13.4863	2.86e-06	3
MSTRG.4265.1	40.1765	1.04919e-06	3
MSTRG.4286.1	29.1203	1.9e-06	3
MSTRG.4300.1	25.4613	5.98875e-06	3
MSTRG.4348.1	43.2193	2.21e-06	3
MSTRG.4672.1	41.8563	2.89758e-06	3
MSTRG.482.1	44.5105	3.06292e-06	3
MSTRG.491.1	12.5984	4.87625e-06	3
MSTRG.4971.1	33.3907	1.99417e-06	3
MSTRG.5116.1	48.8326	2.00562e-06	3
MSTRG.5772.1	21.4835	5.96375e-06	3
MSTRG.6051.1	13.4255	4.93e-06	3
MSTRG.6284.1	17.571	3.00125e-06	3
MSTRG.6381.1	38.5385	2.015e-06	3
MSTRG.654.1	34.7273	5.80312e-06	3
MSTRG.6601.1	31.3864	1.92375e-06	3
MSTRG.662.1	40.9837	3.11333e-06	3
MSTRG.6667.3	23.9873	6.01e-06	3
MSTRG.6828.1	11.6779	8.66e-07	3
MSTRG.6948.1	13.0584	1.99813e-06	3
MSTRG.7141.1	17.9368	4.82e-06	3
MSTRG.7152.1	33.2533	1.09275e-06	3
MSTRG.7315.1	24.7819	4.19e-06	3
MSTRG.7576.1	17.6579	2.59e-06	3
MSTRG.8443.1	30.3166	4.445e-06	3
MSTRG.8532.1	18.0339	3.96958e-06	3
MSTRG.8541.1	52.475	1.883e-06	3
MSTRG.8722.1	8.09946	3.94e-07	3
MSTRG.9004.1	17.2391	1.2e-06	3
MSTRG.9115.1	19.4603	3.18e-06	3
MSTRG.9180.1	32.062	2.08e-06	3
MSTRG.9191.1	14.1736	2.71e-06	3
MSTRG.9313.1	31.1206	4.17208e-06	3
MSTRG.9591.1	9.03858	2.89e-06	3
MSTRG.9614.1	19.0804	4.0975e-06	3
ACOC_0000000601-mRNA-1	29.7266	1.36075e-05	4
ACOC_0000027901-mRNA-1	28.0304	1.19392e-05	4
ACOC_0000087201-mRNA-1	53.8752	9.84125e-06	4
ACOC_0000098101-mRNA-1	29.8103	1.84e-05	4
ACOC_0000101401-mRNA-1	24.3413	8.52e-06	4
ACOC_0000103301-mRNA-1	51.4656	1.30563e-05	4
ACOC_0000203401-mRNA-1	27.8077	2.79e-05	4
ACOC_0000216801-mRNA-1	52.8086	1.26208e-05	4
ACOC_0000234501-mRNA-1	33.8425	1.07633e-05	4
ACOC_0000319601-mRNA-1	34.9831	1.18e-05	4
ACOC_0000349901-mRNA-1	31.3475	1.7125e-05	4
ACOC_0000362201-mRNA-1	16.8315	1.28779e-05	4
ACOC_0000445901-mRNA-1	12.3811	1.73e-05	4
ACOC_0000463601-mRNA-1	30.3771	7.79e-06	4
ACOC_0000506901-mRNA-1	12.5204	7.87083e-06	4
ACOC_0000537701-mRNA-1	22.9581	2.0501e-05	4
ACOC_0000548101-mRNA-1	15.4463	1.42775e-05	4
ACOC_0000569801-mRNA-1	26.0769	2.00437e-05	4
ACOC_0000601401-mRNA-1	12.5256	9.88e-06	4
ACOC_0000617401-mRNA-1	23.4602	2.4965e-05	4
ACOC_0000624501-mRNA-1	39.5935	9.7e-06	4
ACOC_0000645401-mRNA-1	15.6294	1.4105e-05	4
ACOC_0000646901-mRNA-1	39.2915	1.62542e-05	4
ACOC_0000666101-mRNA-1	29.4812	1.74438e-05	4
ACOC_0000701001-mRNA-1	16.9146	2.80833e-05	4
ACOC_0000717901-mRNA-1	26.7664	2.86e-05	4
ACOC_0000752401-mRNA-1	29.7447	2.62333e-05	4
ACOC_0000825401-mRNA-1	29.6128	3.96333e-05	4
ACOC_0000864601-mRNA-1	17.7885	1.9e-05	4
ACOC_0000918701-mRNA-1	63.4043	1.31354e-05	4
ACOC_0000958601-mRNA-1	25.6468	2.78525e-05	4
ACOC_0000989701-mRNA-1	57.1097	1.48437e-05	4
ACOC_0001020401-mRNA-1	19.811	2.92667e-05	4
ACOC_0001040201-mRNA-1	25.6826	1.0609e-05	4
ACOC_0001083401-mRNA-1	31.3881	2.66132e-05	4
ACOC_0001115501-mRNA-1	16.9805	1.60408e-05	4
ACOC_0001171401-mRNA-1	24.1416	2.72375e-05	4
ACOC_0001269701-mRNA-1	24.4587	2.7669e-05	4
ACOC_0001276401-mRNA-1	24.1659	1.95875e-05	4
MSTRG.10030.1	22.1531	2.11292e-05	4
MSTRG.10159.1	48.1356	9.29958e-06	4
MSTRG.10333.1	21.5556	8.03417e-06	4
MSTRG.1037.1	16.8603	2.7e-05	4
MSTRG.10447.1	26.2391	8.895e-06	4
MSTRG.10488.1	34.3196	1.83e-05	4
MSTRG.10490.4	27.7318	1.65e-05	4
MSTRG.10566.3	21.0282	3.68e-05	4
MSTRG.10600.1	42.7434	9.51e-06	4
MSTRG.10647.1	41.4599	1.26213e-05	4
MSTRG.10660.1	15.0068	2.91125e-05	4
MSTRG.10682.1	39.6955	7.06938e-06	4
MSTRG.10688.1	31.401	2.84438e-05	4
MSTRG.10751.1	14.6151	1.19004e-05	4
MSTRG.11000.1	43.9397	6.69e-06	4
MSTRG.11078.1	36.9356	1.00471e-05	4
MSTRG.11291.1	50.1925	8.855e-06	4
MSTRG.11571.1	26.3364	1.89519e-05	4
MSTRG.11575.1	18.7316	9.99209e-06	4
MSTRG.1167.1	47.2519	1.2775e-05	4
MSTRG.11742.1	54.7131	1.01213e-05	4
MSTRG.11815.1	27.3378	1.30875e-05	4
MSTRG.11898.1	38.9595	9.04084e-06	4
MSTRG.11955.1	15.0185	8.04083e-06	4
MSTRG.1196.3	26.739	2.40083e-05	4
MSTRG.12138.1	29.9404	2.4725e-05	4
MSTRG.12284.1	28.9364	1.78e-05	4
MSTRG.12420.1	41.4141	2.0425e-05	4
MSTRG.12577.4	44.6655	6.97188e-06	4
MSTRG.12596.2	57.6193	9.00708e-06	4
MSTRG.12618.1	30.8278	9.72e-06	4
MSTRG.12694.1	48.5638	1.98875e-05	4
MSTRG.1487.1	59.4645	1.43833e-05	4
MSTRG.1564.1	18.2646	1.21244e-05	4
MSTRG.1598.2	44.1724	1.1025e-05	4
MSTRG.1892.1	36.524	1.81e-05	4
MSTRG.1911.1	41.282	6.02271e-06	4
MSTRG.1986.4	21.2132	2.12e-05	4
MSTRG.2321.1	31.454	1.09463e-05	4
MSTRG.2629.1	55.141	1.20196e-05	4
MSTRG.2633.1	23.4918	3.335e-05	4
MSTRG.2651.1	13.2927	1.35975e-05	4
MSTRG.277.1	41.6424	1.73625e-05	4
MSTRG.2979.1	22.3114	2.03e-05	4
MSTRG.3058.1	44.2064	2.58e-05	4
MSTRG.3085.1	26.9505	2.49358e-05	4
MSTRG.3097.1	38.7855	1.85438e-05	4
MSTRG.352.1	21.279	3.075e-05	4
MSTRG.3572.1	44.2785	9.045e-06	4
MSTRG.432.1	40.9851	7.38042e-06	4
MSTRG.4392.1	21.2171	2.16125e-05	4
MSTRG.4429.1	17.402	1.58833e-05	4
MSTRG.4496.1	41.4924	1.16712e-05	4
MSTRG.4519.1	31.4207	1.064e-05	4
MSTRG.4593.1	19.0155	1.12e-05	4
MSTRG.4861.2	26.7382	7.24e-06	4
MSTRG.5022.1	22.8983	1.19502e-05	4
MSTRG.5094.1	59.6764	1.725e-05	4
MSTRG.5323.1	48.3191	1.81438e-05	4
MSTRG.5479.1	36.5696	1.05e-05	4
MSTRG.5511.1	16.0014	3.1375e-05	4
MSTRG.5519.1	58.3349	1.33833e-05	4
MSTRG.5550.2	35.6705	6.09e-06	4
MSTRG.5552.1	25.4379	1.02e-05	4
MSTRG.5623.1	26.6344	1.0115e-05	4
MSTRG.5628.1	19.152	6.97875e-06	4
MSTRG.5693.4	15.1494	1.49e-05	4
MSTRG.57.1	16.5679	2.05152e-05	4
MSTRG.5720.1	28.2034	2.36717e-05	4
MSTRG.5723.1	39.1759	1.22e-05	4
MSTRG.5746.1	32.3838	2.19875e-05	4
MSTRG.583.2	17.3798	1.55821e-05	4
MSTRG.5903.1	25.9538	3.21812e-05	4
MSTRG.5963.2	49.7227	8.45e-06	4
MSTRG.5980.1	42.6923	9.60666e-06	4
MSTRG.605.1	56.1606	9.83417e-06	4
MSTRG.6055.1	68.1678	1.42863e-05	4
MSTRG.6064.1	53.9477	1.20925e-05	4
MSTRG.6238.1	28.0651	2.64e-05	4
MSTRG.6489.1	20.9932	1.61312e-05	4
MSTRG.6587.1	26.8083	1.50842e-05	4
MSTRG.6696.1	32.337	2.16417e-05	4
MSTRG.6788.1	55.7179	1.46381e-05	4
MSTRG.685.1	35.2377	1.58321e-05	4
MSTRG.695.1	21.6903	2.85e-05	4
MSTRG.7156.1	48.9147	2.04417e-05	4
MSTRG.7198.1	33.6942	1.76e-05	4
MSTRG.72.2	17.8678	2.16e-05	4
MSTRG.7225.1	43.7972	2.38e-05	4
MSTRG.7295.1	55.2196	1.74613e-05	4
MSTRG.7309.1	16.9357	2.59563e-05	4
MSTRG.7476.1	34.2393	1.7375e-05	4
MSTRG.7523.1	22.8863	1.08031e-05	4
MSTRG.7530.1	12.4427	1.35562e-05	4
MSTRG.7568.1	53.6131	1.87058e-05	4
MSTRG.7664.1	30.1336	6.92e-06	4
MSTRG.7671.1	48.7952	1.43969e-05	4
MSTRG.783.1	27.0247	7.35e-06	4
MSTRG.7833.1	36.2477	9.1175e-06	4
MSTRG.7862.1	14.6087	1.59563e-05	4
MSTRG.7868.1	51.4031	2.28e-05	4
MSTRG.7876.1	28.4482	1.27e-05	4
MSTRG.7908.1	13.5805	7.92833e-06	4
MSTRG.805.1	59.899	1.00742e-05	4
MSTRG.8133.1	25.6409	2.55796e-05	4
MSTRG.8149.1	50.6087	1.84142e-05	4
MSTRG.8265.1	53.2728	1.33e-05	4
MSTRG.8267.1	24.1861	2.63917e-05	4
MSTRG.8294.1	43.4217	1.12864e-05	4
MSTRG.8400.1	37.1085	1.62e-05	4
MSTRG.8420.1	11.6875	2.46312e-05	4
MSTRG.8575.1	58.3517	1.0765e-05	4
MSTRG.8640.1	13.6634	2.116e-05	4
MSTRG.8783.1	14.7561	7.96125e-06	4
MSTRG.8813.1	25.258	2.31e-05	4
MSTRG.8826.1	22.9717	2.64792e-05	4
MSTRG.8922.1	36.9503	1.63937e-05	4
MSTRG.893.1	24.1025	3.5e-05	4
MSTRG.9063.1	25.4663	2.88975e-05	4
MSTRG.9081.1	18.9089	3.18708e-05	4
MSTRG.9197.1	23.7356	3.24292e-05	4
MSTRG.9353.1	11.0751	2.12e-05	4
MSTRG.9366.1	21.3957	2.7225e-05	4
MSTRG.9392.1	30.555	1.27e-05	4
MSTRG.9395.1	51.0917	1.0995e-05	4
MSTRG.9529.1	29.9896	1.6e-05	4
MSTRG.9604.1	40.1922	2.32375e-05	4
MSTRG.9708.2	11.7338	1.88912e-05	4
MSTRG.98.1	19.9759	7.87375e-06	4
MSTRG.9920.1	36.8457	1.59239e-05	4
MSTRG.998.1	51.647	1.09e-05	4
MSTRG.9984.1	19.5885	2.44e-05	4
ACOC_0000107201-mRNA-1	85.8294	1.77e-06	5
ACOC_0000296301-mRNA-1	55.9137	5.03125e-06	5
ACOC_0000325001-mRNA-1	92.3811	4.77e-06	5
ACOC_0000387301-mRNA-1	127.68	9.05667e-06	5
ACOC_0000463201-mRNA-1	48.7382	4.95e-06	5
ACOC_0000468201-mRNA-1	67.1298	1.01065e-05	5
ACOC_0000620301-mRNA-1	56.7939	4.39e-06	5
ACOC_0000750301-mRNA-1	61.5133	3.94292e-06	5
ACOC_0000808501-mRNA-1	73.1867	1.00269e-05	5
ACOC_0000830601-mRNA-1	95.7426	2.255e-06	5
ACOC_0001108101-mRNA-1	92.8715	1.15e-06	5
ACOC_0001133701-mRNA-1	138.285	5.38938e-06	5
ACOC_0001158401-mRNA-1	123.428	1.1925e-05	5
ACOC_0001252201-mRNA-1	80.677	2.66e-06	5
ACOC_0001264701-mRNA-1	73.3966	7.79042e-06	5
ACOC_0001281701-mRNA-1	90.4242	7.09e-06	5
ACOC_0001295701-mRNA-1	65.7	6.52e-06	5
MSTRG.10292.1	68.4566	7.93875e-06	5
MSTRG.10492.1	134.316	7.09187e-06	5
MSTRG.10558.1	76.6247	2.85875e-06	5
MSTRG.10646.1	140.729	9.20979e-06	5
MSTRG.1073.1	78.0421	4.63e-06	5
MSTRG.10794.1	743.571	8.95e-07	5
MSTRG.11060.1	98.6201	1.11e-05	5
MSTRG.11299.1	115.604	5.02029e-06	5
MSTRG.11787.1	72.75	4.88729e-06	5
MSTRG.11831.1	55.4562	5.38042e-06	5
MSTRG.12022.1	104.884	9.95584e-06	5
MSTRG.12024.1	85.6172	1.08e-05	5
MSTRG.12172.1	72.6186	1.22e-06	5
MSTRG.12291.1	83.9399	9.6e-06	5
MSTRG.12343.2	55.7423	2.91e-06	5
MSTRG.12519.1	117.2	6.61208e-06	5
MSTRG.1440.1	119.492	1.142e-05	5
MSTRG.1723.1	93.9326	4.05333e-06	5
MSTRG.1925.1	58.6023	3.61e-06	5
MSTRG.210.1	125.041	5.51e-07	5
MSTRG.2103.3	59.1856	3.09792e-06	5
MSTRG.2133.1	57.3886	1.46e-06	5
MSTRG.2281.2	601.879	6.21e-07	5
MSTRG.2408.1	115.086	1.33875e-05	5
MSTRG.2442.1	61.2819	6.49e-06	5
MSTRG.2568.1	81.1446	7.44166e-06	5
MSTRG.2695.2	76.8801	1.39696e-05	5
MSTRG.2898.1	102.338	7.05e-06	5
MSTRG.2945.1	133.664	1.06108e-05	5
MSTRG.311.1	77.0859	2.02625e-06	5
MSTRG.3563.1	75.9802	2.98021e-06	5
MSTRG.4282.1	268.268	3.89687e-06	5
MSTRG.434.1	53.2072	6.025e-06	5
MSTRG.4368.1	109.328	2.585e-06	5
MSTRG.439.1	125.057	3.545e-06	5
MSTRG.4396.1	52.8266	6.99e-06	5
MSTRG.4458.3	114.335	2.75238e-06	5
MSTRG.4531.1	228.642	4.04e-06	5
MSTRG.4759.1	81.2723	2.01e-06	5
MSTRG.4783.1	94.1559	7.22063e-06	5
MSTRG.4822.1	79.8321	5.96231e-06	5
MSTRG.488.1	72.7023	9.97583e-07	5
MSTRG.4921.5	113.655	7.62438e-06	5
MSTRG.4922.1	296.917	1.98437e-06	5
MSTRG.4943.1	129.377	7.32e-06	5
MSTRG.4988.1	76.4956	7.6725e-06	5
MSTRG.5092.1	56.589	5.195e-06	5
MSTRG.5155.1	50.2589	3.63e-06	5
MSTRG.5169.2	71.4595	9.42e-07	5
MSTRG.5211.1	173.376	9.09562e-06	5
MSTRG.5223.1	109.306	8.48e-06	5
MSTRG.5228.1	136.69	5.0375e-06	5
MSTRG.5471.1	74.2036	9.105e-06	5
MSTRG.5578.1	648.132	2.91667e-06	5
MSTRG.5689.1	124.394	5.35e-06	5
MSTRG.5726.1	92.9102	6.9375e-06	5
MSTRG.5823.2	80.7154	4.8525e-06	5
MSTRG.5866.1	63.494	9.26625e-06	5
MSTRG.589.1	75.0229	1.08e-05	5
MSTRG.5897.1	203.325	1.05567e-06	5
MSTRG.6031.1	238.866	1.19e-06	5
MSTRG.6194.1	64.8849	8.95688e-07	5
MSTRG.6263.1	97.6073	2.81229e-06	5
MSTRG.6287.1	305.716	4.32e-07	5
MSTRG.6347.1	92.2334	5.25e-06	5
MSTRG.6384.1	106.804	5.10292e-06	5
MSTRG.6386.1	105.965	1.94375e-06	5
MSTRG.6576.1	138.872	7.26e-06	5
MSTRG.6770.1	67.8627	5.15042e-06	5
MSTRG.6771.1	385.685	6.0825e-06	5
MSTRG.70.3	81.1617	6.96625e-06	5
MSTRG.7074.1	225.047	2.09e-06	5
MSTRG.7394.2	93.827	3.96042e-06	5
MSTRG.7422.1	67.0837	1.22e-06	5
MSTRG.7433.1	65.5977	6.09375e-06	5
MSTRG.7454.1	104.143	4.12e-06	5
MSTRG.7484.1	114.918	5.08667e-06	5
MSTRG.750.1	183.821	8.04e-06	5
MSTRG.7527.1	84.7992	4.05375e-06	5
MSTRG.761.1	76.8219	5.59e-06	5
MSTRG.7680.1	232.434	8.245e-07	5
MSTRG.7966.1	219.797	2.97e-06	5
MSTRG.8094.1	196.536	9.25021e-07	5
MSTRG.8096.1	293.066	2.06562e-06	5
MSTRG.8103.1	65.5903	1.92625e-06	5
MSTRG.8363.1	81.8921	5.94875e-06	5
MSTRG.8371.1	93.8005	4.4e-06	5
MSTRG.8863.4	80.5972	2.8775e-06	5
MSTRG.891.2	138.635	9.14e-06	5
MSTRG.9290.1	91.4768	7.97e-06	5
MSTRG.9497.1	56.6349	3.81917e-06	5
MSTRG.9622.1	75.1156	1.0735e-05	5
MSTRG.9809.1	248.084	4.0925e-06	5
MSTRG.9969.1	110.834	9.26e-06	5
MSTRG.9977.1	66.9654	6.56e-06	5
ACOC_0000014701-mRNA-1	17.9295	0.000124005	6
ACOC_0000025401-mRNA-1	12.7611	0.000230243	6
ACOC_0000025801-mRNA-1	19.9142	8.3246e-05	6
ACOC_0000047401-mRNA-1	5.61033	6.52125e-05	6
ACOC_0000060801-mRNA-1	9.7635	8.65622e-05	6
ACOC_0000070201-mRNA-1	20.1871	5.45458e-05	6
ACOC_0000147901-mRNA-1	19.3352	0.000201338	6
ACOC_0000200201-mRNA-1	17.8577	0.000177706	6
ACOC_0000223701-mRNA-1	19.3847	0.000206101	6
ACOC_0000231601-mRNA-1	18.2811	0.000218735	6
ACOC_0000247901-mRNA-1	7.74297	0.000138001	6
ACOC_0000372301-mRNA-1	10.9127	9.25827e-05	6
ACOC_0000385101-mRNA-1	20.832	0.000138598	6
ACOC_0000387901-mRNA-1	16.1111	6.9875e-05	6
ACOC_0000397501-mRNA-1	17.308	7.8606e-05	6
ACOC_0000412401-mRNA-1	12.8288	9.94079e-05	6
ACOC_0000441801-mRNA-1	11.2516	0.000148684	6
ACOC_0000443601-mRNA-1	14.1114	9.19202e-05	6
ACOC_0000485101-mRNA-1	9.16447	0.000109186	6
ACOC_0000600001-mRNA-1	10.6476	3.29292e-05	6
ACOC_0000601601-mRNA-1	20.3704	0.000167233	6
ACOC_0000655101-mRNA-1	11.1558	5.51813e-05	6
ACOC_0000713901-mRNA-1	18.19	0.000110553	6
ACOC_0000715601-mRNA-1	7.09471	5.52e-05	6
ACOC_0000791601-mRNA-1	23.0066	8.55615e-05	6
ACOC_0000819901-mRNA-1	21.7026	0.000103524	6
ACOC_0000923301-mRNA-1	18.9689	7.5825e-05	6
ACOC_0000951301-mRNA-1	5.14413	0.000134666	6
ACOC_0001050801-mRNA-1	4.48447	0.000241957	6
ACOC_0001147101-mRNA-1	23.1158	5.24583e-05	6
ACOC_0001180601-mRNA-1	10.5889	3.39417e-05	6
ACOC_0001219001-mRNA-1	21.9112	0.000106373	6
ACOC_0001238501-mRNA-1	14.6901	8.84e-05	6
ACOC_0001306201-mRNA-1	17.9597	0.000211368	6
ACOC_0001331401-mRNA-1	13.7534	0.000132066	6
MSTRG.10058.1	10.3075	0.000127928	6
MSTRG.10152.1	16.9616	0.000223007	6
MSTRG.10270.1	12.8446	3.54167e-05	6
MSTRG.10501.1	16.102	0.00013543	6
MSTRG.10703.1	7.42798	0.000153008	6
MSTRG.10821.1	6.1459	9.18e-05	6
MSTRG.10865.1	26.4086	8.2576e-05	6
MSTRG.1092.1	13.9229	0.000115971	6
MSTRG.11065.1	10.9344	4.46875e-05	6
MSTRG.11079.1	14.6809	3.0825e-05	6
MSTRG.1122.1	18.7454	8.03893e-05	6
MSTRG.11266.1	13.1114	0.000140534	6
MSTRG.11505.1	7.99153	3.54e-05	6
MSTRG.11712.2	16.8956	4.90792e-05	6
MSTRG.11806.1	5.32318	0.000117545	6
MSTRG.11866.1	5.94795	0.000250636	6
MSTRG.1189.1	20.0979	0.000122865	6
MSTRG.11892.1	15.3136	0.000332763	6
MSTRG.1196.2	7.96792	7.15479e-05	6
MSTRG.12088.1	11.4597	3.96812e-05	6
MSTRG.12154.1	19.1766	6.04e-05	6
MSTRG.12155.1	8.37553	0.00018473	6
MSTRG.12176.1	6.10177	0.00012466	6
MSTRG.1218.1	24.6486	0.000102004	6
MSTRG.12301.1	17.2171	7.6086e-05	6
MSTRG.12378.1	21.3345	6.60083e-05	6
MSTRG.12688.1	7.63093	3.85e-05	6
MSTRG.1403.1	14.4392	0.000218943	6
MSTRG.1533.1	16.7024	8.97126e-05	6
MSTRG.1677.1	12.4461	8.67847e-05	6
MSTRG.216.1	10.6583	0.000227892	6
MSTRG.2223.2	14.2225	7.83e-05	6
MSTRG.2597.2	10.7044	9.55354e-05	6
MSTRG.2702.1	23.502	9.49166e-05	6
MSTRG.2751.1	18.7972	0.000152878	6
MSTRG.3044.1	9.93152	5.83e-05	6
MSTRG.3440.1	4.05777	0.00021498	6
MSTRG.3740.1	9.63232	4.06125e-05	6
MSTRG.4025.1	19.5684	4.74e-05	6
MSTRG.4065.1	19.3969	4.15437e-05	6
MSTRG.4134.1	12.3589	0.000213195	6
MSTRG.4149.2	11.9819	3.15604e-05	6
MSTRG.416.1	8.62043	0.000310703	6
MSTRG.4340.1	25.1841	0.000101667	6
MSTRG.4360.1	15.6814	0.000193449	6
MSTRG.4585.2	26.2214	8.82767e-05	6
MSTRG.467.1	18.1049	8.68045e-05	6
MSTRG.4676.1	7.48994	4.08042e-05	6
MSTRG.4849.1	22.4736	0.000162408	6
MSTRG.5162.1	17.4572	7.66458e-05	6
MSTRG.5577.1	6.94549	0.000143927	6
MSTRG.5619.1	12.7092	6.36e-05	6
MSTRG.562.1	8.76394	9.69559e-05	6
MSTRG.5664.1	18.8533	6.93542e-05	6
MSTRG.5784.1	5.30973	0.000161417	6
MSTRG.5803.1	7.75552	0.000117411	6
MSTRG.591.1	14.3574	0.000140944	6
MSTRG.6134.1	25.936	6.79901e-05	6
MSTRG.6187.1	7.01572	8.59583e-05	6
MSTRG.6200.1	18.2361	7.12958e-05	6
MSTRG.622.3	14.2547	0.000144594	6
MSTRG.623.1	4.29329	0.000291527	6
MSTRG.6290.1	16.3761	4.14104e-05	6
MSTRG.6340.1	13.9787	3.32062e-05	6
MSTRG.6353.3	8.79392	7.83e-05	6
MSTRG.6362.3	7.83109	0.000162687	6
MSTRG.6423.1	14.579	4.25e-05	6
MSTRG.644.2	16.8938	0.000236507	6
MSTRG.6697.1	12.6658	0.000232456	6
MSTRG.674.2	9.05064	6.50785e-05	6
MSTRG.6769.1	24.1967	5.10625e-05	6
MSTRG.6777.1	22.7782	8.9746e-05	6
MSTRG.6808.1	17.6315	0.000131964	6
MSTRG.7135.1	3.98489	6.5925e-05	6
MSTRG.7168.1	22.6127	6.5892e-05	6
MSTRG.7171.1	8.60255	5.59542e-05	6
MSTRG.7193.1	10.8539	0.000199566	6
MSTRG.7352.1	16.8192	8.80875e-05	6
MSTRG.7446.1	8.94927	0.000221596	6
MSTRG.7463.2	9.83571	3.24979e-05	6
MSTRG.7491.1	4.96462	9.05301e-05	6
MSTRG.753.1	14.5406	4.28e-05	6
MSTRG.7657.3	14.52	9.70257e-05	6
MSTRG.7658.3	11.0149	4.92e-05	6
MSTRG.7675.4	8.61241	0.000371213	6
MSTRG.8085.3	16.8143	6.75228e-05	6
MSTRG.8450.1	8.13684	0.000112707	6
MSTRG.8558.1	14.4727	0.000104142	6
MSTRG.8809.5	19.4349	9.95635e-05	6
MSTRG.9042.1	15.911	4.05958e-05	6
MSTRG.9073.1	23.8599	5.42167e-05	6
MSTRG.9095.1	11.9366	0.000126916	6
MSTRG.9114.1	17.4081	8.84771e-05	6
MSTRG.9254.1	14.5458	4.36108e-05	6
MSTRG.9255.2	11.046	0.000276271	6
MSTRG.9295.1	21.5383	7.28792e-05	6
MSTRG.9328.3	19.4203	0.000172852	6
MSTRG.9472.1	9.16163	9.32458e-05	6
MSTRG.9548.5	13.5933	0.000261501	6
MSTRG.9715.1	15.5178	3.89542e-05	6
ACOC_0000025001-mRNA-1	40.1678	5.34542e-05	7
ACOC_0000071101-mRNA-1	72.8386	0.000100936	7
ACOC_0000117501-mRNA-1	81.9475	7.15773e-05	7
ACOC_0000175301-mRNA-1	61.8761	4.61375e-05	7
ACOC_0000197301-mRNA-1	33.8178	5.95e-05	7
ACOC_0000202001-mRNA-1	75.0831	0.000119815	7
ACOC_0000267901-mRNA-1	46.4163	7.05333e-05	7
ACOC_0000319301-mRNA-1	75.7394	0.000107998	7
ACOC_0000445301-mRNA-1	45.7769	6.69846e-05	7
ACOC_0000455001-mRNA-1	97.25	6.385e-05	7
ACOC_0000464601-mRNA-1	75.1653	0.000137228	7
ACOC_0000485801-mRNA-1	85.4432	6.83e-05	7
ACOC_0000489901-mRNA-1	38.4347	7.31274e-05	7
ACOC_0000505301-mRNA-1	55.6179	0.000121402	7
ACOC_0000526401-mRNA-1	73.3491	8.26075e-05	7
ACOC_0000590601-mRNA-1	93.6357	7.31192e-05	7
ACOC_0000593201-mRNA-1	44.3012	4.58951e-05	7
ACOC_0000593401-mRNA-1	76.8838	4.57188e-05	7
ACOC_0000612201-mRNA-1	84.7169	7.41823e-05	7
ACOC_0000631501-mRNA-1	51.1746	5.715e-05	7
ACOC_0000662701-mRNA-1	31.5638	4.53e-05	7
ACOC_0000710401-mRNA-1	73.5295	8.97717e-05	7
ACOC_0000755701-mRNA-1	42.5778	9.77713e-05	7
ACOC_0000770301-mRNA-1	31.4143	4.34333e-05	7
ACOC_0000806001-mRNA-1	45.3754	0.000101929	7
ACOC_0000909201-mRNA-1	53.4039	9.54545e-05	7
ACOC_0000923901-mRNA-1	33.7764	4.13833e-05	7
ACOC_0000961501-mRNA-1	78.936	1.78958e-05	7
ACOC_0000967601-mRNA-1	70.2464	3.20375e-05	7
ACOC_0000994001-mRNA-1	71.3537	5.42208e-05	7
ACOC_0001075201-mRNA-1	43.9866	5.34396e-05	7
ACOC_0001096001-mRNA-1	56.8629	4.55917e-05	7
ACOC_0001118101-mRNA-1	35.8778	4.62681e-05	7
ACOC_0001121801-mRNA-1	83.7257	7.72262e-05	7
ACOC_0001144701-mRNA-1	59.5939	2.04e-05	7
ACOC_0001154901-mRNA-1	92.0364	4.92e-05	7
ACOC_0001164801-mRNA-1	87.868	6.35583e-05	7
ACOC_0001168101-mRNA-1	56.104	0.000106561	7
ACOC_0001184101-mRNA-1	105.545	7.50375e-05	7
ACOC_0001191801-mRNA-1	79.3877	3.40692e-05	7
ACOC_0001197001-mRNA-1	100.208	2.95458e-05	7
ACOC_0001211401-mRNA-1	80.7591	5.39312e-05	7
ACOC_0001229001-mRNA-1	77.5879	3.63417e-05	7
ACOC_0001242601-mRNA-1	36.1568	4.39375e-05	7
ACOC_0001254501-mRNA-1	40.138	5.06e-05	7
ACOC_0001266101-mRNA-1	100.217	8.34e-05	7
ACOC_0001301401-mRNA-1	47.8192	2.74792e-05	7
ACOC_0001318301-mRNA-1	71.2231	9.3273e-05	7
ACOC_0001323101-mRNA-1	79.2027	1.88479e-05	7
MSTRG.10077.1	63.0457	8.99958e-05	7
MSTRG.10103.1	48.5715	5.89289e-05	7
MSTRG.10184.1	41.7389	4.5975e-05	7
MSTRG.10348.1	92.6401	4.11875e-05	7
MSTRG.10477.1	60.6173	5.0535e-05	7
MSTRG.10485.1	56.6072	8.32146e-05	7
MSTRG.10525.1	30.9188	9.40384e-05	7
MSTRG.10527.1	83.7208	0.000117117	7
MSTRG.10599.1	42.9681	3.34094e-05	7
MSTRG.10672.1	57.8882	8.93e-05	7
MSTRG.10749.1	44.7122	4.49562e-05	7
MSTRG.110.1	38.748	9.57952e-05	7
MSTRG.11163.1	73.1863	2.73e-05	7
MSTRG.11279.1	104.329	5.6868e-05	7
MSTRG.11395.2	80.4436	9.21283e-05	7
MSTRG.11471.1	27.5062	6.41015e-05	7
MSTRG.11485.2	41.4132	8.65898e-05	7
MSTRG.1162.1	36.4347	6.89e-05	7
MSTRG.1169.1	83.6806	3.32496e-05	7
MSTRG.11930.4	51.3089	6.5725e-05	7
MSTRG.12130.3	74.2205	8.00375e-05	7
MSTRG.12306.1	75.1287	4.80401e-05	7
MSTRG.1259.3	63.782	4.09708e-05	7
MSTRG.1260.1	69.2421	2.17854e-05	7
MSTRG.12808.2	105.999	9.01e-05	7
MSTRG.1291.1	52.2656	8.15646e-05	7
MSTRG.1319.1	99.7216	2.86083e-05	7
MSTRG.1486.2	60.2861	0.000102633	7
MSTRG.157.1	42.7109	4.65e-05	7
MSTRG.1613.1	34.501	5.31438e-05	7
MSTRG.1722.1	59.4854	3.41217e-05	7
MSTRG.1729.1	48.5002	4.51125e-05	7
MSTRG.177.2	52.0703	8.67e-05	7
MSTRG.179.1	52.9068	6.4825e-05	7
MSTRG.1885.1	122.398	7.82e-05	7
MSTRG.189.1	48.9977	5.96833e-05	7
MSTRG.1904.1	51.2516	8.15215e-05	7
MSTRG.1992.1	28.0608	5.30708e-05	7
MSTRG.200.1	65.5688	9.66e-05	7
MSTRG.2314.1	90.3749	6.93e-05	7
MSTRG.232.1	101.281	5.28542e-05	7
MSTRG.2398.1	82.3471	1.62762e-05	7
MSTRG.2497.1	42.5942	3.58e-05	7
MSTRG.2542.1	77.977	4.245e-05	7
MSTRG.2603.1	55.3993	2.23e-05	7
MSTRG.2635.1	119.784	5.81625e-05	7
MSTRG.2959.1	83.2853	3.4443e-05	7
MSTRG.3019.1	74.4334	7.76e-05	7
MSTRG.321.1	102.442	6.45128e-05	7
MSTRG.3270.2	80.66	3.10417e-05	7
MSTRG.3295.1	88.6501	5.53375e-05	7
MSTRG.3332.1	48.7469	4.51687e-05	7
MSTRG.337.2	39.7371	8.58014e-05	7
MSTRG.37.1	58.5594	0.000119582	7
MSTRG.3742.1	44.1287	0.000102091	7
MSTRG.3994.1	28.9532	5.24e-05	7
MSTRG.4032.1	89.6326	3.02e-05	7
MSTRG.4061.1	56.2175	0.000102728	7
MSTRG.4136.1	65.8394	6.64063e-05	7
MSTRG.4322.1	26.6643	5.13917e-05	7
MSTRG.4436.2	71.6284	3.65e-05	7
MSTRG.4494.1	37.3092	4.58875e-05	7
MSTRG.4524.1	38.065	3.52e-05	7
MSTRG.4559.1	41.4414	3.83667e-05	7
MSTRG.4679.1	91.974	1.9375e-05	7
MSTRG.4710.1	85.019	9.50954e-05	7
MSTRG.4932.1	58.5239	6.9575e-05	7
MSTRG.4942.1	118.347	5.80625e-05	7
MSTRG.4950.1	95.7258	4.00042e-05	7
MSTRG.5117.1	50.0669	3.25417e-05	7
MSTRG.5203.1	78.0513	3.34458e-05	7
MSTRG.5239.1	33.5923	6.90809e-05	7
MSTRG.533.1	50.4149	2.5725e-05	7
MSTRG.5615.1	94.8868	5.305e-05	7
MSTRG.5680.1	30.7688	5.18667e-05	7
MSTRG.5691.1	59.7978	9.05576e-05	7
MSTRG.5749.1	72.2706	2.32e-05	7
MSTRG.5800.1	68.7723	9.03903e-05	7
MSTRG.5888.1	53.414	2.728e-05	7
MSTRG.5893.2	27.7234	4.49458e-05	7
MSTRG.5911.1	38.7279	8.7848e-05	7
MSTRG.6189.1	113.79	7.32e-05	7
MSTRG.6232.1	73.5679	1.67875e-05	7
MSTRG.6273.1	46.8106	8.05667e-05	7
MSTRG.6275.1	58.1142	3.3075e-05	7
MSTRG.6279.1	88.3003	3.9e-05	7
MSTRG.6295.1	66.5756	3.32667e-05	7
MSTRG.6307.3	48.7294	0.000110382	7
MSTRG.6371.2	75.9853	5.57e-05	7
MSTRG.639.1	35.1928	4.00208e-05	7
MSTRG.6466.3	43.5411	6.285e-05	7
MSTRG.6573.1	42.1321	0.000107146	7
MSTRG.6583.2	33.7444	5.76667e-05	7
MSTRG.6645.1	72.1576	0.000124992	7
MSTRG.6752.1	85.5766	2.35e-05	7
MSTRG.6876.1	45.8204	2.73e-05	7
MSTRG.6894.2	37.6808	4.89292e-05	7
MSTRG.6925.1	67.917	2.95e-05	7
MSTRG.7011.1	90.0796	2.39125e-05	7
MSTRG.7091.1	37.8757	4.68e-05	7
MSTRG.7136.1	41.0834	5.67208e-05	7
MSTRG.7154.1	125.805	8.48e-05	7
MSTRG.7263.1	29.3234	5.05812e-05	7
MSTRG.7311.2	71.6305	1.85846e-05	7
MSTRG.7320.1	31.0886	4.61083e-05	7
MSTRG.7385.1	50.5375	5.74e-05	7
MSTRG.7413.1	64.609	2.26e-05	7
MSTRG.7474.1	62.7713	3.10833e-05	7
MSTRG.7548.1	51.944	9.53e-05	7
MSTRG.7572.1	58.8498	6.8106e-05	7
MSTRG.7591.1	60.4966	3.09063e-05	7
MSTRG.7599.1	35.8315	7.50062e-05	7
MSTRG.7618.1	44.2769	5e-05	7
MSTRG.7634.1	85.1325	4.67417e-05	7
MSTRG.7659.1	58.3067	4.31e-05	7
MSTRG.7692.1	61.9317	7.29563e-05	7
MSTRG.7698.1	42.9575	3.61979e-05	7
MSTRG.7815.1	100.025	7.07339e-05	7
MSTRG.7837.1	29.3528	5.35083e-05	7
MSTRG.7974.1	45.4858	3.47e-05	7
MSTRG.8032.1	42.3401	4.05333e-05	7
MSTRG.8036.3	95.9338	4.27333e-05	7
MSTRG.8085.1	45.8253	8.8335e-05	7
MSTRG.8108.1	85.7069	3.56333e-05	7
MSTRG.8127.1	72.8869	0.000125378	7
MSTRG.8185.1	60.6223	9.90034e-05	7
MSTRG.8373.2	53.0977	9.84213e-05	7
MSTRG.8503.1	54.7492	8.93882e-05	7
MSTRG.8680.1	52.5056	9.70973e-05	7
MSTRG.8773.1	94.9926	2.5565e-05	7
MSTRG.8893.1	81.4037	3.00542e-05	7
MSTRG.8909.1	74.8073	9.73844e-05	7
MSTRG.9101.2	46.5774	3.25625e-05	7
MSTRG.9171.1	52.801	9.29e-05	7
MSTRG.9173.1	83.4126	4.1525e-05	7
MSTRG.9263.1	28.3276	5.47625e-05	7
MSTRG.9373.2	94.8739	3.92481e-05	7
MSTRG.9555.1	60.0063	6.96208e-05	7
MSTRG.9568.1	101.95	5.27167e-05	7
MSTRG.9609.2	65.2105	2.48e-05	7
MSTRG.9635.1	57.0858	3.74208e-05	7
MSTRG.9654.2	110.389	4.6125e-05	7
MSTRG.967.1	65.4889	9.10904e-05	7
MSTRG.9750.2	62.6326	3.46792e-05	7
ACOC_0000012301-mRNA-1	43.7996	0.000366533	8
ACOC_0000042001-mRNA-1	71.5305	0.000369079	8
ACOC_0000079101-mRNA-1	20.2253	0.000245578	8
ACOC_0000082701-mRNA-1	66.6952	0.000577515	8
ACOC_0000091101-mRNA-1	44.2919	0.000139606	8
ACOC_0000144301-mRNA-1	38.7714	0.000673524	8
ACOC_0000184701-mRNA-1	27.759	0.000193312	8
ACOC_0000211201-mRNA-1	28.7445	0.000188728	8
ACOC_0000215701-mRNA-1	24.8873	0.000567545	8
ACOC_0000226601-mRNA-1	34.9412	0.0007418	8
ACOC_0000236601-mRNA-1	69.2311	0.00032253	8
ACOC_0000269601-mRNA-1	34.1562	0.000526806	8
ACOC_0000288001-mRNA-1	24.774	0.000396114	8
ACOC_0000296901-mRNA-1	28.4303	0.000204562	8
ACOC_0000299401-mRNA-1	32.9462	0.000139853	8
ACOC_0000314101-mRNA-1	21.537	0.000229914	8
ACOC_0000338601-mRNA-1	44.4438	0.000285582	8
ACOC_0000352901-mRNA-1	32.3666	0.000265339	8
ACOC_0000406601-mRNA-1	38.431	0.000473078	8
ACOC_0000438501-mRNA-1	57.9082	0.000437409	8
ACOC_0000473701-mRNA-1	32.8017	0.0002034	8
ACOC_0000484901-mRNA-1	63.8256	0.000565535	8
ACOC_0000485301-mRNA-1	69.3494	0.000189263	8
ACOC_0000485501-mRNA-1	19.4784	0.000253164	8
ACOC_0000510001-mRNA-1	30.7789	0.000161887	8
ACOC_0000532401-mRNA-1	63.8269	0.000538405	8
ACOC_0000547501-mRNA-1	37.951	0.000134536	8
ACOC_0000554301-mRNA-1	69.9153	0.000337497	8
ACOC_0000565701-mRNA-1	29.4185	0.000407255	8
ACOC_0000566701-mRNA-1	35.1176	0.000331675	8
ACOC_0000568901-mRNA-1	31.7186	0.000627215	8
ACOC_0000586901-mRNA-1	19.5592	0.000323582	8
ACOC_0000610901-mRNA-1	62.4853	0.000634378	8
ACOC_0000634101-mRNA-1	49.1324	0.000302073	8
ACOC_0000637601-mRNA-1	69.9533	0.000160109	8
ACOC_0000805401-mRNA-1	57.6829	0.000411623	8
ACOC_0000818701-mRNA-1	50.5519	0.000796483	8
ACOC_0000850601-mRNA-1	30.4467	0.000332334	8
ACOC_0000912701-mRNA-1	50.5612	0.000489333	8
ACOC_0000957301-mRNA-1	54.6869	0.000128005	8
ACOC_0001014601-mRNA-1	33.9969	0.000324369	8
ACOC_0001029501-mRNA-1	40.1267	0.000484798	8
ACOC_0001067301-mRNA-1	40.062	0.000212424	8
ACOC_0001075101-mRNA-1	39.5476	0.000154391	8
ACOC_0001101101-mRNA-1	40.2287	0.000241386	8
ACOC_0001202101-mRNA-1	37.4463	0.000281617	8
ACOC_0001215301-mRNA-1	34.8635	0.00011478	8
ACOC_0001277901-mRNA-1	70.3619	0.000341493	8
ACOC_0001291001-mRNA-1	56.1367	0.000524093	8
ACOC_0001301701-mRNA-1	71.4903	0.000160447	8
ACOC_0001338501-mRNA-1	57.5825	0.000517554	8
MSTRG.10066.1	57.9697	0.000372249	8
MSTRG.10283.1	68.5821	0.000154537	8
MSTRG.10341.1	28.5563	0.000127442	8
MSTRG.10718.1	63.1589	0.000185438	8
MSTRG.10773.1	34.2392	0.000133784	8
MSTRG.10795.1	43.4724	0.000204995	8
MSTRG.1081.1	55.0254	0.00026166	8
MSTRG.11036.1	66.3016	0.000207345	8
MSTRG.11067.1	36.1631	0.000281818	8
MSTRG.11128.1	59.3647	0.000305915	8
MSTRG.11614.1	27.9348	0.000502113	8
MSTRG.11694.1	59.4007	0.000426861	8
MSTRG.1202.3	67.8263	0.000278964	8
MSTRG.12038.2	73.5178	0.000290429	8
MSTRG.12187.1	49.6952	0.000155008	8
MSTRG.12191.1	68.0349	0.000230357	8
MSTRG.12230.1	41.6308	0.000256296	8
MSTRG.12412.1	36.1703	0.000194687	8
MSTRG.1257.1	42.7333	0.000166802	8
MSTRG.12582.1	62.111	0.000686363	8
MSTRG.1397.3	28.4581	0.000207479	8
MSTRG.1464.1	48.8546	0.000203089	8
MSTRG.1582.1	22.7339	0.000209506	8
MSTRG.1656.1	50.2913	0.000216379	8
MSTRG.1741.2	49.1677	0.0003844	8
MSTRG.1995.1	28.2518	0.000298512	8
MSTRG.2150.1	54.6815	0.000368912	8
MSTRG.2236.1	67.8122	0.000191502	8
MSTRG.2345.1	59.4612	0.000382829	8
MSTRG.2358.1	55.2079	0.000352949	8
MSTRG.2786.1	46.5763	0.000159132	8
MSTRG.3169.1	24.9741	0.000497583	8
MSTRG.317.1	35.3594	0.000662534	8
MSTRG.3262.1	36.0327	0.0003021	8
MSTRG.3308.1	34.5955	0.000251013	8
MSTRG.3318.1	44.726	0.000161398	8
MSTRG.3501.1	43.2477	0.000174006	8
MSTRG.3685.1	72.7269	0.000324906	8
MSTRG.3871.1	50.8903	0.000127907	8
MSTRG.3881.1	34.133	0.000113204	8
MSTRG.4312.1	63.6773	0.000248475	8
MSTRG.4449.1	56.8659	0.000510475	8
MSTRG.4461.3	49.7017	0.000164502	8
MSTRG.458.1	68.7458	0.000169589	8
MSTRG.460.1	28.963	0.000258982	8
MSTRG.4636.2	25.1535	0.000159033	8
MSTRG.4645.1	25.6142	0.00025644	8
MSTRG.4827.1	34.6175	0.000817591	8
MSTRG.4924.3	23.4607	0.000206903	8
MSTRG.4933.1	38.0253	0.000399582	8
MSTRG.52.1	28.4683	0.000260856	8
MSTRG.5302.1	20.6749	0.000383901	8
MSTRG.5597.1	22.7784	0.000239607	8
MSTRG.5633.1	33.2335	0.000169449	8
MSTRG.6253.1	24.4658	0.000300458	8
MSTRG.6266.1	73.2139	0.000369558	8
MSTRG.6306.1	24.8916	0.000170486	8
MSTRG.6356.1	51.412	0.000158146	8
MSTRG.6382.1	43.3327	0.000371158	8
MSTRG.6542.4	65.4872	0.000524081	8
MSTRG.6561.1	30.3722	0.000341575	8
MSTRG.6652.1	71.3257	0.000161923	8
MSTRG.6663.1	61.8401	0.000688494	8
MSTRG.6767.1	28.8471	0.000144335	8
MSTRG.7103.1	37.0755	0.00028383	8
MSTRG.7334.1	33.1036	0.000656156	8
MSTRG.735.1	65.6913	0.000440197	8
MSTRG.7408.1	53.9678	0.000188597	8
MSTRG.7529.1	35.3393	0.000134883	8
MSTRG.7547.1	50.6602	0.000184027	8
MSTRG.7575.1	50.8992	0.000565588	8
MSTRG.7755.1	55.8237	0.000331867	8
MSTRG.7884.1	38.8216	0.000149978	8
MSTRG.8189.1	17.5146	0.000296972	8
MSTRG.8289.1	22.0289	0.000334429	8
MSTRG.8452.1	38.9258	0.000225528	8
MSTRG.8772.2	50.1824	0.000150758	8
MSTRG.8775.1	28.7007	0.000138782	8
MSTRG.8851.1	40.1026	0.000116077	8
MSTRG.8859.1	37.3775	0.000109806	8
MSTRG.8869.1	25.2173	0.000410146	8
MSTRG.8905.1	28.3813	0.000308437	8
MSTRG.8959.1	56.0587	0.000414586	8
MSTRG.8976.1	39.3543	0.000851052	8
MSTRG.898.1	25.232	0.000383113	8
MSTRG.9079.1	54.1404	0.000227155	8
MSTRG.9208.1	42.227	0.000228245	8
MSTRG.9235.1	41.0129	0.000116228	8
MSTRG.9280.1	73.106	0.000456484	8
MSTRG.9468.1	59.2908	0.000366541	8
MSTRG.9548.3	41.6675	0.000329281	8
MSTRG.9653.1	30.8579	0.000171624	8
MSTRG.9735.1	57.8255	0.000272932	8
ACOC_0000125501-mRNA-1	342.084	6.15e-05	9
ACOC_0000135901-mRNA-1	172.843	9.1626e-05	9
ACOC_0000152401-mRNA-1	316.721	8.87e-06	9
ACOC_0000194401-mRNA-1	192.224	6.30958e-05	9
ACOC_0000424001-mRNA-1	261.589	4.29833e-05	9
ACOC_0000482701-mRNA-1	276.024	2.83438e-05	9
ACOC_0000580301-mRNA-1	125.309	4.13e-05	9
ACOC_0000581301-mRNA-1	145.199	1.22e-05	9
ACOC_0000593801-mRNA-1	180.319	5.55458e-05	9
ACOC_0000615701-mRNA-1	138.709	1.64e-05	9
ACOC_0000772101-mRNA-1	129.615	4.68562e-05	9
ACOC_0000861501-mRNA-1	172.282	1.7375e-05	9
ACOC_0000917801-mRNA-1	187.184	4.92417e-05	9
ACOC_0000938301-mRNA-1	238.119	6.85375e-05	9
ACOC_0000964401-mRNA-1	151.162	3.89125e-05	9
ACOC_0000986901-mRNA-1	106.043	2.79708e-05	9
ACOC_0000996201-mRNA-1	316.723	1.115e-05	9
ACOC_0001218801-mRNA-1	225.121	8.3668e-05	9
ACOC_0001231901-mRNA-1	190.608	3.38e-05	9
ACOC_0001236301-mRNA-1	148.141	5.68833e-05	9
ACOC_0001283101-mRNA-1	550.966	4.96375e-05	9
ACOC_0001323001-mRNA-1	243.563	2.48417e-05	9
MSTRG.10096.1	146.139	4.965e-05	9
MSTRG.10127.1	769.875	2.15e-05	9
MSTRG.10475.1	199.313	1.93875e-05	9
MSTRG.1087.1	99.4868	2.10292e-05	9
MSTRG.10877.1	308.706	1.87292e-05	9
MSTRG.10912.2	197.409	5.63667e-05	9
MSTRG.11151.1	142.315	7.09958e-05	9
MSTRG.11233.1	286.148	0.000102125	9
MSTRG.11270.1	265.38	6.33417e-05	9
MSTRG.11273.1	248.724	1.37e-05	9
MSTRG.1133.1	135.456	4.1275e-05	9
MSTRG.11407.1	488.383	1.65875e-05	9
MSTRG.1146.1	225.921	2.01479e-05	9
MSTRG.12103.2	140.72	5.98e-05	9
MSTRG.12194.1	163.227	4.94e-05	9
MSTRG.12525.1	160.485	1.40417e-05	9
MSTRG.1347.1	155.714	1.76937e-05	9
MSTRG.164.1	354.443	1.49938e-05	9
MSTRG.1661.1	140.608	7.4825e-05	9
MSTRG.1777.1	372.74	1.48446e-05	9
MSTRG.1843.1	262.436	7.40875e-05	9
MSTRG.1872.1	178.335	2.20292e-05	9
MSTRG.212.1	238.615	5.5375e-05	9
MSTRG.2162.1	135.14	3.80825e-05	9
MSTRG.2197.1	153.864	5.13667e-05	9
MSTRG.223.1	144.48	3.11e-05	9
MSTRG.2381.1	136.969	4.165e-05	9
MSTRG.2425.1	191.371	6.35e-05	9
MSTRG.2604.1	190.371	8.14194e-05	9
MSTRG.2632.1	374.109	4.0375e-05	9
MSTRG.2696.1	265.085	6.77675e-05	9
MSTRG.288.2	416.675	4.40958e-05	9
MSTRG.2928.1	376.997	1.061e-05	9
MSTRG.2977.1	168.115	1.49625e-05	9
MSTRG.3228.2	592.152	1.80375e-05	9
MSTRG.348.1	500.413	4.17458e-05	9
MSTRG.3655.1	212.117	2.20179e-05	9
MSTRG.3896.1	128.051	7.115e-05	9
MSTRG.4440.1	184.593	2.41125e-05	9
MSTRG.4508.1	161.603	1.69687e-05	9
MSTRG.4560.1	139.616	4.8e-05	9
MSTRG.4581.1	308.759	7.96712e-05	9
MSTRG.4596.1	216.45	1.70625e-05	9
MSTRG.4630.1	120.668	4.80613e-05	9
MSTRG.4712.2	152.725	4.99208e-05	9
MSTRG.4792.1	111.796	1.75958e-05	9
MSTRG.4823.1	223.021	1.21154e-05	9
MSTRG.4931.1	275.173	1.23792e-05	9
MSTRG.5004.1	192.676	6.87375e-05	9
MSTRG.5053.1	151.549	1.85688e-05	9
MSTRG.5216.1	147.473	5.32571e-05	9
MSTRG.5240.3	175.148	7.21165e-05	9
MSTRG.5241.1	686.977	2.90125e-05	9
MSTRG.5318.1	202.792	9.4515e-05	9
MSTRG.5353.1	280.485	3.125e-05	9
MSTRG.5416.1	168.446	6.41792e-05	9
MSTRG.5475.1	142.751	1.79e-05	9
MSTRG.5553.1	243.106	1.39958e-05	9
MSTRG.5562.1	423.969	3.3e-05	9
MSTRG.5631.2	422.394	9.22e-06	9
MSTRG.5713.1	287.037	6.57781e-05	9
MSTRG.5790.3	135.439	8.31699e-05	9
MSTRG.5828.1	112.791	3.97125e-05	9
MSTRG.5979.1	373.496	7.08083e-06	9
MSTRG.6146.1	170.151	6.40917e-05	9
MSTRG.6156.1	142.673	3.66167e-05	9
MSTRG.6280.1	259.241	7.42131e-05	9
MSTRG.6288.1	182.987	2.30875e-05	9
MSTRG.6293.1	291.339	1.995e-05	9
MSTRG.6328.1	327.879	3.41e-05	9
MSTRG.6389.1	354.698	5.6679e-05	9
MSTRG.6618.2	226.032	7.90436e-05	9
MSTRG.6675.1	156.727	3.2e-05	9
MSTRG.6741.1	224.149	8.10208e-05	9
MSTRG.7014.1	1522.15	1.47e-05	9
MSTRG.7044.1	137.005	4.53208e-05	9
MSTRG.7392.1	201.279	3.54801e-05	9
MSTRG.7516.1	163.066	3.98e-05	9
MSTRG.7633.1	213.447	1.53658e-05	9
MSTRG.7666.1	175.704	2.90706e-05	9
MSTRG.7681.1	686.75	1.41033e-05	9
MSTRG.7816.1	99.6097	1.78792e-05	9
MSTRG.7897.1	215.832	1.65863e-05	9
MSTRG.8647.1	101.34	2.13e-05	9
MSTRG.8741.1	242.707	1.00496e-05	9
MSTRG.8758.1	184.578	1.21017e-05	9
MSTRG.8781.1	117.204	4.3e-05	9
MSTRG.8849.1	195.112	9.62e-05	9
MSTRG.8854.1	145.727	7.57617e-05	9
MSTRG.8865.2	211.285	4.842e-05	9
MSTRG.8895.1	154.416	4.865e-05	9
MSTRG.9160.1	307.309	7.34e-05	9
MSTRG.9224.1	141.433	1.96e-05	9
MSTRG.924.1	703.645	2.65958e-05	9
MSTRG.9248.1	110.244	2.825e-05	9
MSTRG.969.2	312.942	1.40787e-05	9
MSTRG.9893.1	294.742	4.26042e-05	9
MSTRG.9979.1	179.941	4.95958e-05	9
ACOC_0000064501-mRNA-1	15.0949	0.00231145	10
ACOC_0000182301-mRNA-1	25.8291	0.00533339	10
ACOC_0000187501-mRNA-1	8.02852	0.000595794	10
ACOC_0000270101-mRNA-1	32.9842	0.00196129	10
ACOC_0000276601-mRNA-1	19.2634	0.000550954	10
ACOC_0000311501-mRNA-1	9.10004	0.000614449	10
ACOC_0000320001-mRNA-1	9.13882	0.000446074	10
ACOC_0000367801-mRNA-1	21.0864	0.00384199	10
ACOC_0000391801-mRNA-1	2.23788	0.00164044	10
ACOC_0000408401-mRNA-1	7.71129	0.00344311	10
ACOC_0000418701-mRNA-1	9.37431	0.00237089	10
ACOC_0000452301-mRNA-1	38.4619	0.00112849	10
ACOC_0000542701-mRNA-1	38.4929	0.00120708	10
ACOC_0000581801-mRNA-1	21.2156	0.00215519	10
ACOC_0000603601-mRNA-1	8.02734	0.00105811	10
ACOC_0000763201-mRNA-1	6.72869	0.0119543	10
ACOC_0000901201-mRNA-1	16.1435	0.00351108	10
ACOC_0000962901-mRNA-1	24.9312	0.000987915	10
ACOC_0000981501-mRNA-1	32.0943	0.000916246	10
ACOC_0001001801-mRNA-1	24.2464	0.00104894	10
ACOC_0001023501-mRNA-1	23.977	0.000854458	10
ACOC_0001029801-mRNA-1	11.8877	0.00105744	10
ACOC_0001097301-mRNA-1	18.5357	0.00185513	10
ACOC_0001107101-mRNA-1	24.8289	0.000927357	10
ACOC_0001122101-mRNA-1	23.3139	0.00104388	10
ACOC_0001166901-mRNA-1	22.8249	0.00116241	10
ACOC_0001222501-mRNA-1	24.3576	0.000695945	10
MSTRG.10684.1	32.6576	0.00492224	10
MSTRG.11127.1	6.43086	0.00159147	10
MSTRG.11972.1	17.0532	0.00119315	10
MSTRG.12053.1	9.9688	0.00072058	10
MSTRG.12302.1	18.2169	0.00106729	10
MSTRG.1289.1	11.2777	0.000520401	10
MSTRG.1734.1	18.4193	0.00662439	10
MSTRG.1839.1	38.8528	0.00112177	10
MSTRG.1902.1	30.7305	0.000854234	10
MSTRG.3051.2	6.26128	0.00180375	10
MSTRG.3789.2	24.7193	0.00542292	10
MSTRG.3887.1	32.0346	0.00321677	10
MSTRG.4109.1	18.1957	0.000642073	10
MSTRG.4192.1	24.2048	0.000893455	10
MSTRG.5057.1	12.5634	0.00100062	10
MSTRG.5099.2	12.8141	0.000975919	10
MSTRG.6201.1	37.8074	0.0012714	10
MSTRG.6553.1	19.0871	0.002045	10
MSTRG.6929.1	2.94715	0.000813794	10
MSTRG.7191.1	30.6501	0.000930113	10
MSTRG.7210.1	26.966	0.011812	10
MSTRG.7497.1	37.2086	0.0016464	10
MSTRG.764.1	22.7298	0.00144501	10
MSTRG.7657.1	11.6677	0.000475422	10
MSTRG.786.1	33.2192	0.000854529	10
MSTRG.8291.1	9.39028	0.00336048	10
MSTRG.8555.1	6.81659	0.000509163	10
MSTRG.8906.2	16.9111	0.000521867	10
MSTRG.8939.1	21.0554	0.000839732	10
MSTRG.8963.1	14.8629	0.000441615	10
MSTRG.9286.1	5.7493	0.000489899	10
MSTRG.9770.1	25.7928	0.00144722	10
MSTRG.9770.3	5.20912	0.0013985	10
ACOC_0000013401-mRNA-1	184.205	0.000157623	11
ACOC_0000018901-mRNA-1	132.83	8.91544e-05	11
ACOC_0000023201-mRNA-1	85.6796	0.000171732	11
ACOC_0000024701-mRNA-1	131.748	0.000151245	11
ACOC_0000027801-mRNA-1	243.042	0.000385504	11
ACOC_0000084101-mRNA-1	84.3171	0.000547547	11
ACOC_0000109201-mRNA-1	154.629	9.95666e-05	11
ACOC_0000151901-mRNA-1	183.93	0.000346869	11
ACOC_0000172801-mRNA-1	183.843	0.00015261	11
ACOC_0000183301-mRNA-1	88.2663	0.000159869	11
ACOC_0000184801-mRNA-1	127.85	0.000567101	11
ACOC_0000208801-mRNA-1	136.416	0.000154605	11
ACOC_0000224001-mRNA-1	141.871	0.000327177	11
ACOC_0000235901-mRNA-1	95.3976	0.000403509	11
ACOC_0000247801-mRNA-1	85.6246	0.000177983	11
ACOC_0000286301-mRNA-1	83.1616	0.000333492	11
ACOC_0000309101-mRNA-1	134.107	0.000367061	11
ACOC_0000334301-mRNA-1	113.724	0.000365529	11
ACOC_0000334601-mRNA-1	171.225	0.000279636	11
ACOC_0000368401-mRNA-1	151.229	0.00014807	11
ACOC_0000394101-mRNA-1	86.6548	0.000128526	11
ACOC_0000406401-mRNA-1	124.005	0.00012749	11
ACOC_0000417801-mRNA-1	161.675	0.00041653	11
ACOC_0000434501-mRNA-1	205.787	0.00040141	11
ACOC_0000443501-mRNA-1	134.957	0.000226616	11
ACOC_0000515101-mRNA-1	121.336	0.000154577	11
ACOC_0000515601-mRNA-1	85.4985	0.000545248	11
ACOC_0000532801-mRNA-1	92.3659	0.000149263	11
ACOC_0000539801-mRNA-1	97.158	0.000114045	11
ACOC_0000575601-mRNA-1	107.05	0.00054728	11
ACOC_0000619801-mRNA-1	218.131	0.000206588	11
ACOC_0000652001-mRNA-1	91.2076	0.000223755	11
ACOC_0000681601-mRNA-1	91.4403	0.000418017	11
ACOC_0000687501-mRNA-1	152.248	0.000149269	11
ACOC_0000704901-mRNA-1	139.014	0.000157075	11
ACOC_0000747401-mRNA-1	92.9917	0.000157814	11
ACOC_0000748401-mRNA-1	88.4053	0.000260742	11
ACOC_0000755501-mRNA-1	85.6996	0.000174098	11
ACOC_0000764401-mRNA-1	123.595	0.000259817	11
ACOC_0000765301-mRNA-1	176.634	0.00023247	11
ACOC_0000775901-mRNA-1	285.855	0.00032185	11
ACOC_0000818601-mRNA-1	137.684	0.000211221	11
ACOC_0000836401-mRNA-1	116.891	0.000333223	11
ACOC_0000853301-mRNA-1	126.748	0.000123467	11
ACOC_0000877401-mRNA-1	109.327	0.000246426	11
ACOC_0000950401-mRNA-1	78.4672	0.000296447	11
ACOC_0000961201-mRNA-1	103.956	0.000601237	11
ACOC_0000961301-mRNA-1	265.055	0.000164646	11
ACOC_0000963001-mRNA-1	171.313	0.000104941	11
ACOC_0001001201-mRNA-1	122.013	0.000245789	11
ACOC_0001035201-mRNA-1	193.048	0.000594291	11
ACOC_0001058401-mRNA-1	207.116	0.000626589	11
ACOC_0001066601-mRNA-1	163.758	0.000262428	11
ACOC_0001116701-mRNA-1	138.784	0.000200546	11
ACOC_0001127001-mRNA-1	83.7495	0.000137549	11
ACOC_0001178901-mRNA-1	131.844	0.000170534	11
ACOC_0001211901-mRNA-1	144.771	0.000556669	11
ACOC_0001263301-mRNA-1	185.351	0.000522846	11
ACOC_0001270101-mRNA-1	179.345	0.000199381	11
ACOC_0001291101-mRNA-1	276.838	0.000428609	11
ACOC_0001295001-mRNA-1	138.388	0.000747622	11
MSTRG.10130.1	97.8077	0.000223572	11
MSTRG.10143.1	199.909	0.000195099	11
MSTRG.10438.1	209.332	0.000566868	11
MSTRG.10569.1	144.515	9.15917e-05	11
MSTRG.10746.1	135.329	0.000540823	11
MSTRG.10855.1	102.938	0.000181729	11
MSTRG.10937.1	106.253	0.000111042	11
MSTRG.11140.1	139.303	0.000574534	11
MSTRG.1115.1	93.9588	0.00061224	11
MSTRG.11170.1	110.942	0.000162825	11
MSTRG.11272.1	150.679	0.000131405	11
MSTRG.1132.1	131.045	0.000112485	11
MSTRG.11362.1	145.96	0.000344167	11
MSTRG.116.2	79.8073	0.00015345	11
MSTRG.11611.1	159.804	0.000247209	11
MSTRG.11748.1	248.432	0.000179898	11
MSTRG.11872.1	173.324	0.000393102	11
MSTRG.12125.1	168.207	0.00026698	11
MSTRG.1214.2	136.731	0.000469612	11
MSTRG.12167.1	94.5623	0.000176131	11
MSTRG.12173.1	104.581	0.000114545	11
MSTRG.12232.1	109.081	0.000293342	11
MSTRG.12371.1	184.665	0.00046689	11
MSTRG.12394.2	214.219	0.000108506	11
MSTRG.12475.1	135.618	0.000338005	11
MSTRG.12490.1	201.671	0.000286453	11
MSTRG.12545.1	89.8411	0.000265784	11
MSTRG.12568.1	287.952	0.000235496	11
MSTRG.12594.1	80.4973	0.000404761	11
MSTRG.12953.1	152.976	9.3836e-05	11
MSTRG.133.1	113.712	0.000101842	11
MSTRG.1485.1	208.202	0.000492056	11
MSTRG.1514.2	259.113	0.000234469	11
MSTRG.1546.1	116.575	0.00027818	11
MSTRG.156.2	170.38	0.00011385	11
MSTRG.1584.1	204.165	0.000664904	11
MSTRG.1844.1	119.341	0.000404257	11
MSTRG.2033.1	150.396	0.00019778	11
MSTRG.2040.1	166.608	0.000163915	11
MSTRG.2089.1	135.236	0.000102259	11
MSTRG.2232.1	185.902	0.00019705	11
MSTRG.2243.1	105.693	0.000475232	11
MSTRG.2257.1	186.95	0.000495022	11
MSTRG.226.1	154.261	0.000141513	11
MSTRG.2432.3	84.9354	0.000579372	11
MSTRG.3053.1	103.254	0.000514963	11
MSTRG.3263.1	197.287	0.00029002	11
MSTRG.329.1	170.045	0.000257414	11
MSTRG.330.1	88.1779	0.000334595	11
MSTRG.3446.2	296.431	0.000290483	11
MSTRG.3591.1	159.25	0.000226891	11
MSTRG.3726.1	113.875	0.00028001	11
MSTRG.438.1	142.446	0.000610049	11
MSTRG.4525.1	131.461	0.000450949	11
MSTRG.4687.1	95.88	0.000232554	11
MSTRG.4702.1	198.317	0.000342789	11
MSTRG.4726.1	170.721	0.000589004	11
MSTRG.477.1	80.5112	0.000219076	11
MSTRG.4773.5	129.459	0.00013411	11
MSTRG.4807.1	164.884	0.000361546	11
MSTRG.4880.1	133.726	0.000301751	11
MSTRG.495.1	97.3944	0.000158647	11
MSTRG.4972.1	118.714	0.000175208	11
MSTRG.4973.1	134.79	0.000107564	11
MSTRG.4973.2	105.557	0.000106083	11
MSTRG.498.1	114.493	0.000229982	11
MSTRG.5110.1	113.955	0.000147271	11
MSTRG.5151.1	136.637	0.000337849	11
MSTRG.5272.1	107.129	0.000174115	11
MSTRG.5274.1	104.635	0.000172319	11
MSTRG.5277.1	111.99	0.000347921	11
MSTRG.5315.1	99.0527	0.000172929	11
MSTRG.5447.1	91.6842	0.000523004	11
MSTRG.5473.1	149.985	0.000295324	11
MSTRG.5509.1	100.493	0.000286238	11
MSTRG.560.1	95.6927	0.000571962	11
MSTRG.5645.1	121.775	0.000179702	11
MSTRG.5702.1	241.294	0.000481809	11
MSTRG.5706.1	156.114	0.000478702	11
MSTRG.5709.1	99.9593	0.000477951	11
MSTRG.578.1	88.1775	0.000126062	11
MSTRG.5905.1	141.902	0.000270039	11
MSTRG.5972.1	201.546	0.000609494	11
MSTRG.6010.1	143.95	0.000111546	11
MSTRG.6029.1	154.418	0.000222023	11
MSTRG.6041.1	152.054	0.000648344	11
MSTRG.6116.1	101.939	0.000354617	11
MSTRG.6190.1	138.397	0.000615817	11
MSTRG.6227.1	189.066	0.000418233	11
MSTRG.6229.1	138.53	0.000464874	11
MSTRG.6272.1	233.559	0.00017563	11
MSTRG.6303.2	96.5099	0.00047256	11
MSTRG.6413.2	89.8561	0.000607127	11
MSTRG.6419.1	108.37	0.000161727	11
MSTRG.6444.1	248.133	0.000342466	11
MSTRG.6451.1	114.957	0.000505926	11
MSTRG.6466.1	95.3507	0.00012497	11
MSTRG.6476.1	115.256	0.00042354	11
MSTRG.6751.1	100.829	0.000349894	11
MSTRG.6933.1	97.6557	0.000653877	11
MSTRG.7029.1	163.929	0.000332307	11
MSTRG.7042.1	152.912	0.000207902	11
MSTRG.7285.1	135.927	0.000357177	11
MSTRG.7375.2	84.2387	0.000220532	11
MSTRG.747.1	162.7	0.00039416	11
MSTRG.751.1	80.1894	0.000275517	11
MSTRG.7542.1	96.7915	0.000169456	11
MSTRG.7631.1	162.678	0.000177325	11
MSTRG.7752.1	86.8734	0.000277659	11
MSTRG.7928.3	182.645	0.000659381	11
MSTRG.7934.1	175.326	0.000106068	11
MSTRG.7959.1	102.324	0.000421017	11
MSTRG.819.1	250.745	0.000329926	11
MSTRG.8290.1	126.957	0.000686114	11
MSTRG.8749.1	267.908	0.000538706	11
MSTRG.883.1	197.092	0.000198951	11
MSTRG.8951.1	78.0567	0.000307318	11
MSTRG.9157.1	107.497	0.000617502	11
MSTRG.9239.1	137.983	9.85e-05	11
MSTRG.9252.1	97.7185	0.000423005	11
MSTRG.9329.1	151.276	0.000134945	11
MSTRG.9357.1	80.0067	0.000557501	11
MSTRG.9499.1	266.339	0.000117904	11
MSTRG.9584.1	165.205	0.000625393	11
MSTRG.9671.1	133.98	0.000166295	11
MSTRG.9783.3	79.7956	0.000538931	11
MSTRG.9874.1	98.8832	0.000479182	11
MSTRG.993.1	99.243	0.000562029	11
MSTRG.9941.1	112.475	0.000292177	11
ACOC_0000004101-mRNA-1	87.1245	0.000740949	12
ACOC_0000027601-mRNA-1	77.9482	0.00272757	12
ACOC_0000147301-mRNA-1	77.295	0.00241484	12
ACOC_0000154101-mRNA-1	106.569	0.000895051	12
ACOC_0000159801-mRNA-1	74.0739	0.00206694	12
ACOC_0000173601-mRNA-1	118.909	0.00601299	12
ACOC_0000198601-mRNA-1	58.7201	0.000802542	12
ACOC_0000296001-mRNA-1	95.1516	0.00178352	12
ACOC_0000316401-mRNA-1	35.7391	0.00731998	12
ACOC_0000394701-mRNA-1	69.3119	0.00167715	12
ACOC_0000400501-mRNA-1	124.828	0.000821564	12
ACOC_0000459701-mRNA-1	163.253	0.00281218	12
ACOC_0000482401-mRNA-1	123.419	0.00112114	12
ACOC_0000595801-mRNA-1	68.9929	0.00108412	12
ACOC_0000632901-mRNA-1	95.1754	0.00701912	12
ACOC_0000645201-mRNA-1	77.3328	0.00224332	12
ACOC_0000664101-mRNA-1	72.669	0.000918541	12
ACOC_0000702401-mRNA-1	91.2594	0.00176247	12
ACOC_0000744801-mRNA-1	102.482	0.00238929	12
ACOC_0000763301-mRNA-1	67.2928	0.00257902	12
ACOC_0000768901-mRNA-1	60.6269	0.00160837	12
ACOC_0000777401-mRNA-1	107.65	0.00160005	12
ACOC_0000834501-mRNA-1	158.044	0.00169202	12
ACOC_0000845101-mRNA-1	106.362	0.00355419	12
ACOC_0000871401-mRNA-1	137.704	0.00140615	12
ACOC_0000959301-mRNA-1	102.808	0.00397838	12
ACOC_0000988301-mRNA-1	122.498	0.00239475	12
ACOC_0001068301-mRNA-1	48.7792	0.000899759	12
ACOC_0001103401-mRNA-1	92.395	0.00327561	12
ACOC_0001142401-mRNA-1	185.018	0.005276	12
ACOC_0001205201-mRNA-1	139.883	0.00149303	12
ACOC_0001219601-mRNA-1	181.046	0.00194149	12
ACOC_0001238001-mRNA-1	60.3783	0.00207566	12
ACOC_0001257201-mRNA-1	55.7922	0.00119388	12
ACOC_0001312401-mRNA-1	58.4562	0.0015951	12
MSTRG.10205.1	73.2797	0.0019176	12
MSTRG.10385.2	107.006	0.00100509	12
MSTRG.10403.1	137.752	0.00174443	12
MSTRG.10631.2	173.52	0.00115205	12
MSTRG.10665.1	117.632	0.00595389	12
MSTRG.10824.1	87.9316	0.00109147	12
MSTRG.11335.1	101.003	0.00143362	12
MSTRG.1137.1	52.0992	0.00146791	12
MSTRG.11534.1	37.299	0.00549734	12
MSTRG.11925.1	98.3723	0.00100074	12
MSTRG.12198.1	123.868	0.00597902	12
MSTRG.12200.2	138.81	0.00137968	12
MSTRG.12785.1	74.5907	0.00128701	12
MSTRG.12960.2	96.5992	0.000824608	12
MSTRG.145.1	49.4826	0.00182475	12
MSTRG.1555.1	51.1431	0.0009261	12
MSTRG.1738.1	164.387	0.000897022	12
MSTRG.1893.1	53.7771	0.00123582	12
MSTRG.3189.1	148.003	0.00395158	12
MSTRG.3366.1	40.6014	0.00113311	12
MSTRG.380.1	68.1196	0.000940977	12
MSTRG.433.1	133.565	0.0013853	12
MSTRG.4367.1	104.487	0.00827027	12
MSTRG.4688.2	117.447	0.000932502	12
MSTRG.4774.1	63.6442	0.00125407	12
MSTRG.4806.1	73.9249	0.000974829	12
MSTRG.5104.5	57.5129	0.0014329	12
MSTRG.5559.1	157.142	0.00601689	12
MSTRG.5674.1	100.154	0.00153201	12
MSTRG.5743.1	45.1622	0.00142954	12
MSTRG.5809.1	62.7274	0.00130714	12
MSTRG.5861.4	38.781	0.00299601	12
MSTRG.6464.1	85.913	0.00072986	12
MSTRG.6468.1	83.7593	0.00103299	12
MSTRG.6555.1	70.8345	0.00355448	12
MSTRG.6626.1	44.2629	0.00115656	12
MSTRG.6677.1	145.251	0.00205085	12
MSTRG.6972.1	151.427	0.00396884	12
MSTRG.7024.5	174.398	0.00667648	12
MSTRG.7034.1	78.1678	0.00130118	12
MSTRG.7162.1	84.9781	0.00272089	12
MSTRG.7310.1	170.961	0.000889507	12
MSTRG.7332.1	74.3487	0.00476946	12
MSTRG.7344.1	126.065	0.00246881	12
MSTRG.7472.1	70.8571	0.00516505	12
MSTRG.7792.1	139.386	0.00621075	12
MSTRG.7985.1	45.2635	0.00195782	12
MSTRG.8316.2	92.2528	0.000882044	12
MSTRG.8369.1	170.42	0.00148752	12
MSTRG.8681.1	166.725	0.00504595	12
MSTRG.9046.1	150.125	0.00116516	12
MSTRG.9190.1	108.69	0.00277761	12
MSTRG.9788.1	161.78	0.00140616	12
MSTRG.9818.1	113.103	0.00168105	12
ACOC_0000057401-mRNA-1	14.7558	2.12e-06	13
ACOC_0000243901-mRNA-1	38.2572	5.57e-06	13
ACOC_0000361101-mRNA-1	22.5287	2.0175e-06	13
ACOC_0000375001-mRNA-1	11.2642	4.99375e-06	13
ACOC_0000380301-mRNA-1	19.9902	1.67e-06	13
ACOC_0000444201-mRNA-1	20.959	1.46e-06	13
ACOC_0000486701-mRNA-1	19.9061	5.22875e-06	13
ACOC_0000989901-mRNA-1	41.4045	3.03083e-06	13
ACOC_0001289901-mRNA-1	9.70117	3.94e-06	13
MSTRG.1006.1	8.29921	1.23e-06	13
MSTRG.10094.1	36.3406	4.01125e-06	13
MSTRG.10316.1	18.5635	3.88e-07	13
MSTRG.10467.1	20.6328	2.142e-06	13
MSTRG.10640.1	26.2458	6.0925e-06	13
MSTRG.1089.1	36.9159	4.53417e-06	13
MSTRG.11029.1	14.8373	4.38917e-06	13
MSTRG.11080.1	18.4953	1.09906e-06	13
MSTRG.11126.1	8.5081	1.35e-06	13
MSTRG.11131.1	42.8627	3.94042e-06	13
MSTRG.11135.1	16.9421	1.3825e-06	13
MSTRG.11242.1	20.9321	9.33e-07	13
MSTRG.11462.1	38.2177	4.71e-06	13
MSTRG.11501.2	34.3738	4.10875e-06	13
MSTRG.12631.1	13.4824	5.71e-06	13
MSTRG.1312.1	18.0151	1.94046e-06	13
MSTRG.1670.1	27.7533	7.81e-07	13
MSTRG.1763.1	45.6373	1.23e-06	13
MSTRG.1807.1	13.1525	3.71e-06	13
MSTRG.1941.1	18.5749	1.01539e-06	13
MSTRG.2014.1	38.4503	2.09425e-06	13
MSTRG.2065.2	33.9668	4.985e-06	13
MSTRG.2109.1	31.7913	3.93437e-06	13
MSTRG.2163.1	31.5582	3.87e-06	13
MSTRG.2237.1	13.6229	7.14e-06	13
MSTRG.2256.1	32.3595	3.88e-06	13
MSTRG.2294.1	38.0356	9.44e-07	13
MSTRG.2562.1	42.7843	3.76e-06	13
MSTRG.330.3	24.729	2.99e-06	13
MSTRG.3554.1	13.4863	2.86e-06	13
MSTRG.4265.1	40.1765	1.04919e-06	13
MSTRG.4286.1	29.1203	1.9e-06	13
MSTRG.4300.1	25.4613	5.98875e-06	13
MSTRG.4348.1	43.2193	2.21e-06	13
MSTRG.4672.1	41.8563	2.89758e-06	13
MSTRG.482.1	44.5105	3.06292e-06	13
MSTRG.491.1	12.5984	4.87625e-06	13
MSTRG.4971.1	33.3907	1.99417e-06	13
MSTRG.5116.1	48.8326	2.00562e-06	13
MSTRG.5772.1	21.4835	5.96375e-06	13
MSTRG.6051.1	13.4255	4.93e-06	13
MSTRG.6284.1	17.571	3.00125e-06	13
MSTRG.6381.1	38.5385	2.015e-06	13
MSTRG.654.1	34.7273	5.80312e-06	13
MSTRG.6601.1	31.3864	1.92375e-06	13
MSTRG.662.1	40.9837	3.11333e-06	13
MSTRG.6667.3	23.9873	6.01e-06	13
MSTRG.6828.1	11.6779	8.66e-07	13
MSTRG.6948.1	13.0584	1.99813e-06	13
MSTRG.7141.1	17.9368	4.82e-06	13
MSTRG.7152.1	33.2533	1.09275e-06	13
MSTRG.7315.1	24.7819	4.19e-06	13
MSTRG.7576.1	17.6579	2.59e-06	13
MSTRG.8443.1	30.3166	4.445e-06	13
MSTRG.8532.1	18.0339	3.96958e-06	13
MSTRG.8541.1	52.475	1.883e-06	13
MSTRG.8722.1	8.09946	3.94e-07	13
MSTRG.9004.1	17.2391	1.2e-06	13
MSTRG.9115.1	19.4603	3.18e-06	13
MSTRG.9180.1	32.062	2.08e-06	13
MSTRG.9191.1	14.1736	2.71e-06	13
MSTRG.9313.1	31.1206	4.17208e-06	13
MSTRG.9591.1	9.03858	2.89e-06	13
MSTRG.9614.1	19.0804	4.0975e-06	13
ACOC_0000008801-mRNA-1	419.77	0.0012	14
ACOC_0000016501-mRNA-1	245.287	0.00172666	14
ACOC_0000052601-mRNA-1	434.72	0.00205811	14
ACOC_0000090101-mRNA-1	758.411	0.0023017	14
ACOC_0000091701-mRNA-1	276.071	0.00380448	14
ACOC_0000103401-mRNA-1	685.285	0.00239546	14
ACOC_0000107901-mRNA-1	709.96	0.00268446	14
ACOC_0000141601-mRNA-1	328.948	0.00196198	14
ACOC_0000153601-mRNA-1	232.322	0.00424558	14
ACOC_0000154301-mRNA-1	320.774	0.00698354	14
ACOC_0000176501-mRNA-1	278.246	0.00259433	14
ACOC_0000433101-mRNA-1	265.626	0.00146066	14
ACOC_0000447001-mRNA-1	566.033	0.00197206	14
ACOC_0000457101-mRNA-1	337.837	0.00902188	14
ACOC_0000485001-mRNA-1	424.067	0.00138174	14
ACOC_0000515301-mRNA-1	419.664	0.000563762	14
ACOC_0000560901-mRNA-1	496.872	0.0010149	14
ACOC_0000562401-mRNA-1	234.25	0.00393786	14
ACOC_0000728101-mRNA-1	582.509	0.00183113	14
ACOC_0000735401-mRNA-1	574.316	0.00162742	14
ACOC_0000766801-mRNA-1	435.198	0.00159432	14
ACOC_0000853501-mRNA-1	301.759	0.00180387	14
ACOC_0000880701-mRNA-1	277.446	0.00191449	14
ACOC_0000886201-mRNA-1	414.624	0.00110073	14
ACOC_0000891401-mRNA-1	184.4	0.000897176	14
ACOC_0000900301-mRNA-1	380.244	0.00246559	14
ACOC_0000932201-mRNA-1	243.152	0.000938207	14
ACOC_0000949401-mRNA-1	419.426	0.00398353	14
ACOC_0001040601-mRNA-1	420.653	0.000711454	14
ACOC_0001087601-mRNA-1	494.98	0.00253213	14
ACOC_0001088401-mRNA-1	256.542	0.00620066	14
ACOC_0001103501-mRNA-1	309.046	0.00214932	14
ACOC_0001129101-mRNA-1	294.539	0.00799687	14
ACOC_0001133801-mRNA-1	675.55	0.00339513	14
ACOC_0001142801-mRNA-1	279.386	0.0038294	14
ACOC_0001159001-mRNA-1	186.975	0.0012273	14
ACOC_0001159801-mRNA-1	456.766	0.00314175	14
ACOC_0001202501-mRNA-1	392.908	0.00455596	14
ACOC_0001249301-mRNA-1	532.835	0.00137543	14
ACOC_0001251601-mRNA-1	471.474	0.00176913	14
ACOC_0001282101-mRNA-1	851.513	0.00216852	14
ACOC_0001298901-mRNA-1	508.693	0.00331229	14
ACOC_0001300301-mRNA-1	237.52	0.00320245	14
ACOC_0001316101-mRNA-1	406.305	0.00164293	14
MSTRG.10330.1	608.789	0.00133516	14
MSTRG.10540.1	253.553	0.00183908	14
MSTRG.10583.1	320.69	0.000769422	14
MSTRG.10931.1	315.646	0.00133518	14
MSTRG.11324.1	217.468	0.00296943	14
MSTRG.11563.1	921.722	0.00183549	14
MSTRG.11759.1	417.45	0.00161103	14
MSTRG.1256.1	275.902	0.00189038	14
MSTRG.12652.1	340.488	0.000837312	14
MSTRG.1563.1	184.792	0.000847135	14
MSTRG.1614.1	194.476	0.00148649	14
MSTRG.1679.1	185.69	0.00113748	14
MSTRG.1914.1	349.31	0.00105508	14
MSTRG.2187.1	360.066	0.00109934	14
MSTRG.2613.1	364.85	0.00107396	14
MSTRG.2874.1	683.101	0.00274348	14
MSTRG.308.1	794.81	0.000903153	14
MSTRG.3358.1	214.811	0.00403898	14
MSTRG.3755.1	264.756	0.00225495	14
MSTRG.3773.1	455.357	0.0007338	14
MSTRG.394.1	246.169	0.000808279	14
MSTRG.398.3	377.911	0.000586187	14
MSTRG.4254.1	744.402	0.00115144	14
MSTRG.4443.1	636.779	0.00101571	14
MSTRG.4489.1	270.966	0.0025402	14
MSTRG.4498.1	367.161	0.00123572	14
MSTRG.4970.3	293.345	0.000832019	14
MSTRG.5015.1	225.554	0.0010389	14
MSTRG.5031.1	328.642	0.00102998	14
MSTRG.5039.1	259.58	0.000700541	14
MSTRG.5299.1	649.868	0.00224049	14
MSTRG.5361.1	460.92	0.0035728	14
MSTRG.5636.1	347.386	0.000510402	14
MSTRG.5861.1	404.694	0.00133458	14
MSTRG.61.1	503.717	0.000614978	14
MSTRG.6353.1	424.663	0.00112534	14
MSTRG.6363.1	567.487	0.00093489	14
MSTRG.6538.1	439.623	0.00212992	14
MSTRG.6710.1	463.011	0.00122111	14
MSTRG.6802.1	341.868	0.00104912	14
MSTRG.7024.1	424.26	0.00640348	14
MSTRG.7254.1	294.632	0.000857301	14
MSTRG.7329.1	366.549	0.000523359	14
MSTRG.7366.1	350.432	0.00554313	14
MSTRG.7457.4	457.618	0.00209606	14
MSTRG.7626.1	902.96	0.000933442	14
MSTRG.7739.1	448.863	0.00552113	14
MSTRG.7993.1	660.49	0.00110899	14
MSTRG.8000.1	211.21	0.00234043	14
MSTRG.8016.1	263.918	0.0015621	14
MSTRG.8351.2	375.972	0.00202682	14
MSTRG.8393.1	261.915	0.000954993	14
MSTRG.865.1	282.163	0.00140963	14
MSTRG.8896.1	230.092	0.002208	14
MSTRG.9134.1	273.545	0.00126966	14
MSTRG.9355.1	297.178	0.00425188	14
MSTRG.9383.4	683.299	0.00167666	14
MSTRG.9991.1	274.742	0.00068087	14
ACOC_0000078701-mRNA-1	782.961	0.00483831	15
ACOC_0000176401-mRNA-1	1277.17	0.00268023	15
ACOC_0000186201-mRNA-1	3973.41	0.00320923	15
ACOC_0000288101-mRNA-1	1157.32	0.0149402	15
ACOC_0000365901-mRNA-1	1319.5	0.00198891	15
ACOC_0000547101-mRNA-1	1780.36	0.00147818	15
ACOC_0000604701-mRNA-1	4893.81	0.00307745	15
ACOC_0000738601-mRNA-1	332.514	0.0793962	15
ACOC_0000790301-mRNA-1	1218.9	0.00231986	15
ACOC_0000890001-mRNA-1	1950.13	0.0190819	15
ACOC_0001004401-mRNA-1	1052.36	0.00368685	15
ACOC_0001006101-mRNA-1	1855.18	0.0125576	15
ACOC_0001039401-mRNA-1	4983.92	0.0178161	15
ACOC_0001097201-mRNA-1	1105.41	0.0087896	15
ACOC_0001250301-mRNA-1	1217.06	0.00806485	15
ACOC_0001282401-mRNA-1	5044.3	0.013662	15
MSTRG.10173.1	2346.93	0.00167588	15
MSTRG.10706.1	1547.88	0.132488	15
MSTRG.12210.1	2097.95	0.00820689	15
MSTRG.2686.1	999.613	0.00889118	15
MSTRG.3602.1	1656.83	0.00233644	15
MSTRG.385.1	952.248	0.00915694	15
MSTRG.4625.1	51769.6	0.0417382	15
MSTRG.5012.1	1956.06	0.00214947	15
MSTRG.6137.1	3101.58	0.000862829	15
MSTRG.7274.1	1605.93	0.00315001	15
MSTRG.9964.1	1579.6	0.00171672	15
